# Supplementary material for: Endoparasitoid lifestyle promotes endogenization and domestication of dsDNA viruses
Source: eLife journal article supplement (doi:10.7554/elife.85993), 2023-05-12

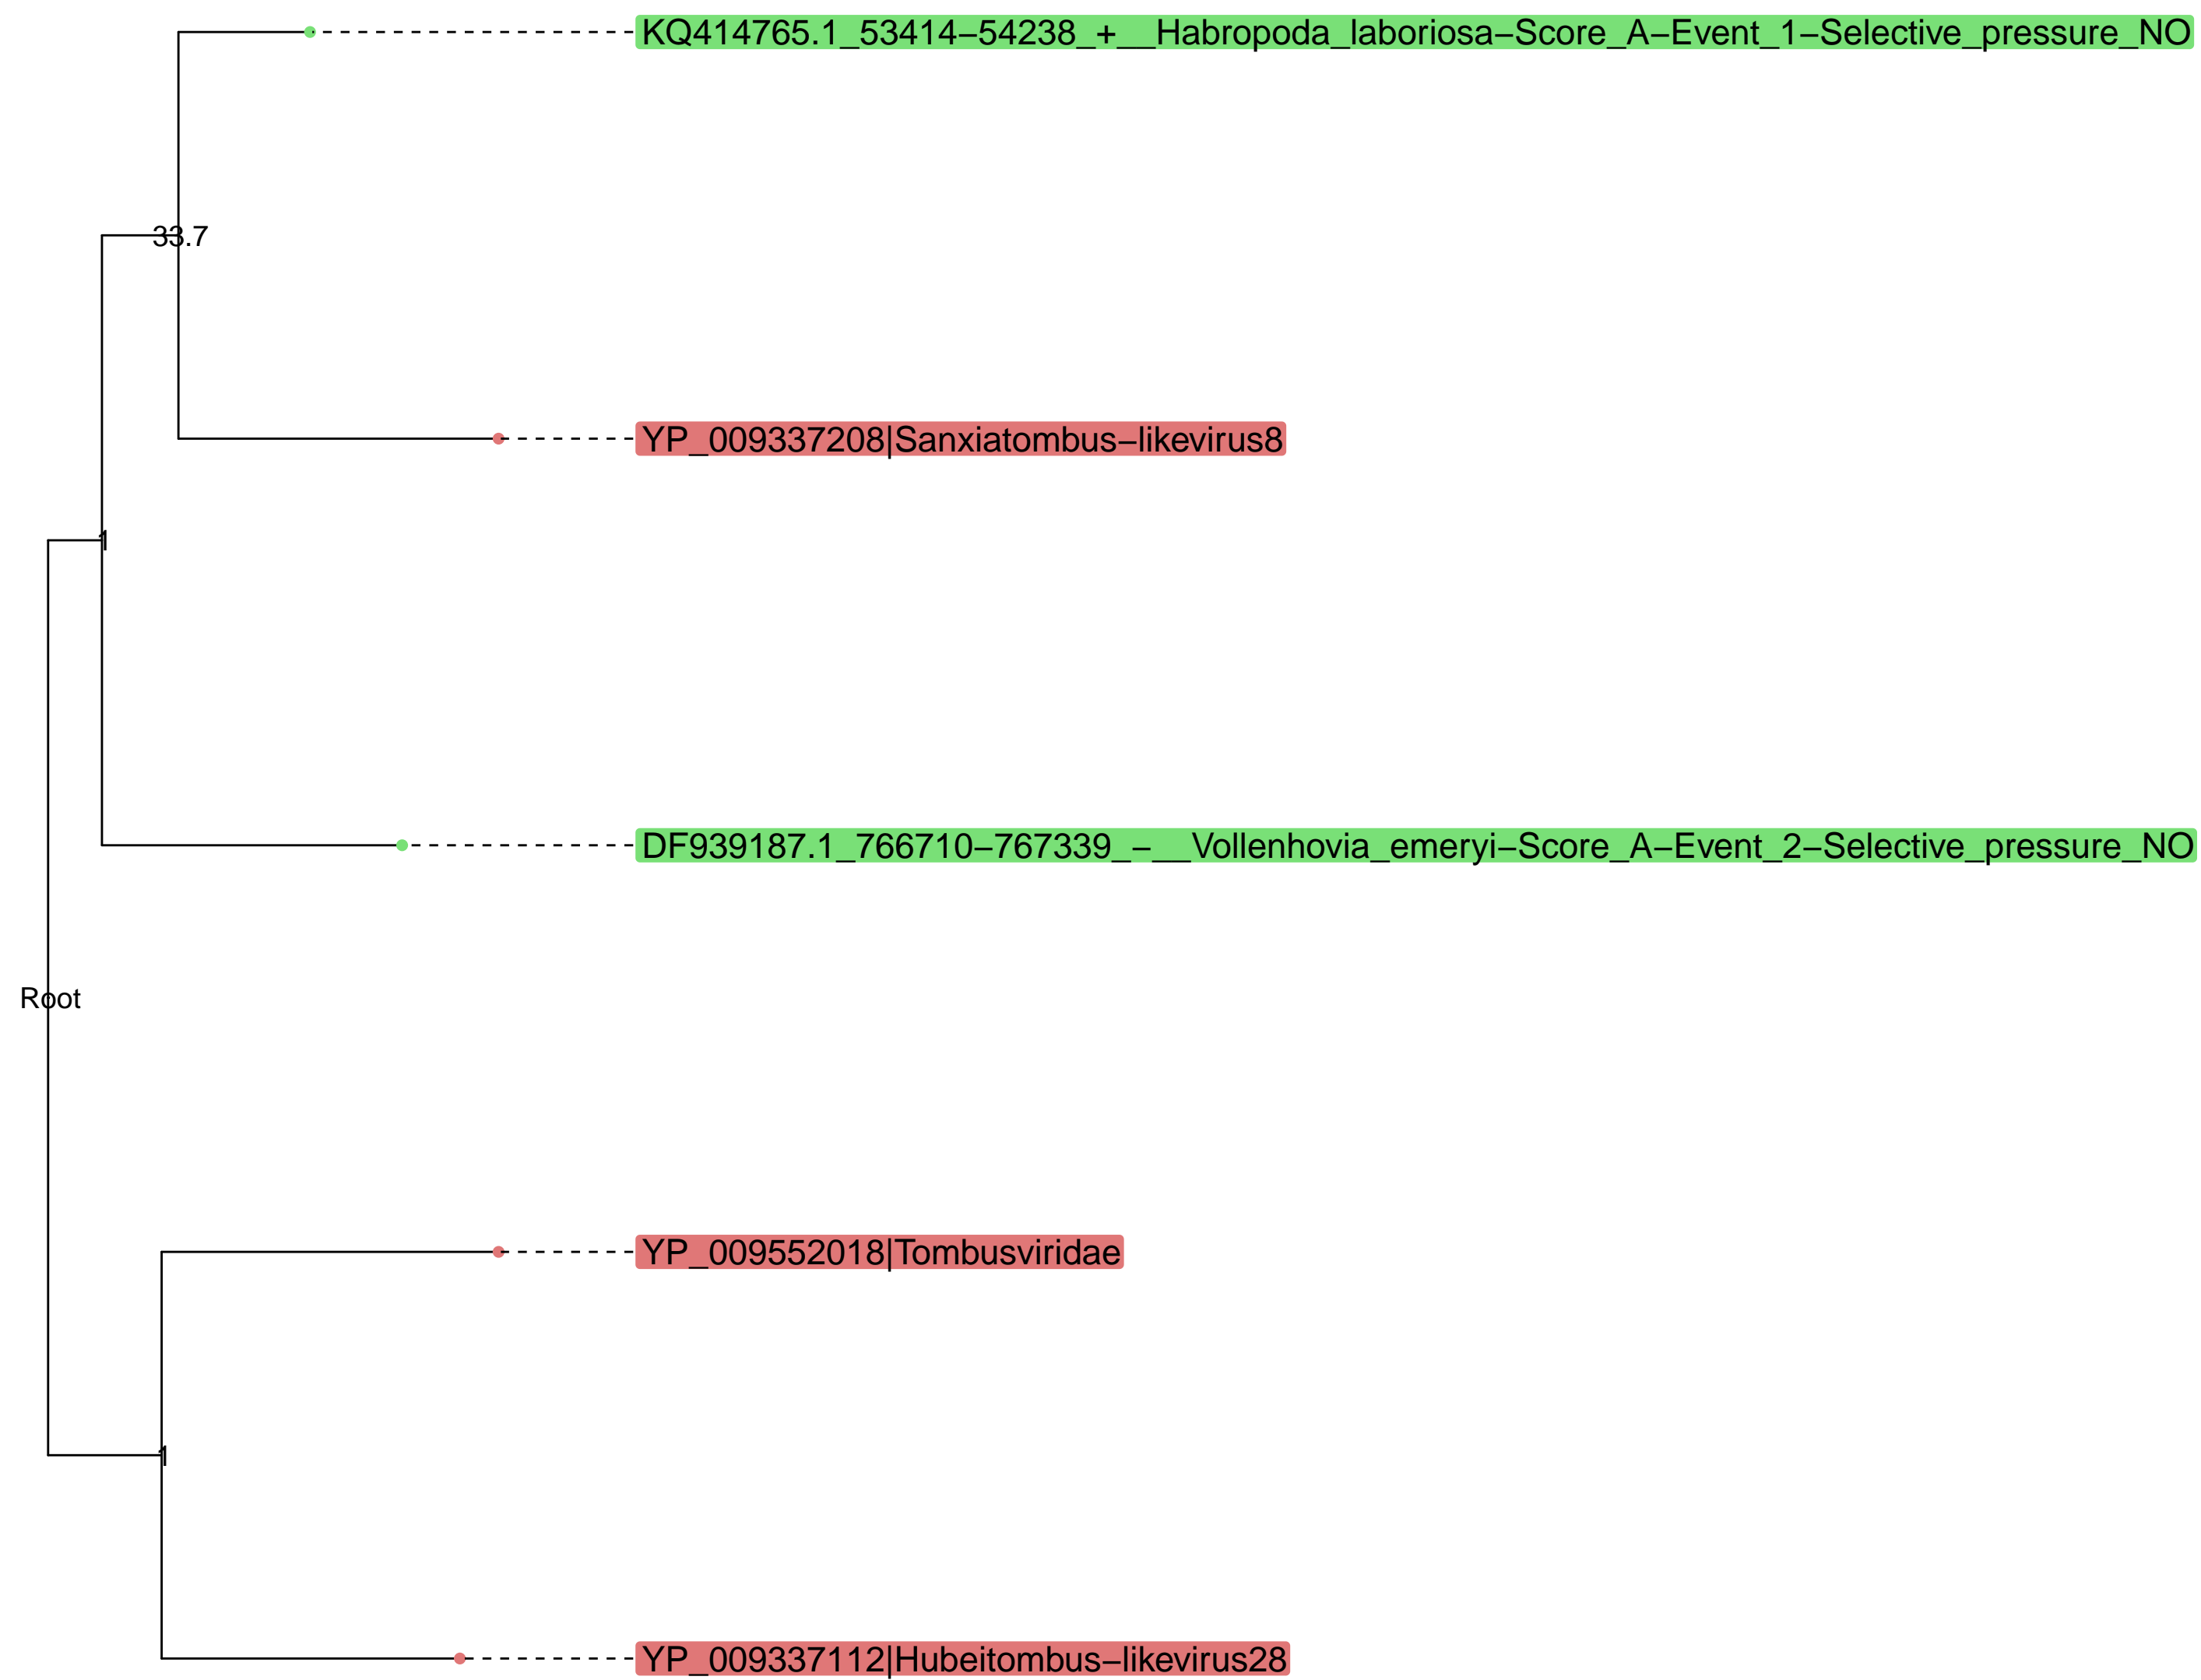

Cluster7388 – families involved : ['Asfarviridae', 'Poxviridae'] – putative protein : ['MyD116 homolog (Protein DP71L)']

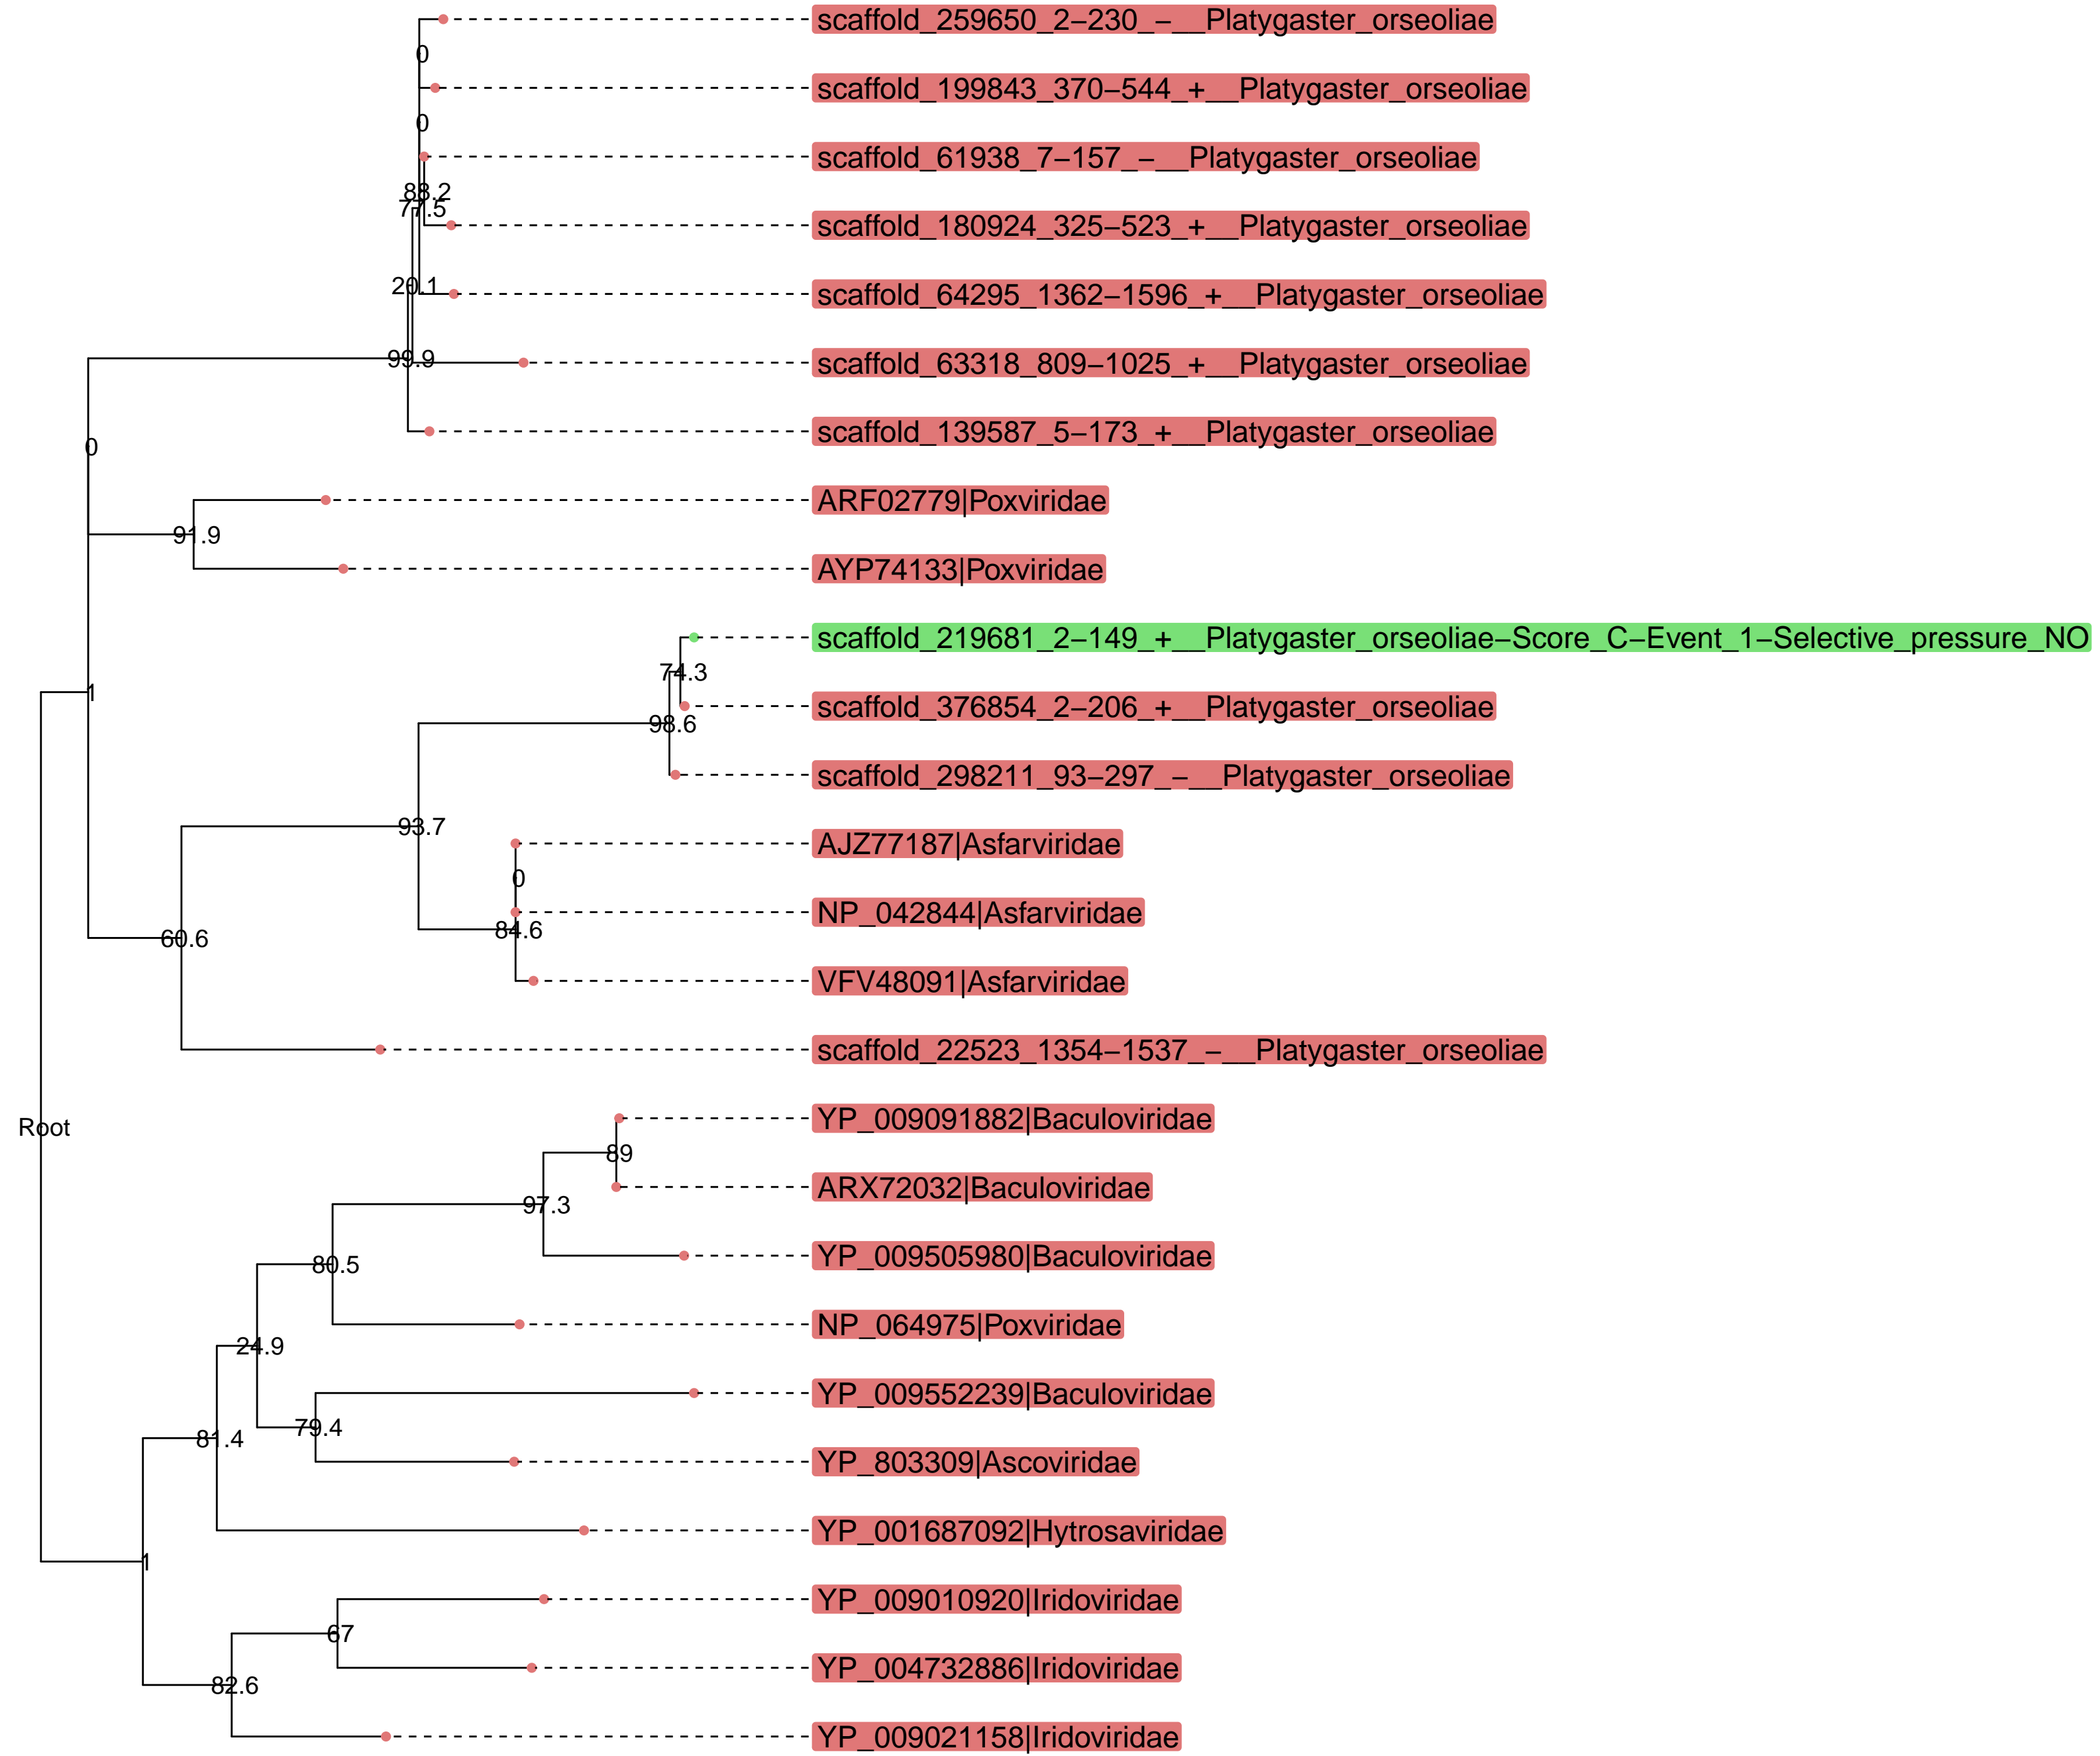

Cluster5650 – families involved : ['Baculoviridae'] – putative protein : ['Vef']

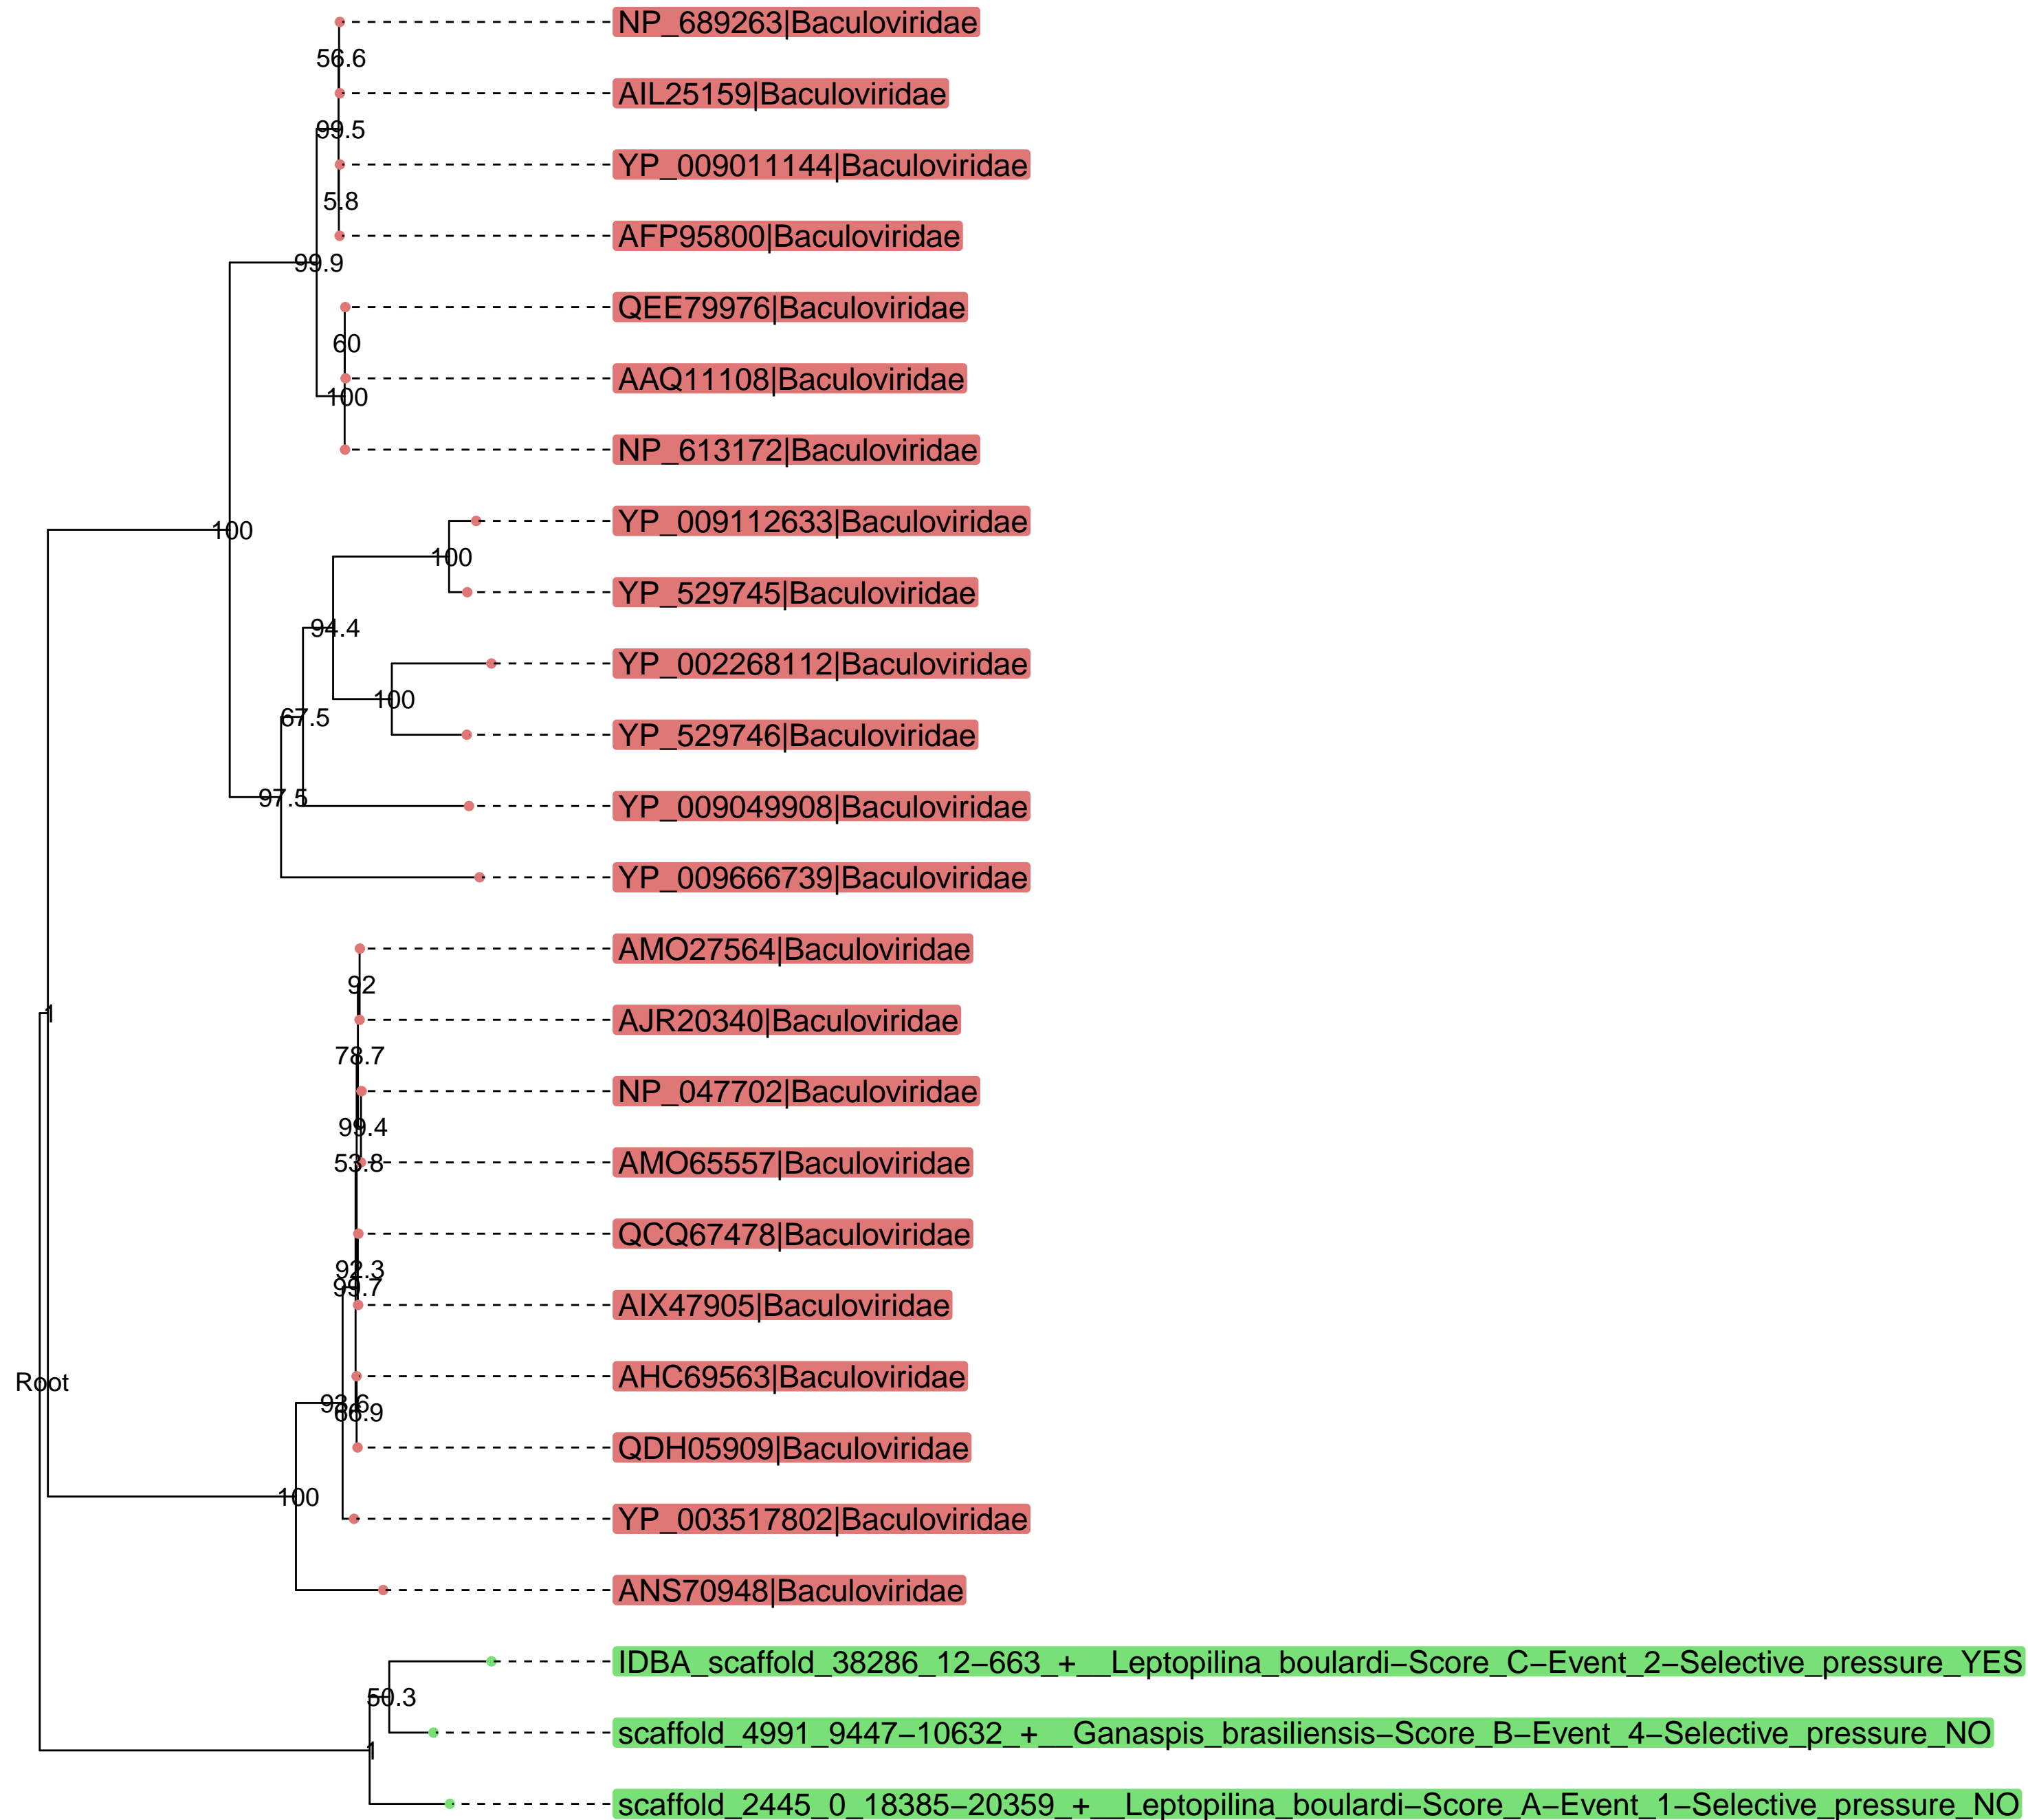

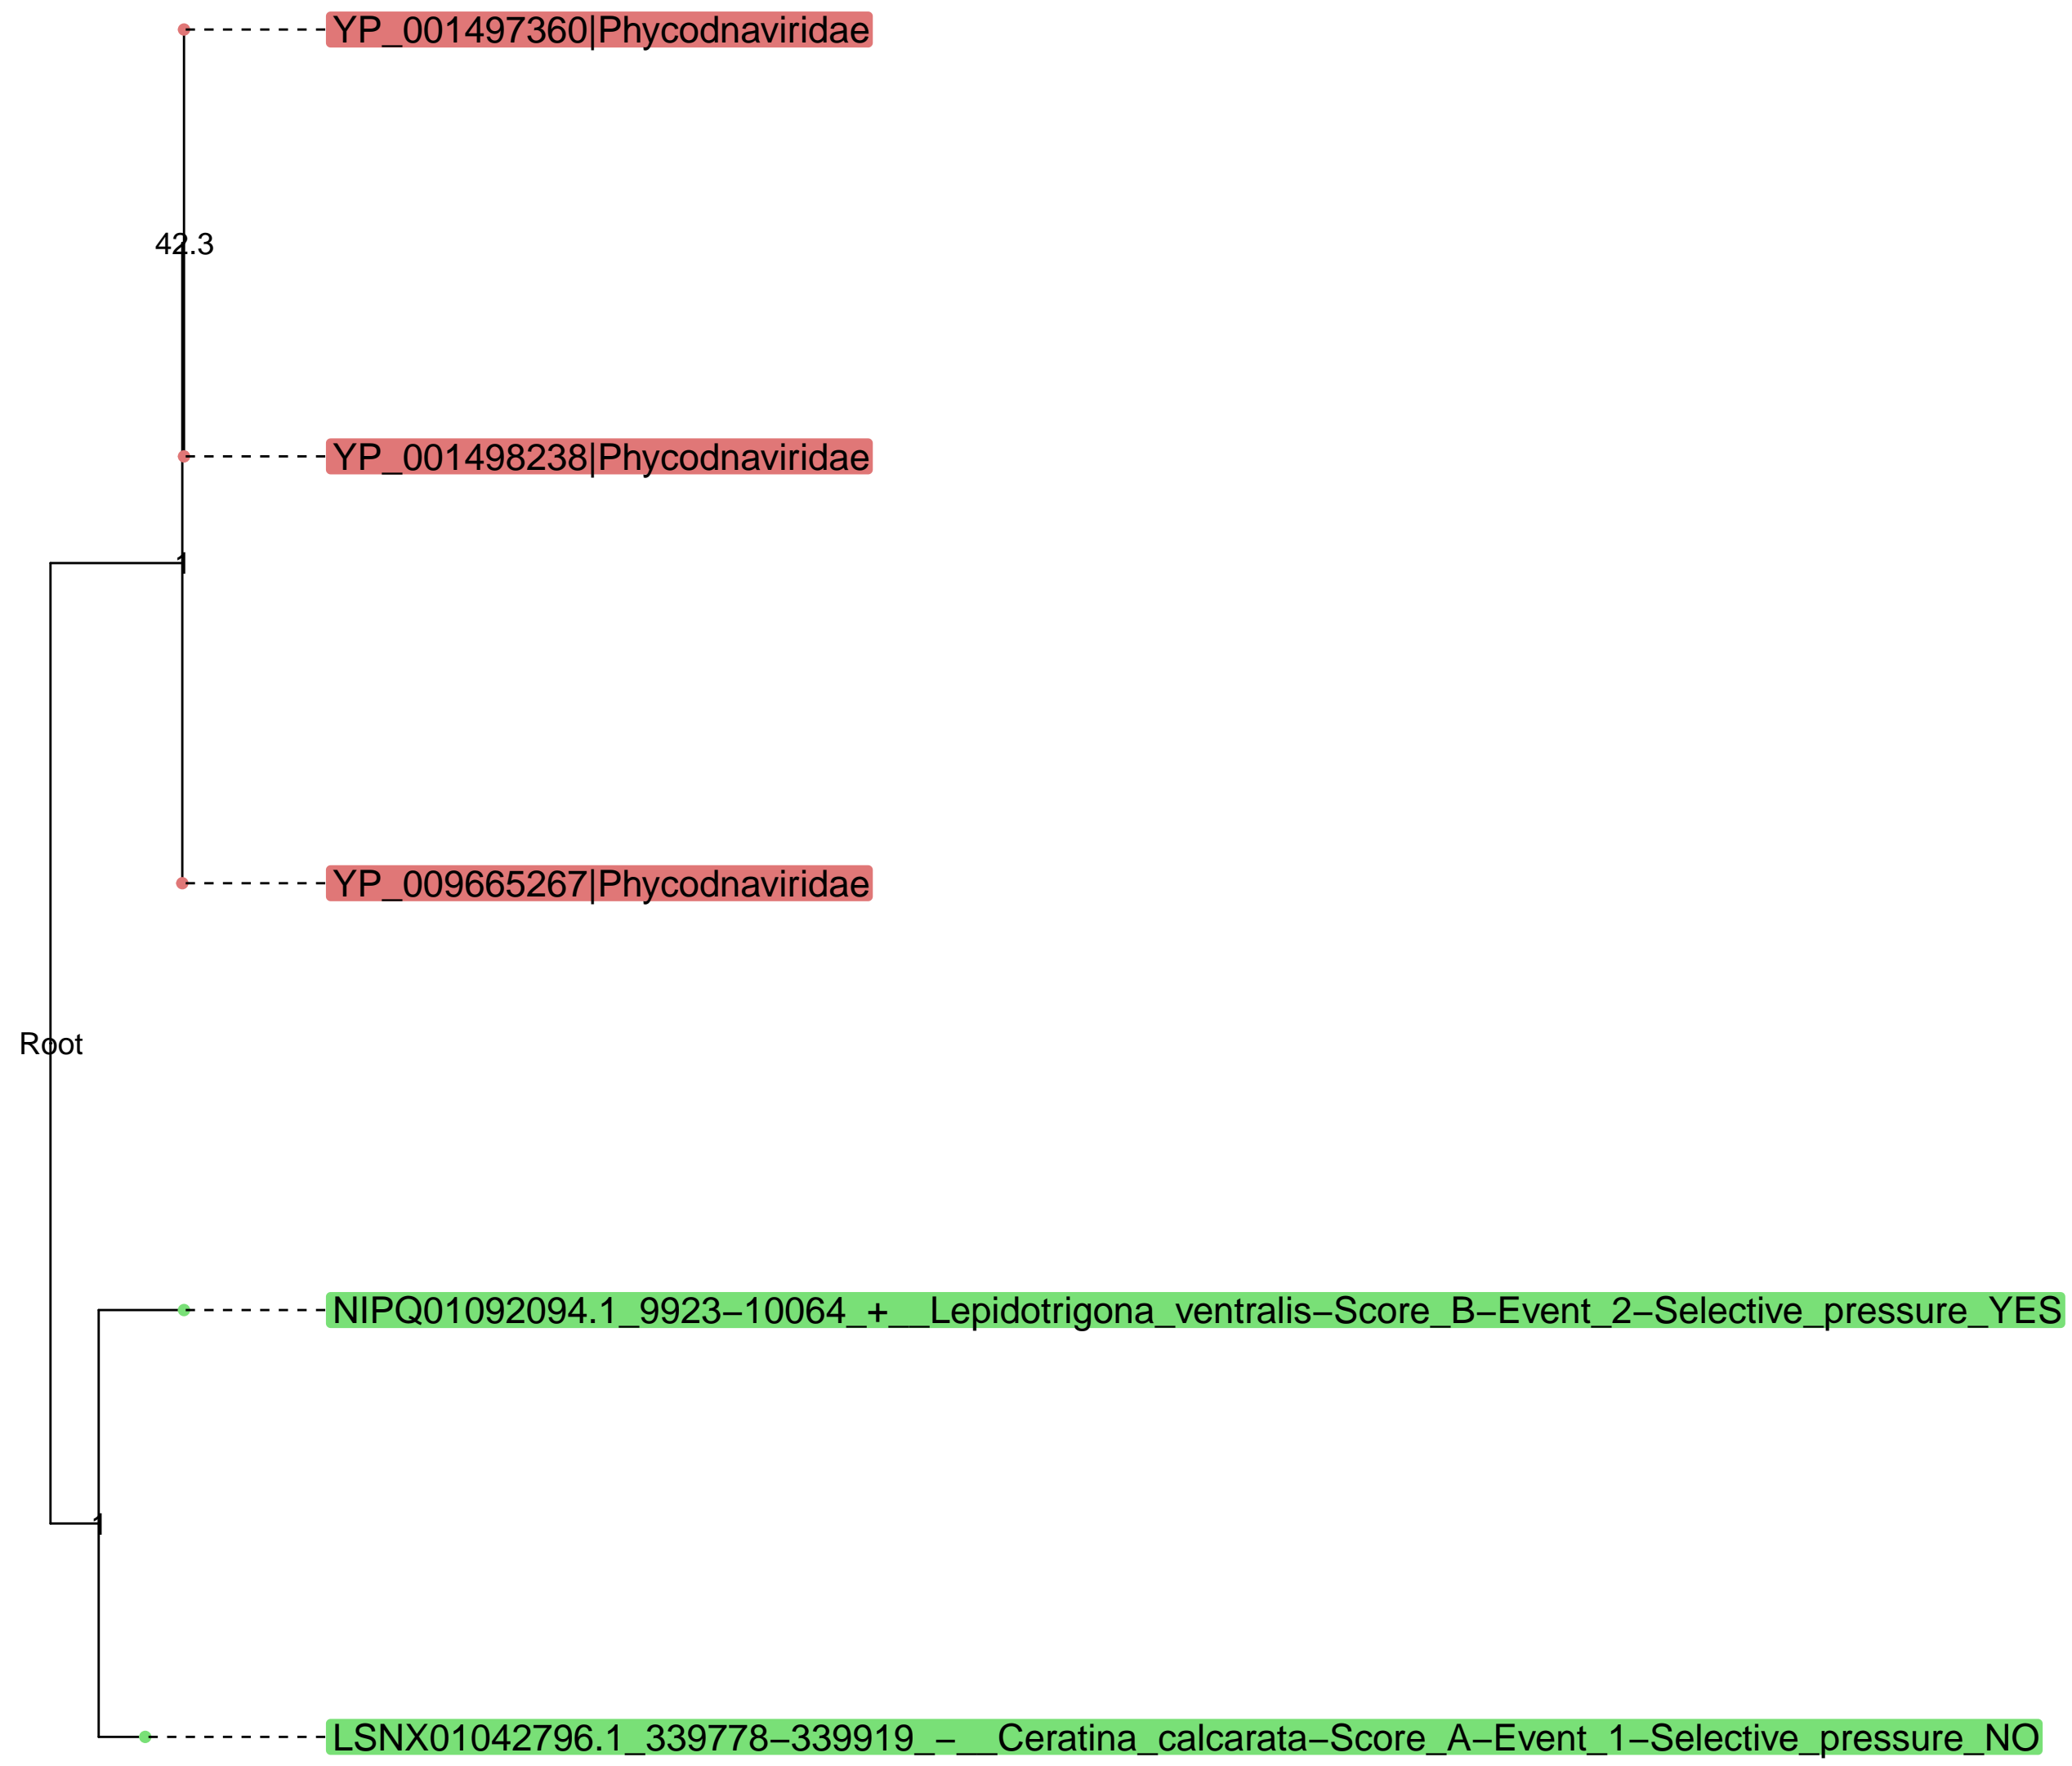

Cluster4884 – families involved : ['Phasmaviridae'] – putative protein : ['Glycoprotein']

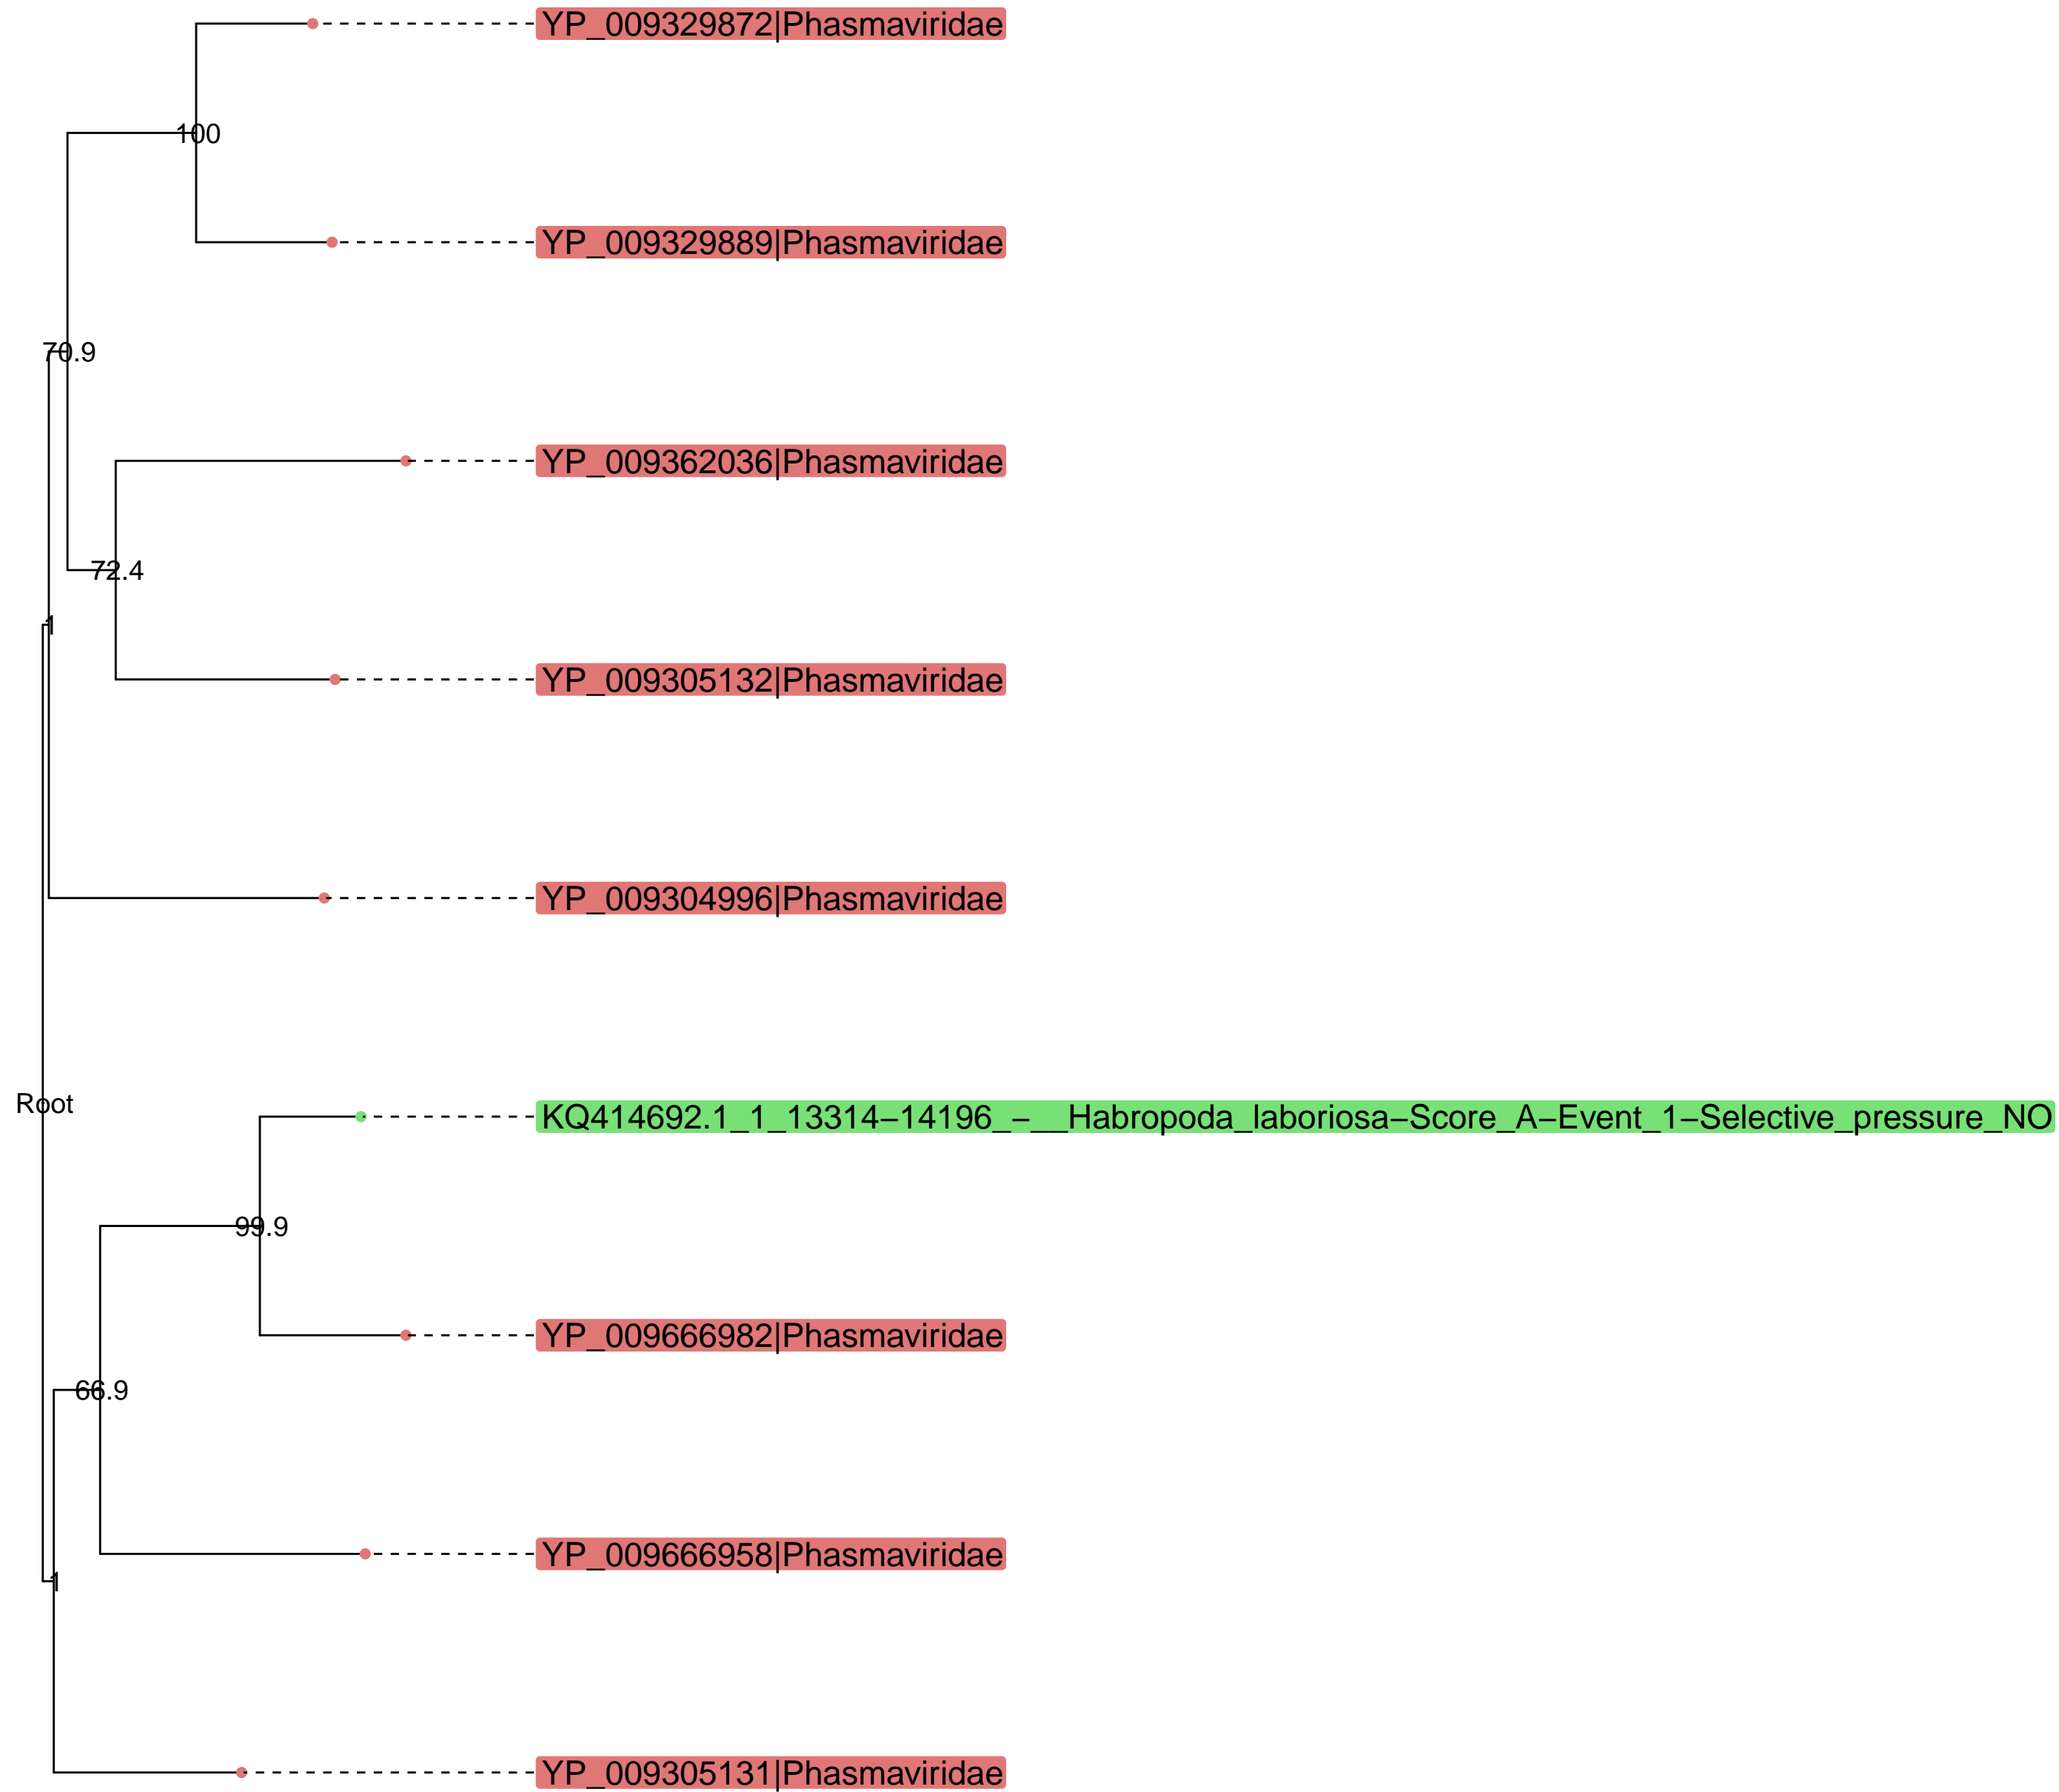

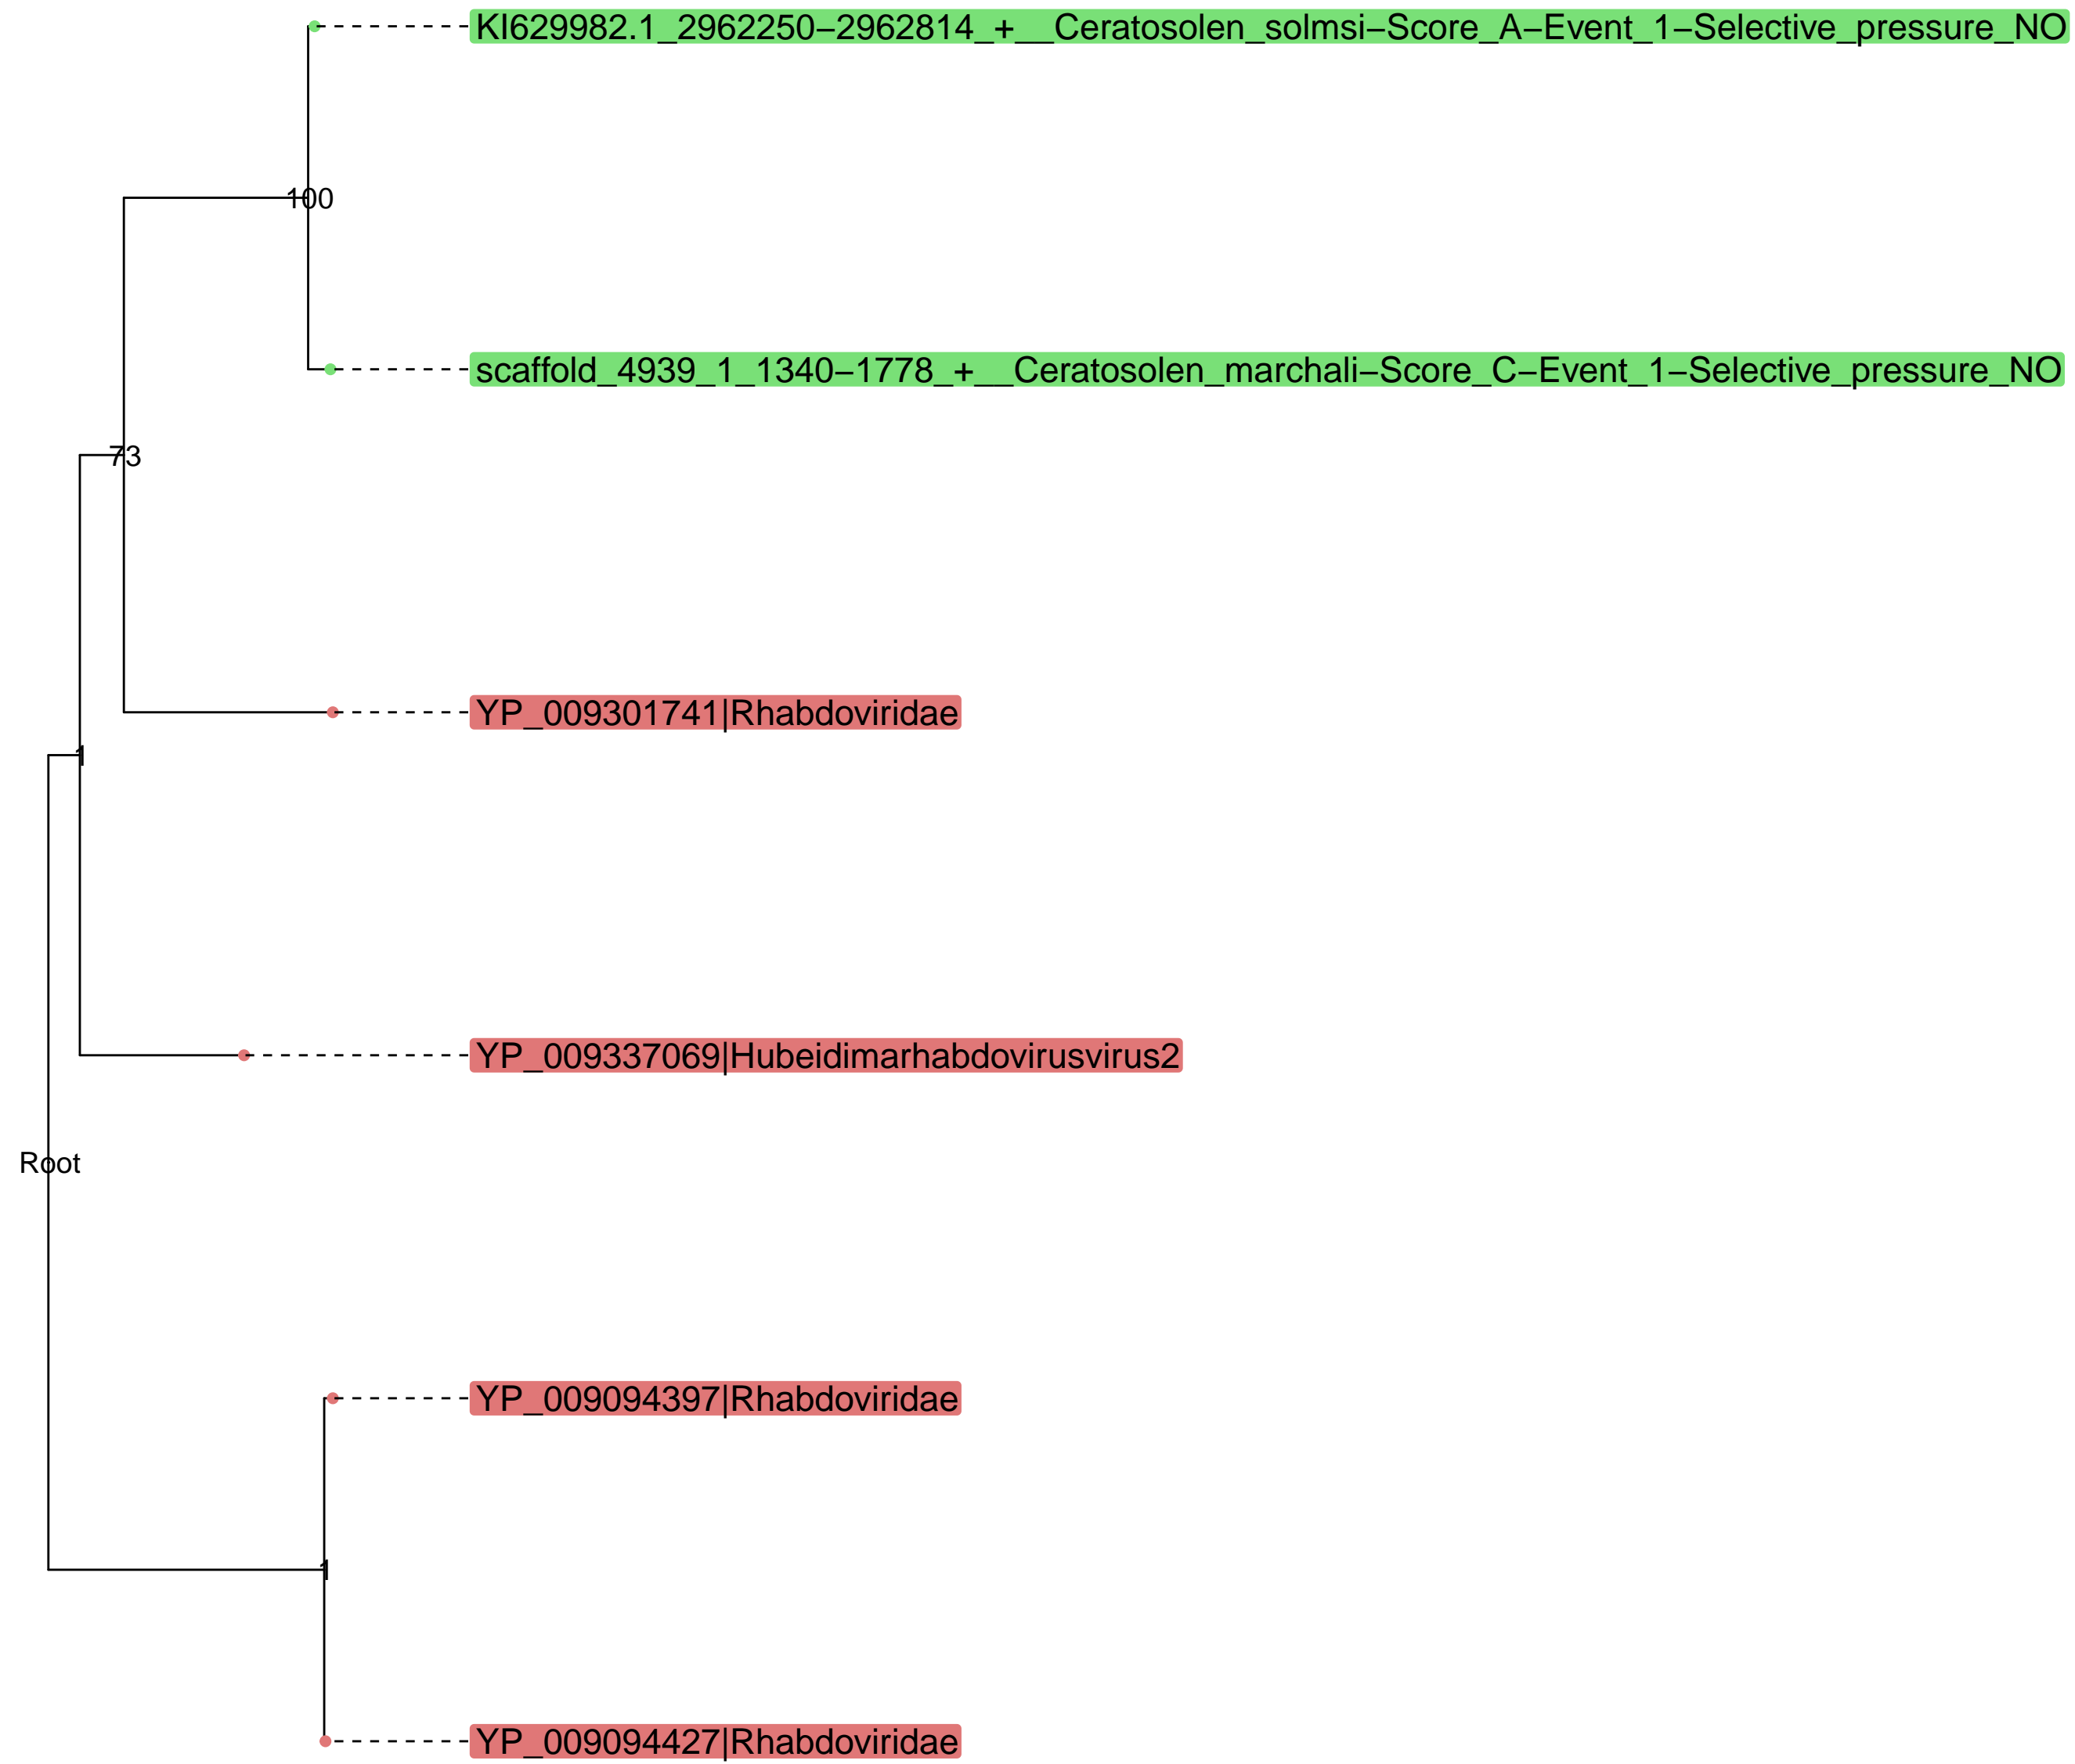

Cluster4230 – families involved : ['Unknown'] – putative protein : ['Family of unknown function (DUF5510)']

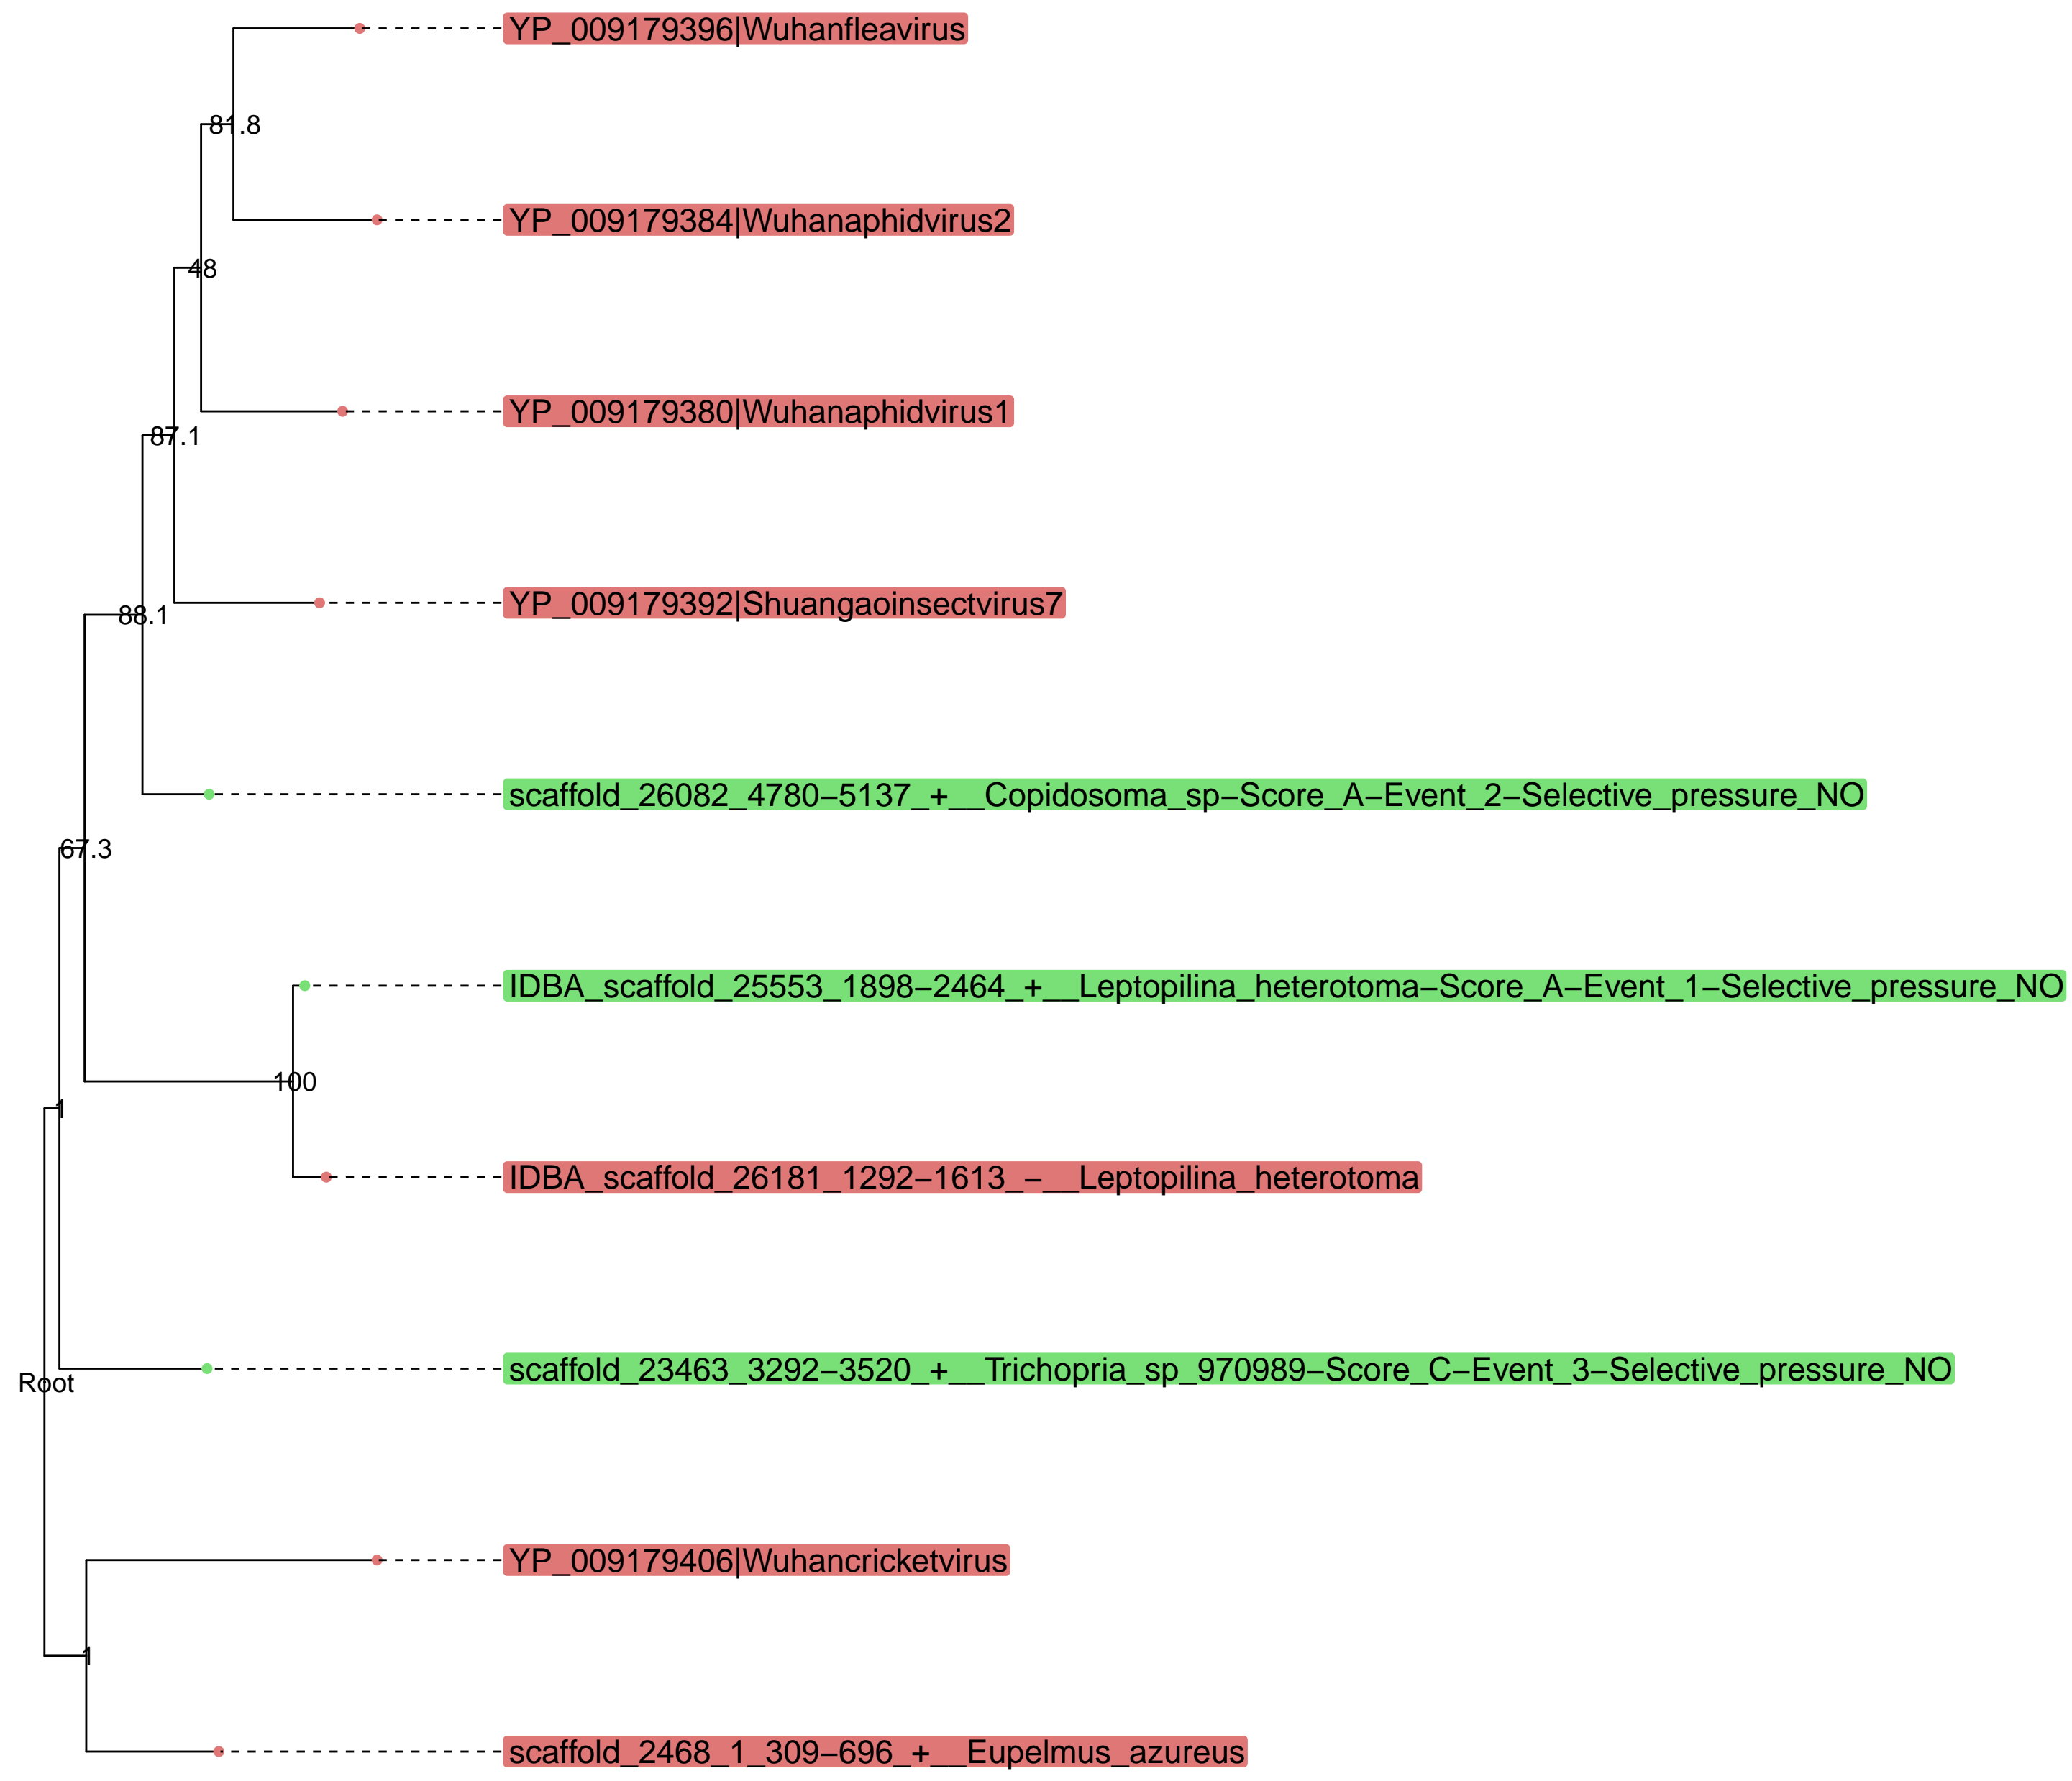

Cluster3516 – families involved : ['Parvoviridae'] – putative protein : ['Non-structural protein 2']

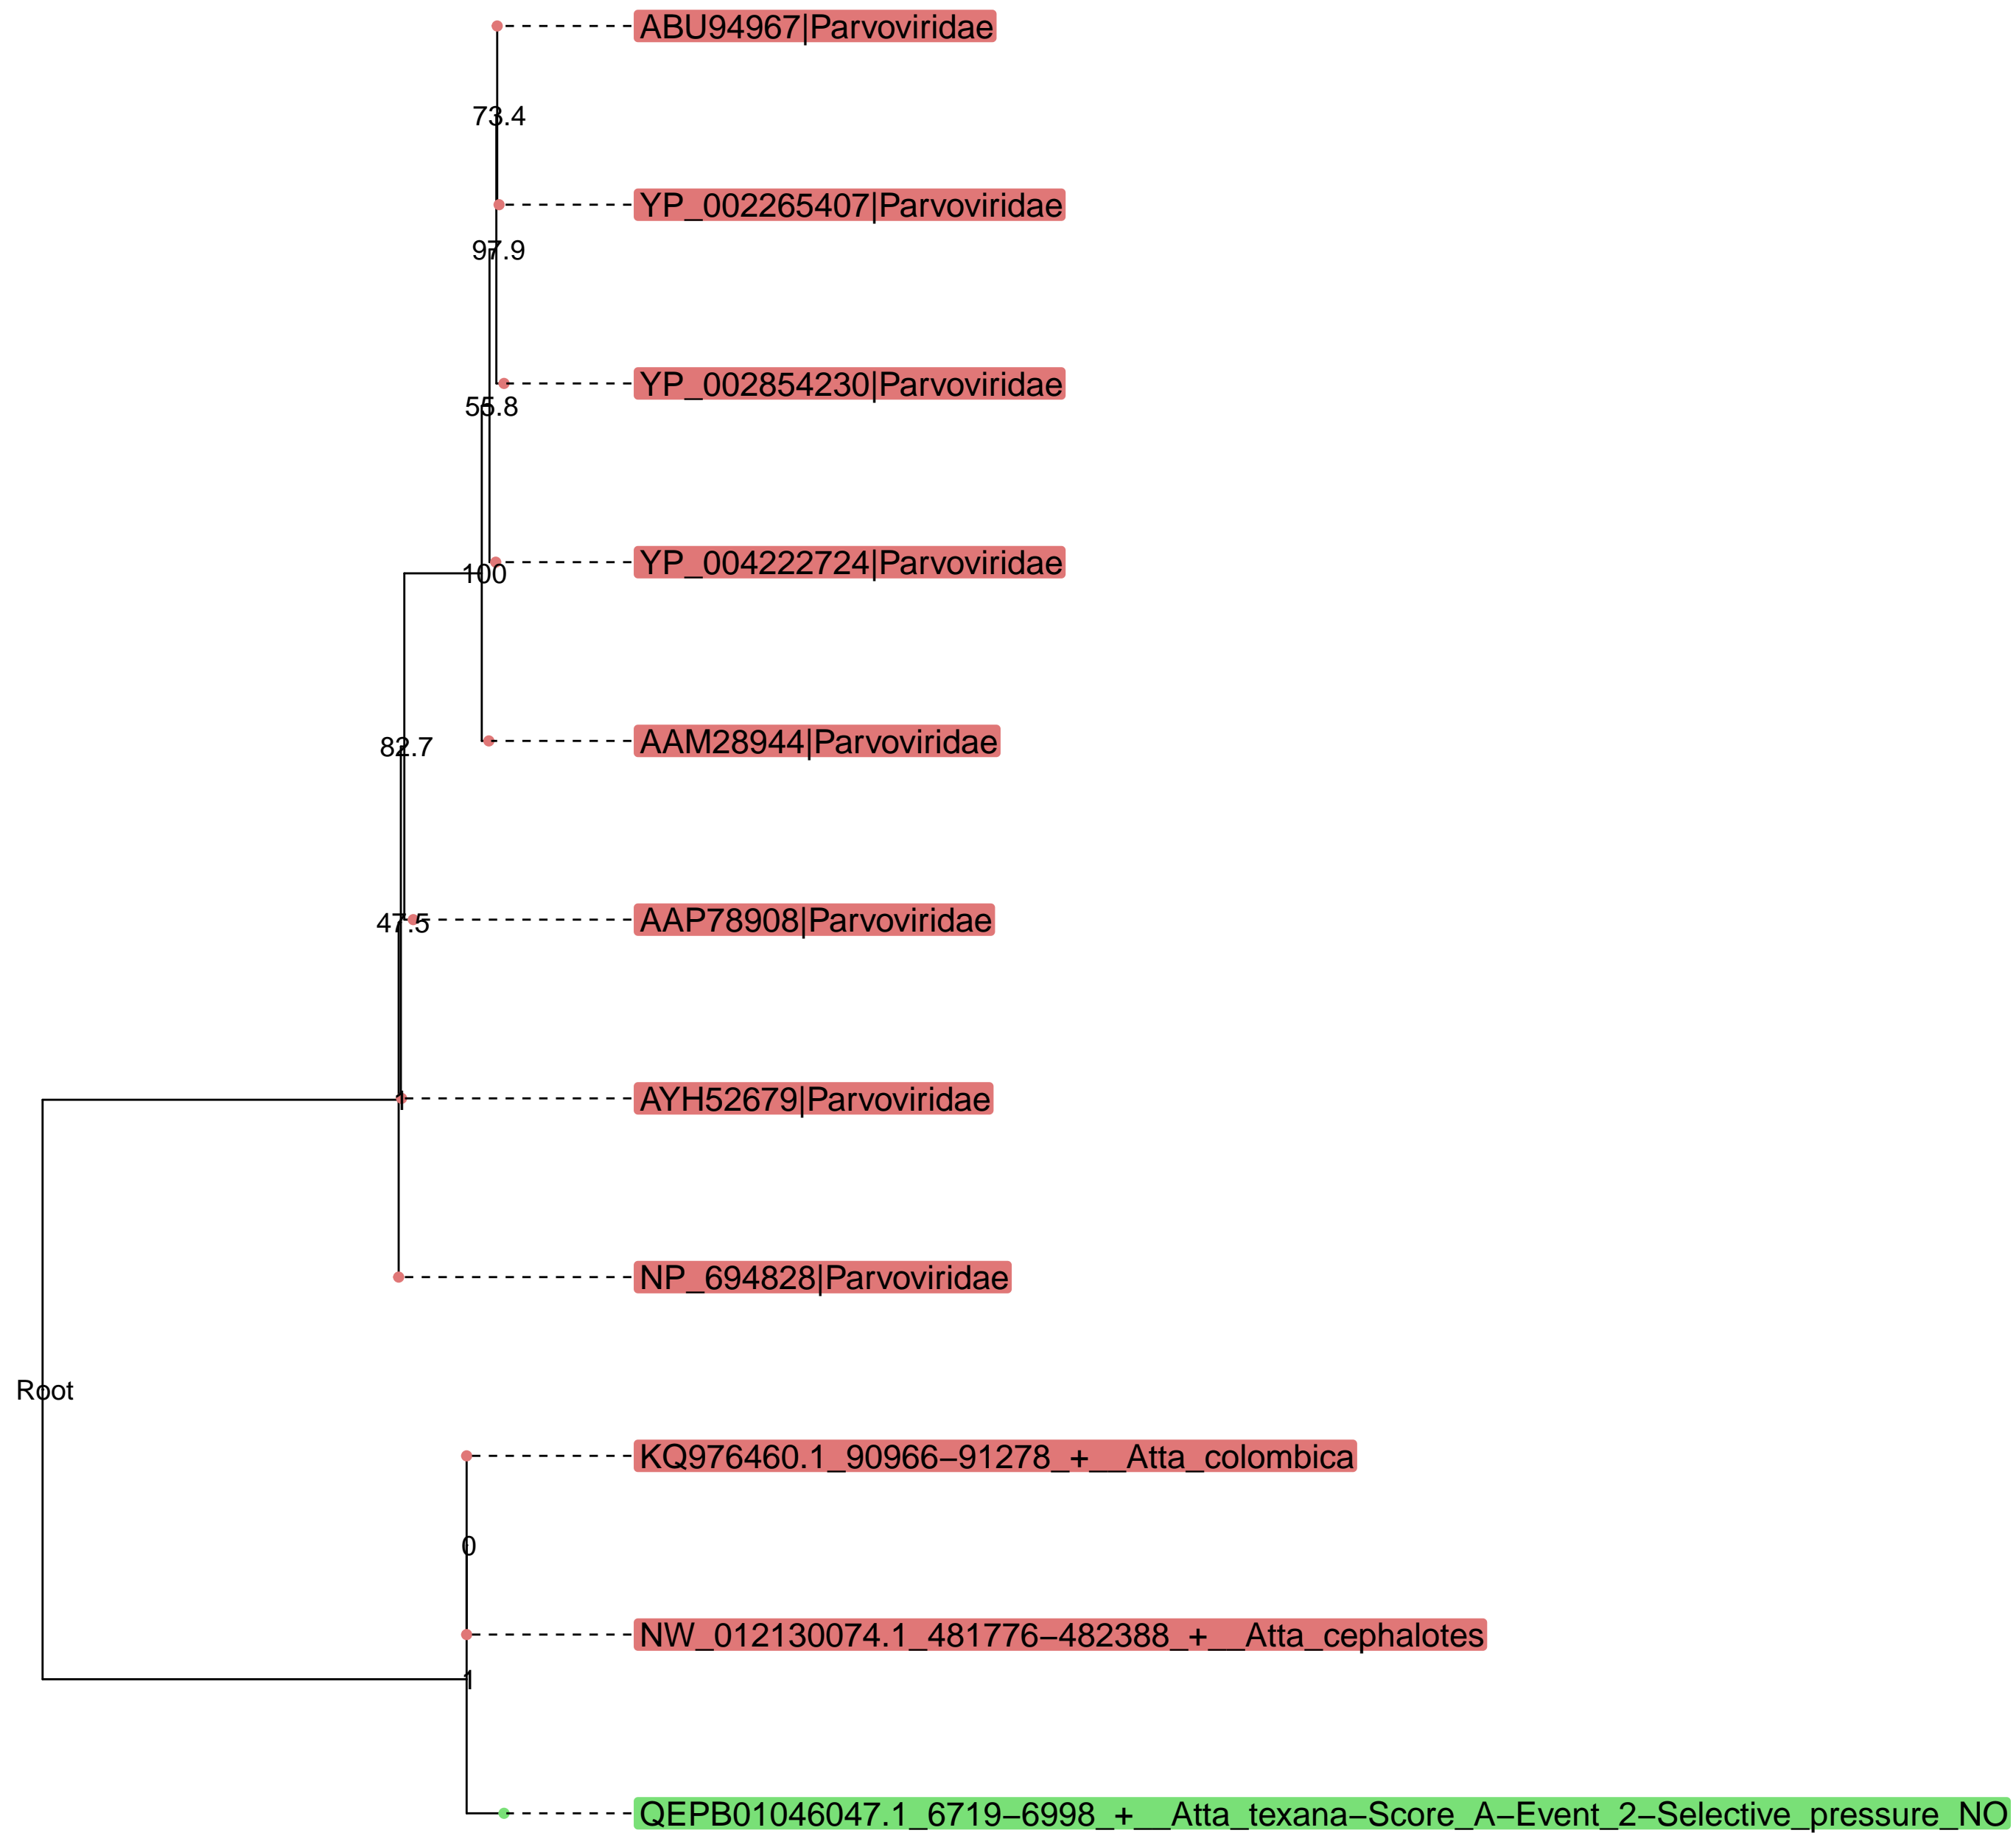



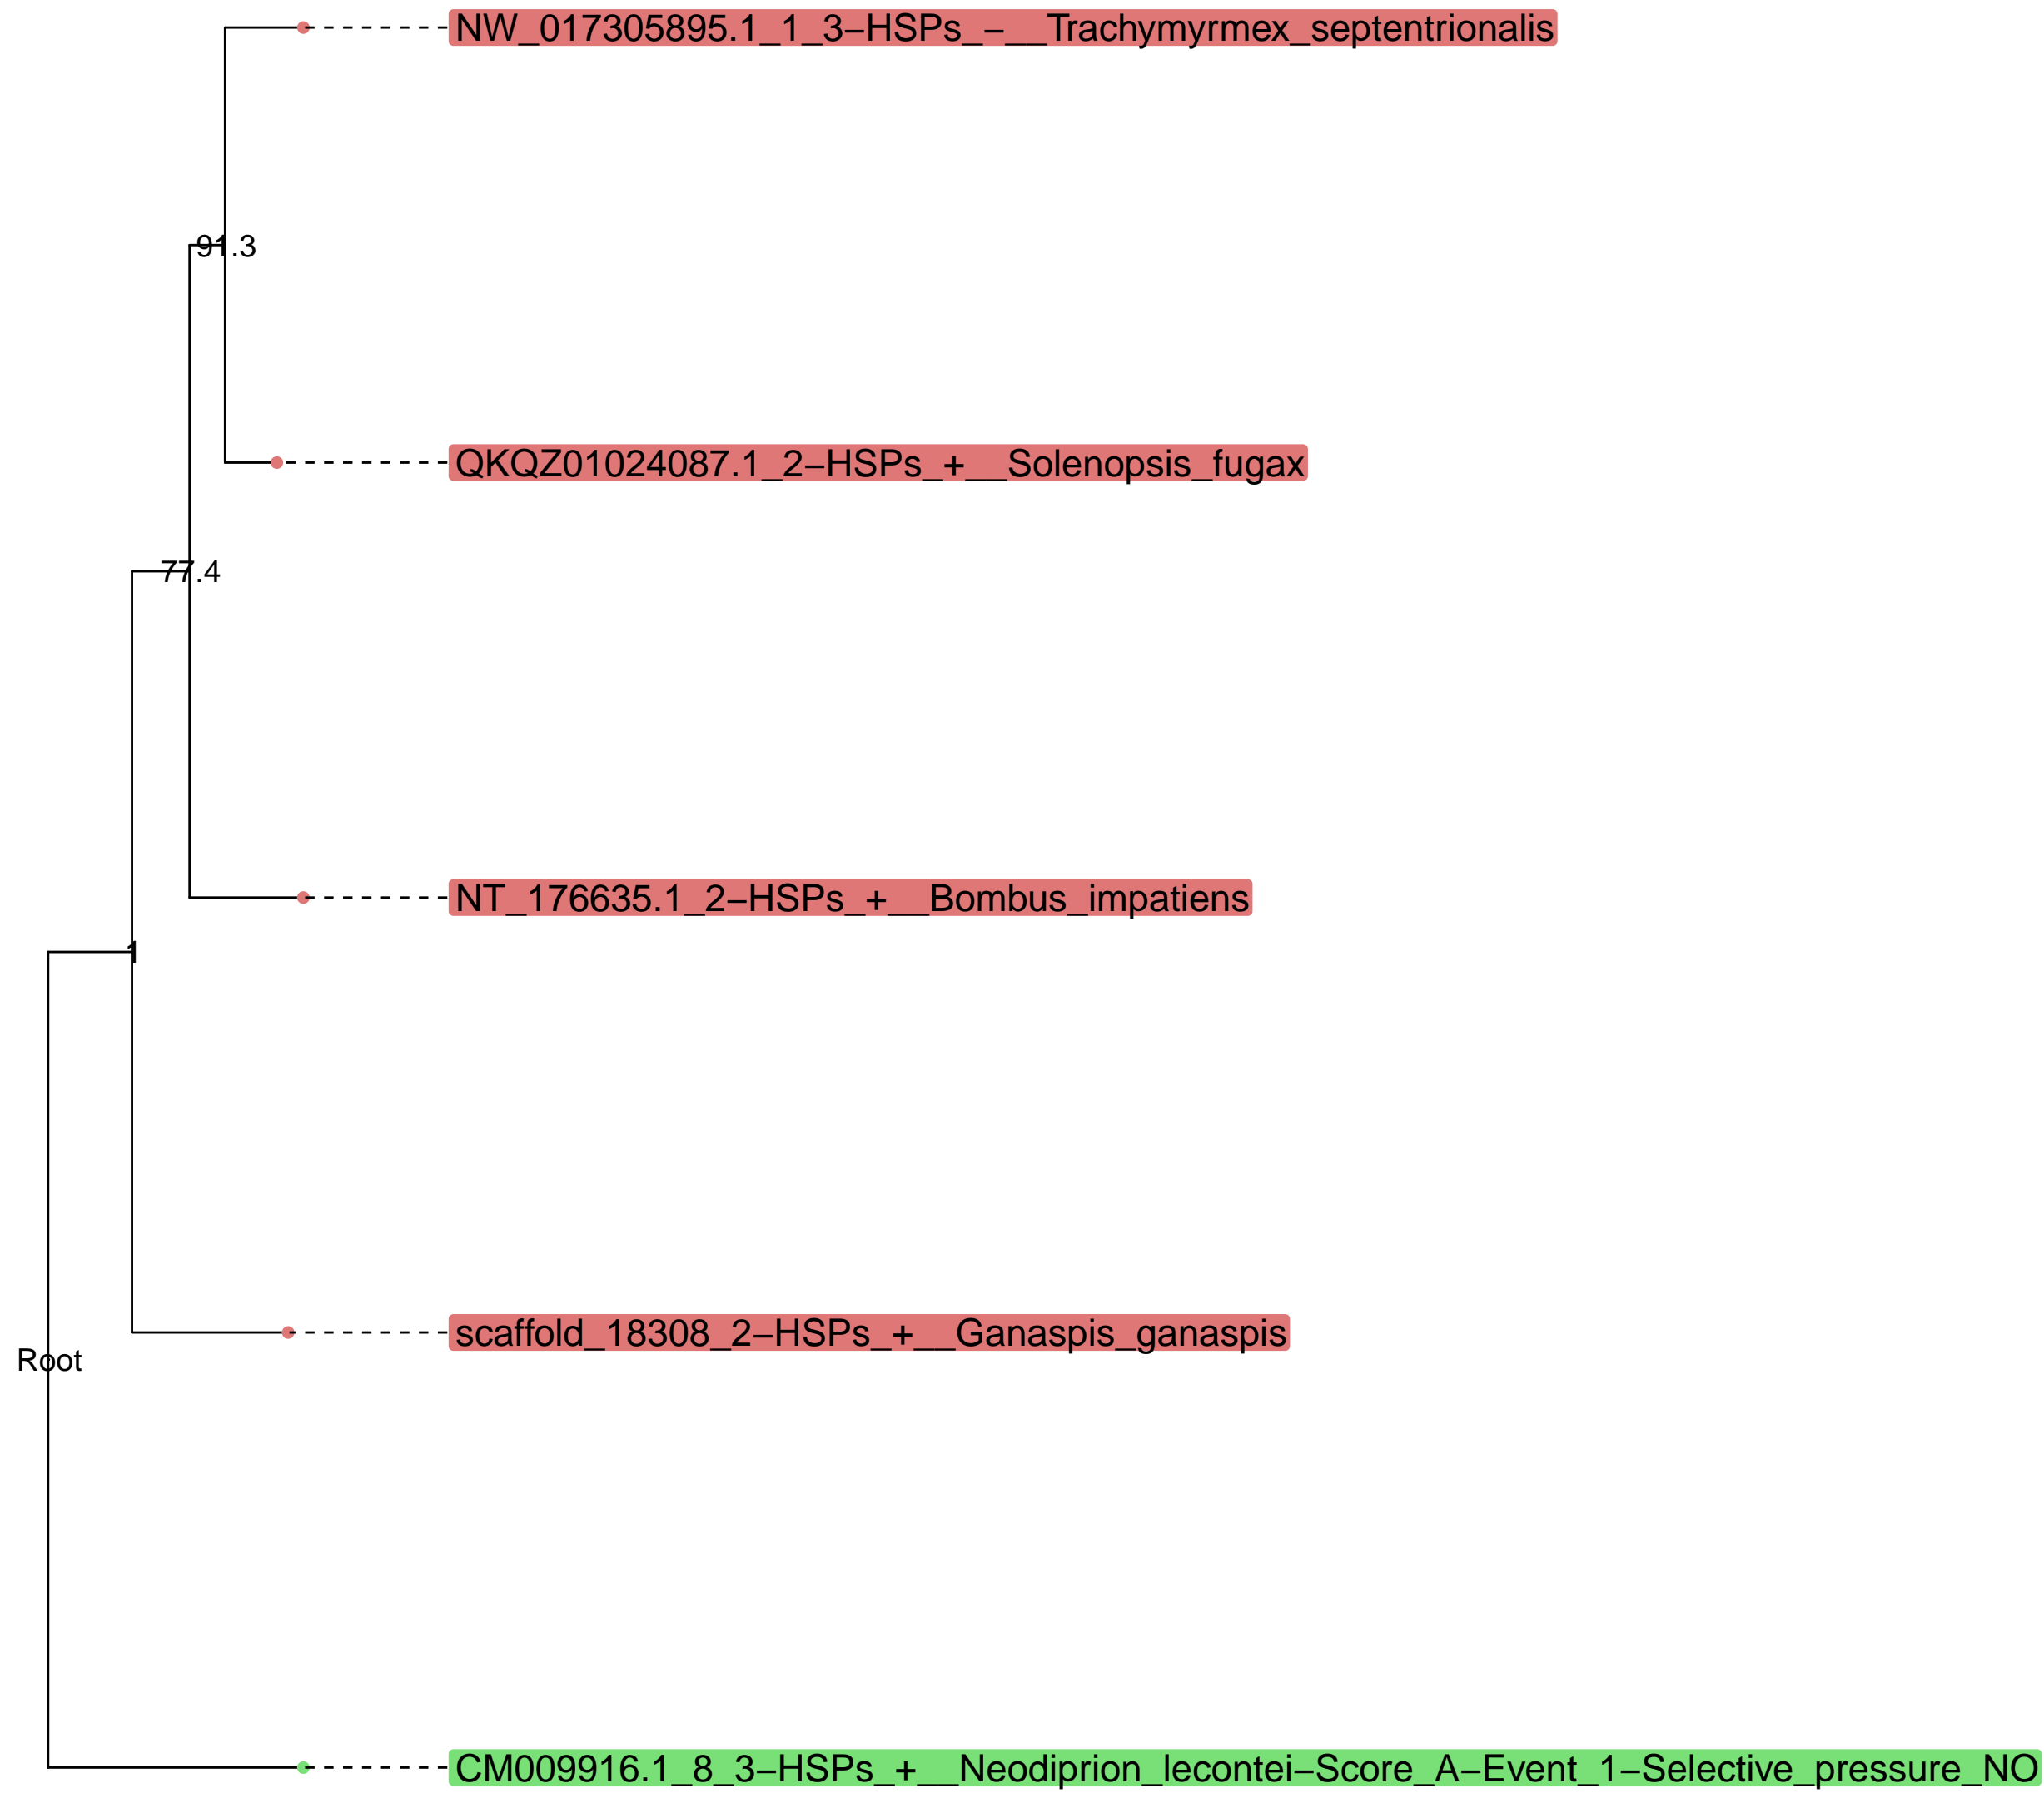

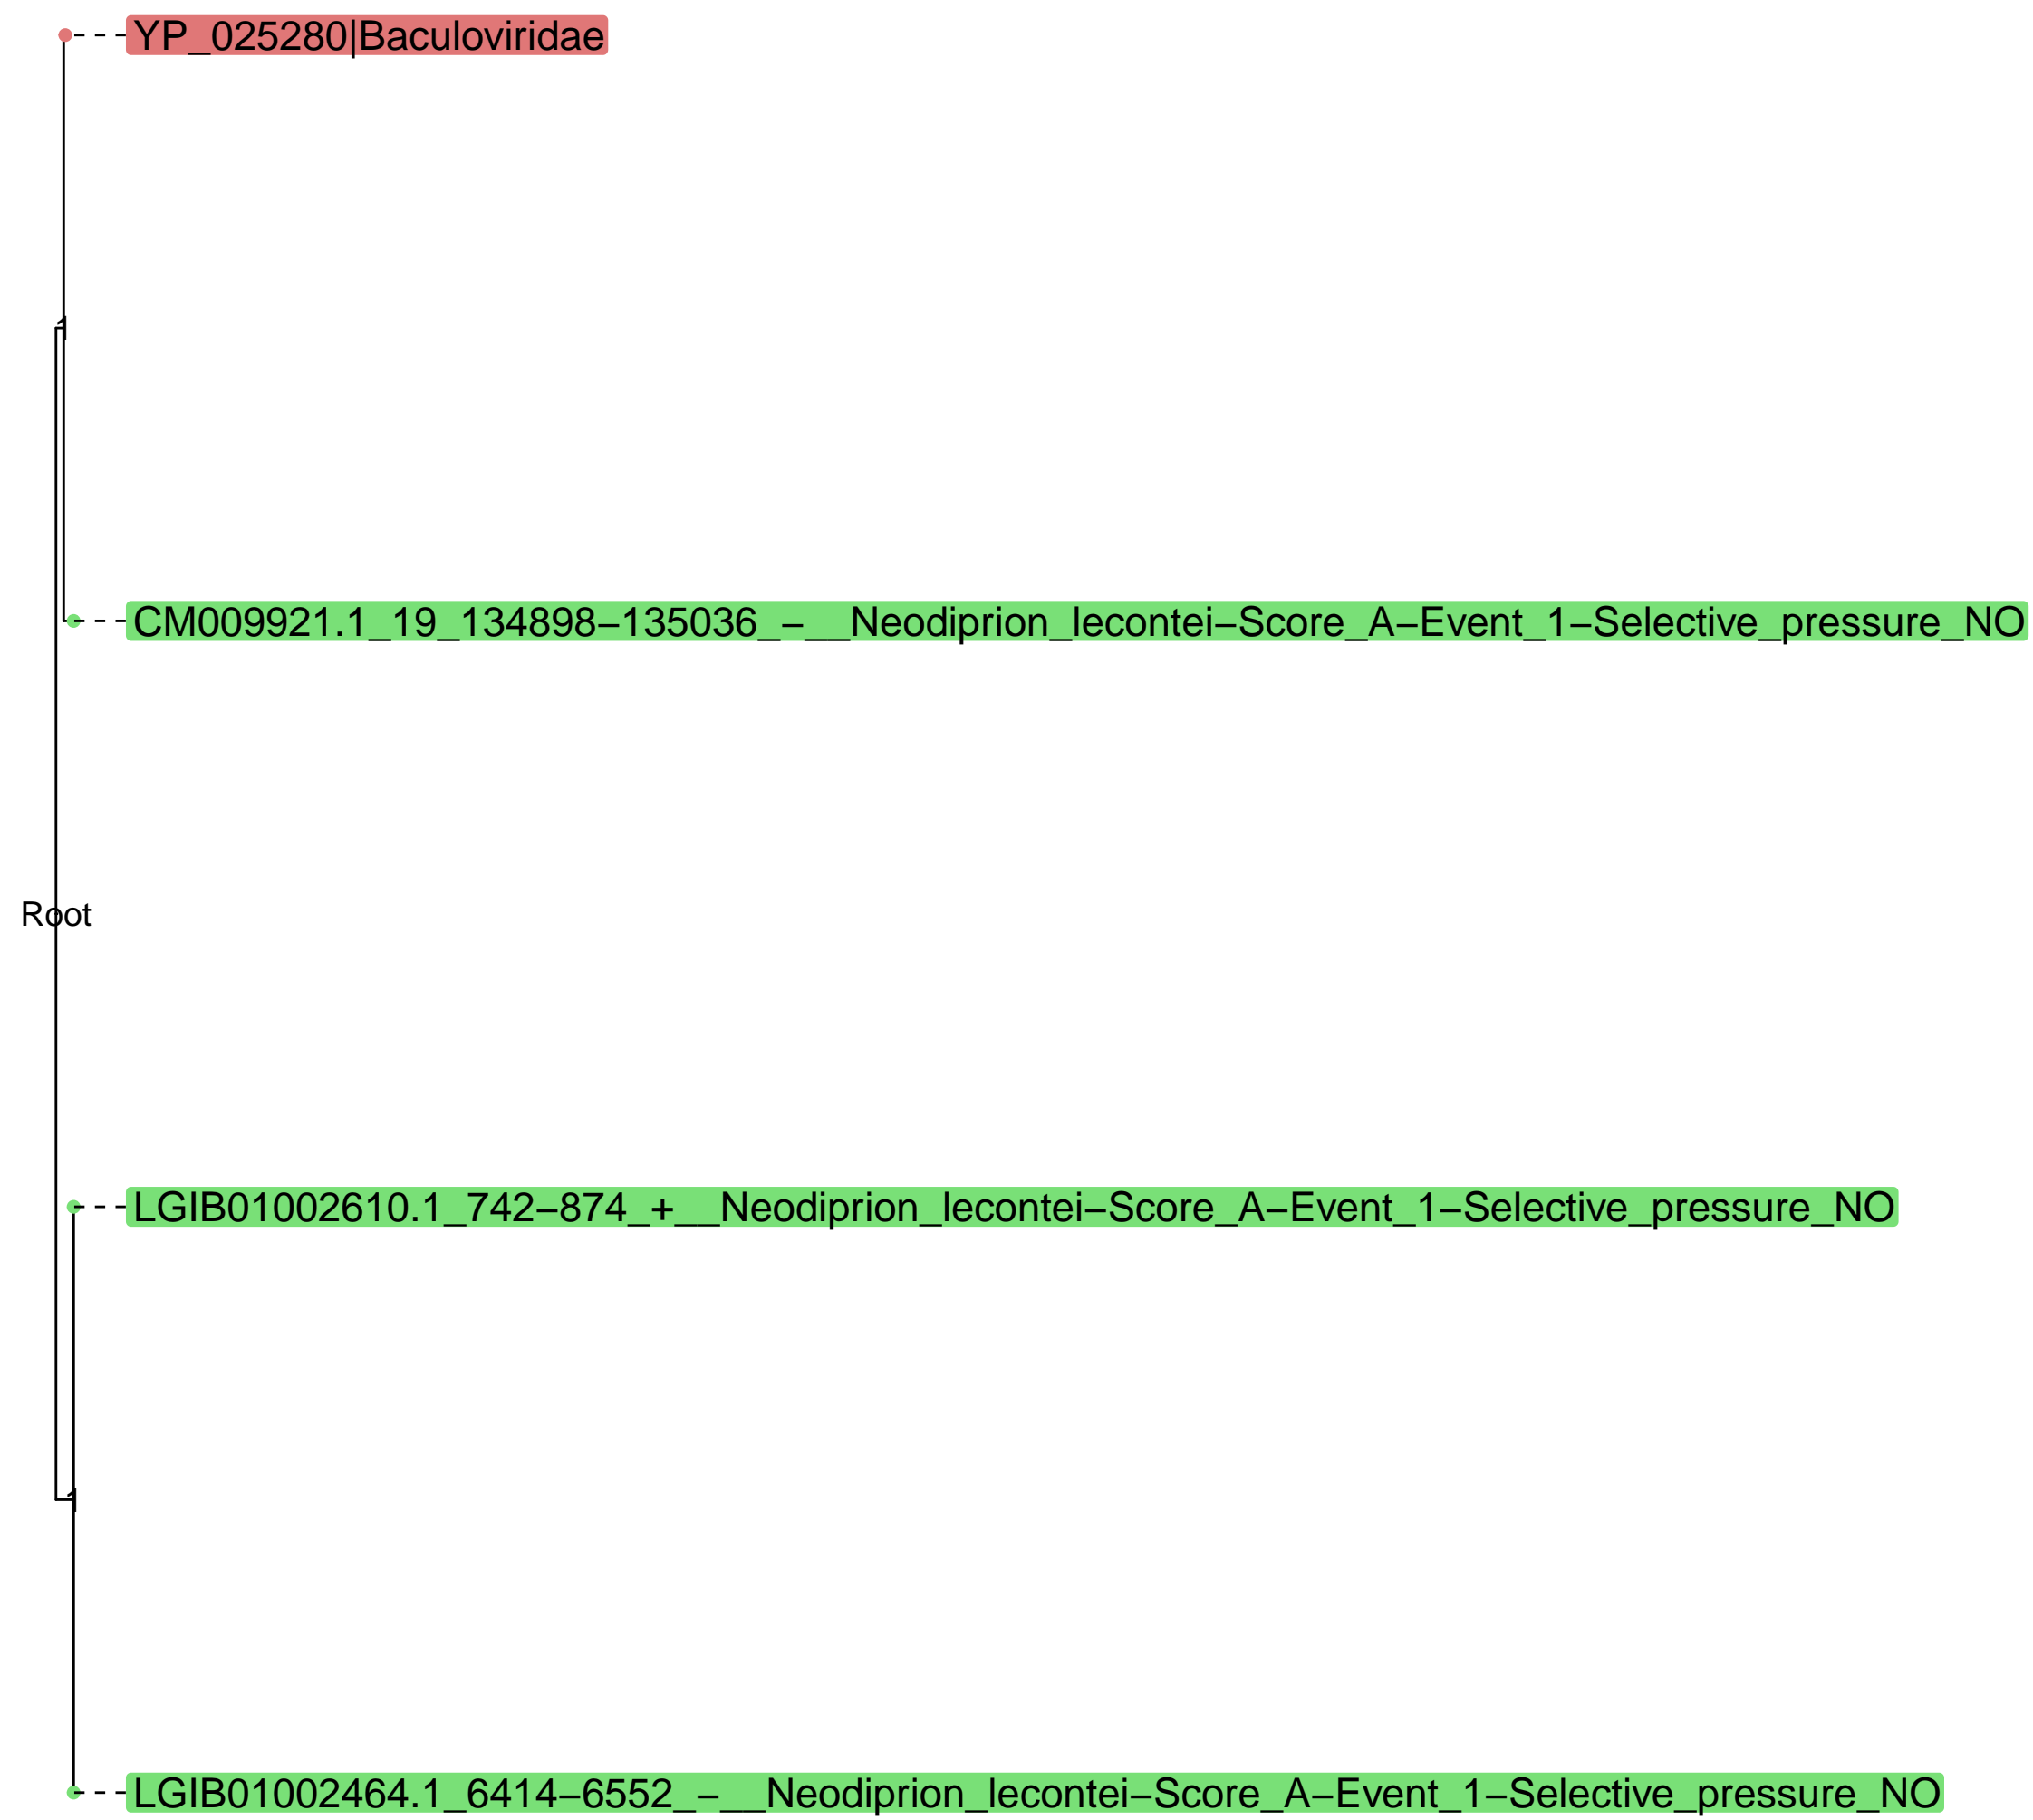

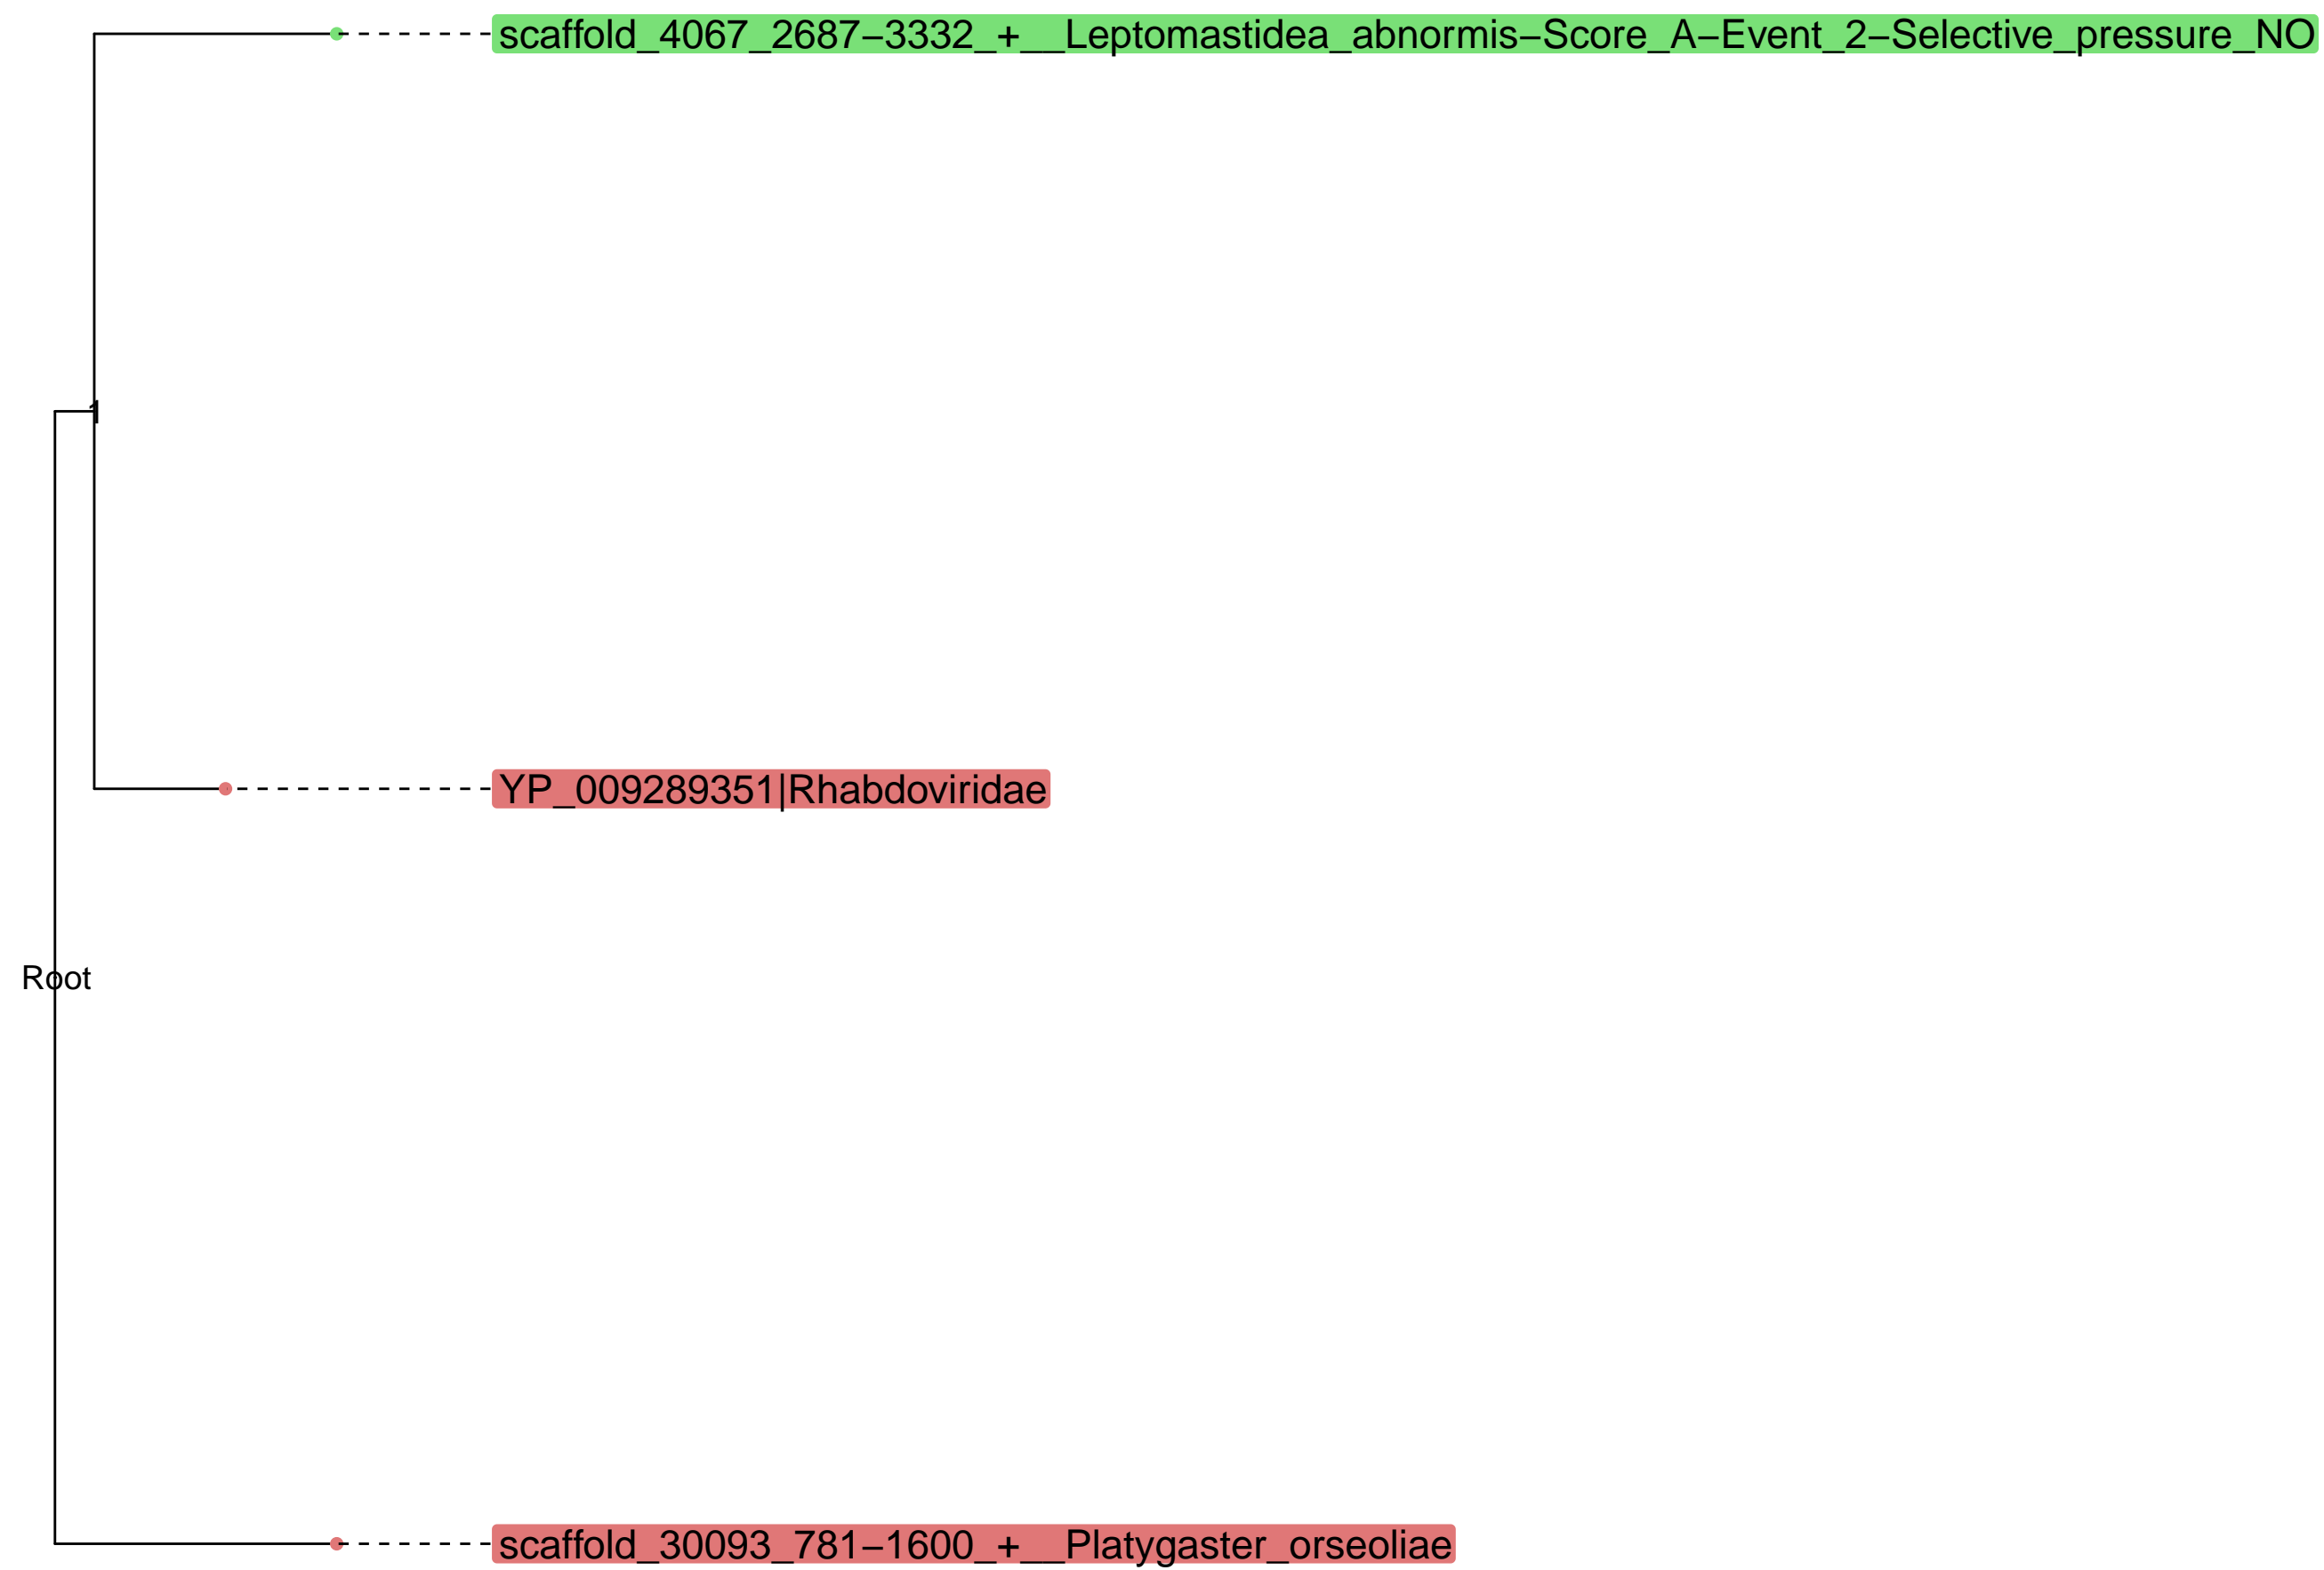

Cluster294 - families involved: ['Genomoviridae'] - putative protein: ['Capsid protein']

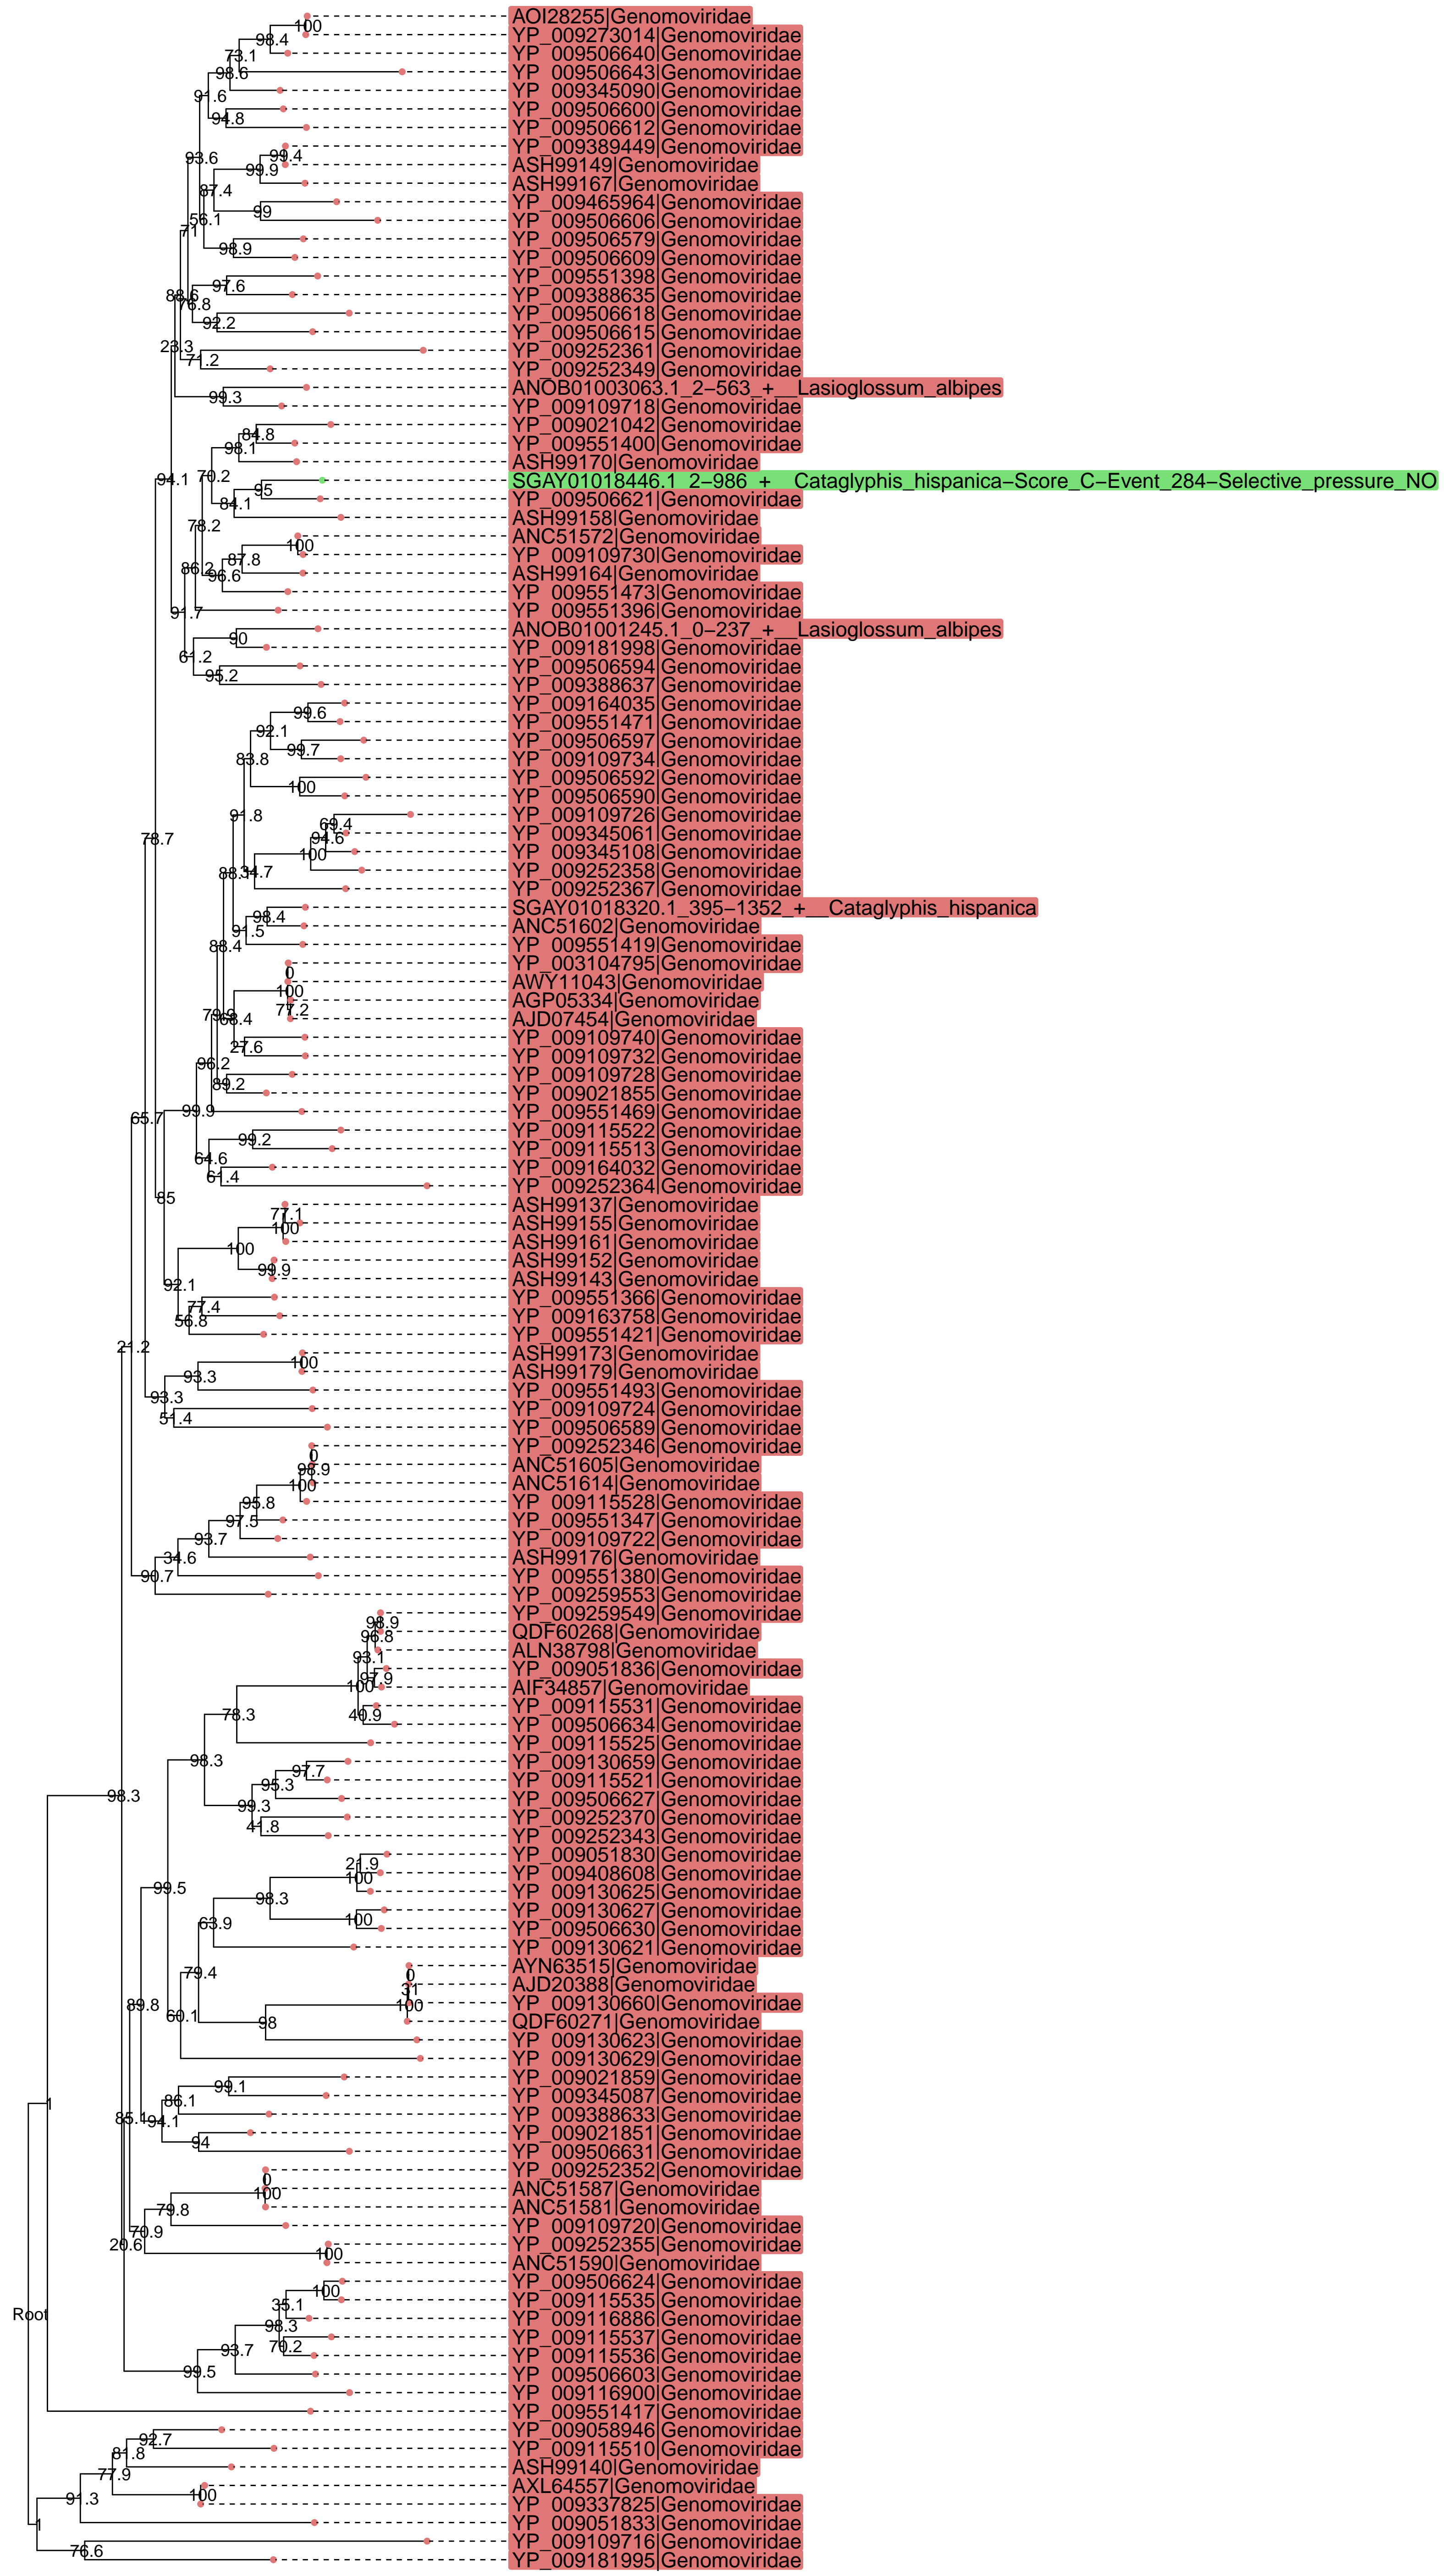

Cluster27505 – families involved : ['Partiti-Picobirna'] – putative protein : ['Uncharacterized protein']

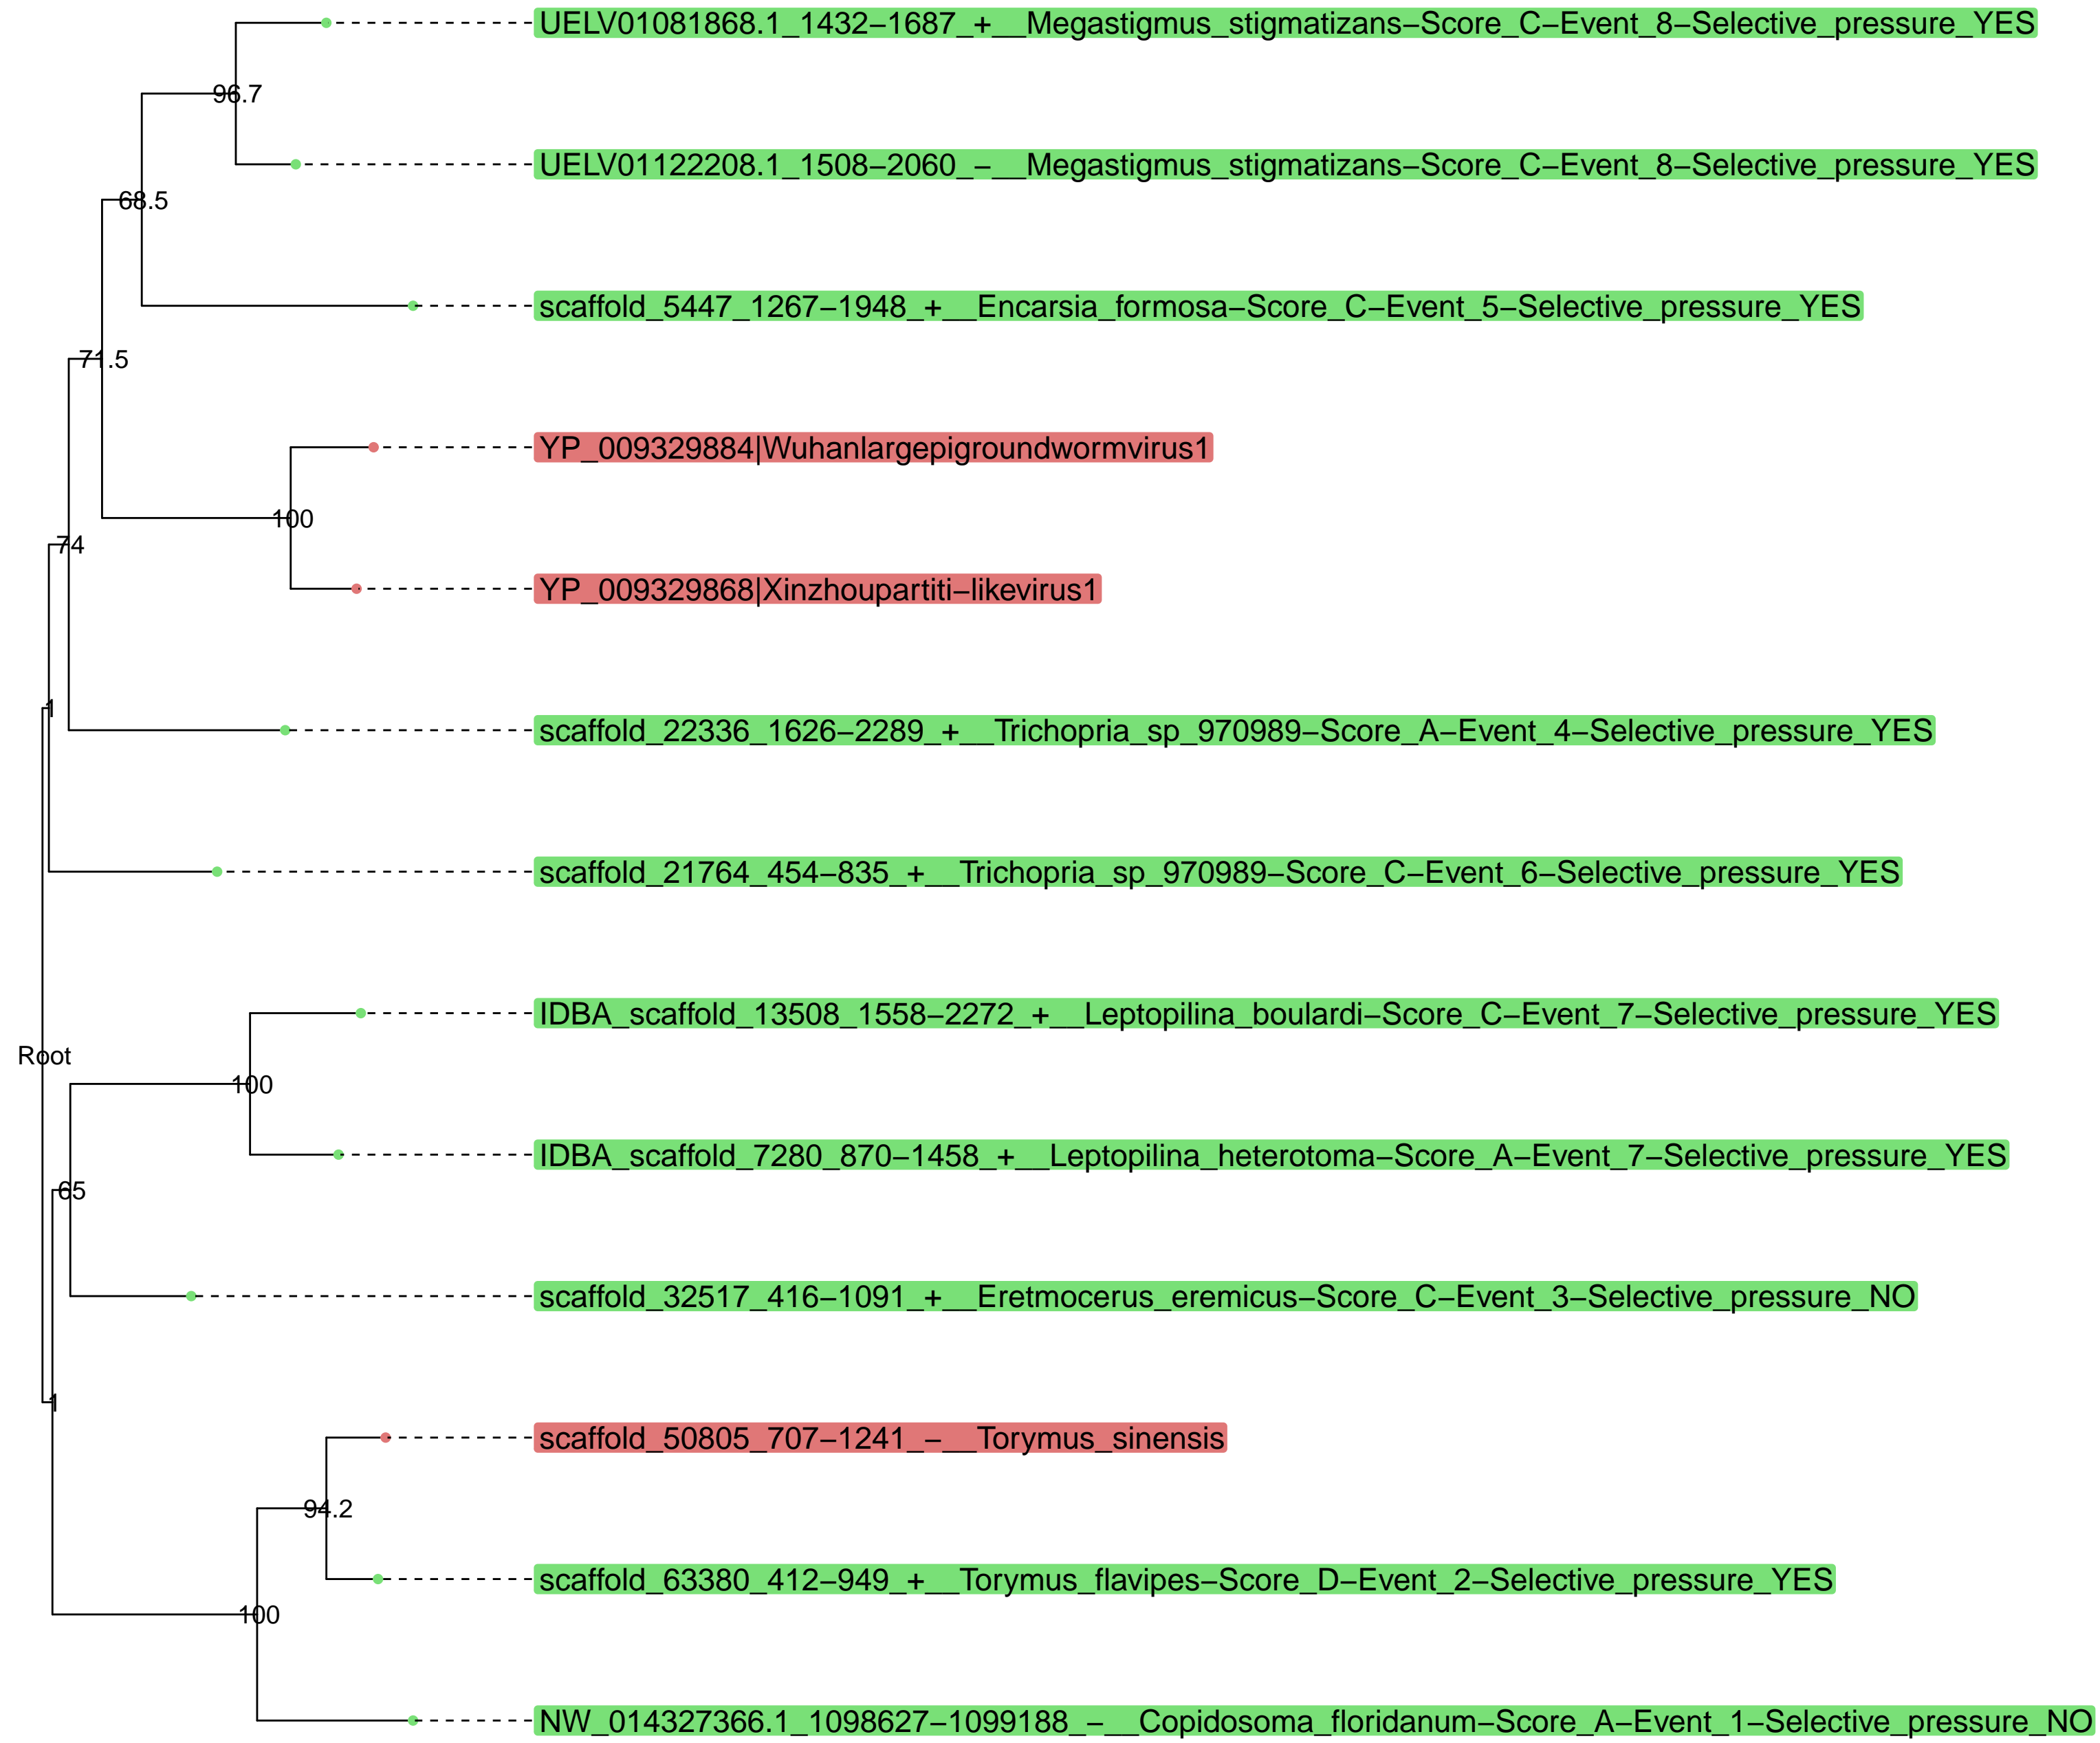

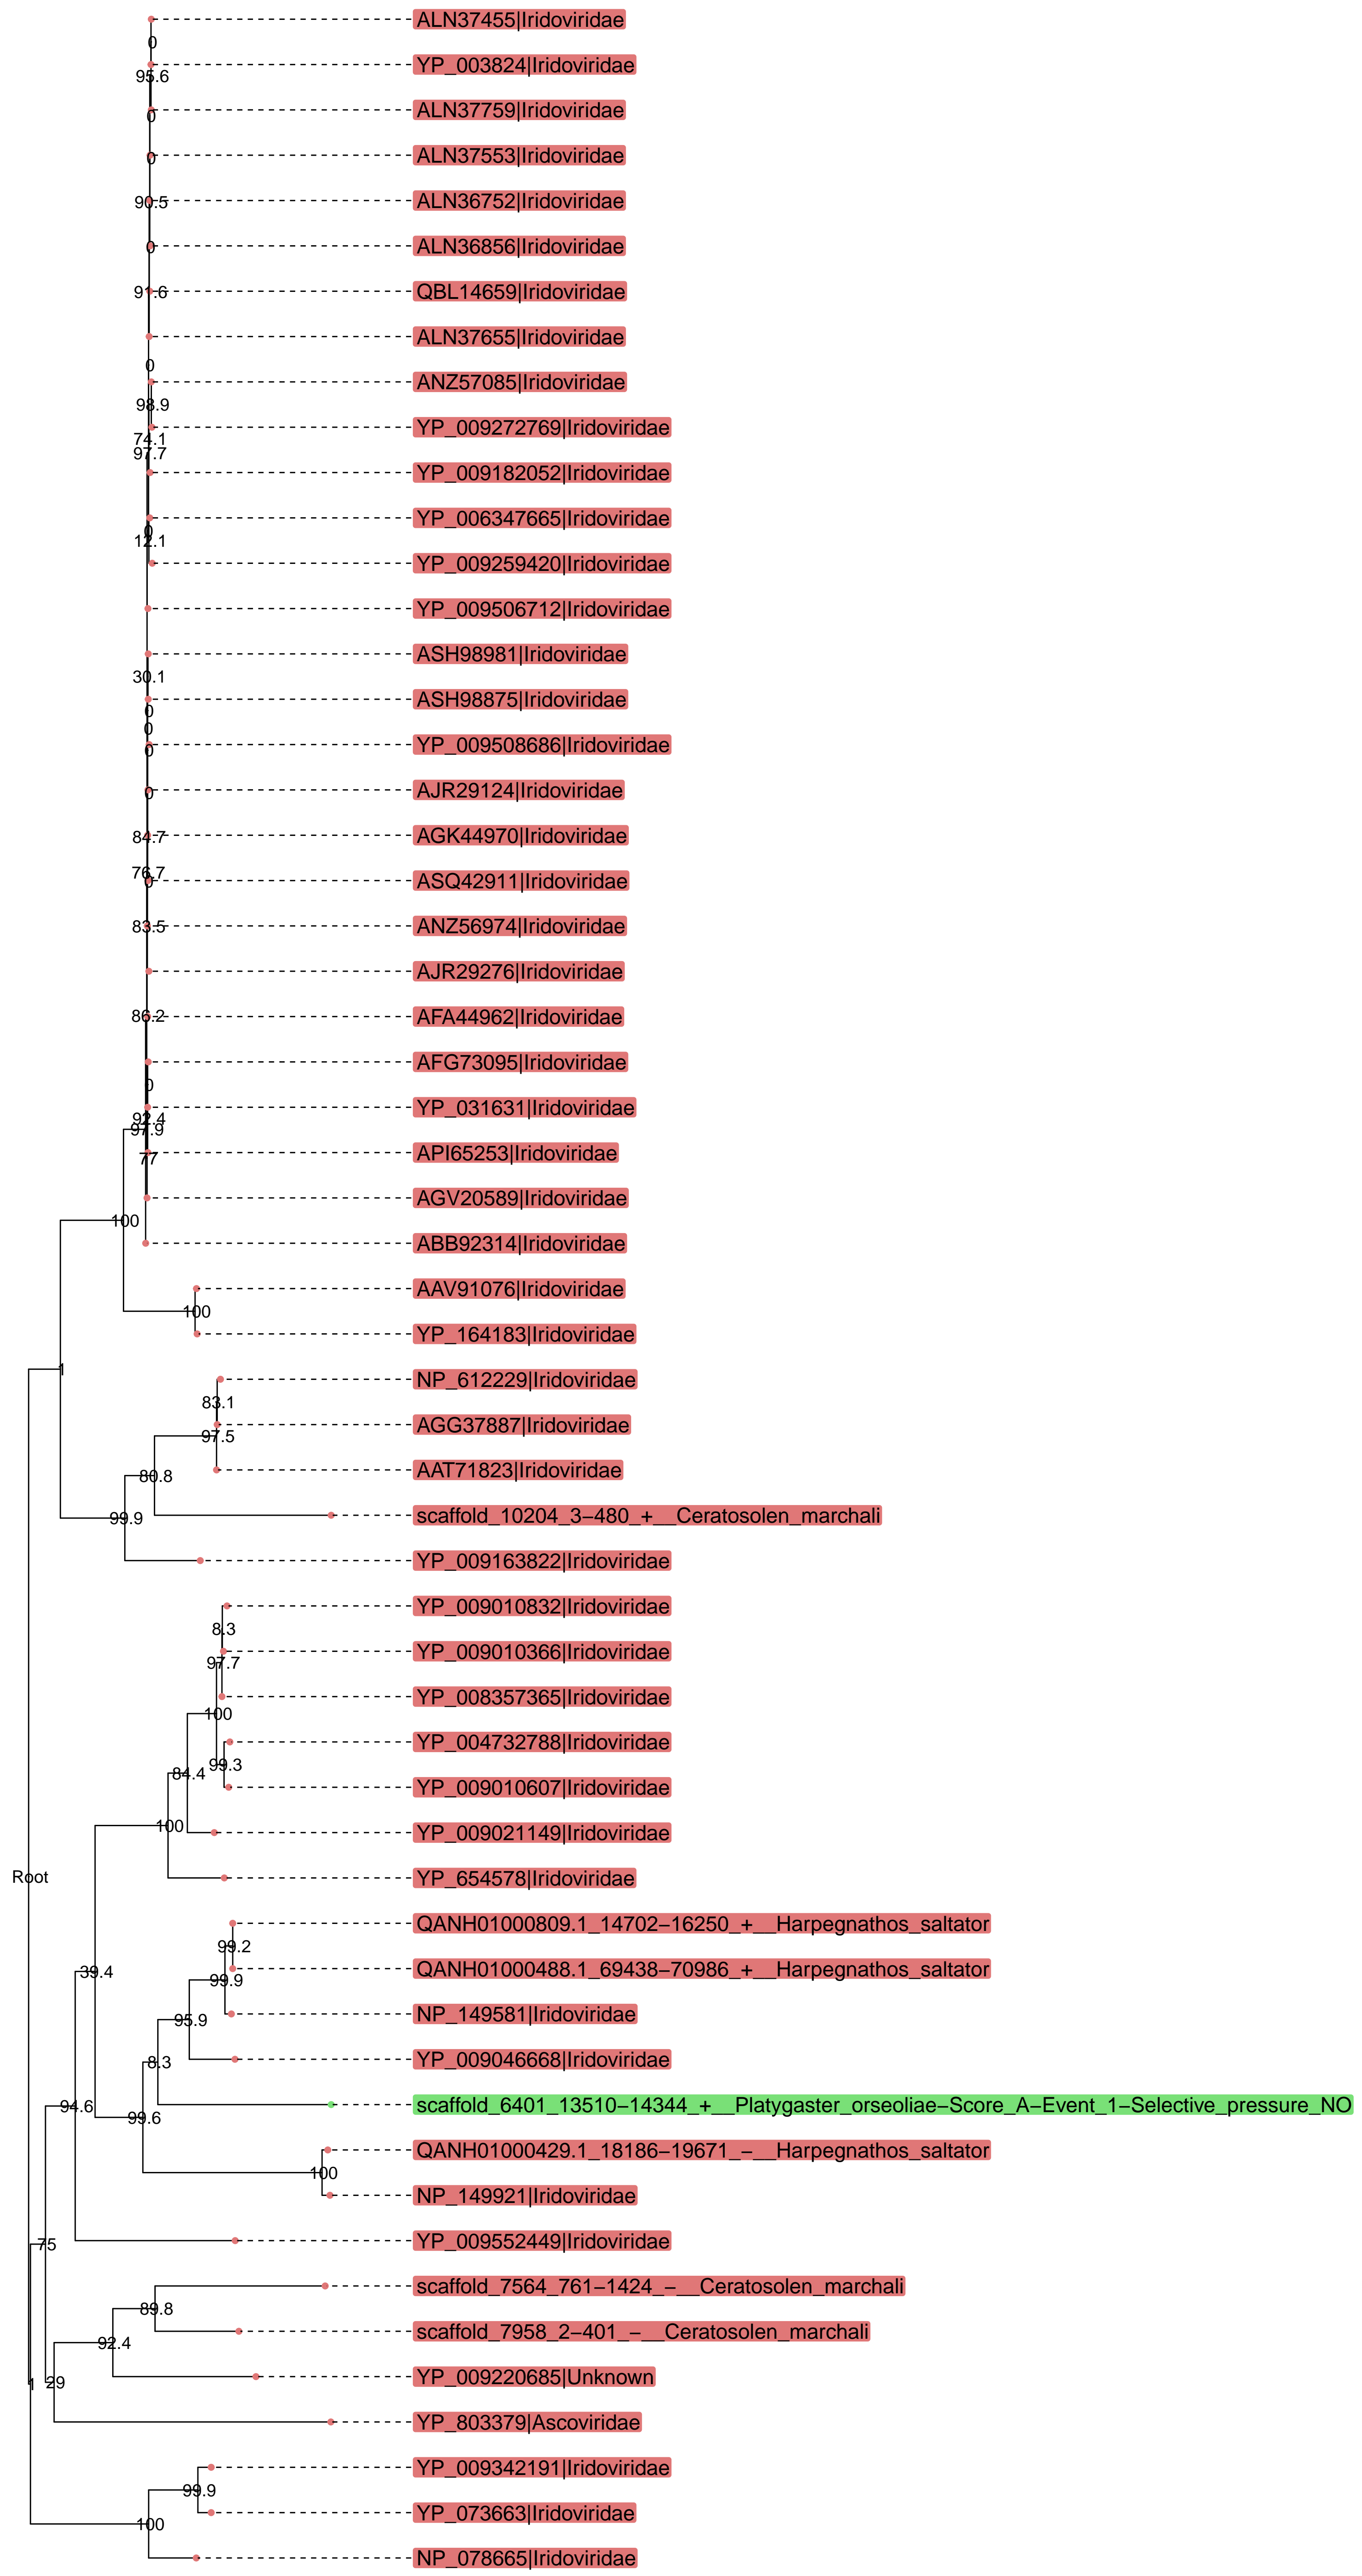

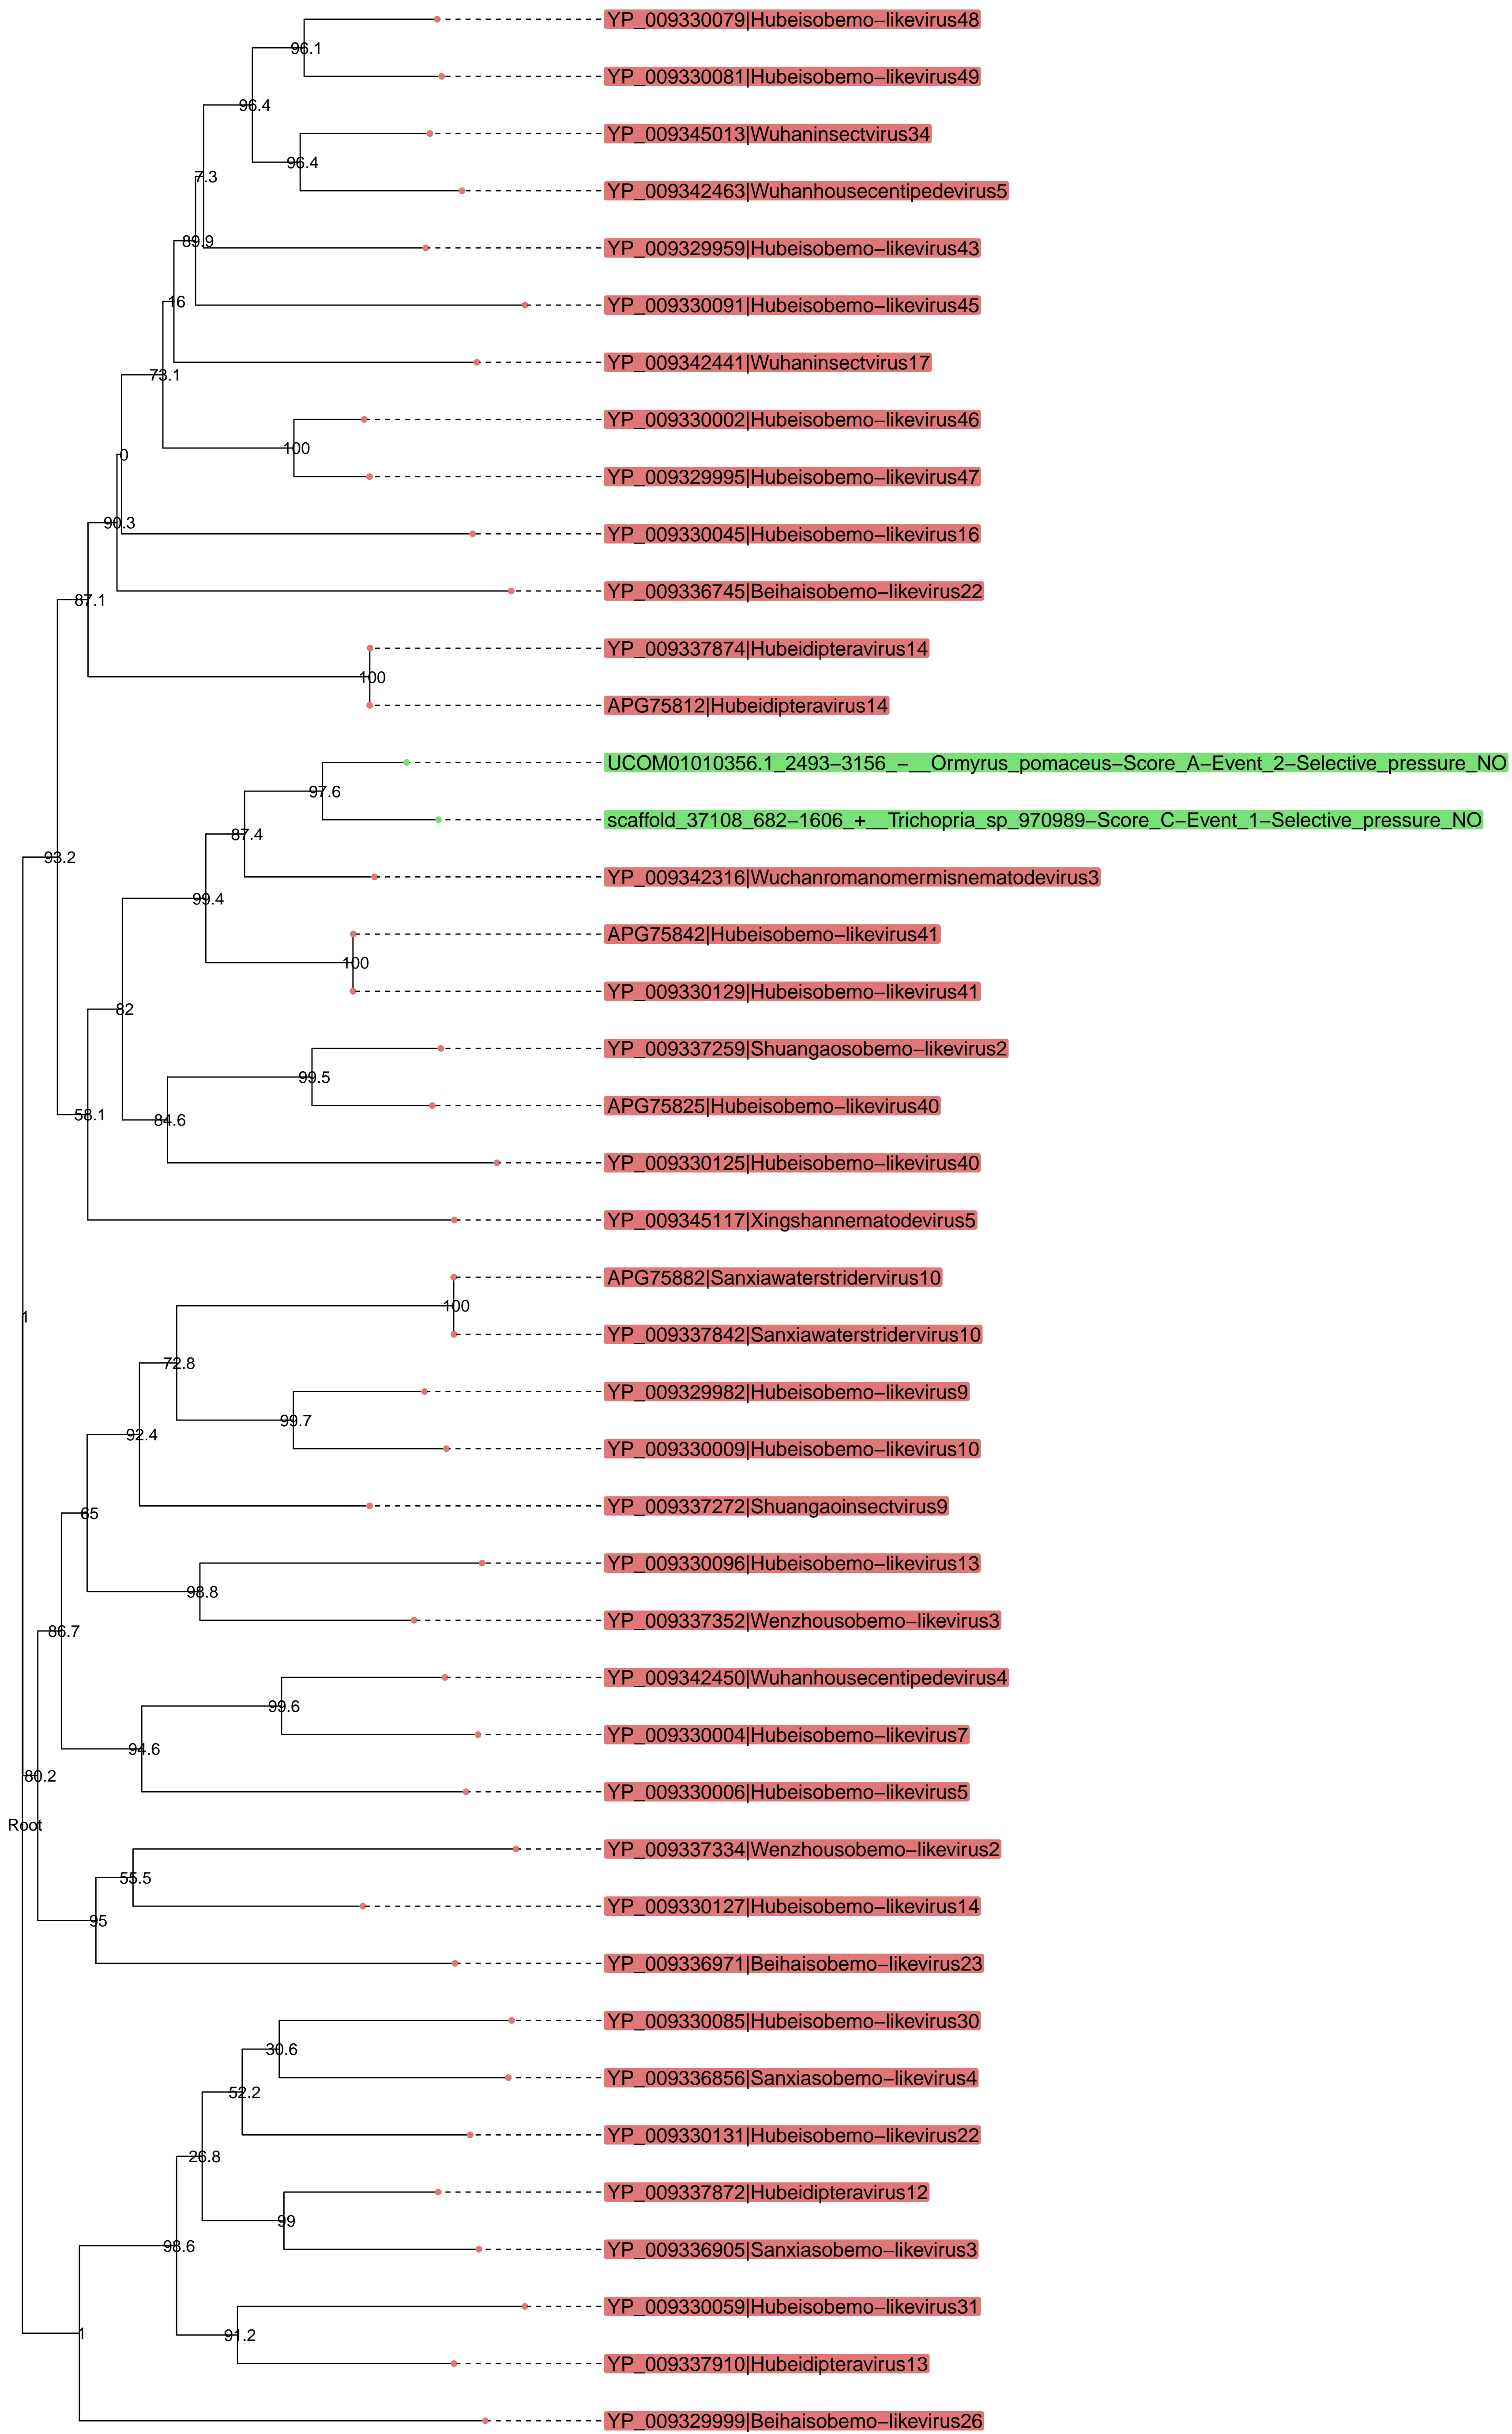





Cluster26053 – families involved : ['Qinviridae'] – putative protein : ['RNA-dependent RNA polymerase']

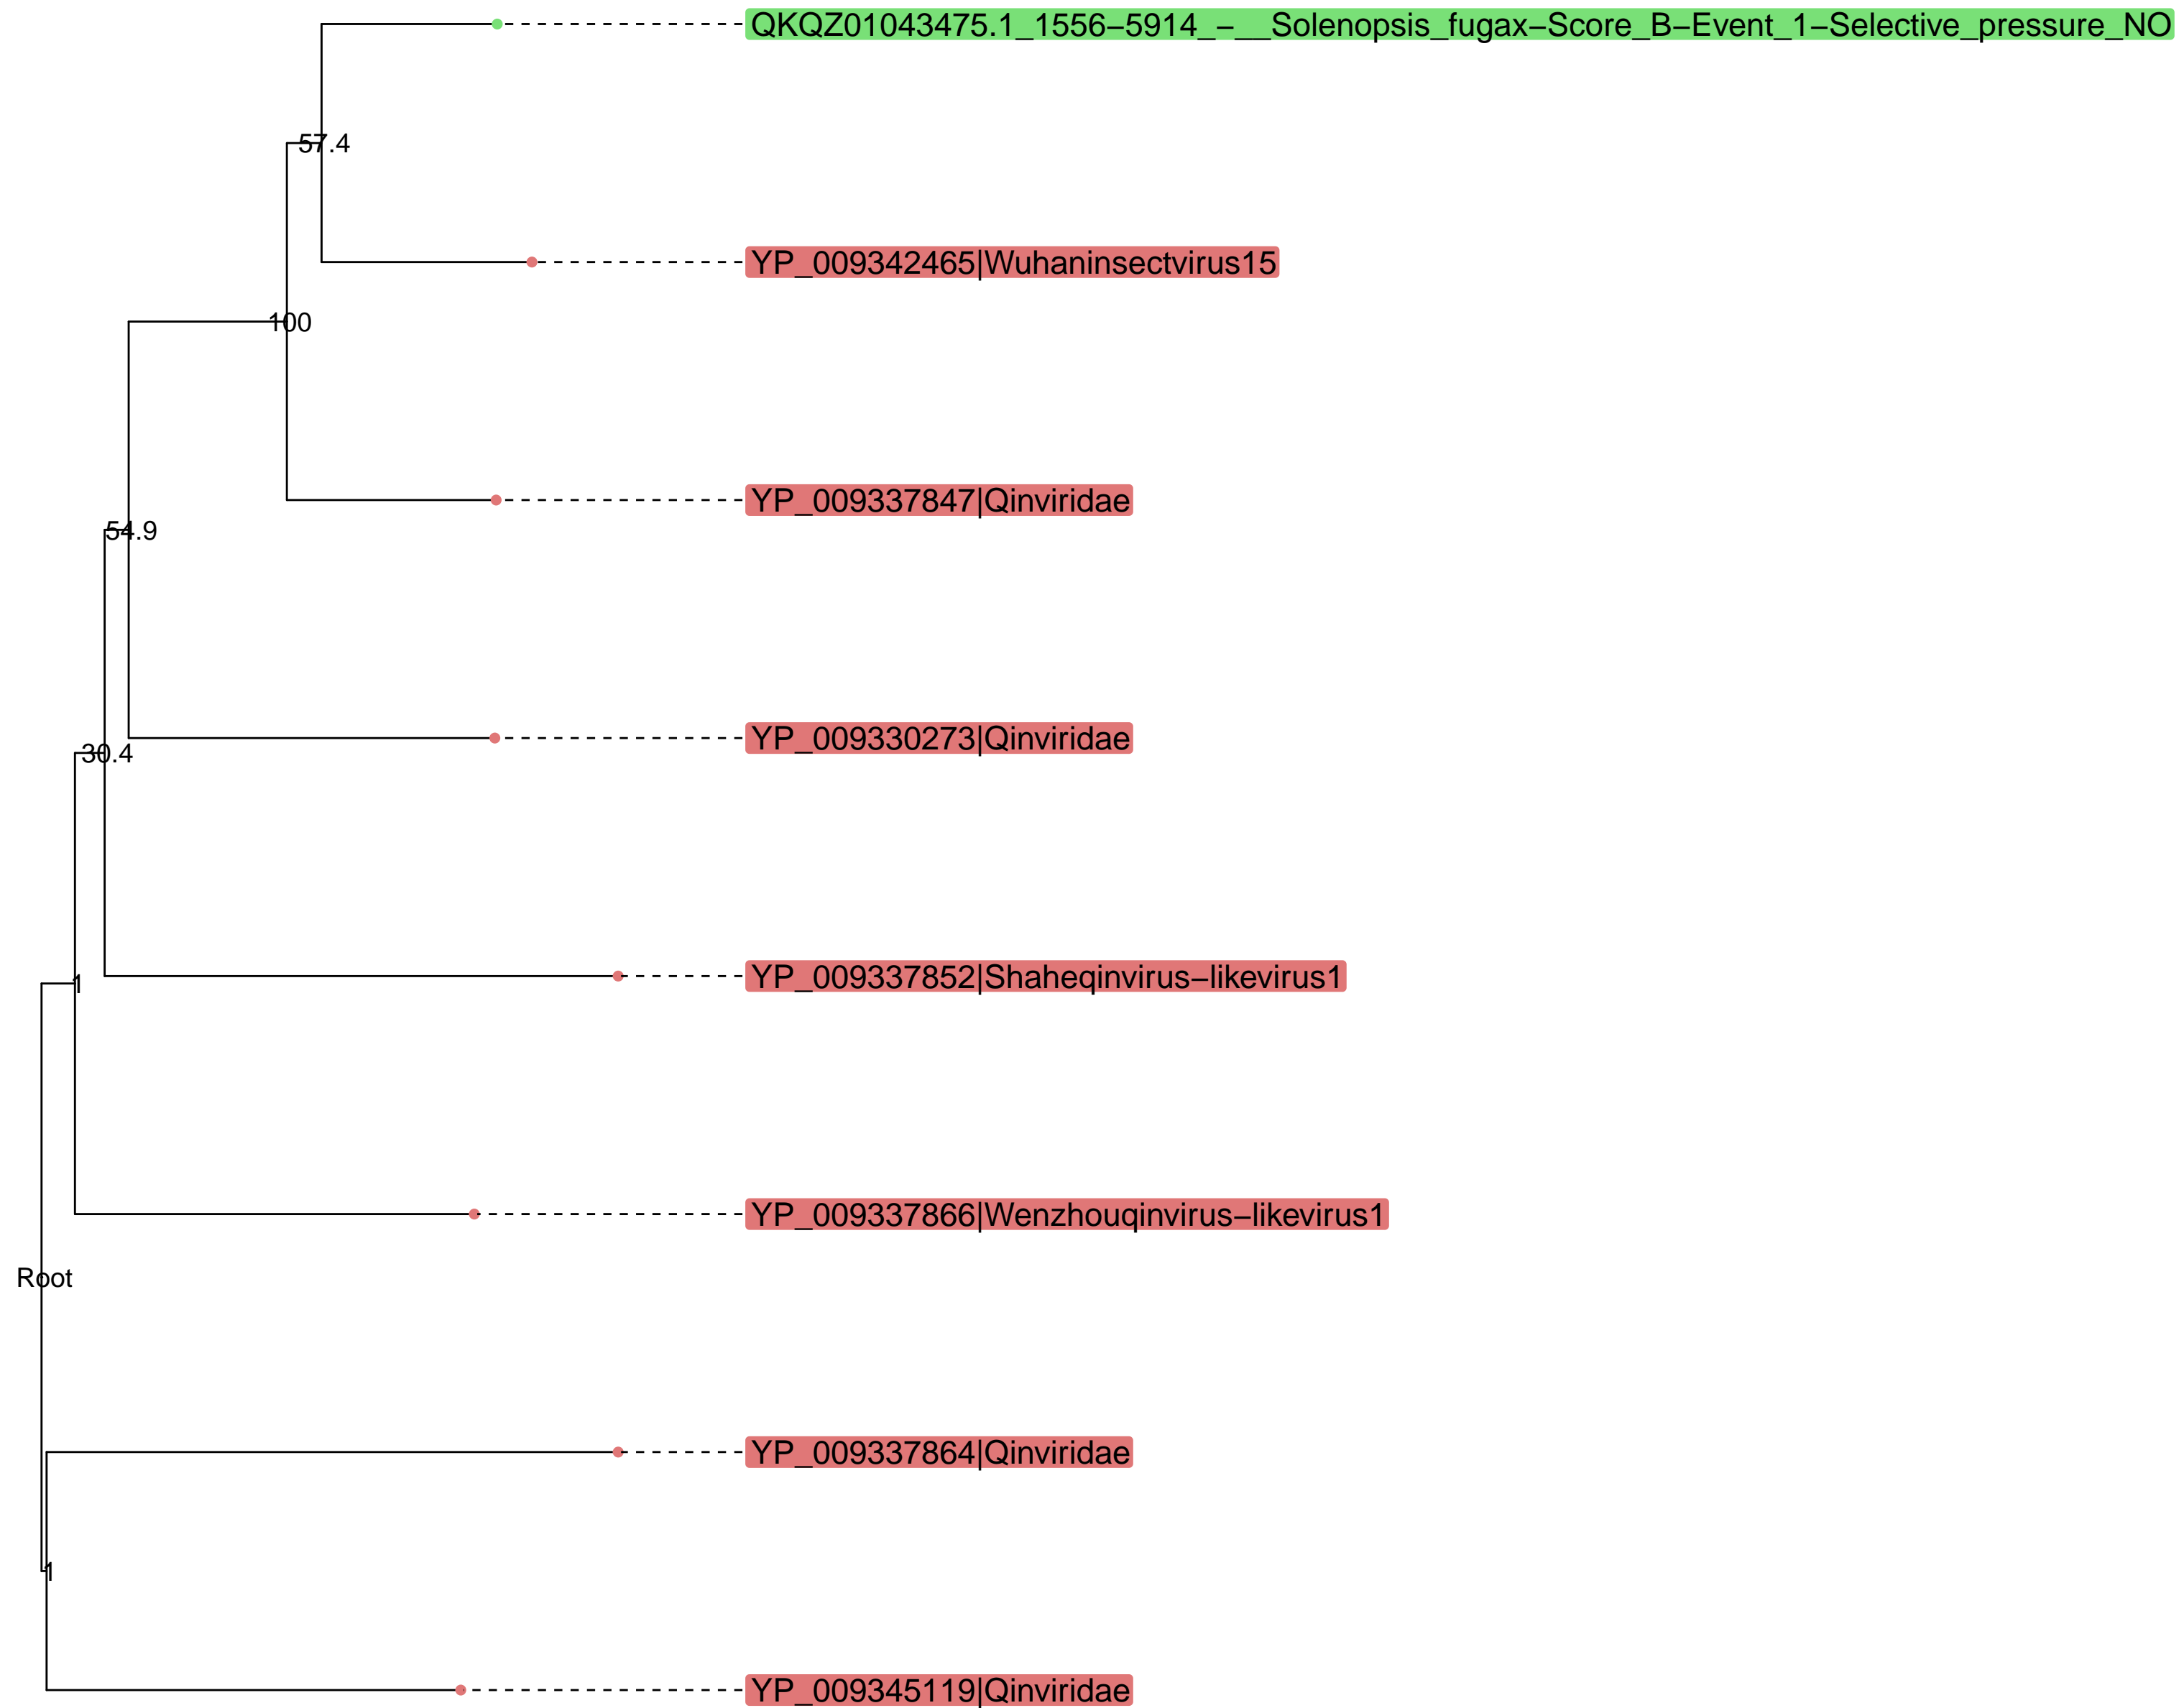

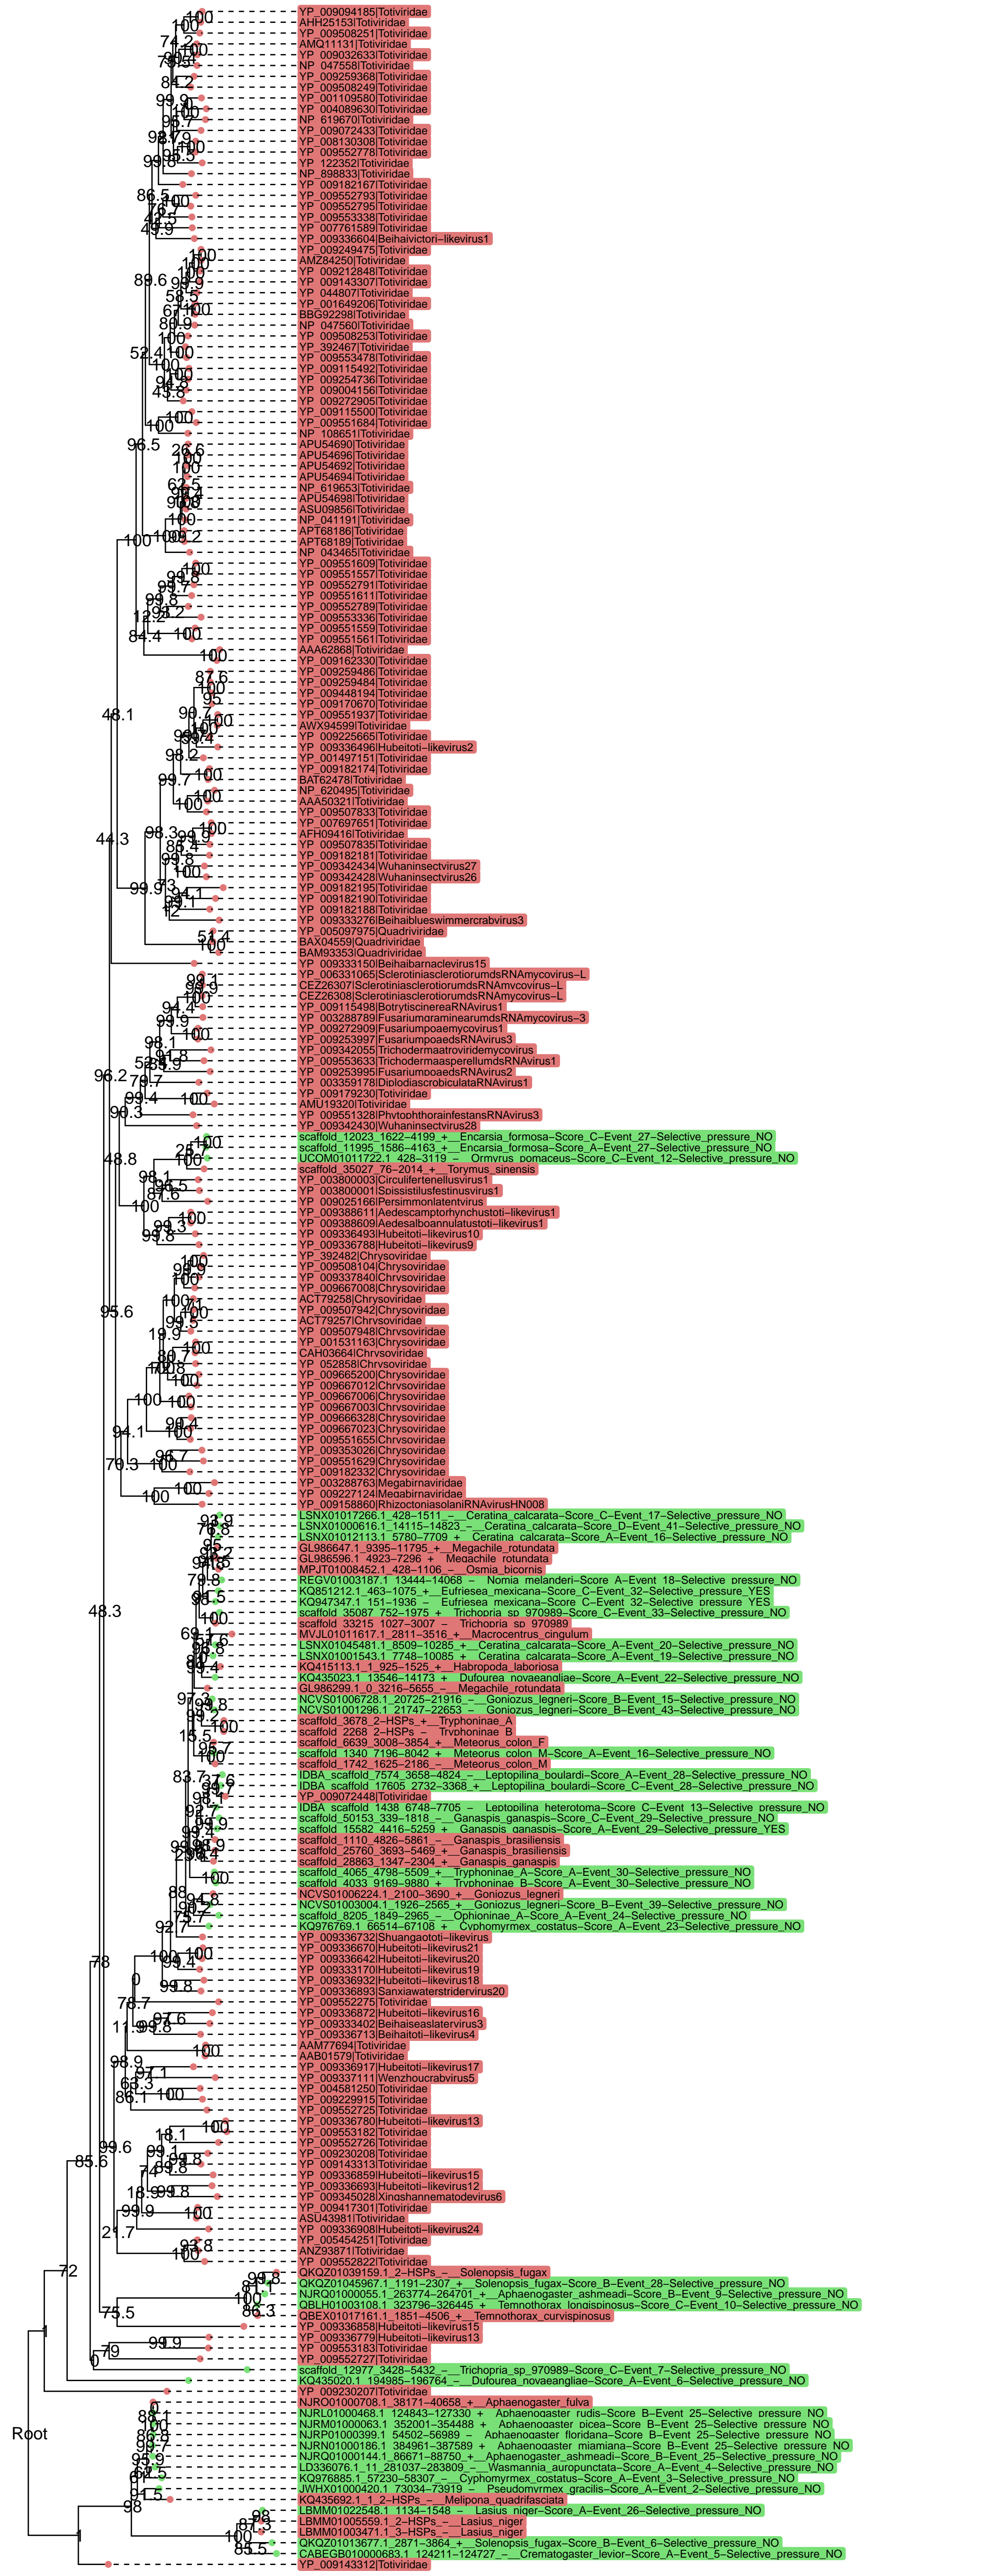

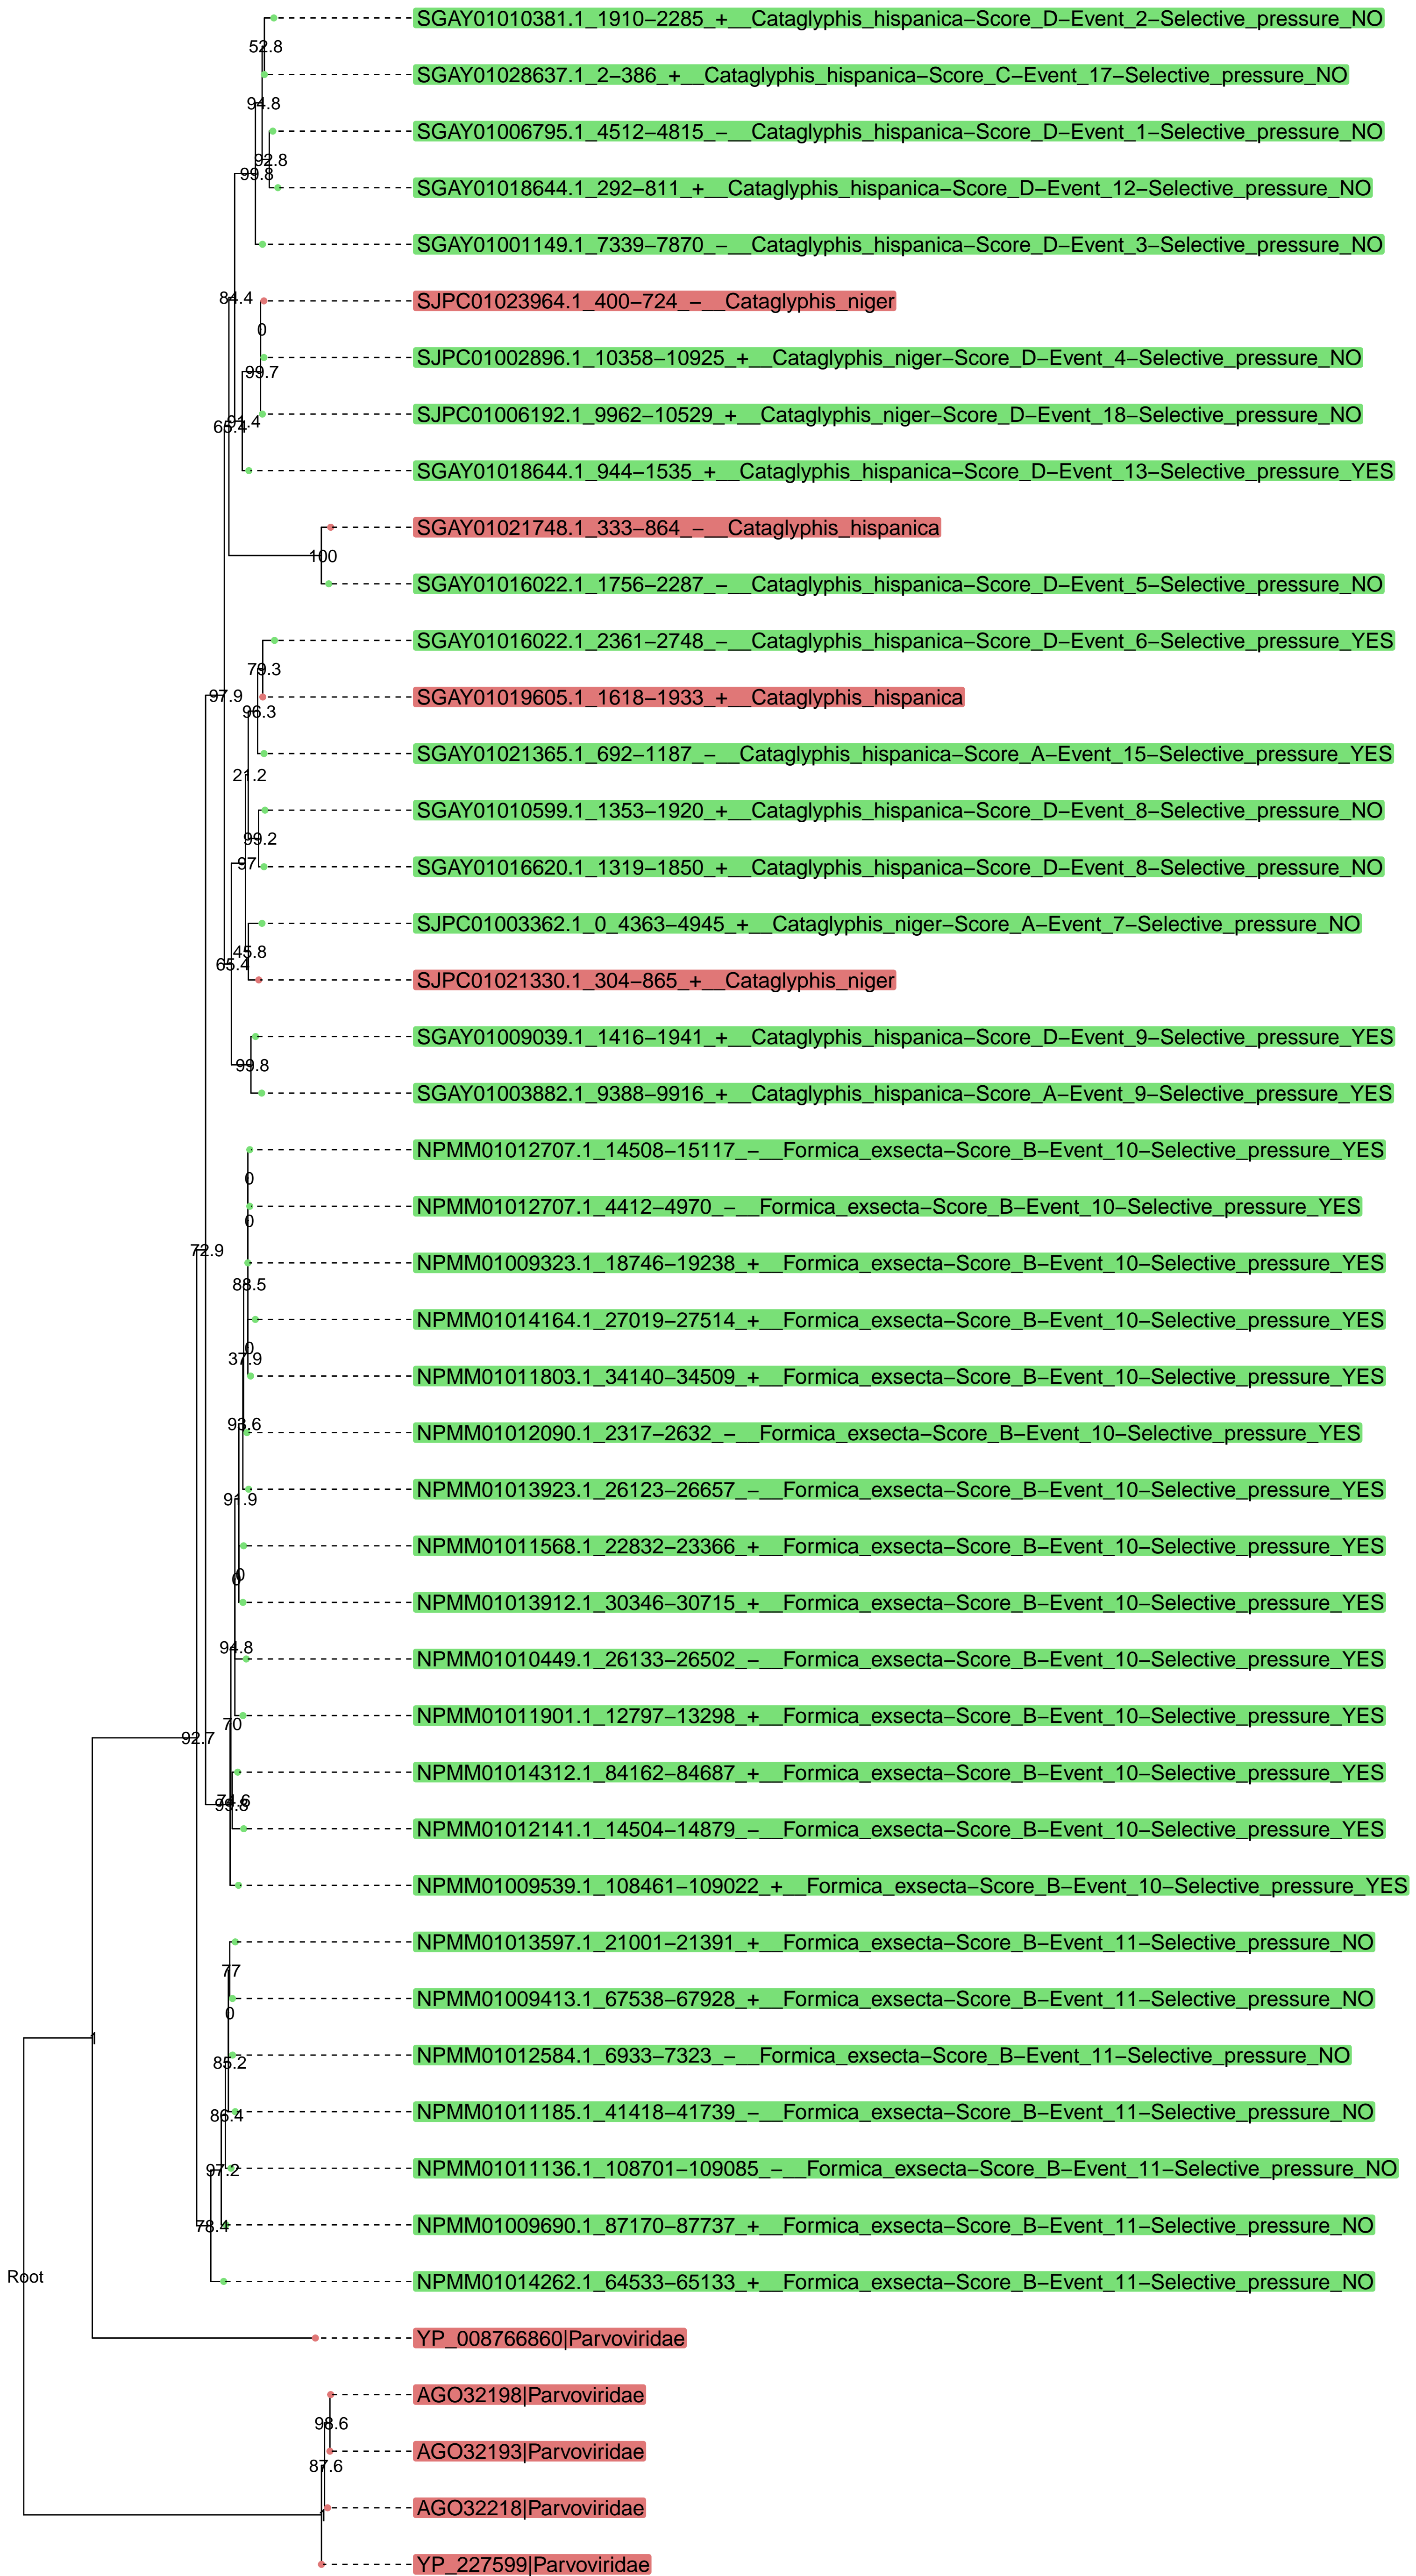

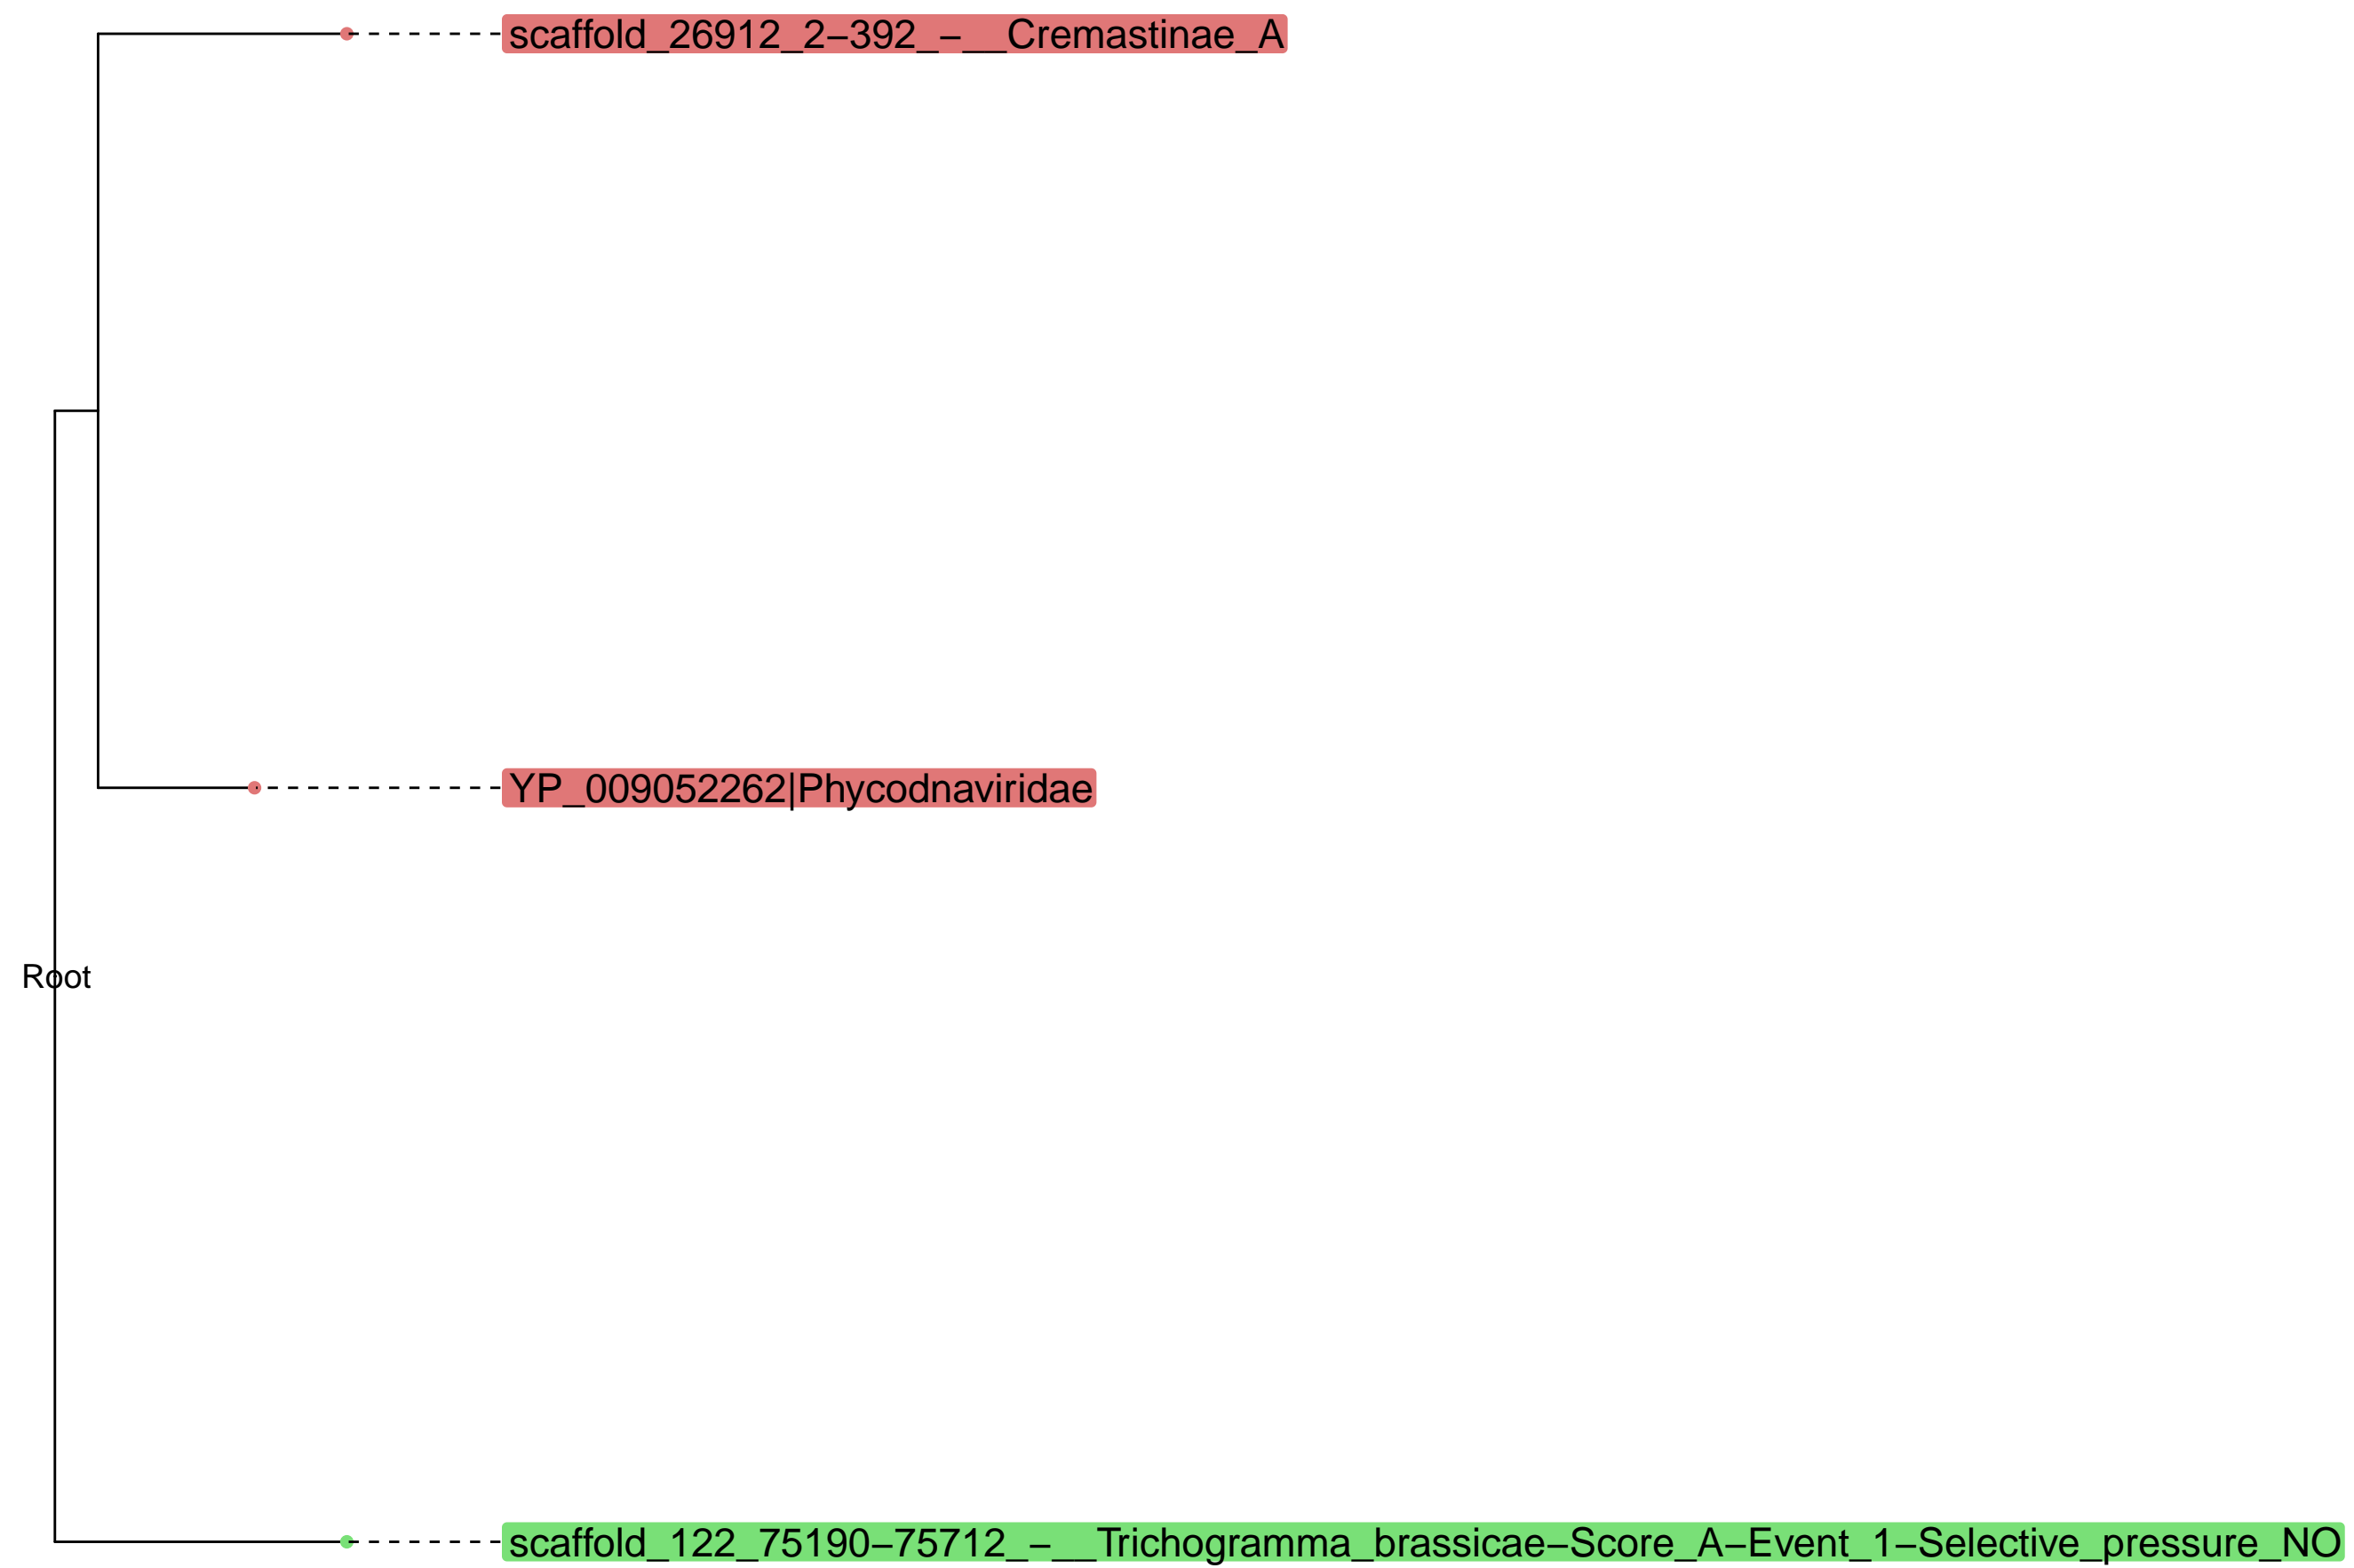

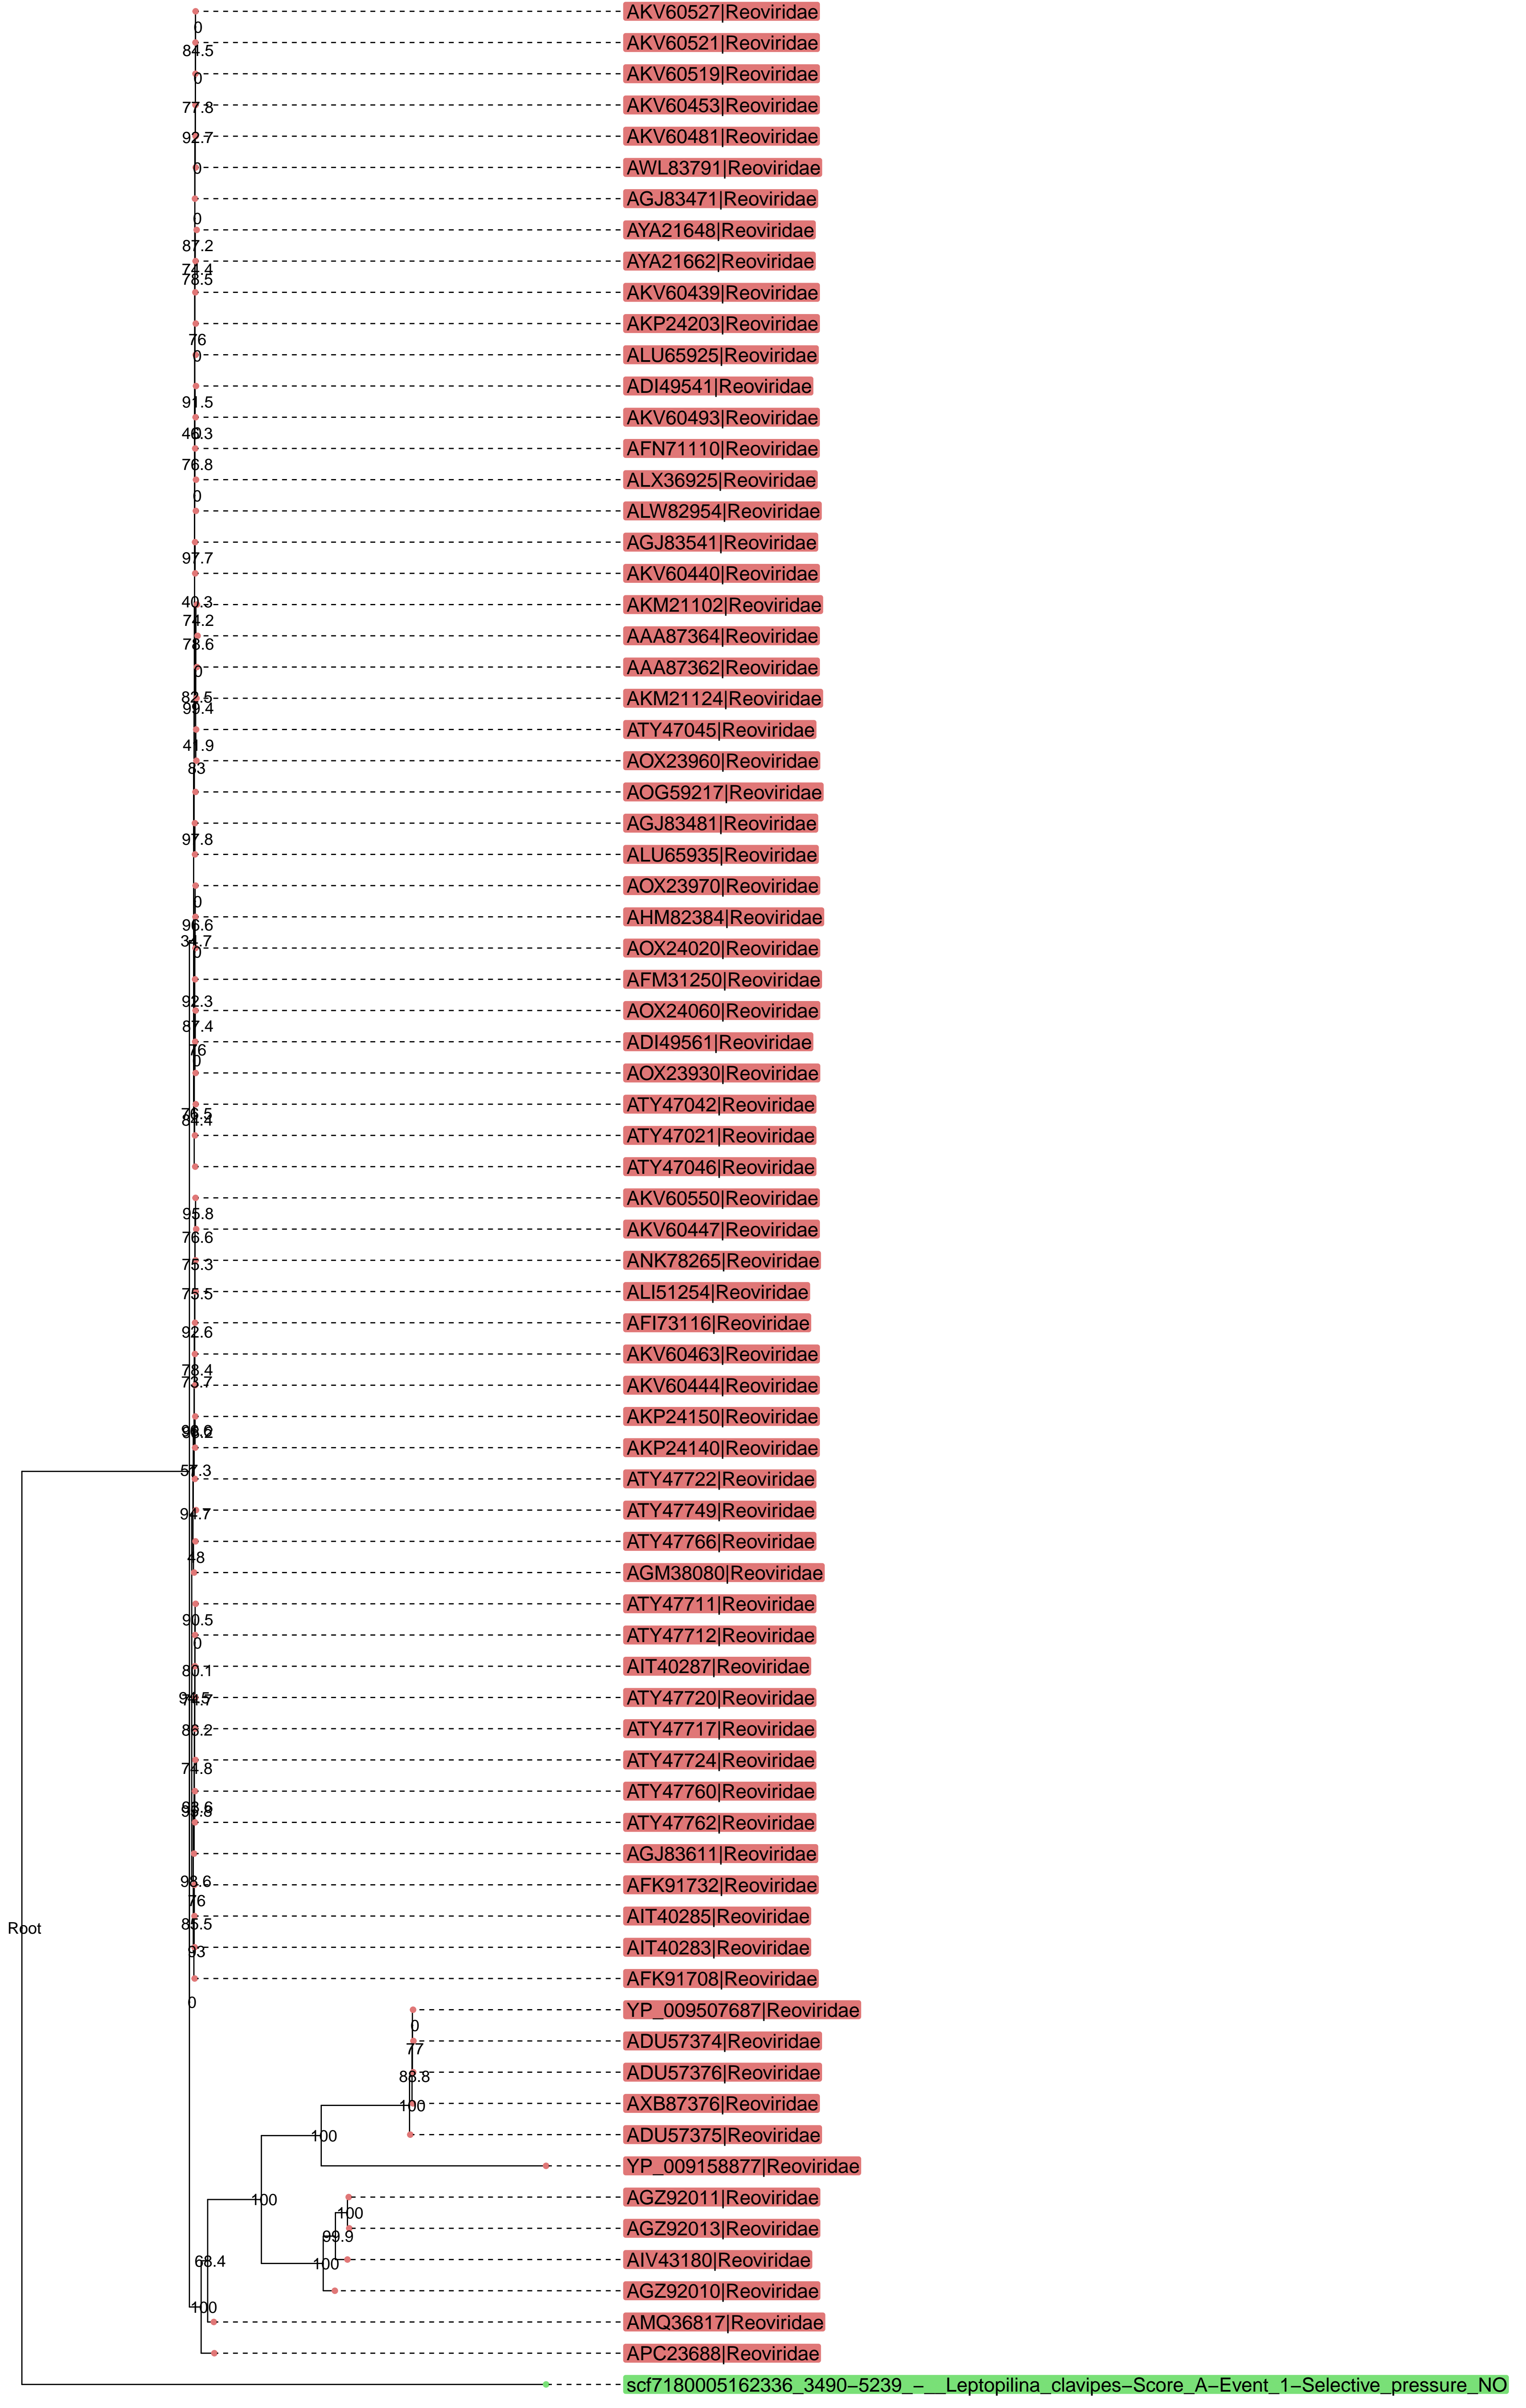

Cluster23500 – families involved : ['Poxviridae'] – putative protein : ['Uncharacterized protein']

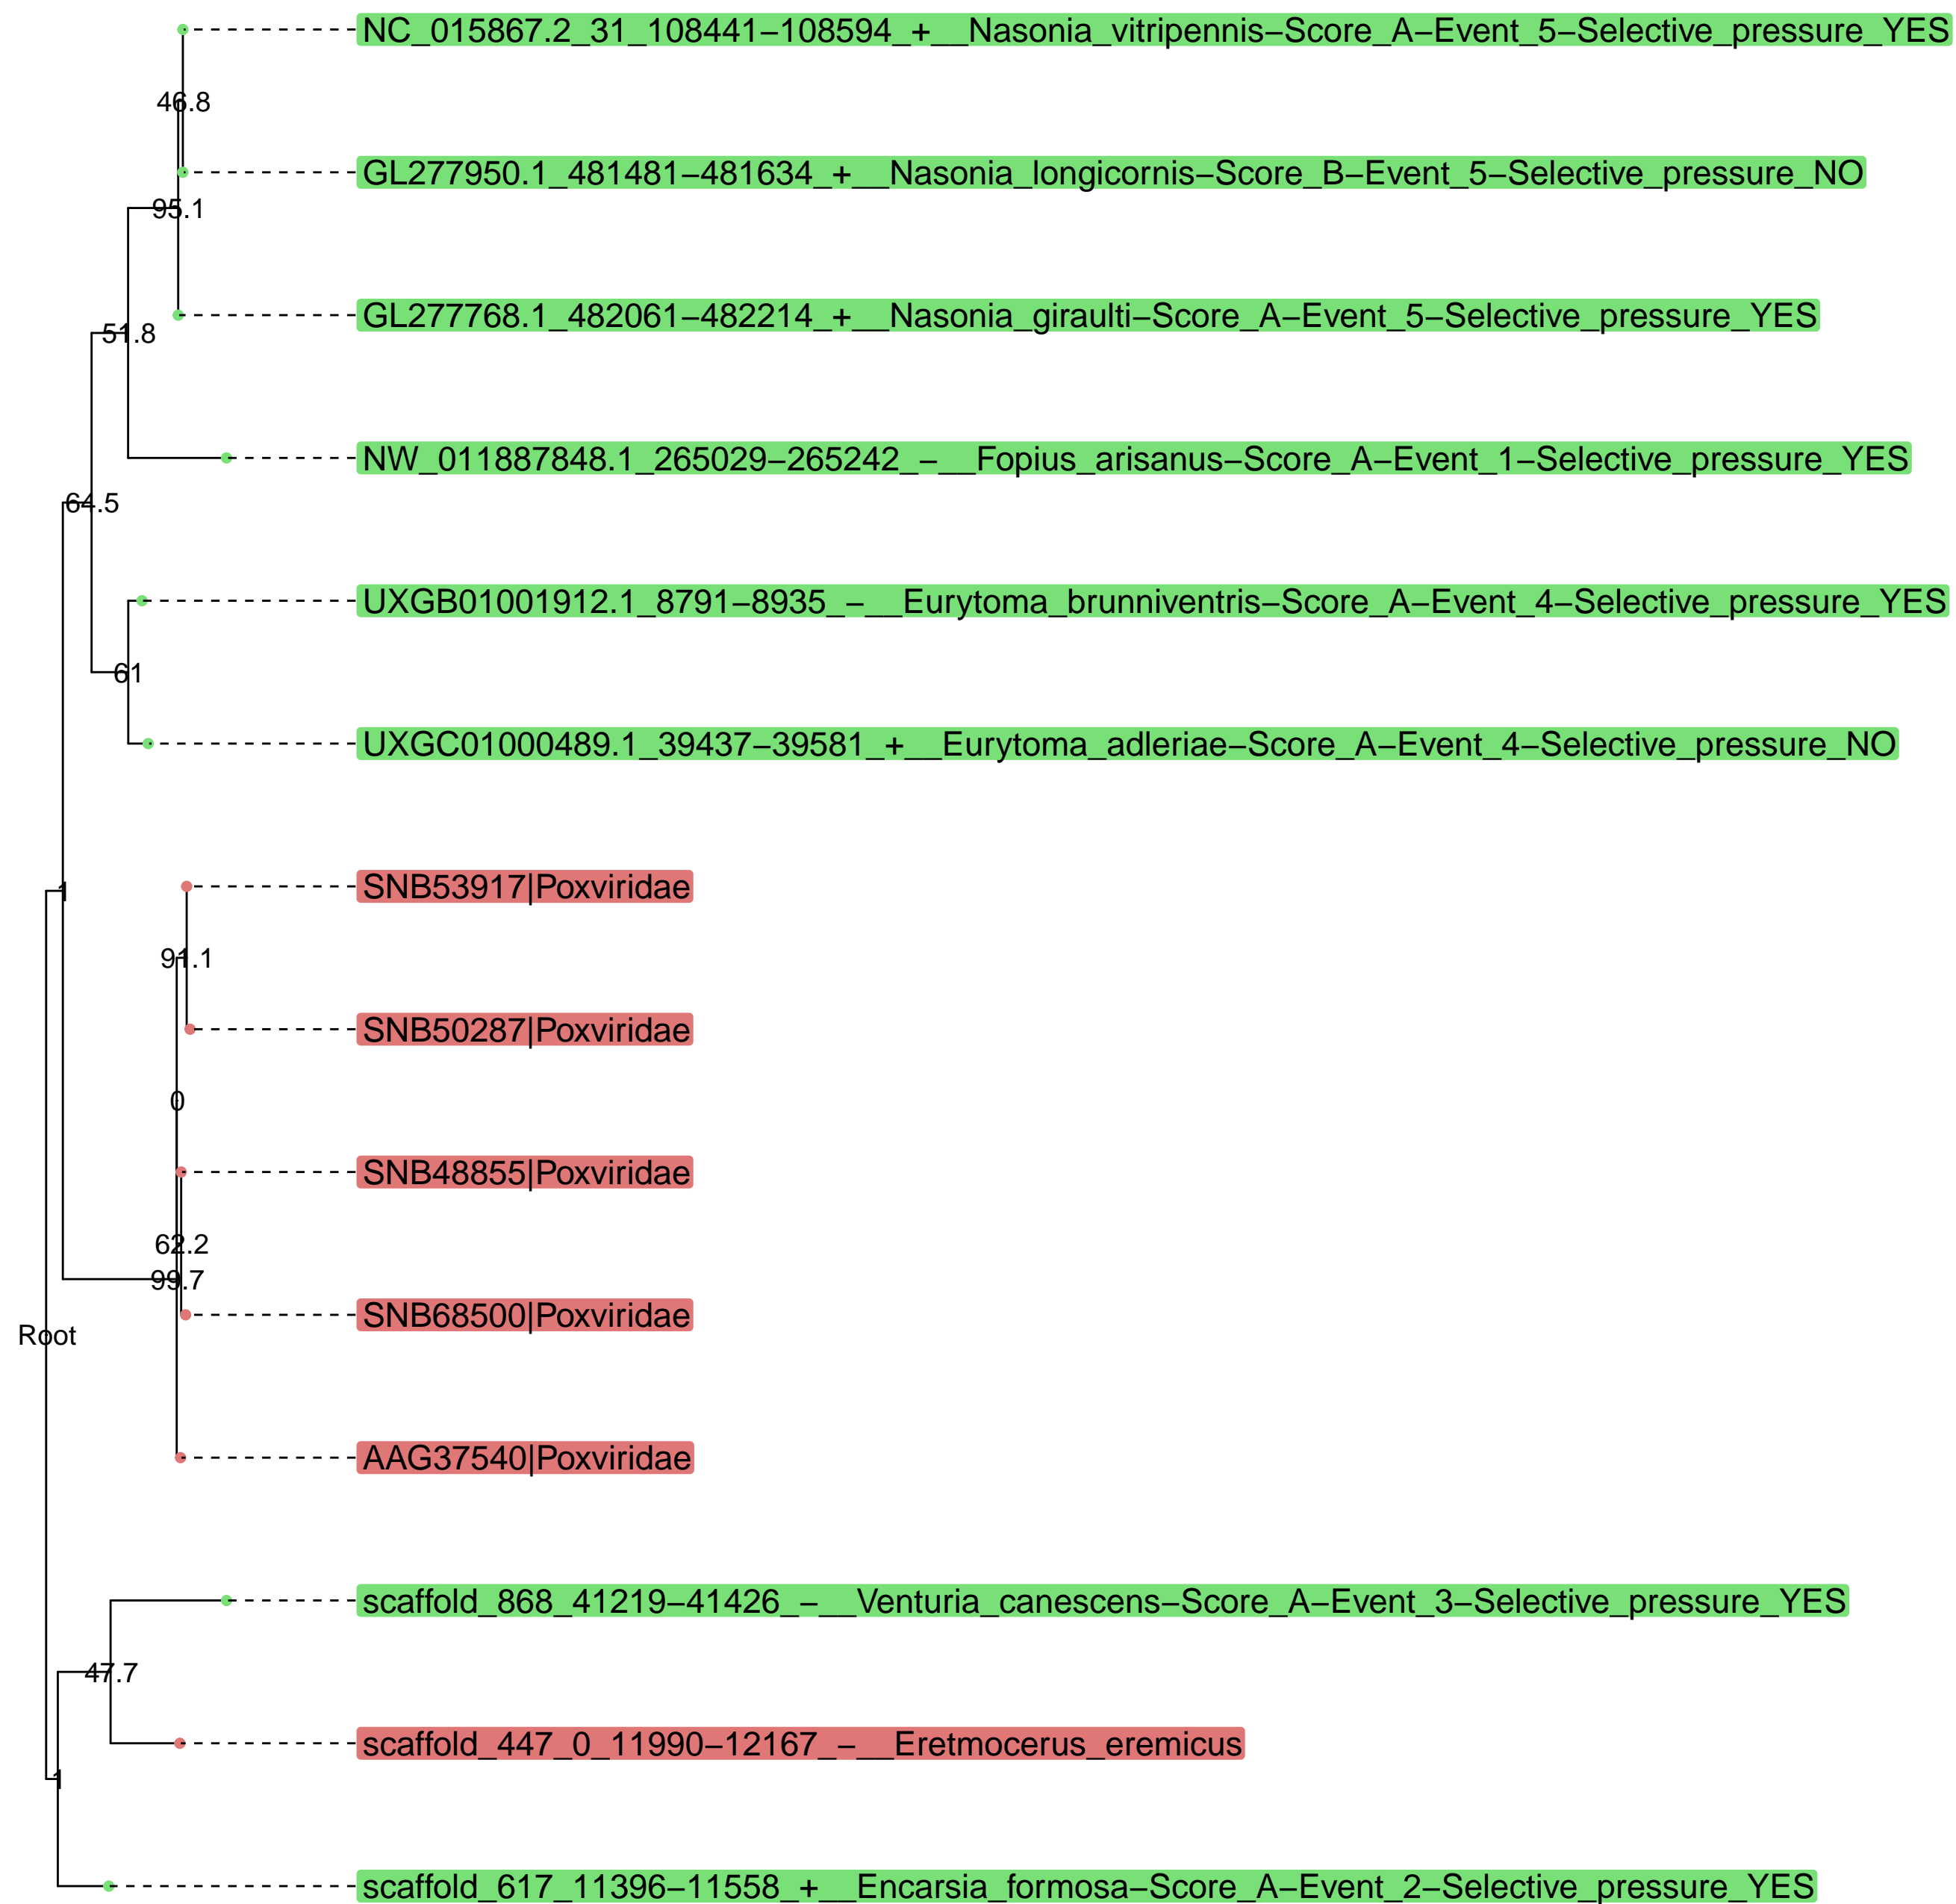

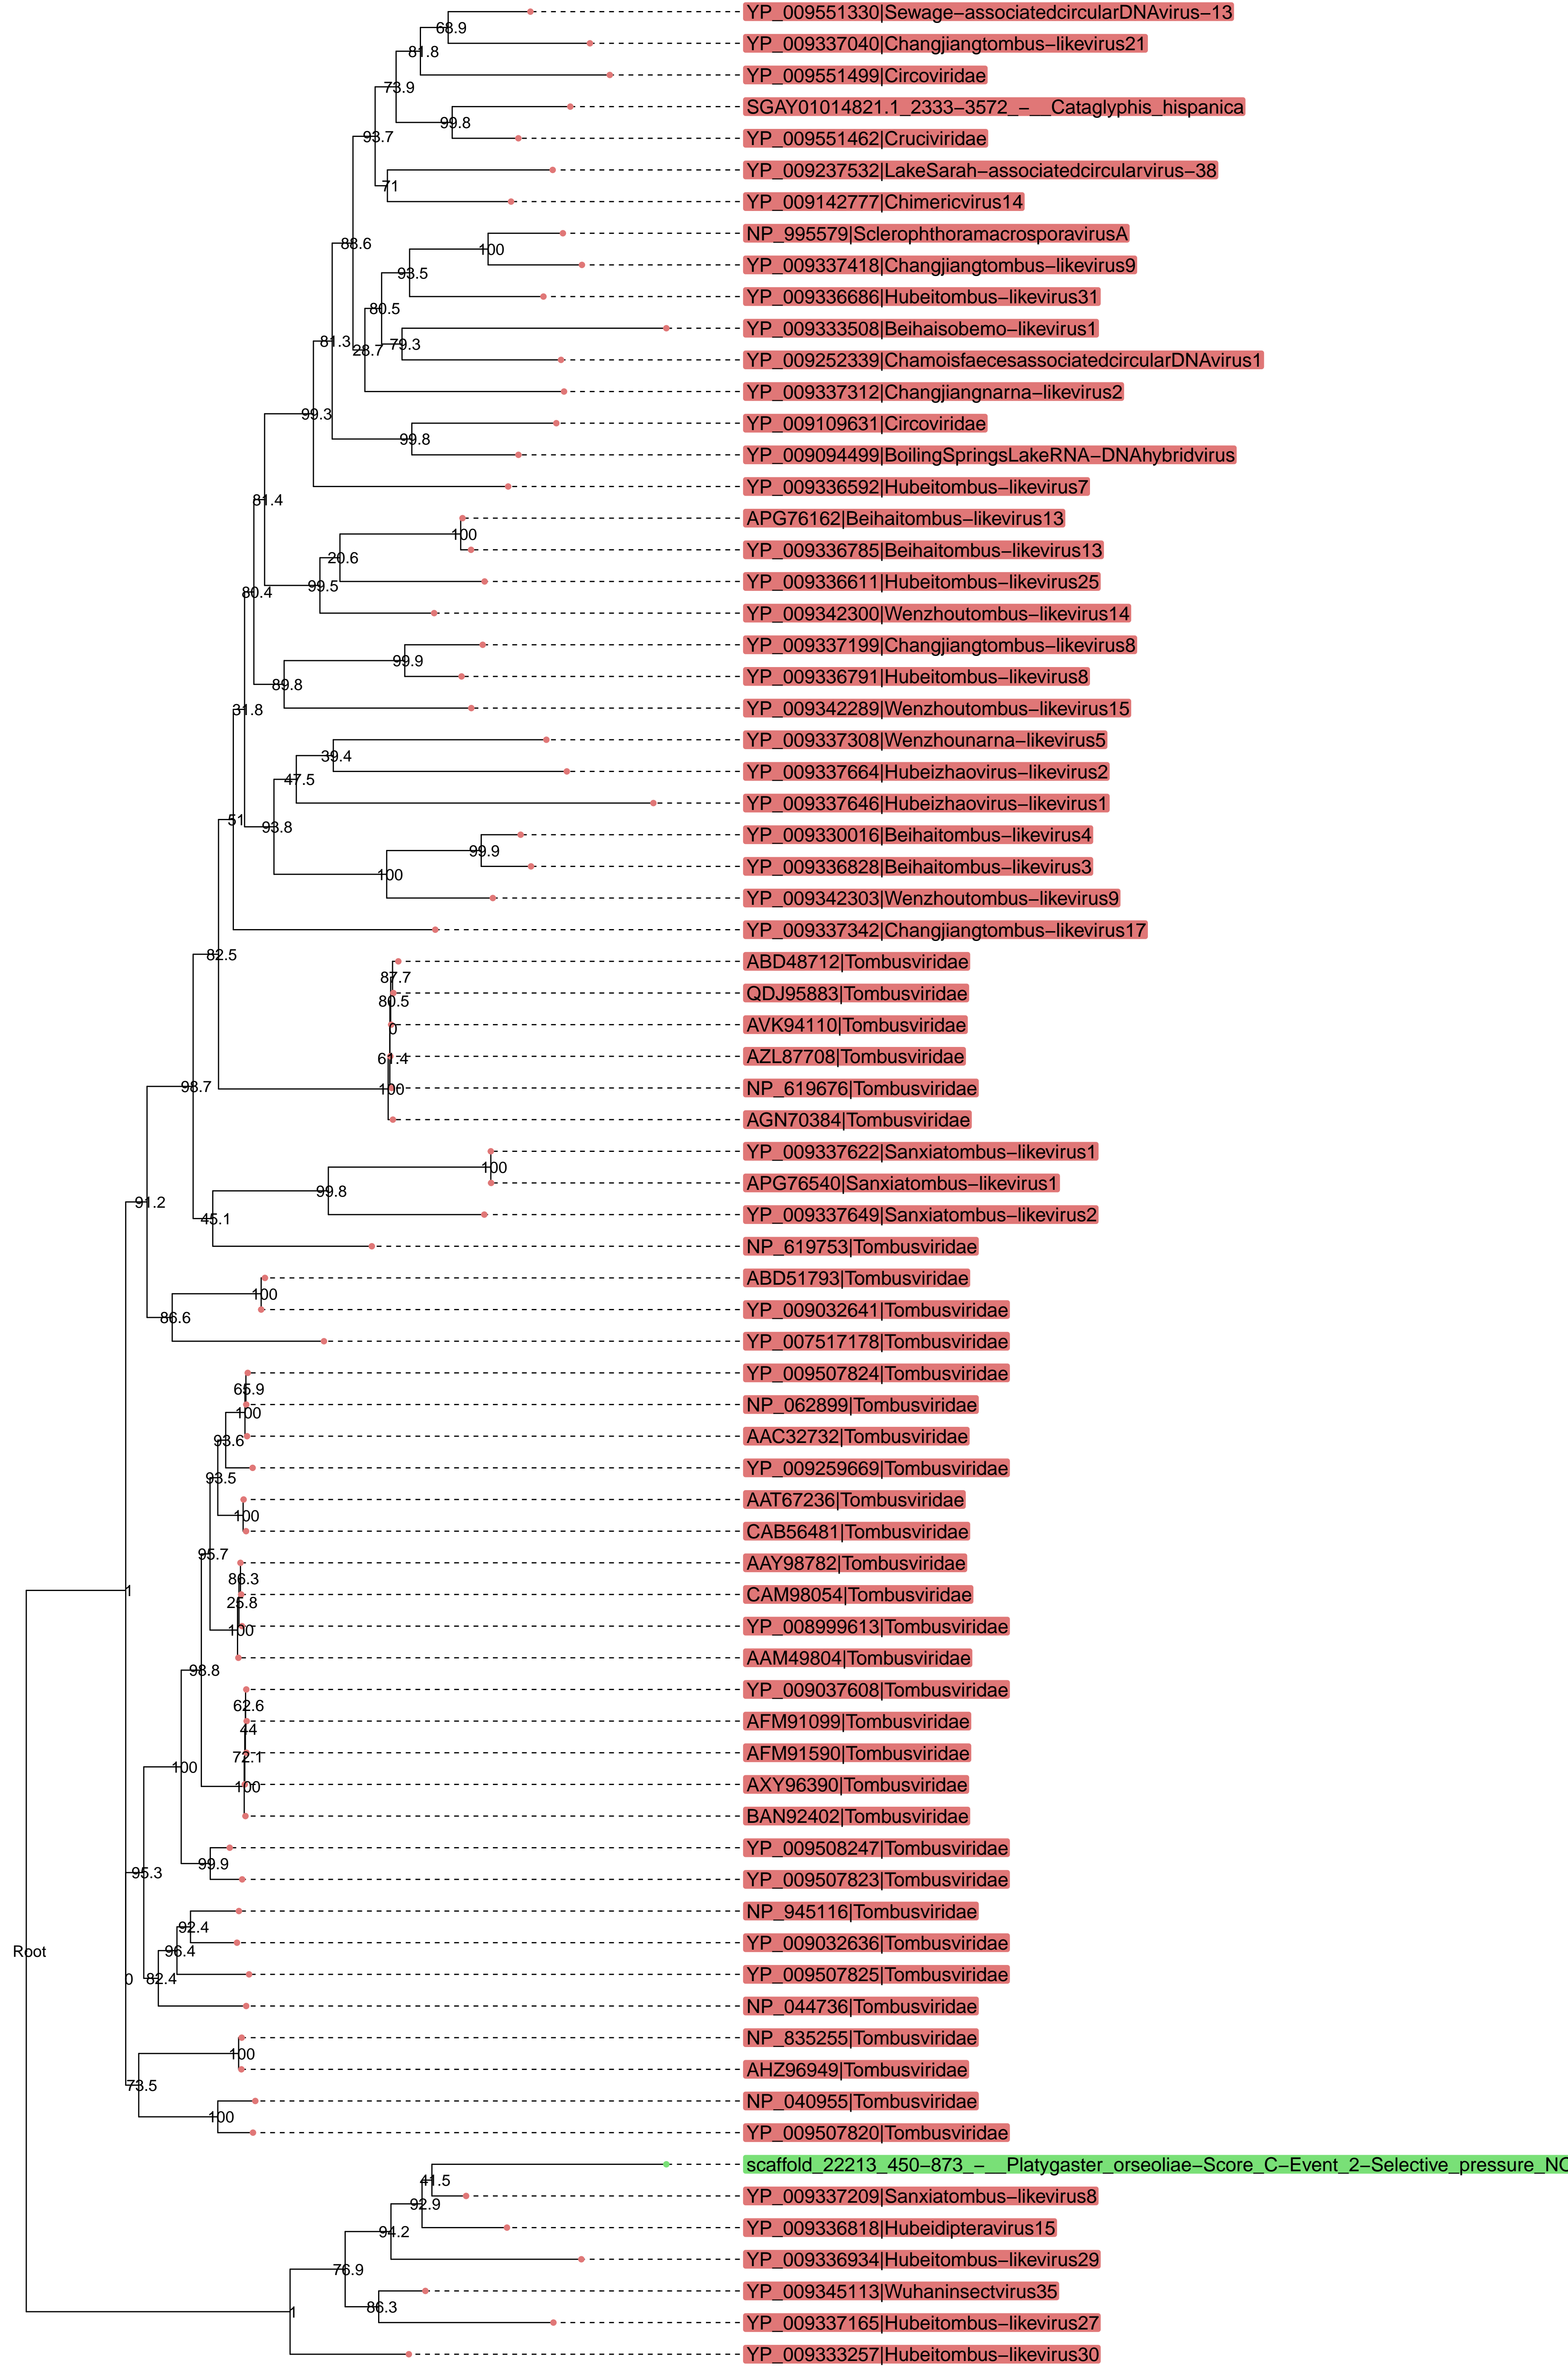

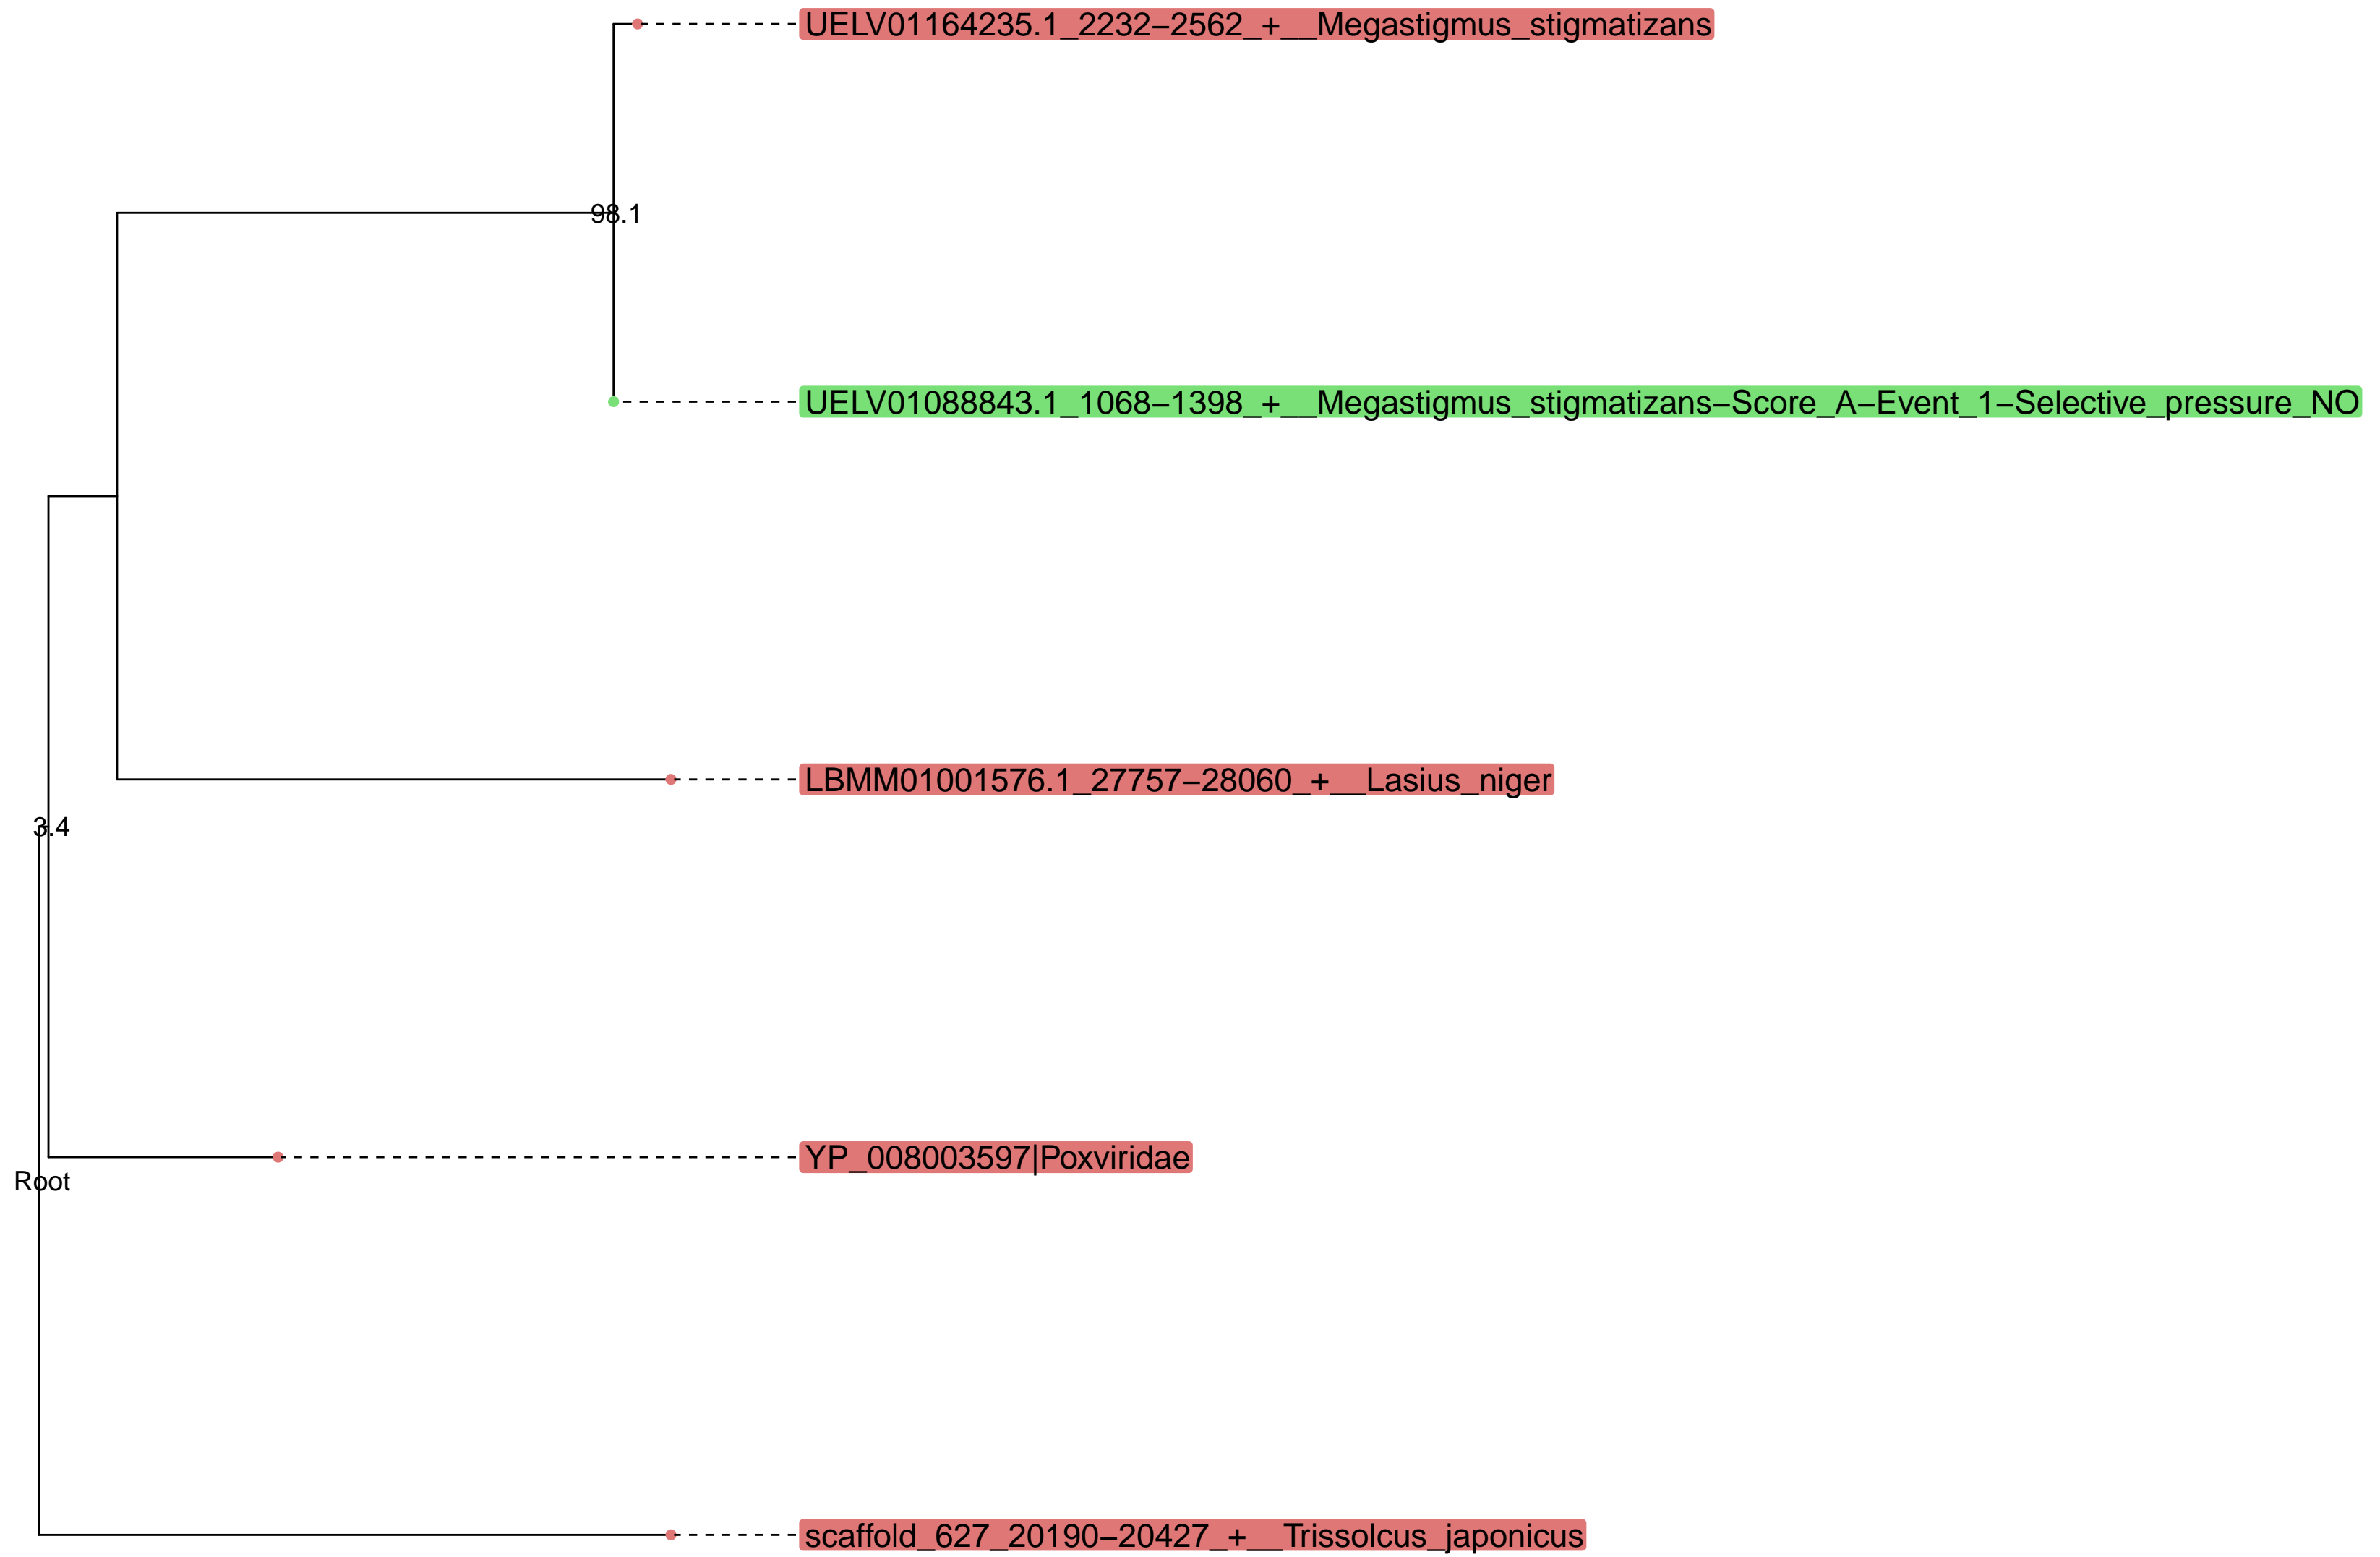



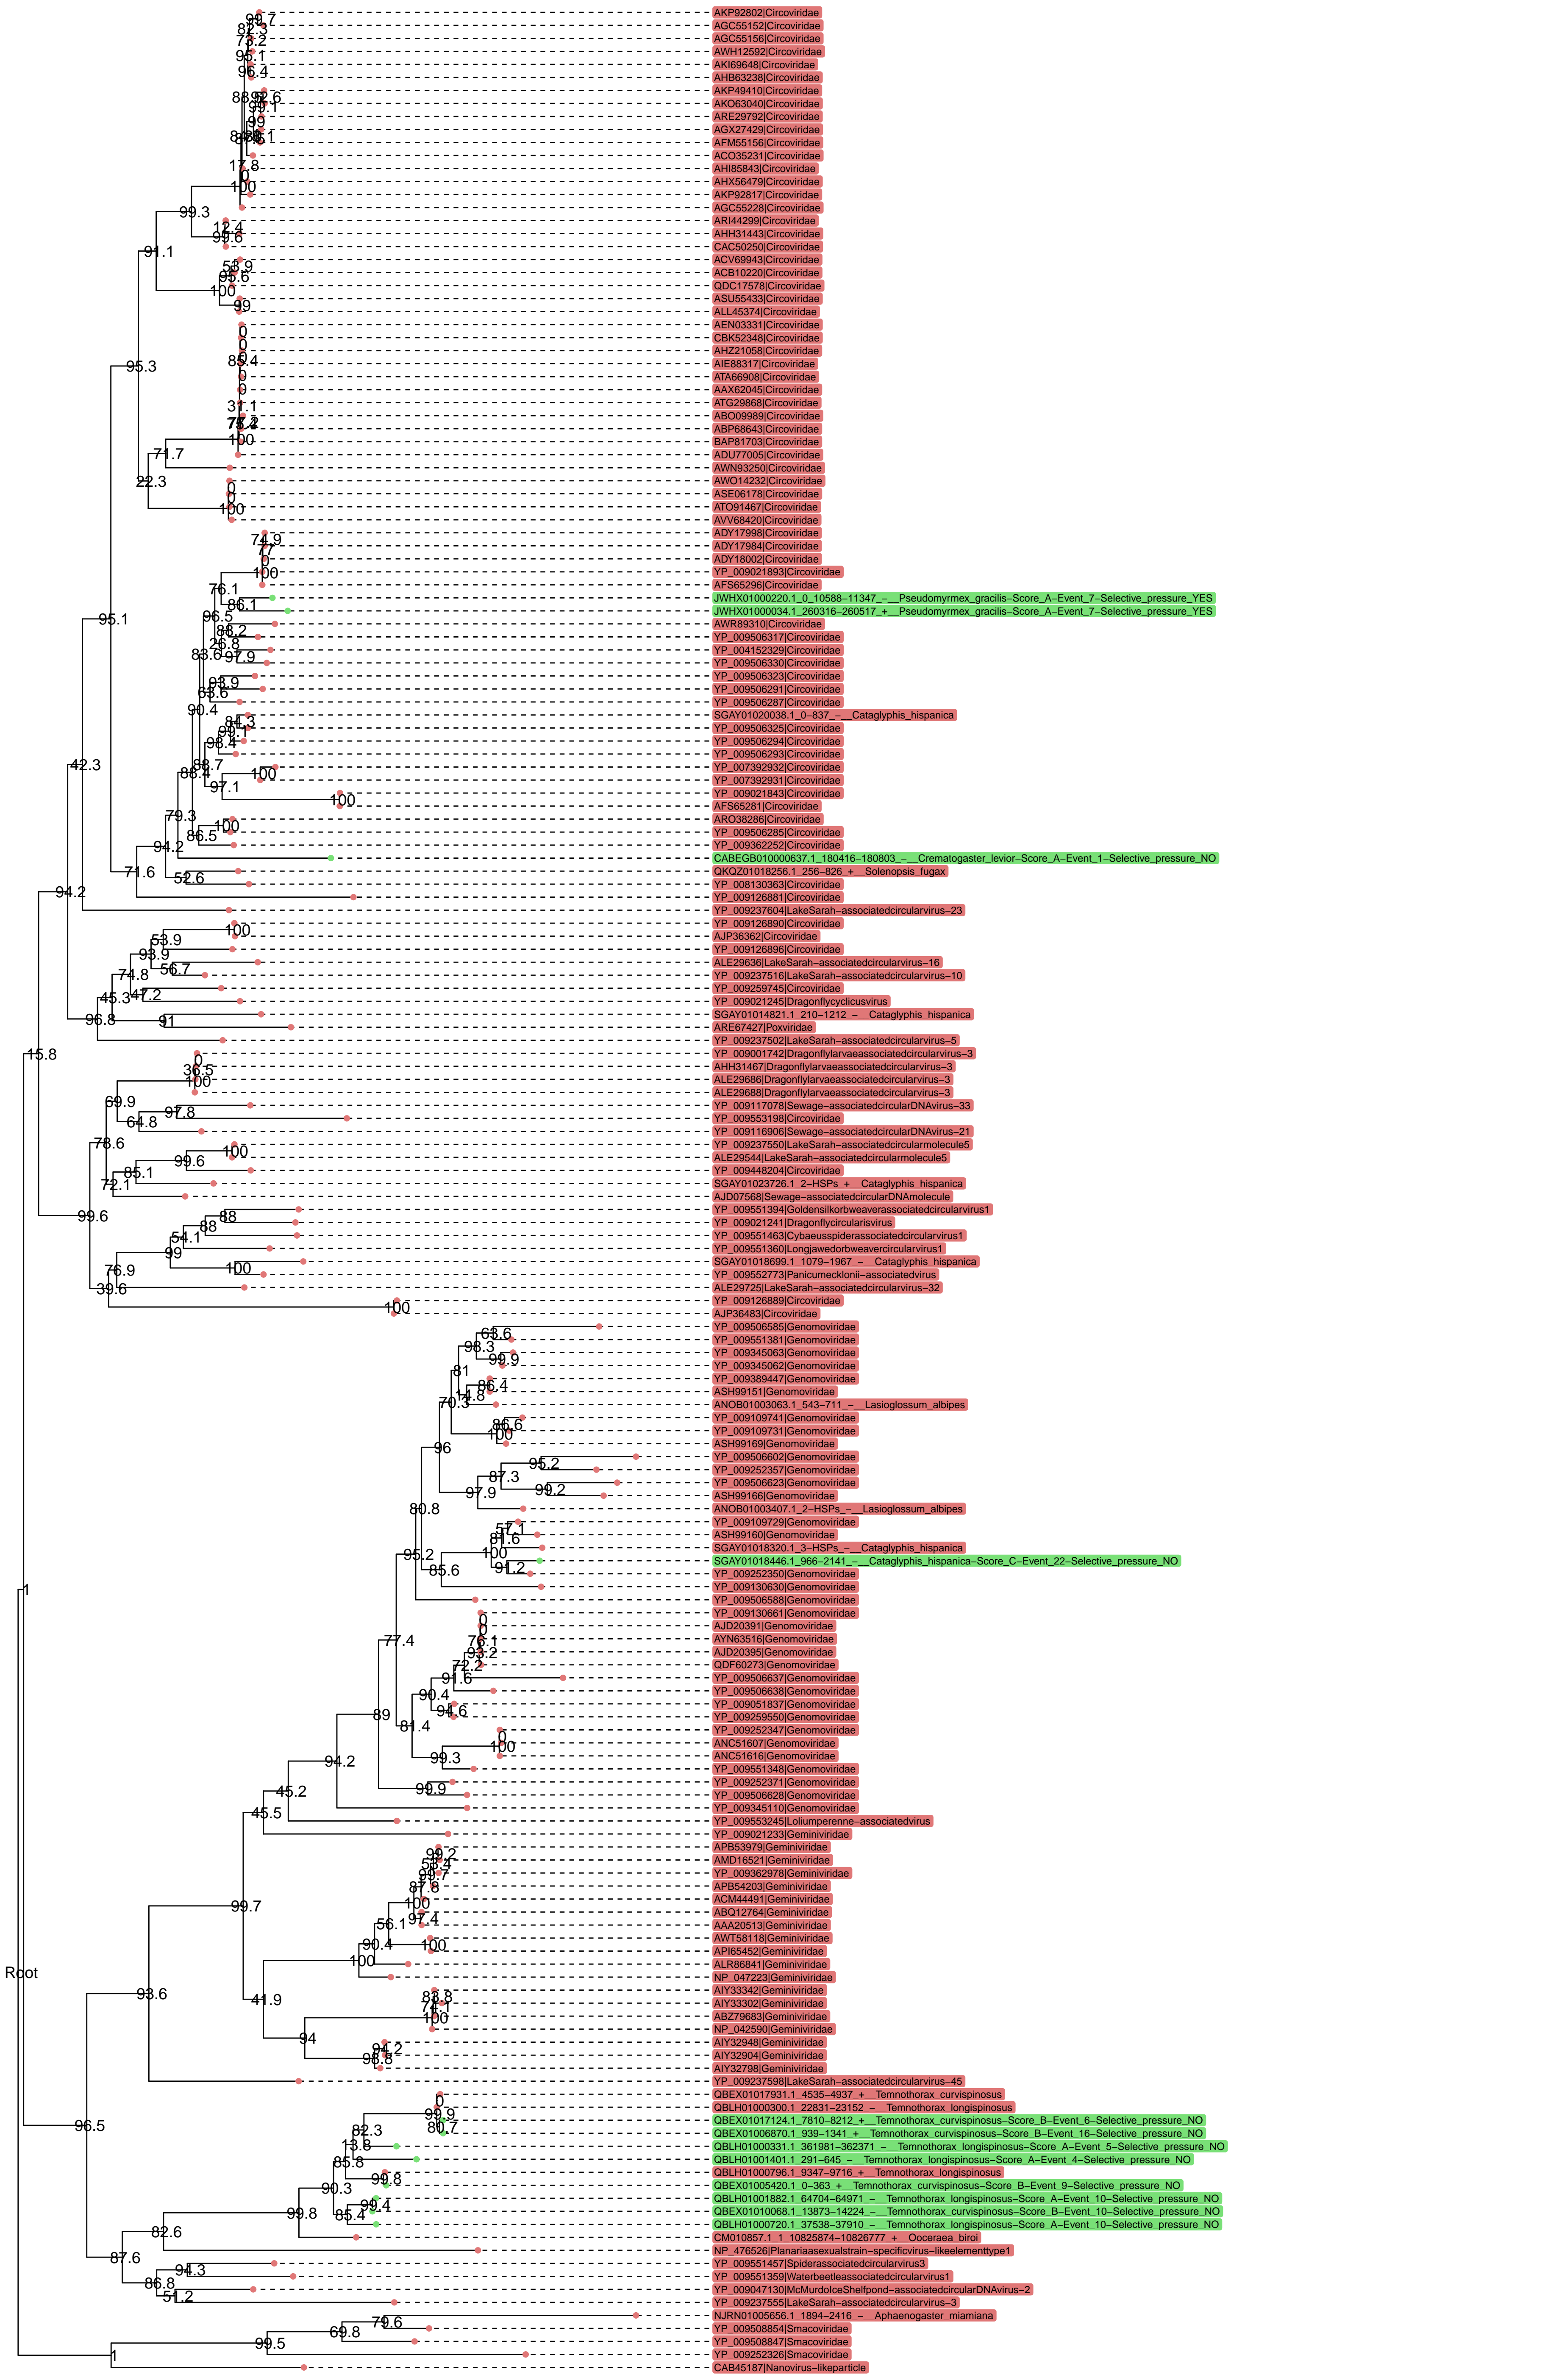

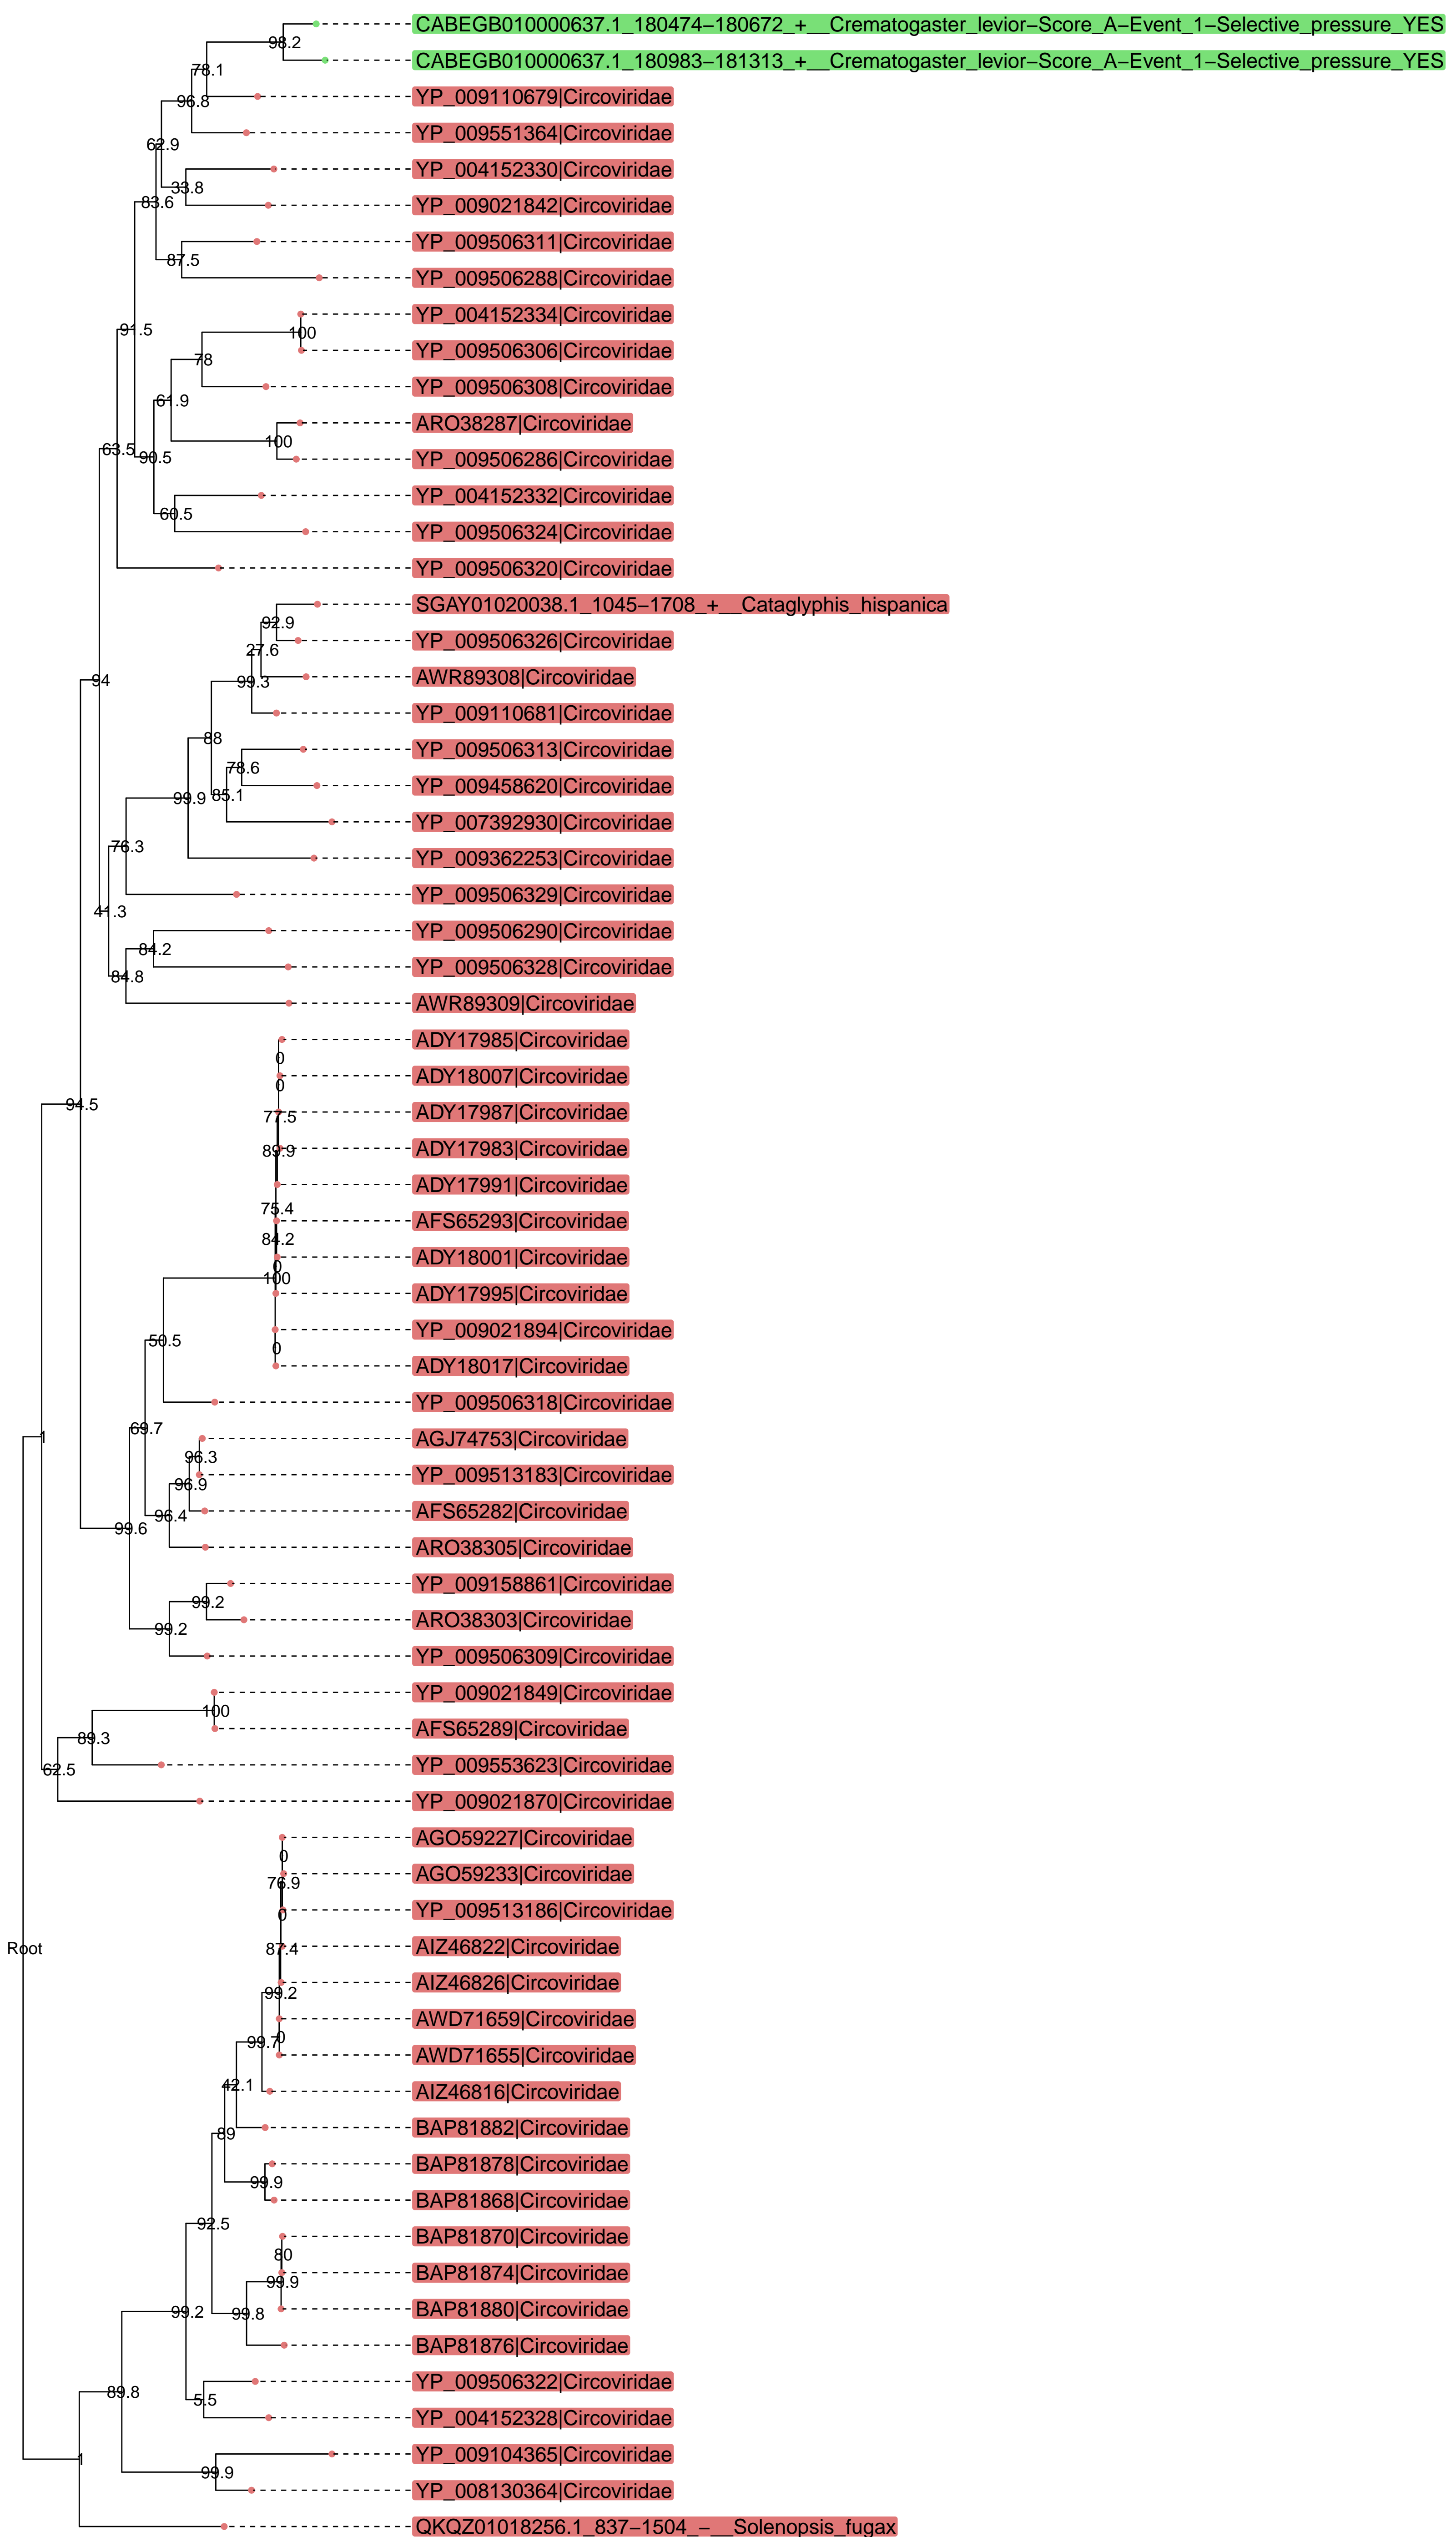

Cluster9821 – families involved : ['Nudiviridae'] – putative protein : ['GrBNV\_gp43-like protein']

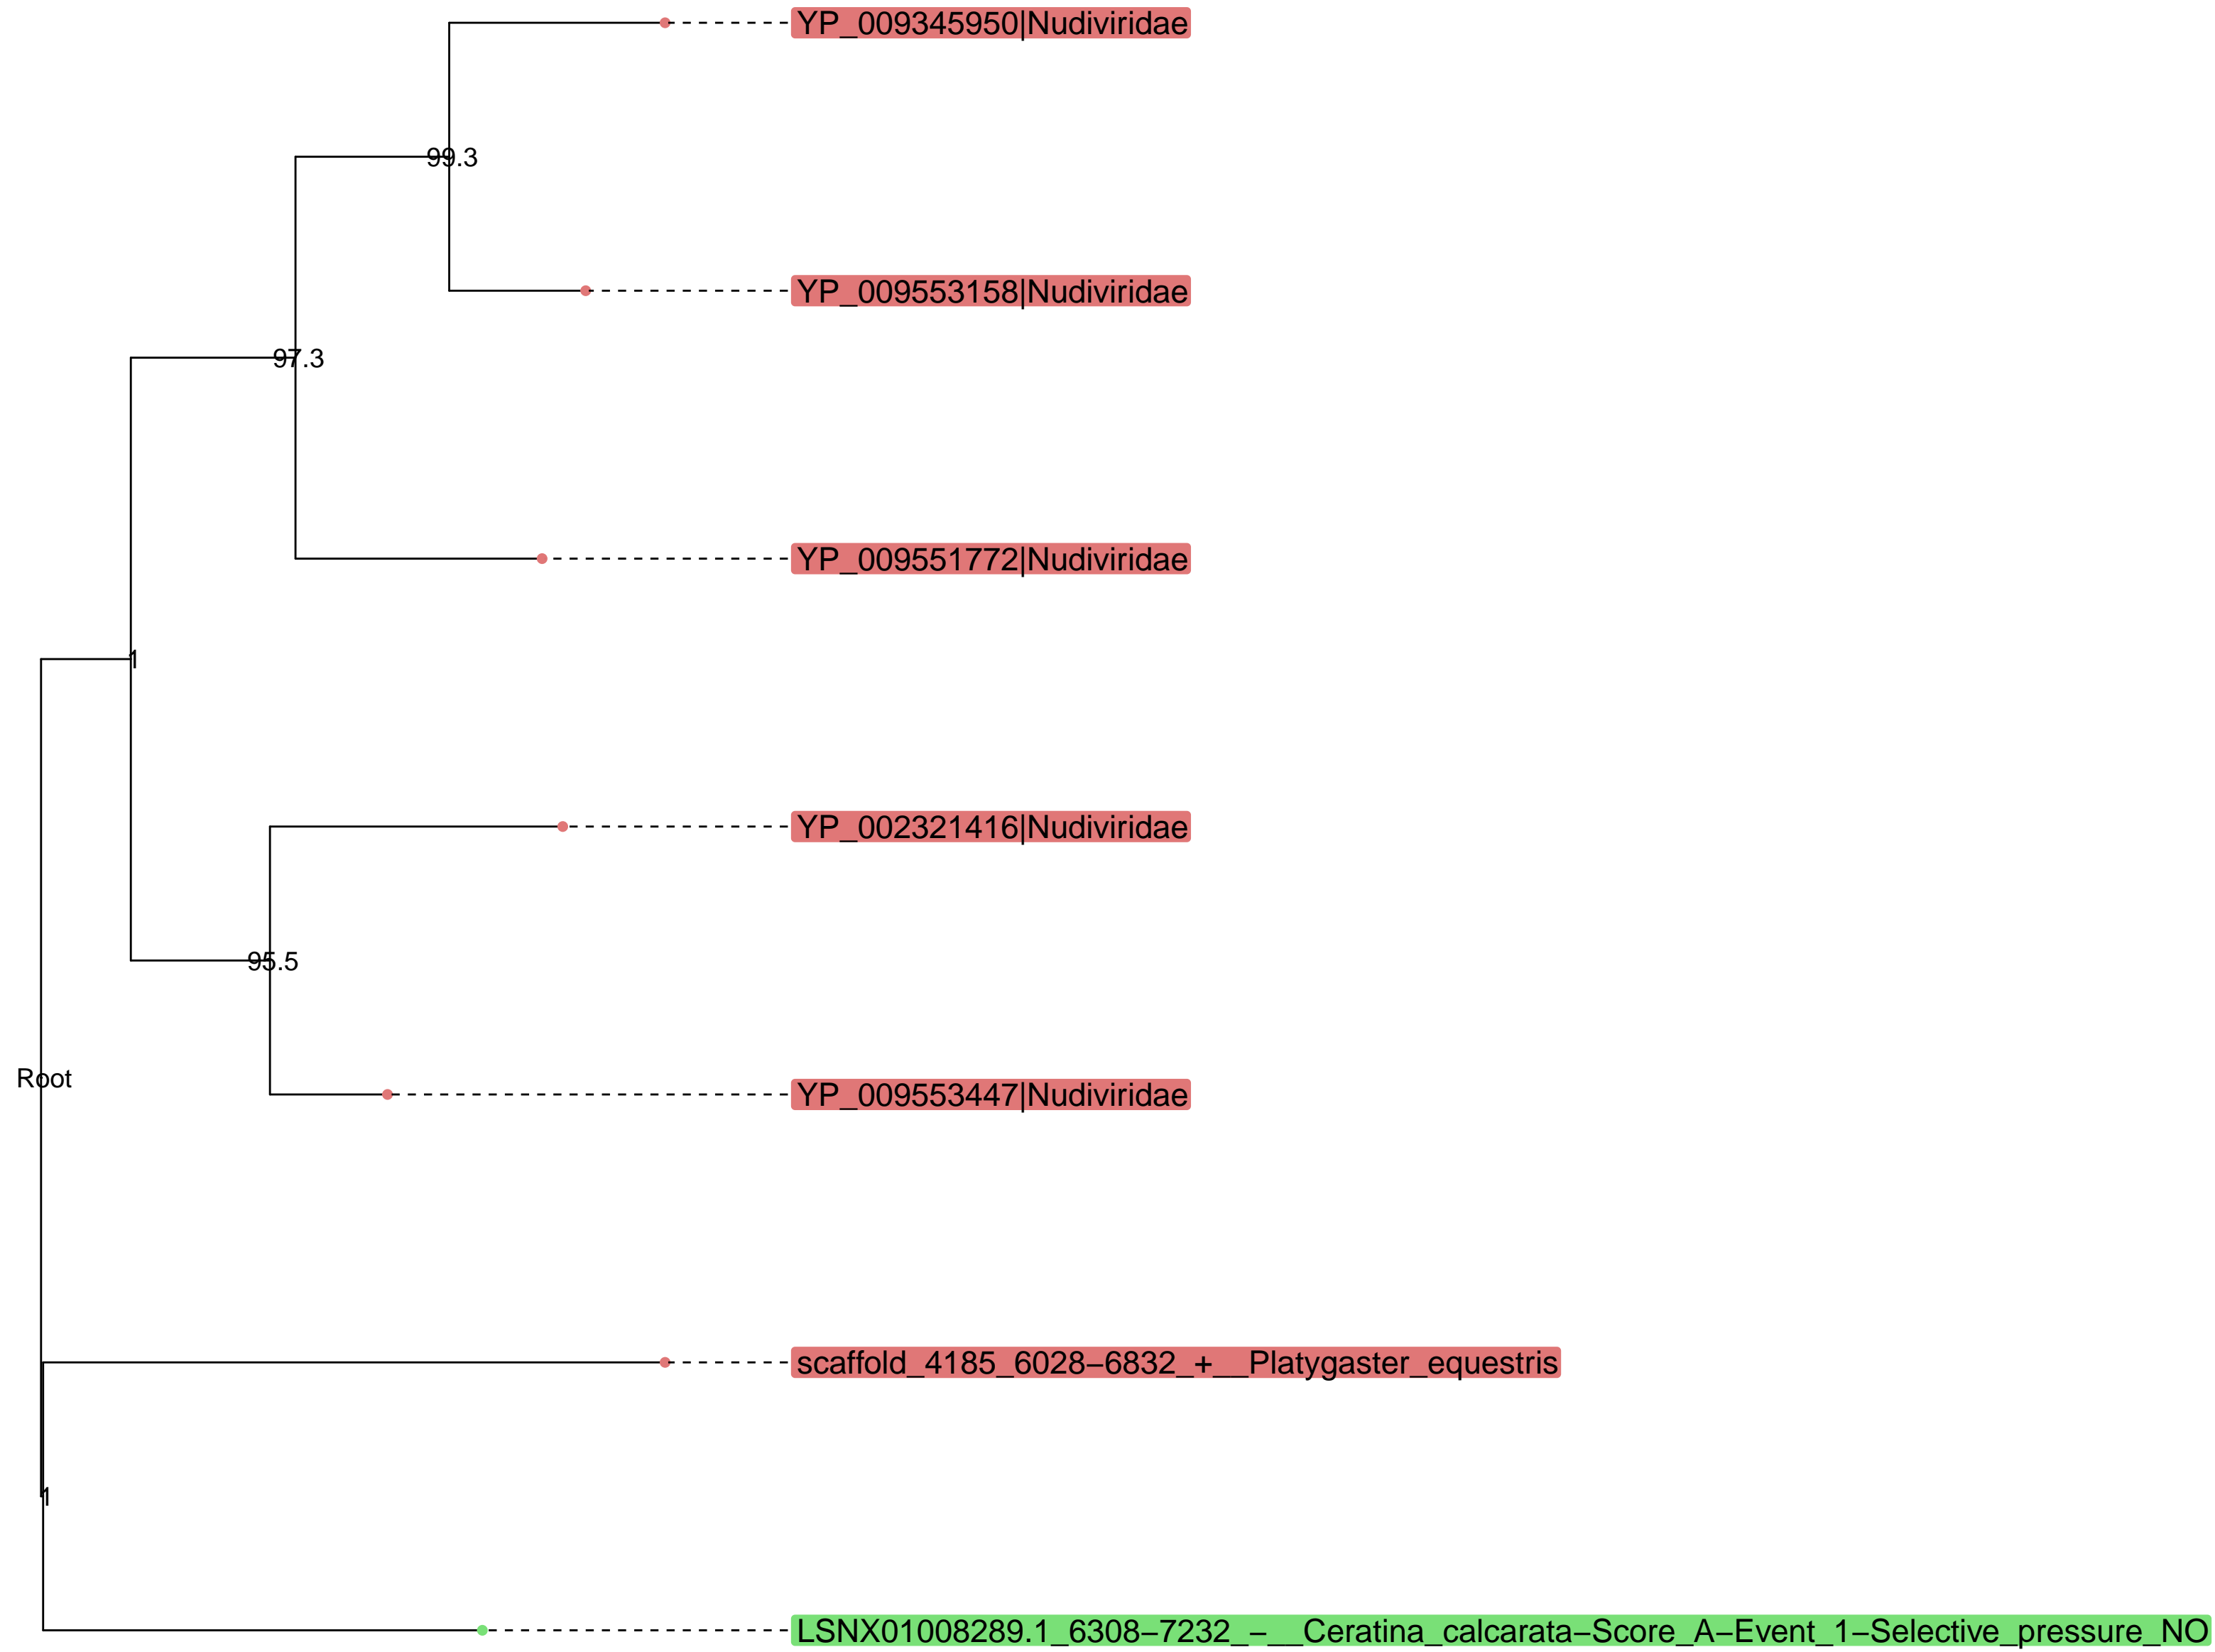

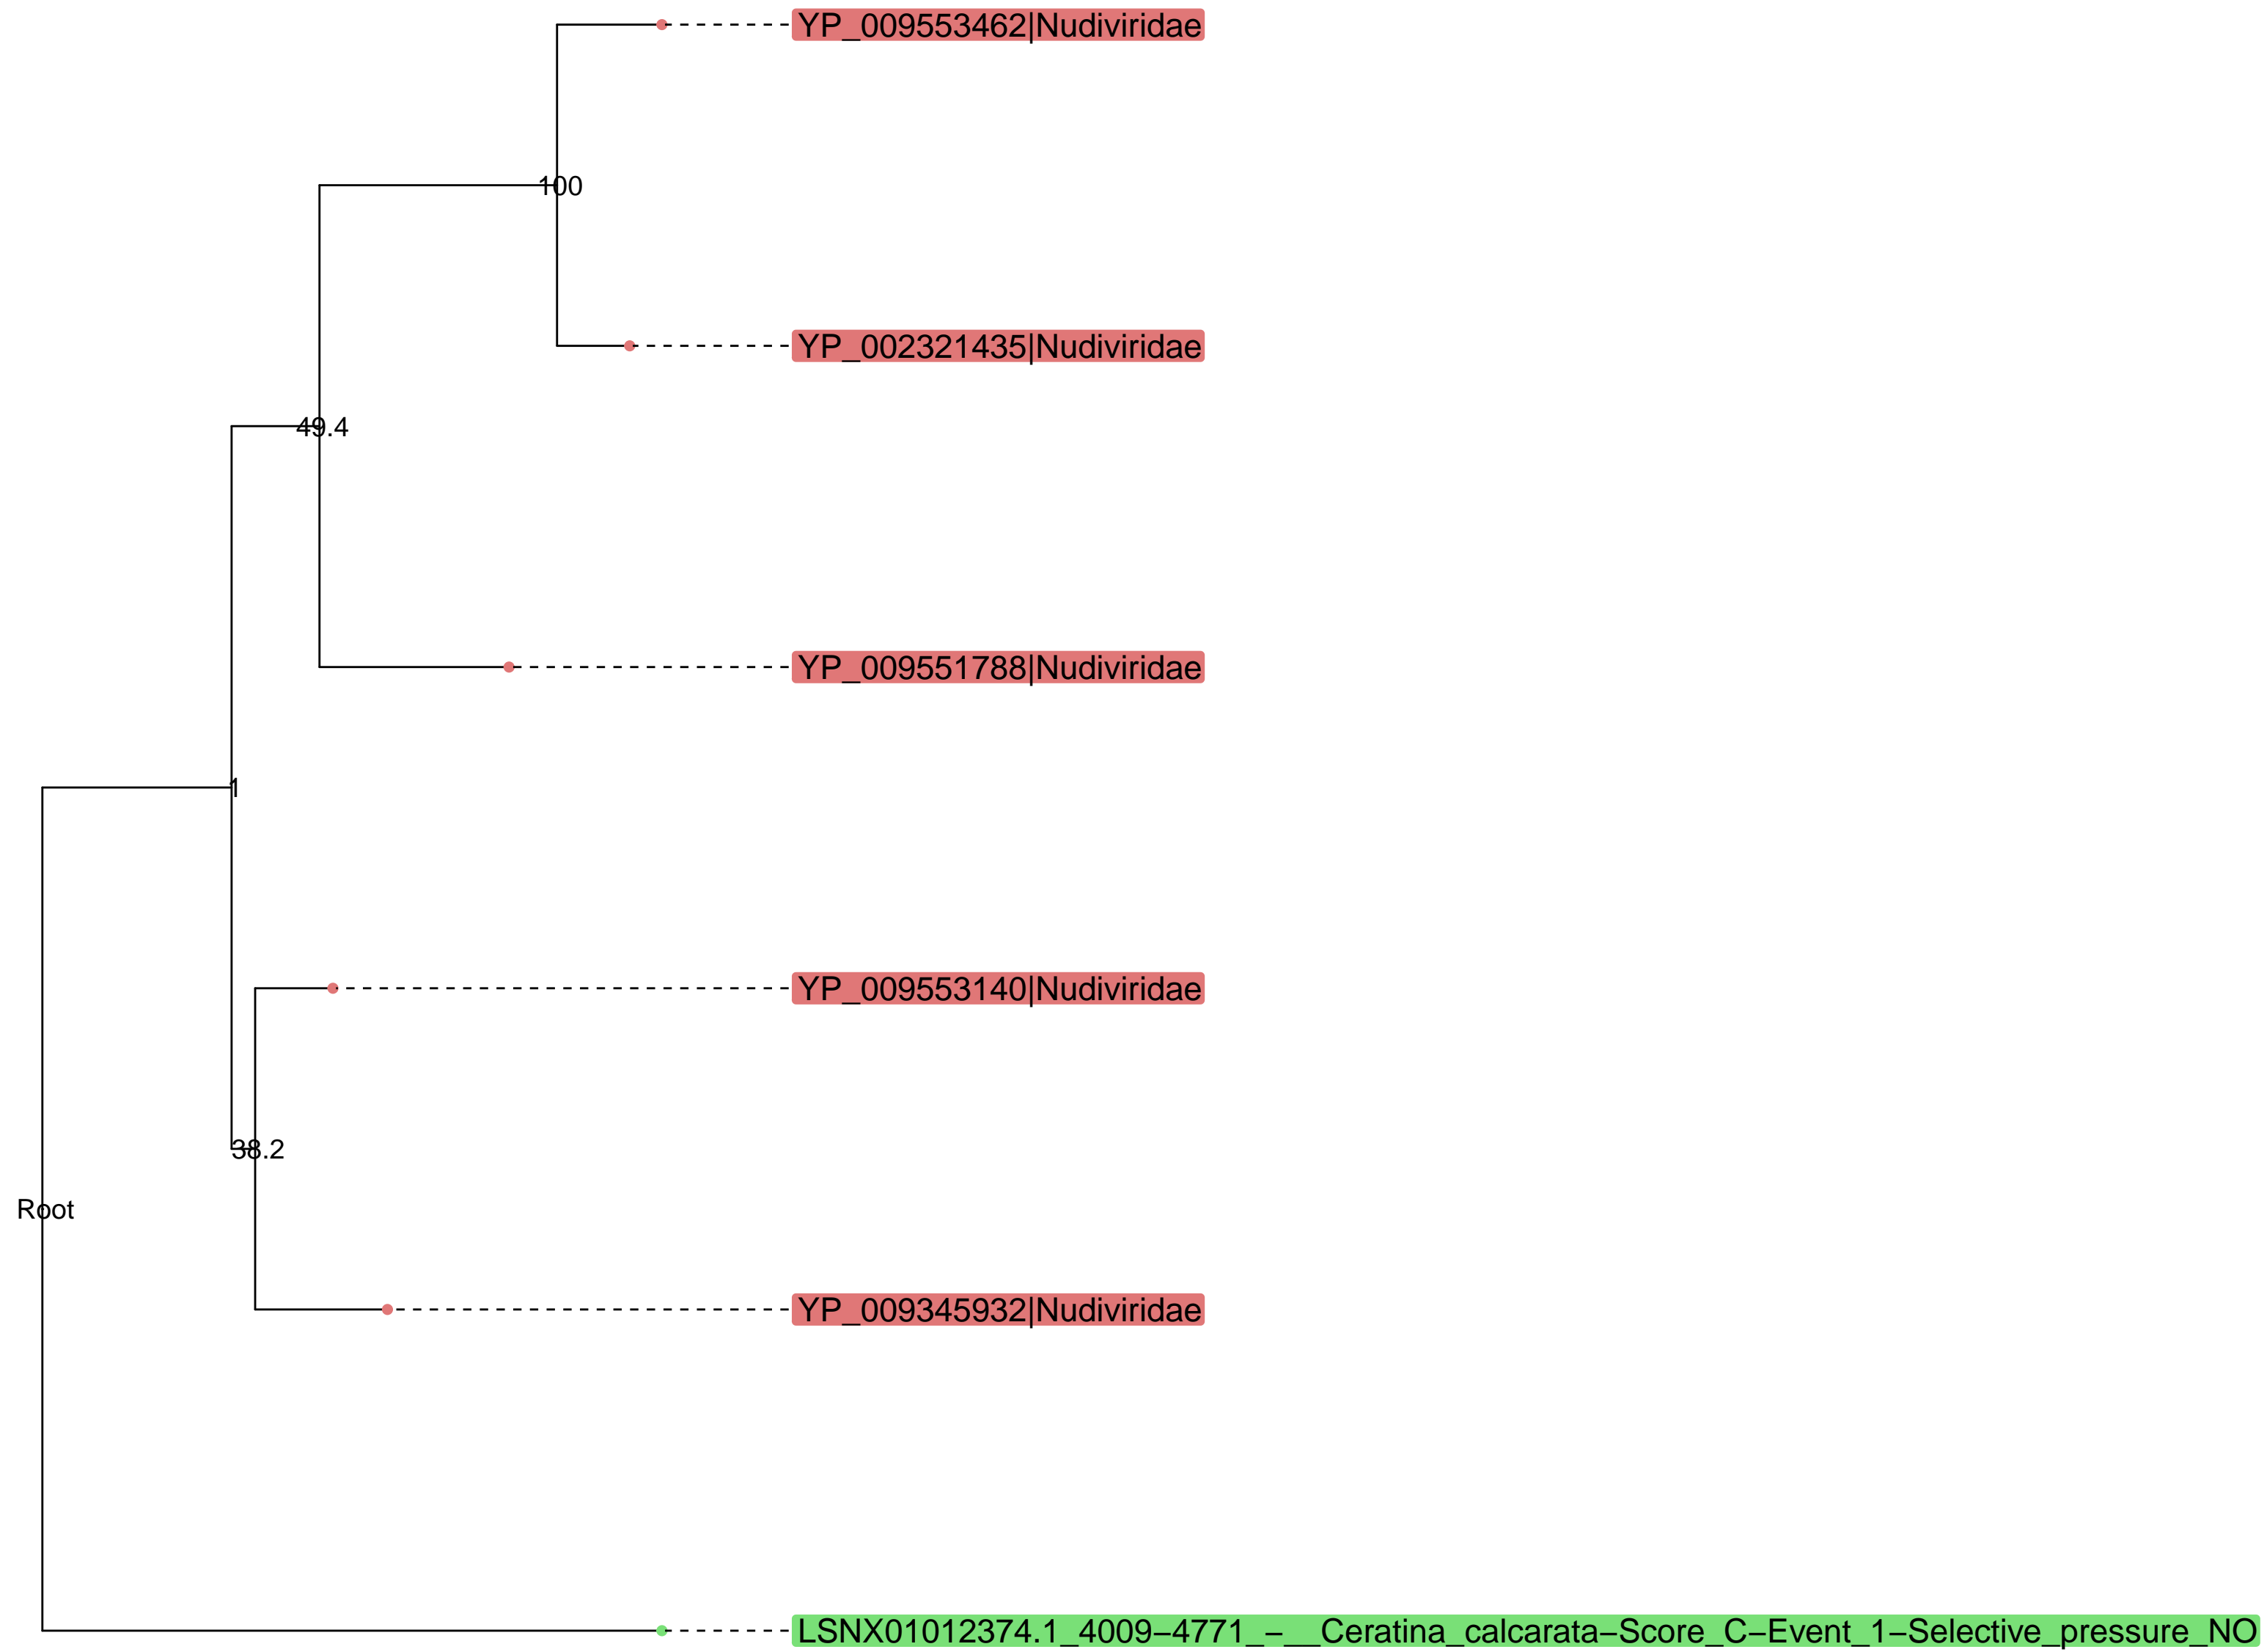

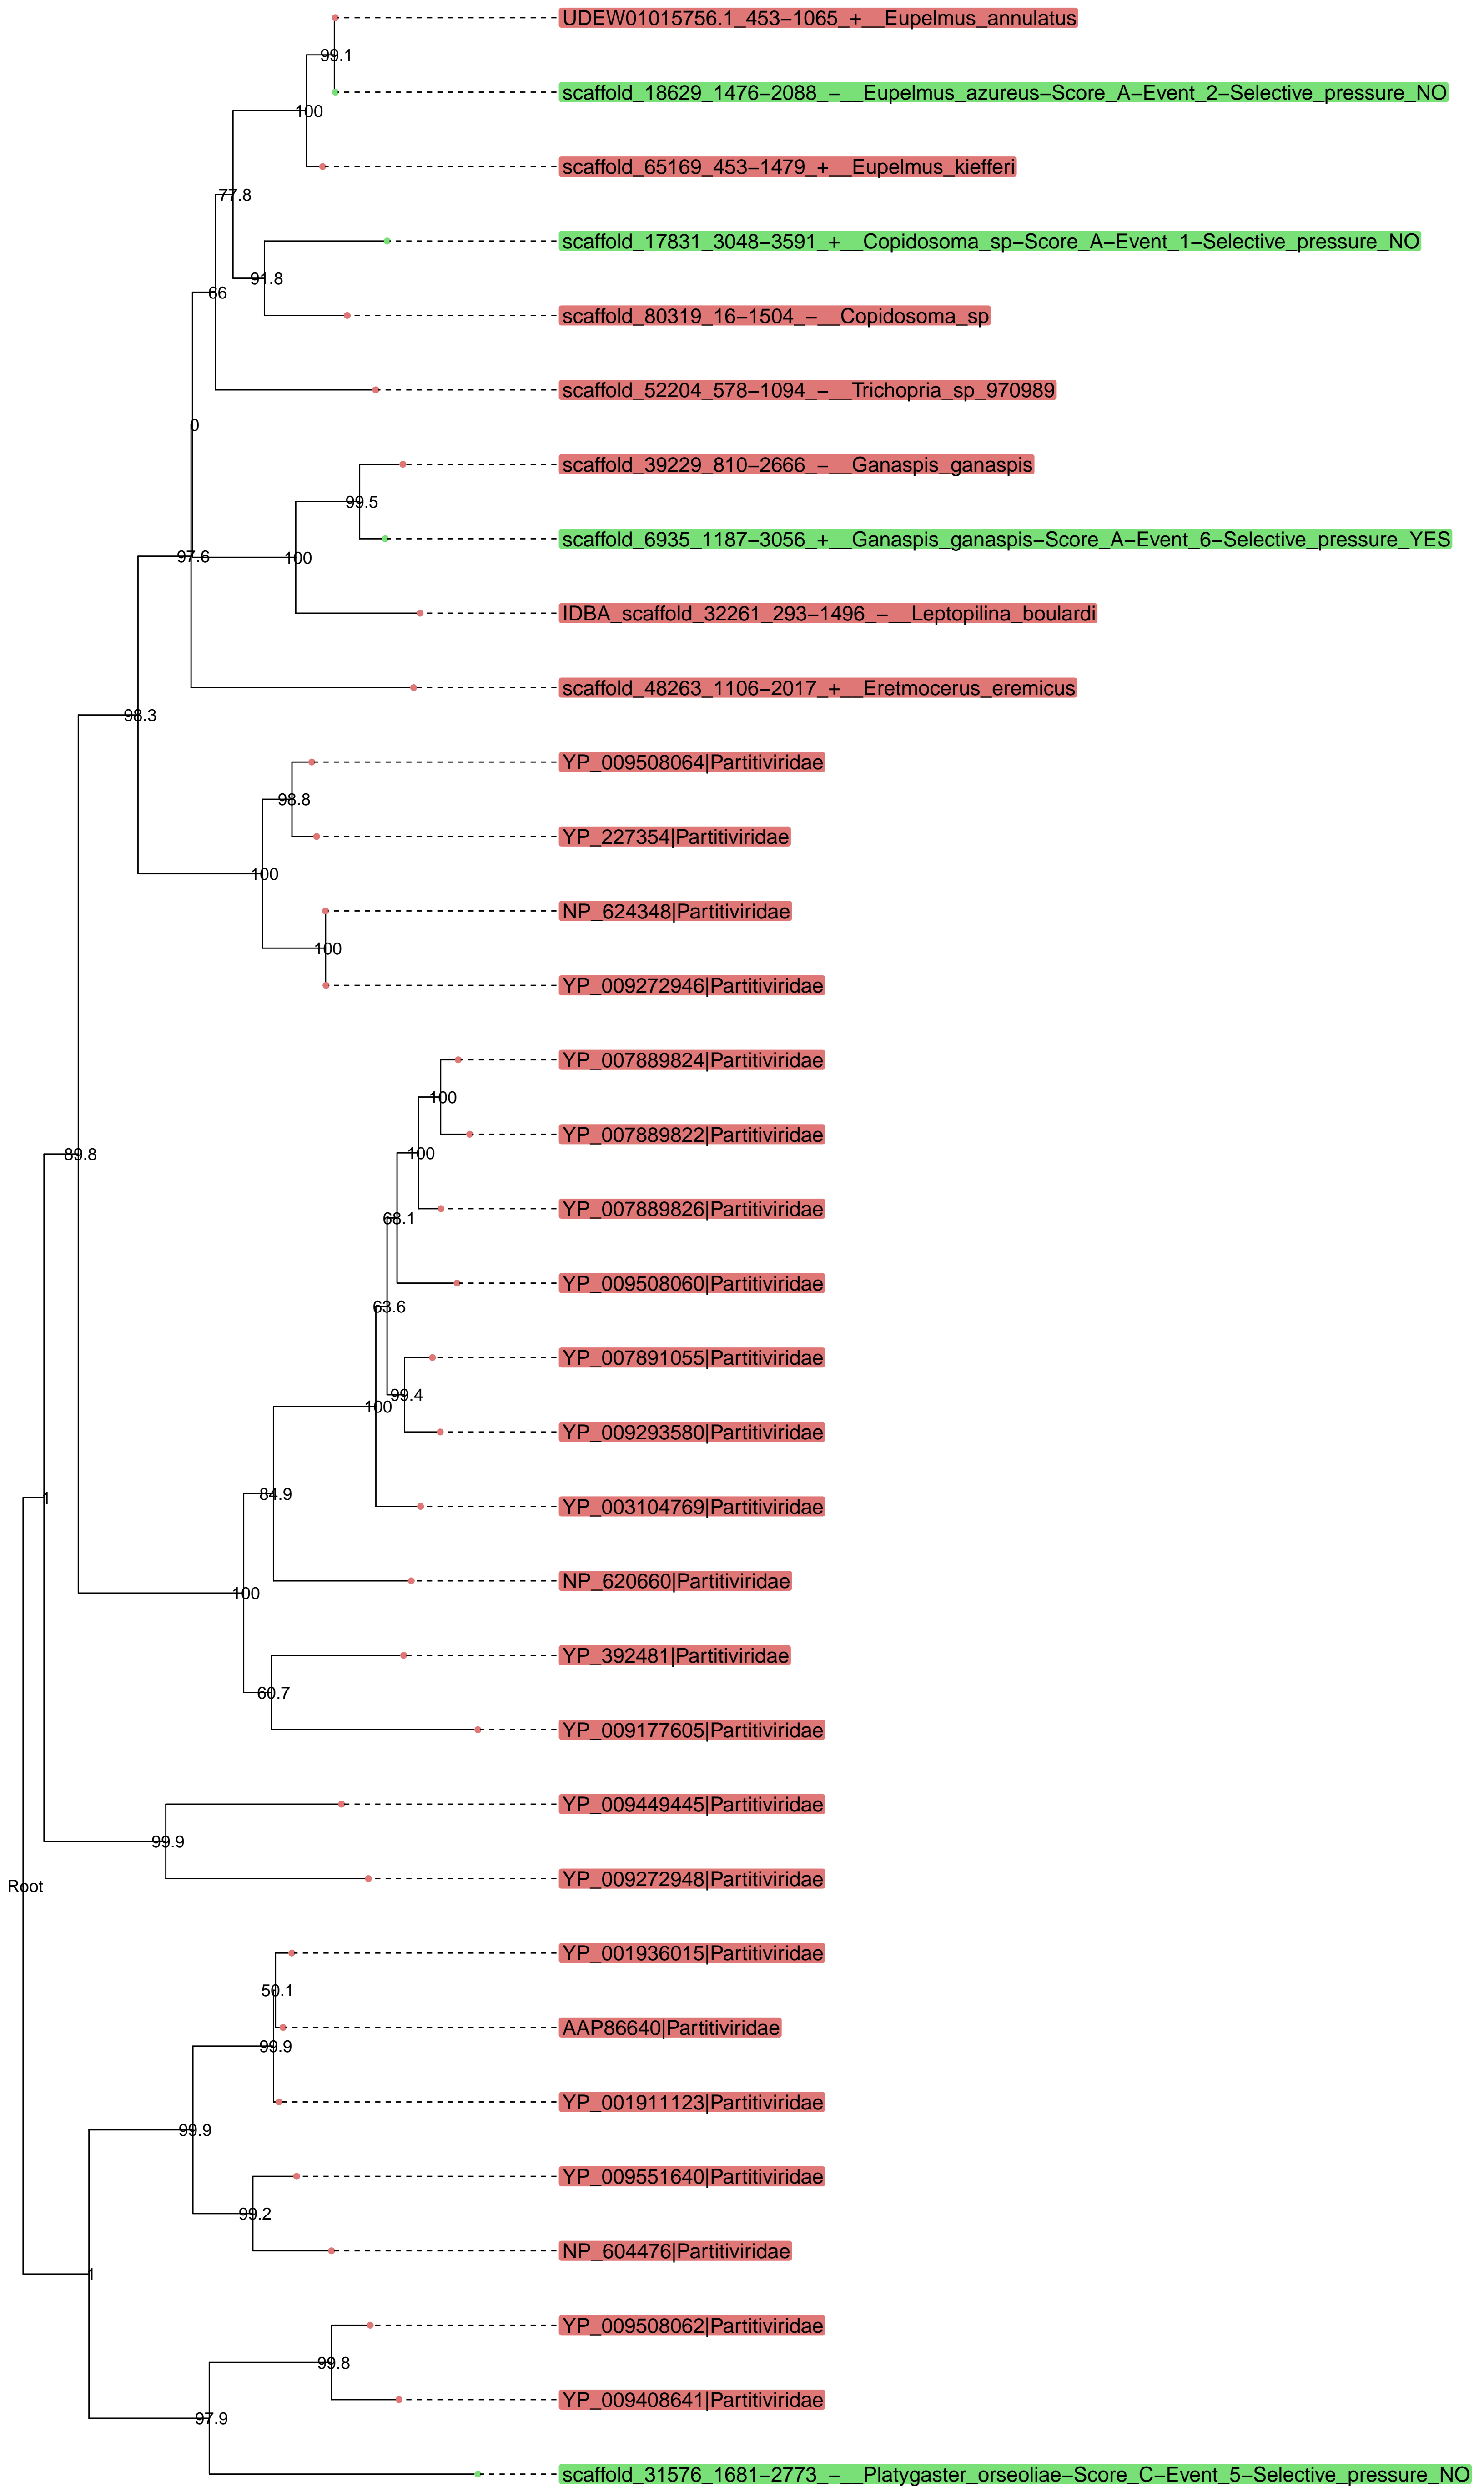

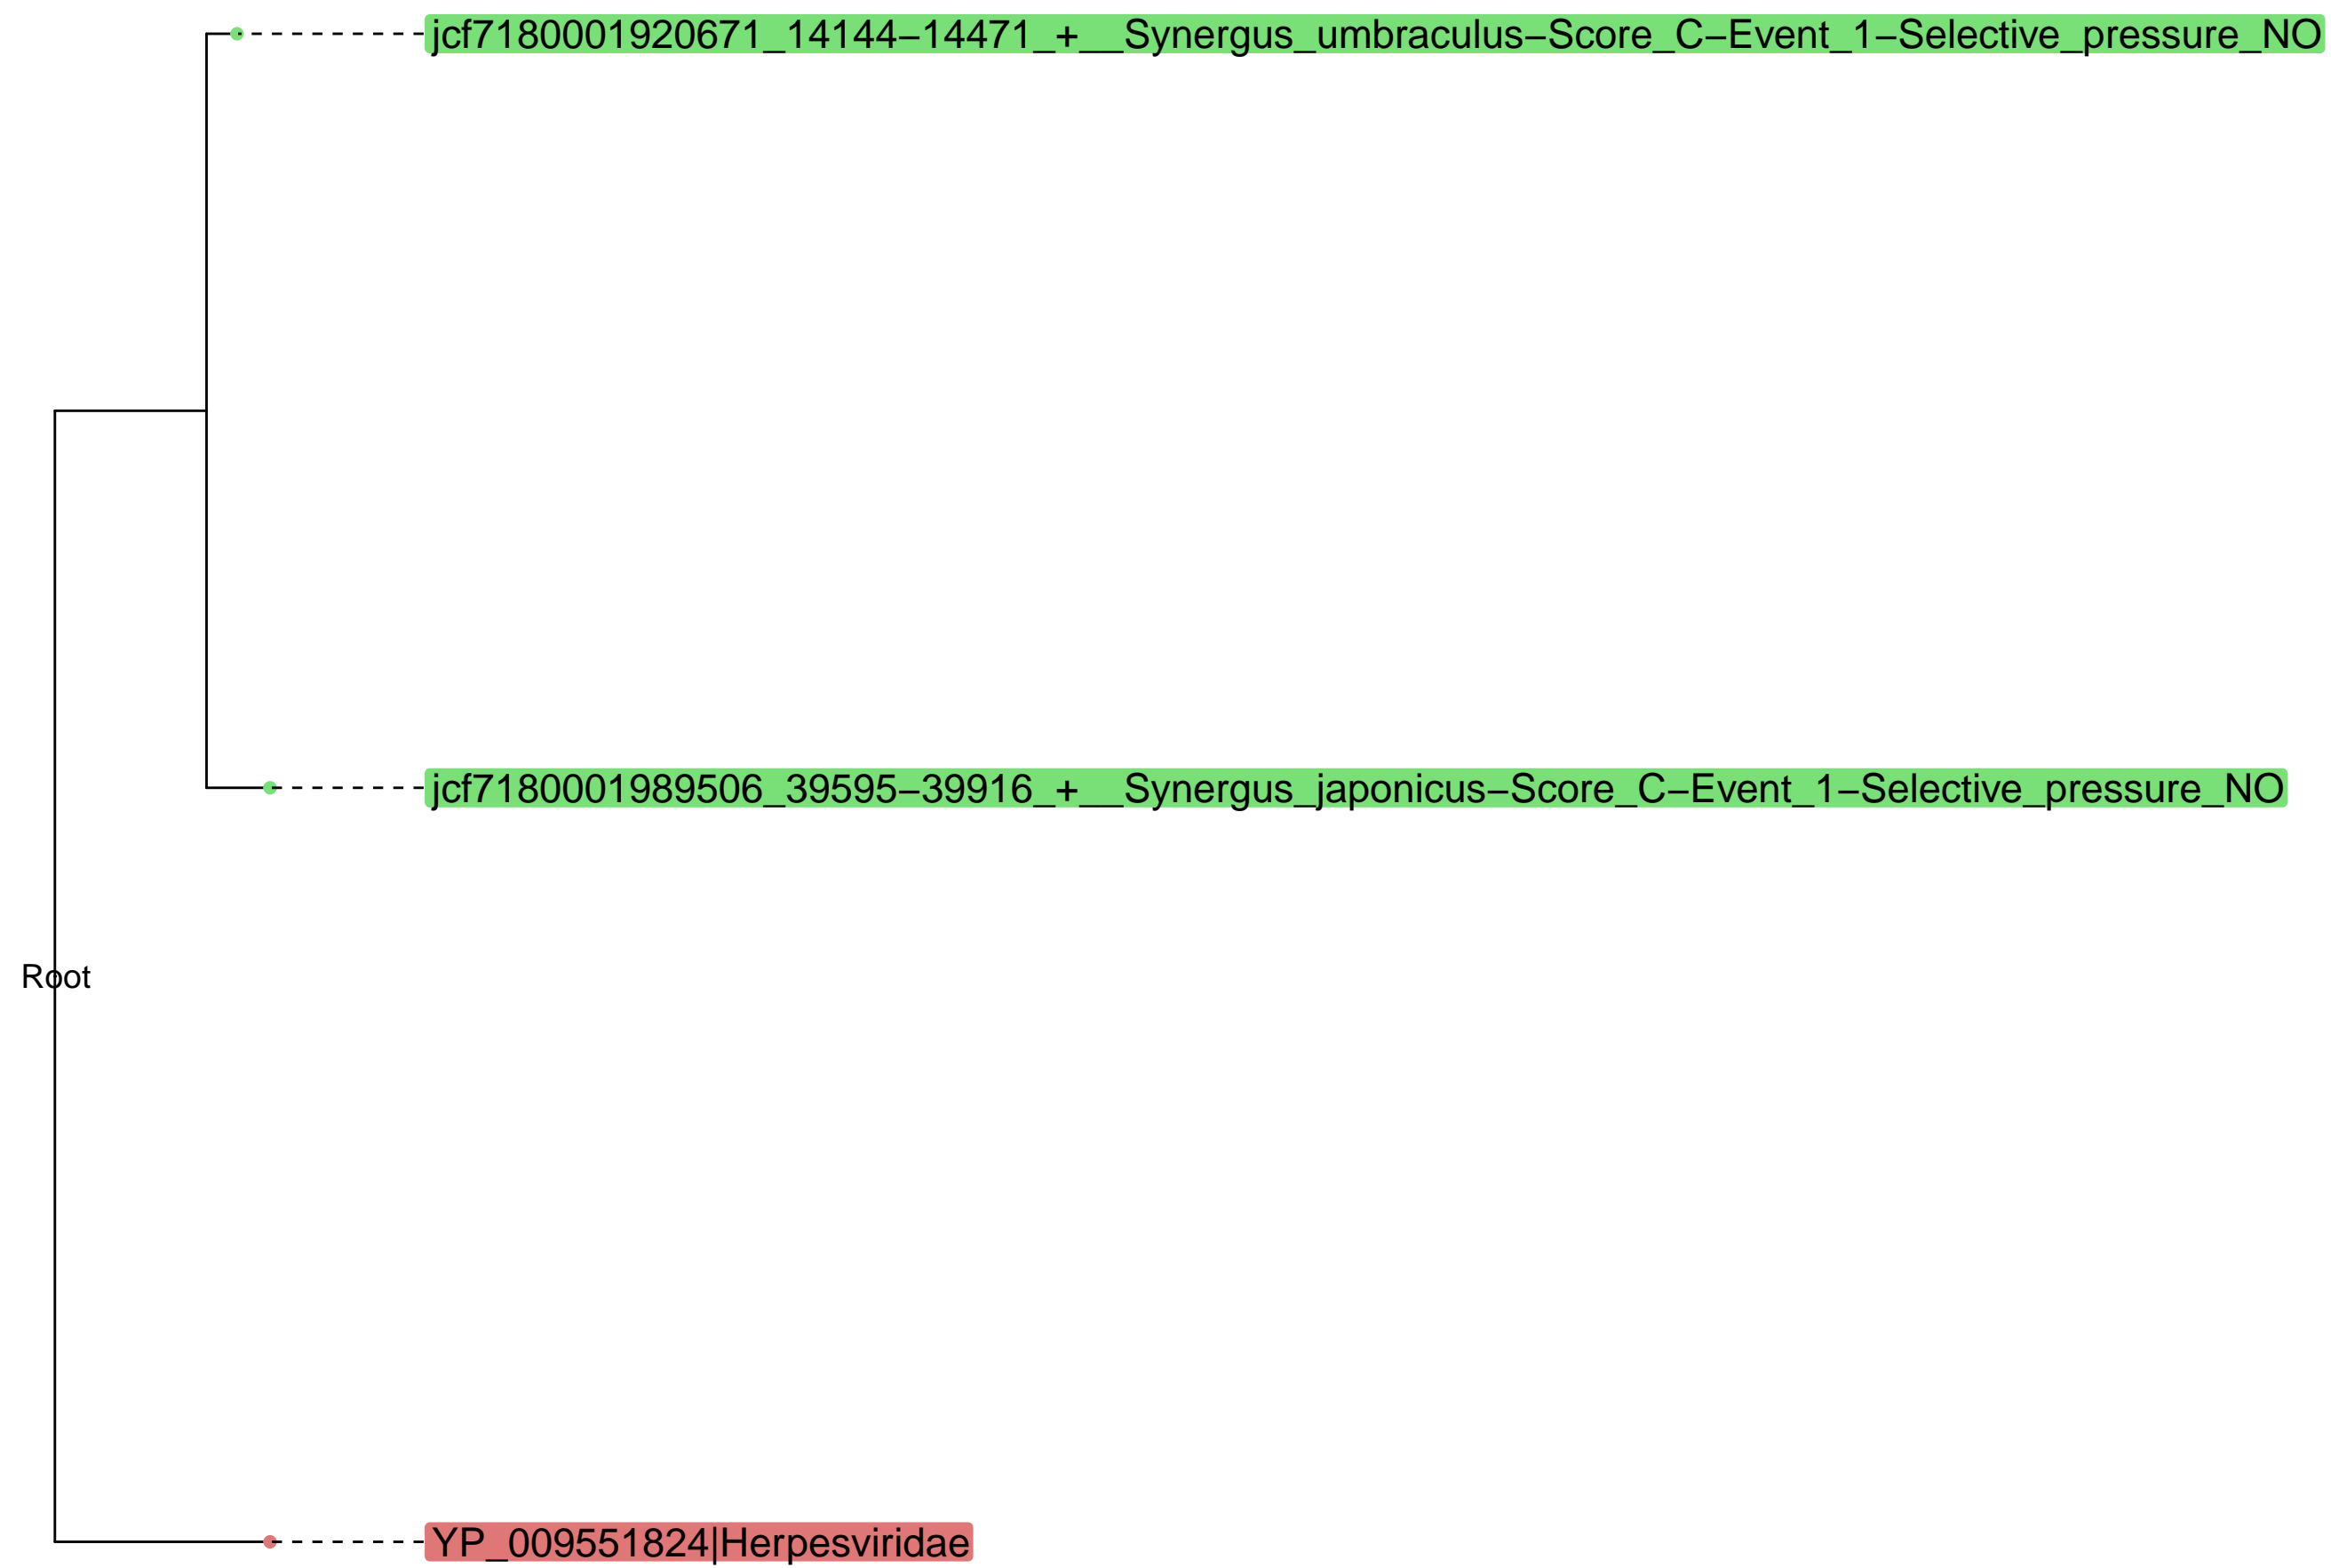

Cluster21728 – families involved : ['Orthomyxoviridae'] – putative protein : ['Nucleoprotein']

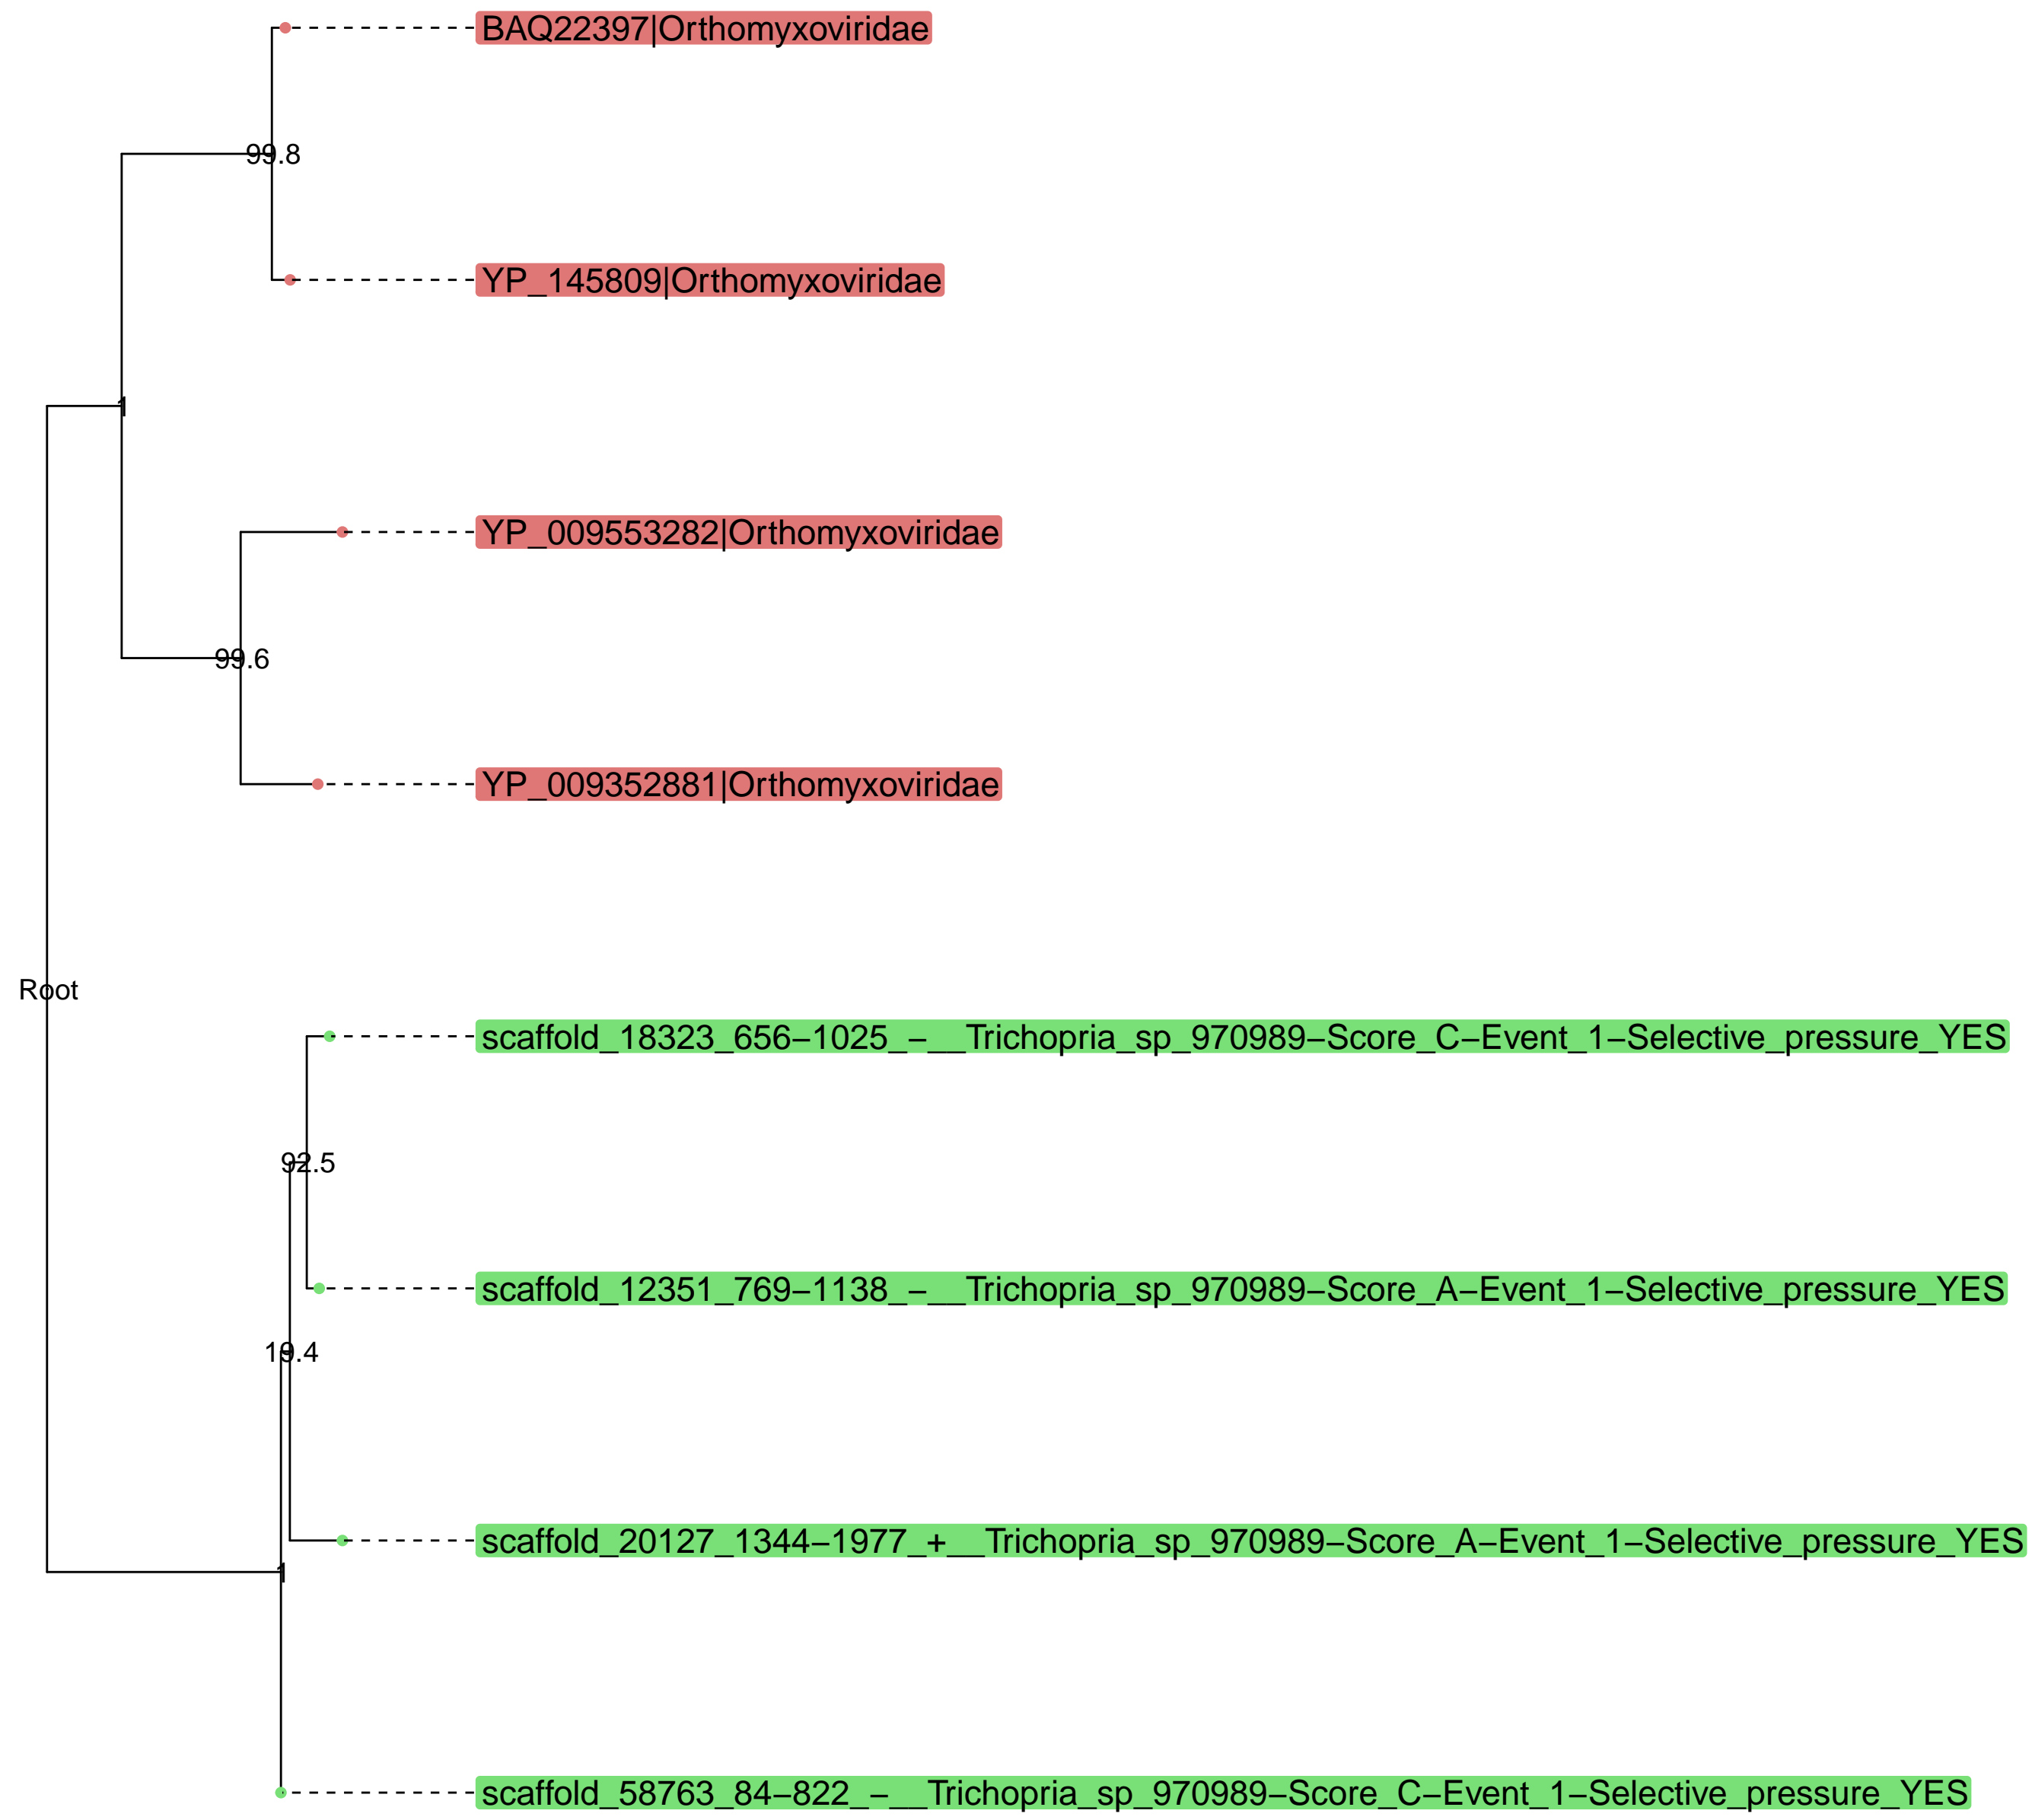

Cluster21304 – families involved : ['Unknown'] – putative protein : ['Proline–alanine–rich protein']

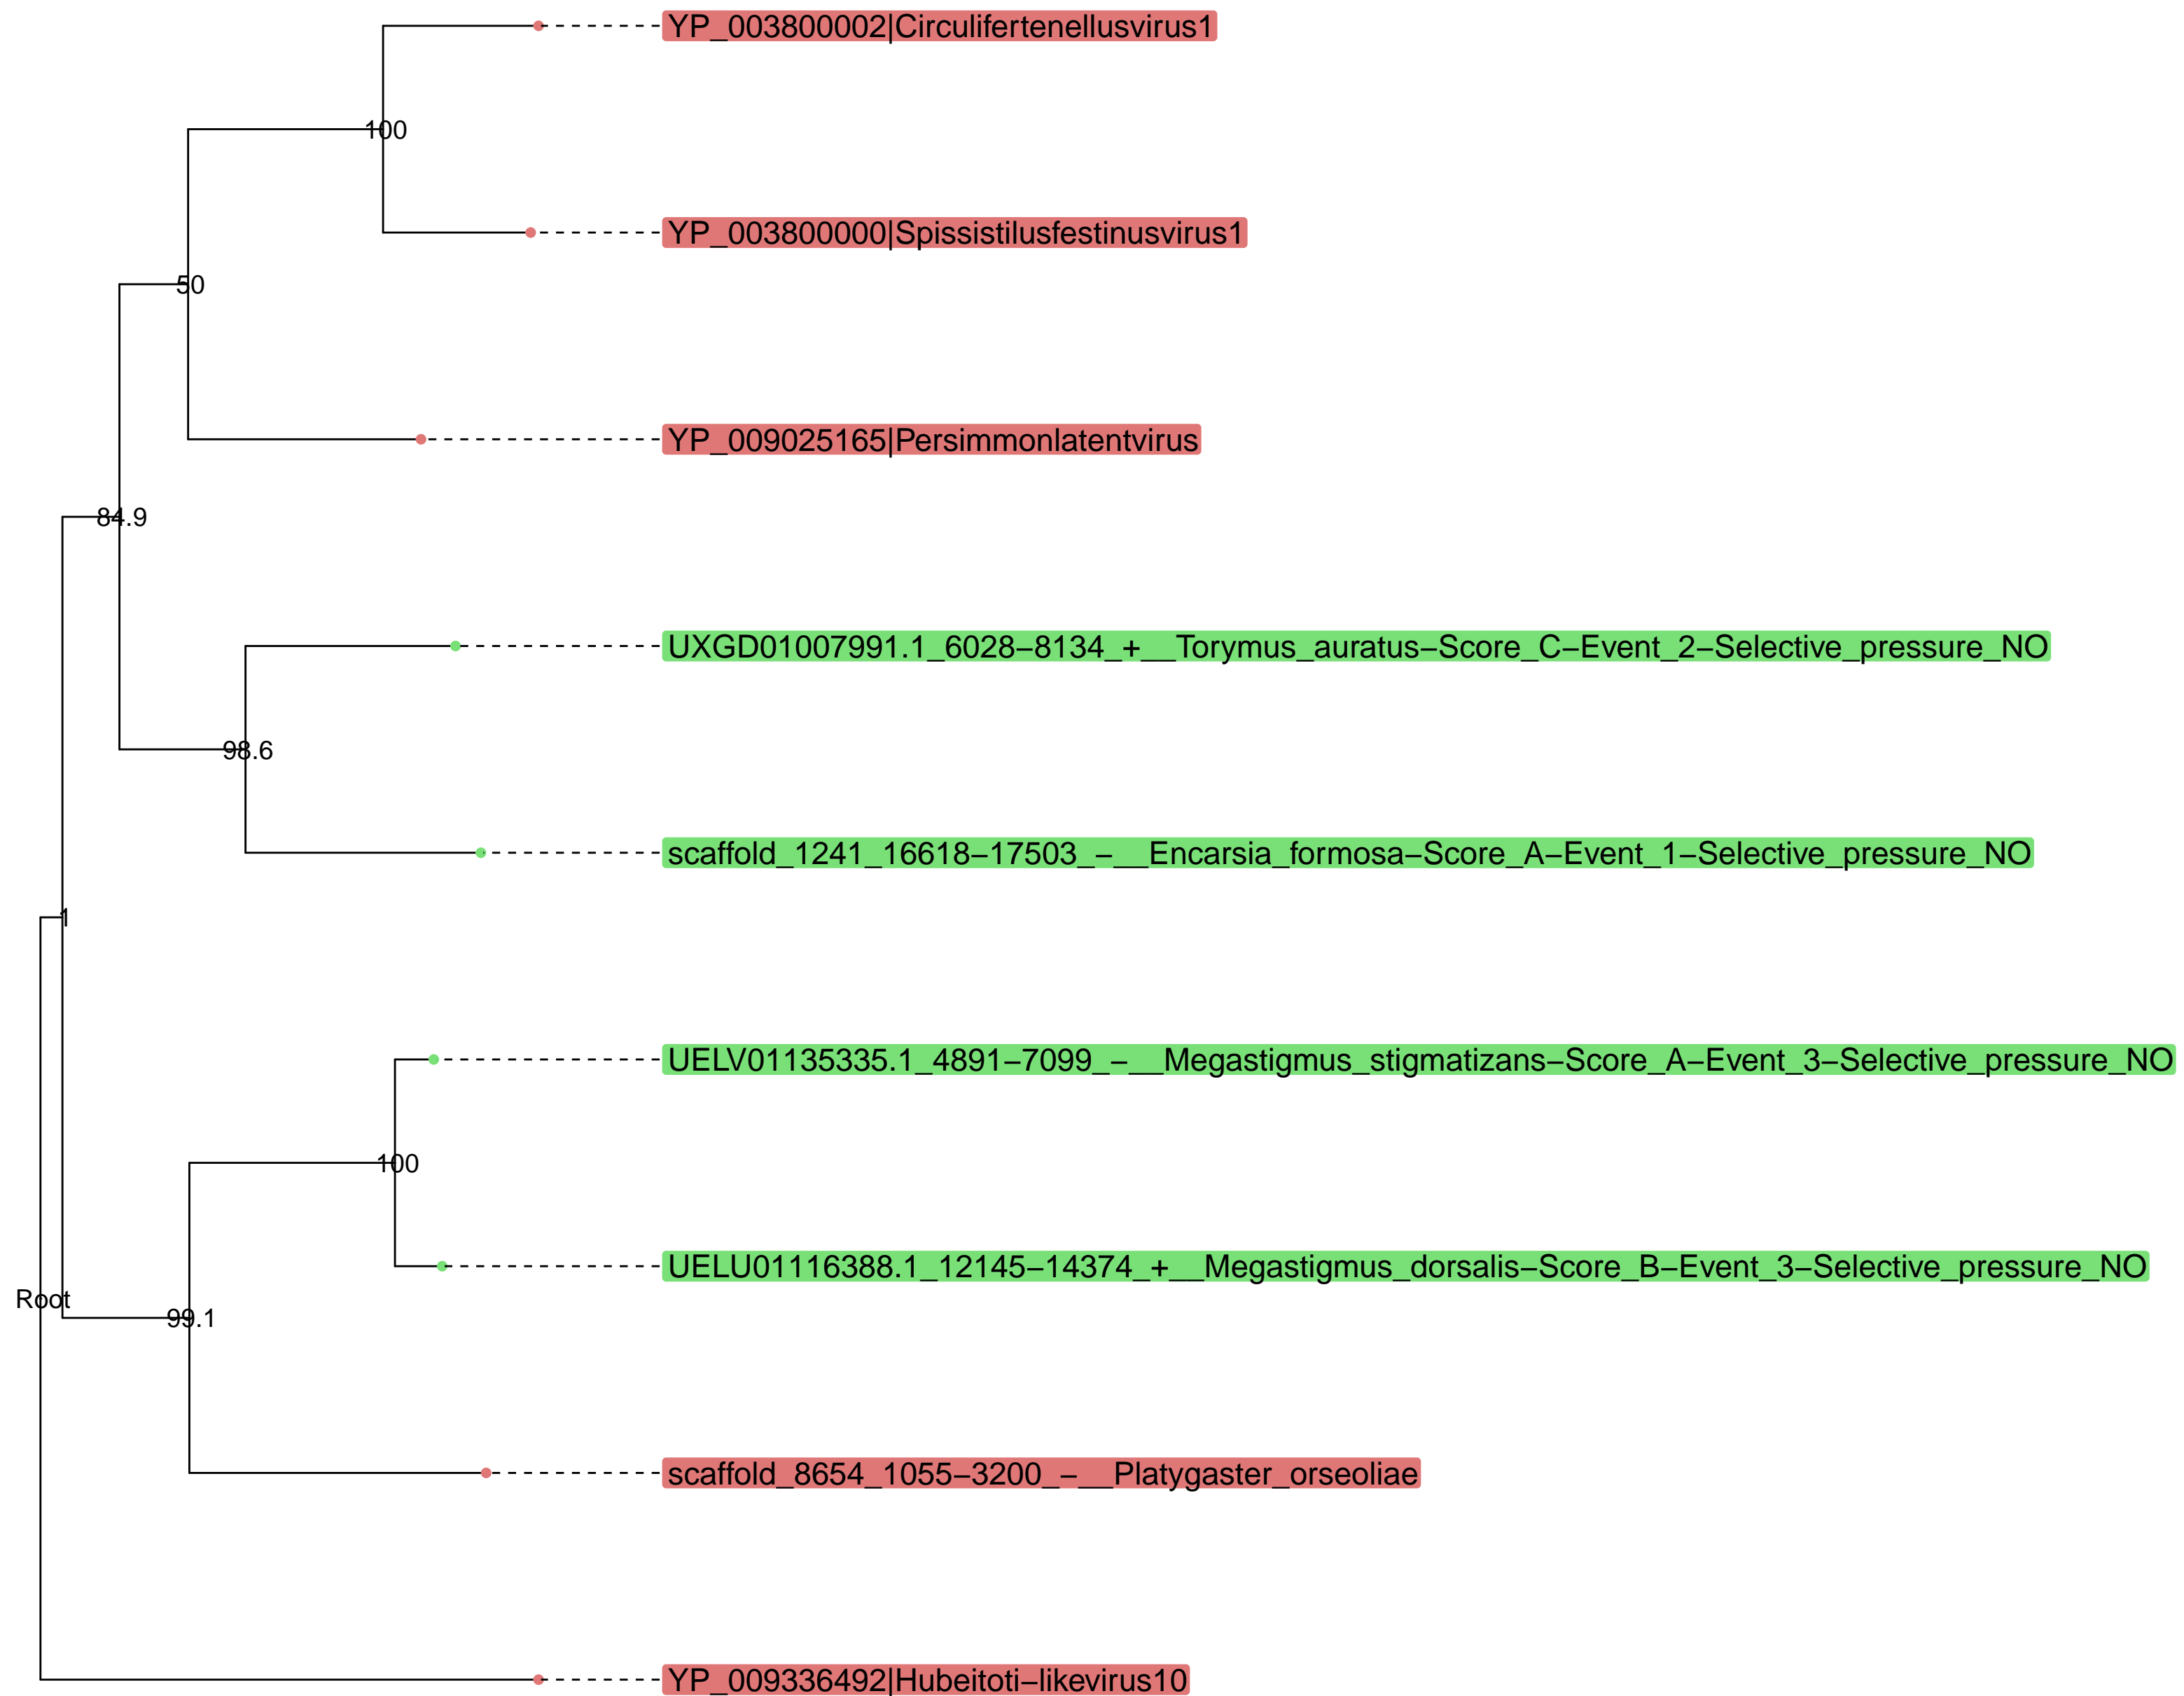



Cluster20940 – families involved : ['Chuviridae'] – putative protein : ['Myelin transcription factor 1']

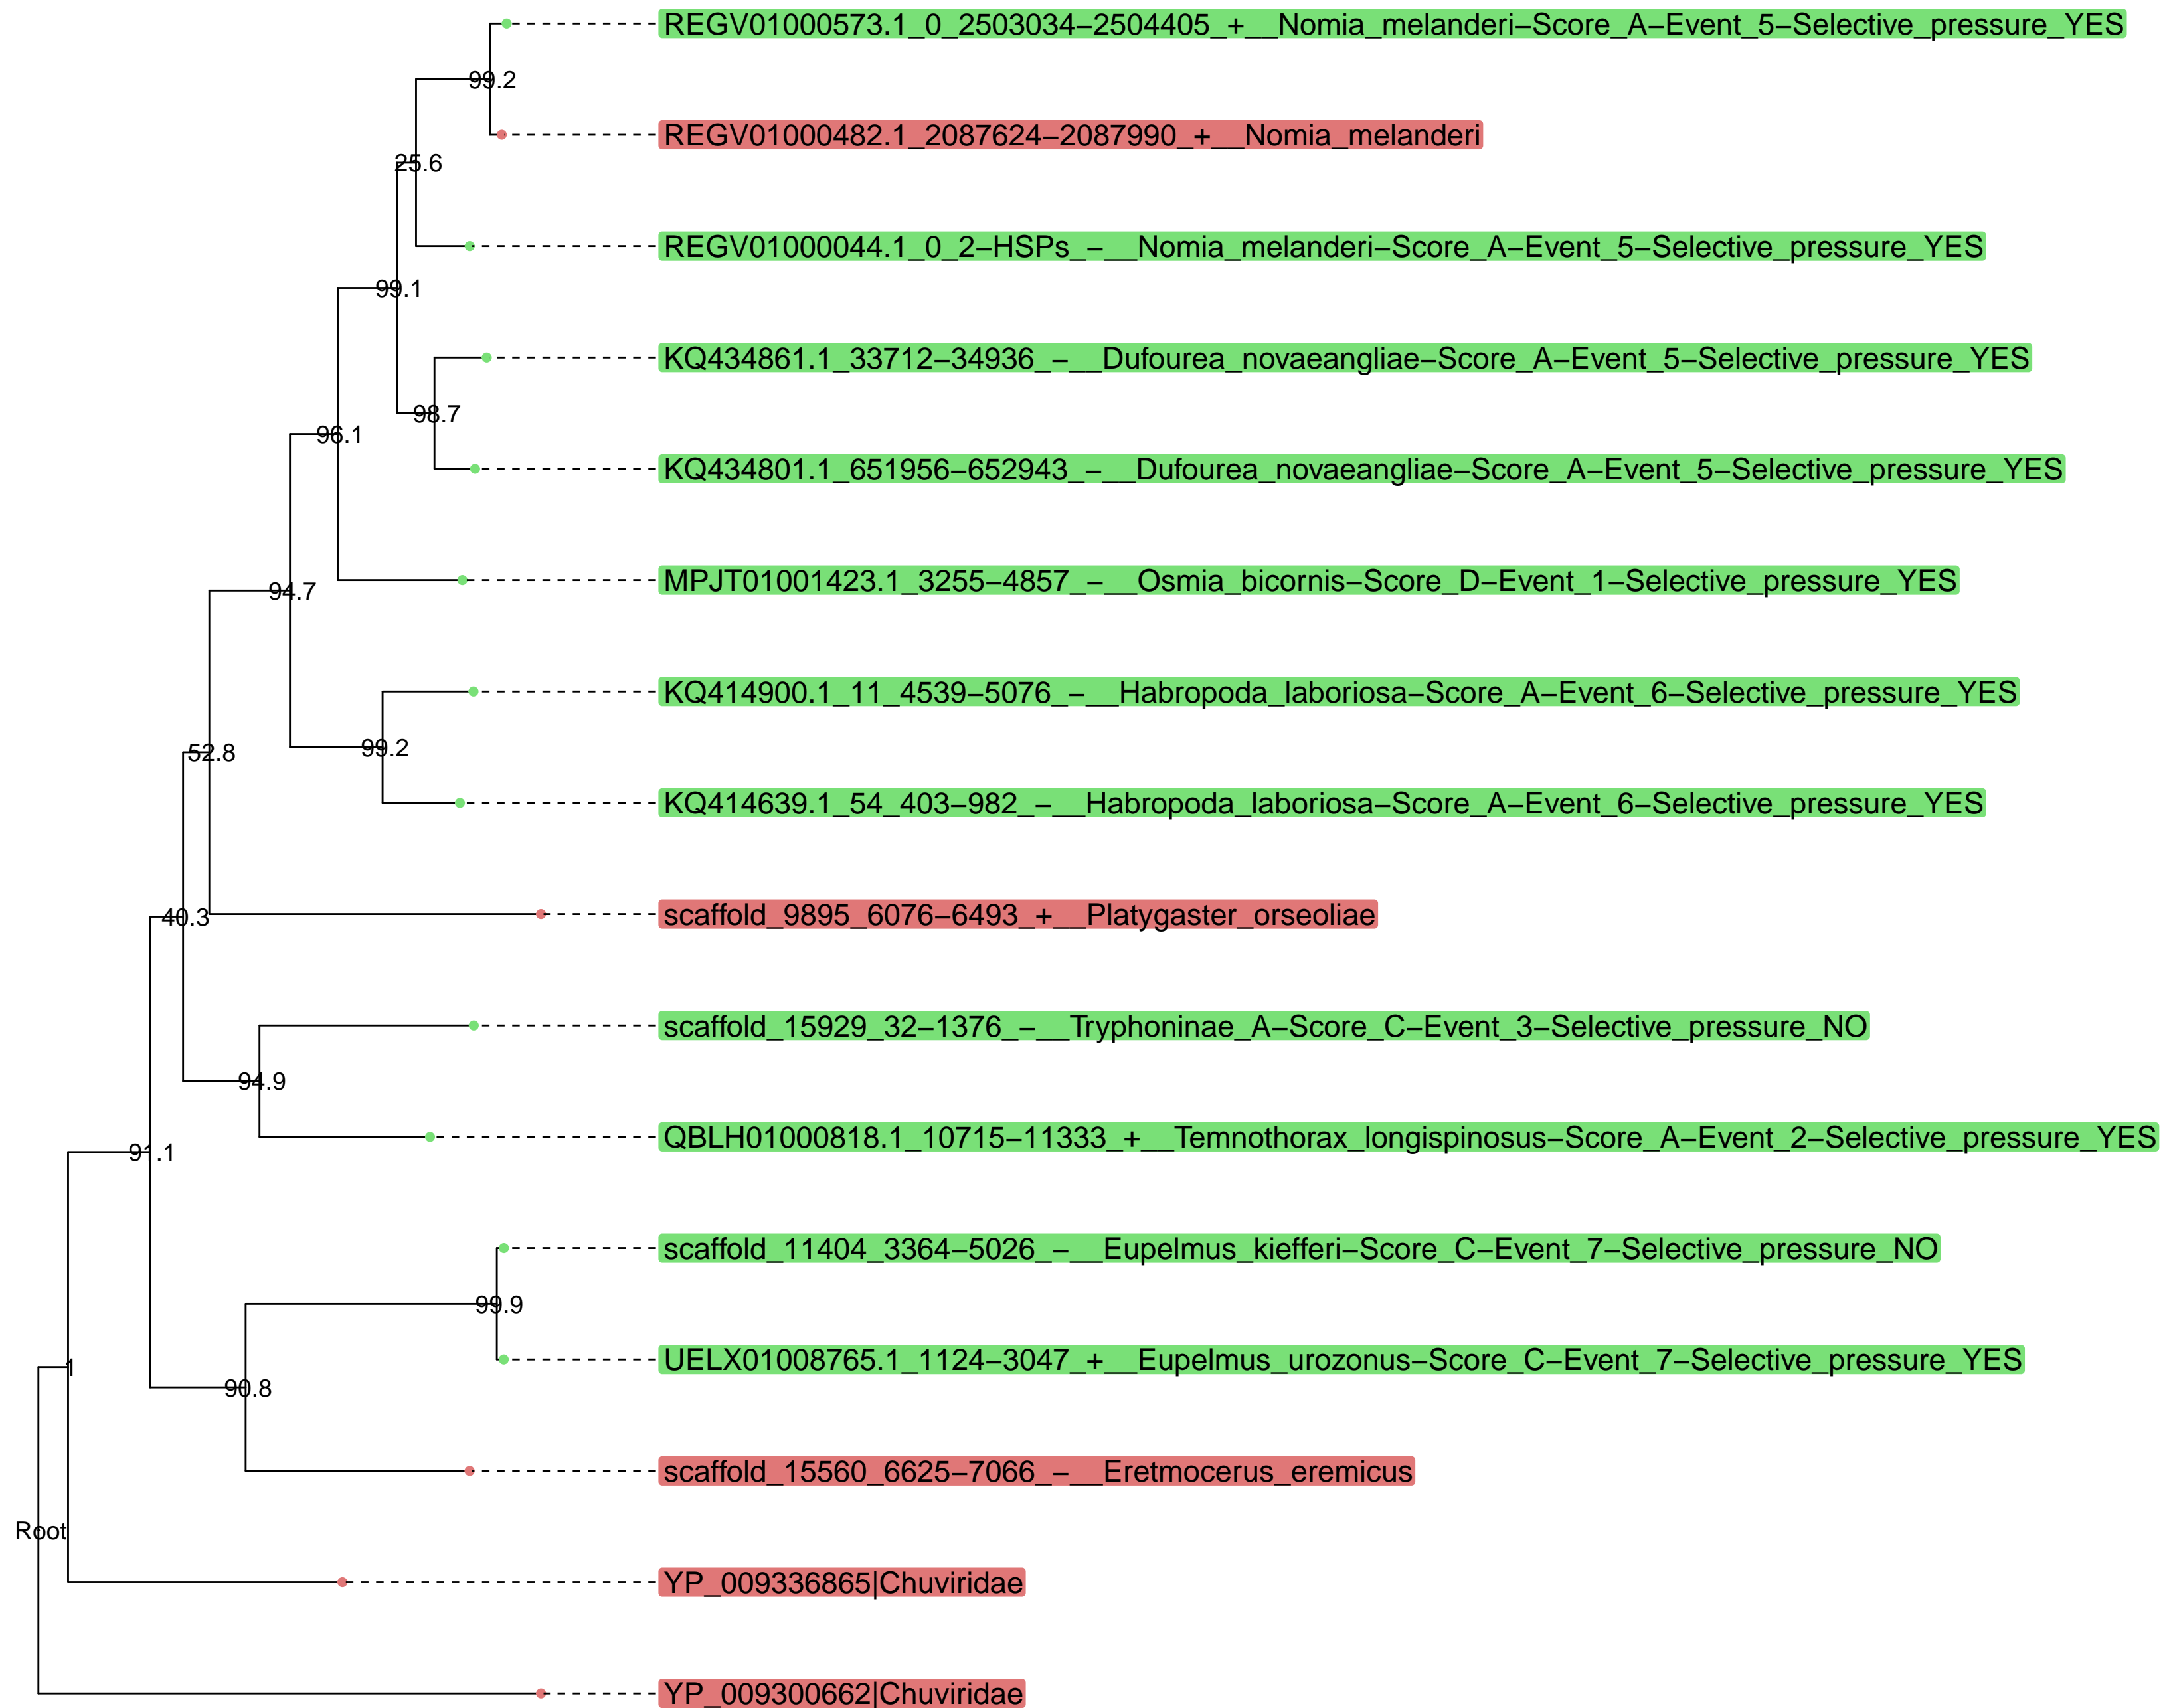

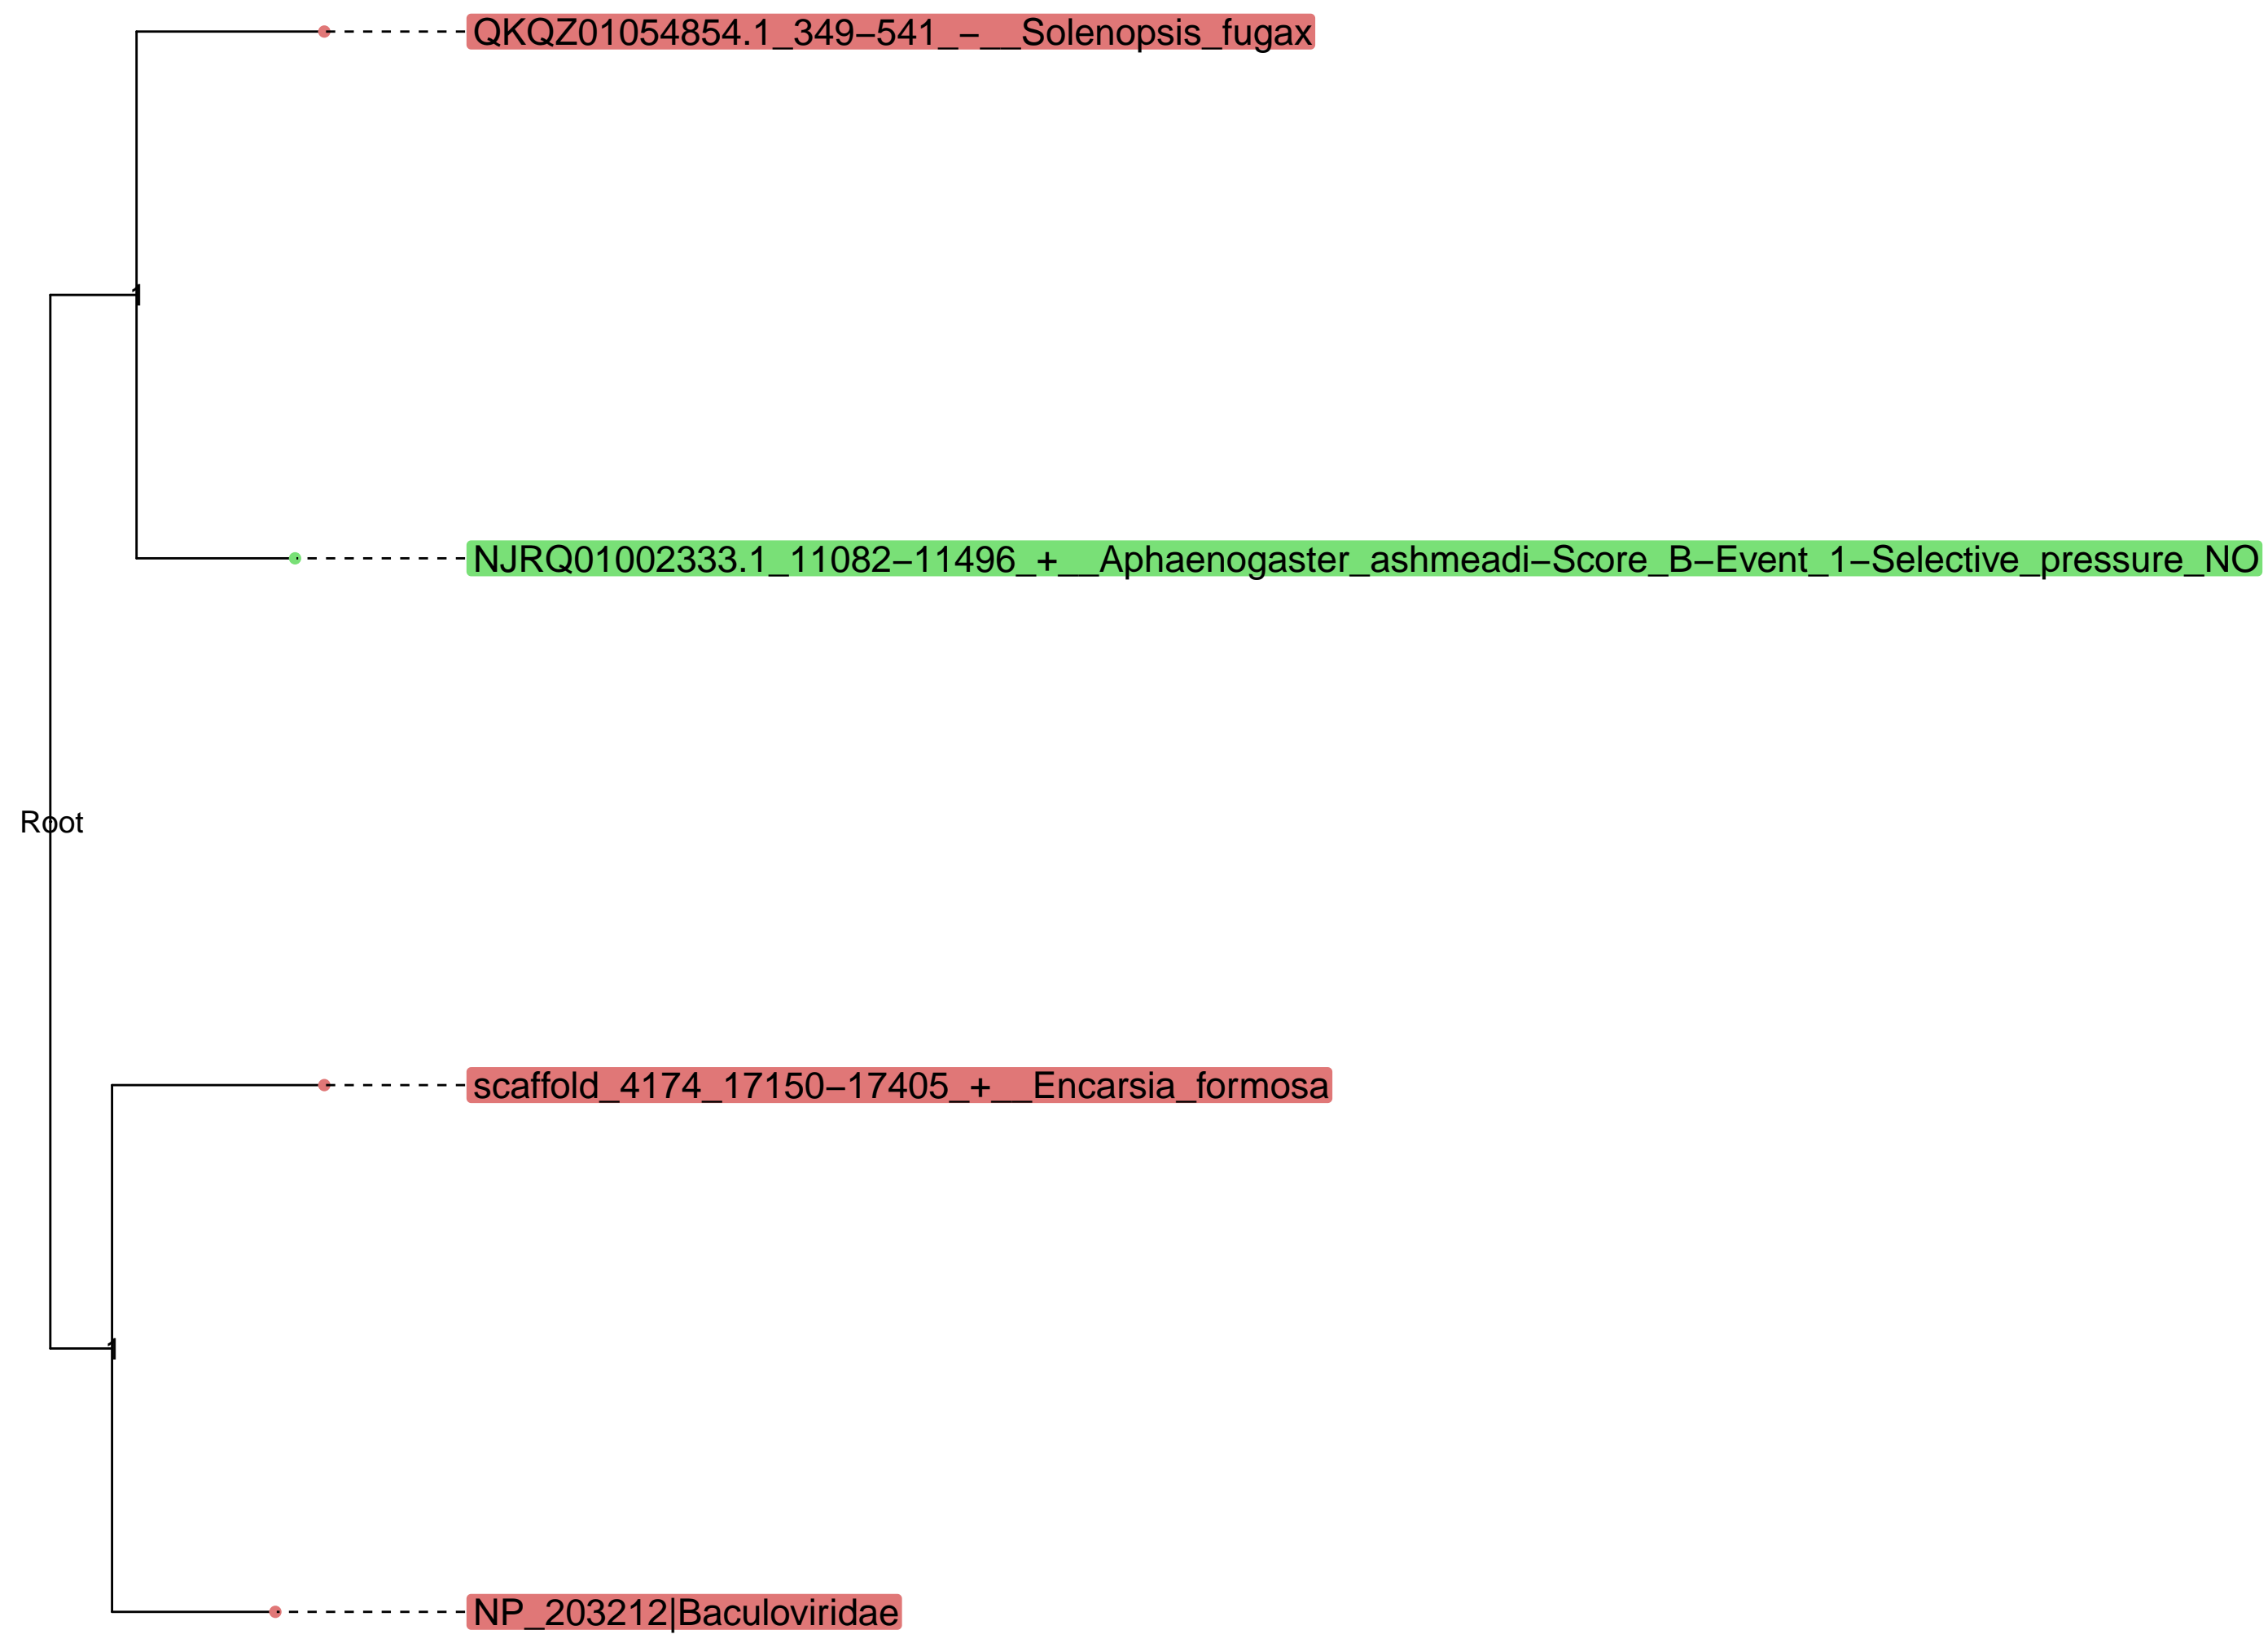

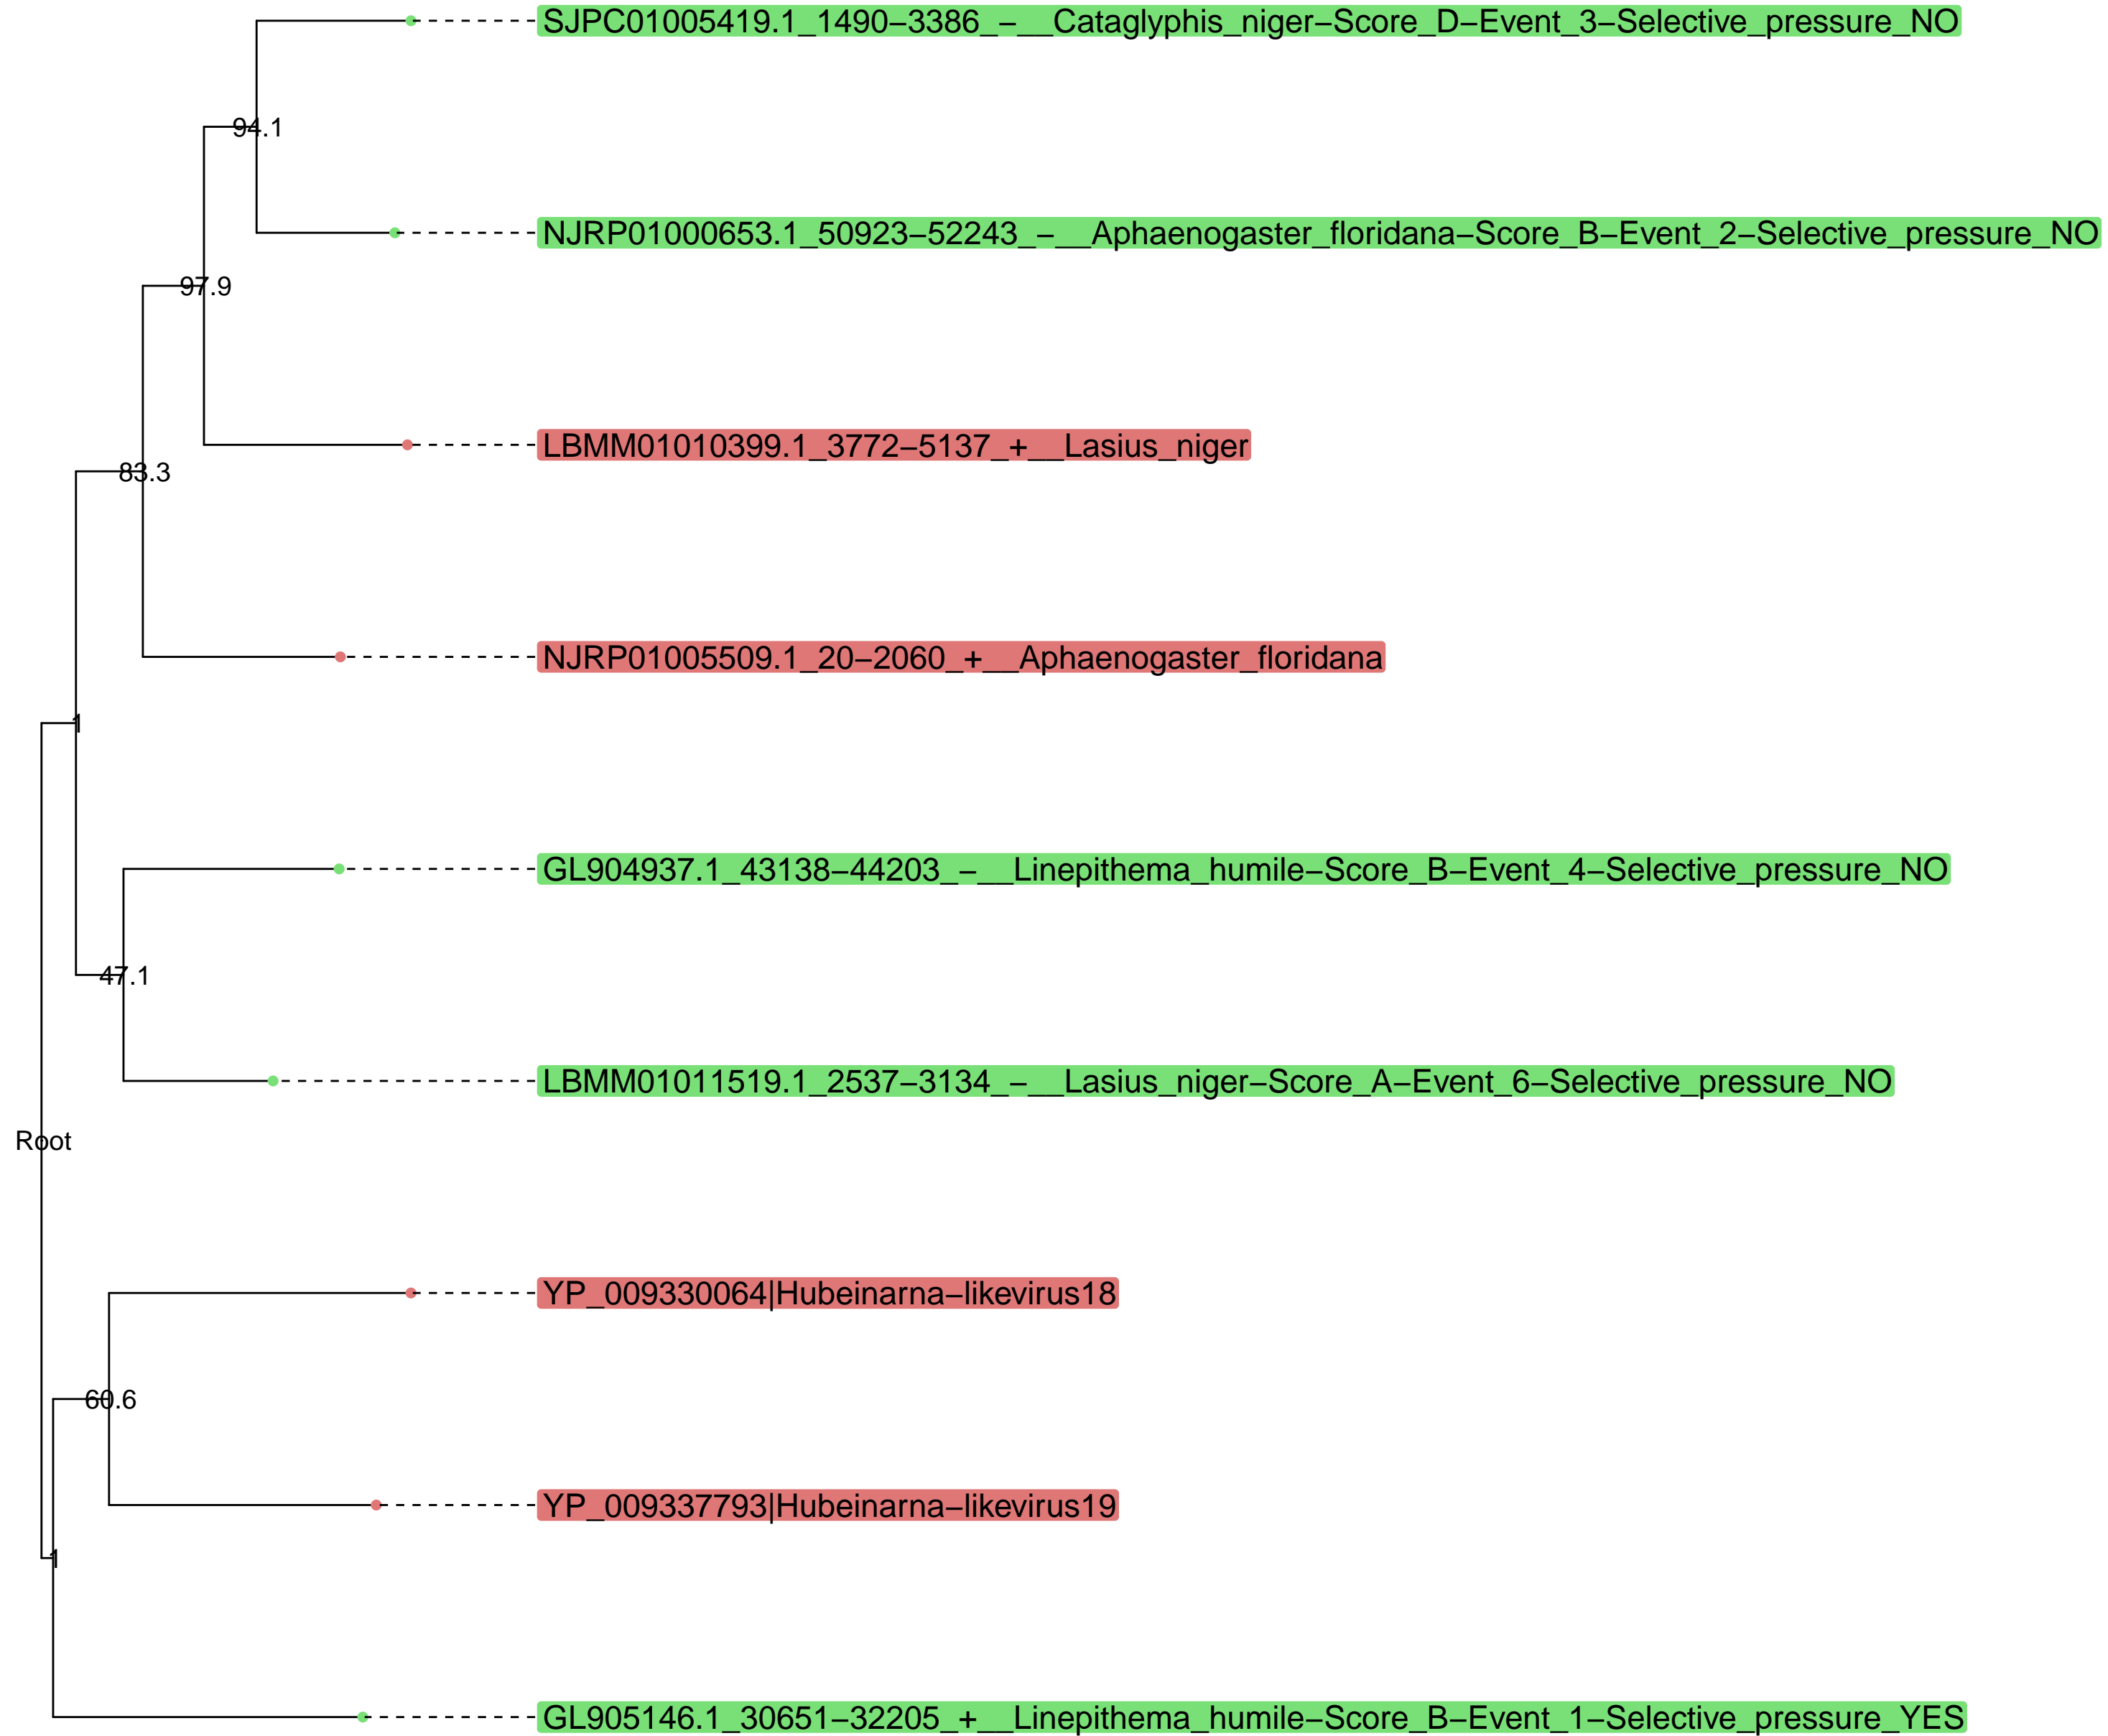

Cluster20094 – families involved : ['Narna-Levi'] – putative protein : ['RNA-dependent RNA polymerase']

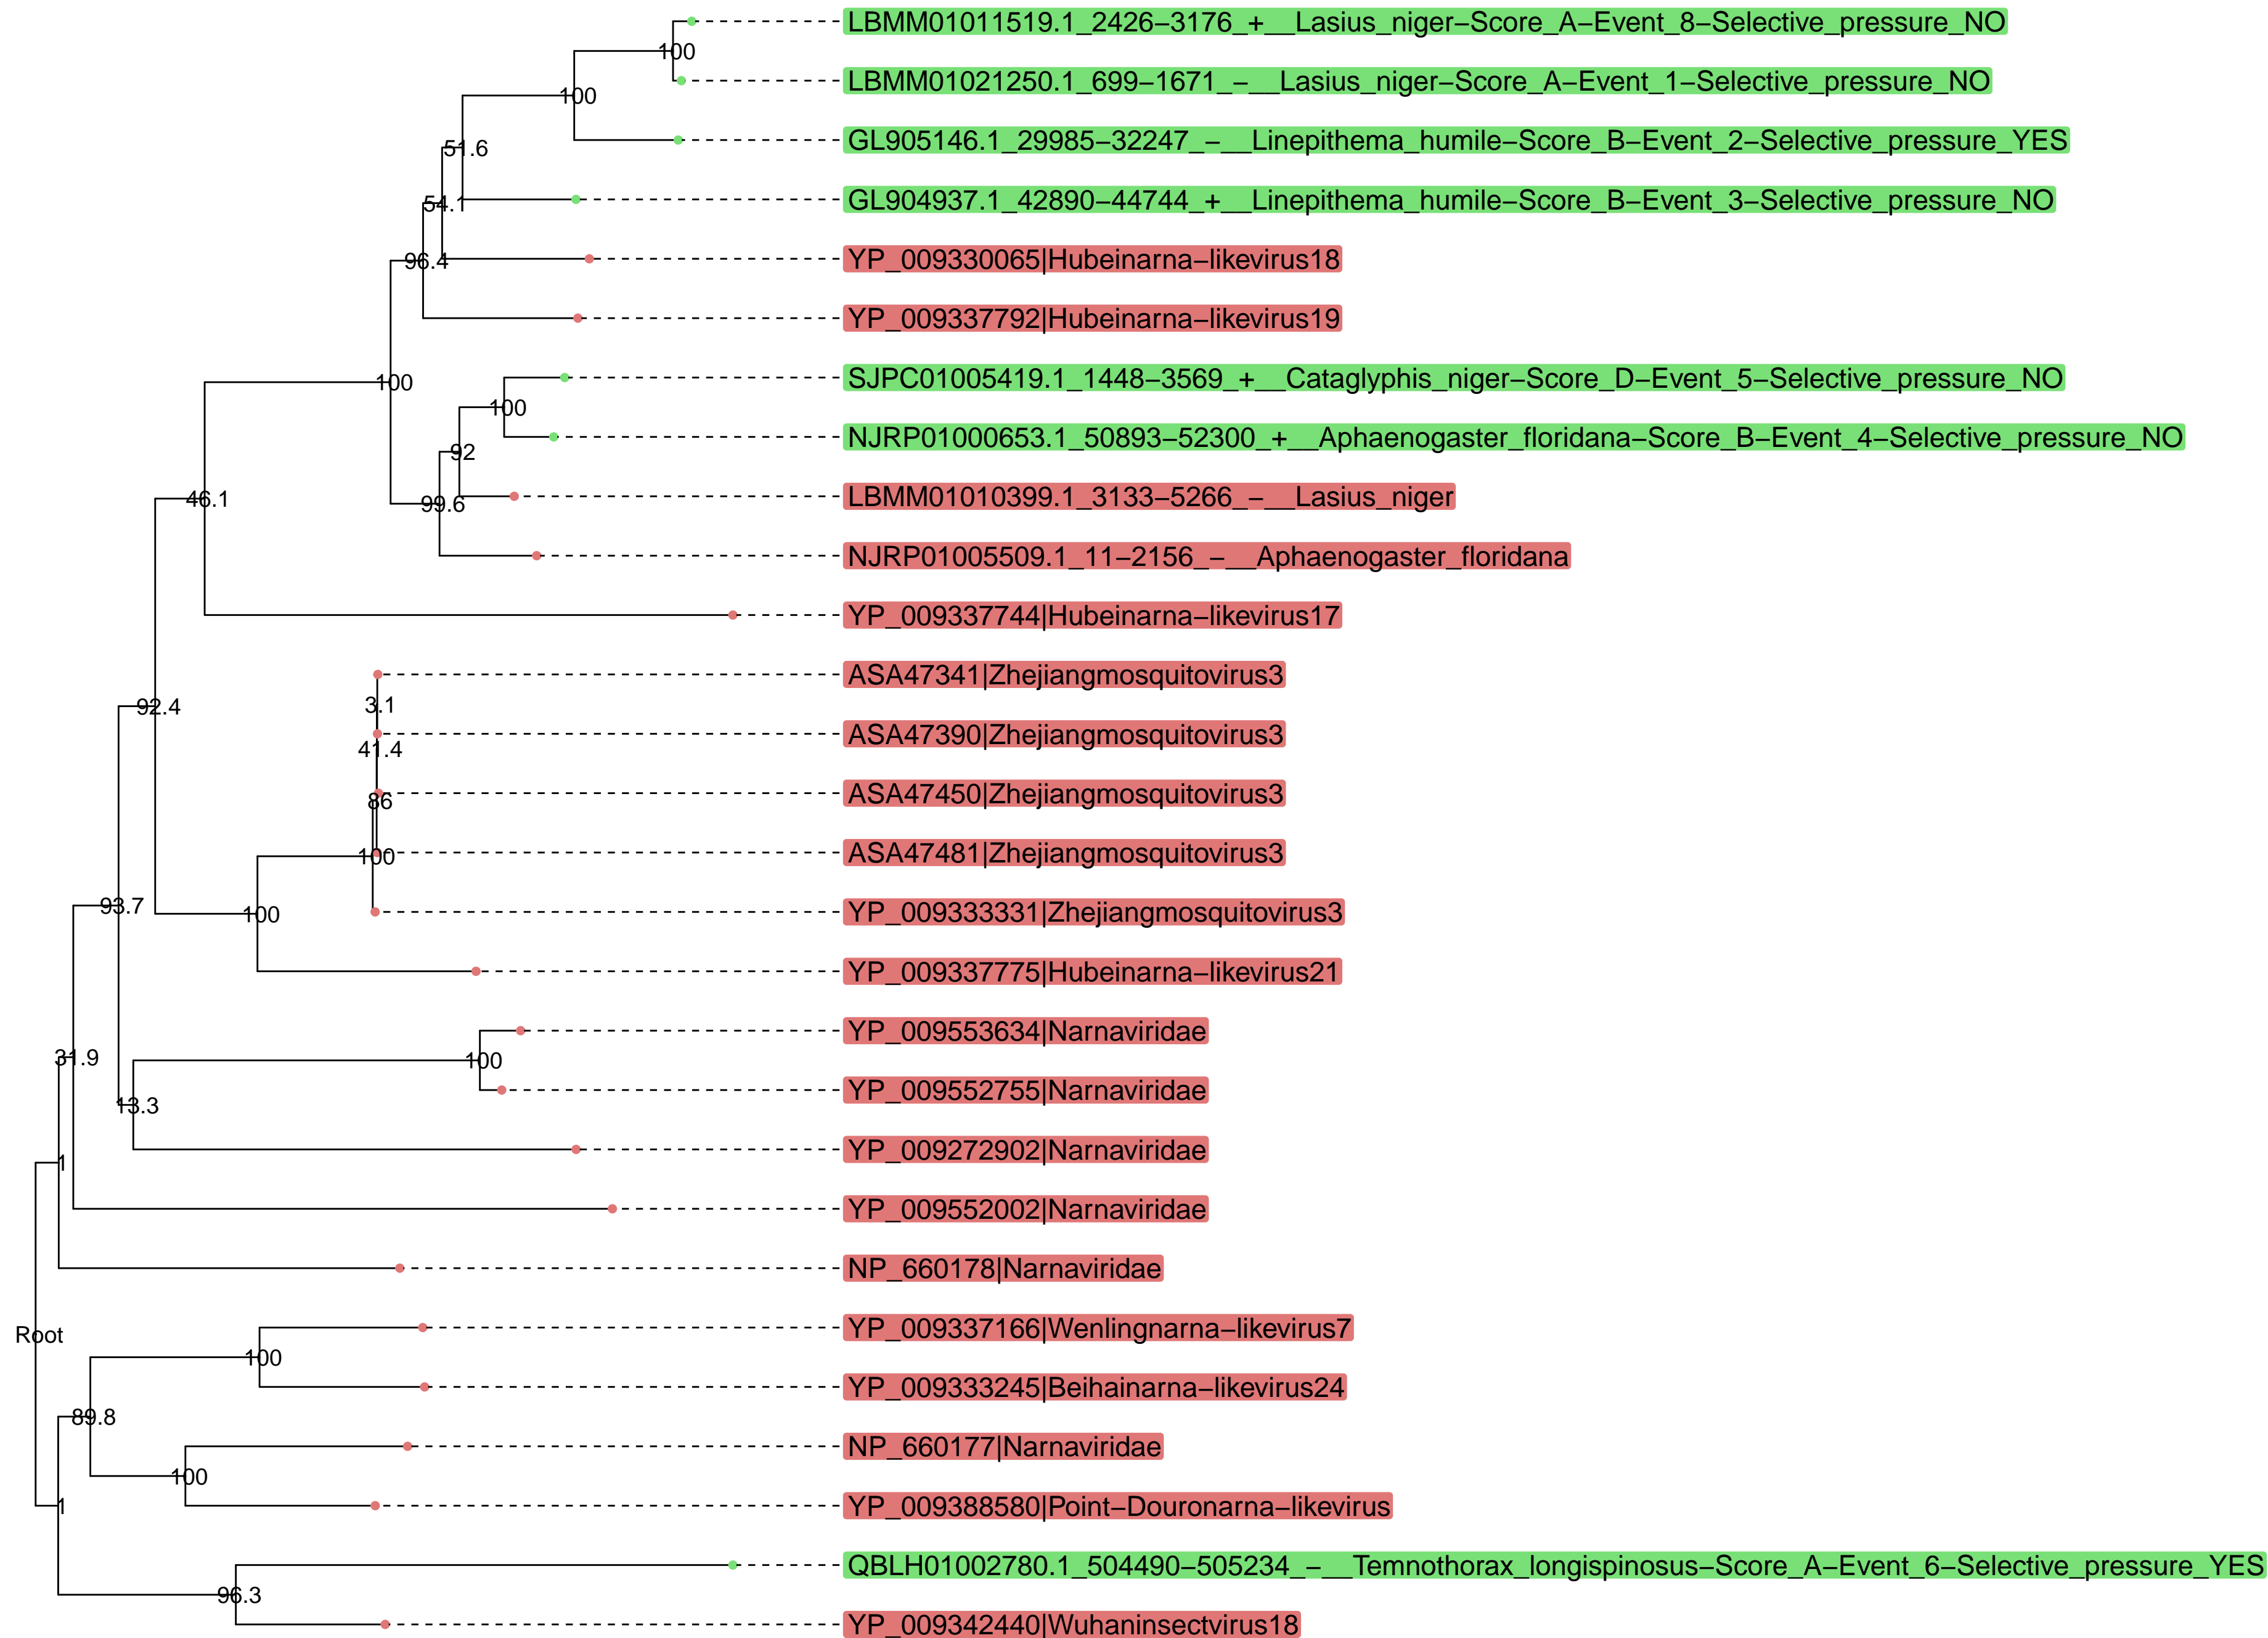

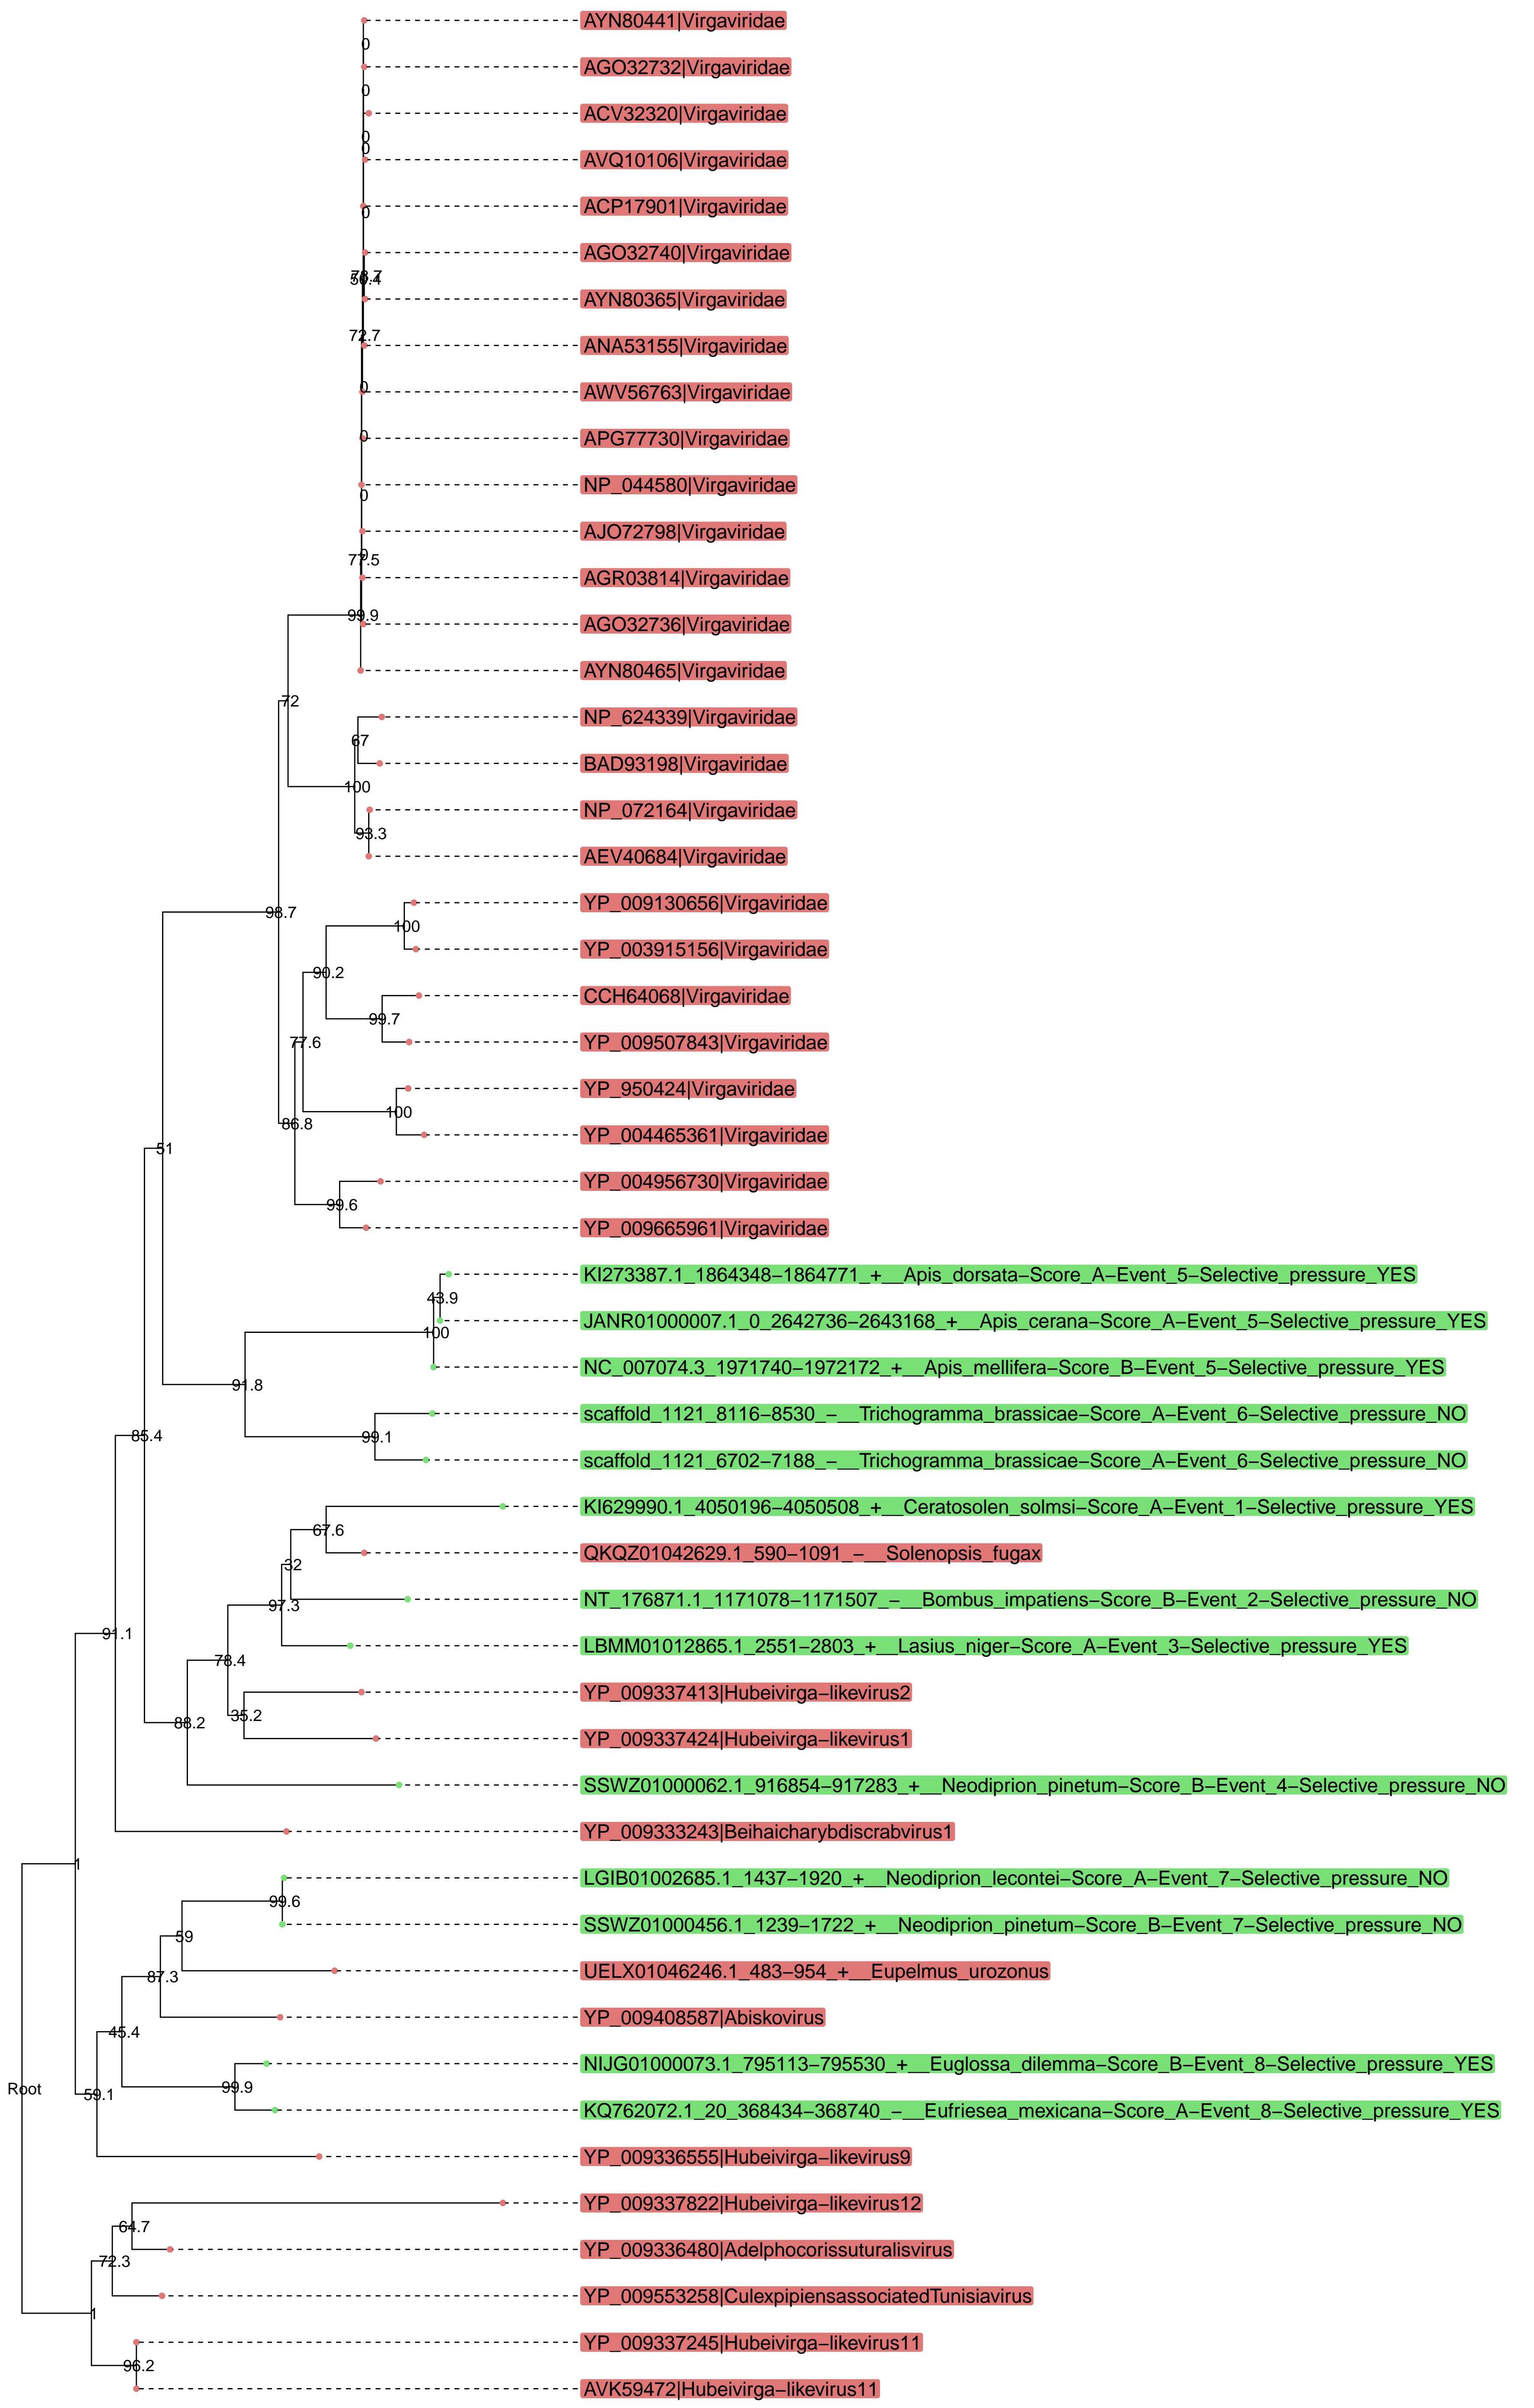

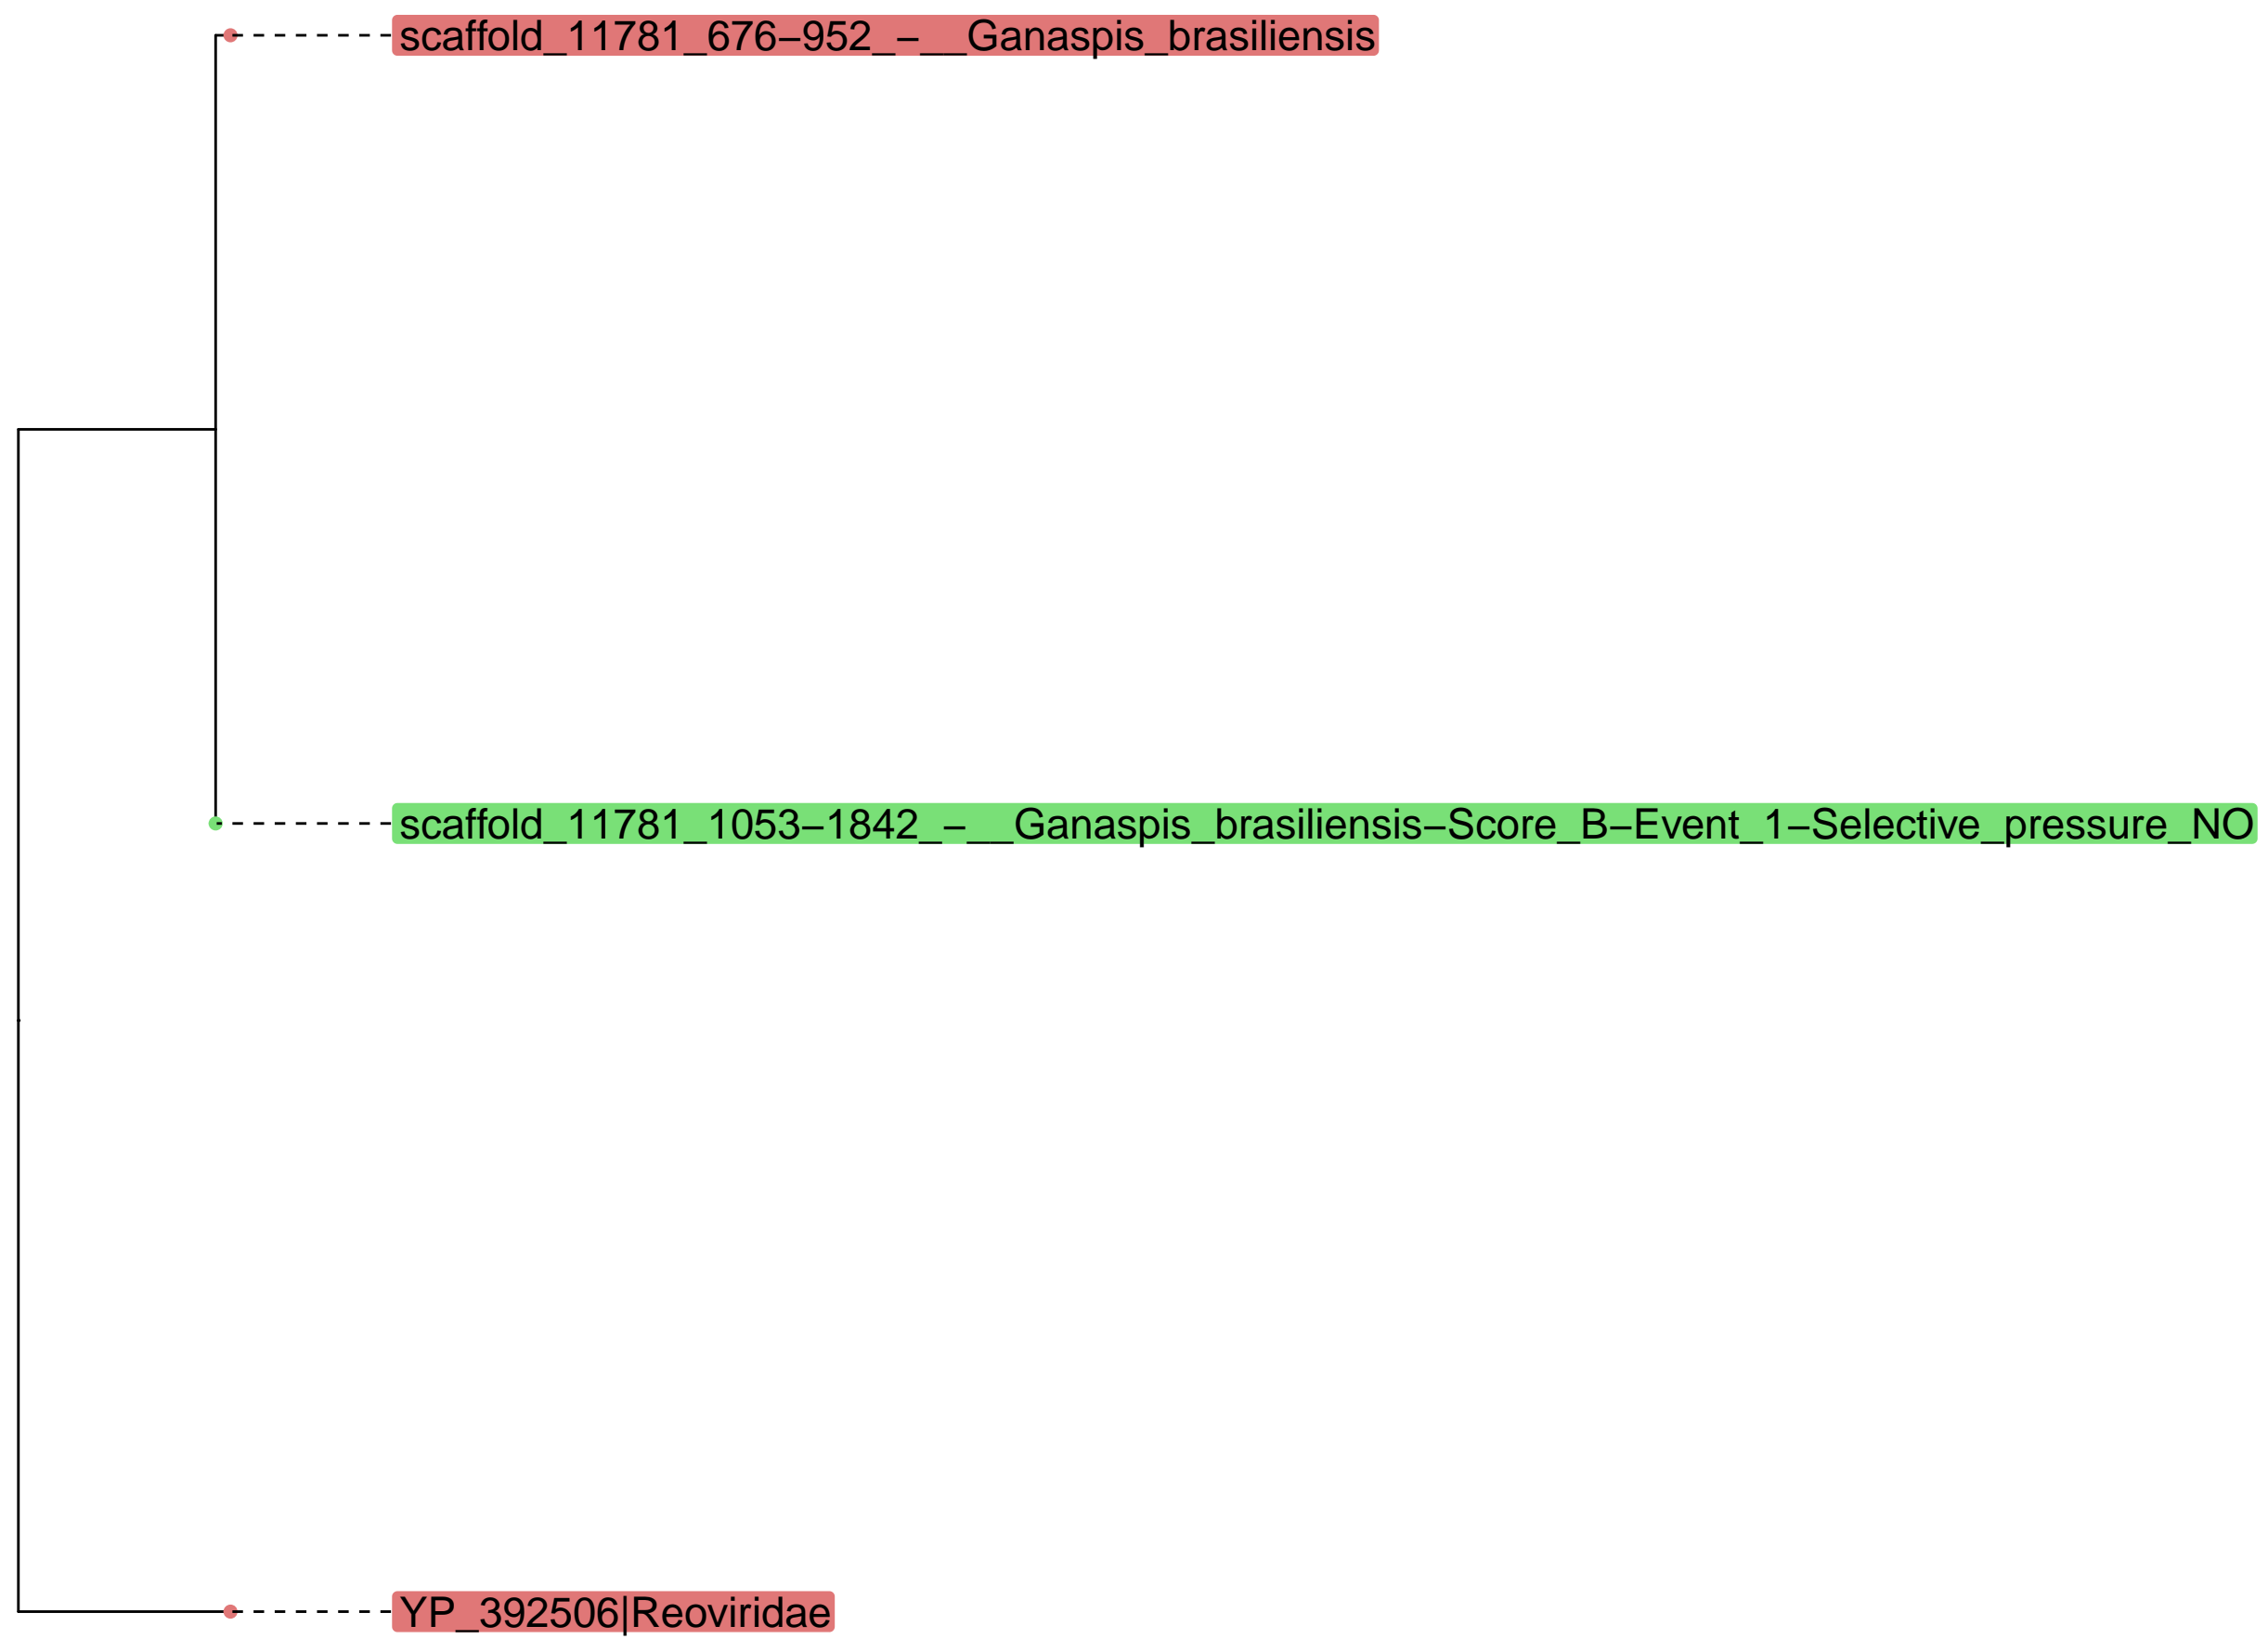

Cluster19345 – families involved : ['Nudiviridae'] – putative protein : ['p51 late protein']

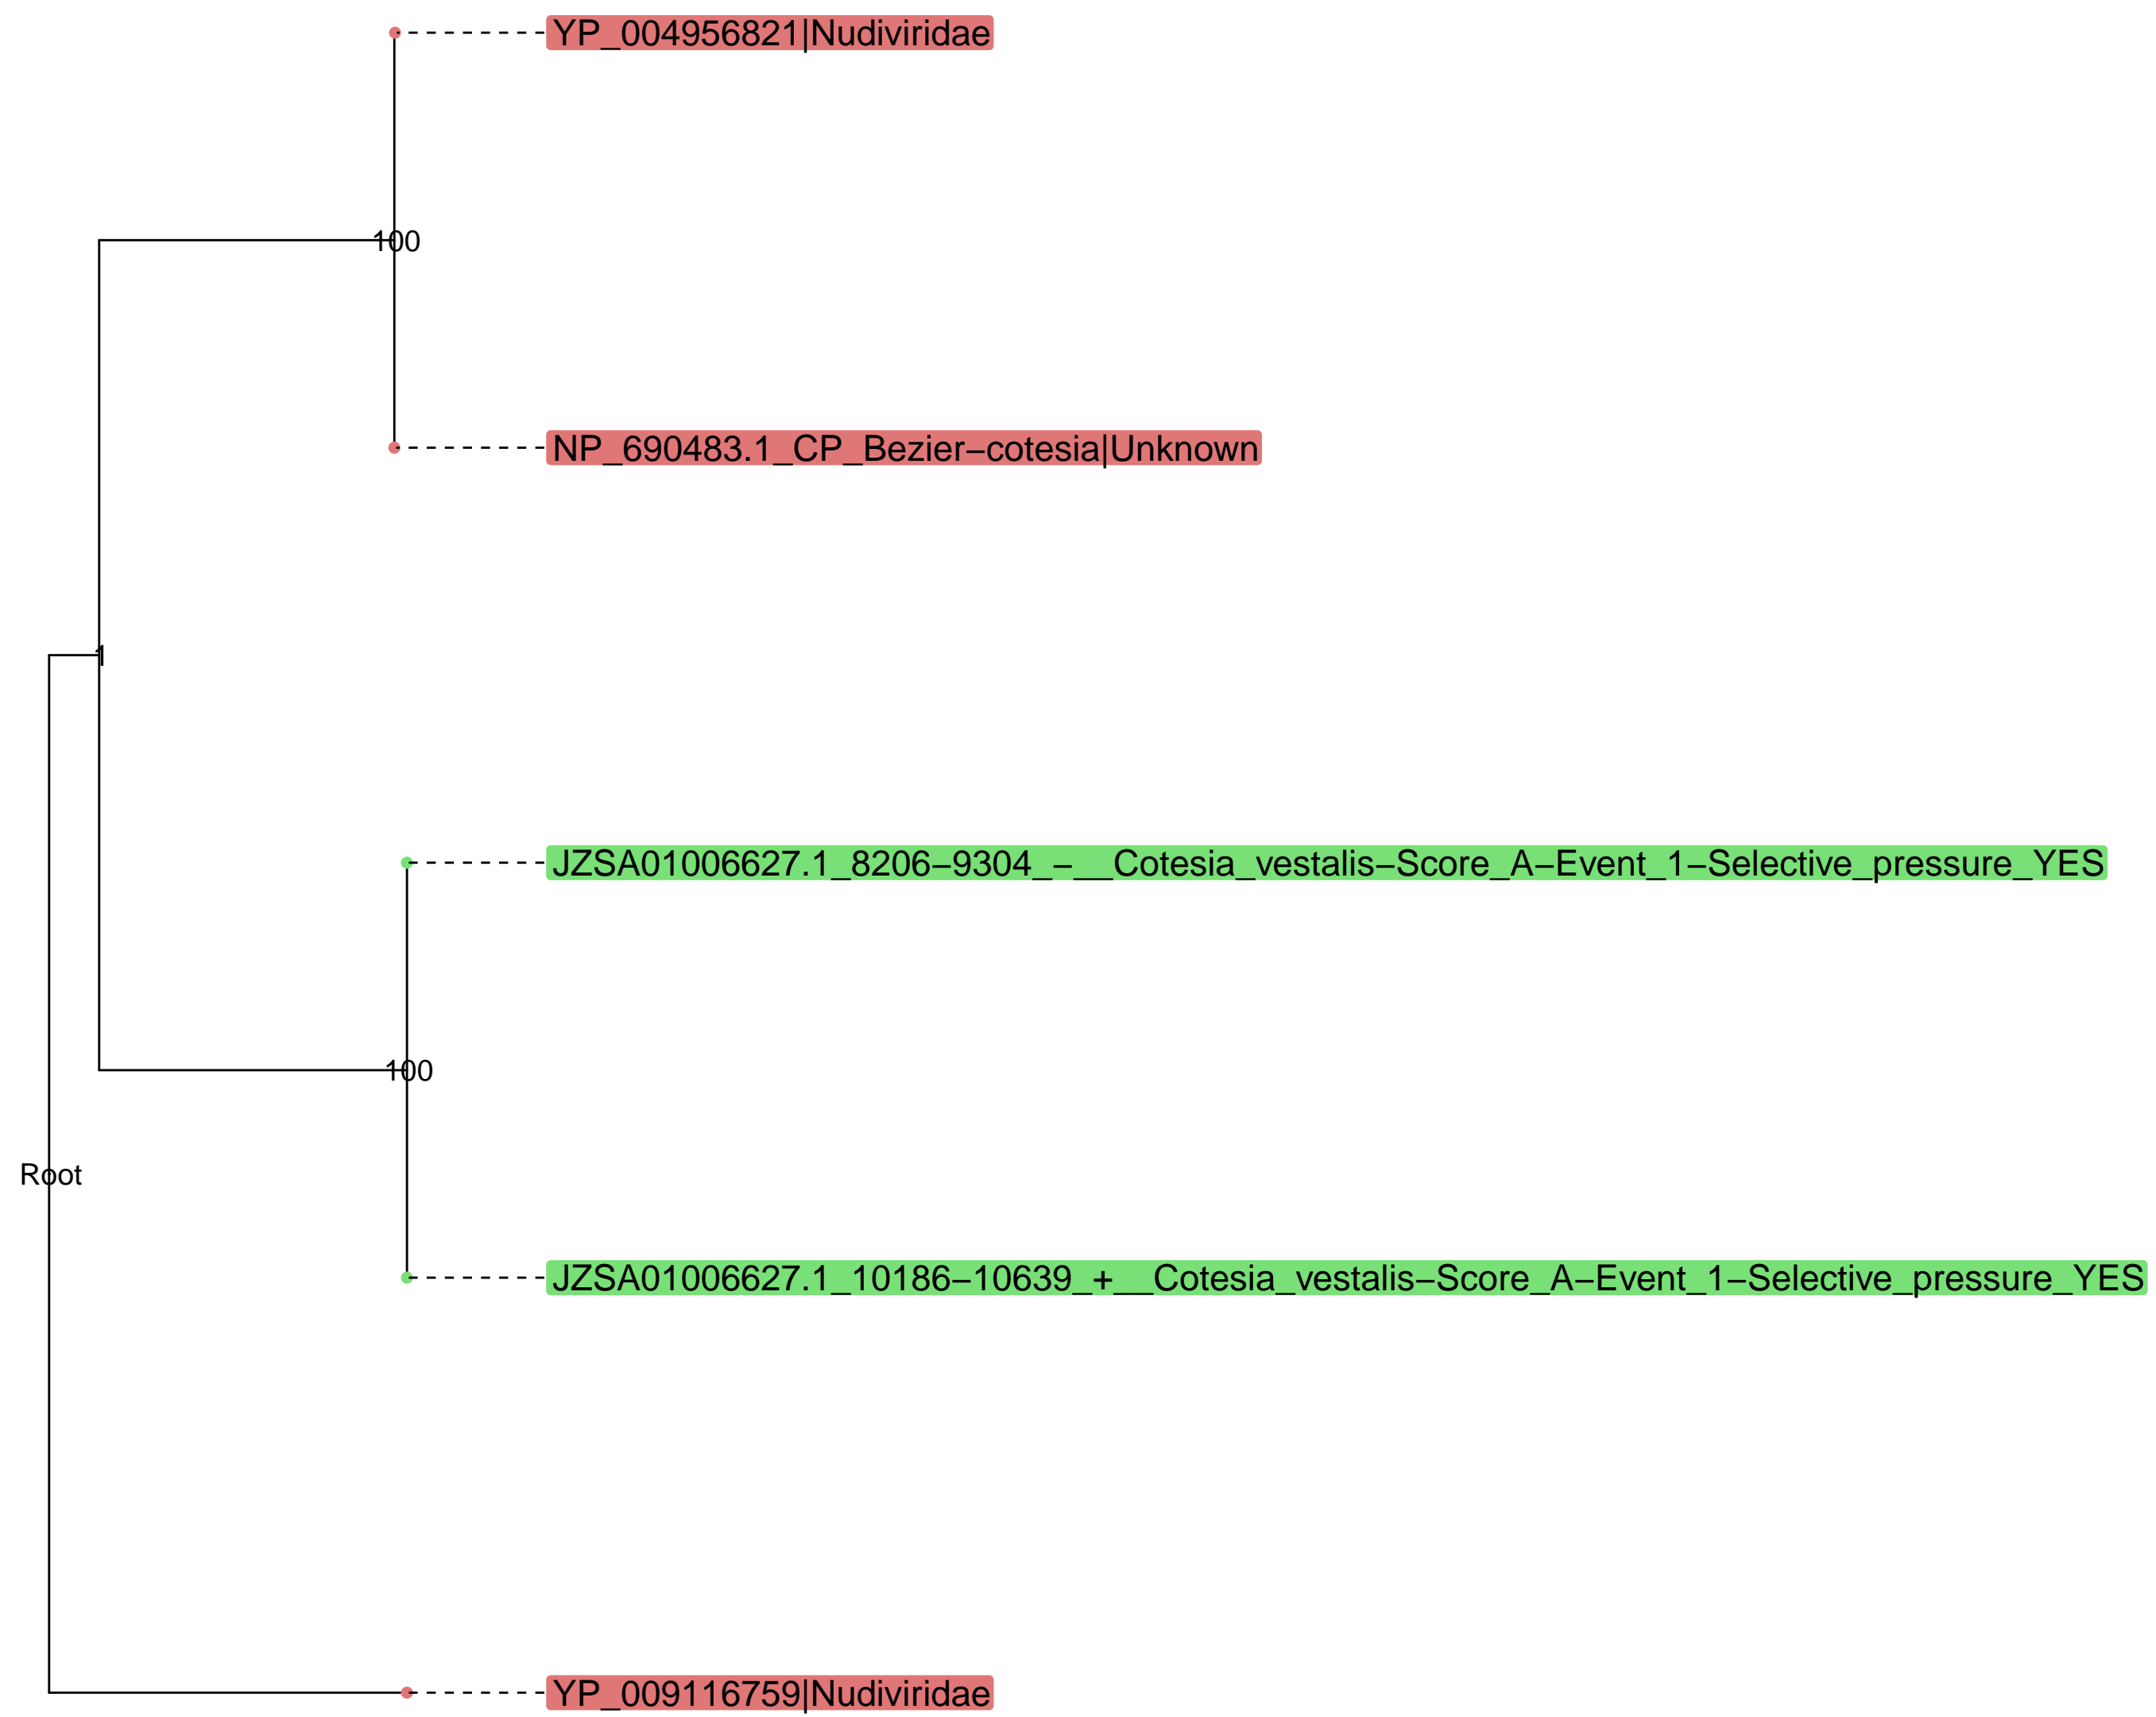

Cluster19040 – families involved : ['Baculoviridae'] – putative protein : ['p35']

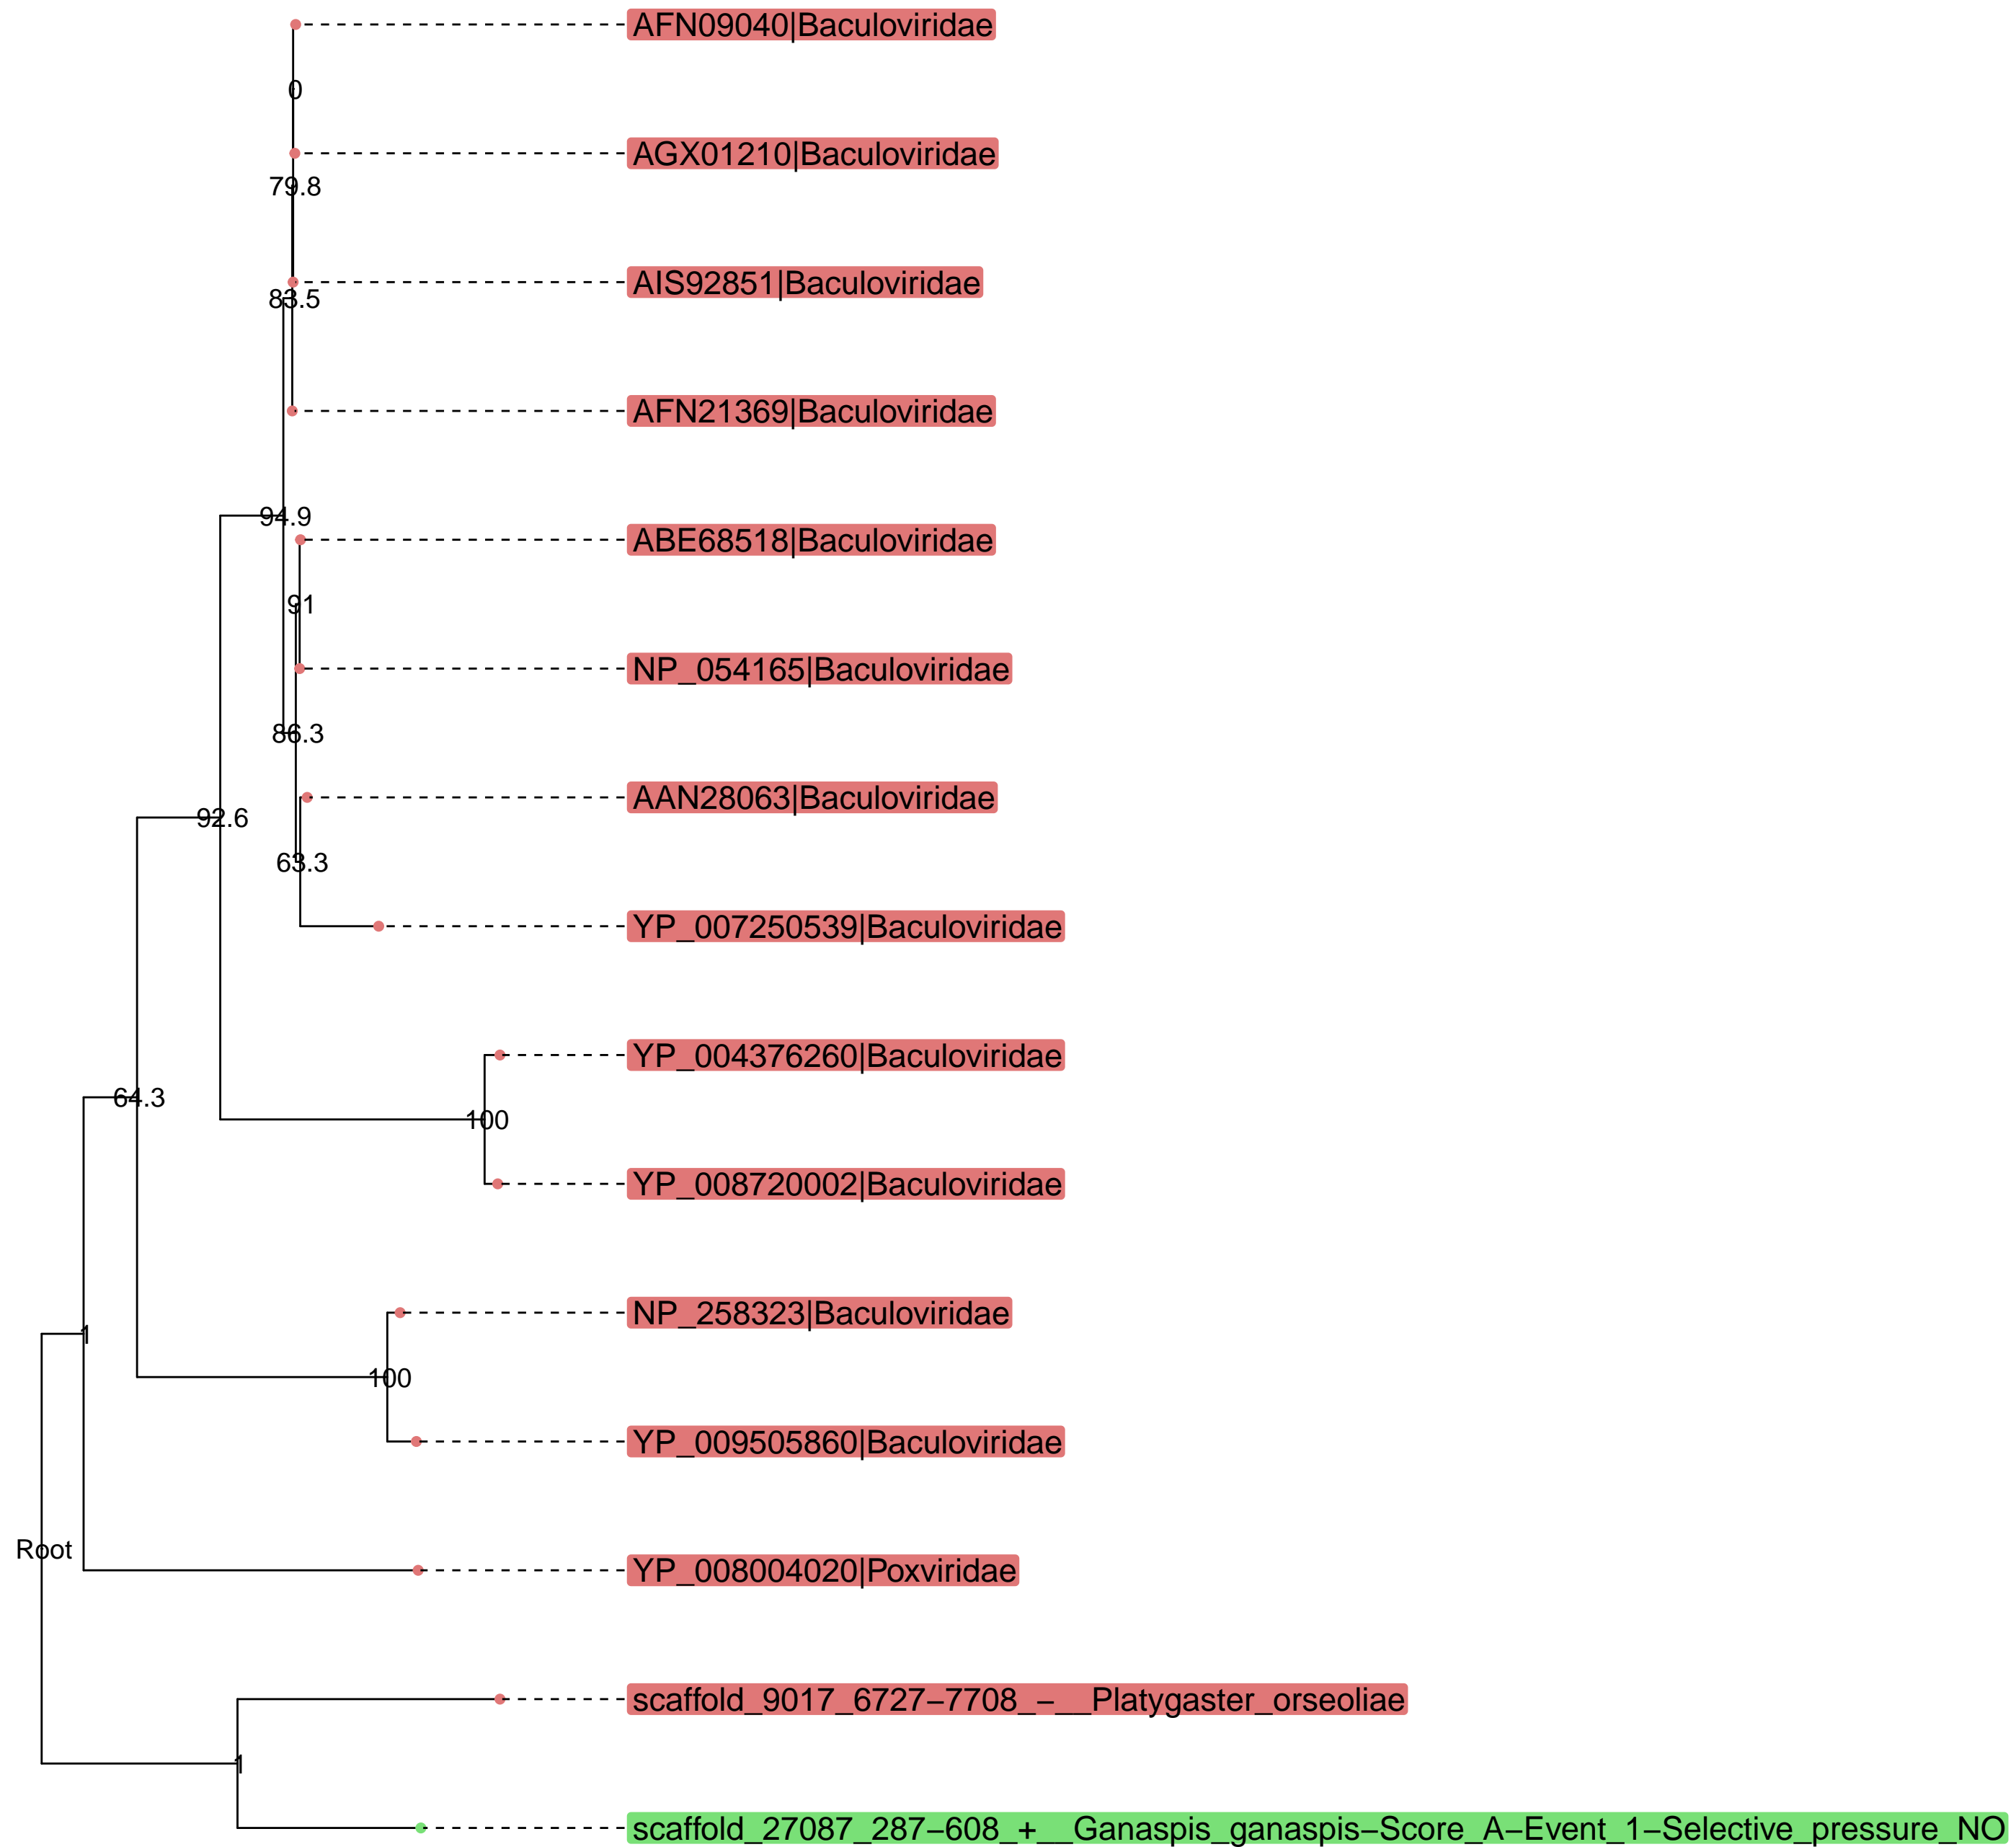



Cluster25342 – families involved : ['Reoviridae'] – putative protein : ['RNA binding protein']

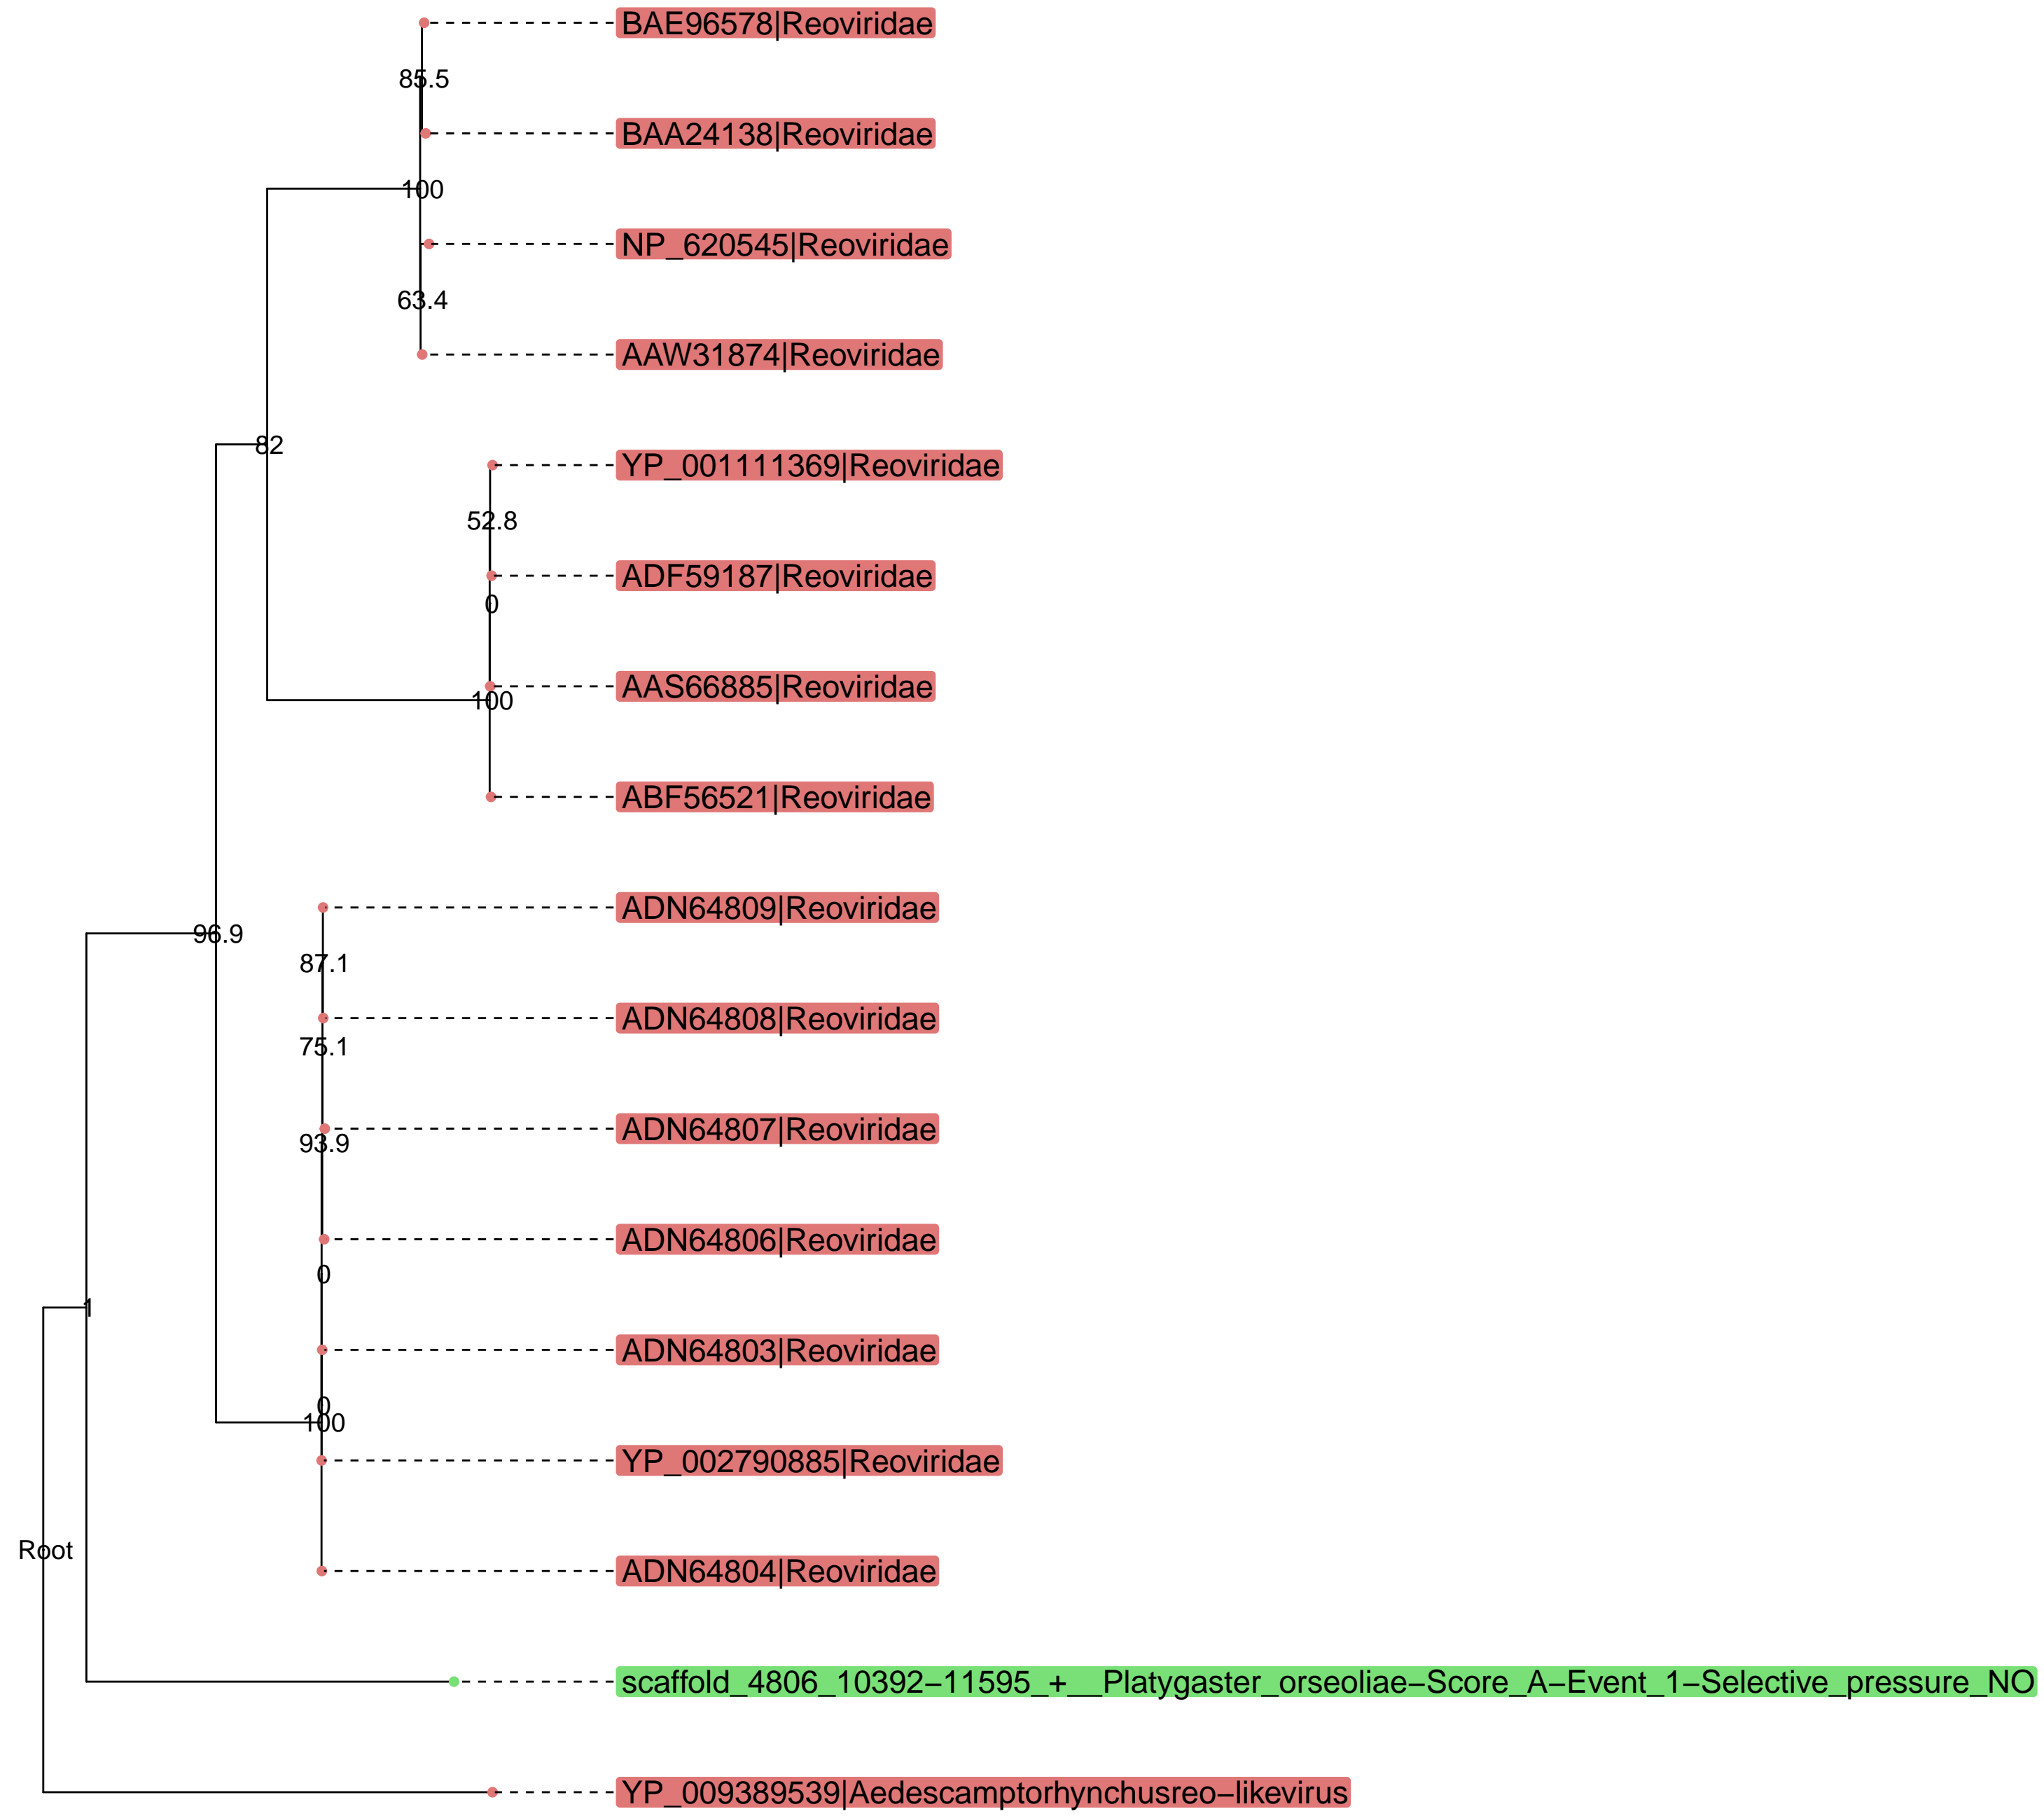

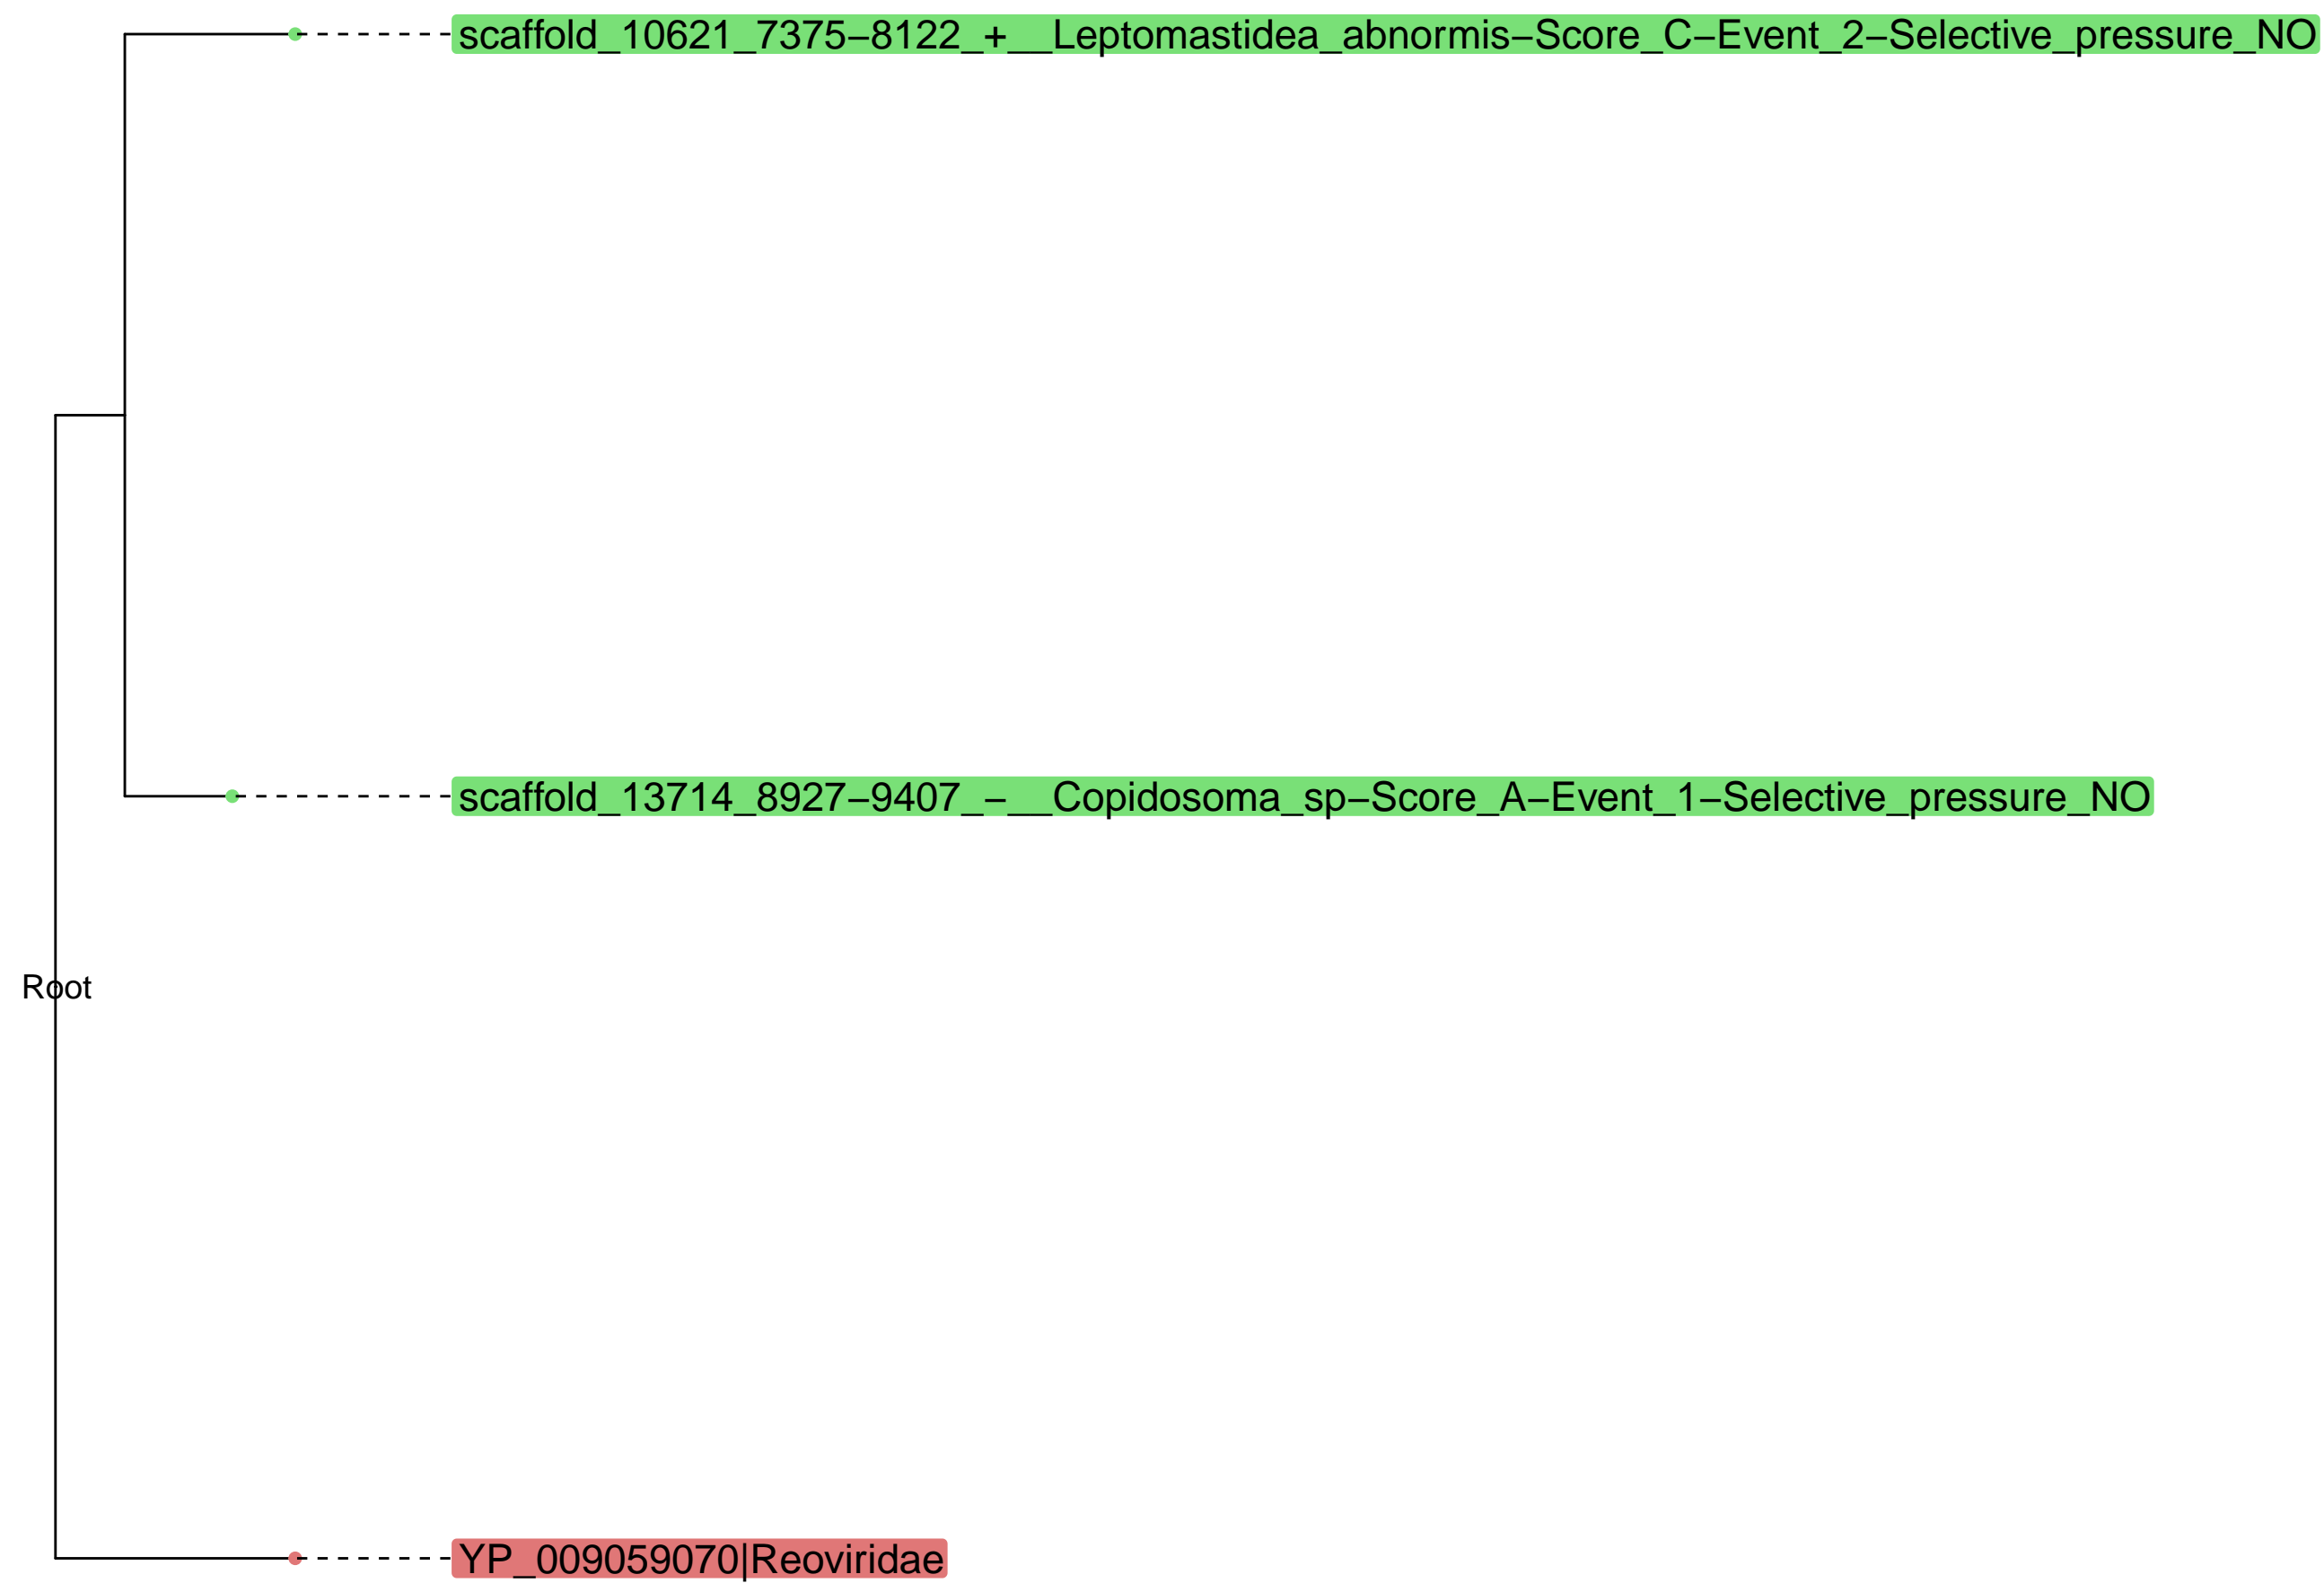

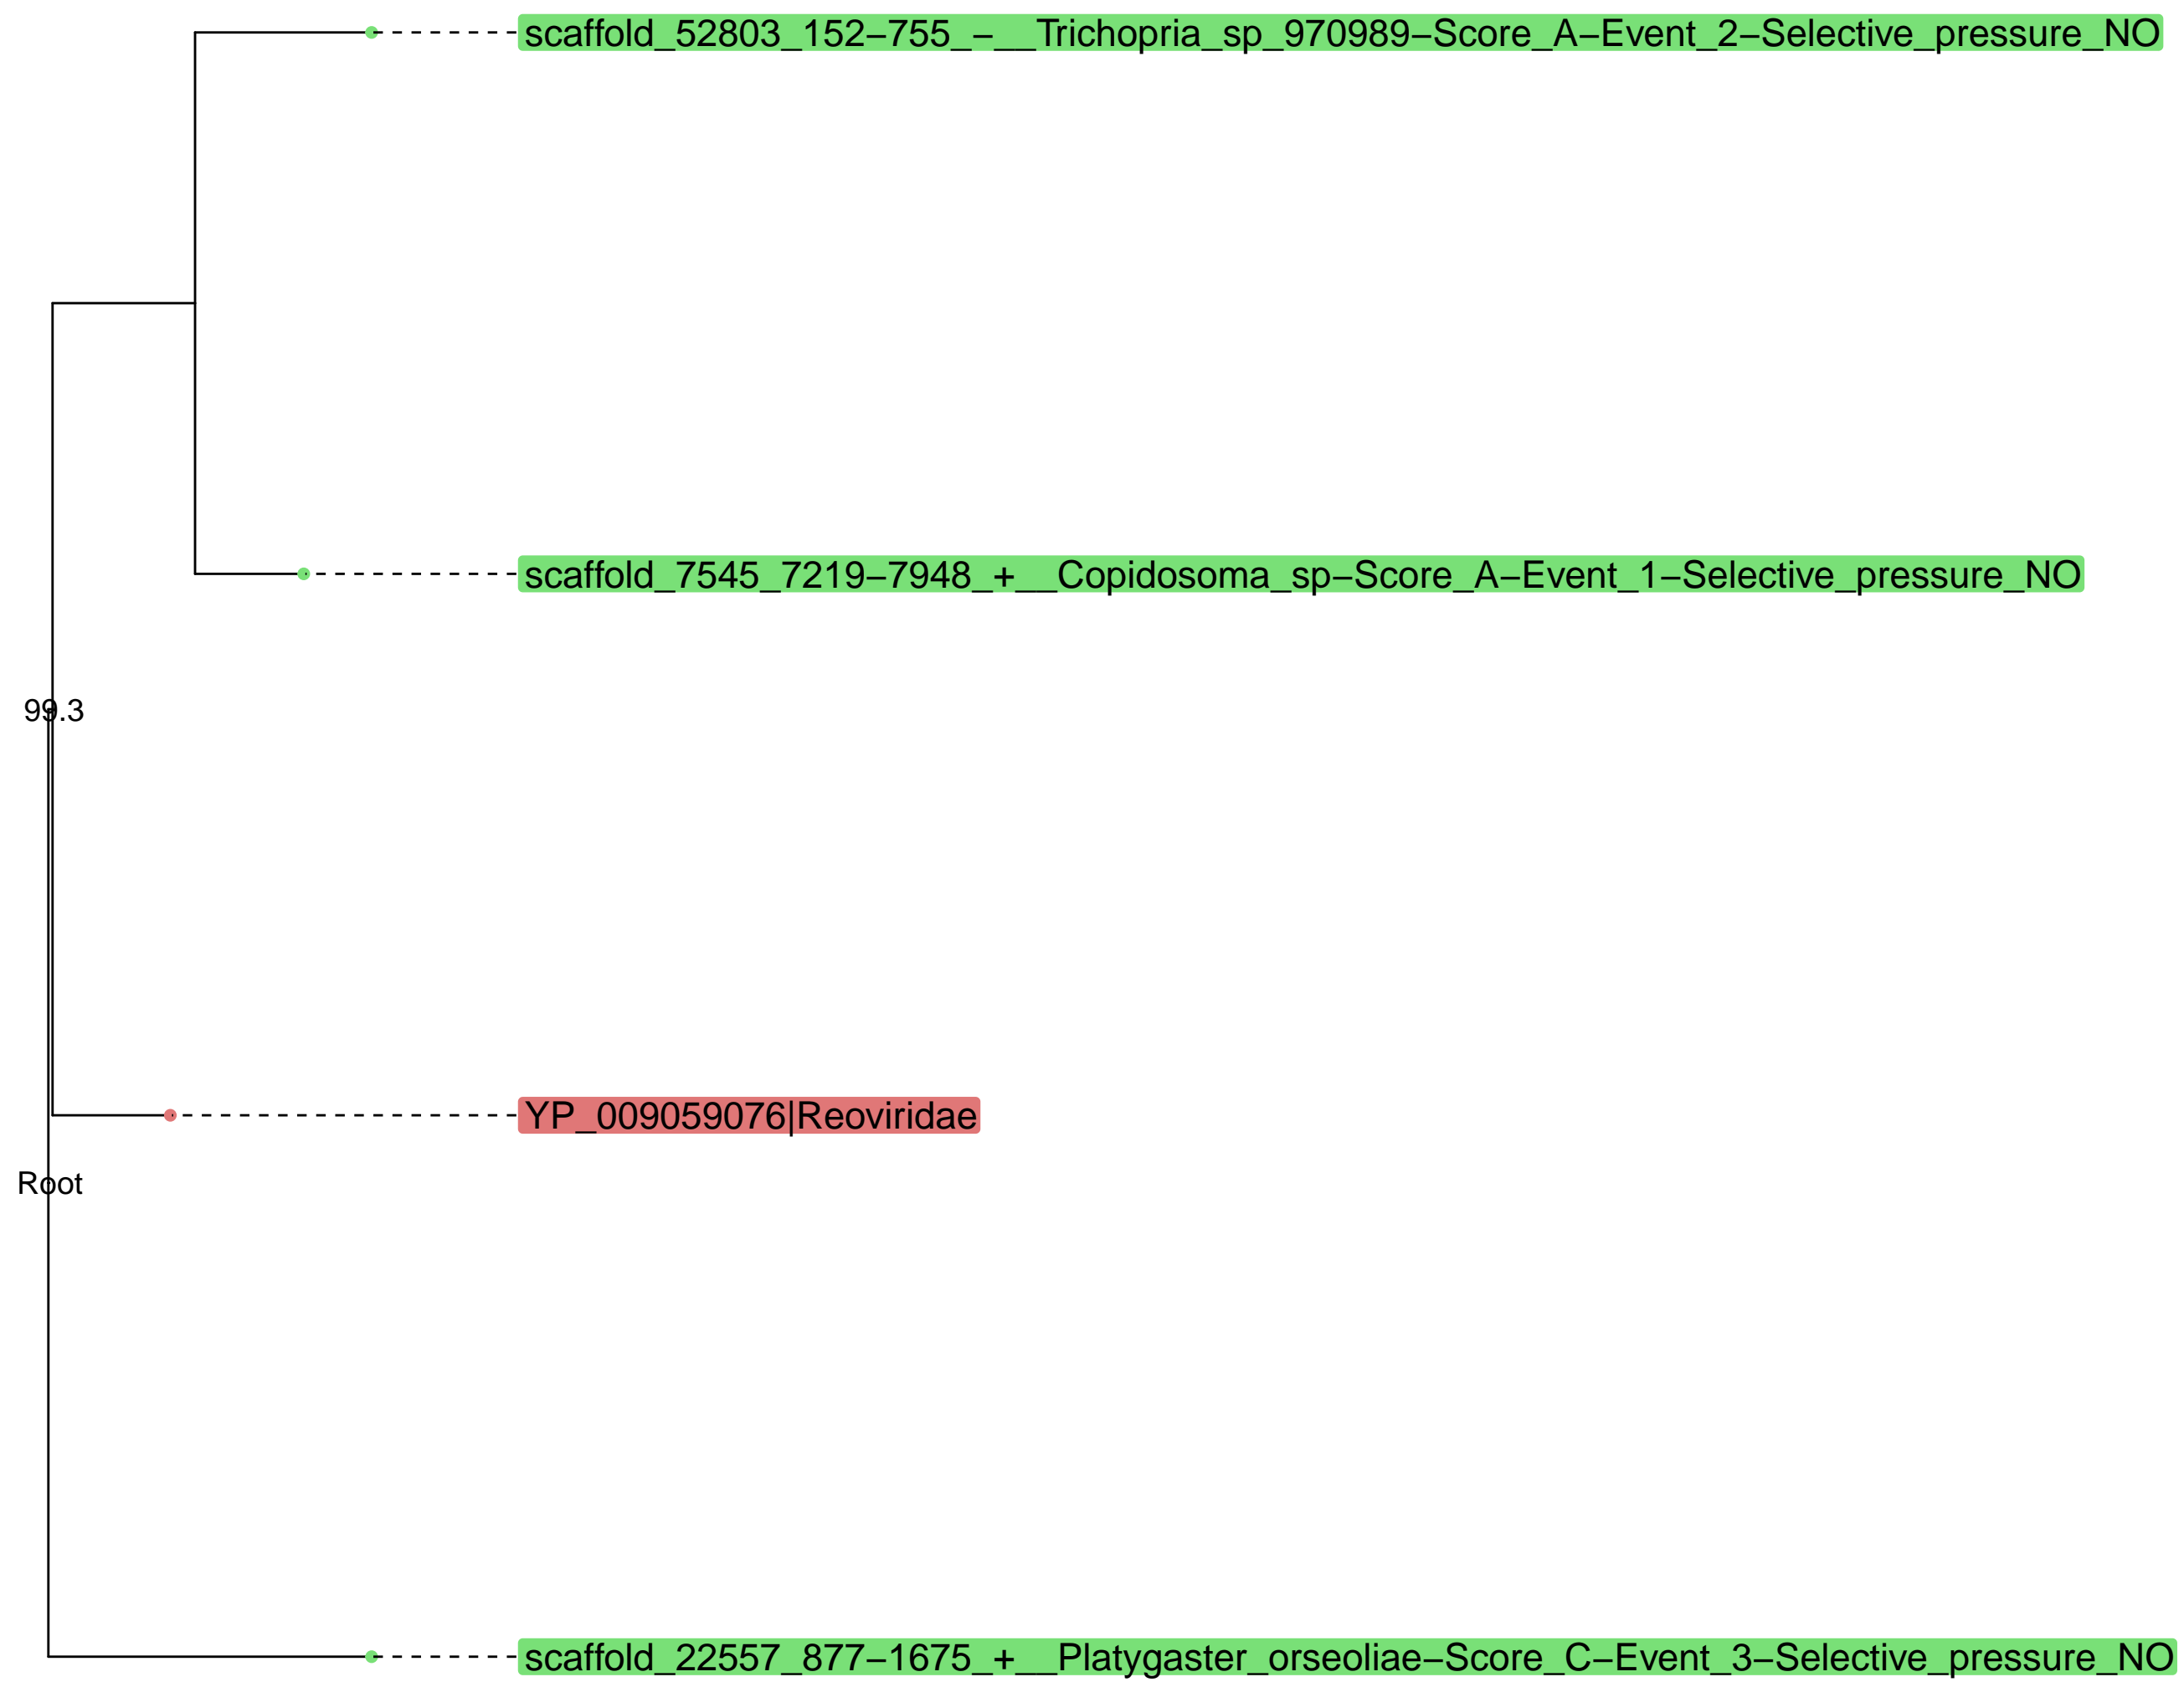

Cluster1870 – families involved : ['Reoviridae'] – putative protein : ['Major core protein']

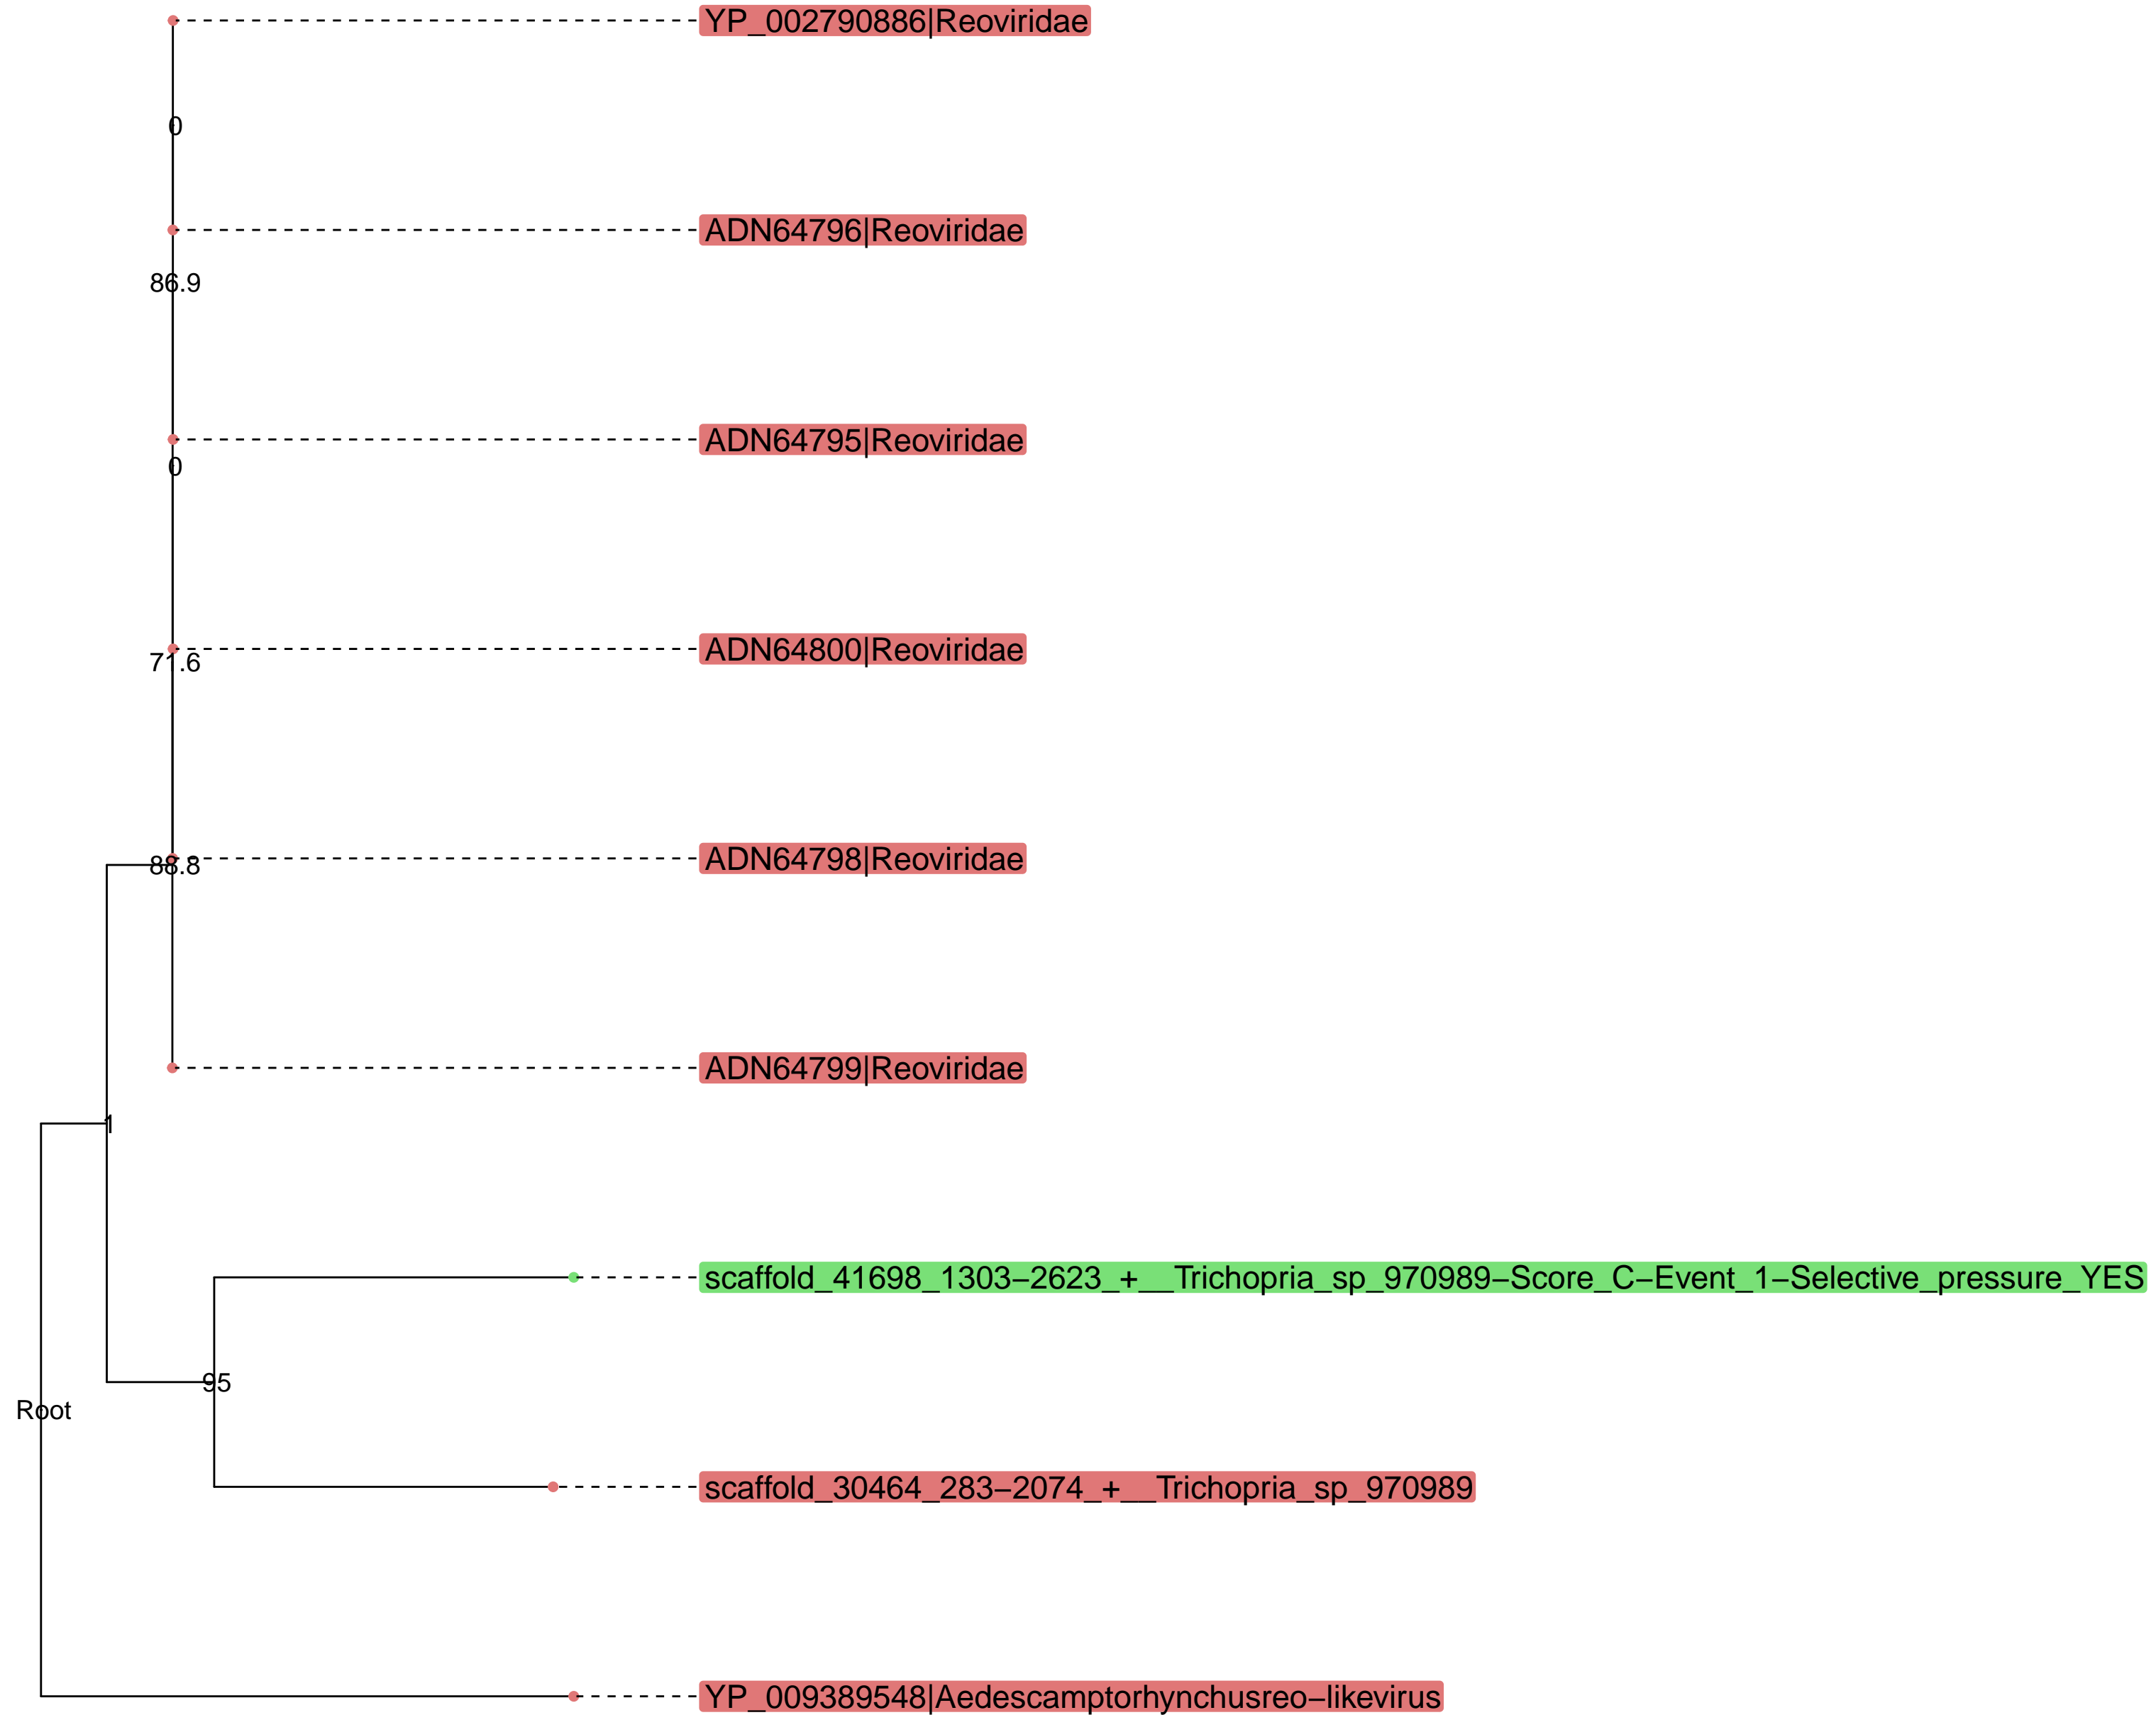

Cluster3348 – families involved : ['Nudiviridae'] – putative protein : ['GrBNV\_gp61-like protein']

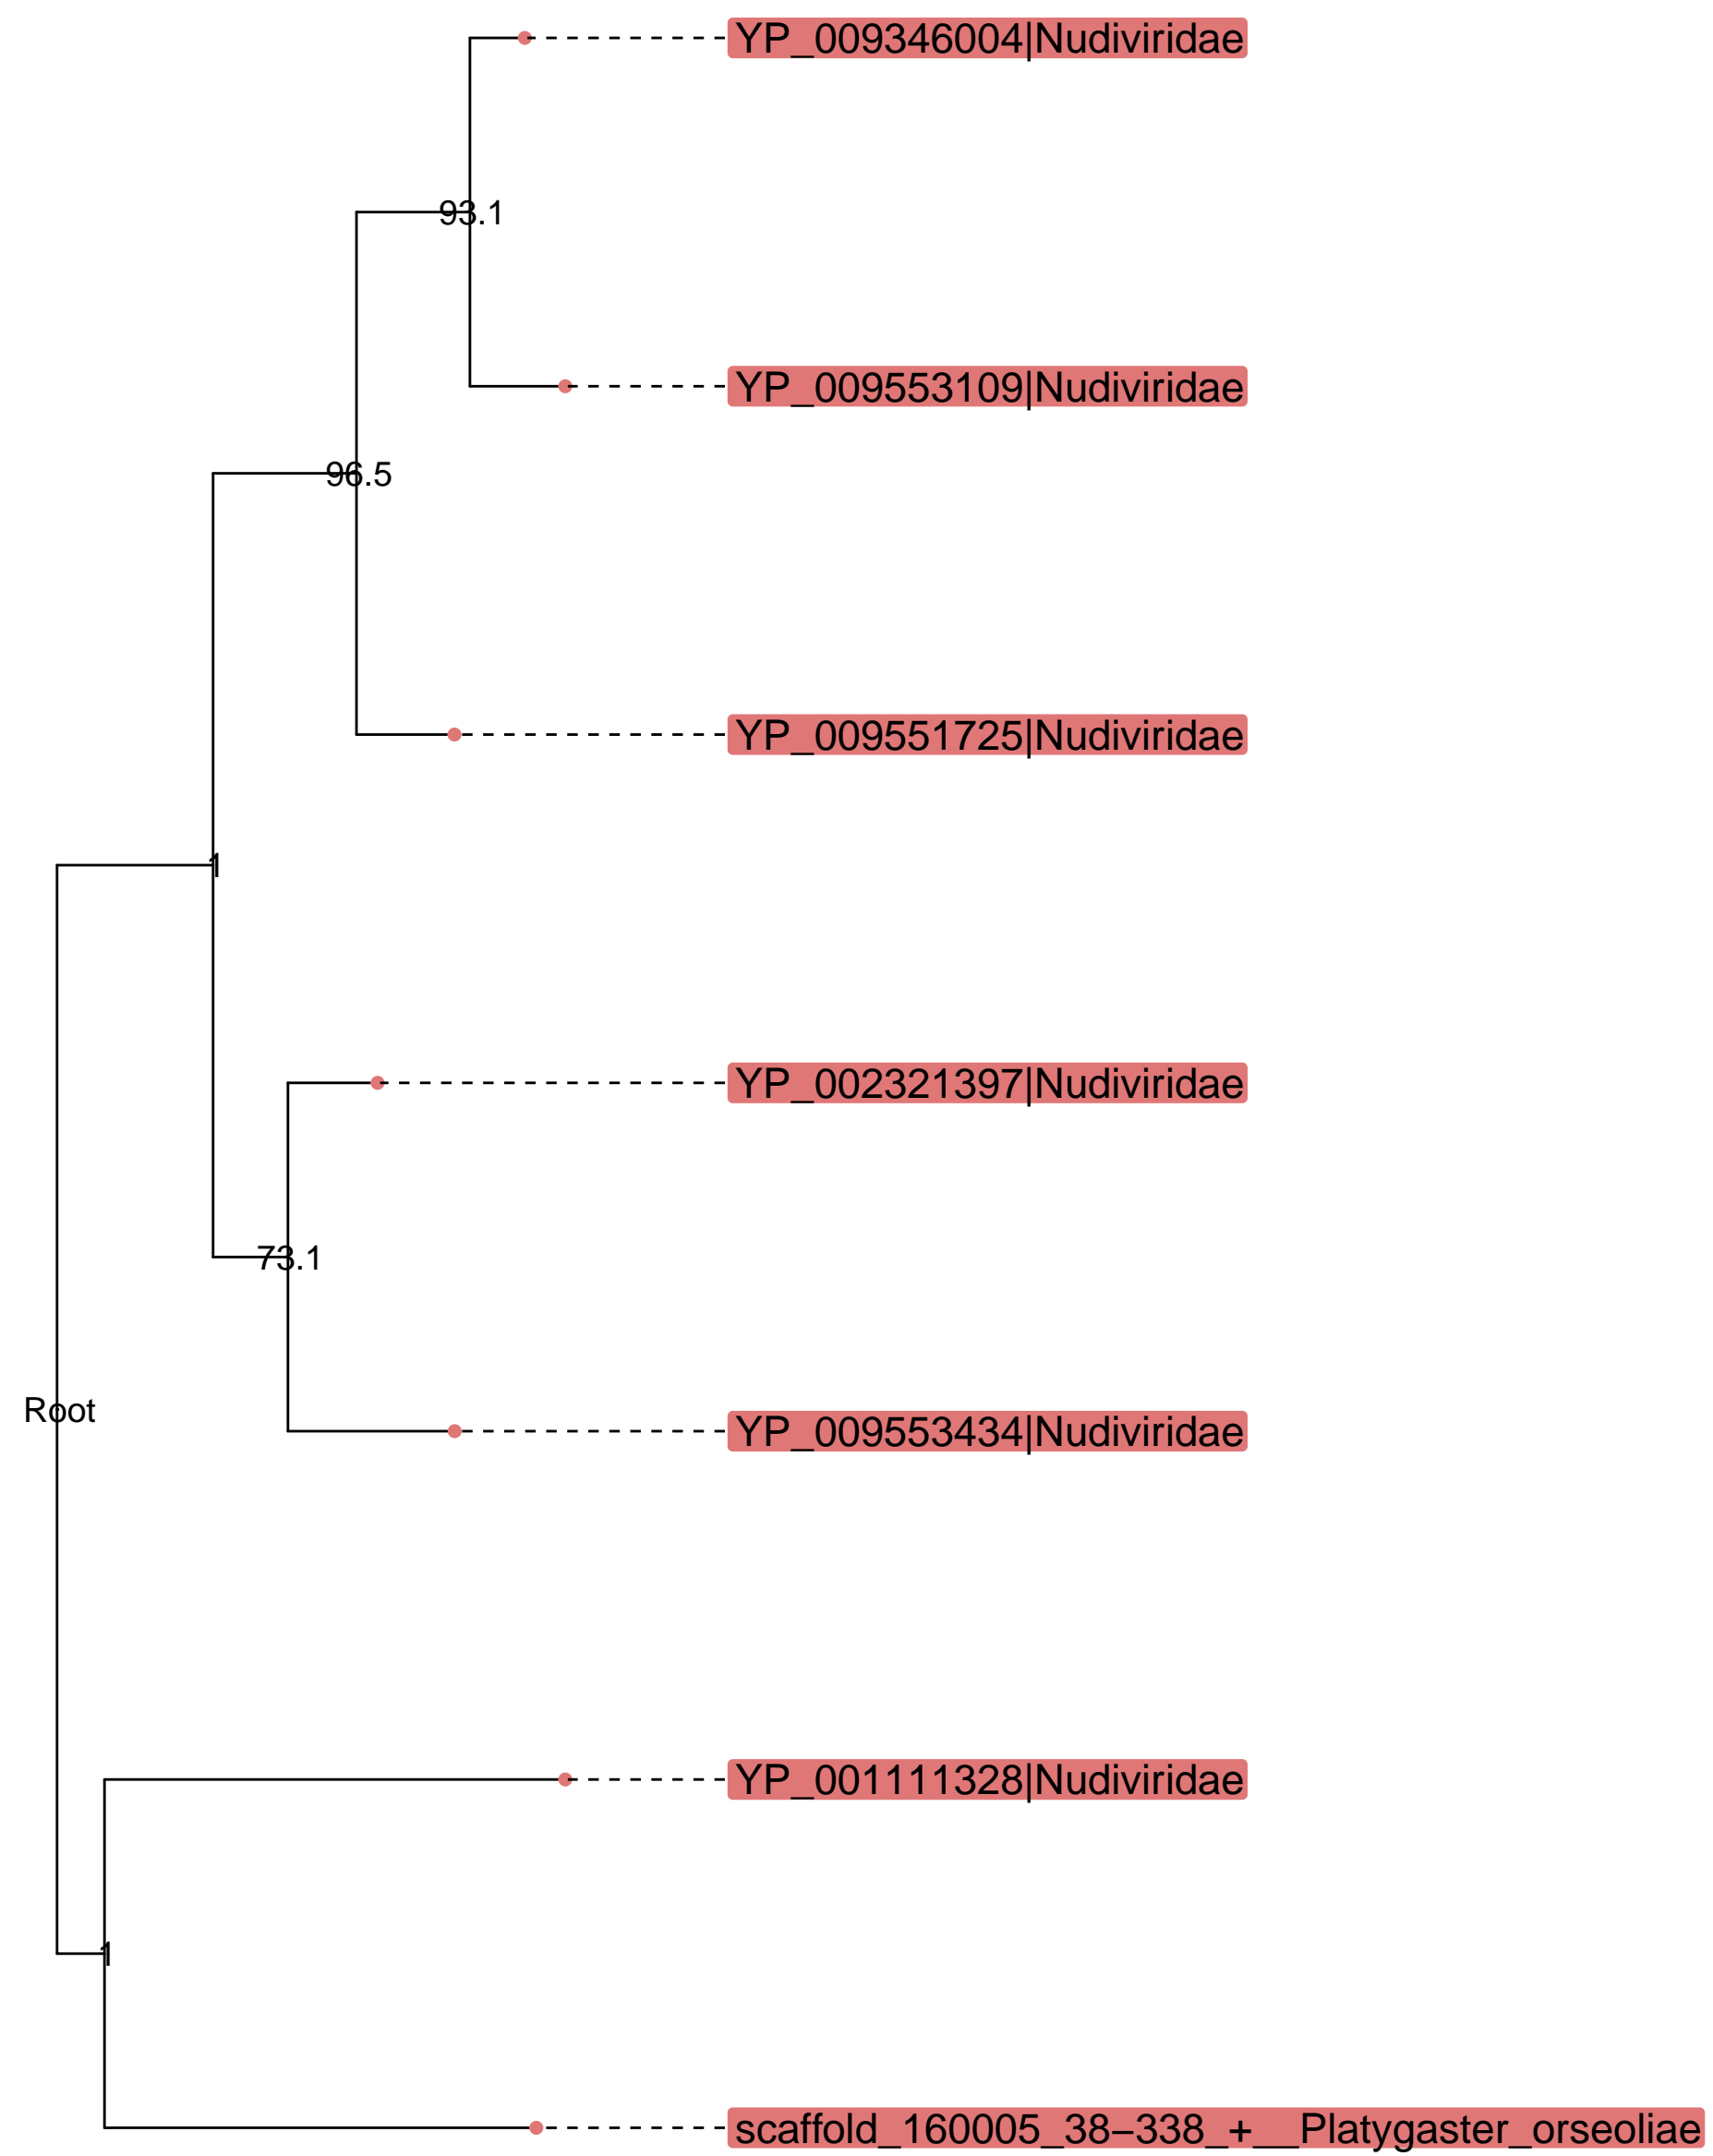

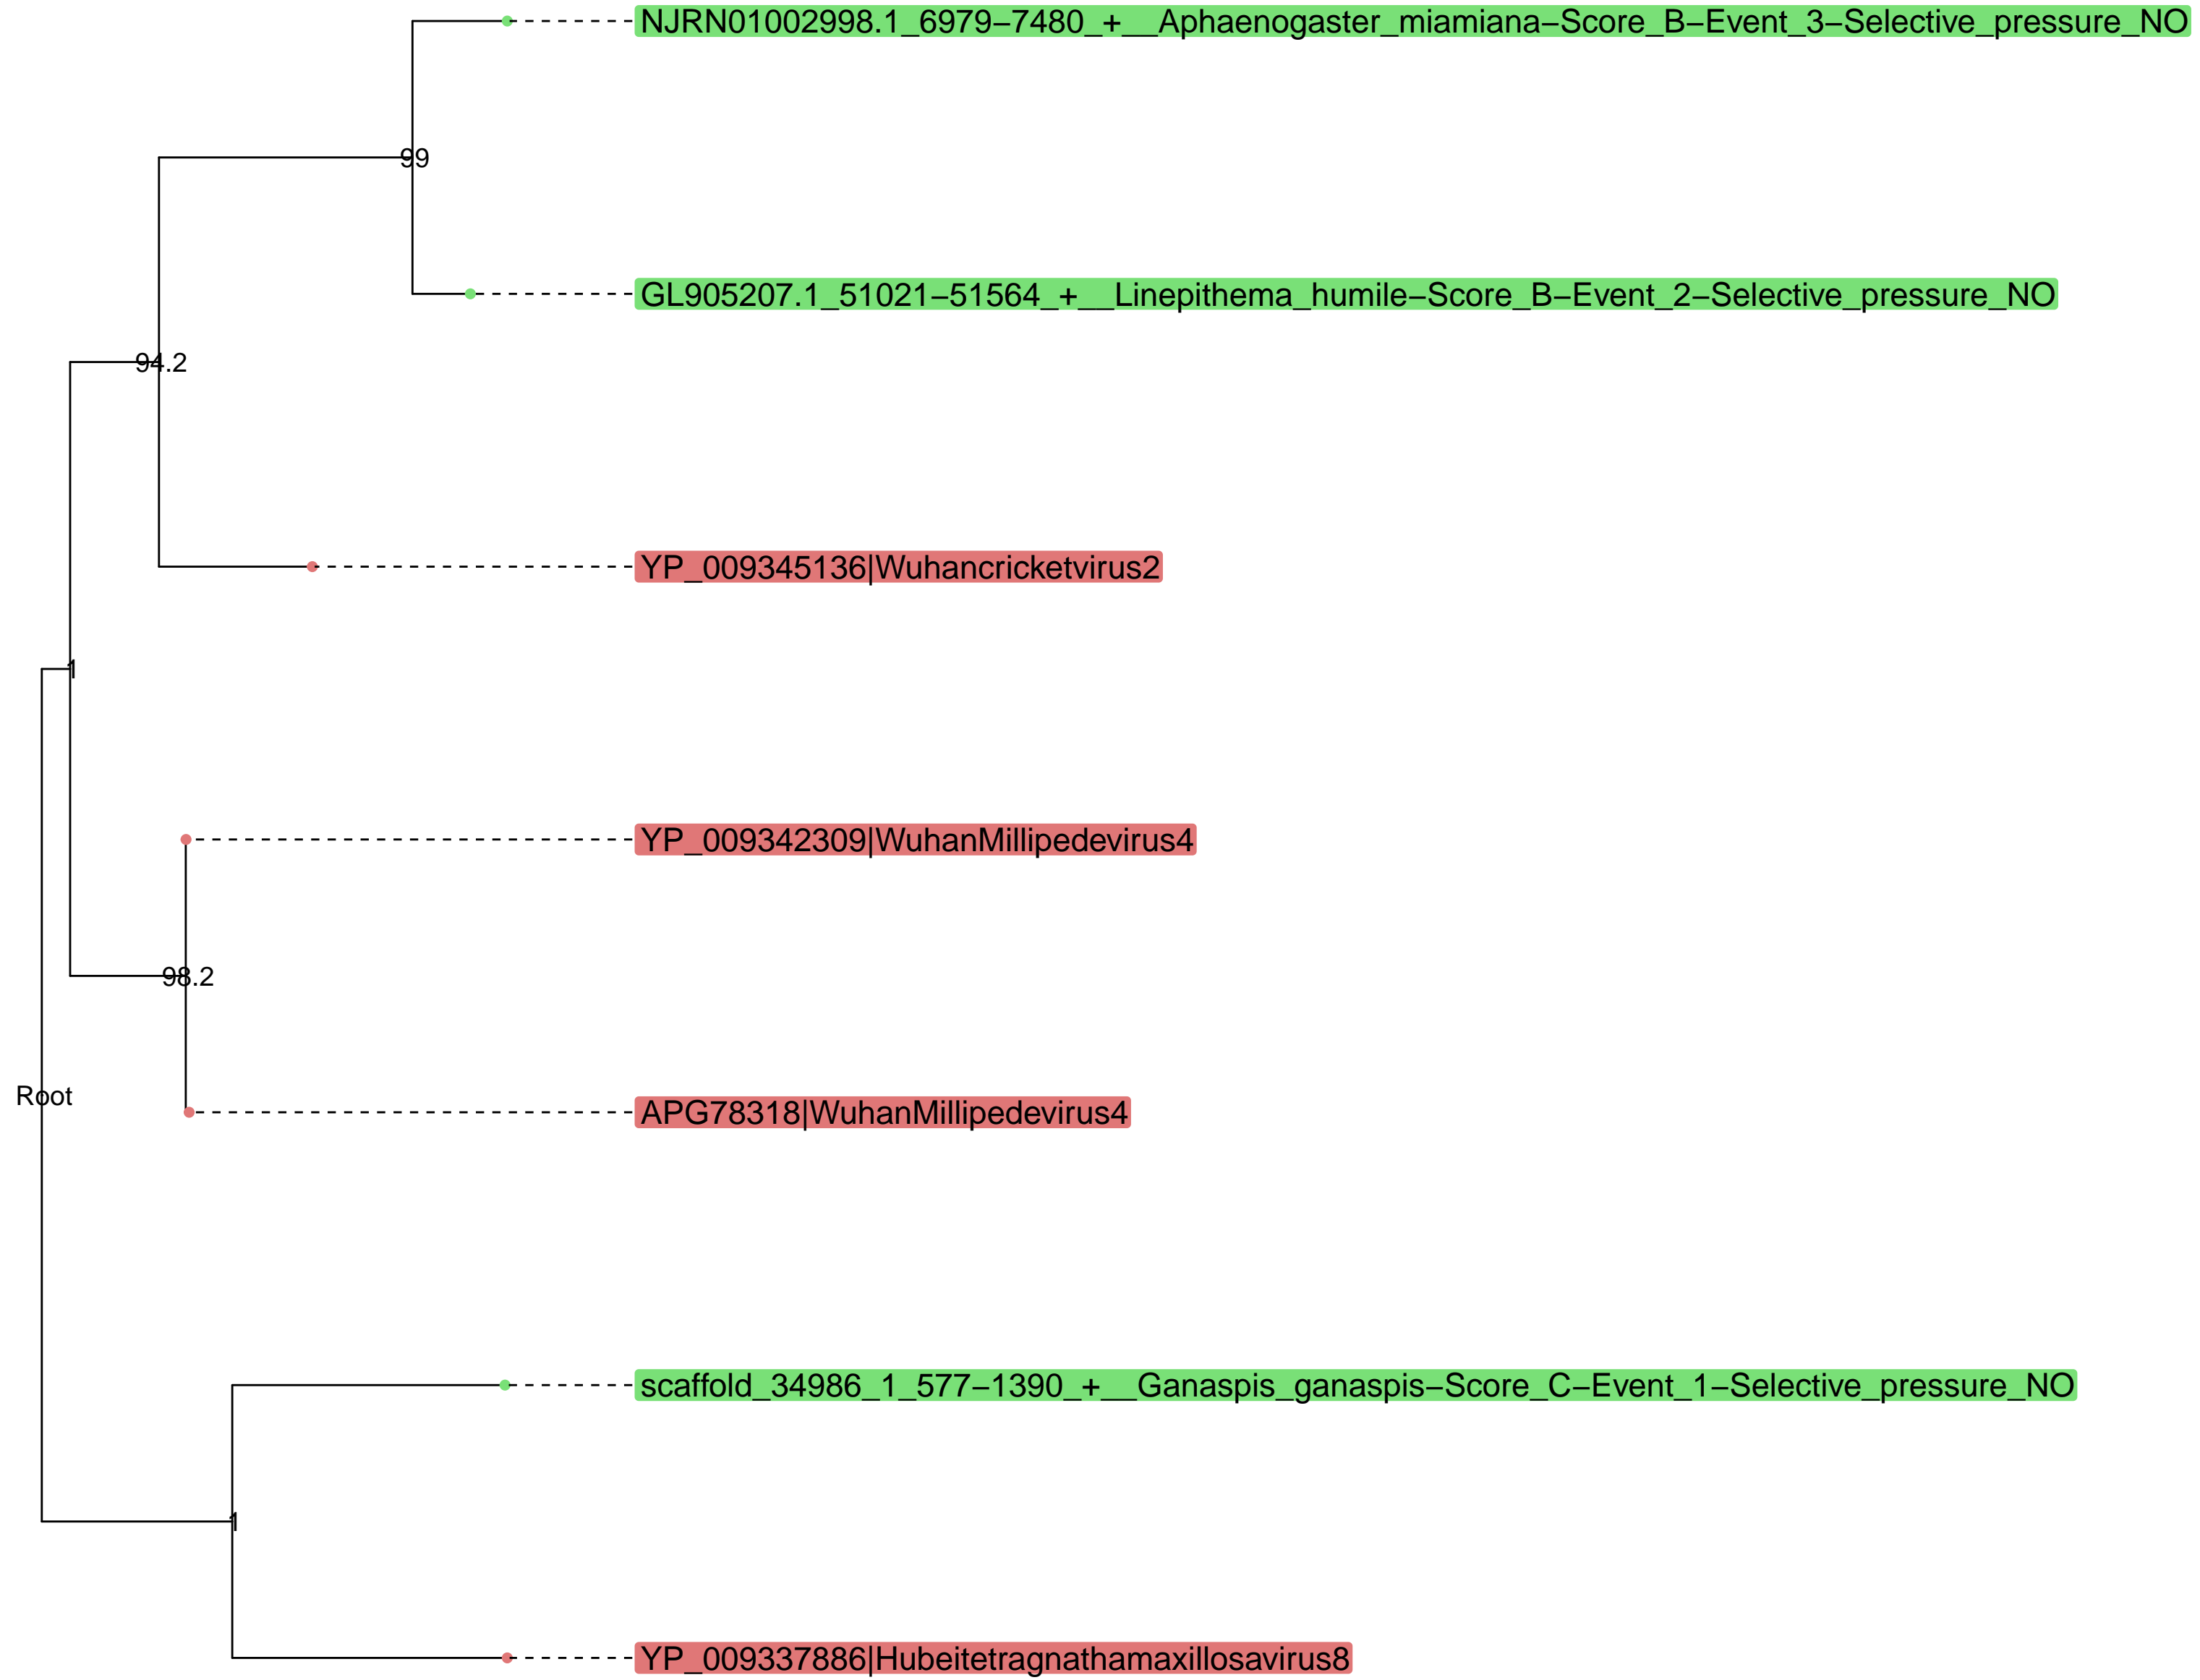

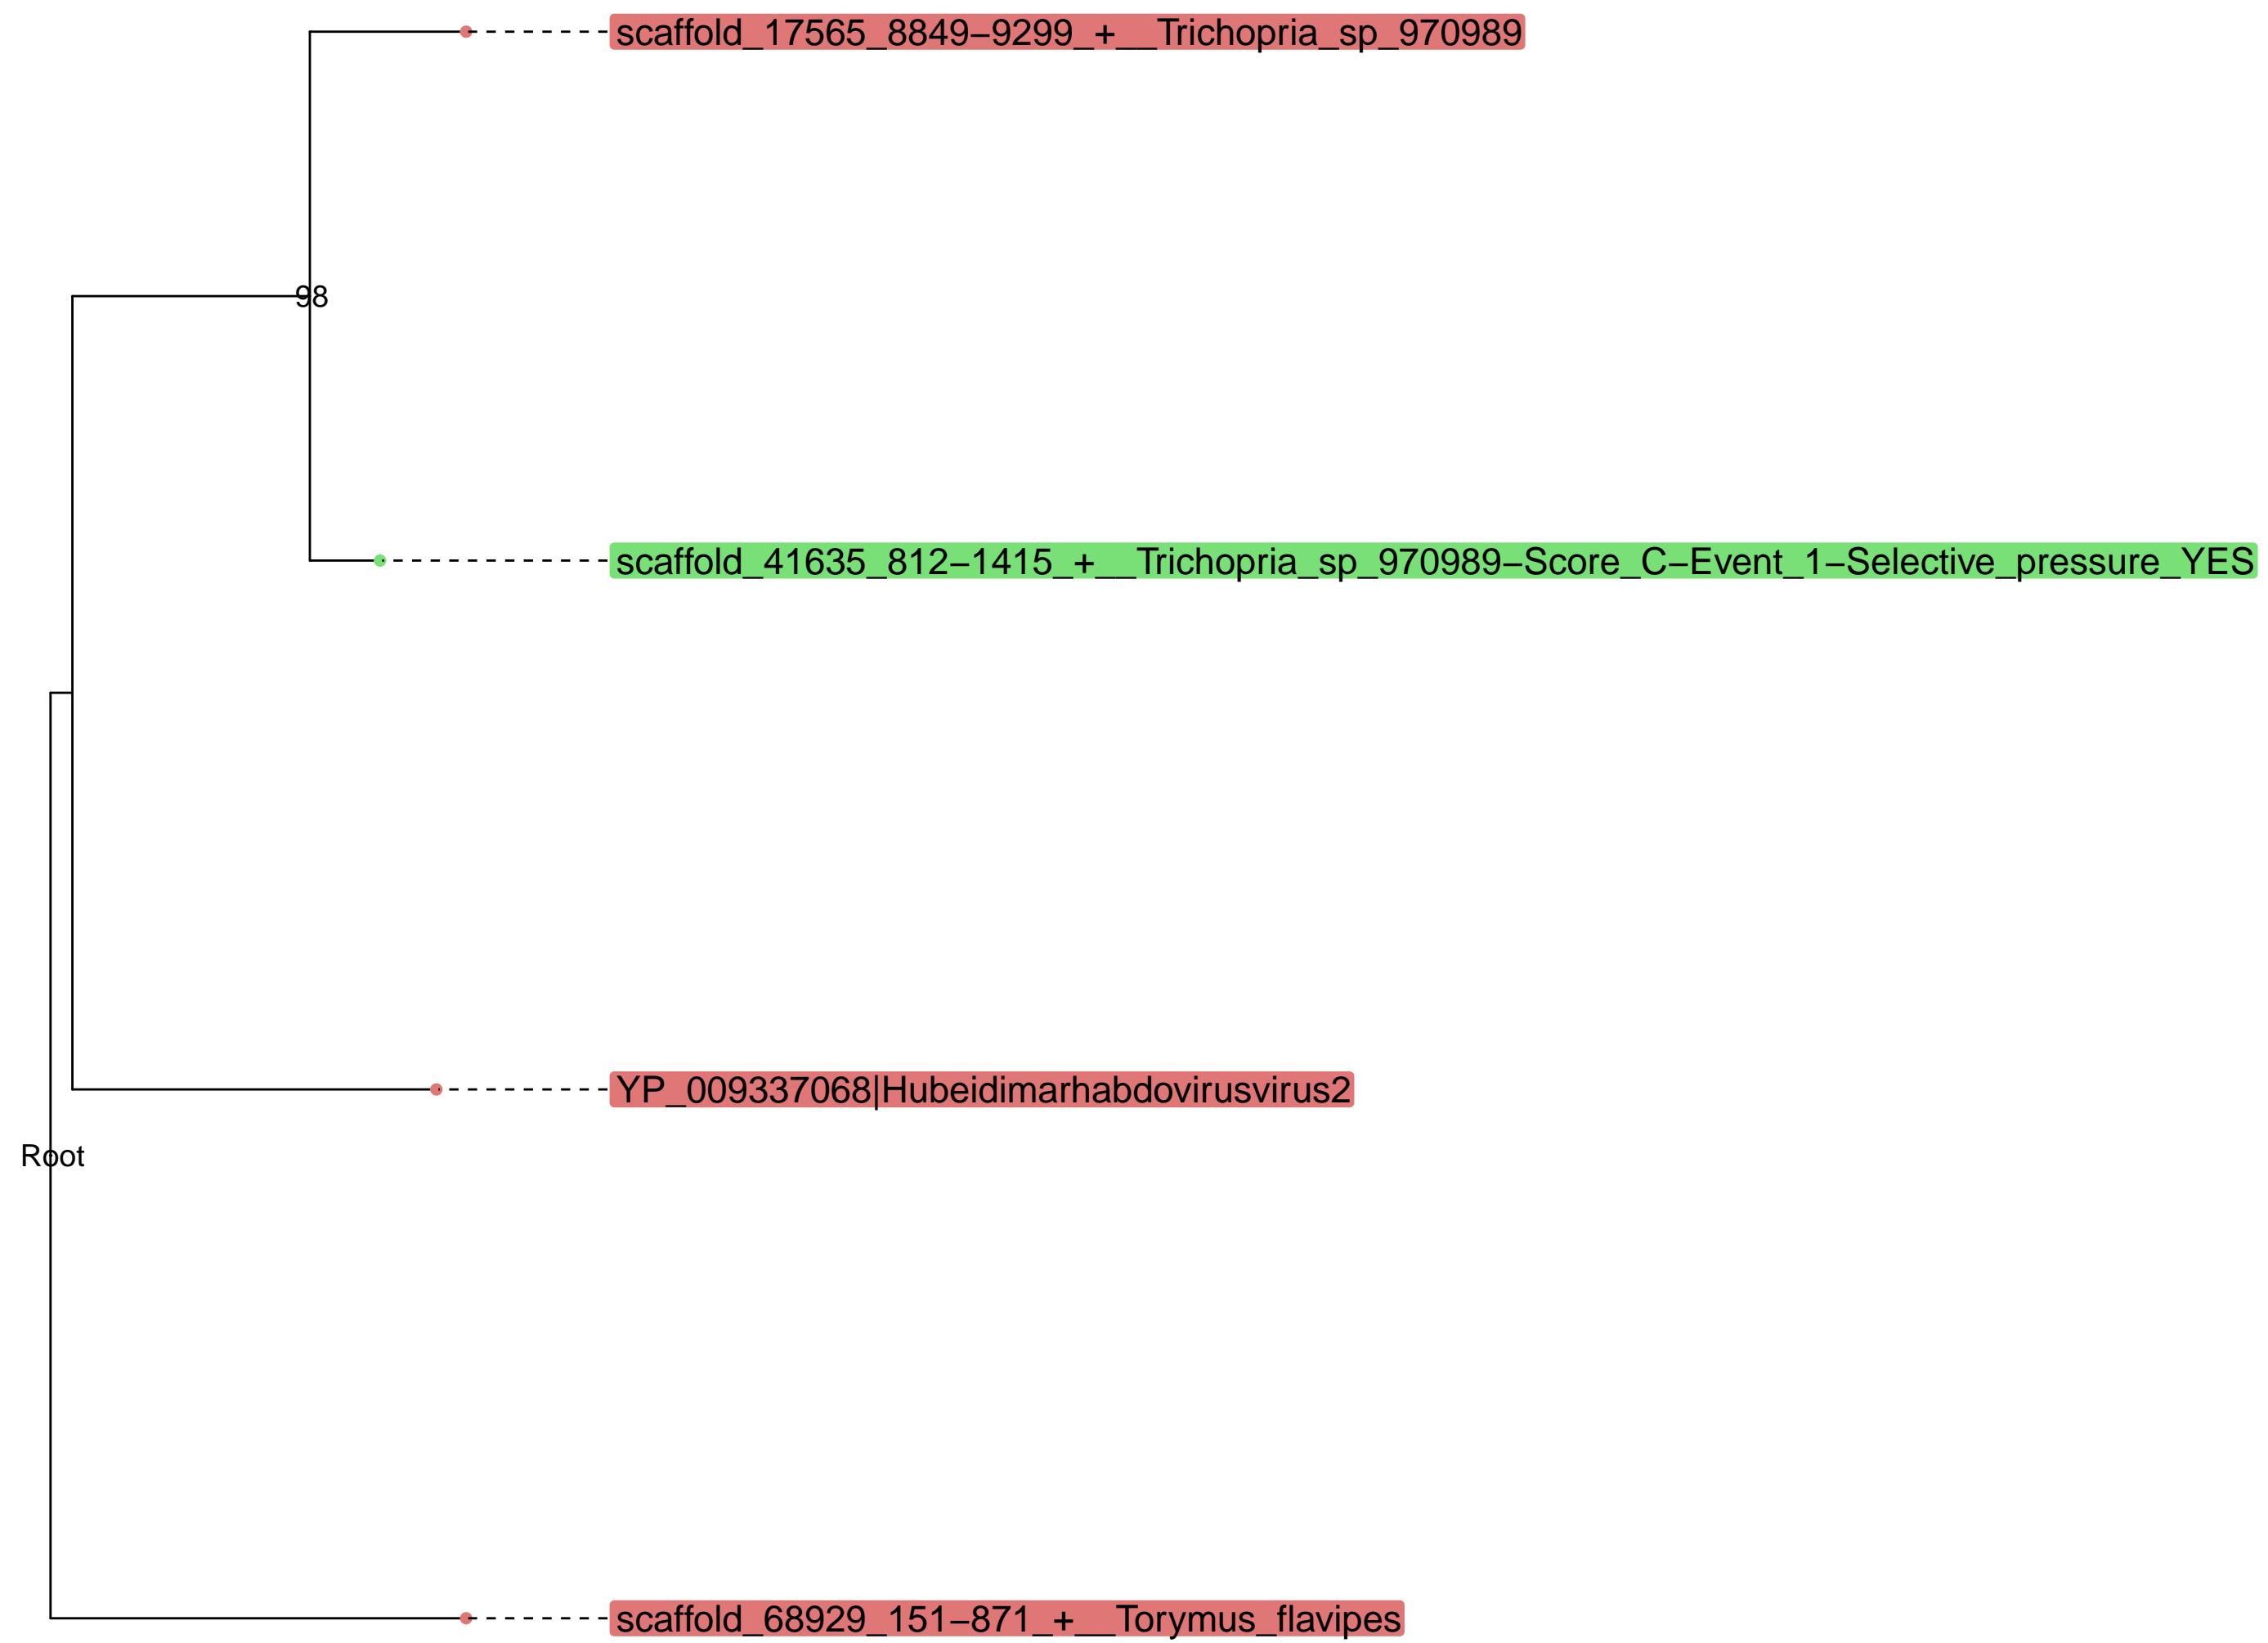

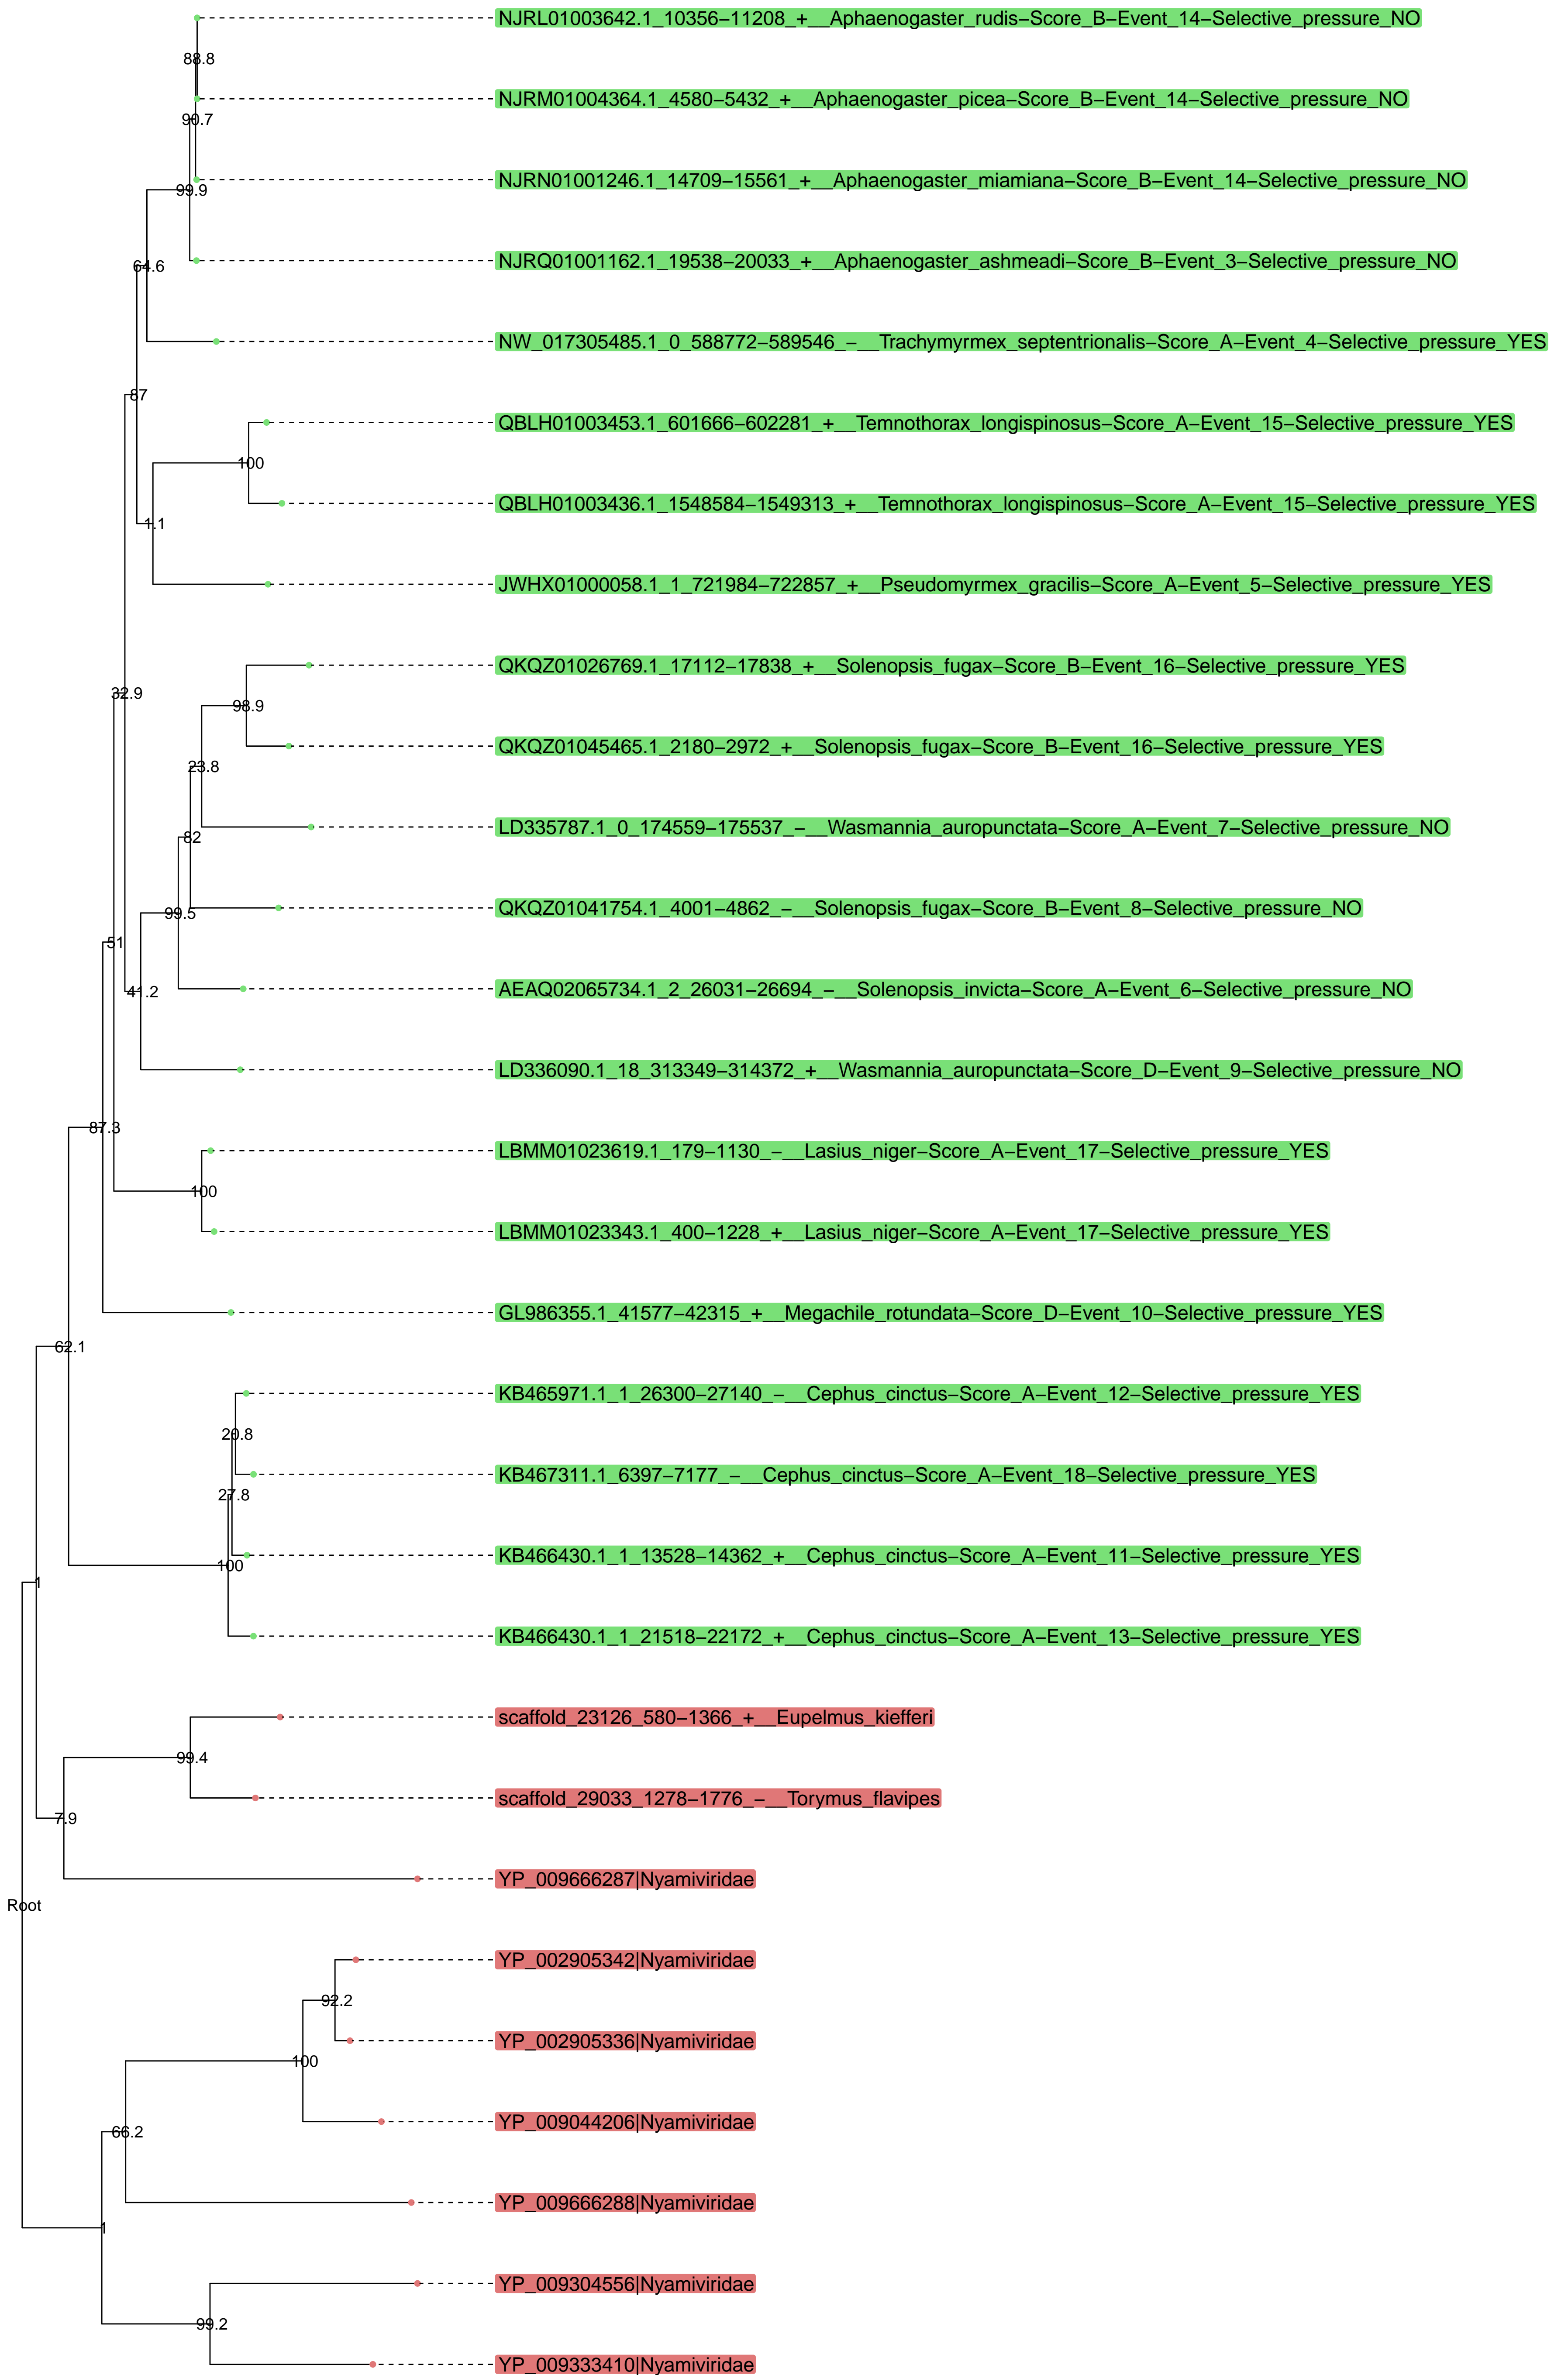



Cluster17945 – families involved : ['Iridoviridae'] – putative protein : ['Immune reactive putative protease inhibitor']

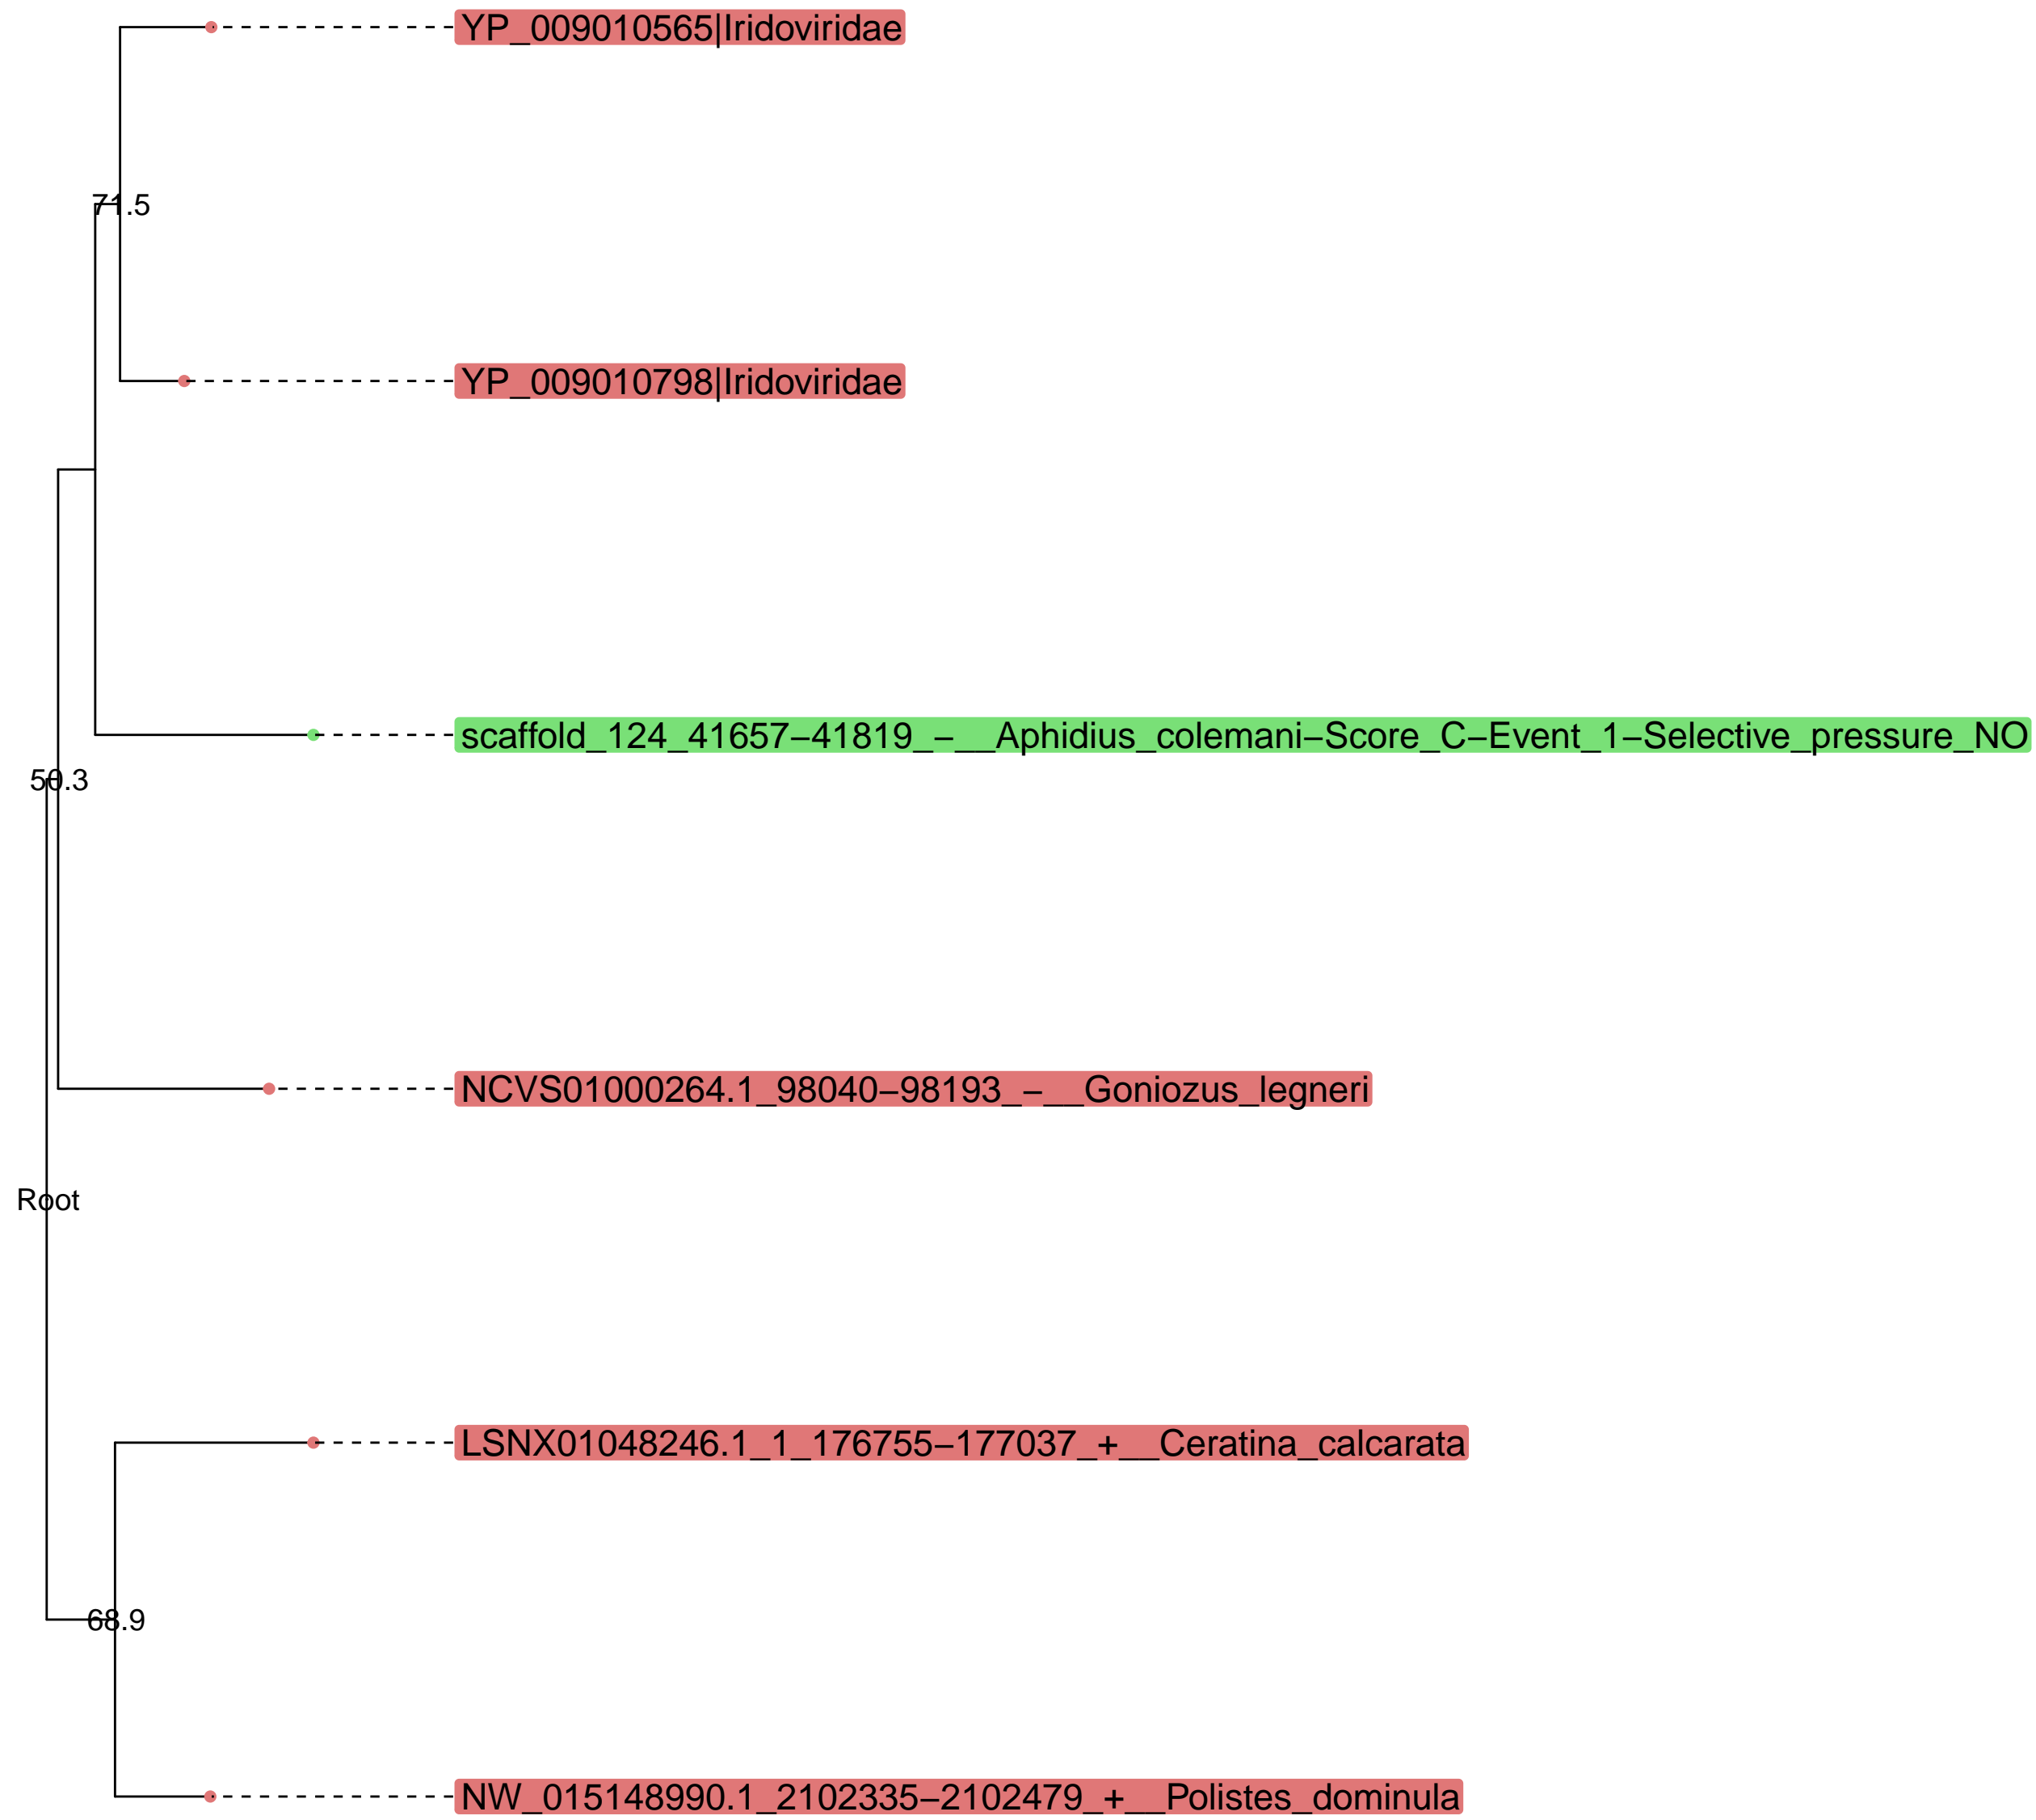

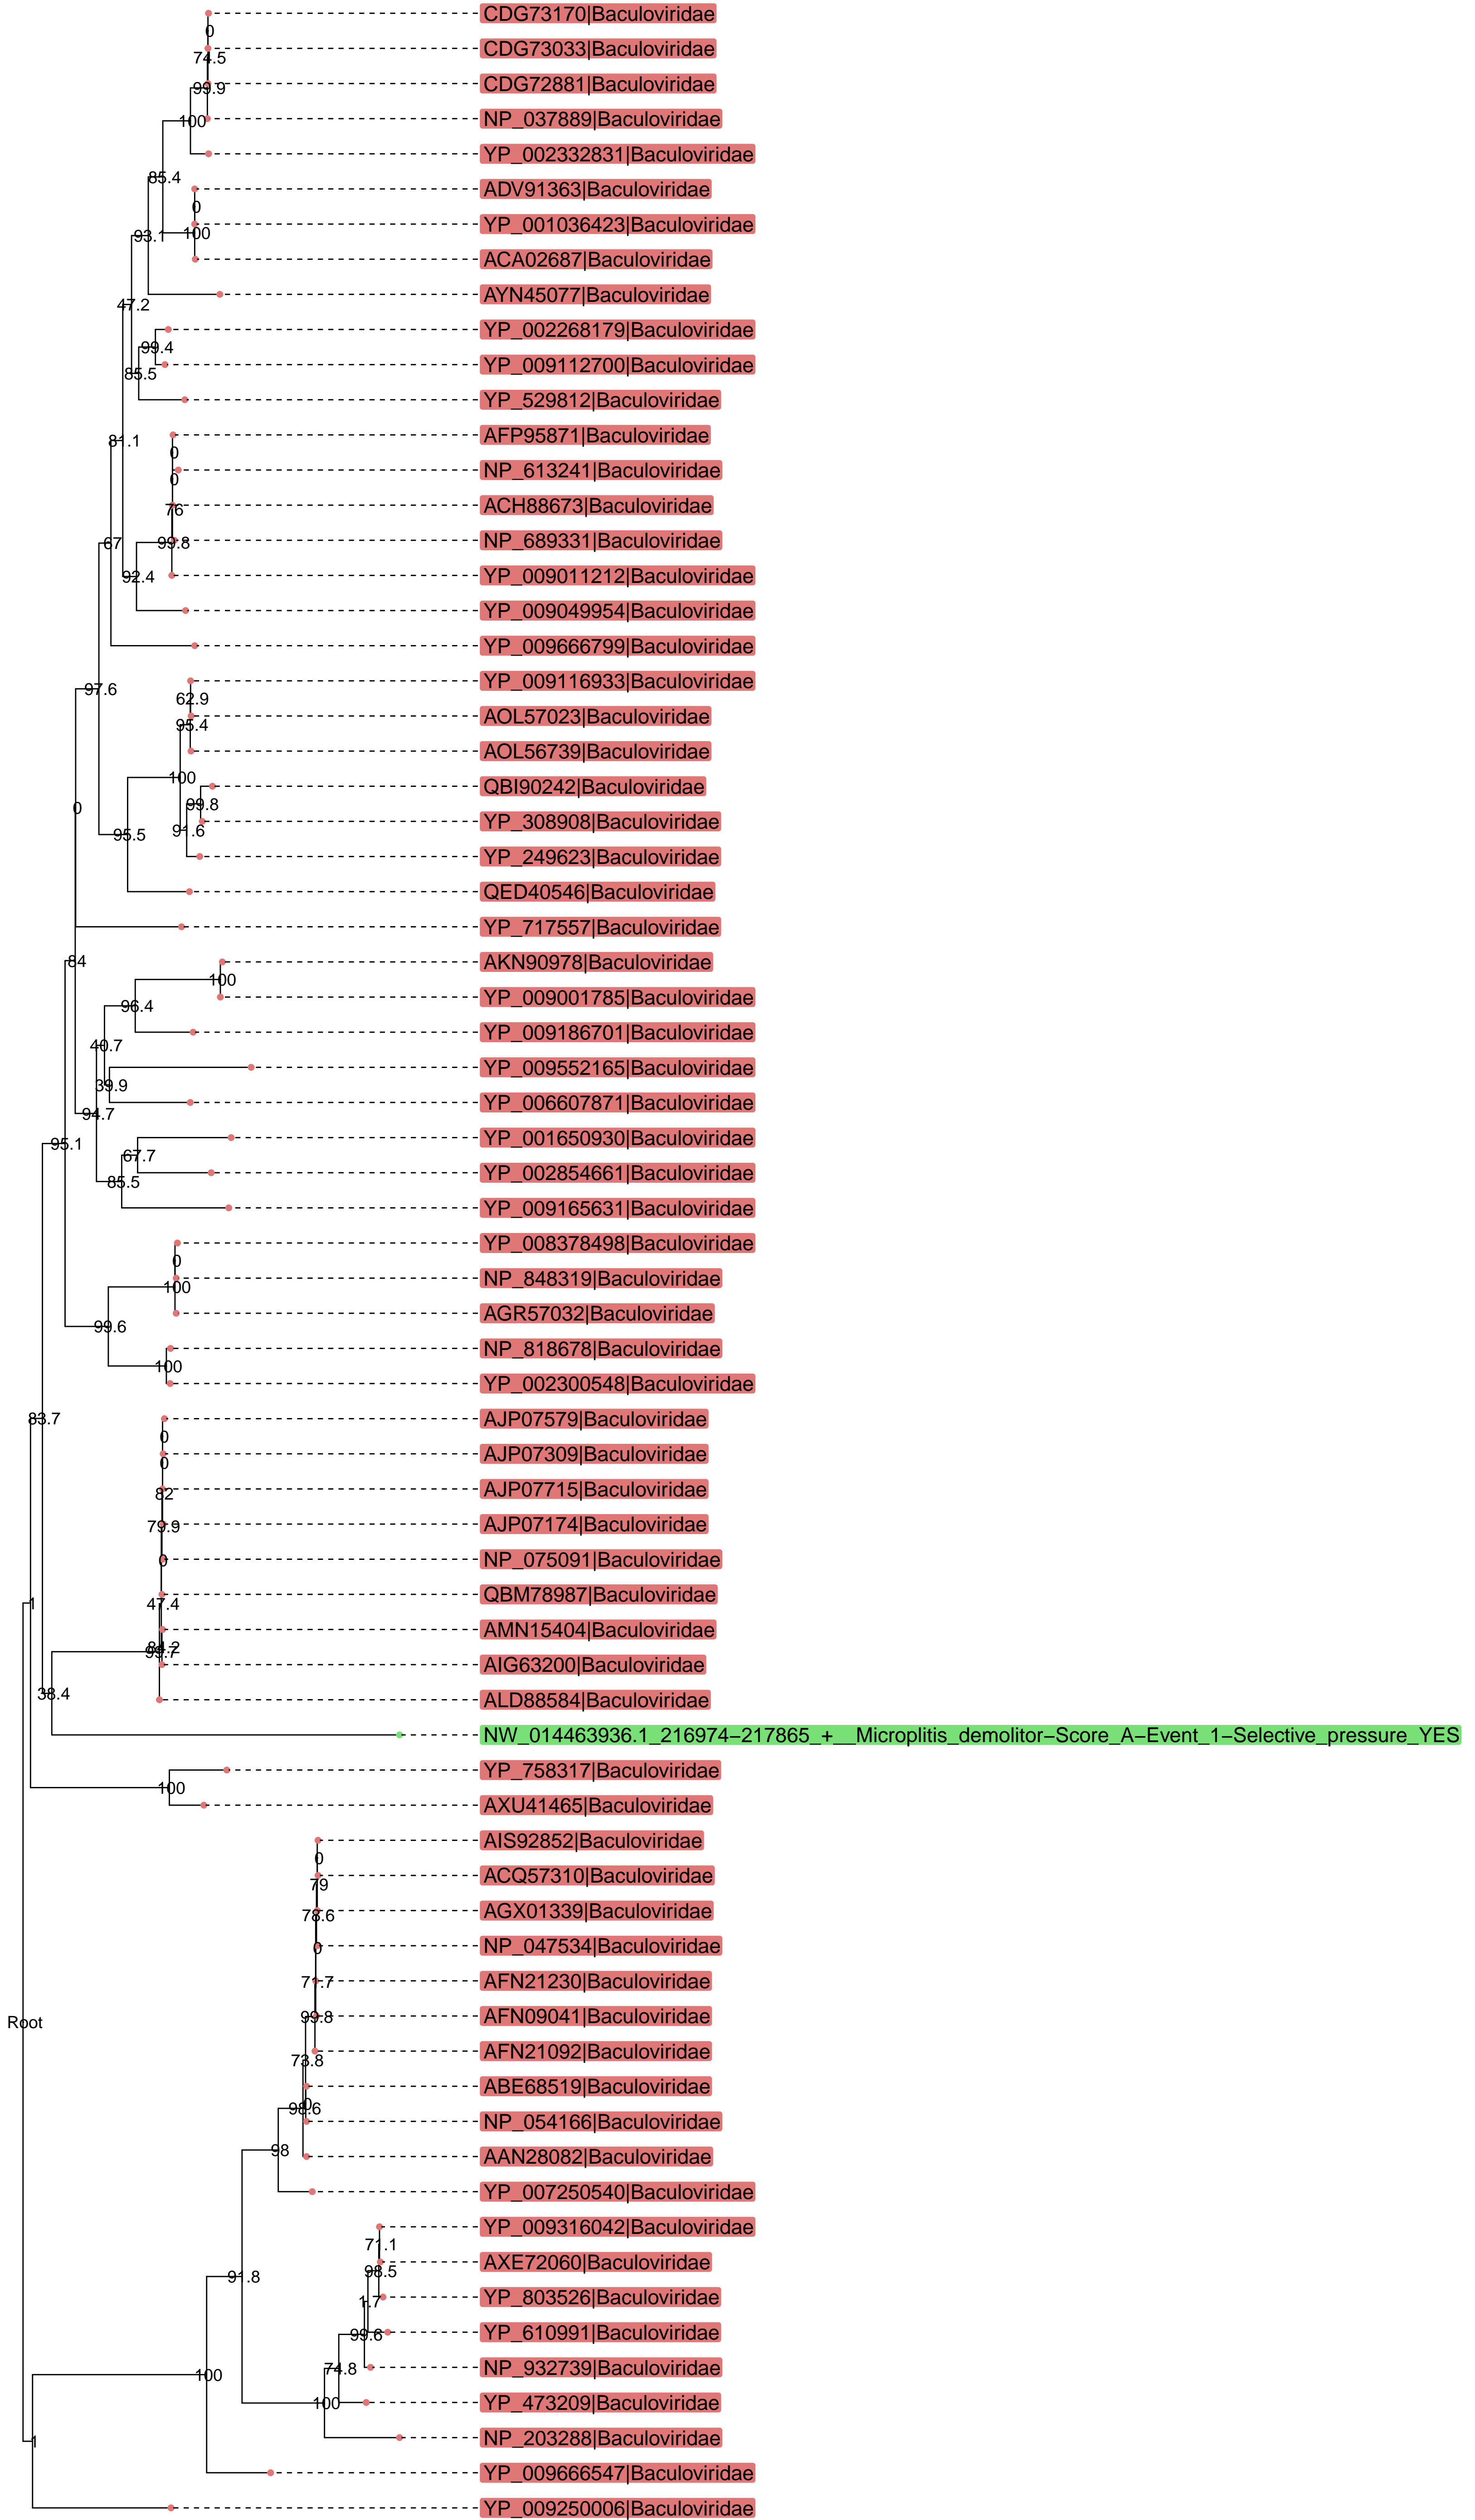

Cluster3538 – families involved : ['Apis\_filamentous-like'] – putative protein : ['Borrelia outer surface protein E']

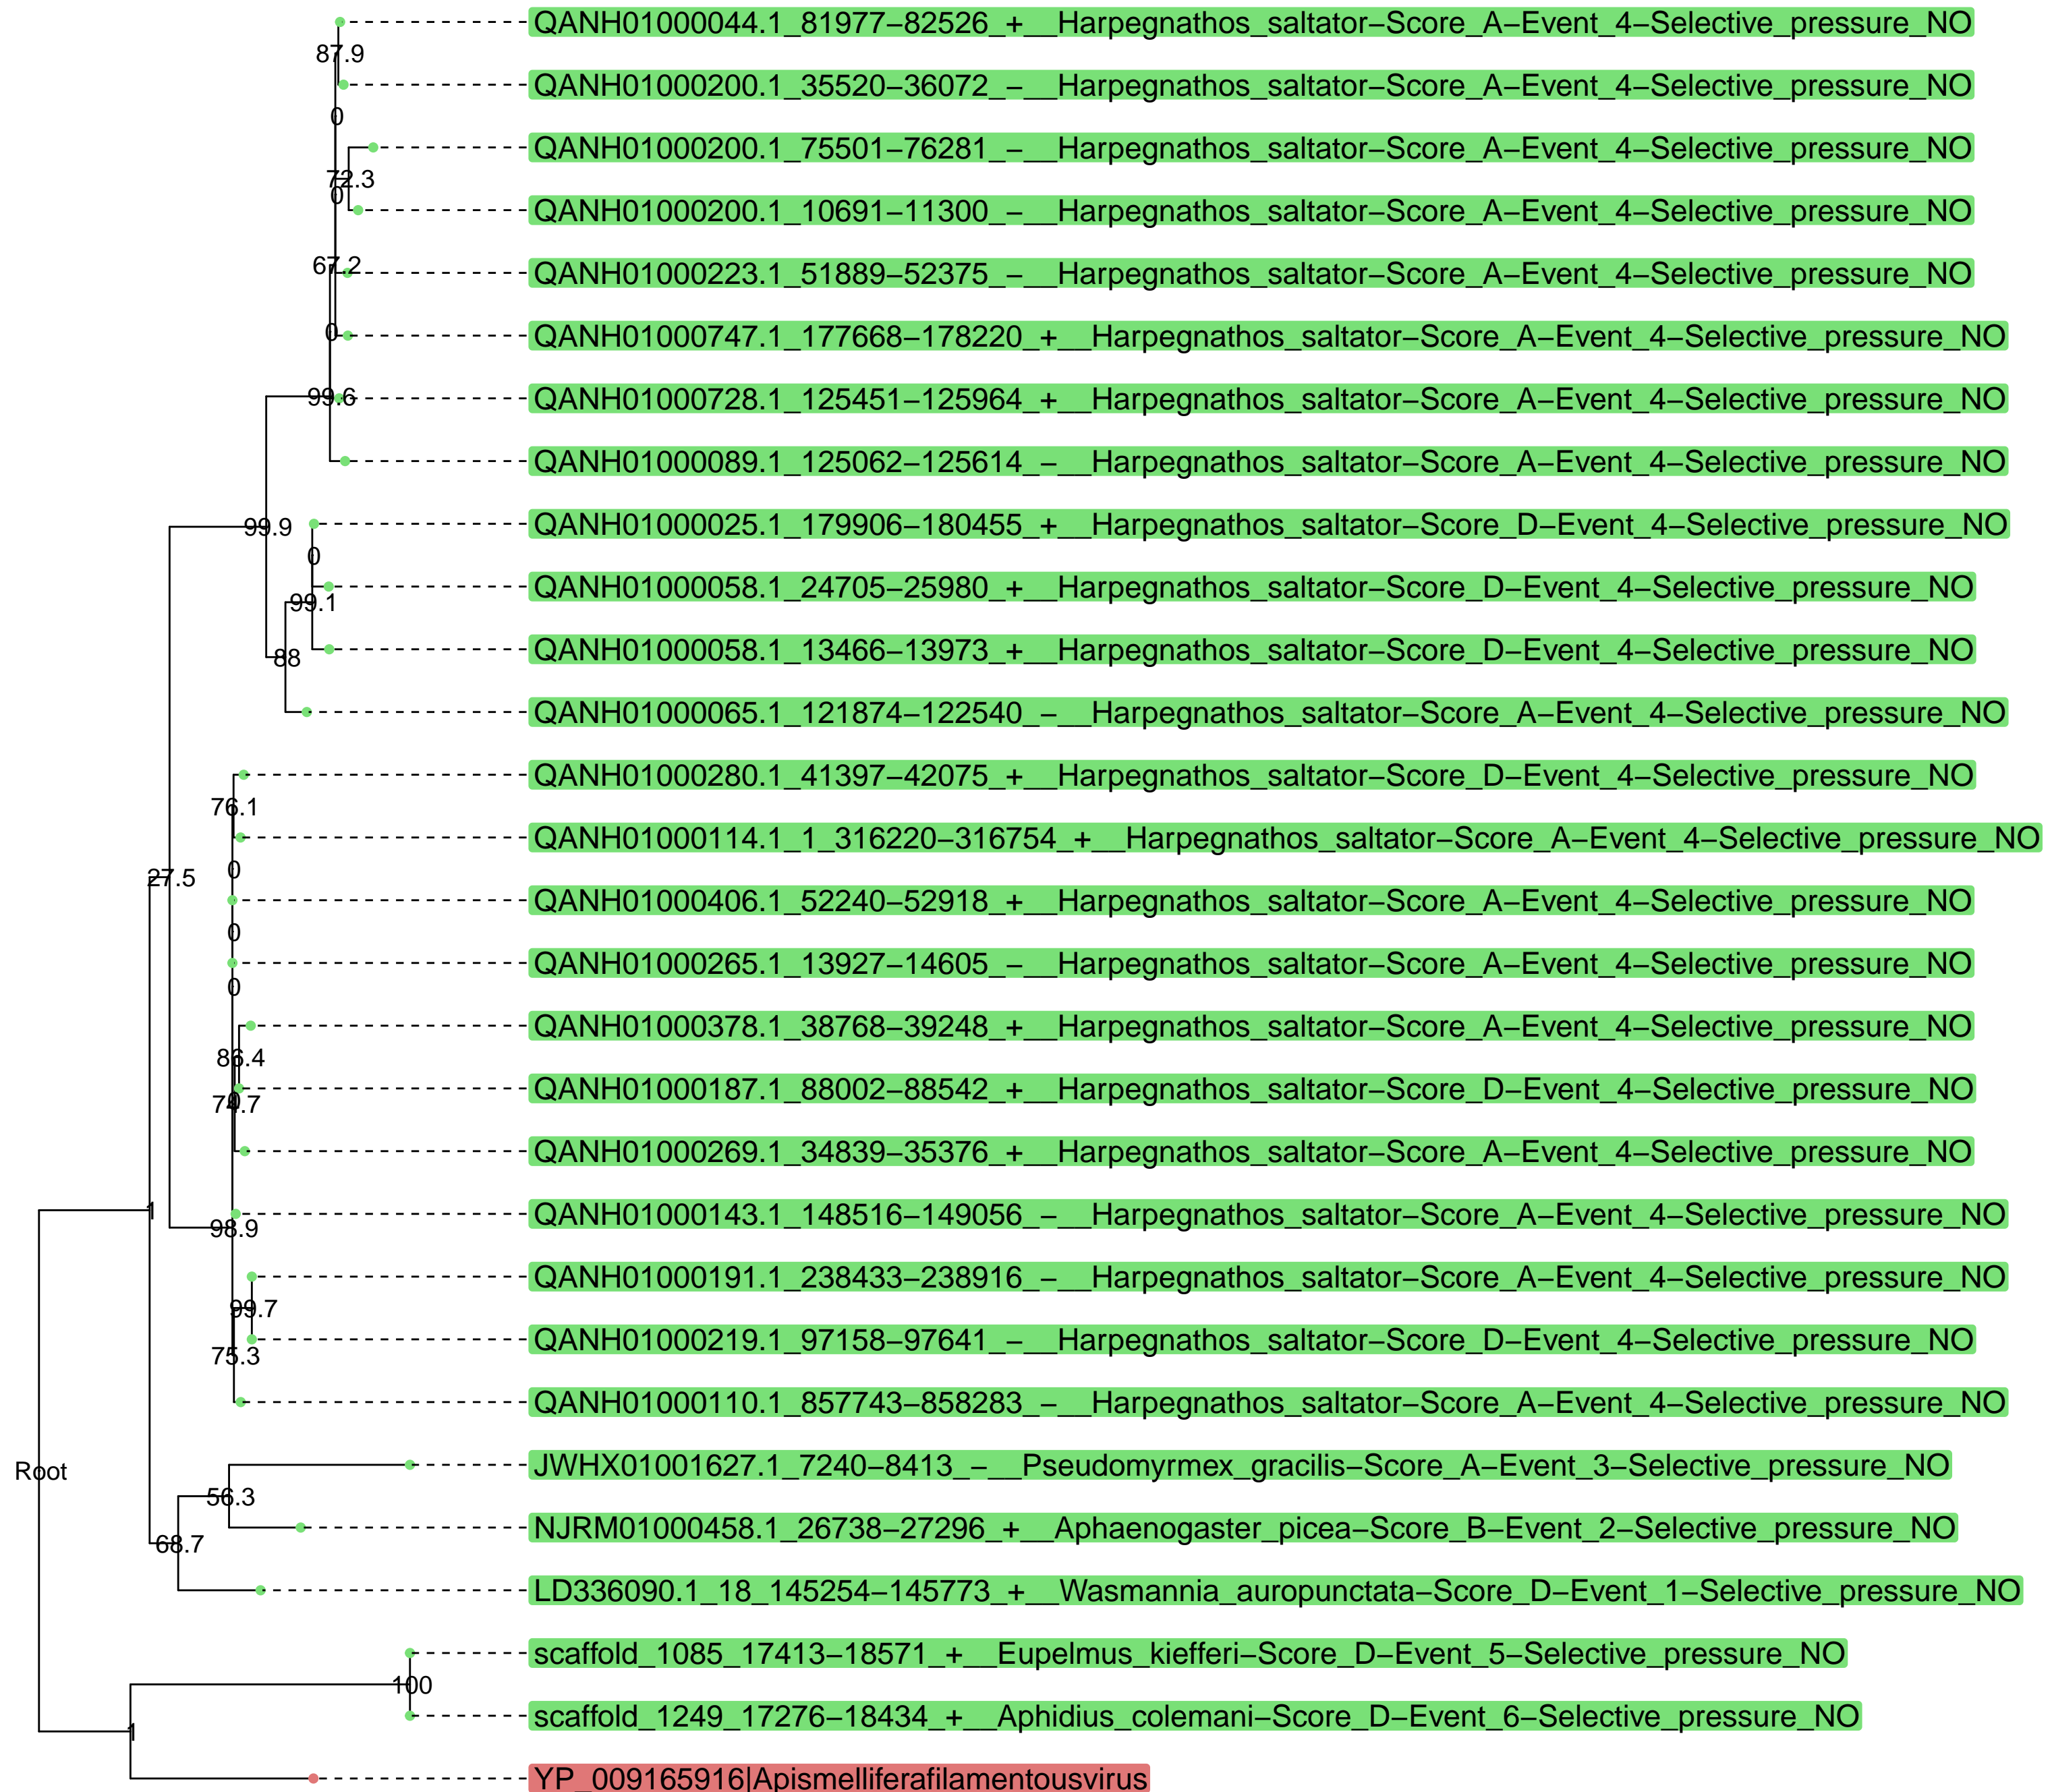

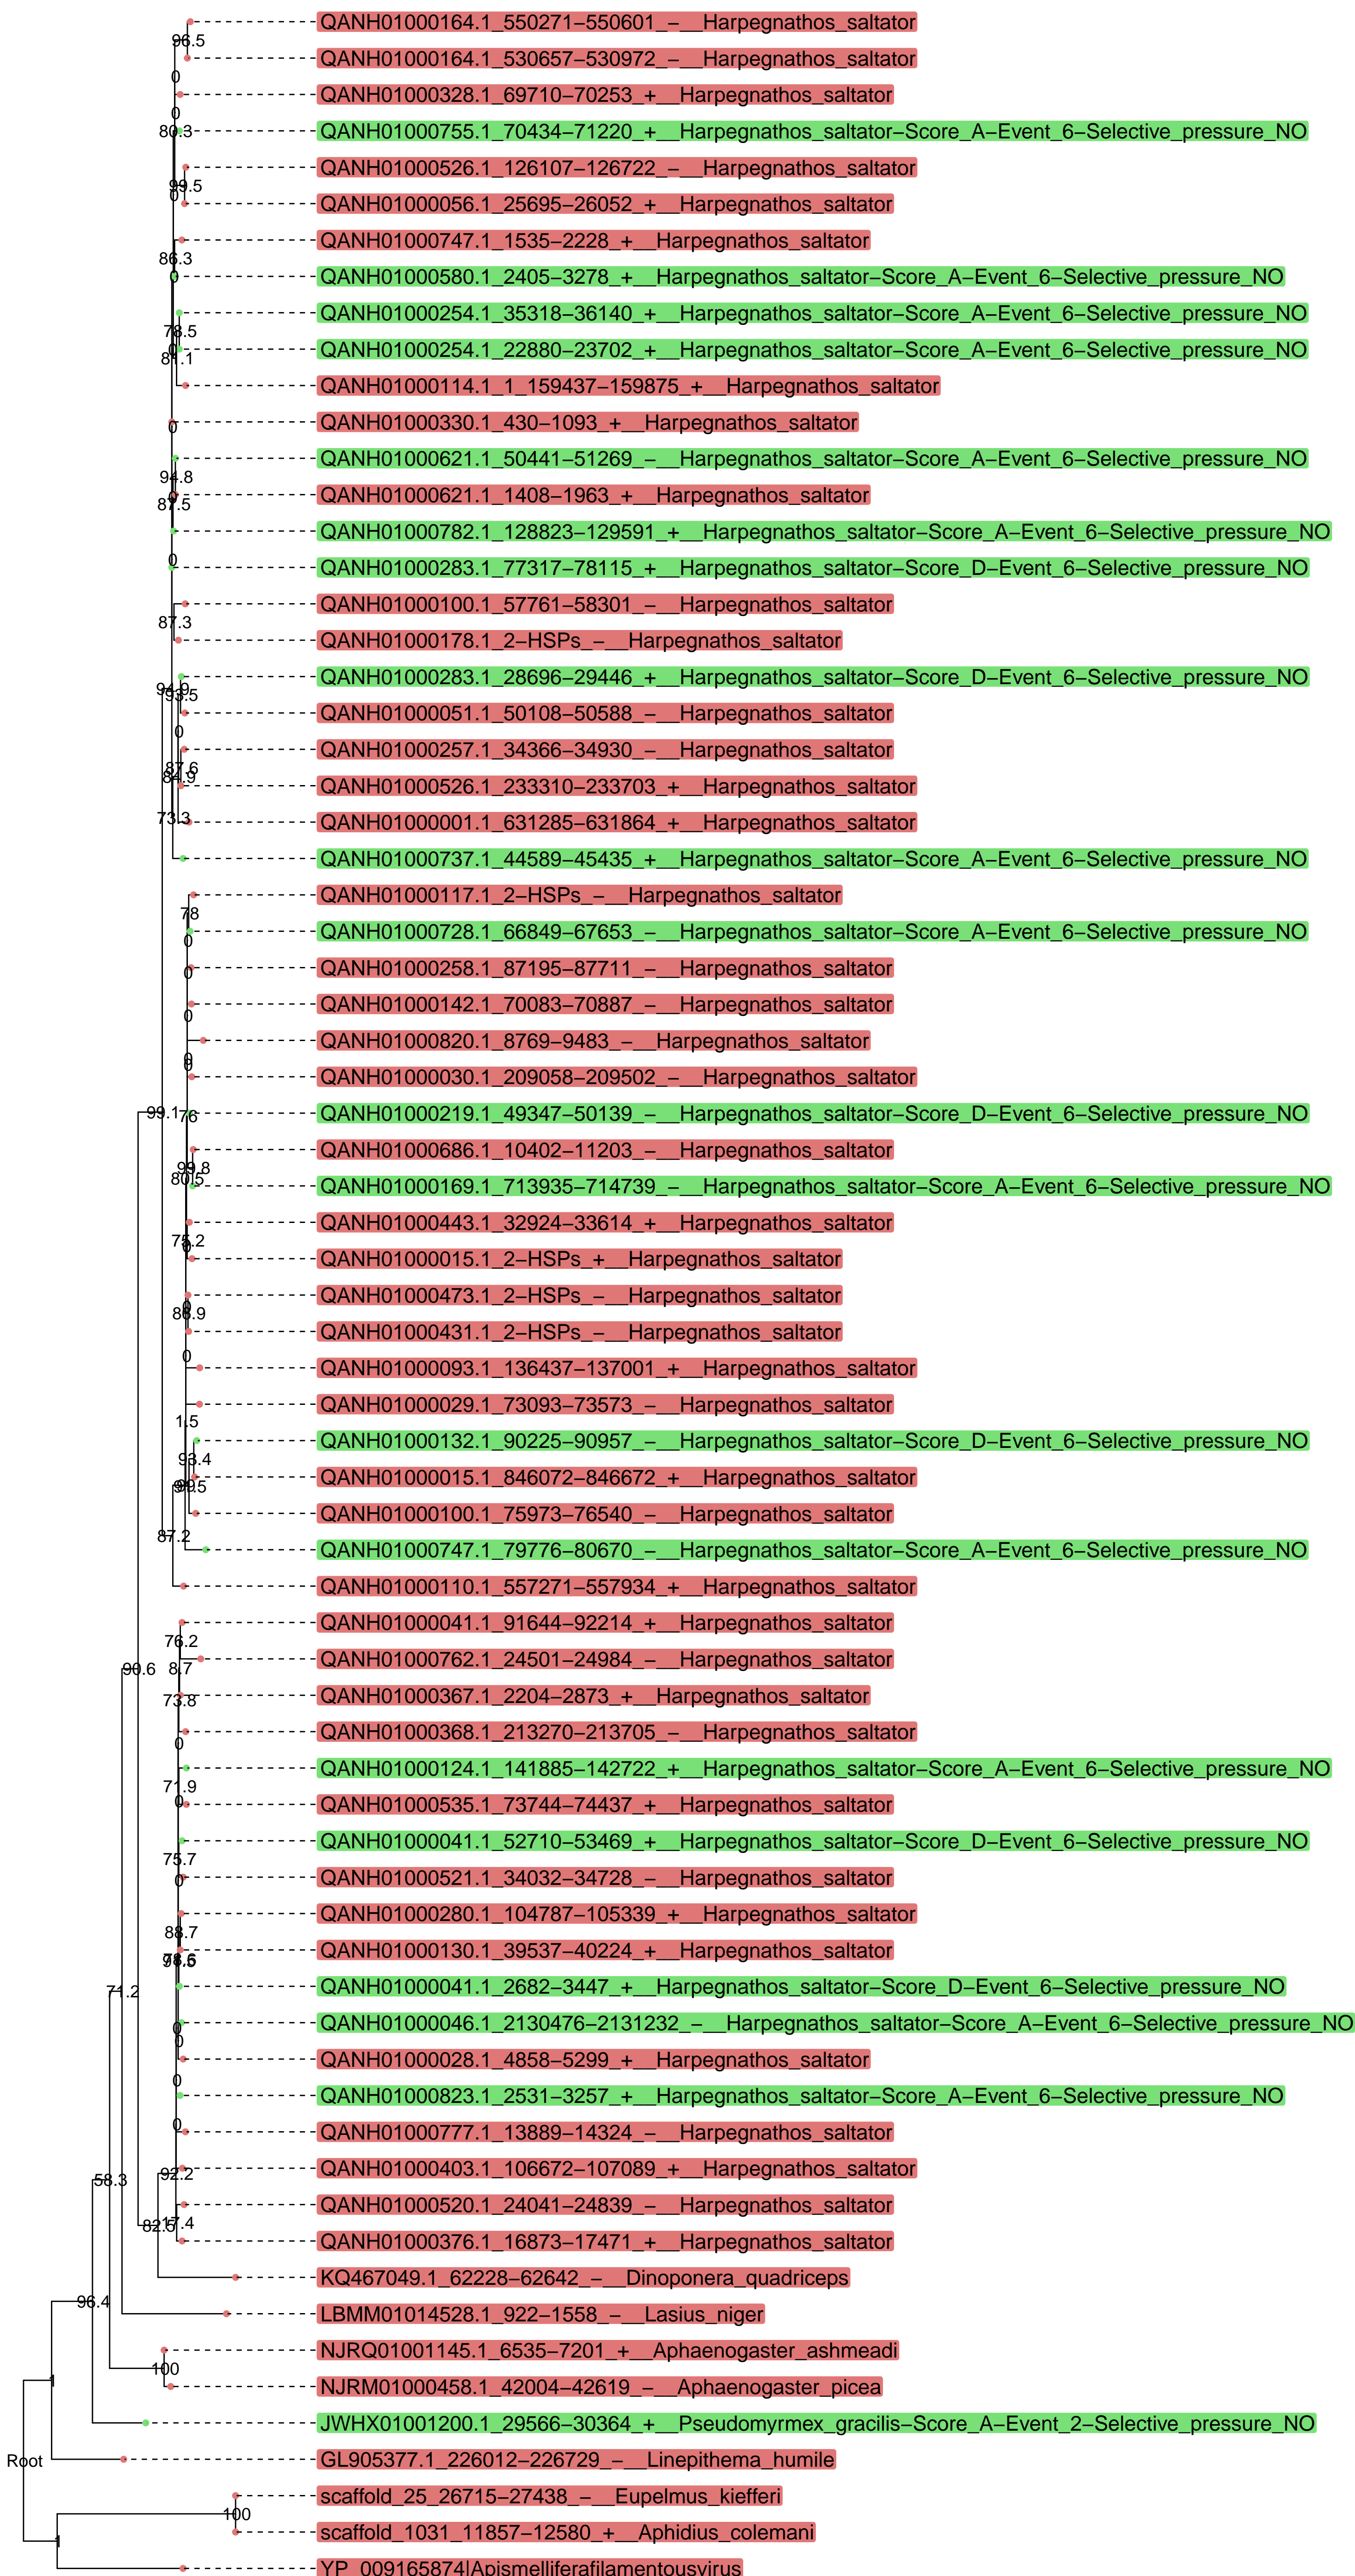

Cluster22359 – families involved : ['Apis\_filamentous-like'] – putative protein : ['Protein of unknown function (DUF3847)']

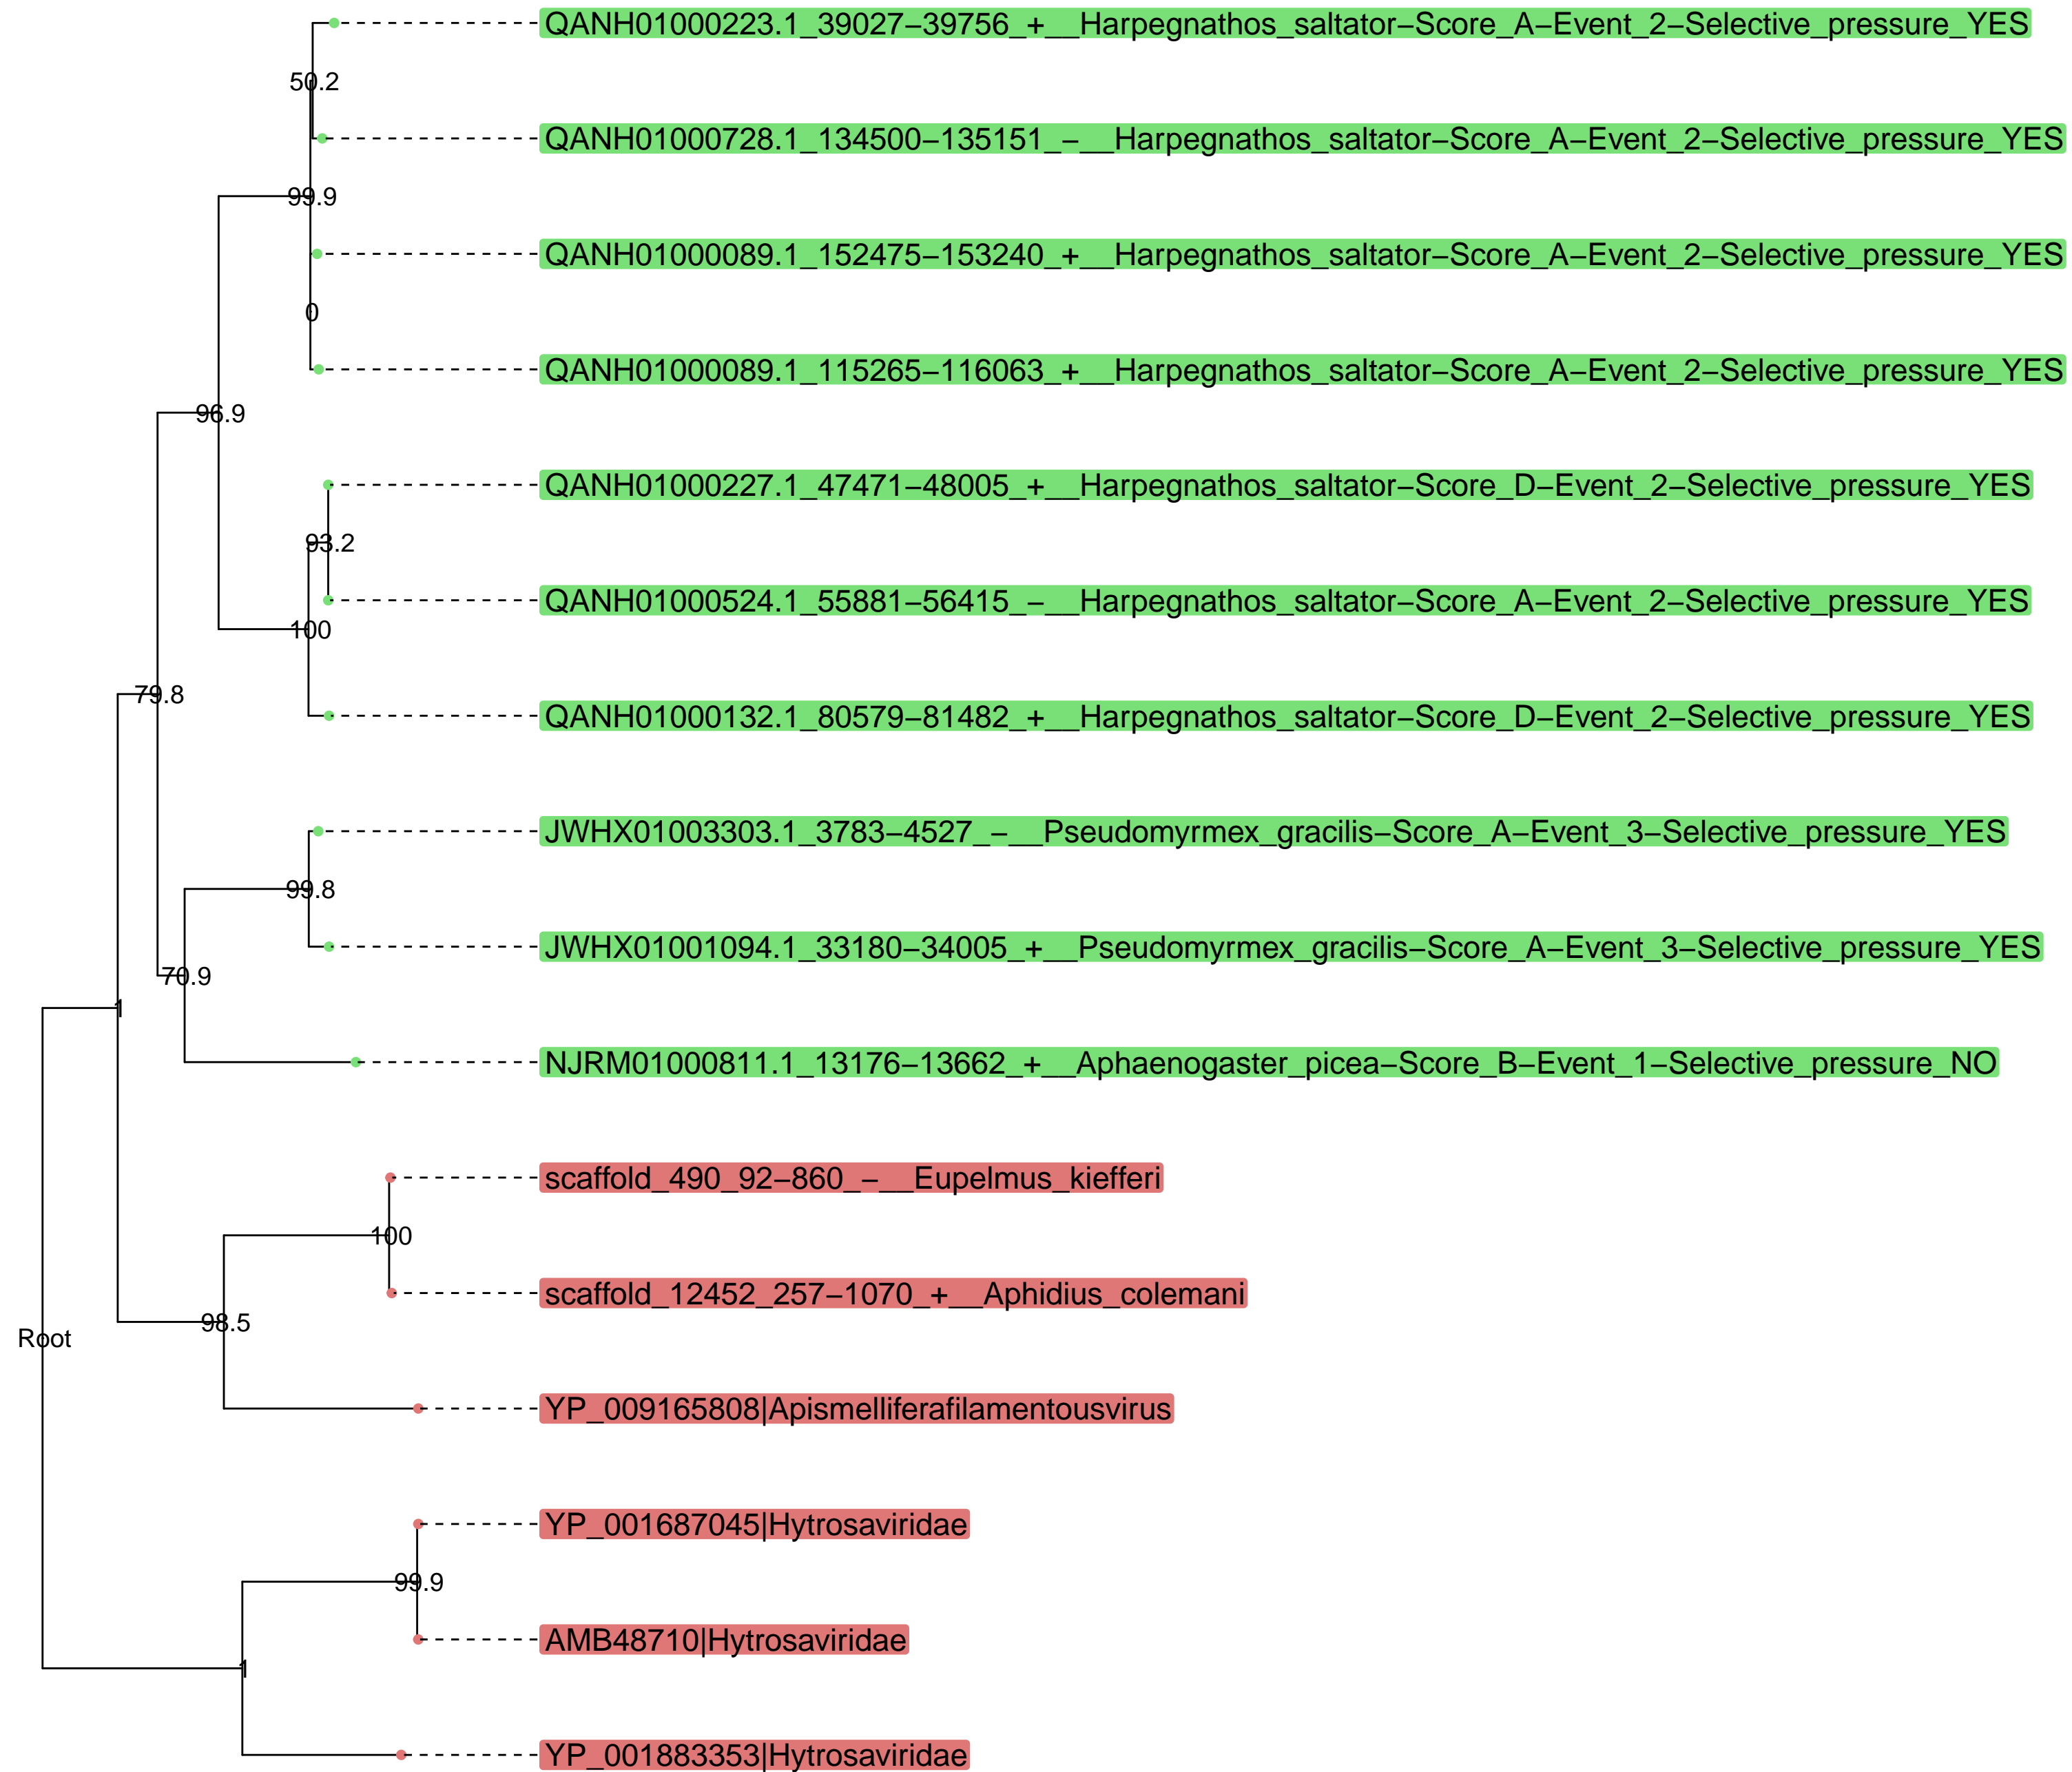

Cluster20941 – families involved : ['Apis\_filamentous-like'] – putative protein : ['Methyltransferase domain']

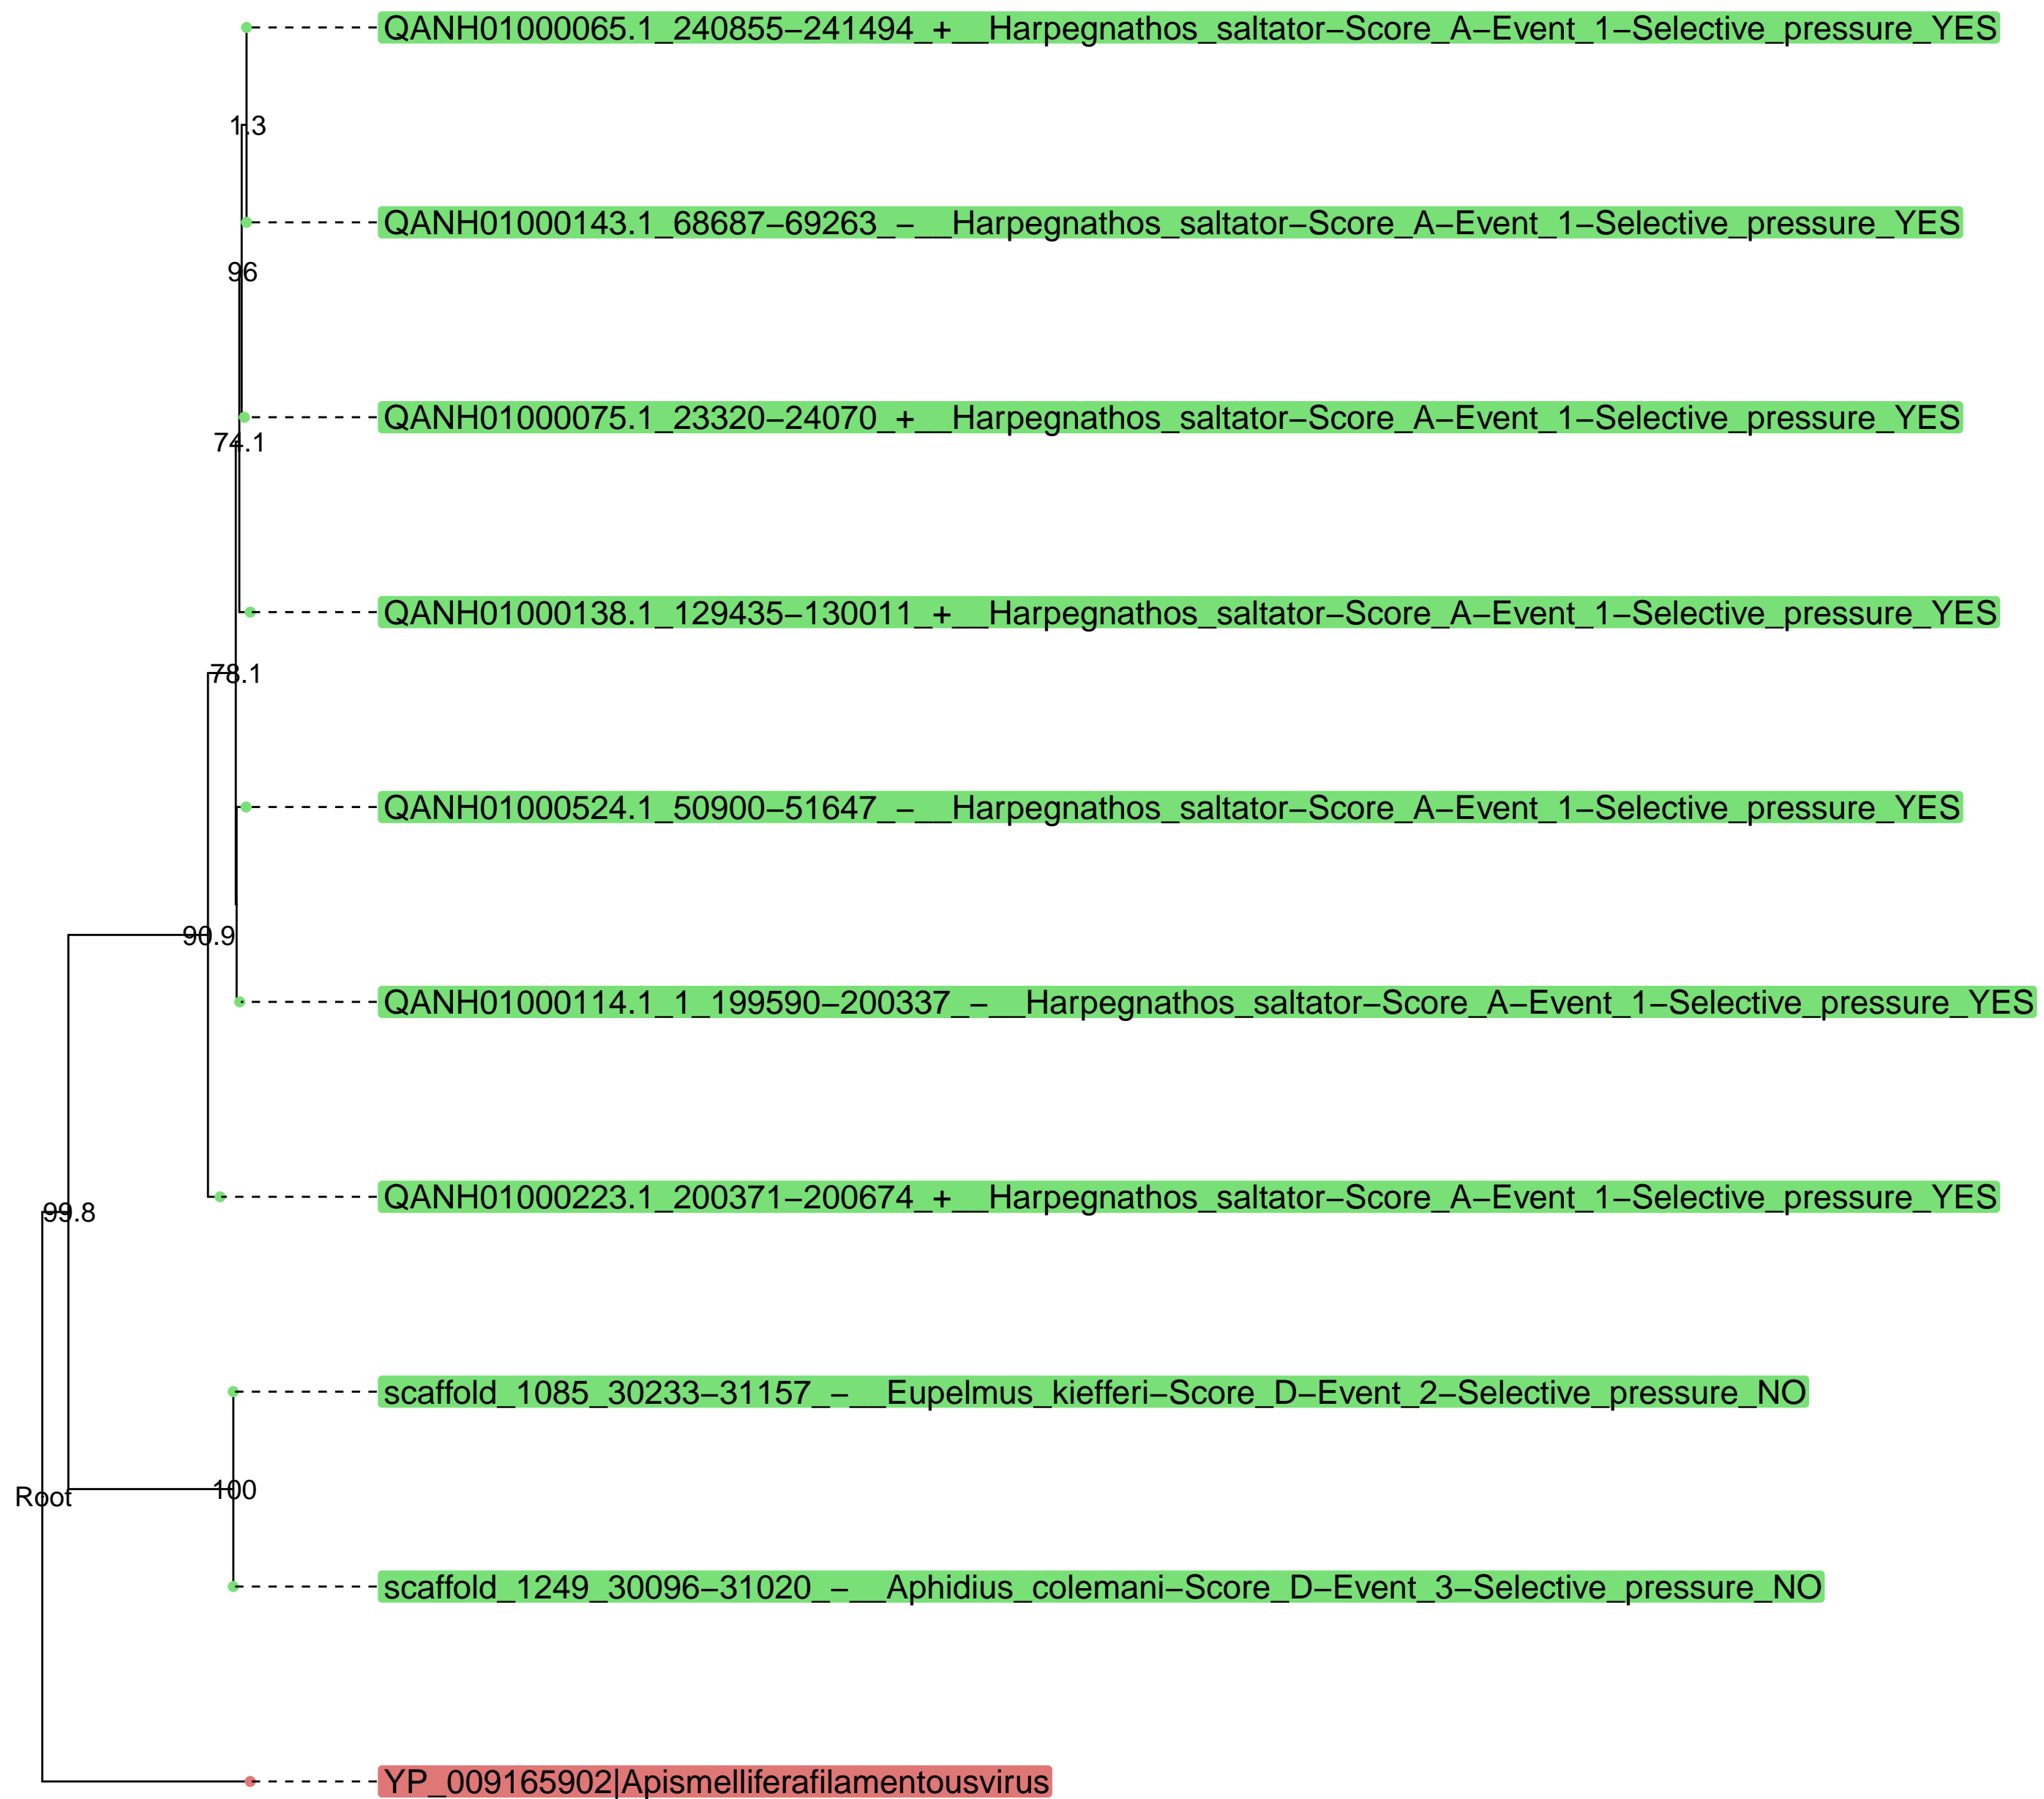

Cluster19349 – families involved : ['Apis\_filamentous-like'] – putative protein : ['RNA polymerase Rpb1, domain 2']

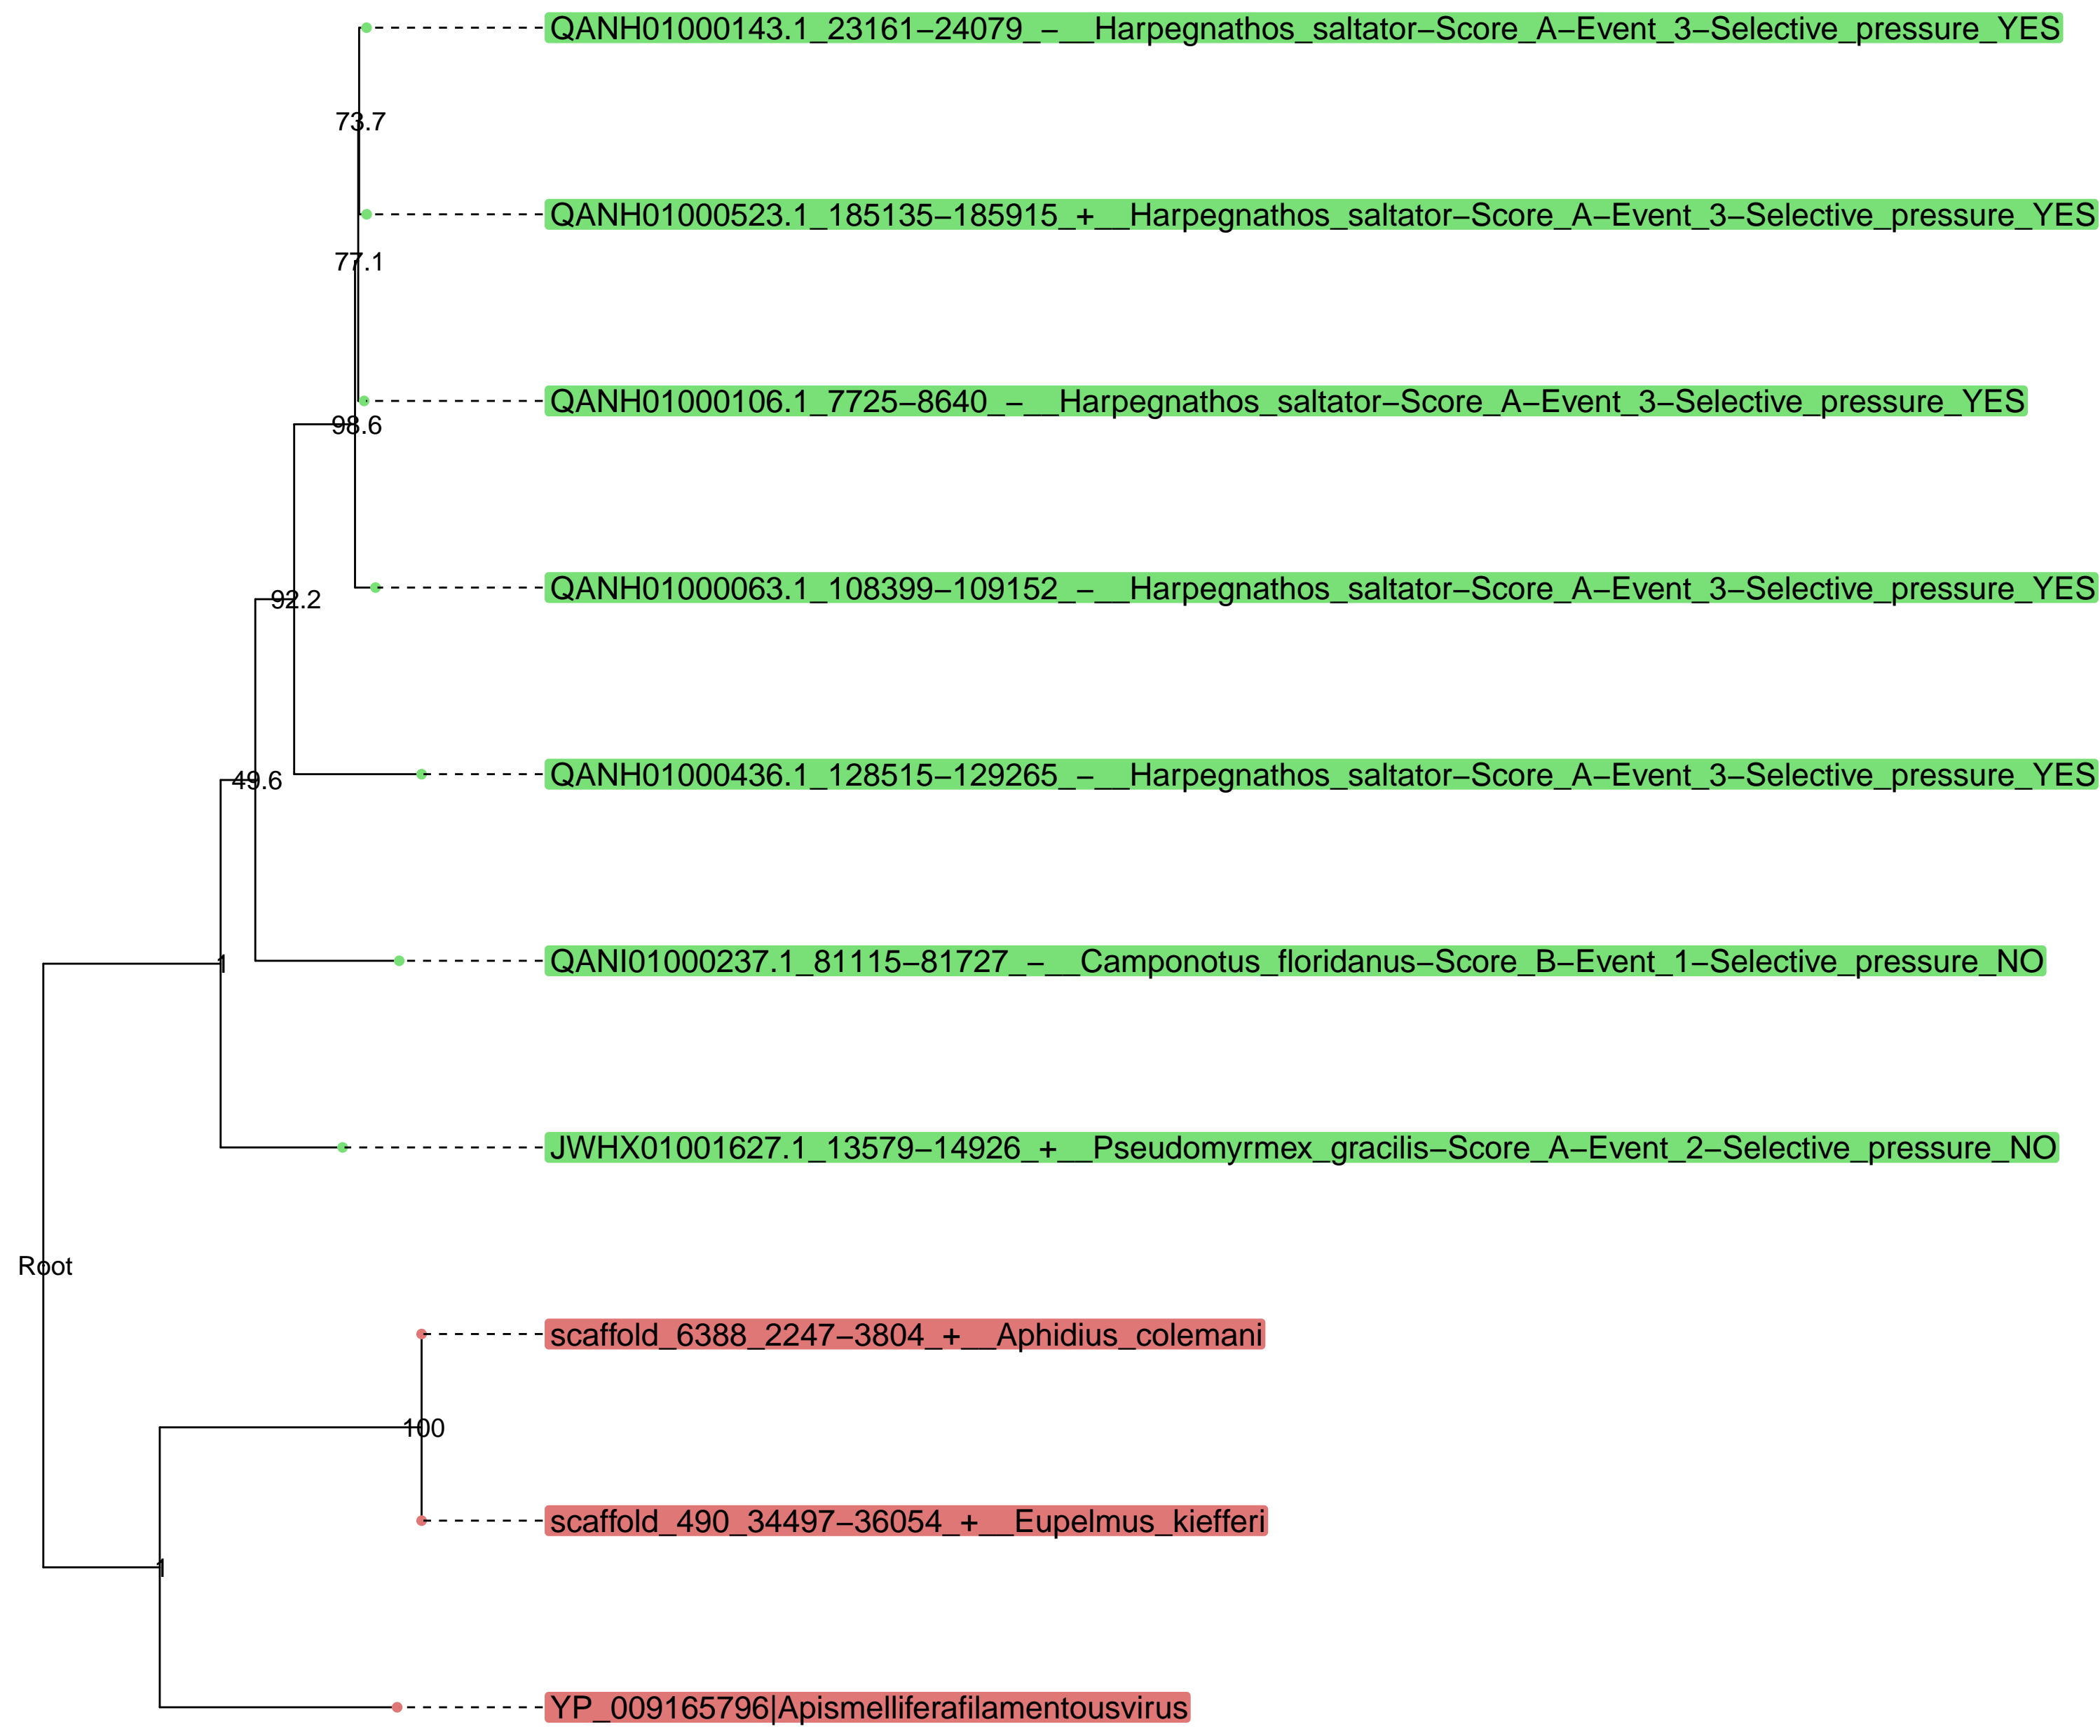

Cluster18348 – families involved : ['Apis\_filamentous-like'] – putative protein : ['ATP-dependent zinc metalloprotease']

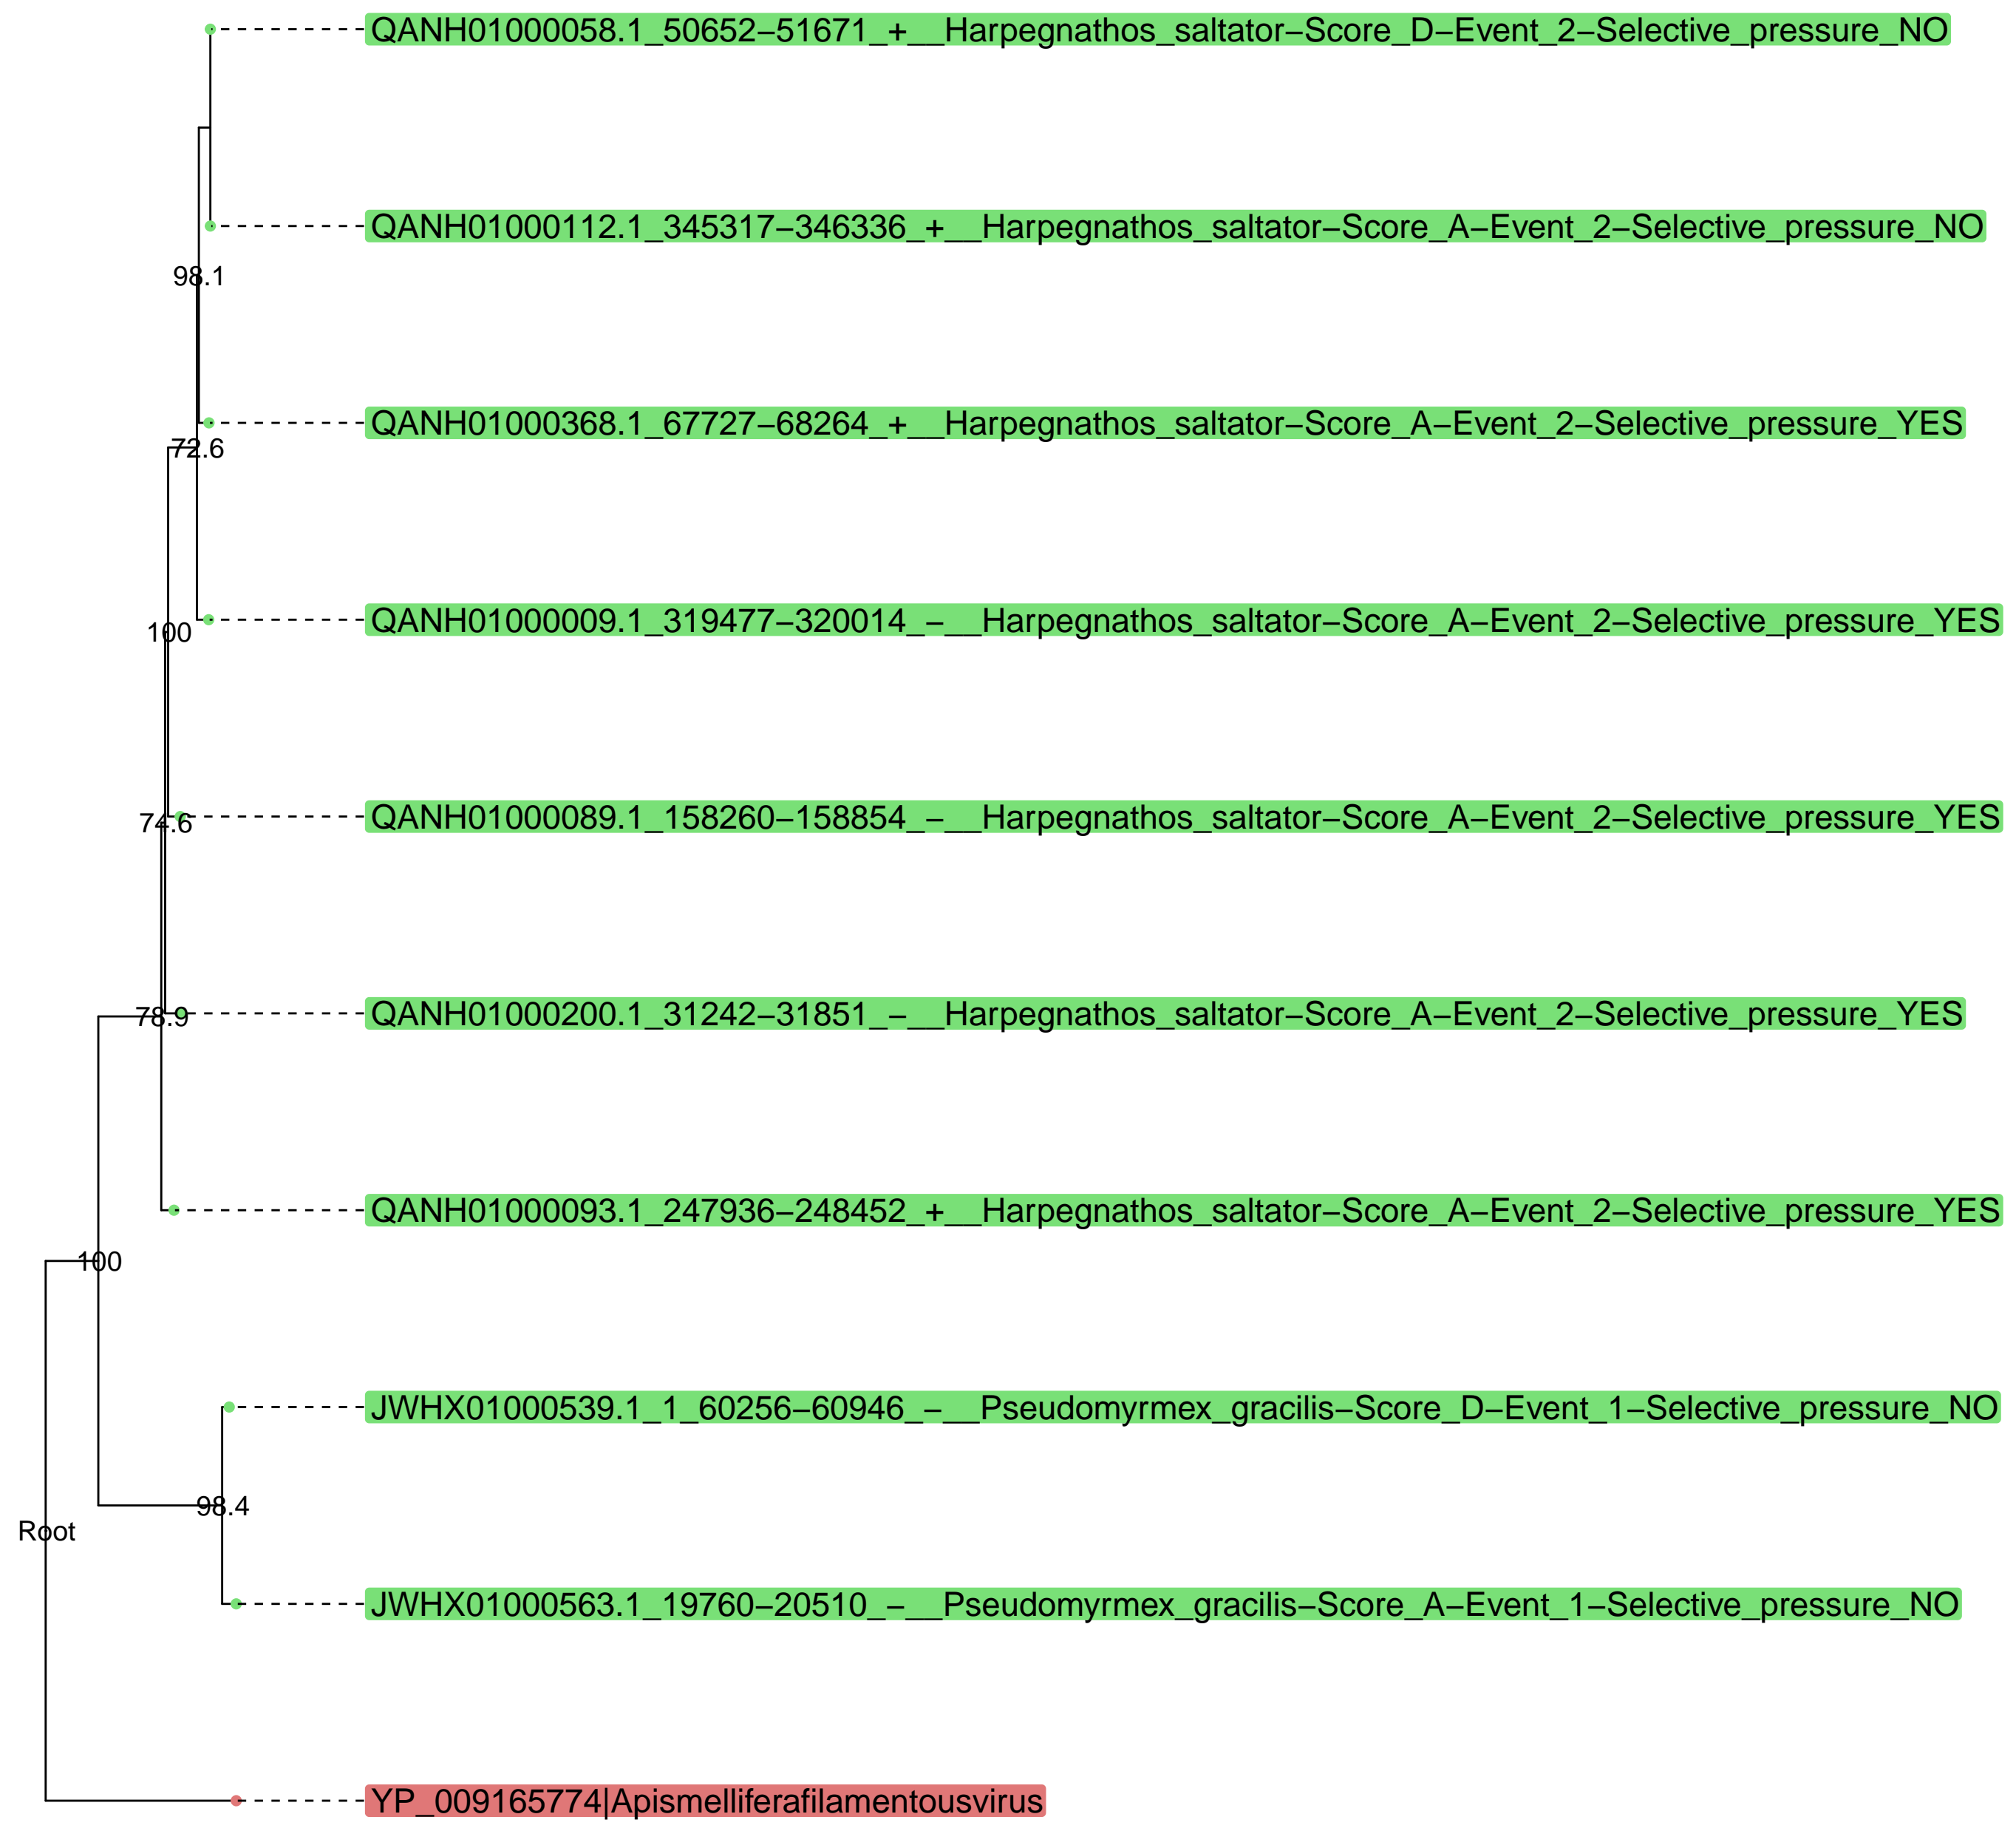



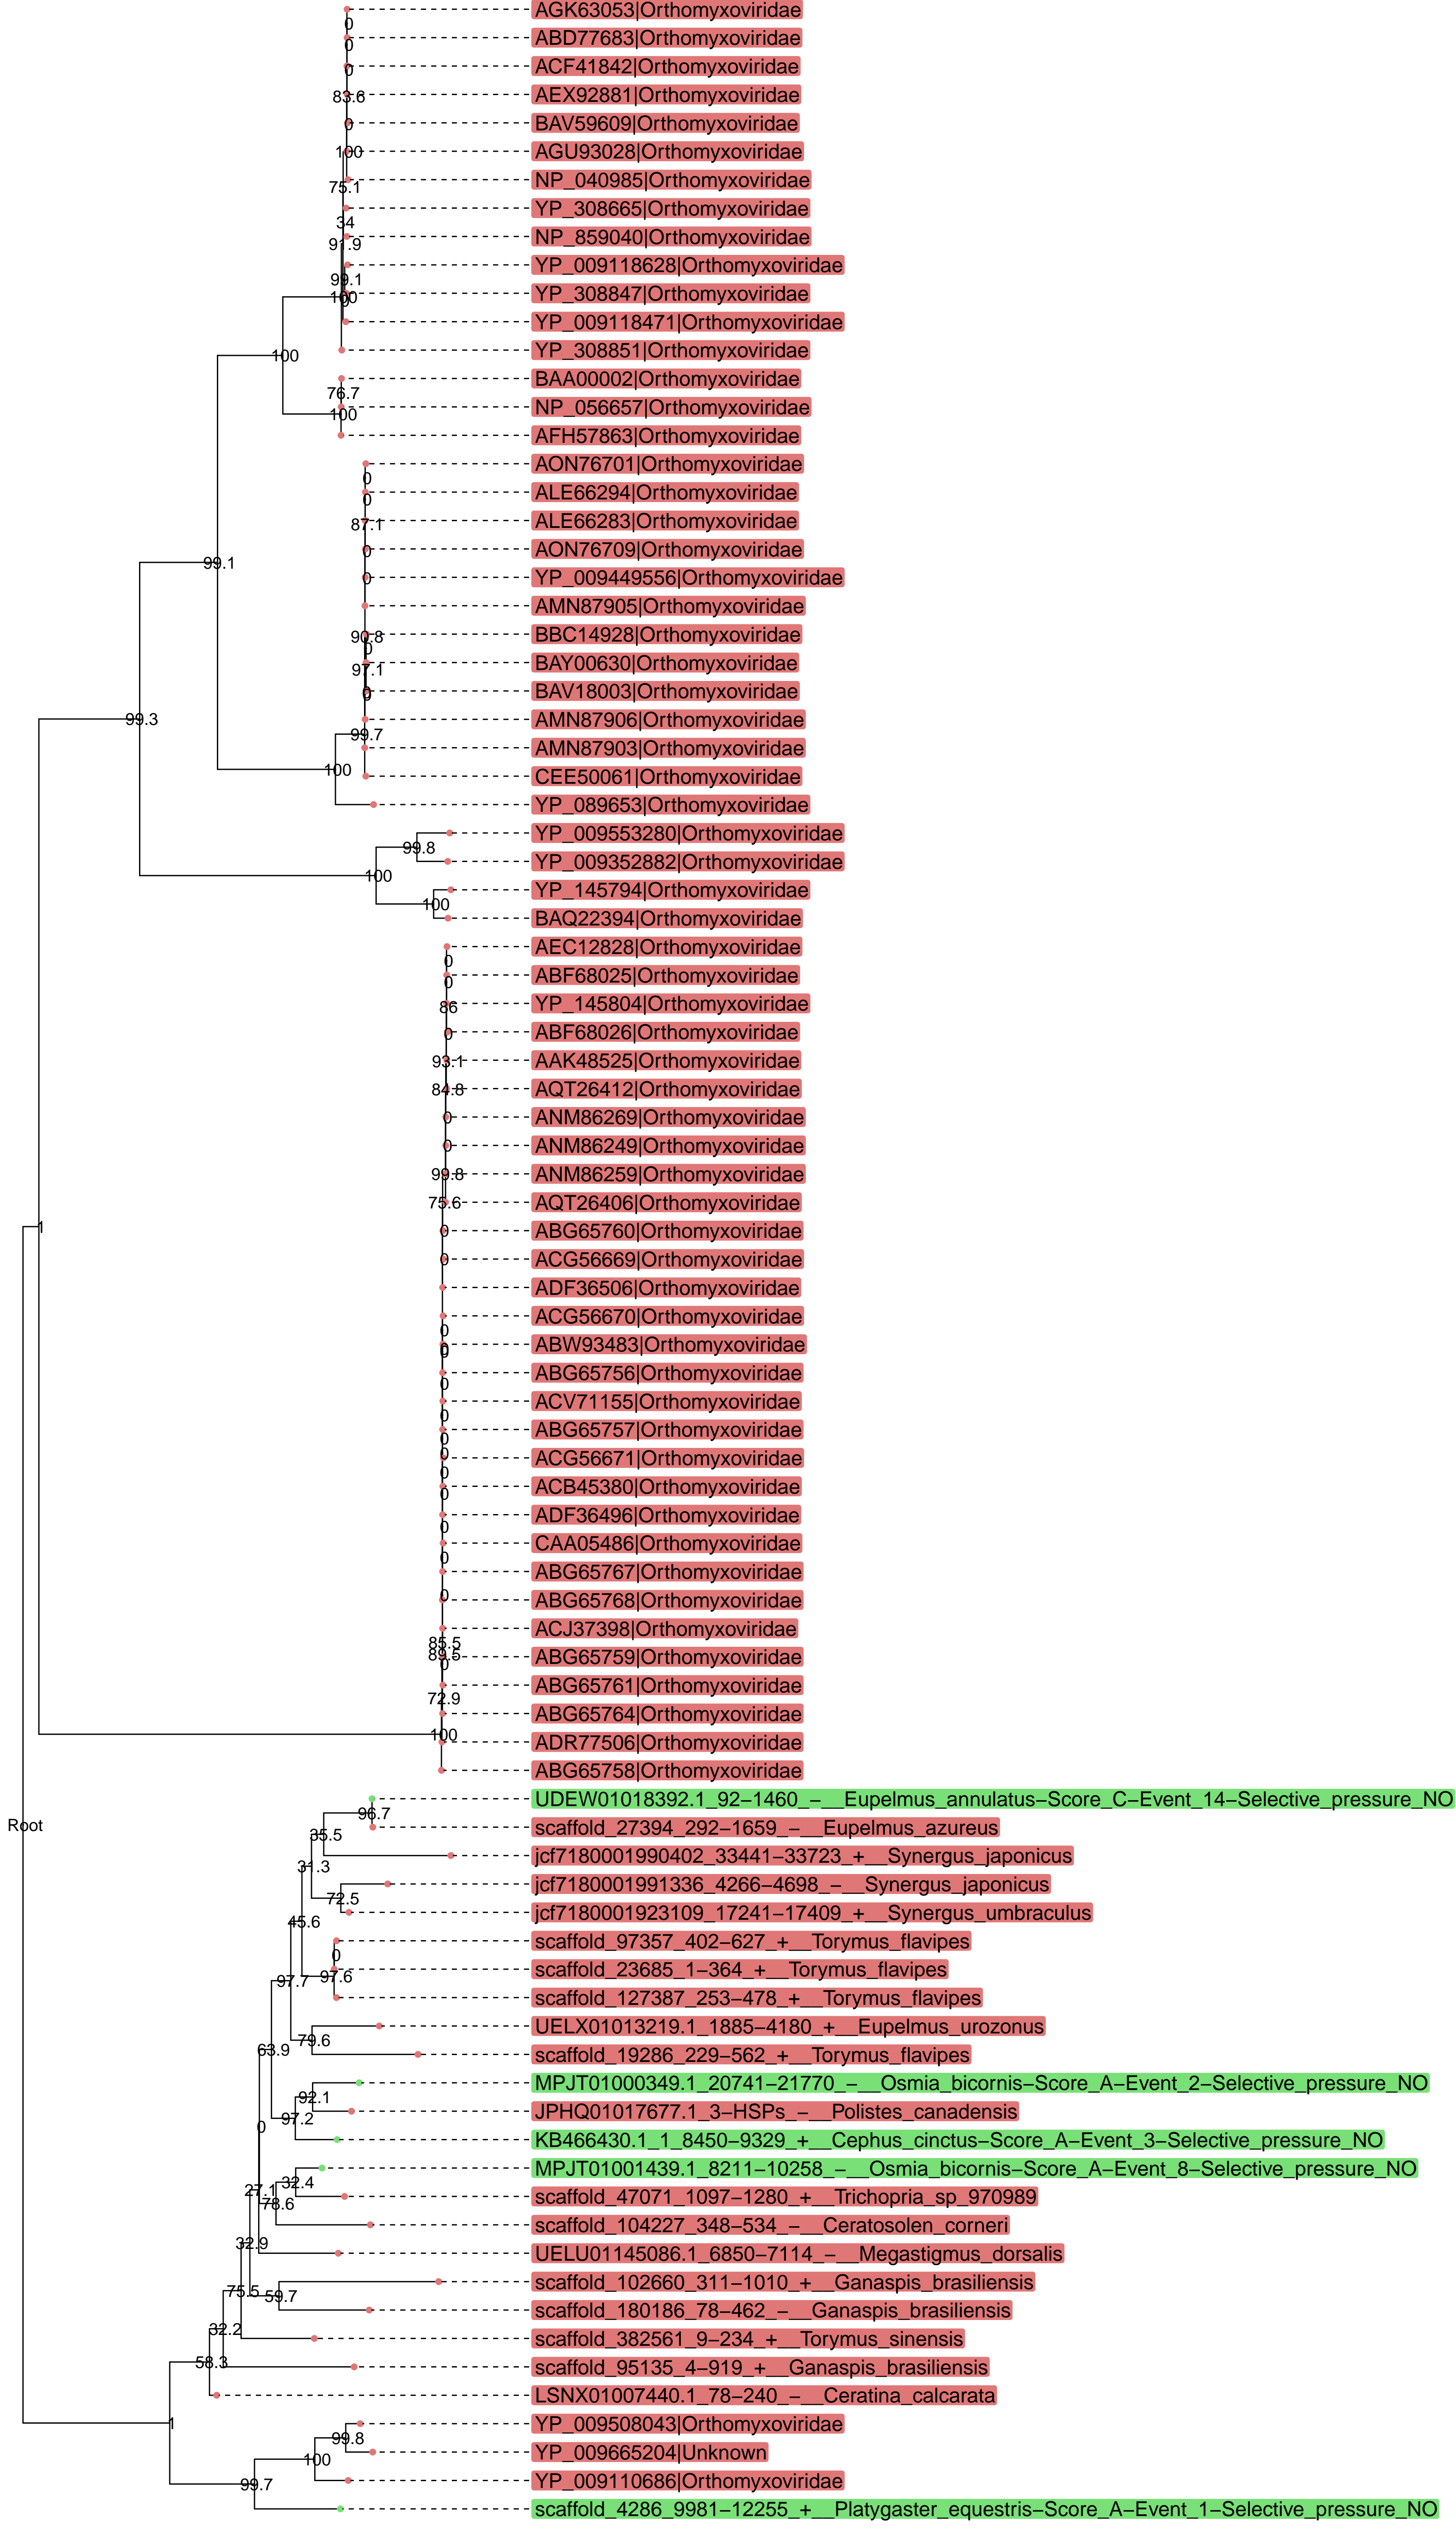

Cluster26257 – families involved : ['Poxviridae'] – putative protein : ['AAA domain']

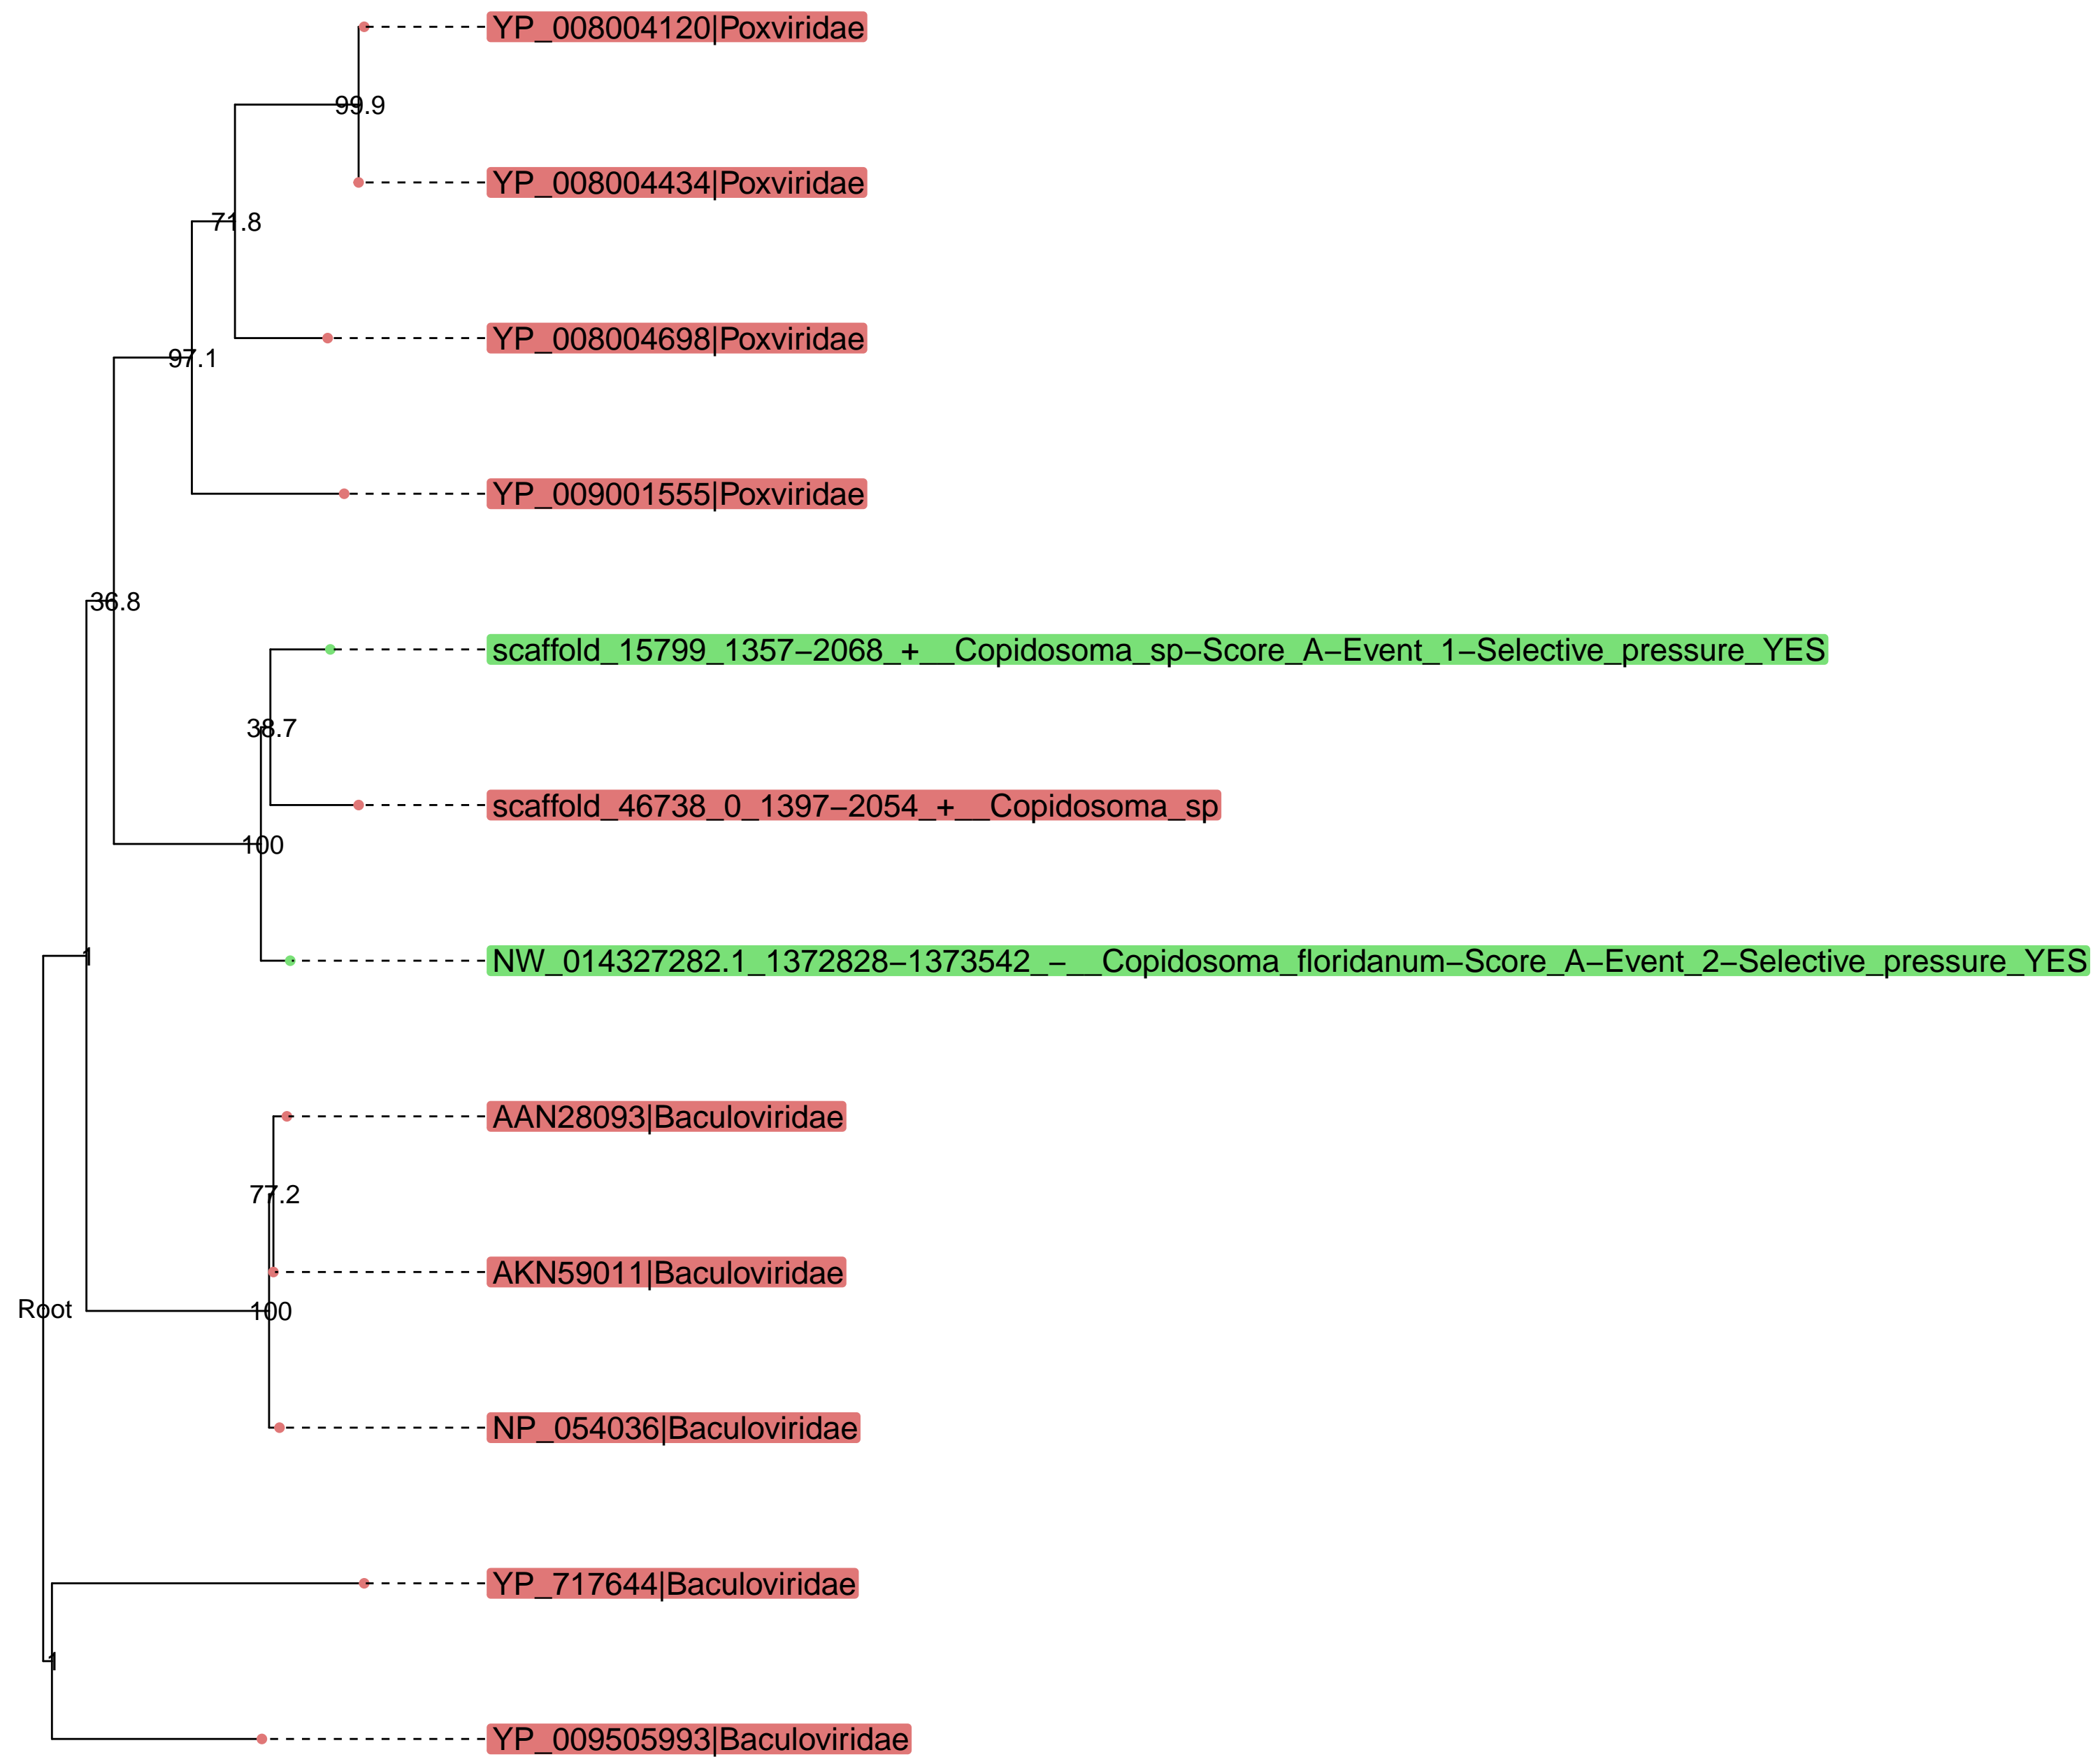

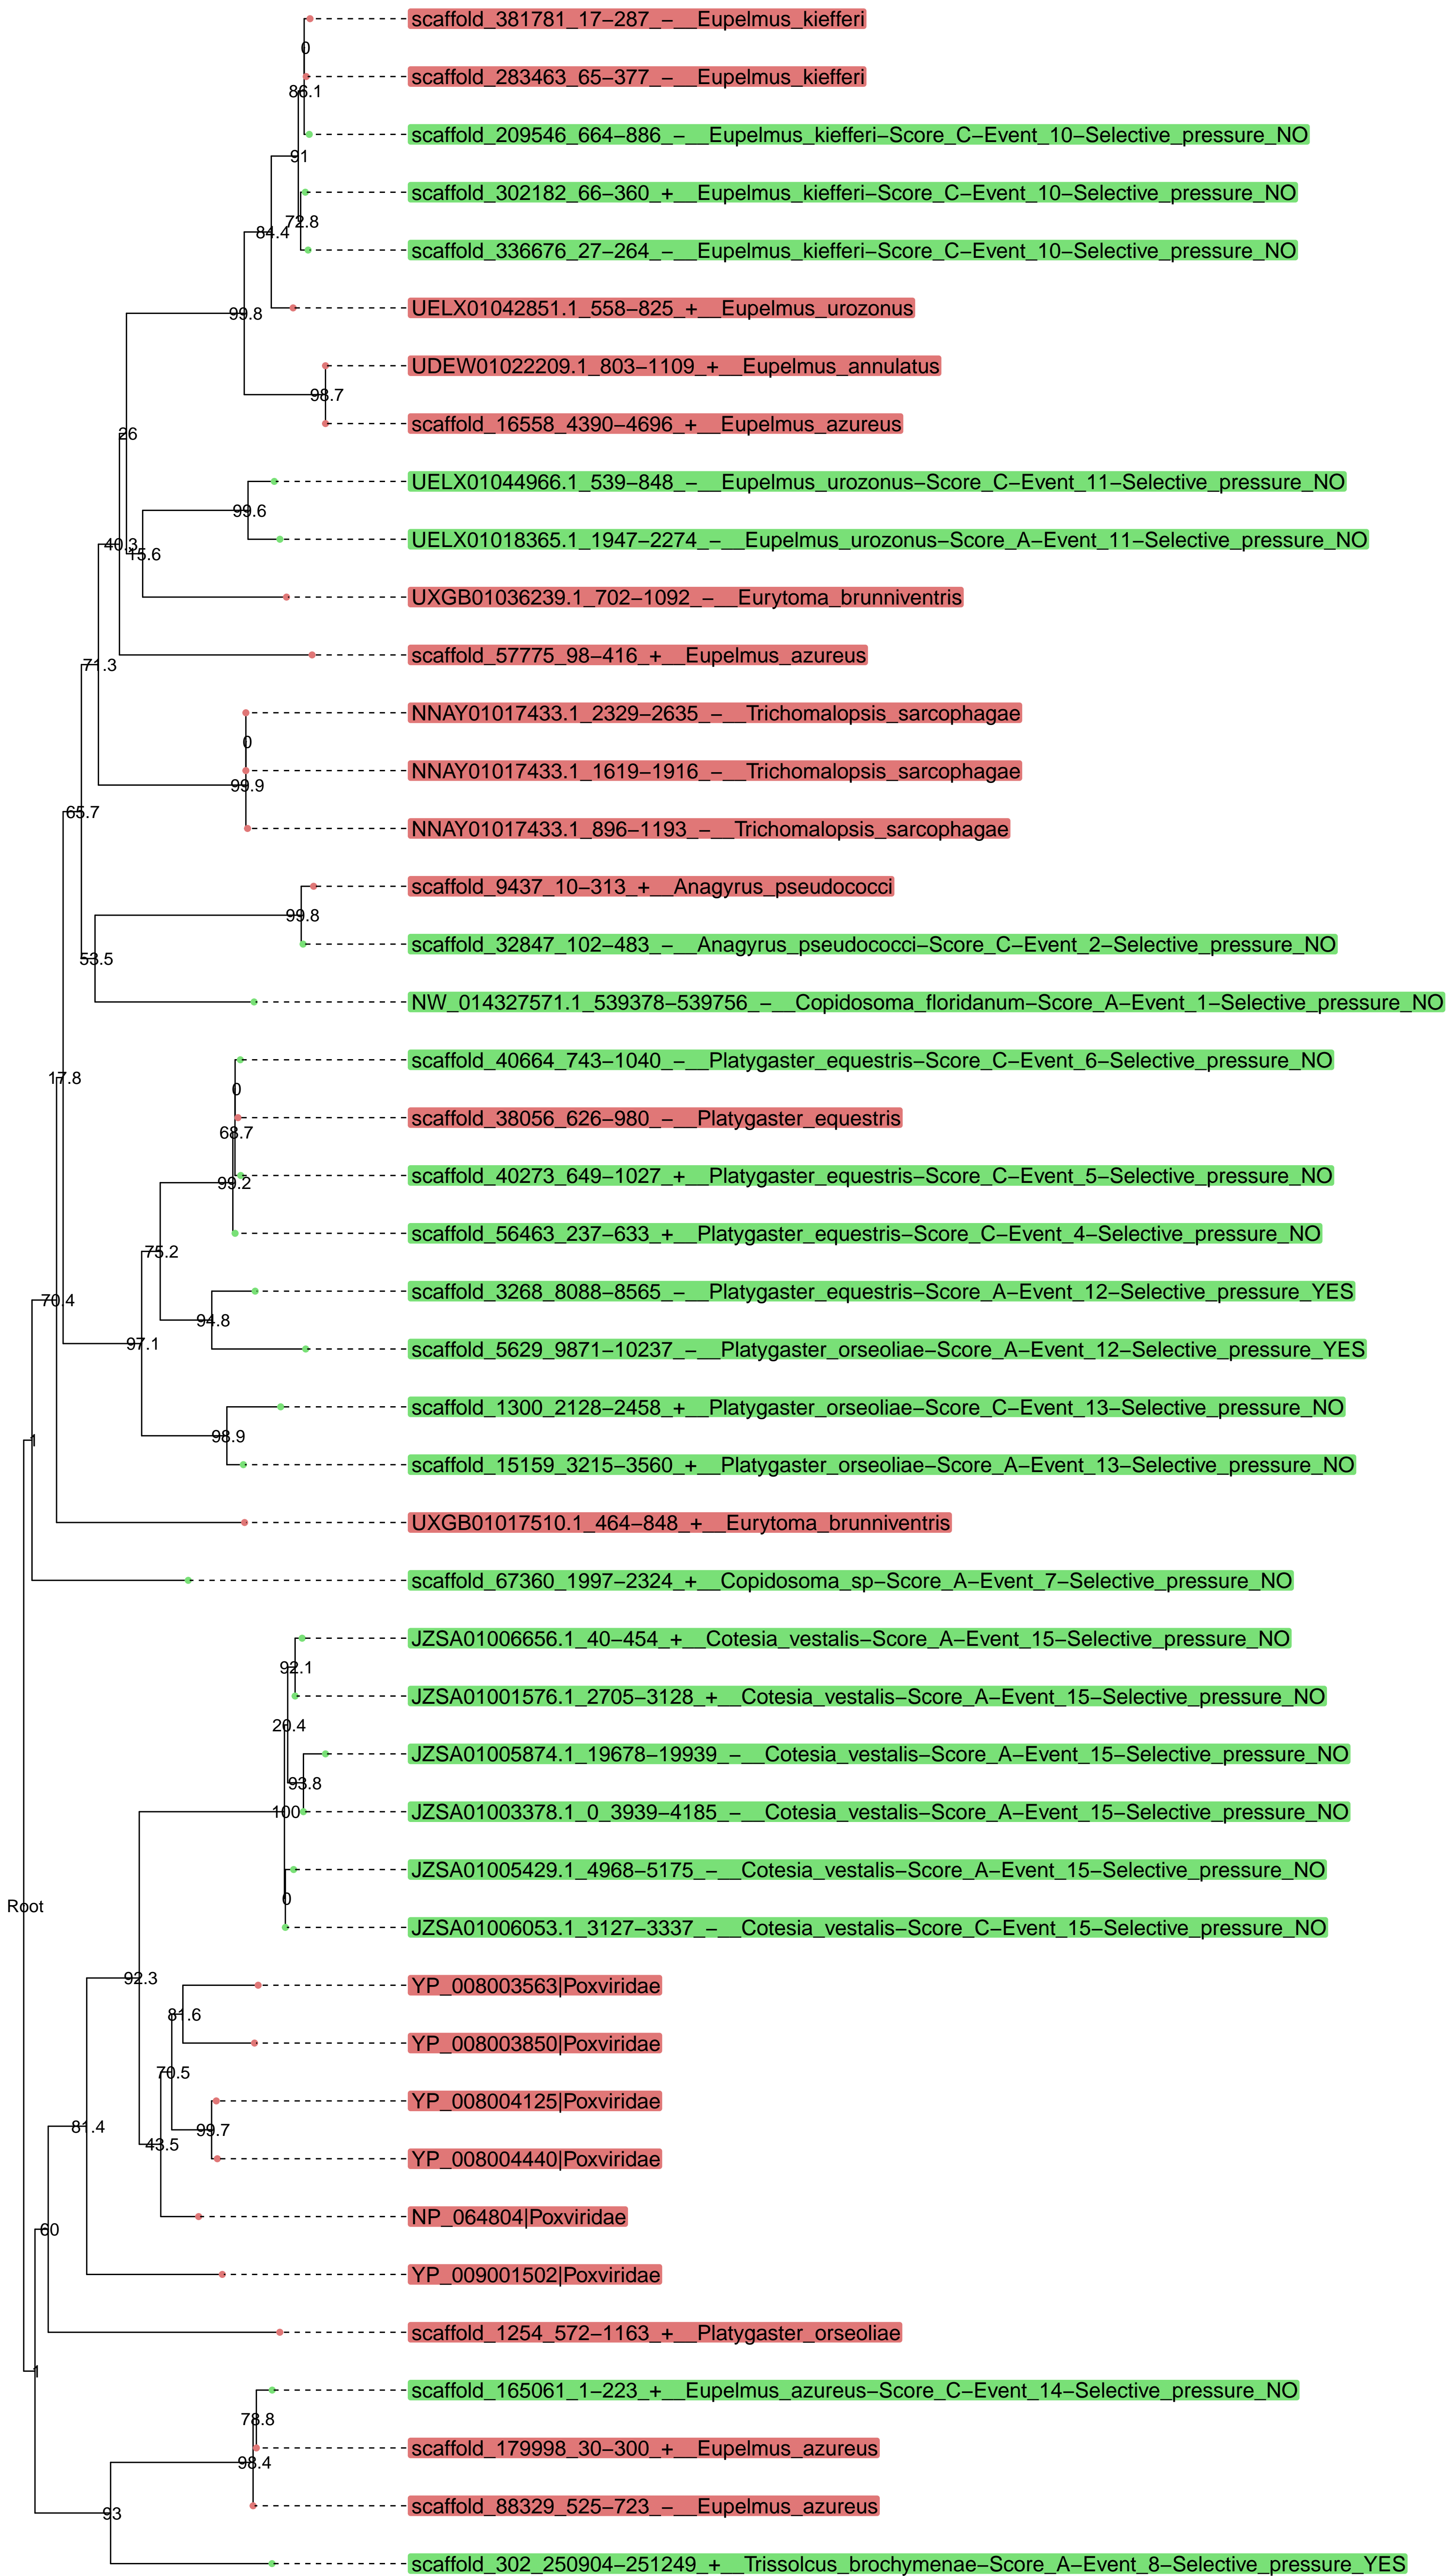

Cluster1757 – families involved : ['Unknown'] – putative protein : ['NS5-like protein']

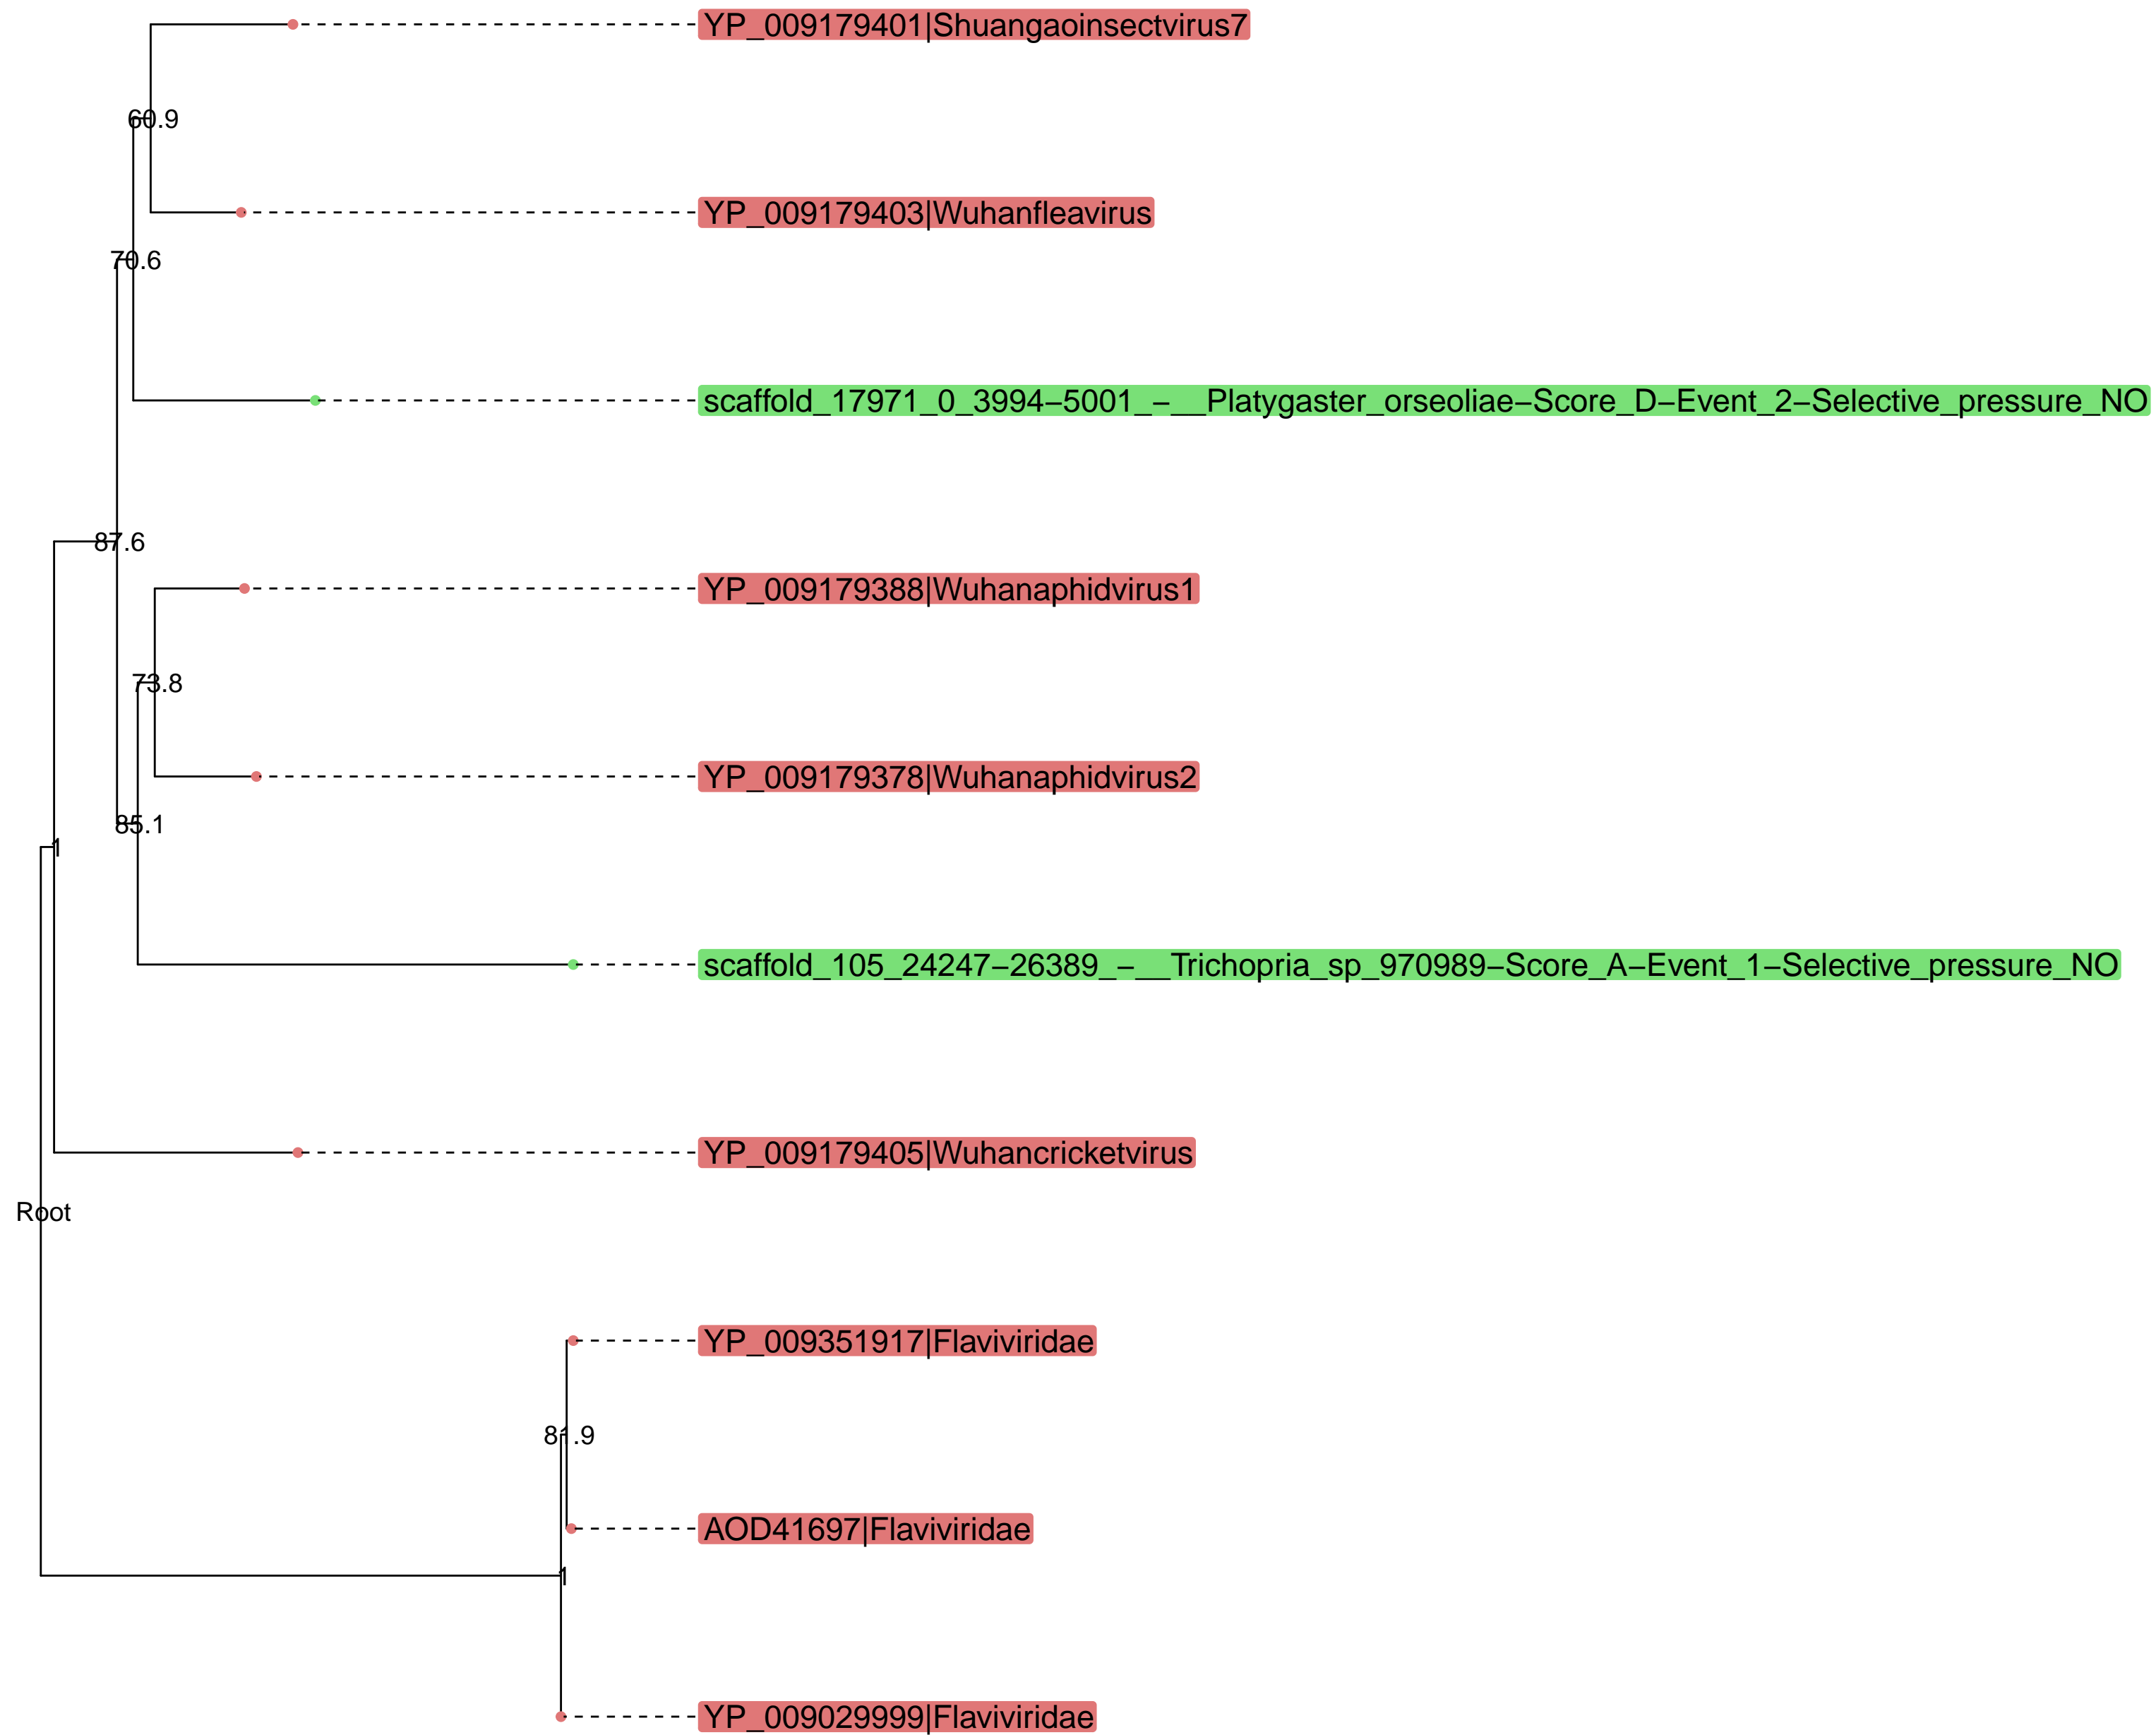

Cluster17557 – families involved : ['Iridoviridae'] – putative protein : ['Uncharacterized protein']

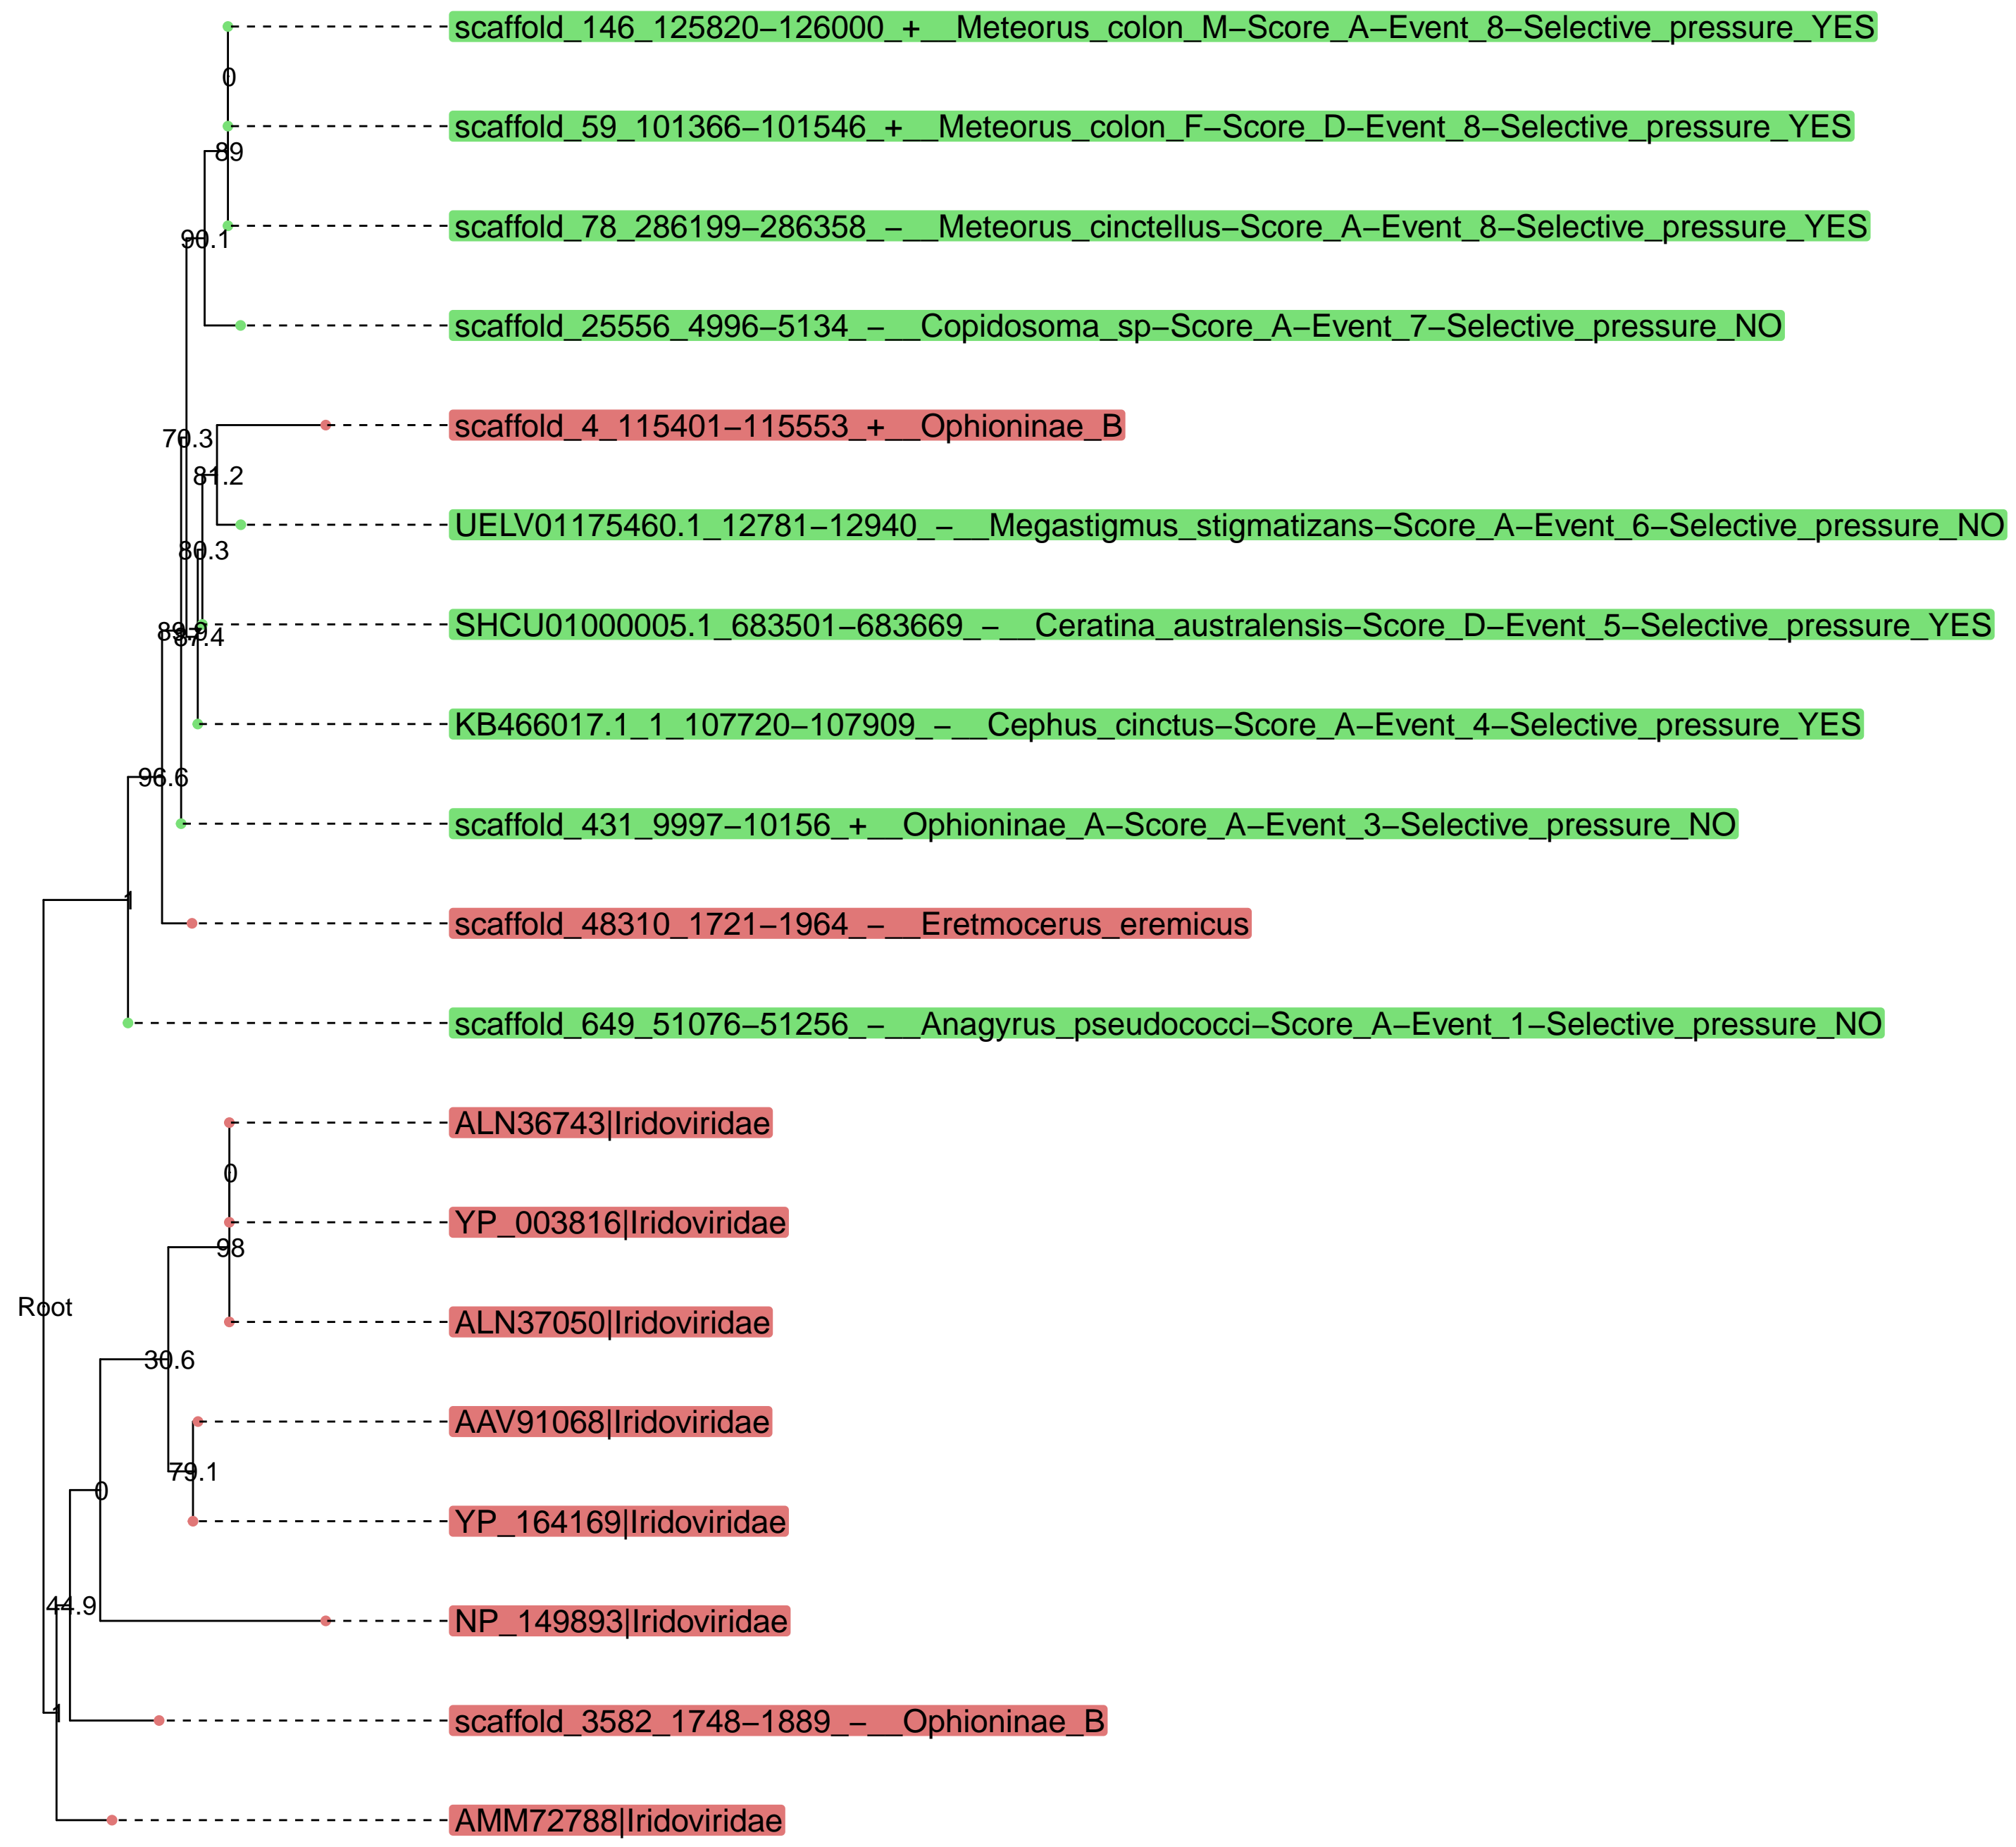

Cluster22895 – families involved : ['Phycodnaviridae'] – putative protein : ['Uncharacterized protein m550L']

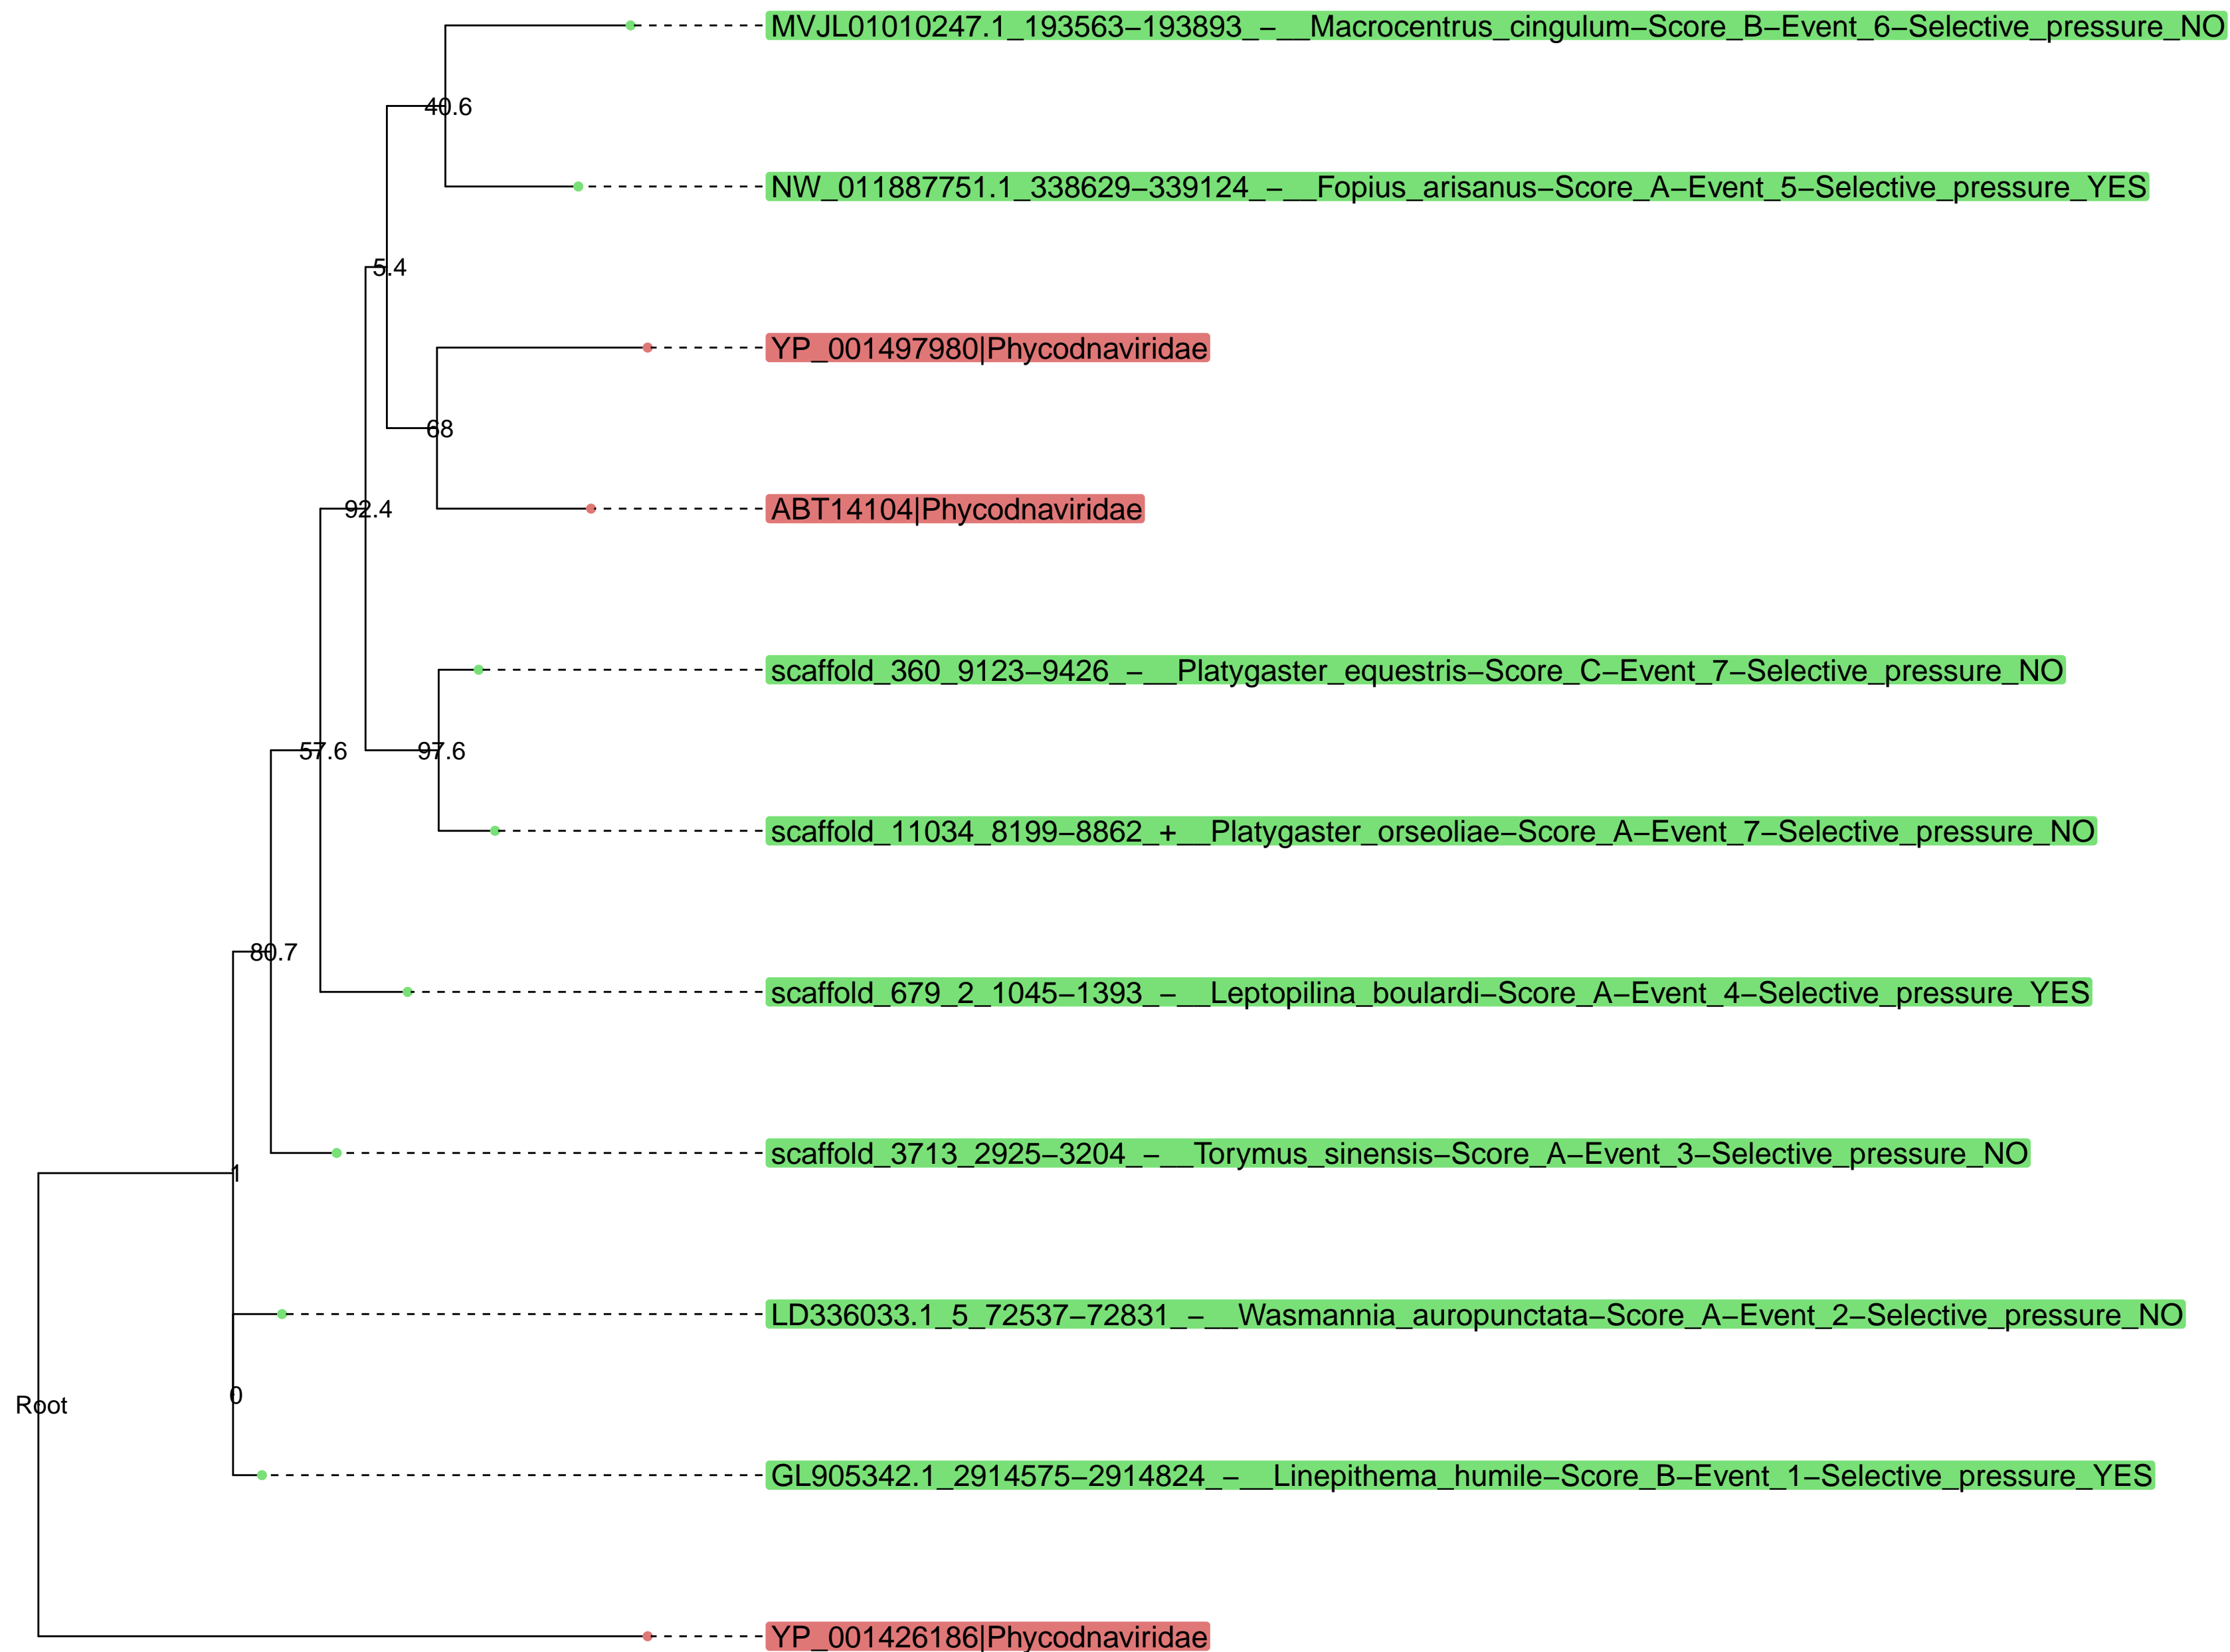

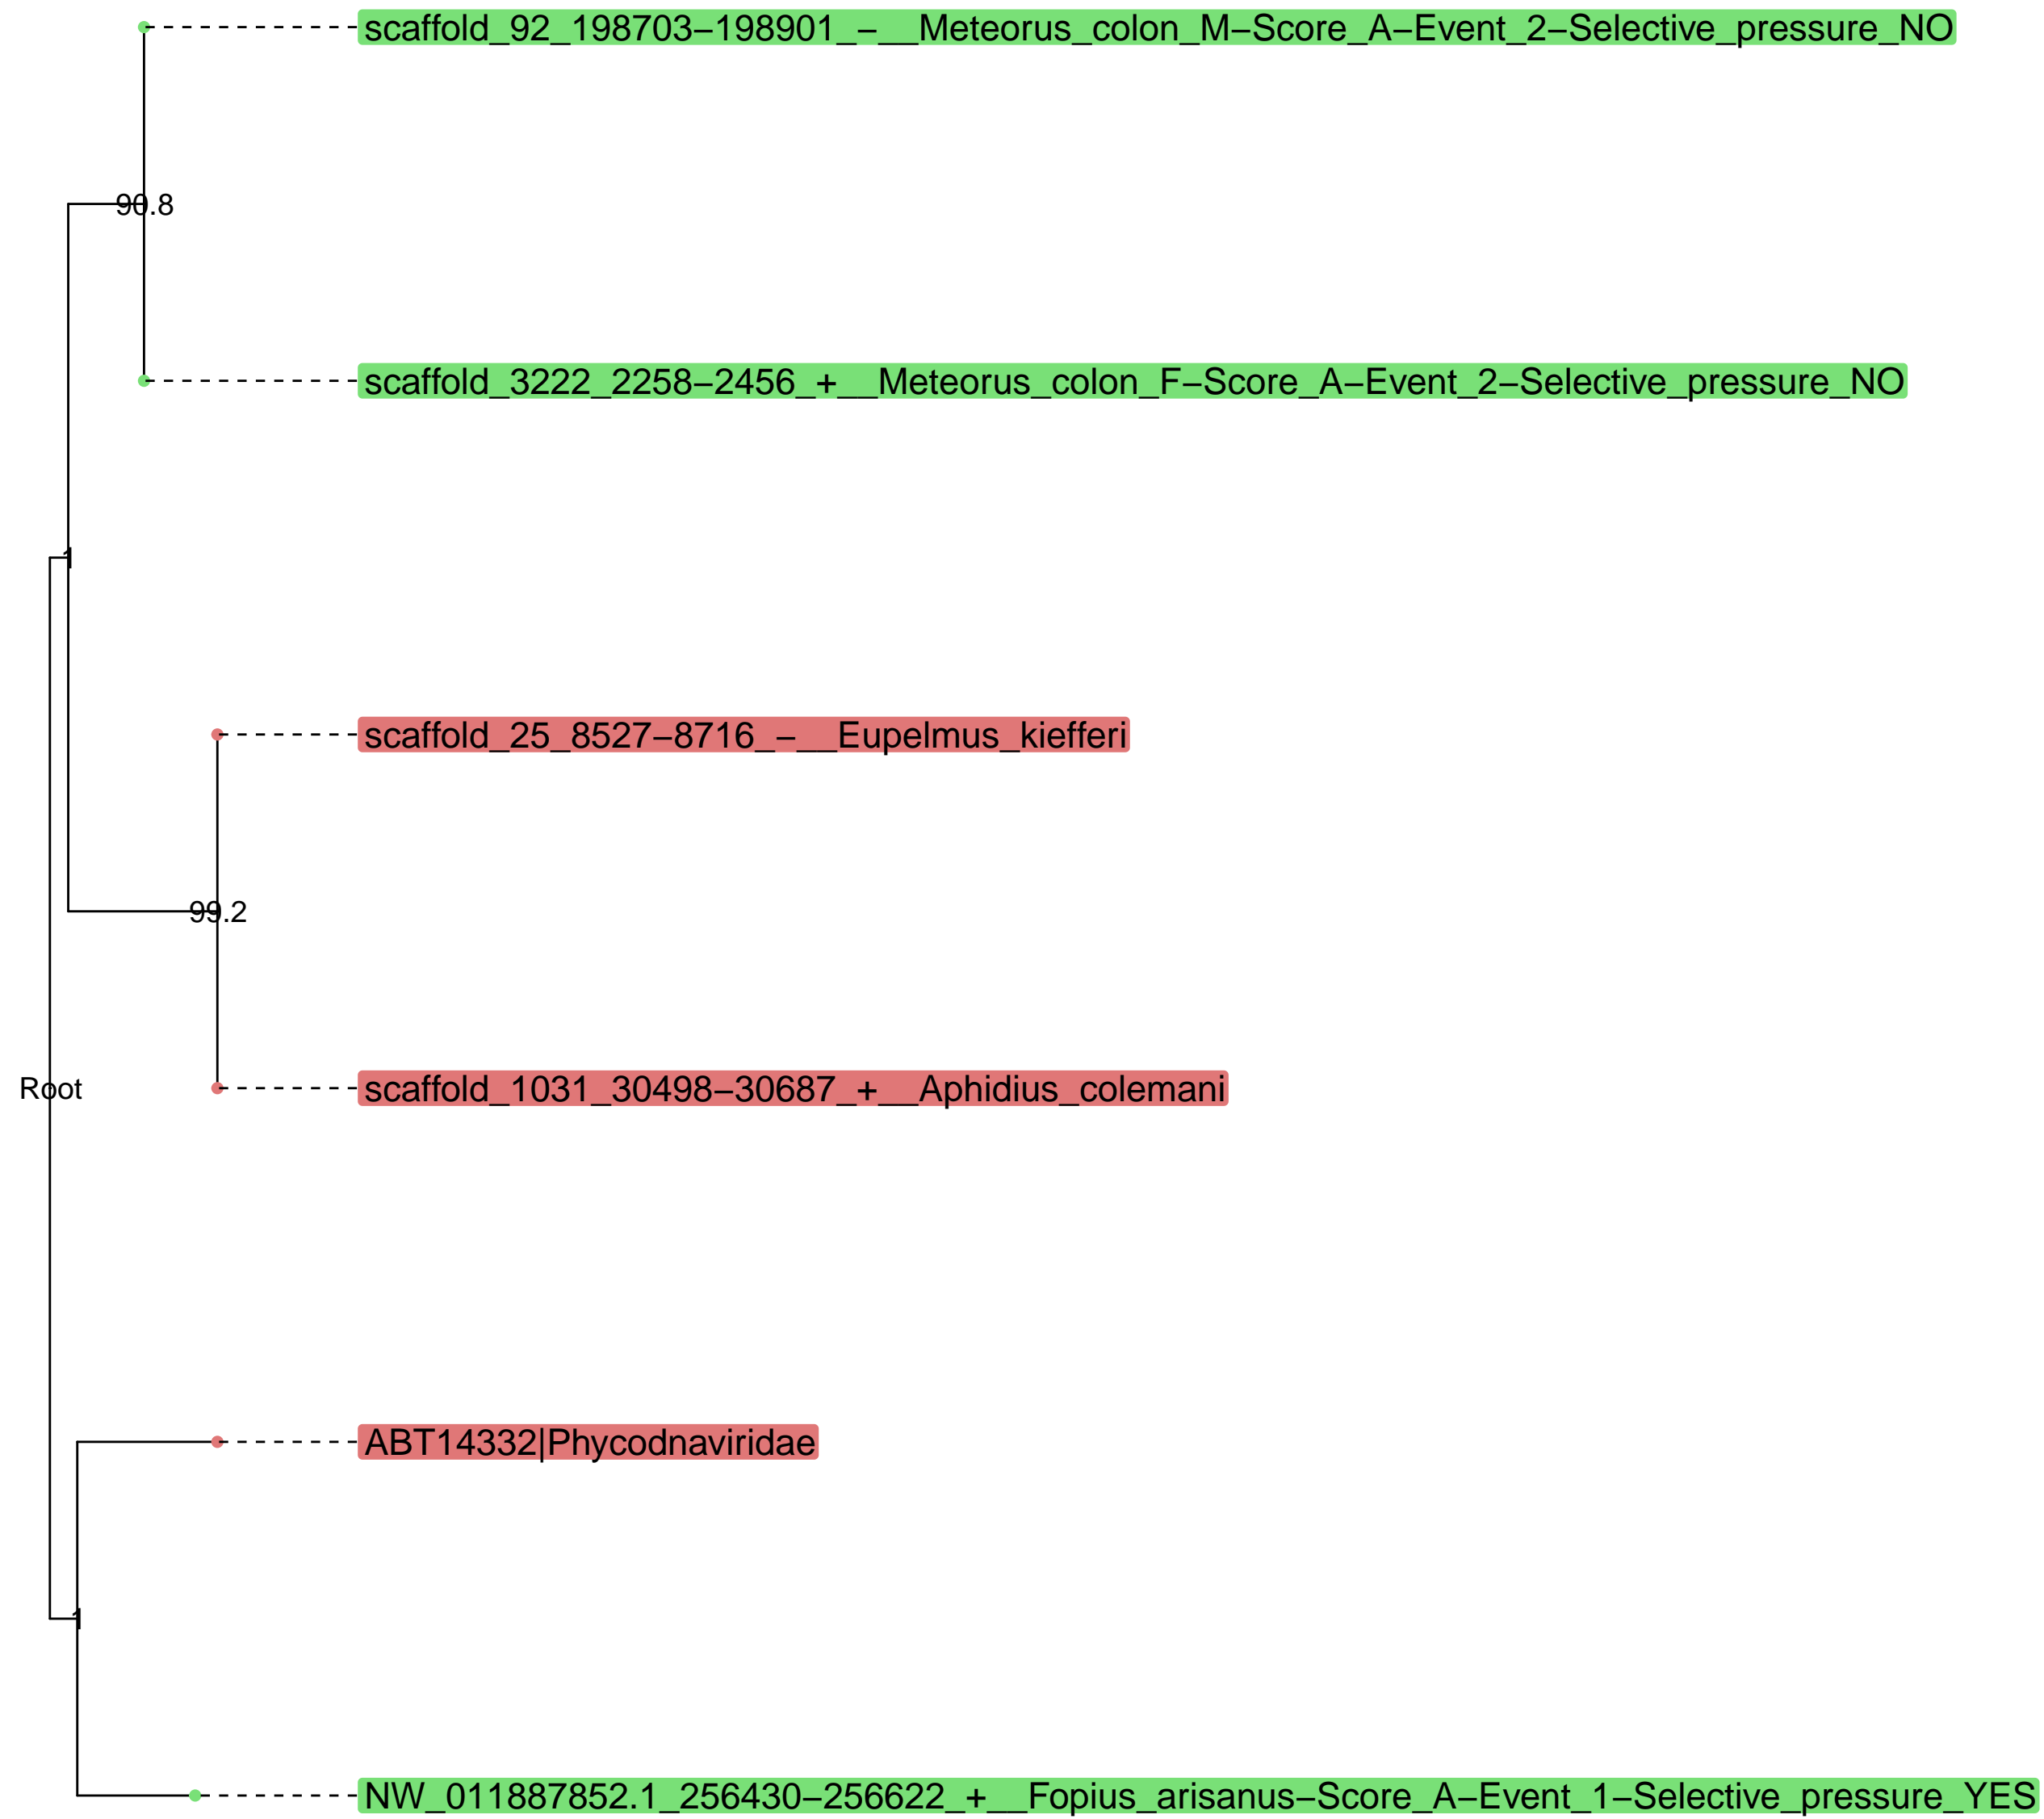

Cluster25892 – families involved : ['Orthomyxoviridae'] – putative protein : ['Polymerase P3']

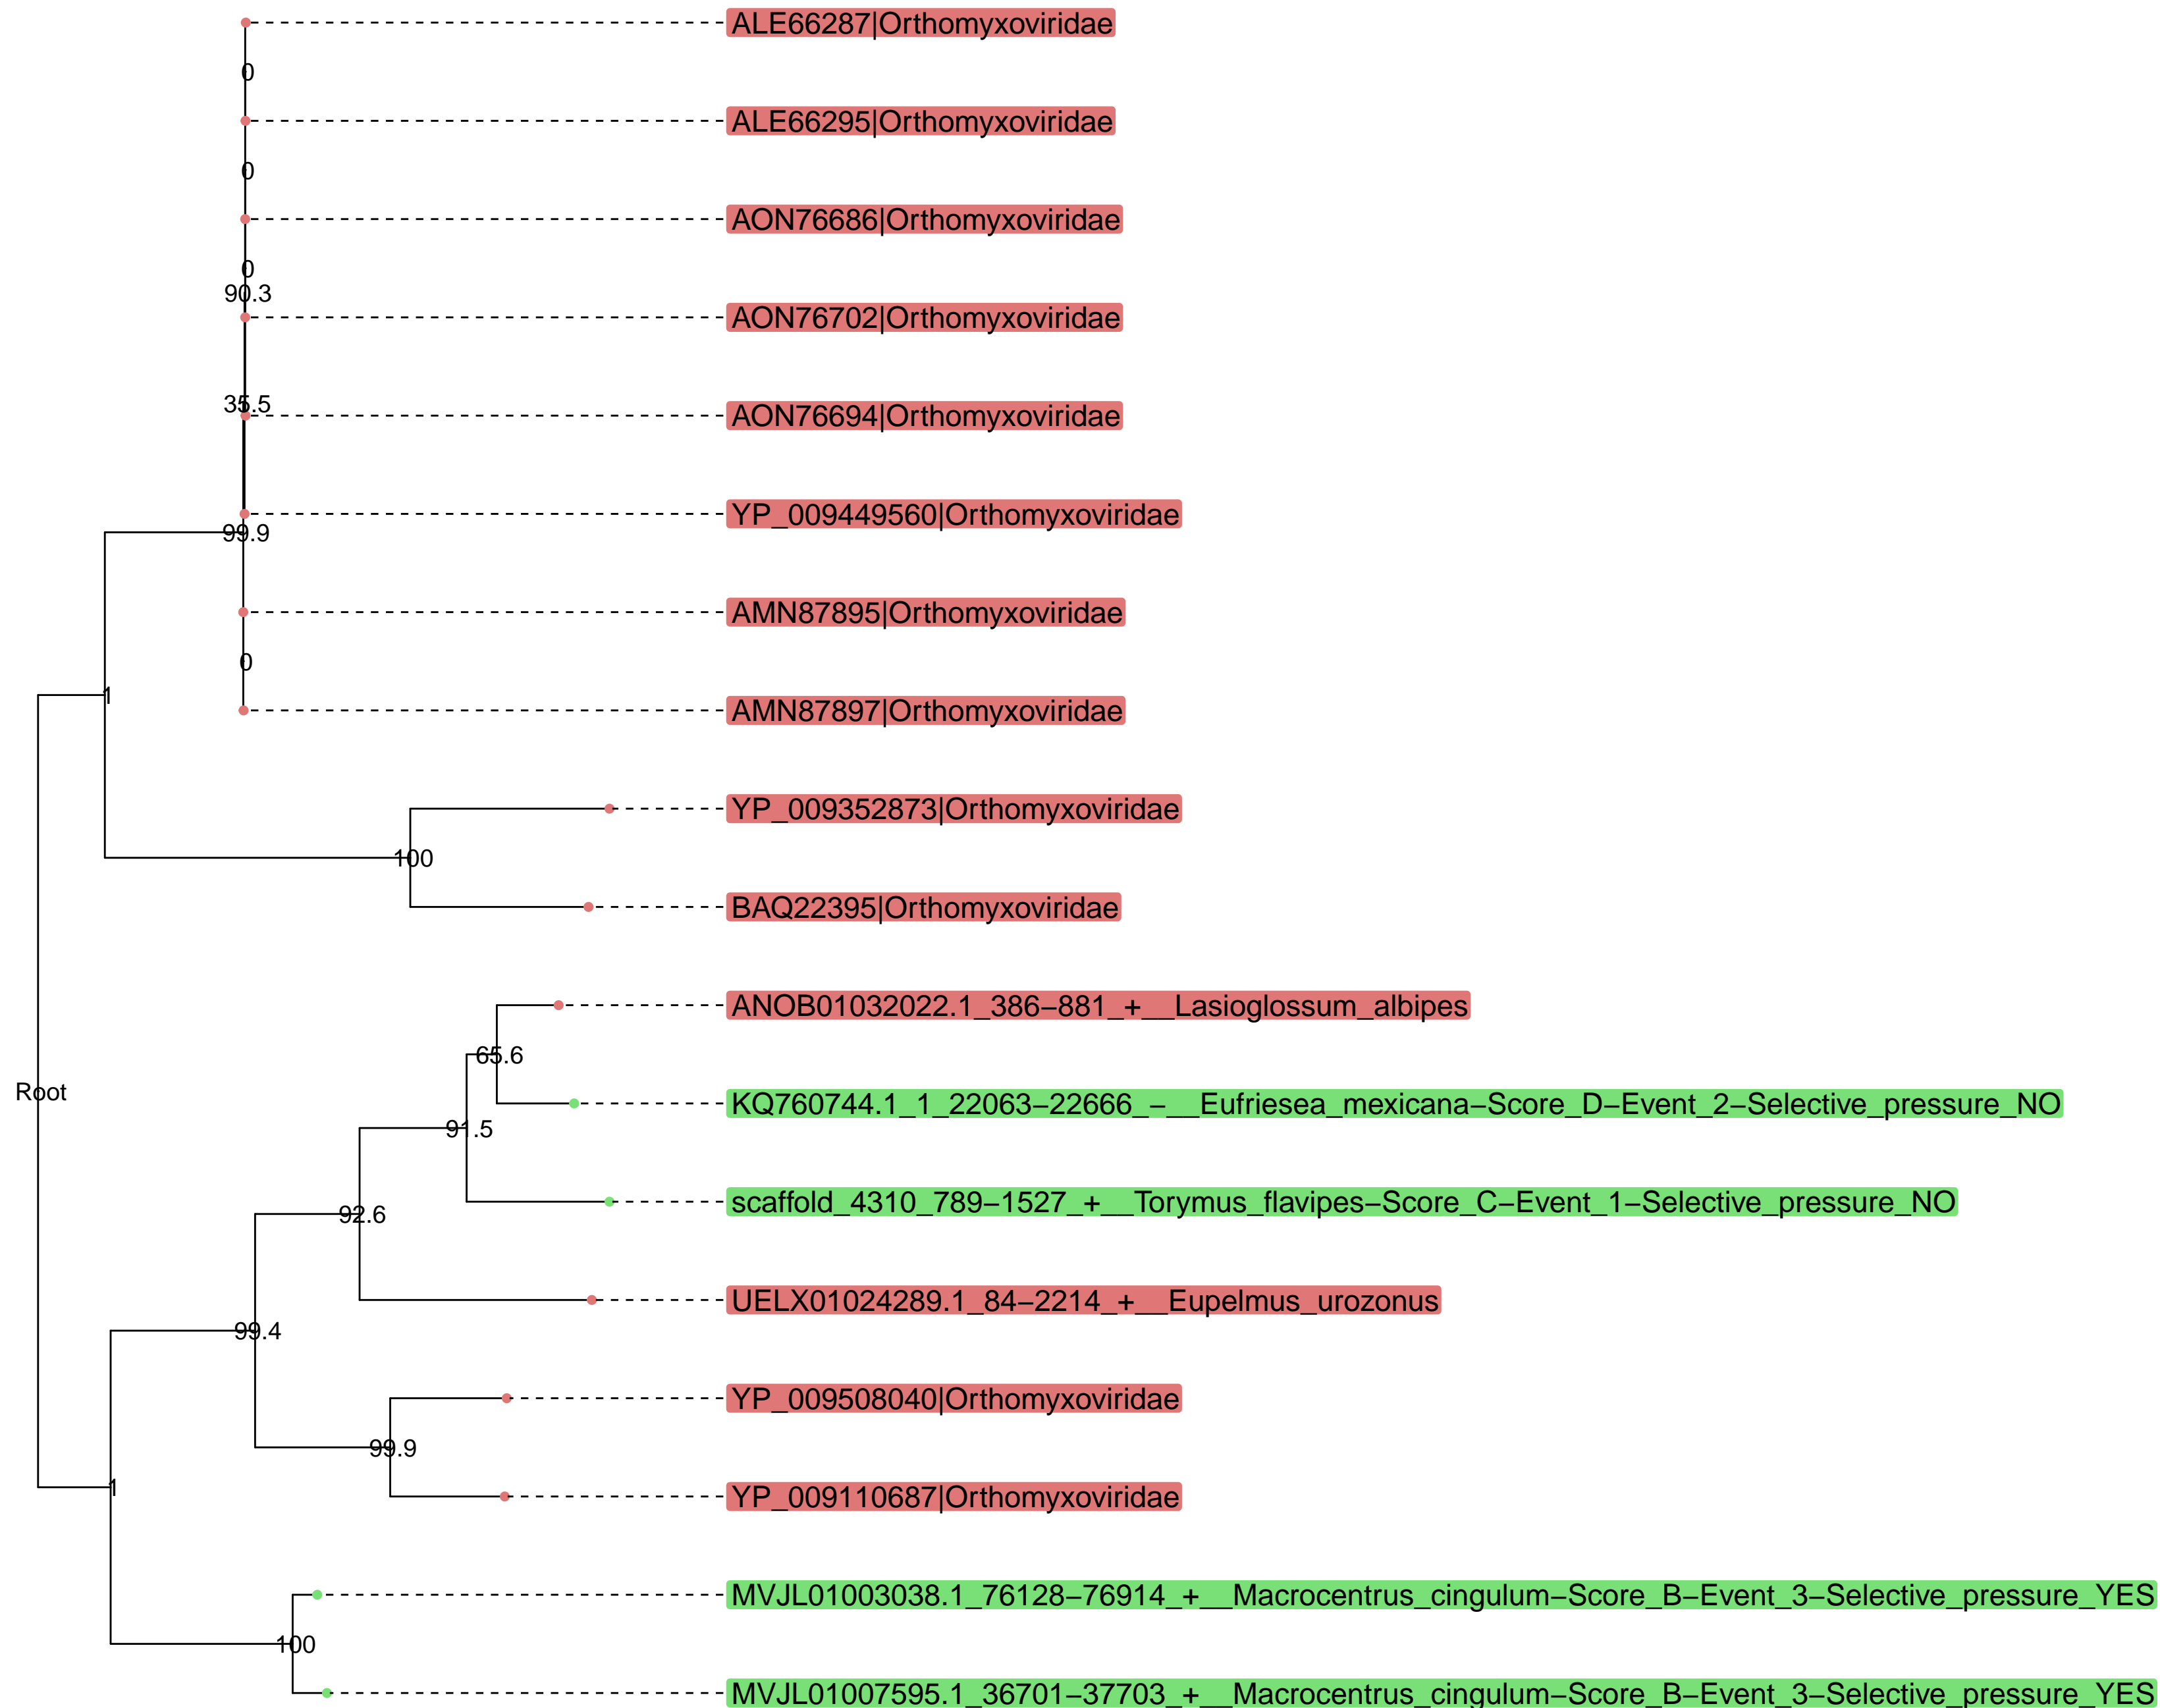



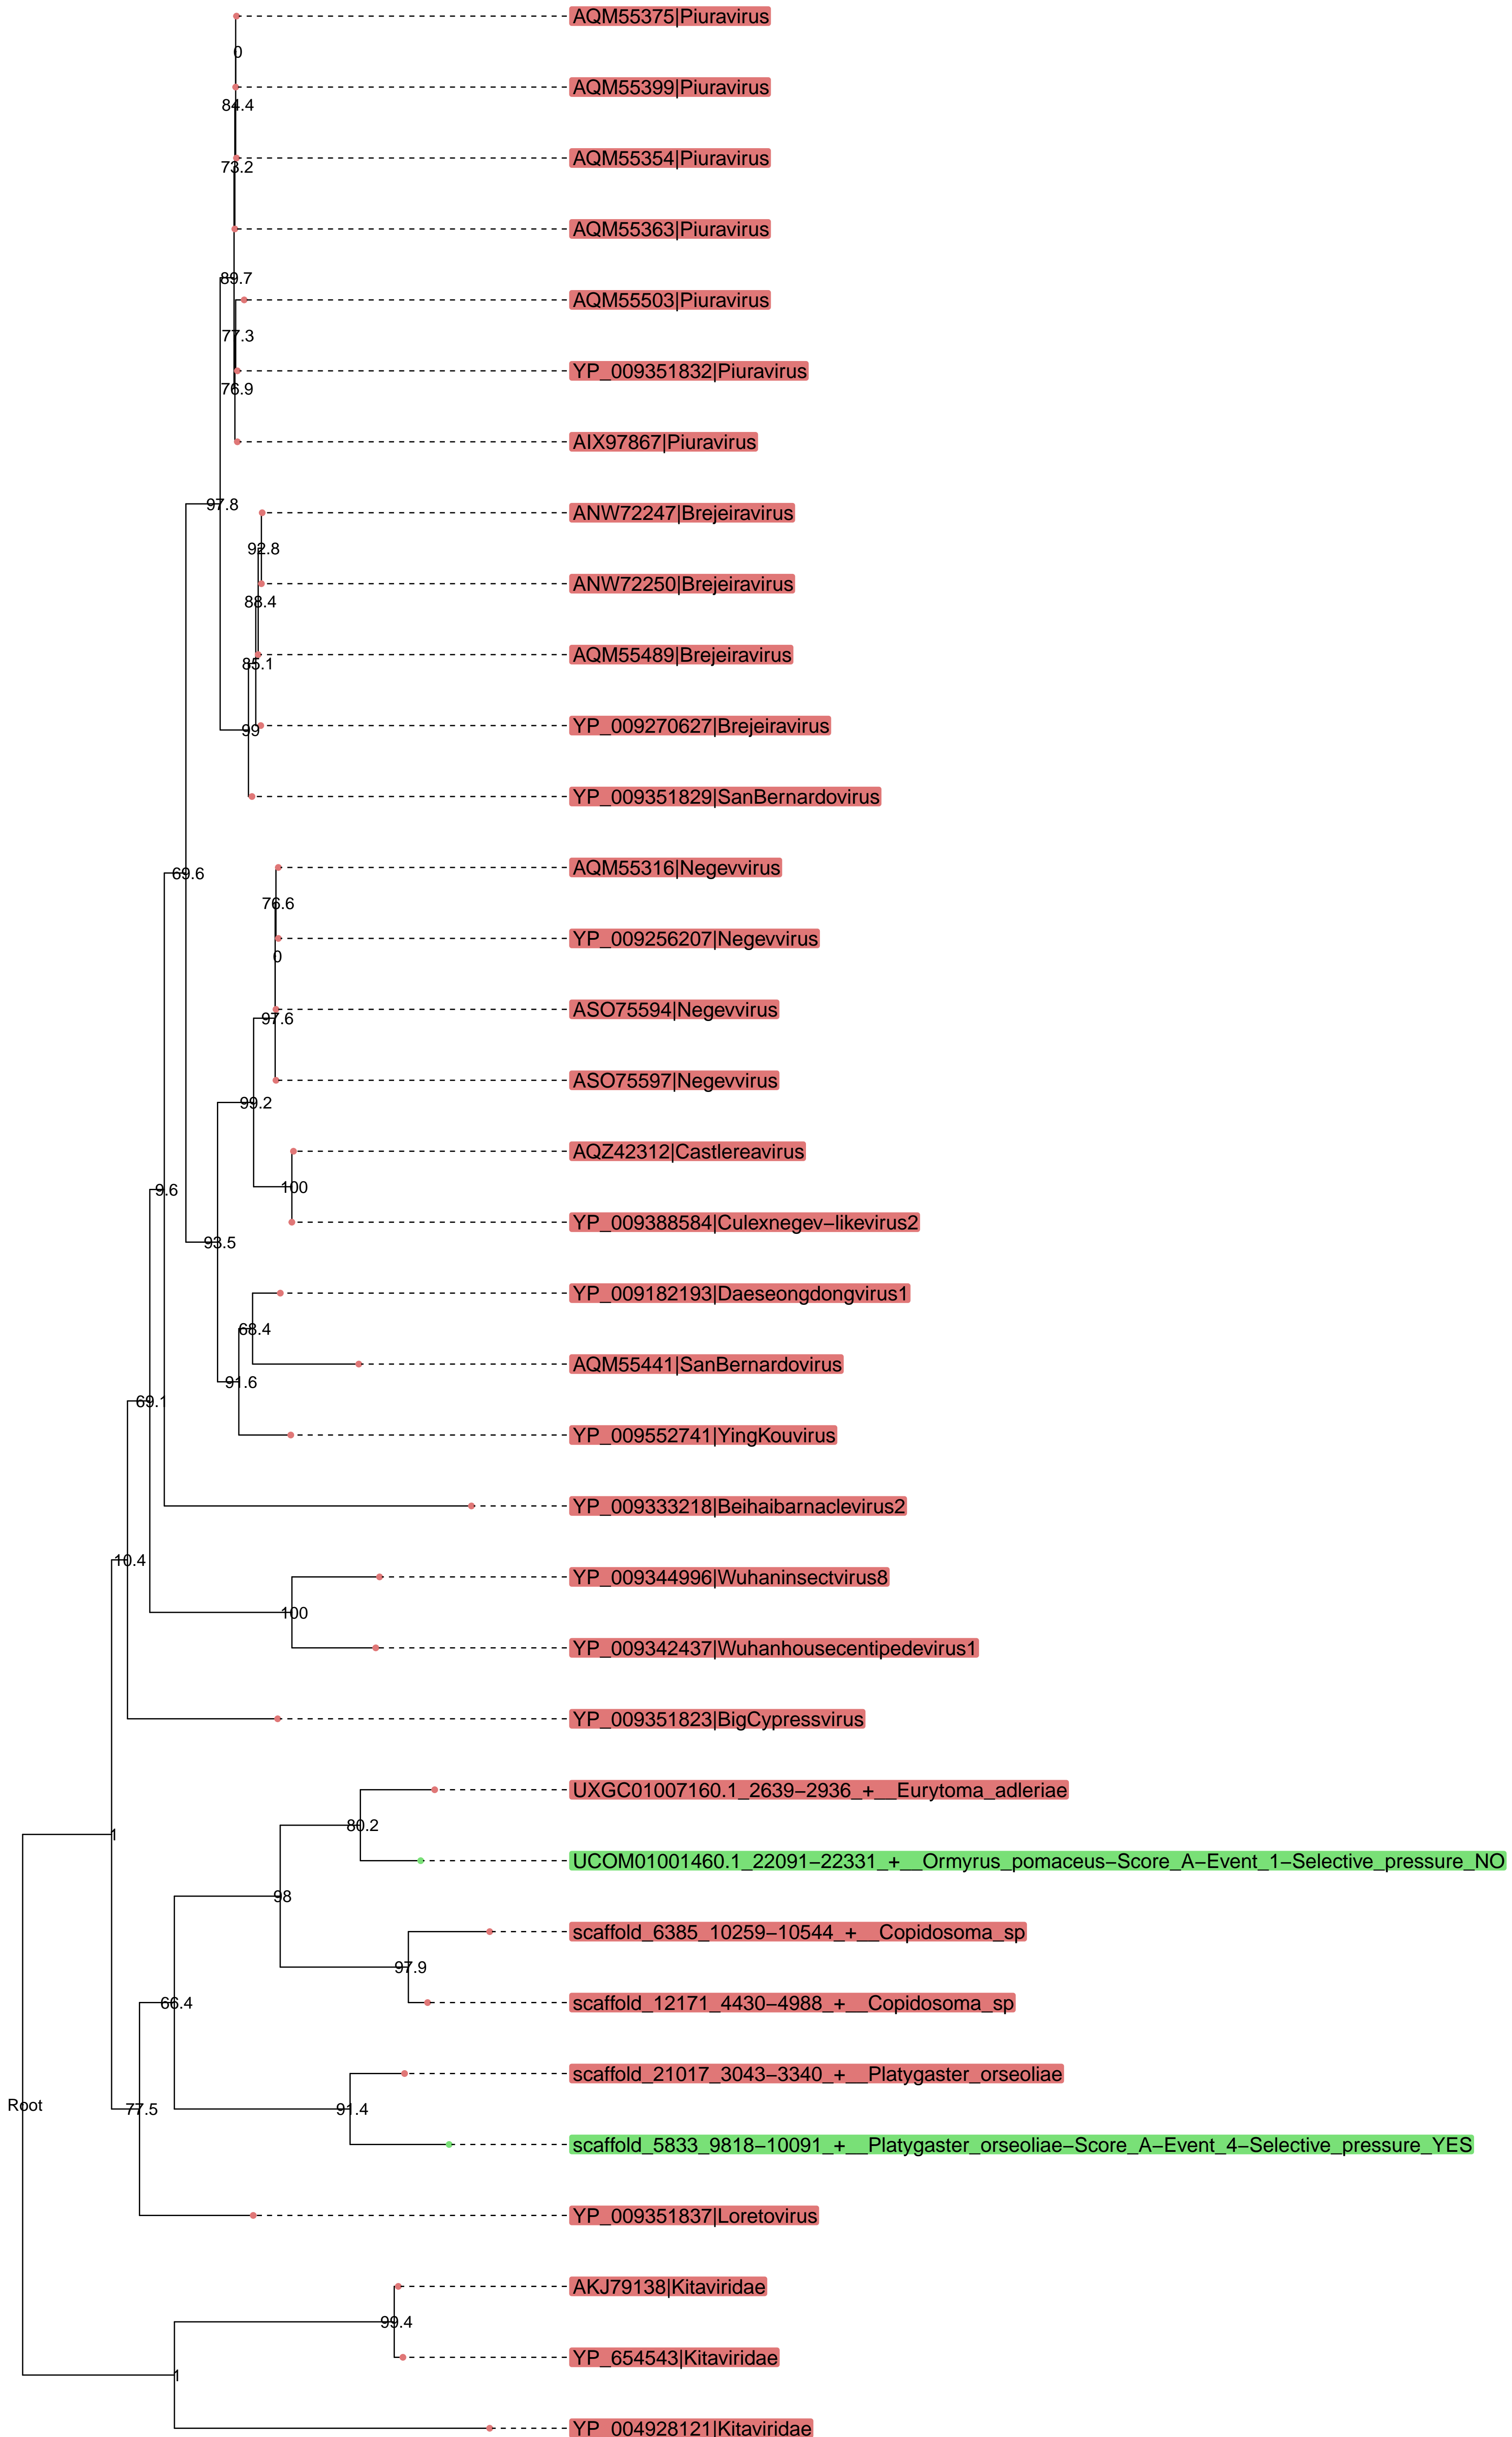

Cluster17514 – families involved : ['Orthomyxoviridae'] – putative protein : ['Nucleoprotein']

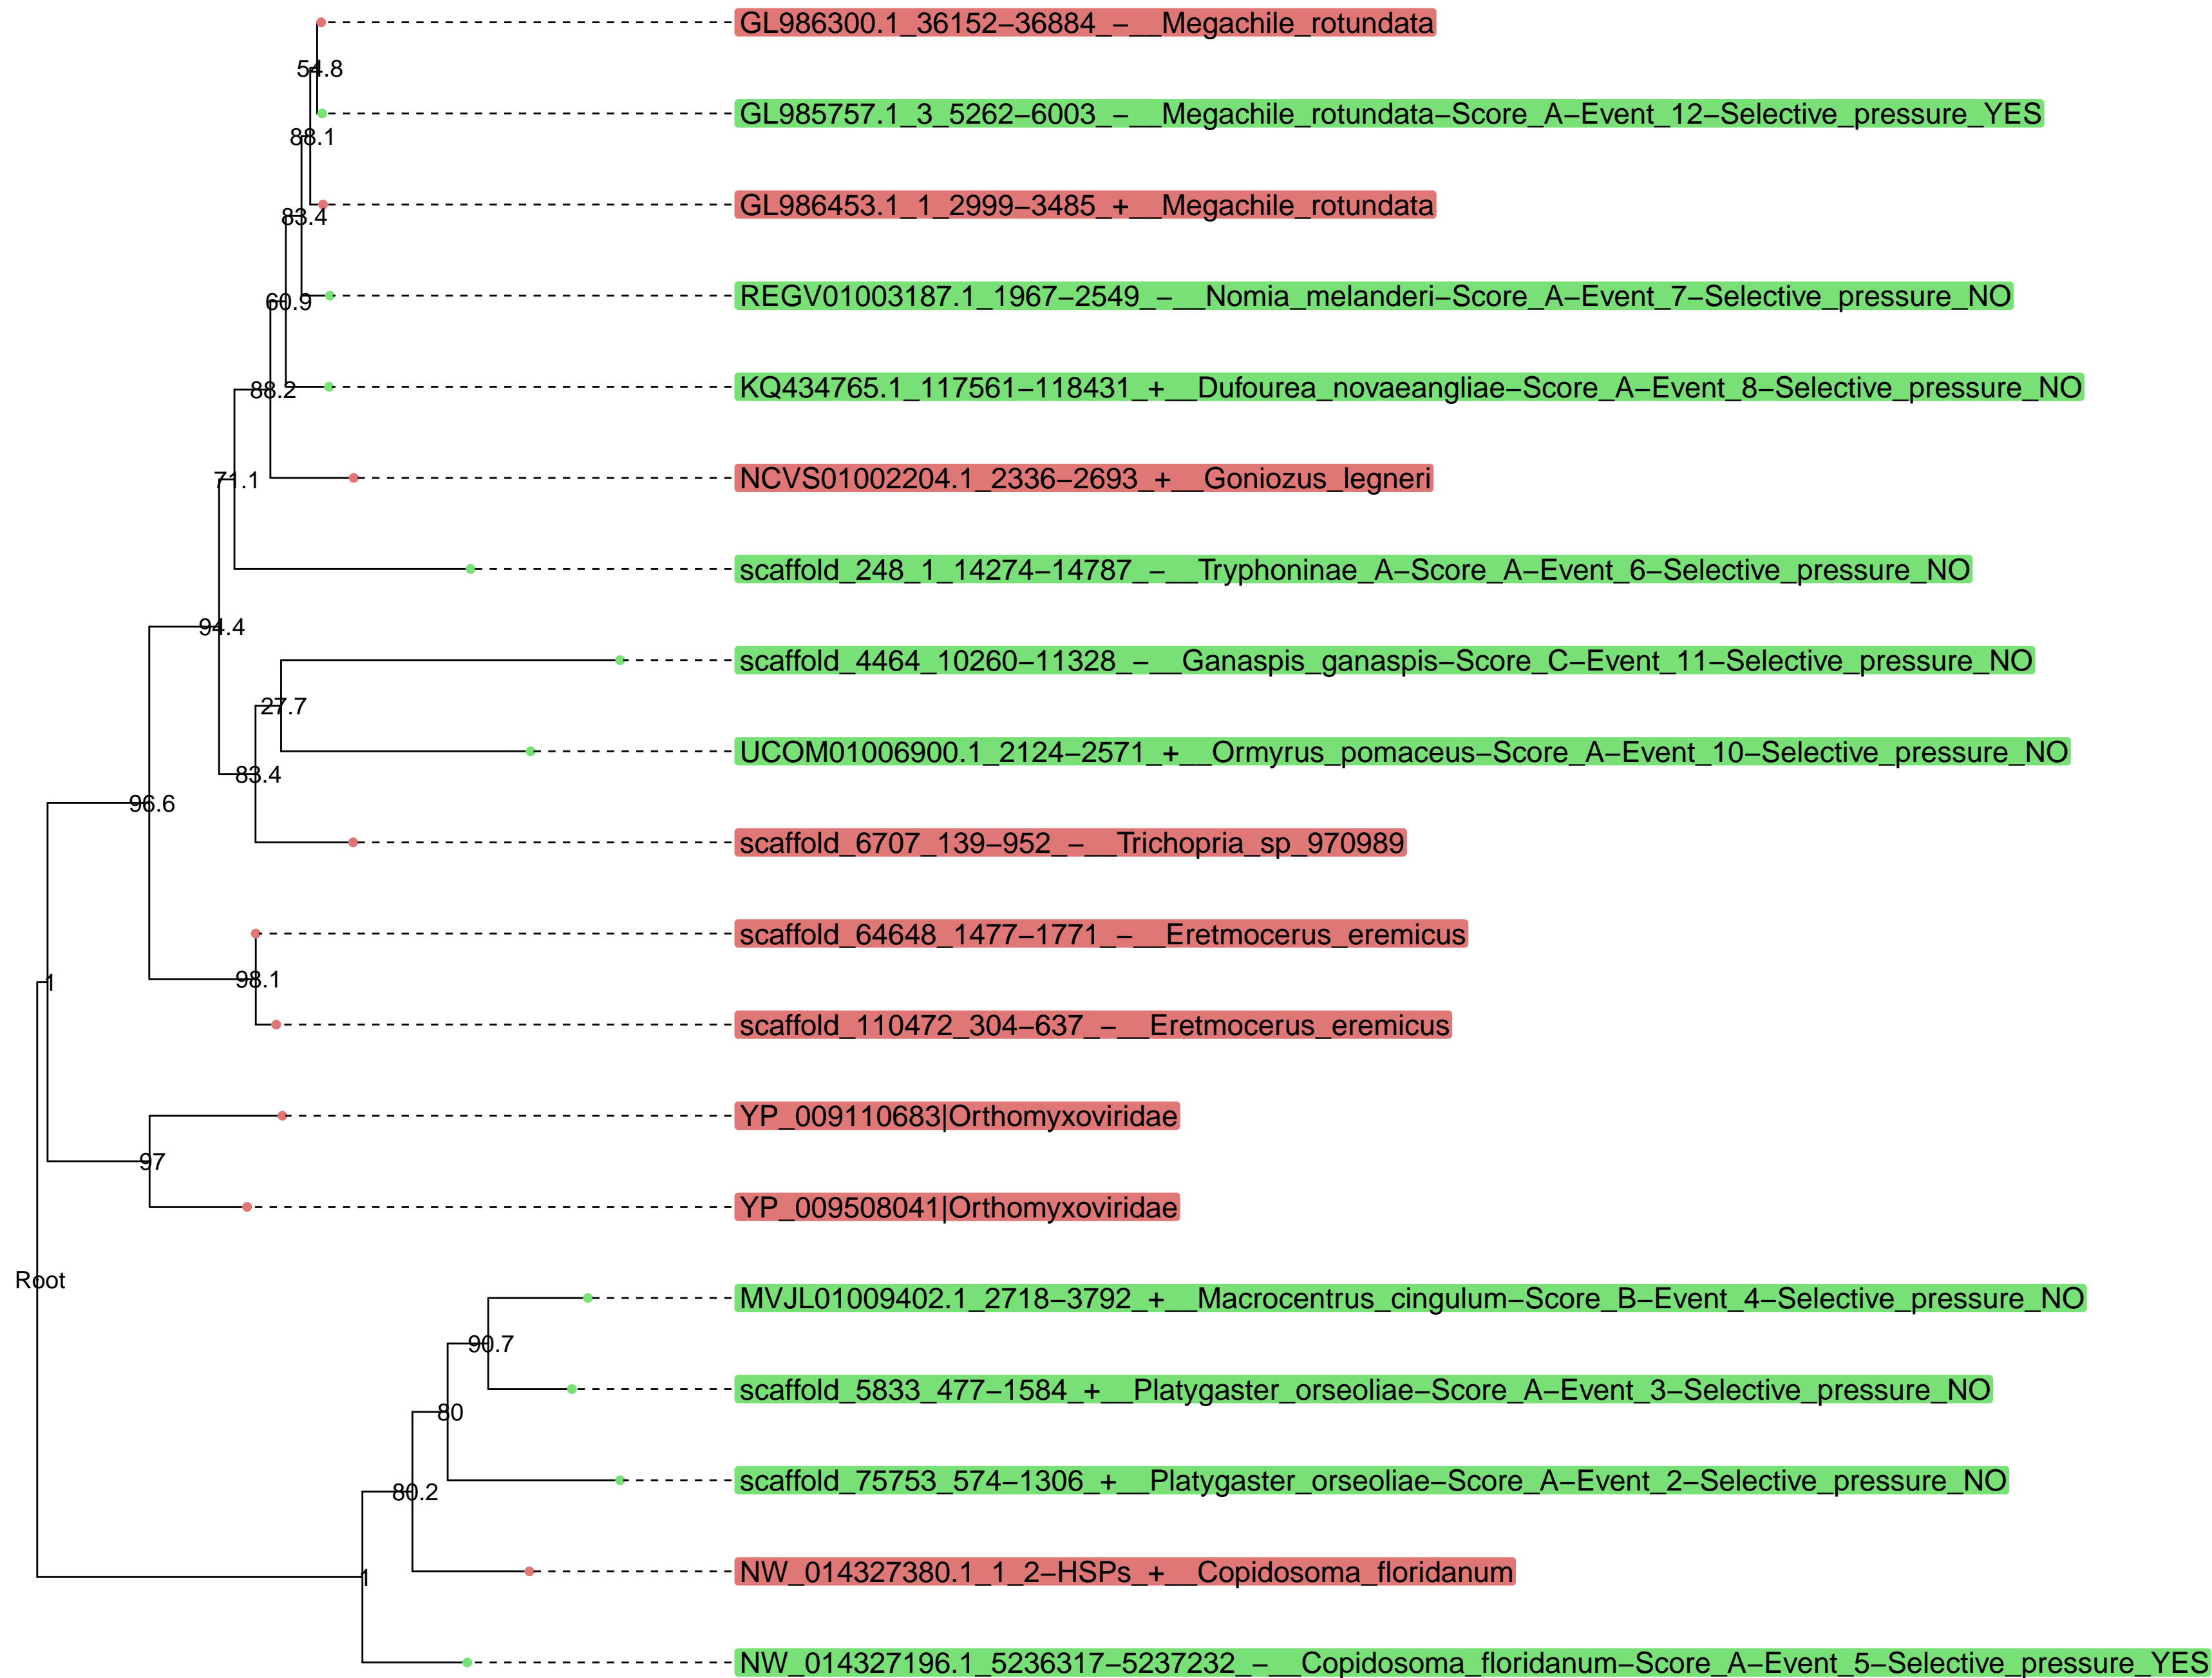

Cluster201 – families involved : ['Nudiviridae'] – putative protein : ['XPG I-region']

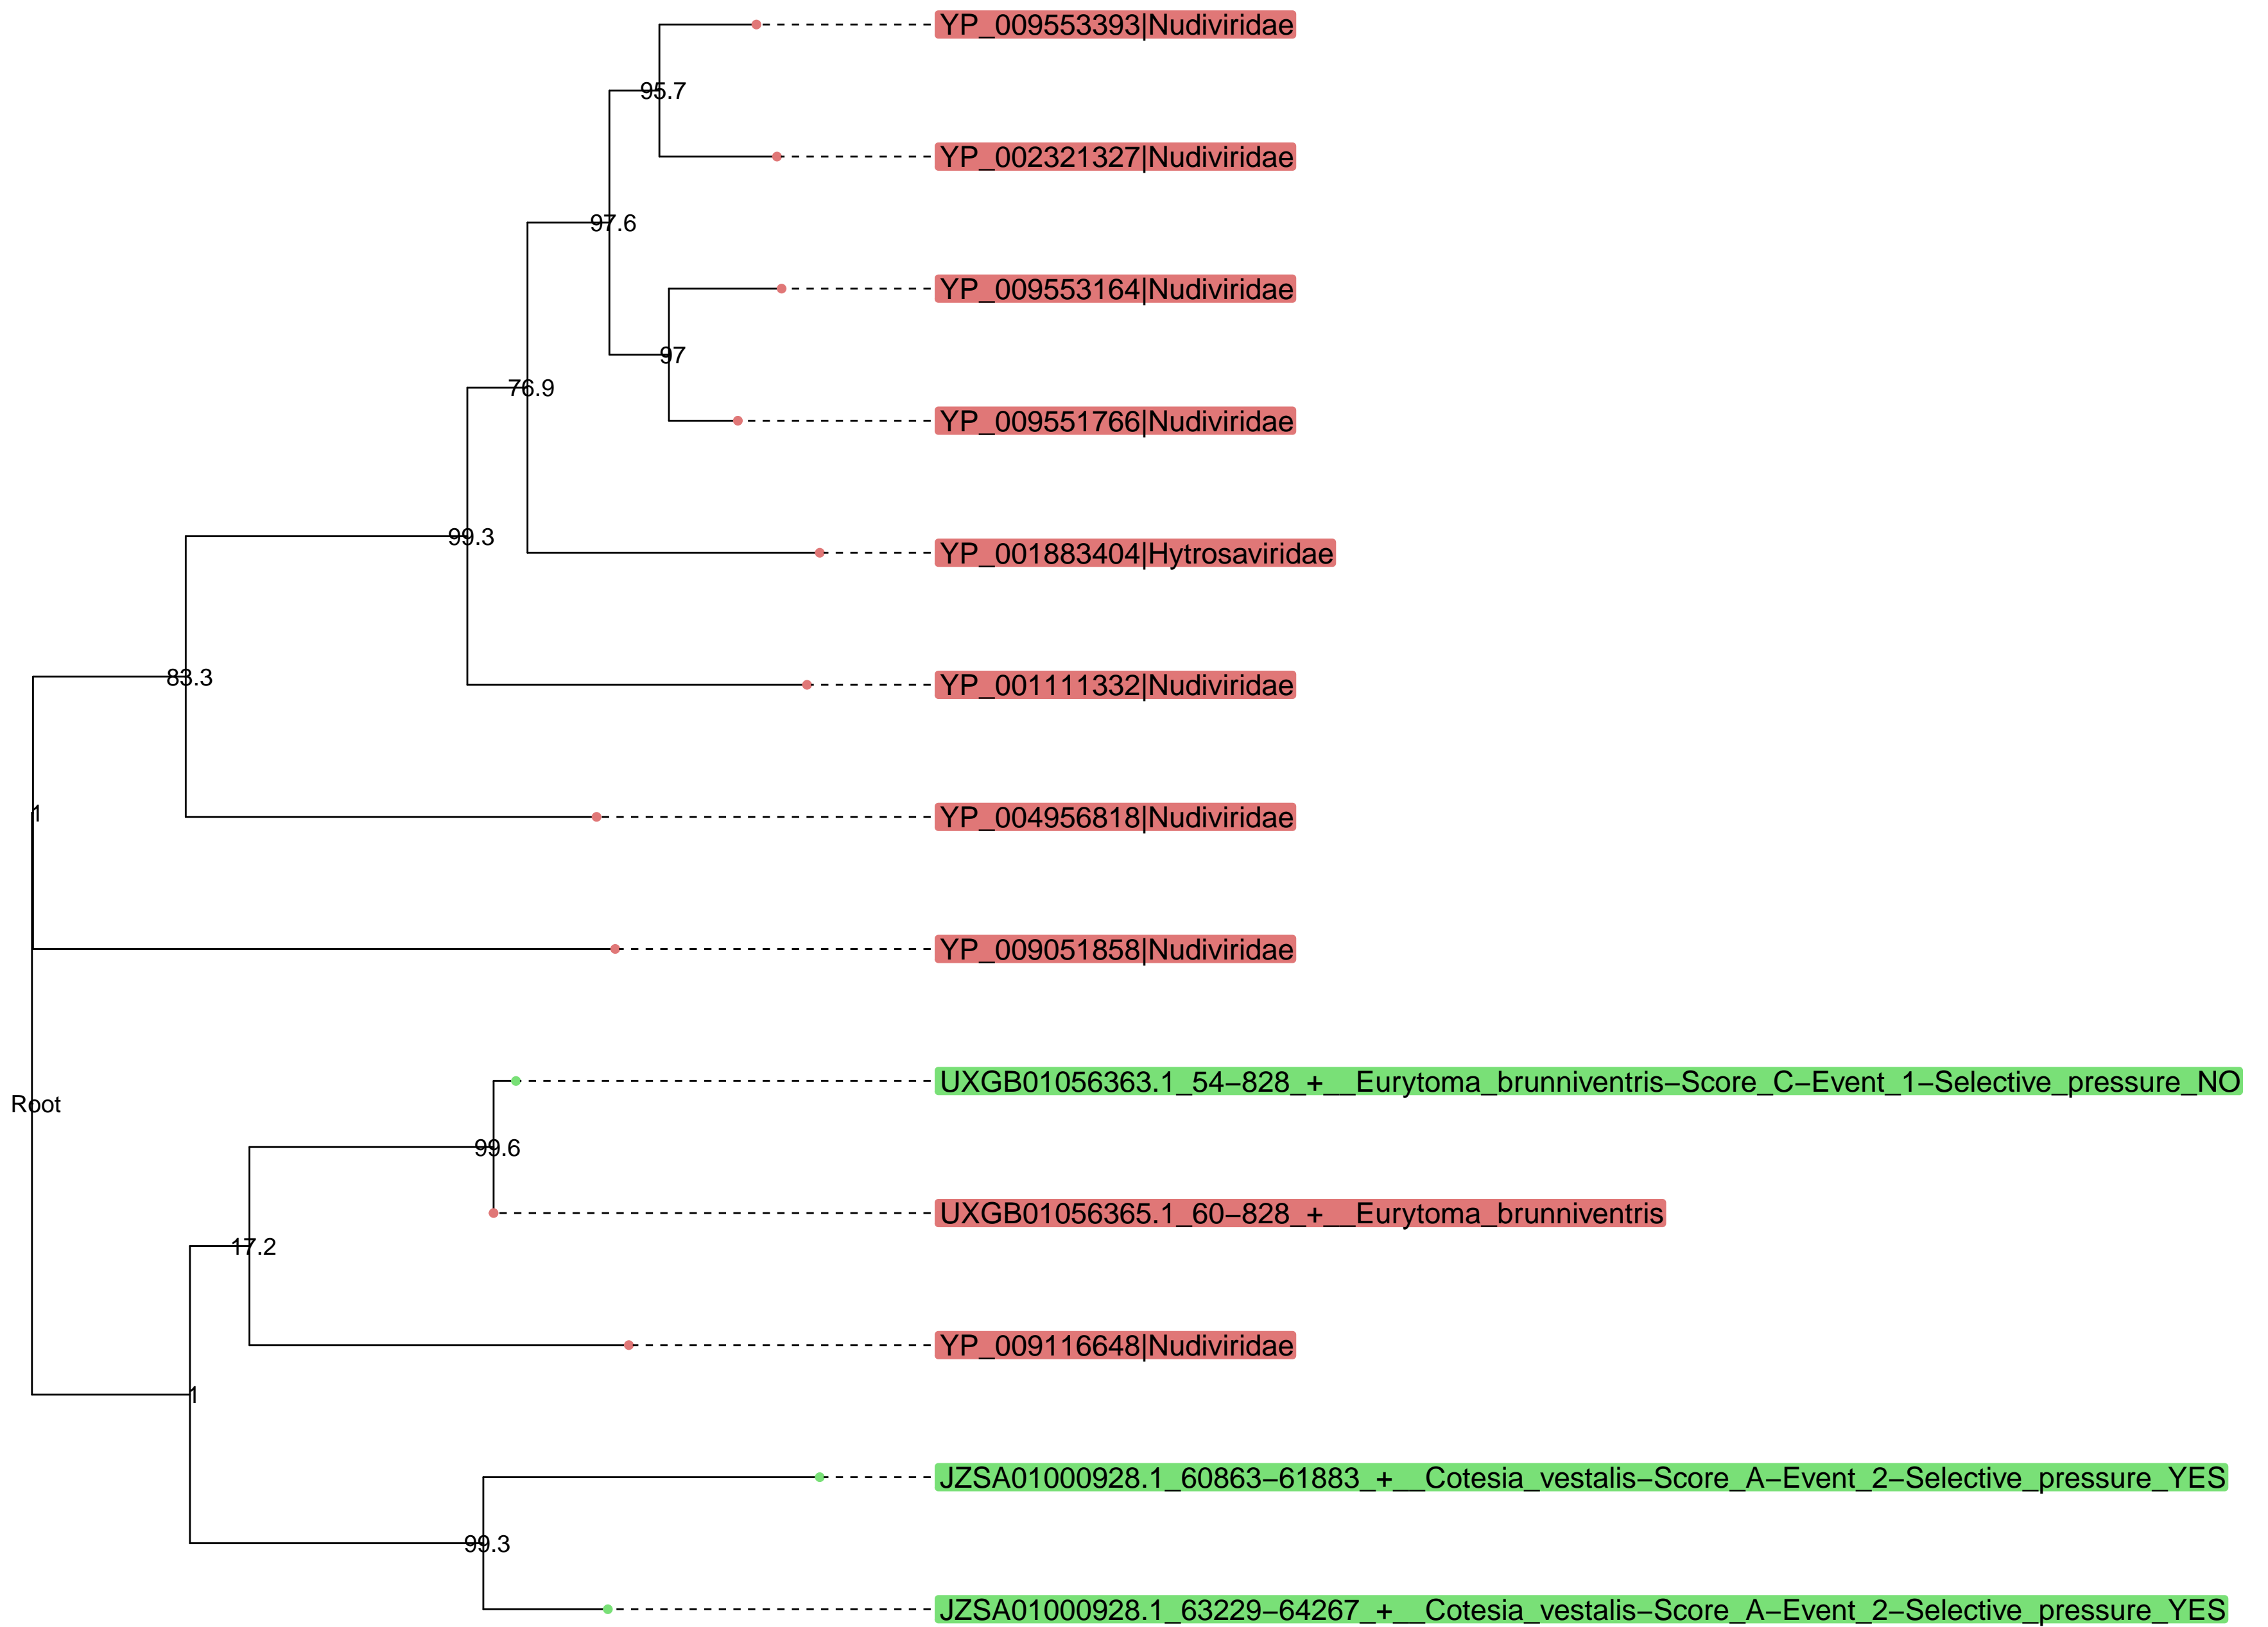

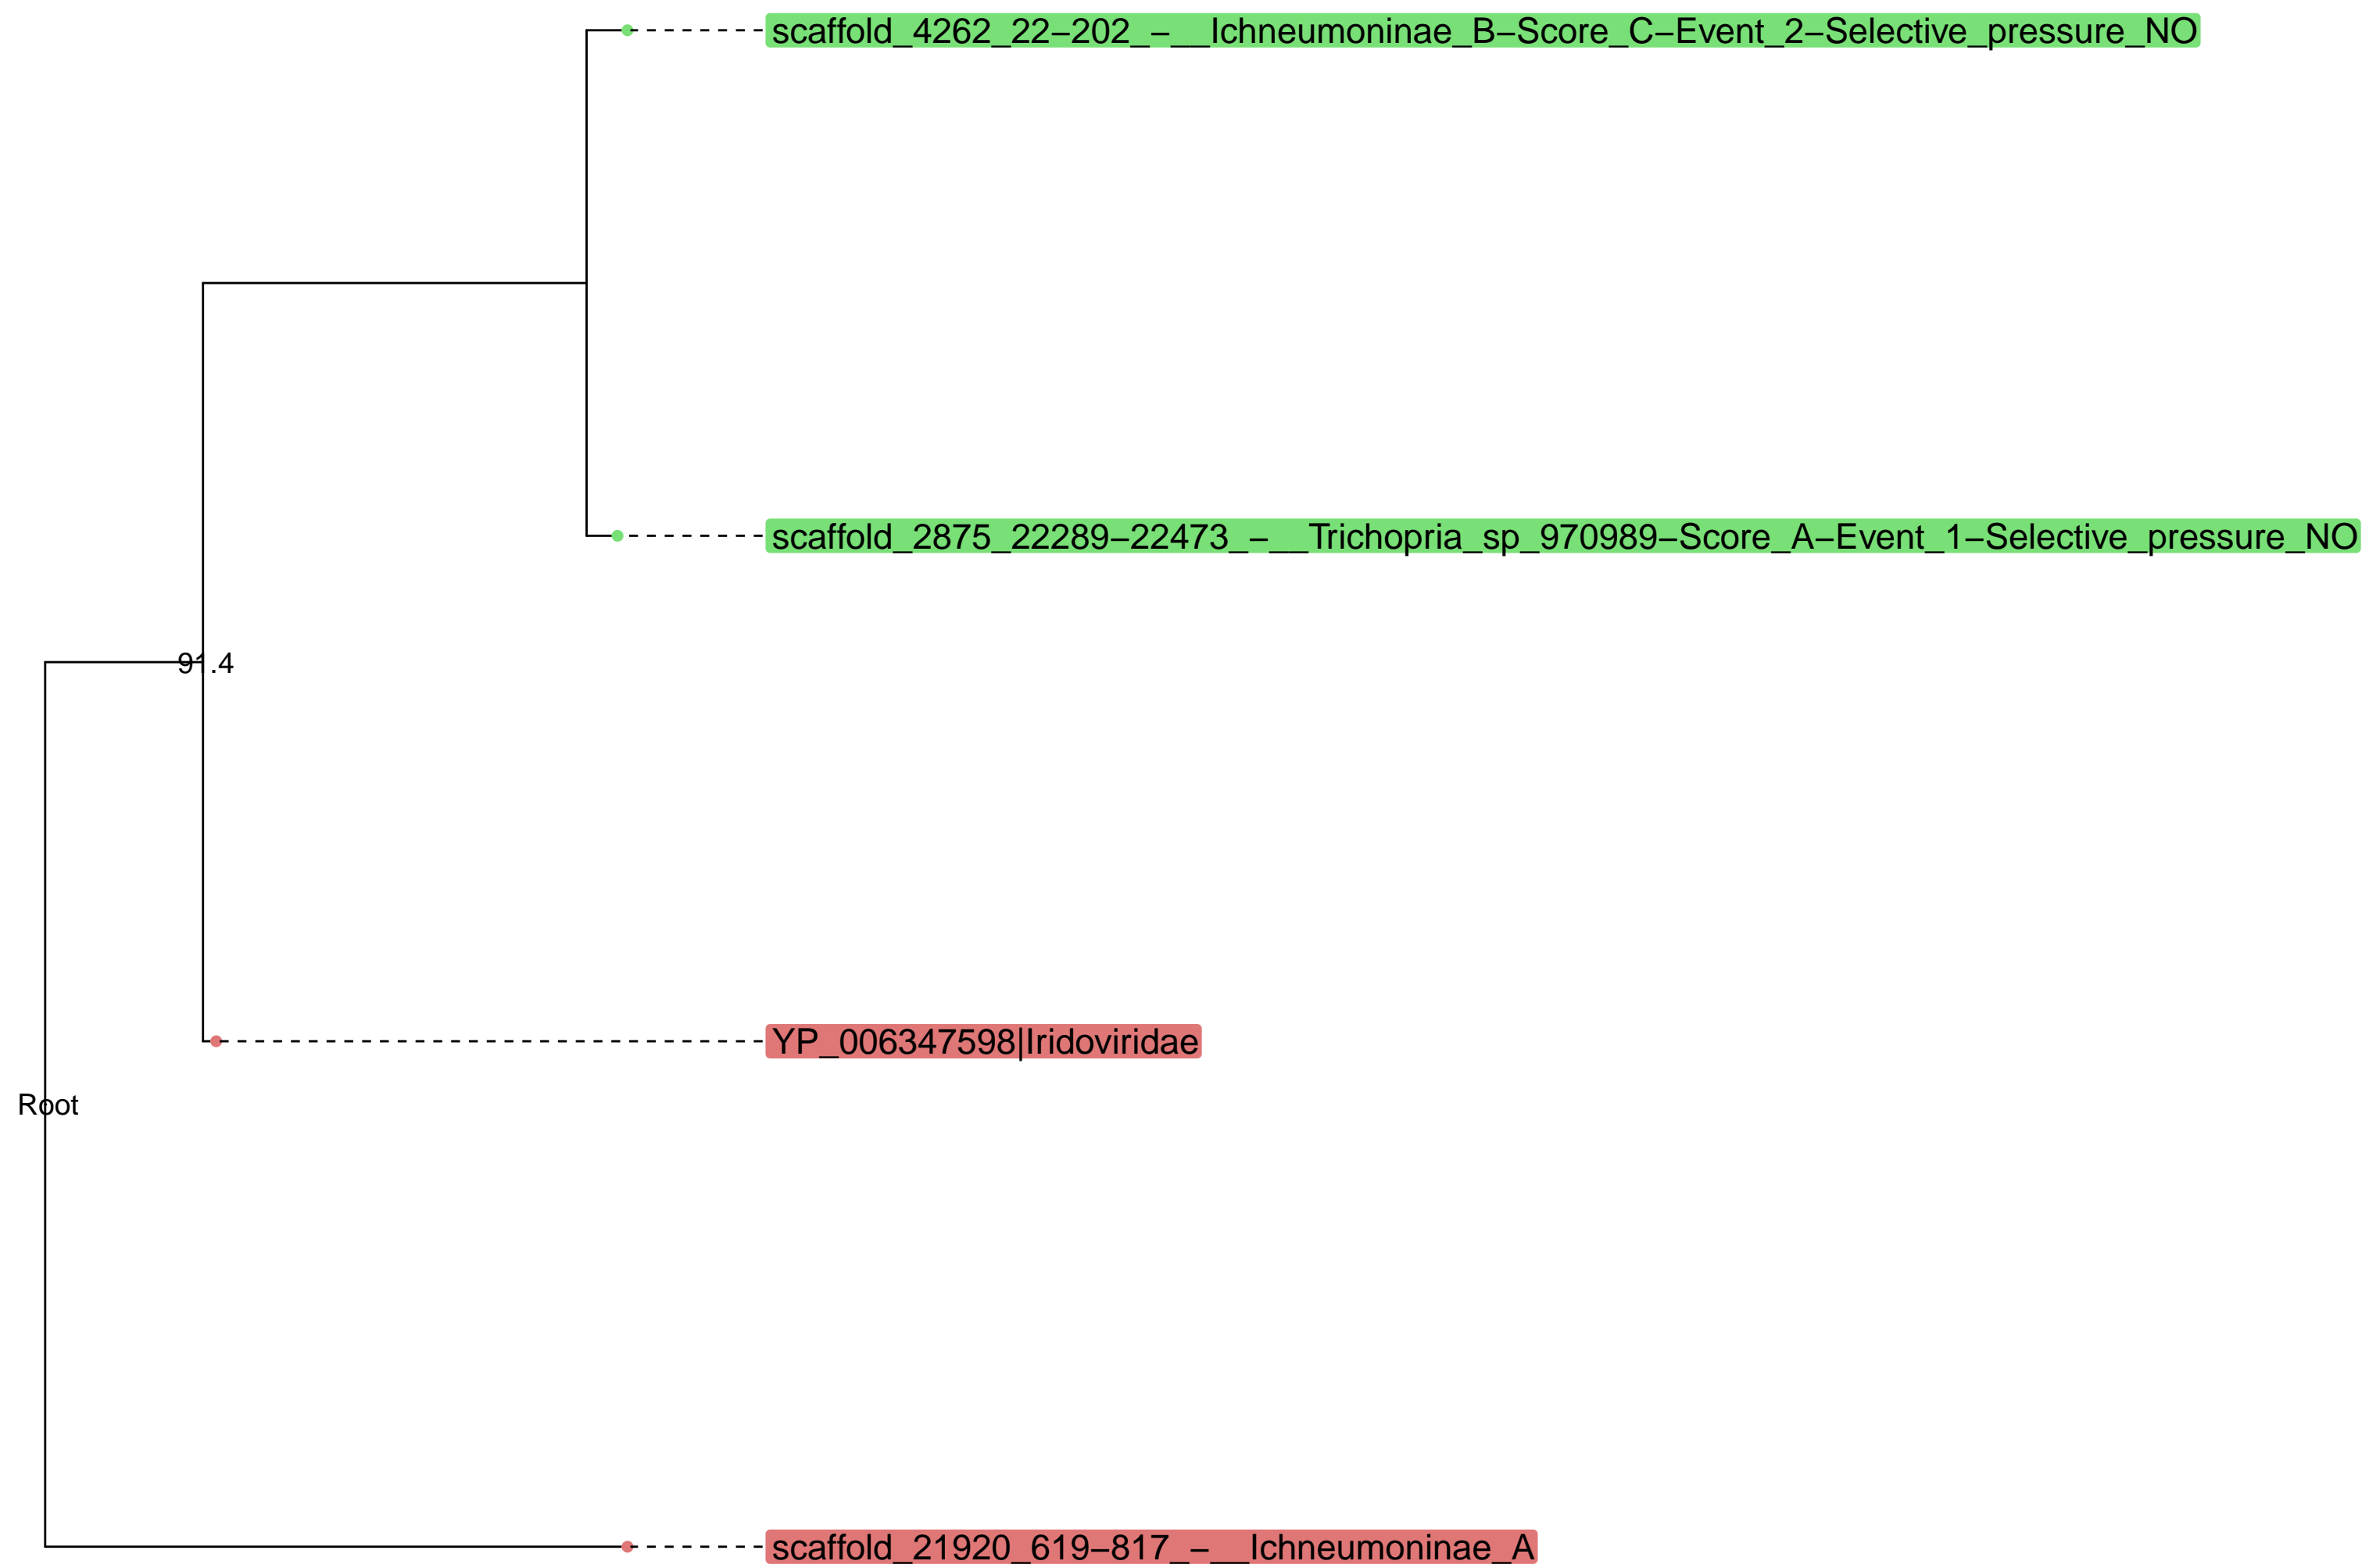

Cluster17265 – families involved : ['Partitiviridae'] – putative protein : ['Capsid protein']

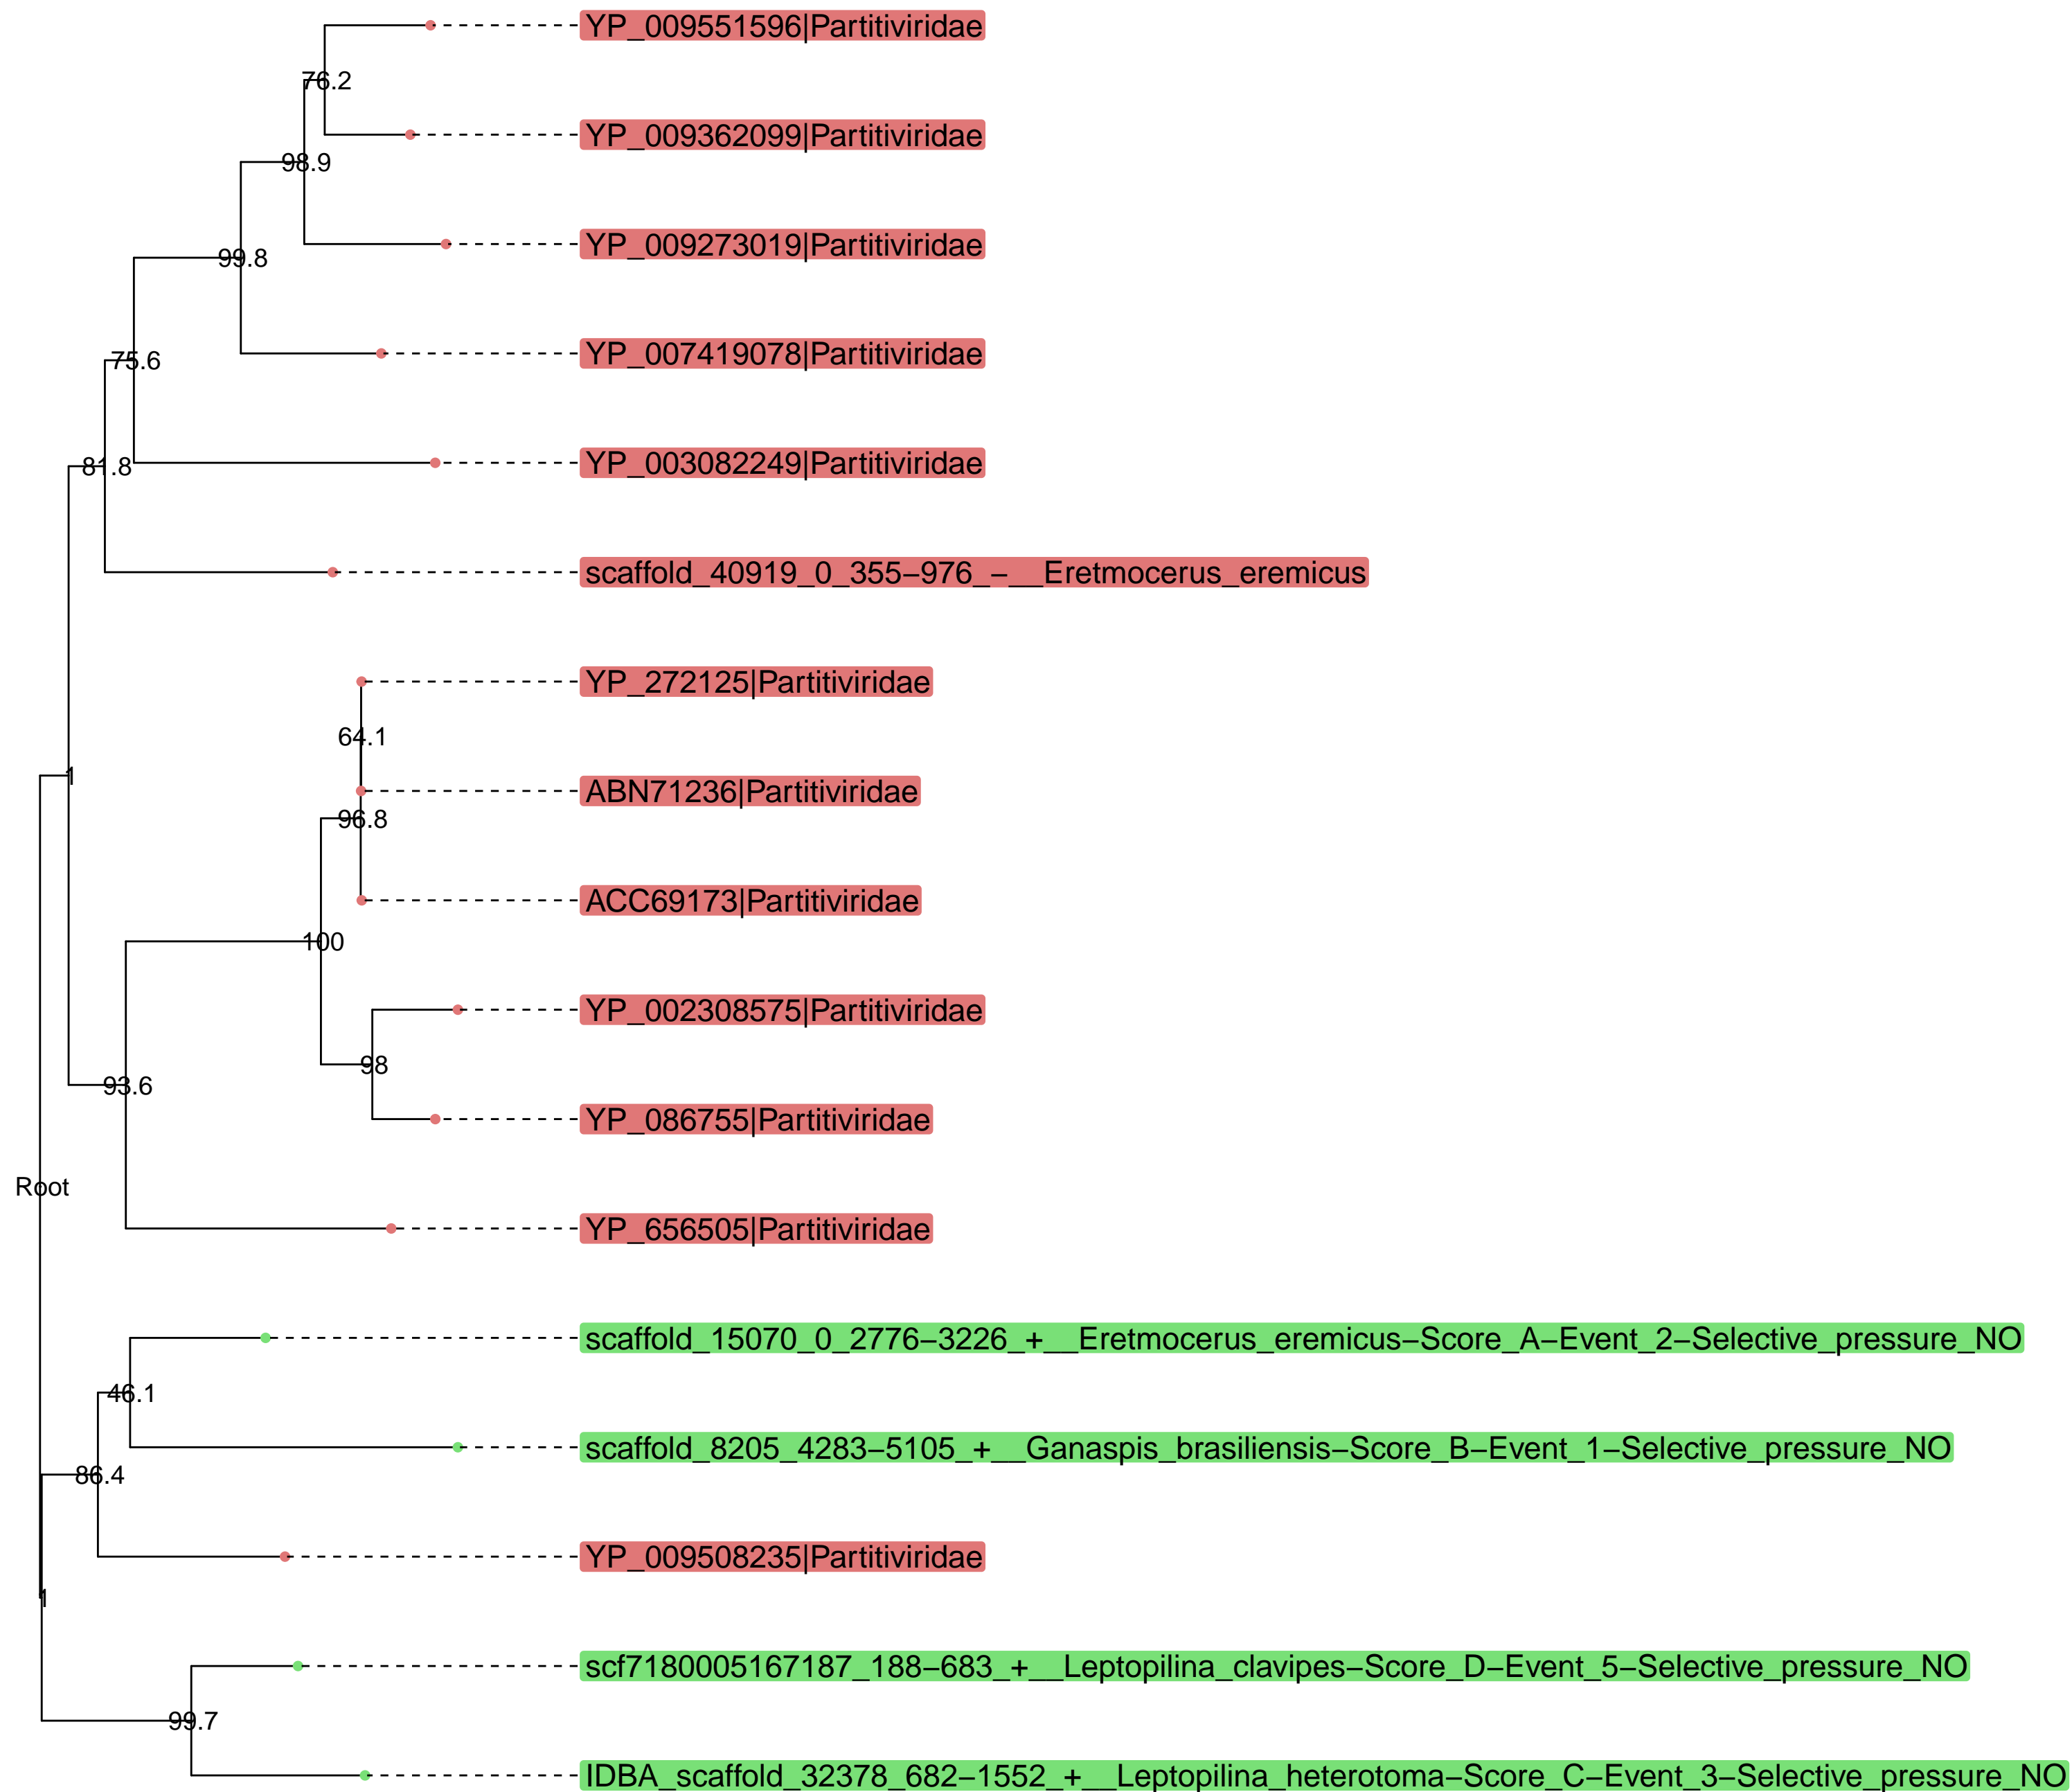

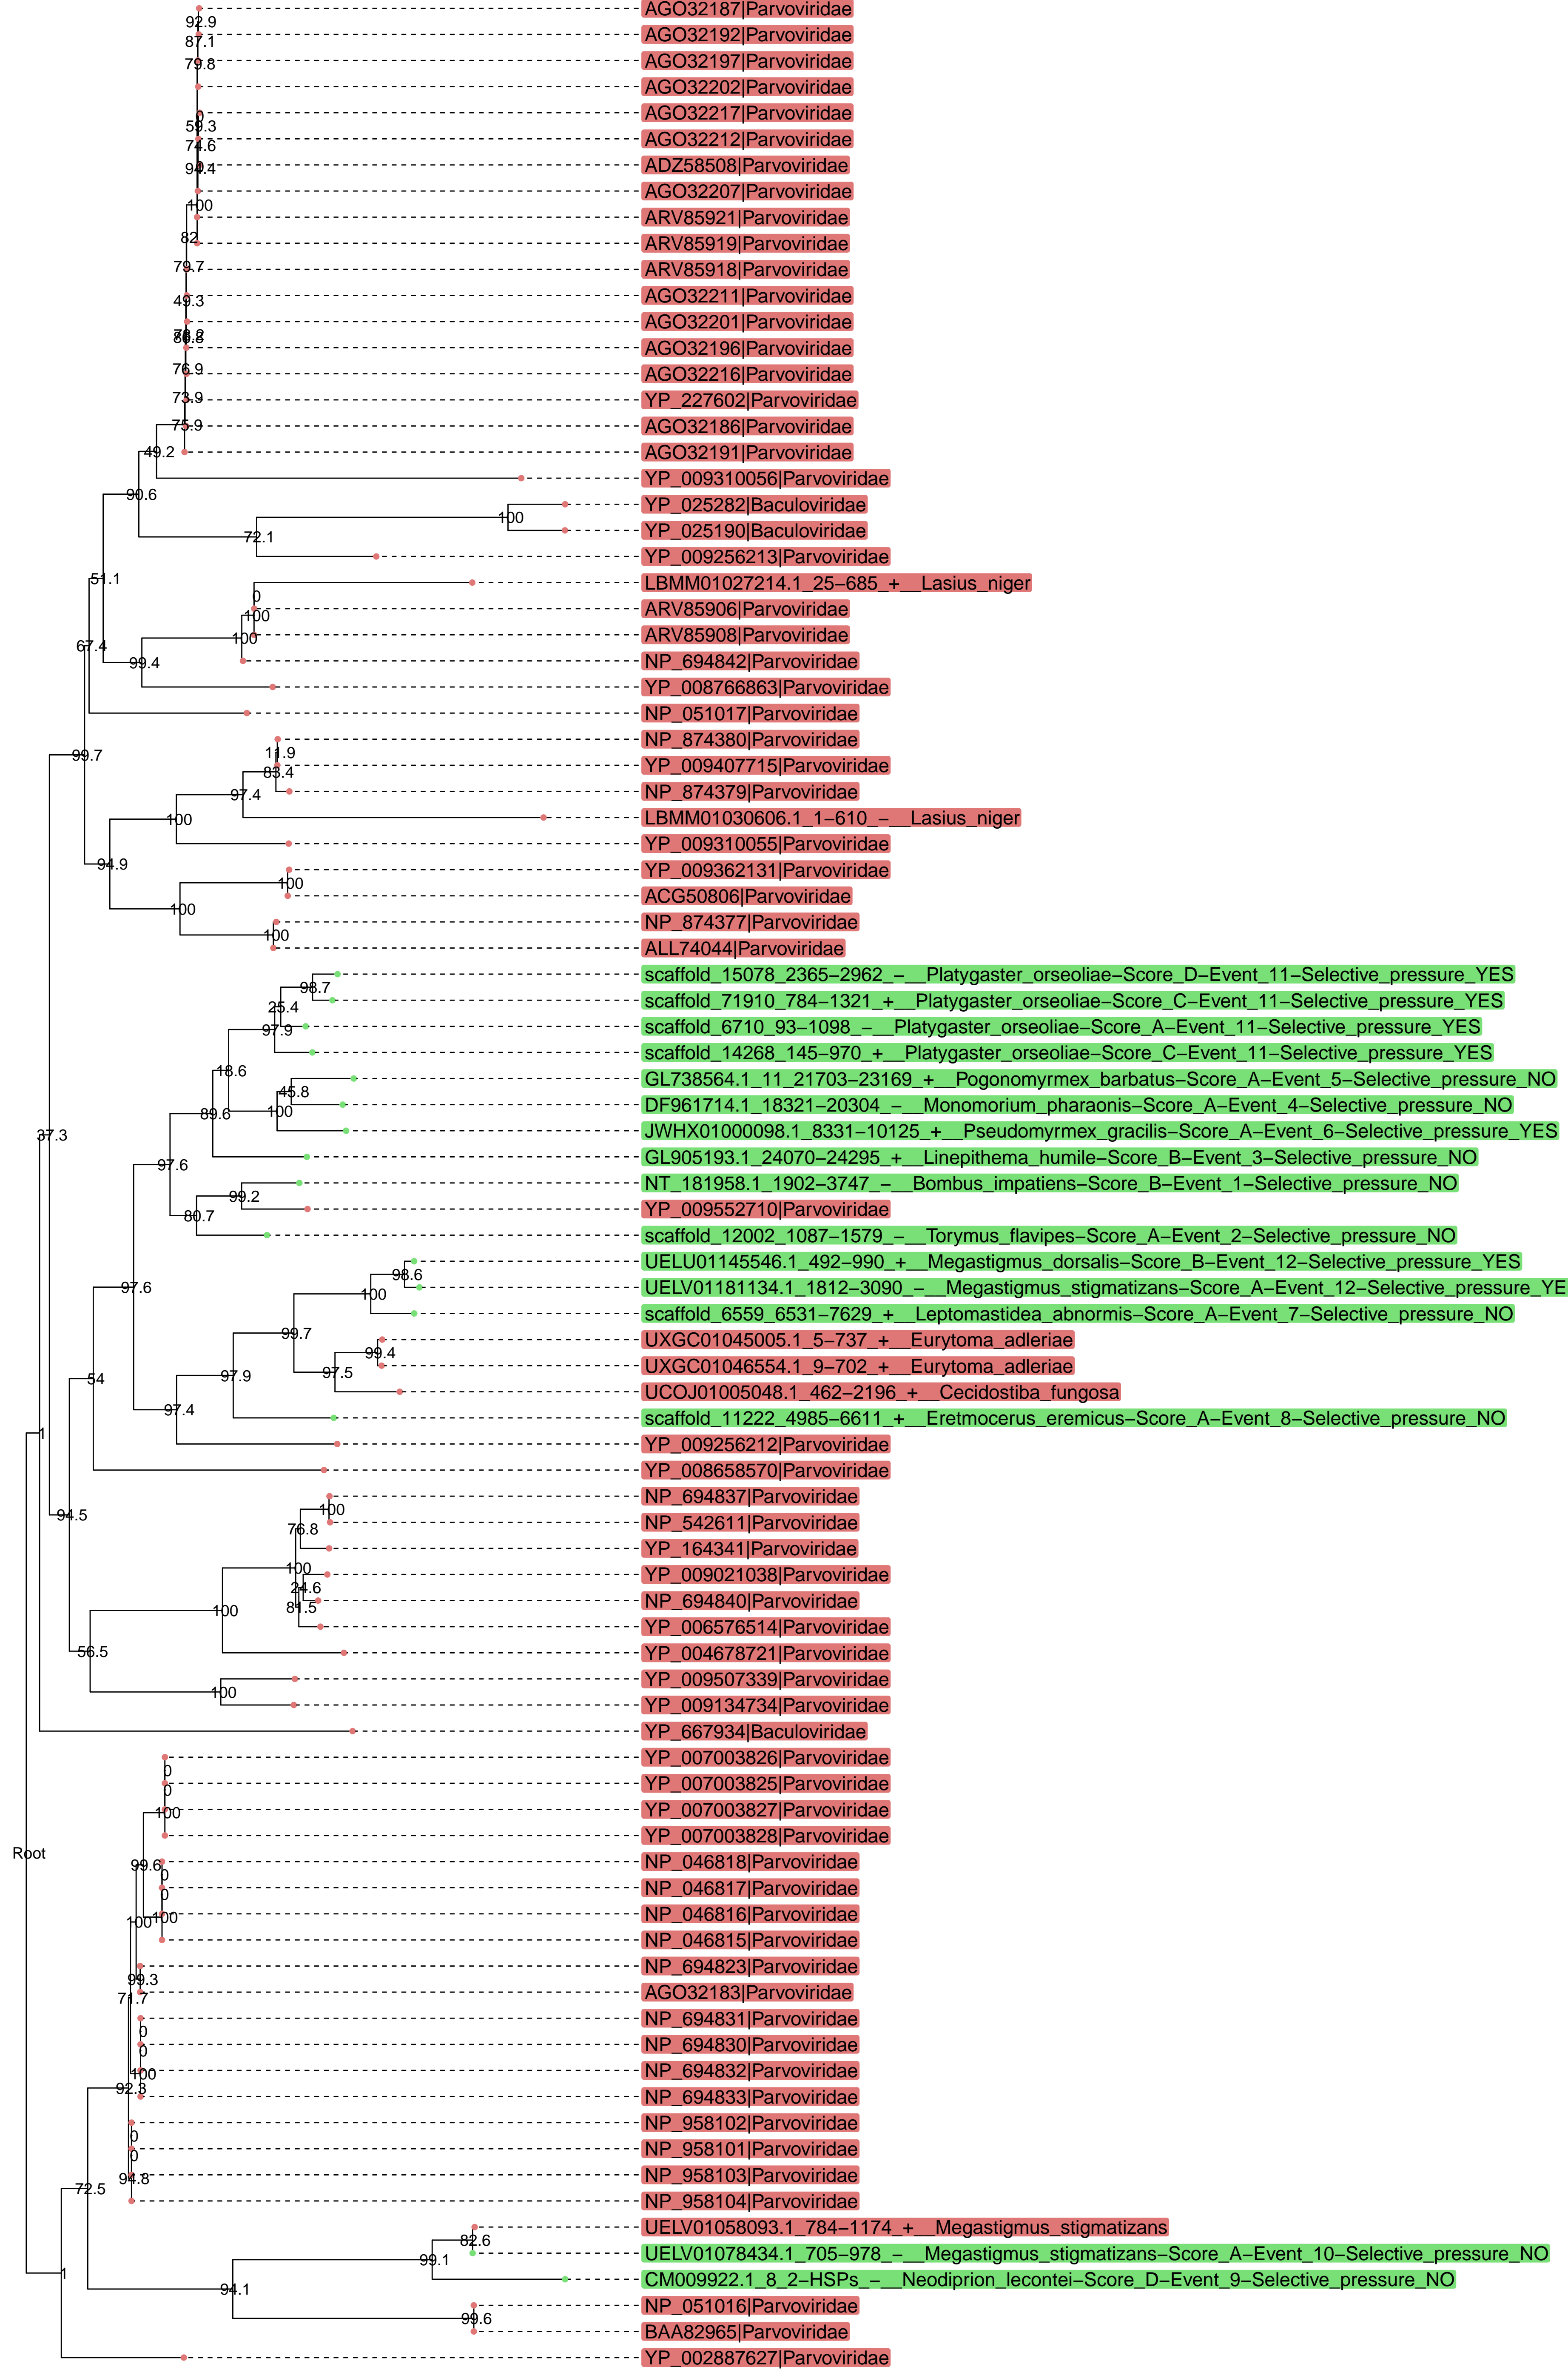

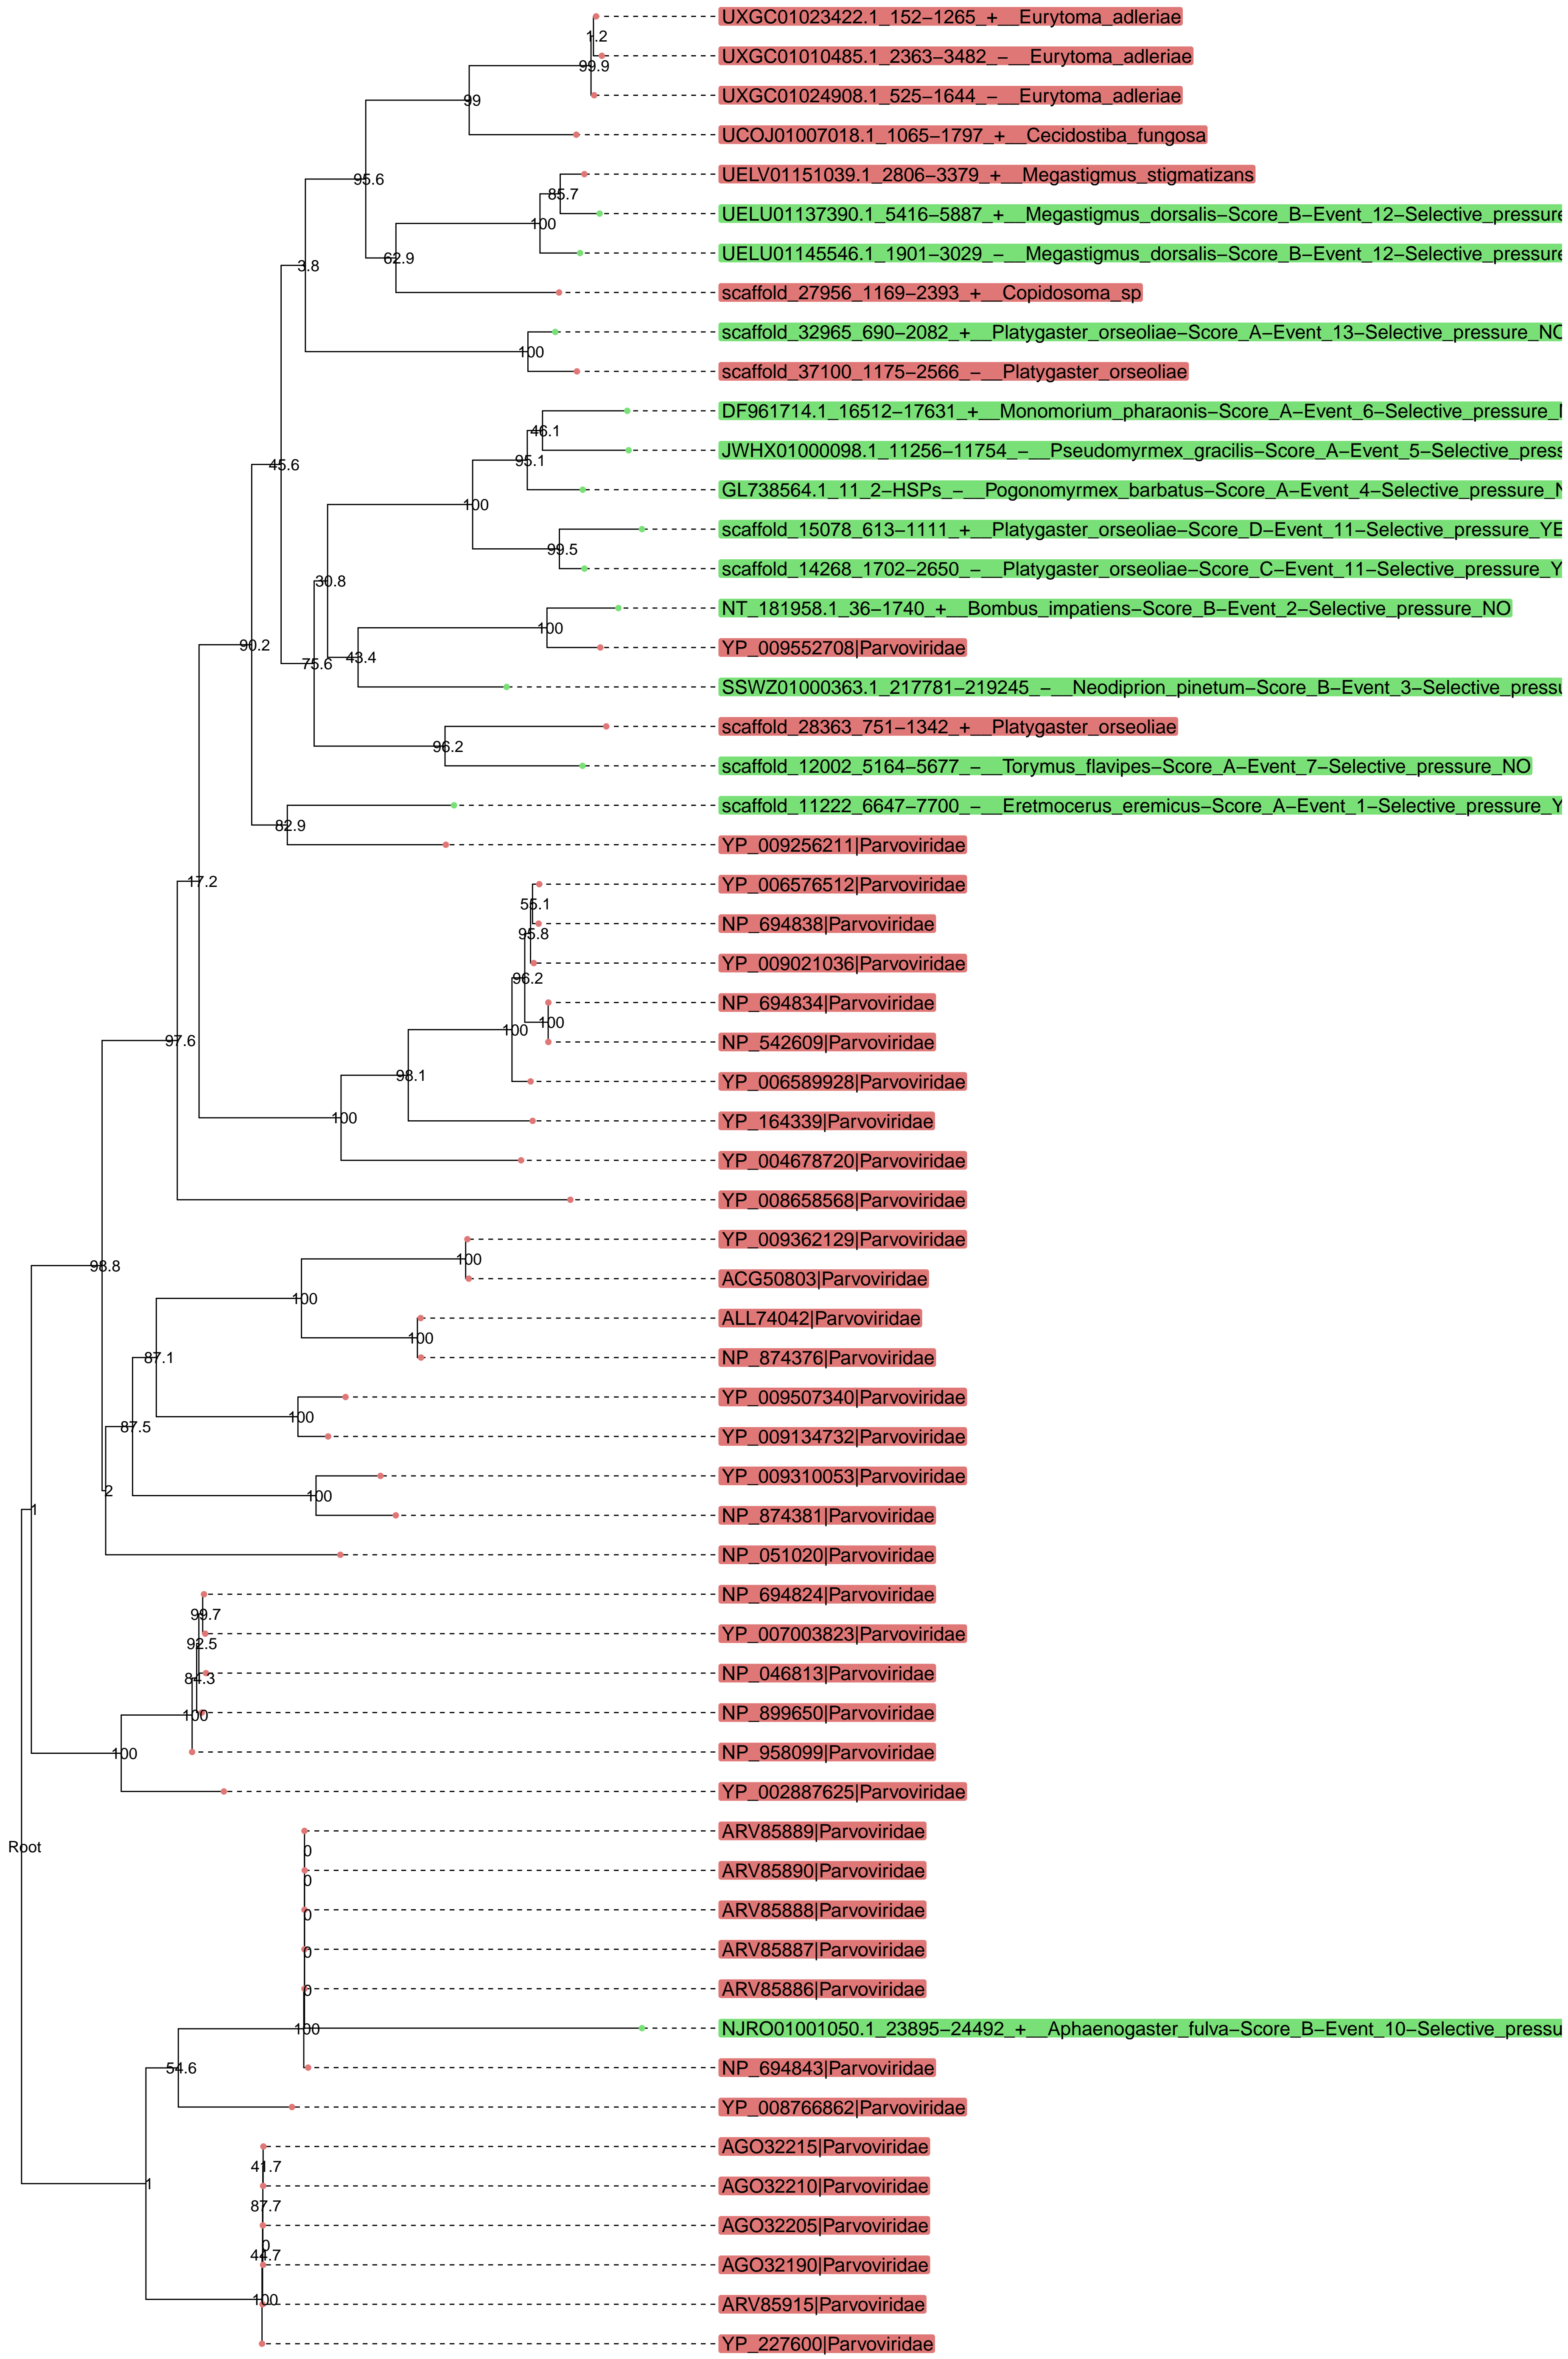

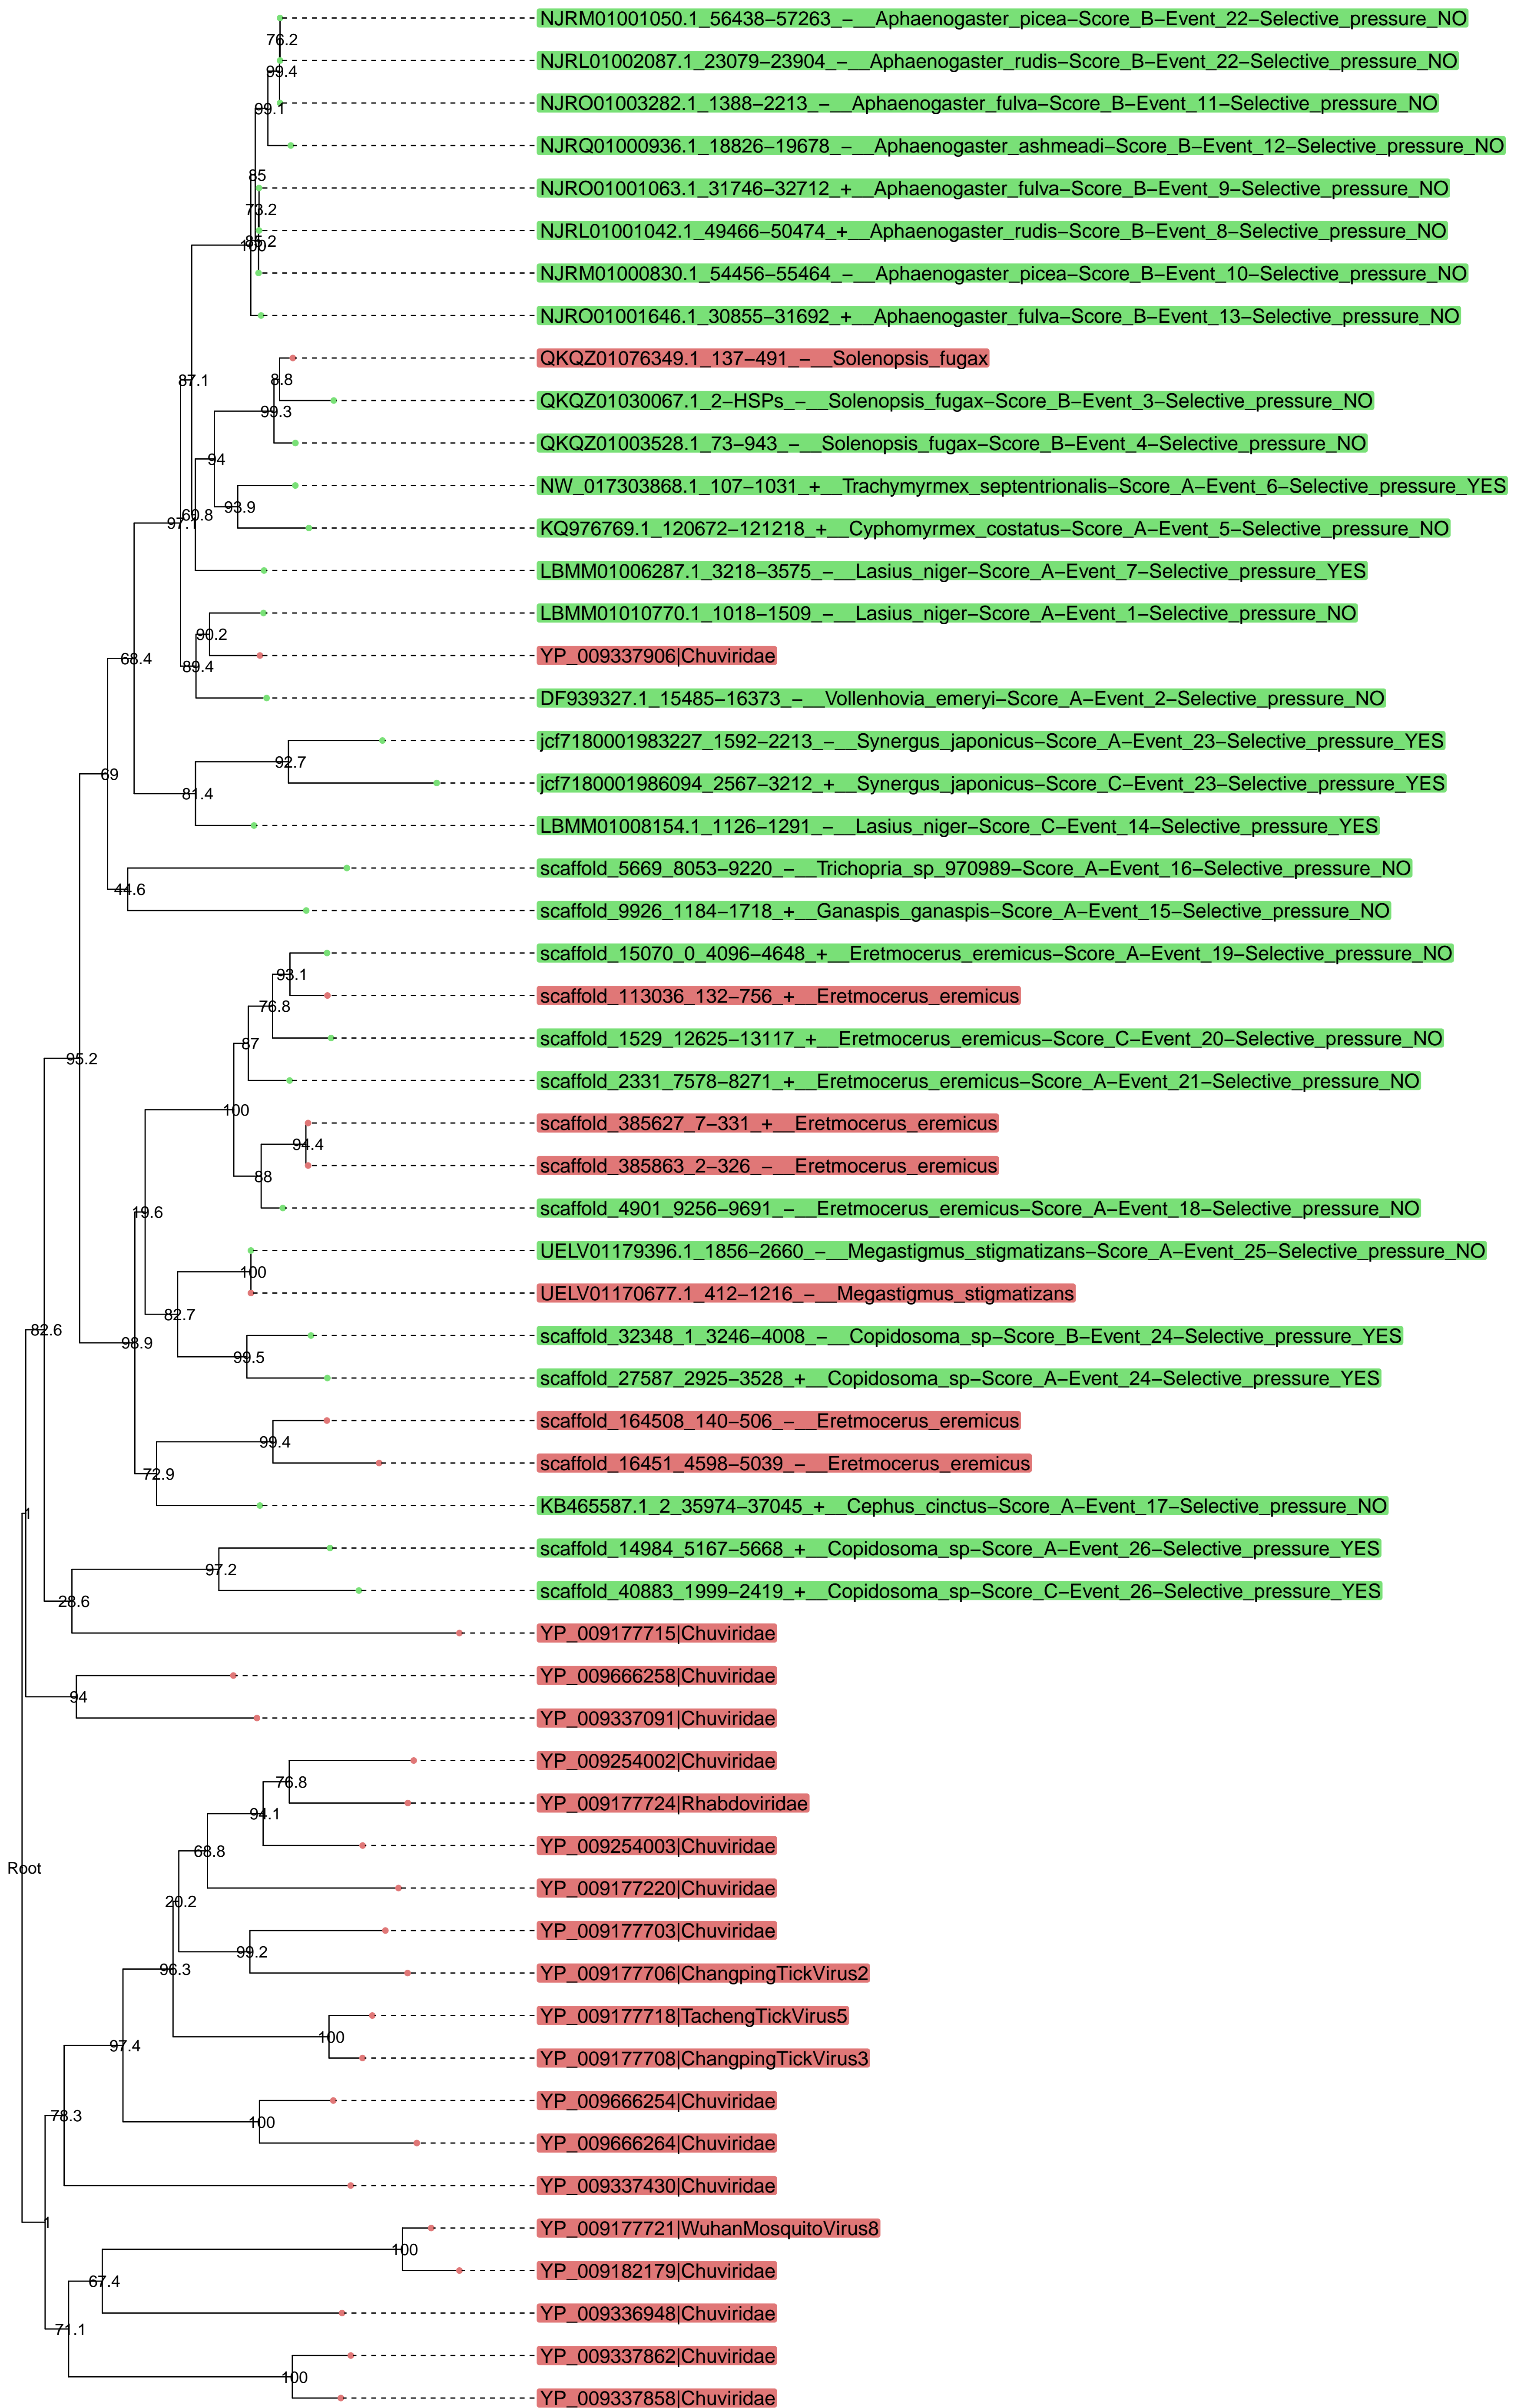



Cluster16096 – families involved : ['Poxviridae'] – putative protein : ['Viral late gene transcription factor 3']

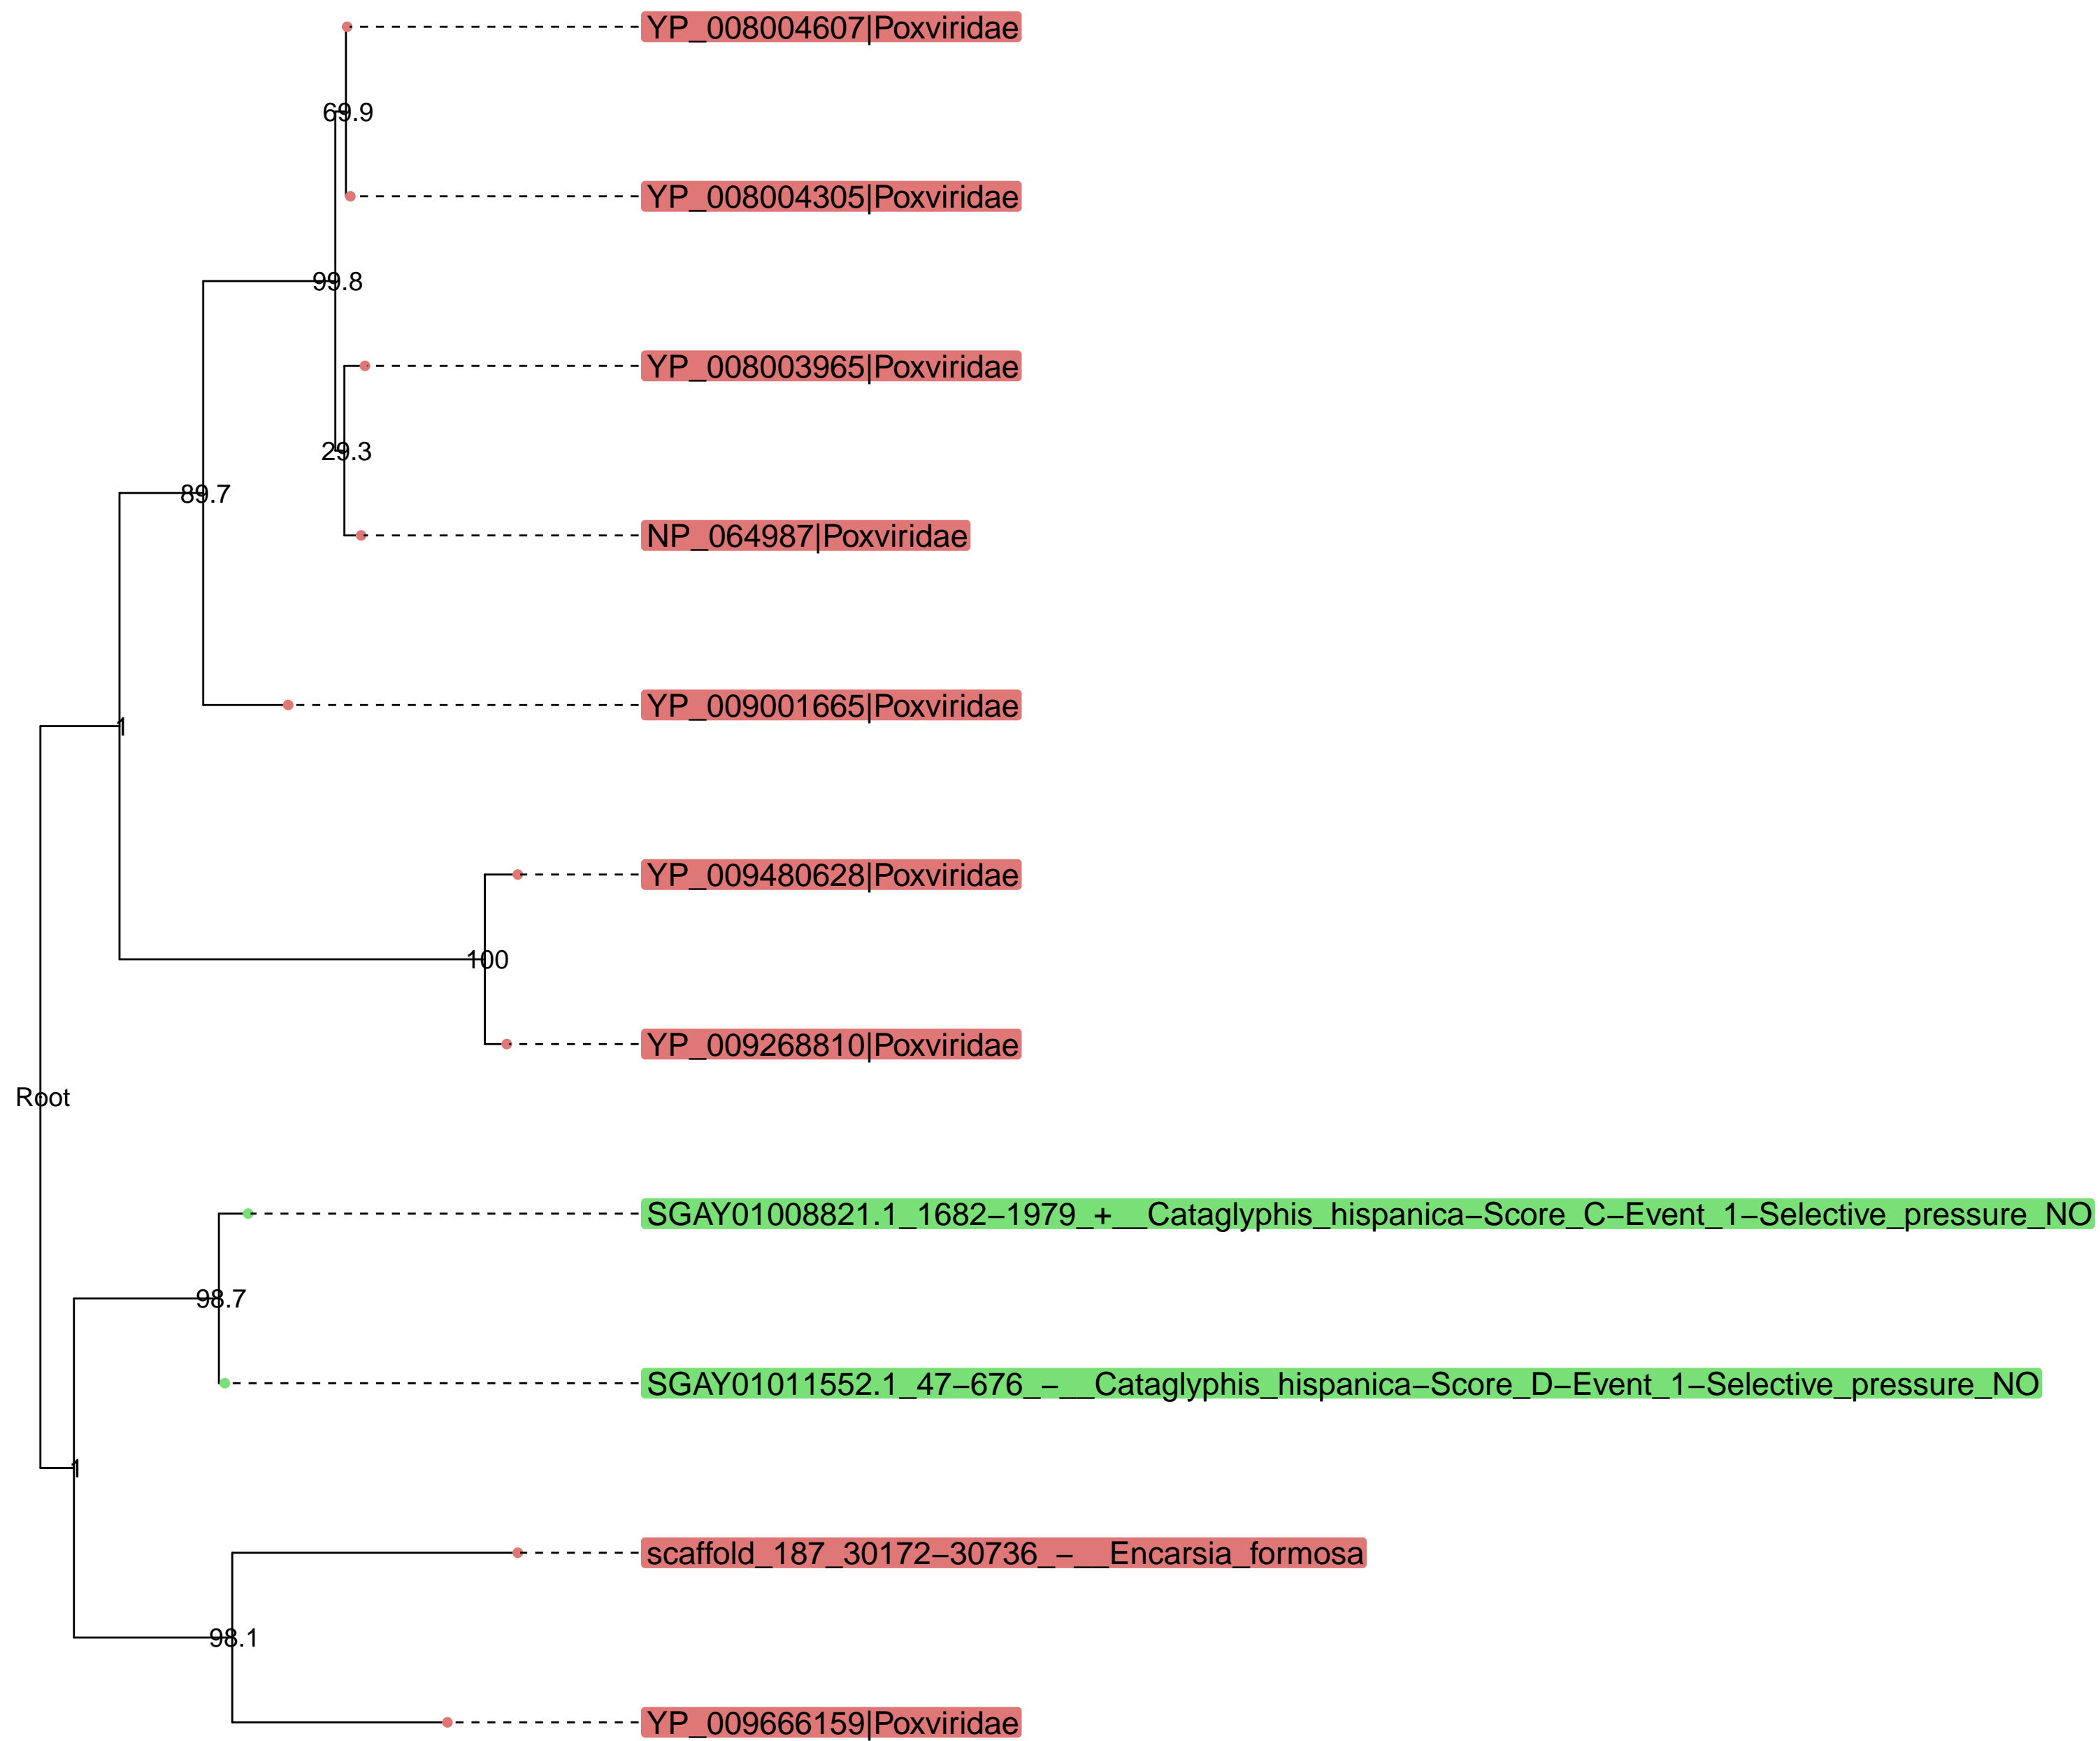

Cluster15833 – families involved : ['Nimaviridae'] – putative protein : ['ORF1211']

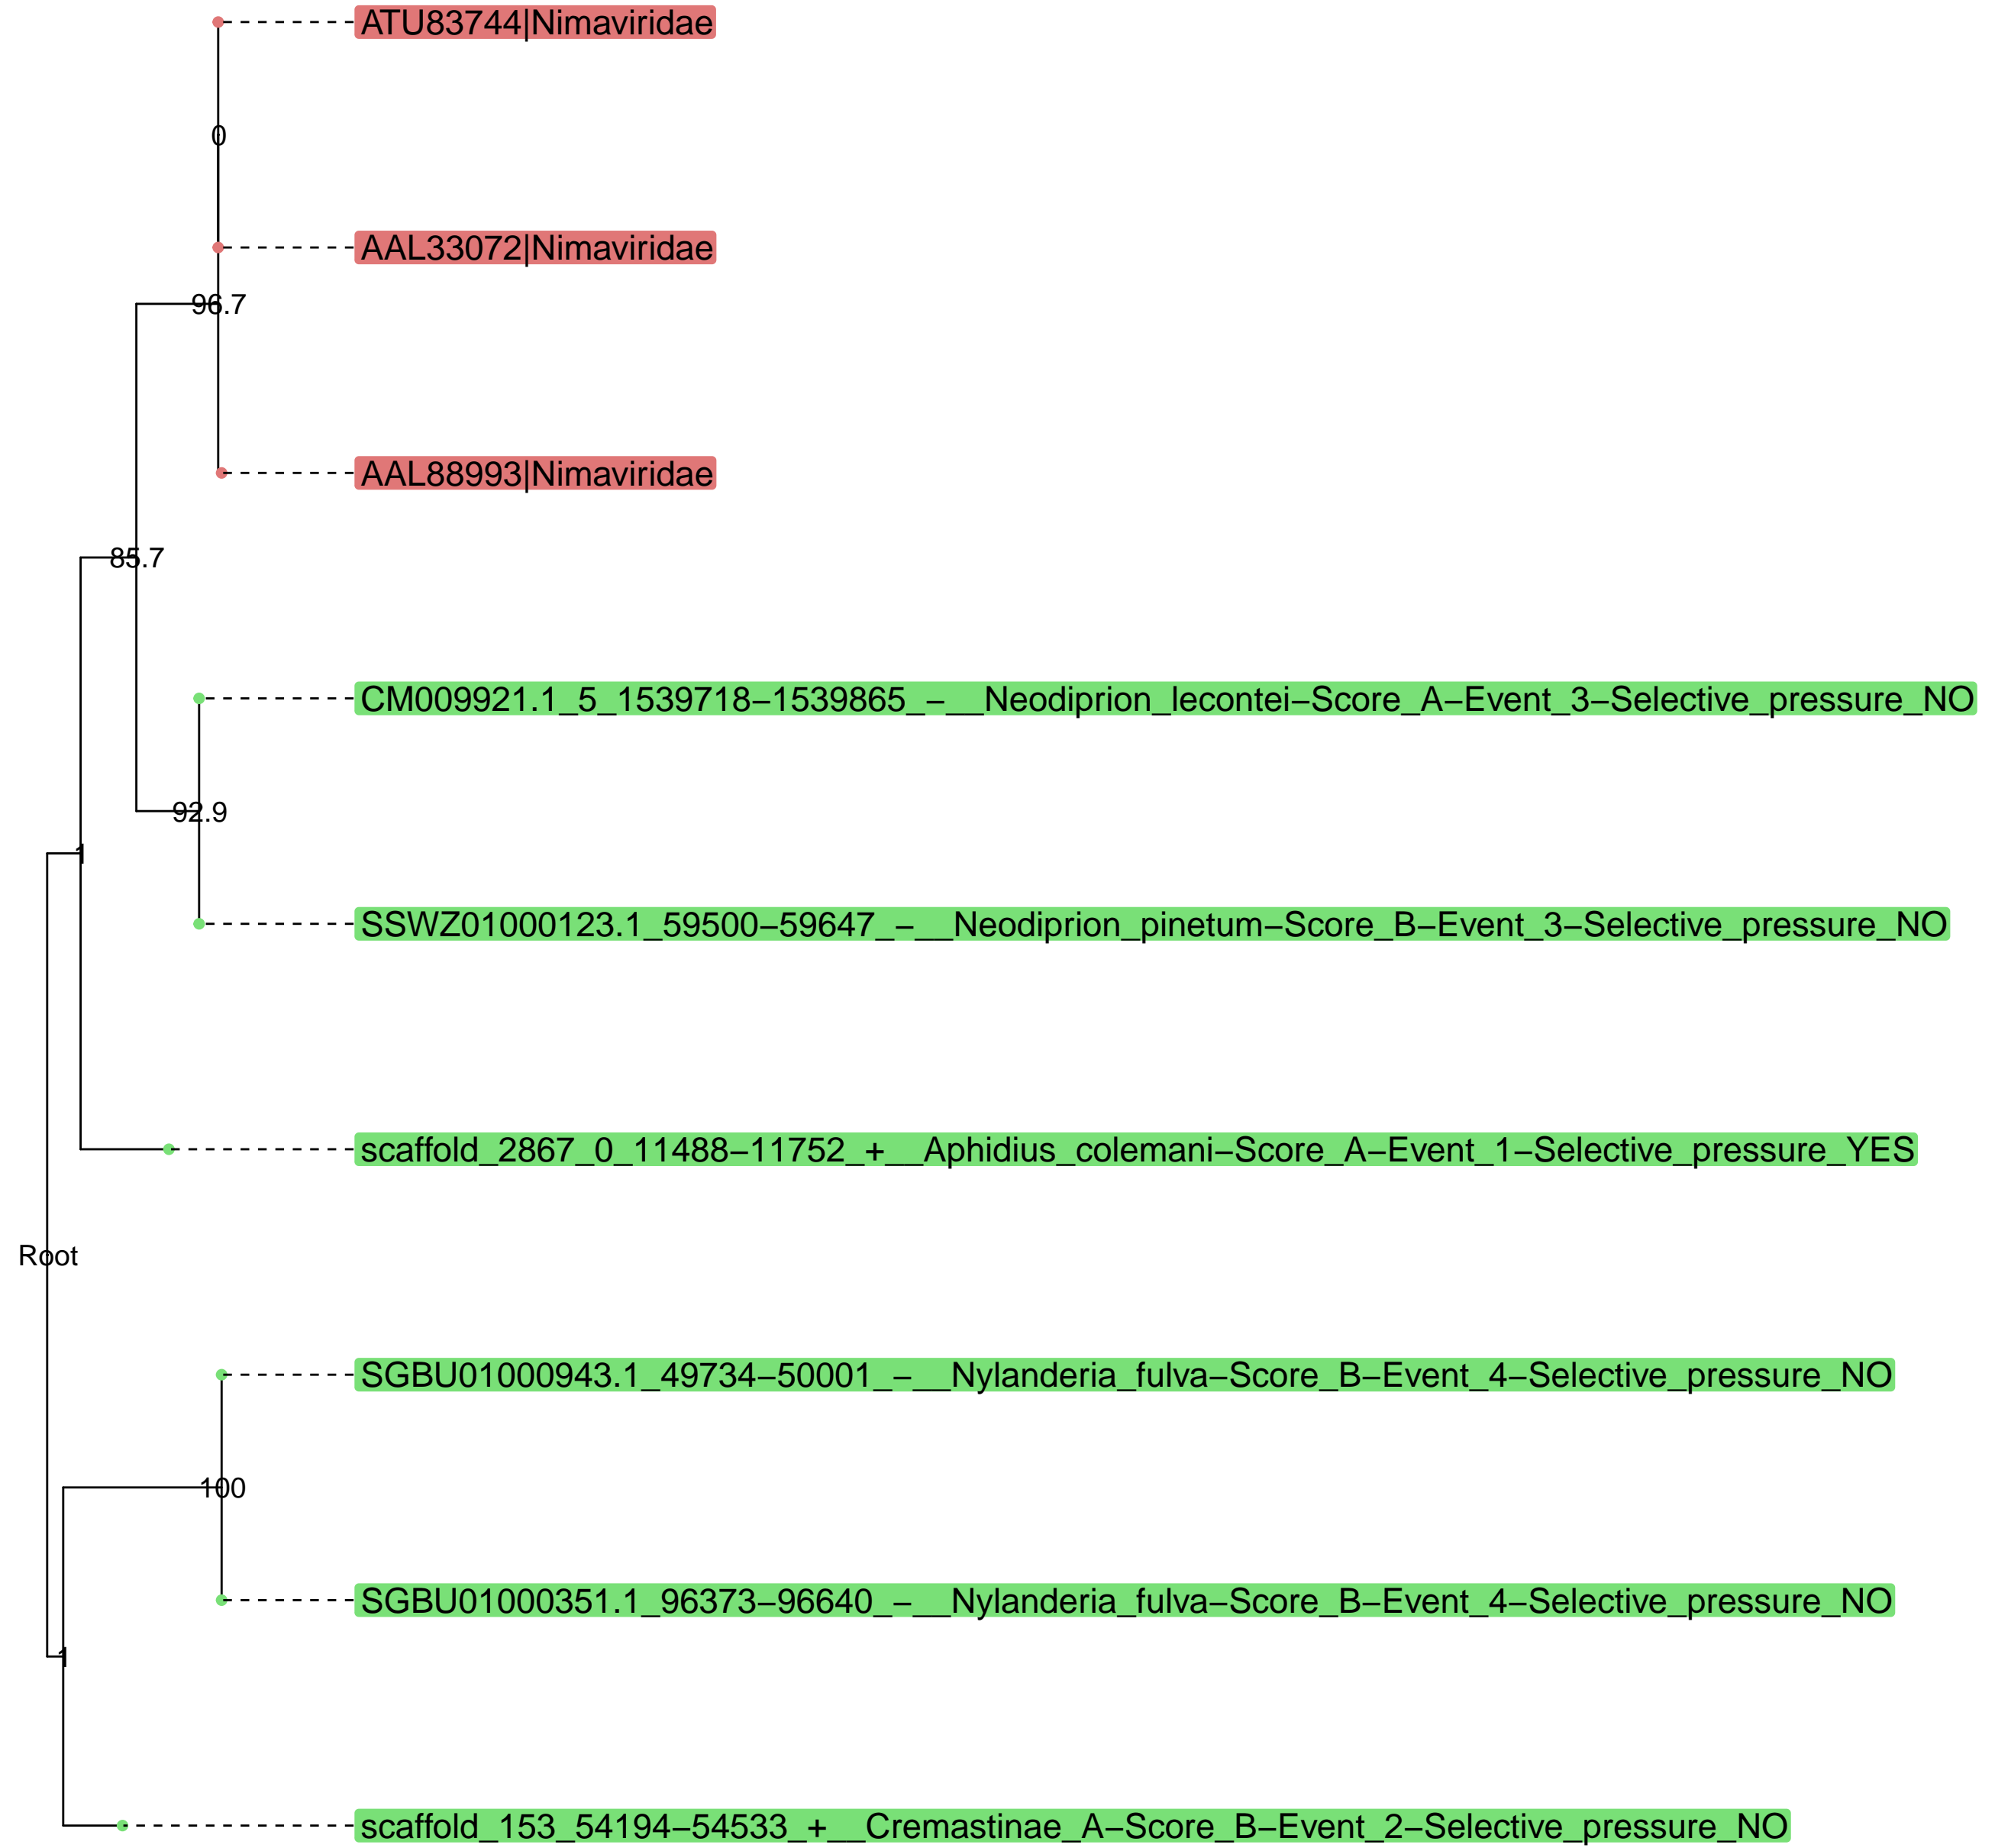

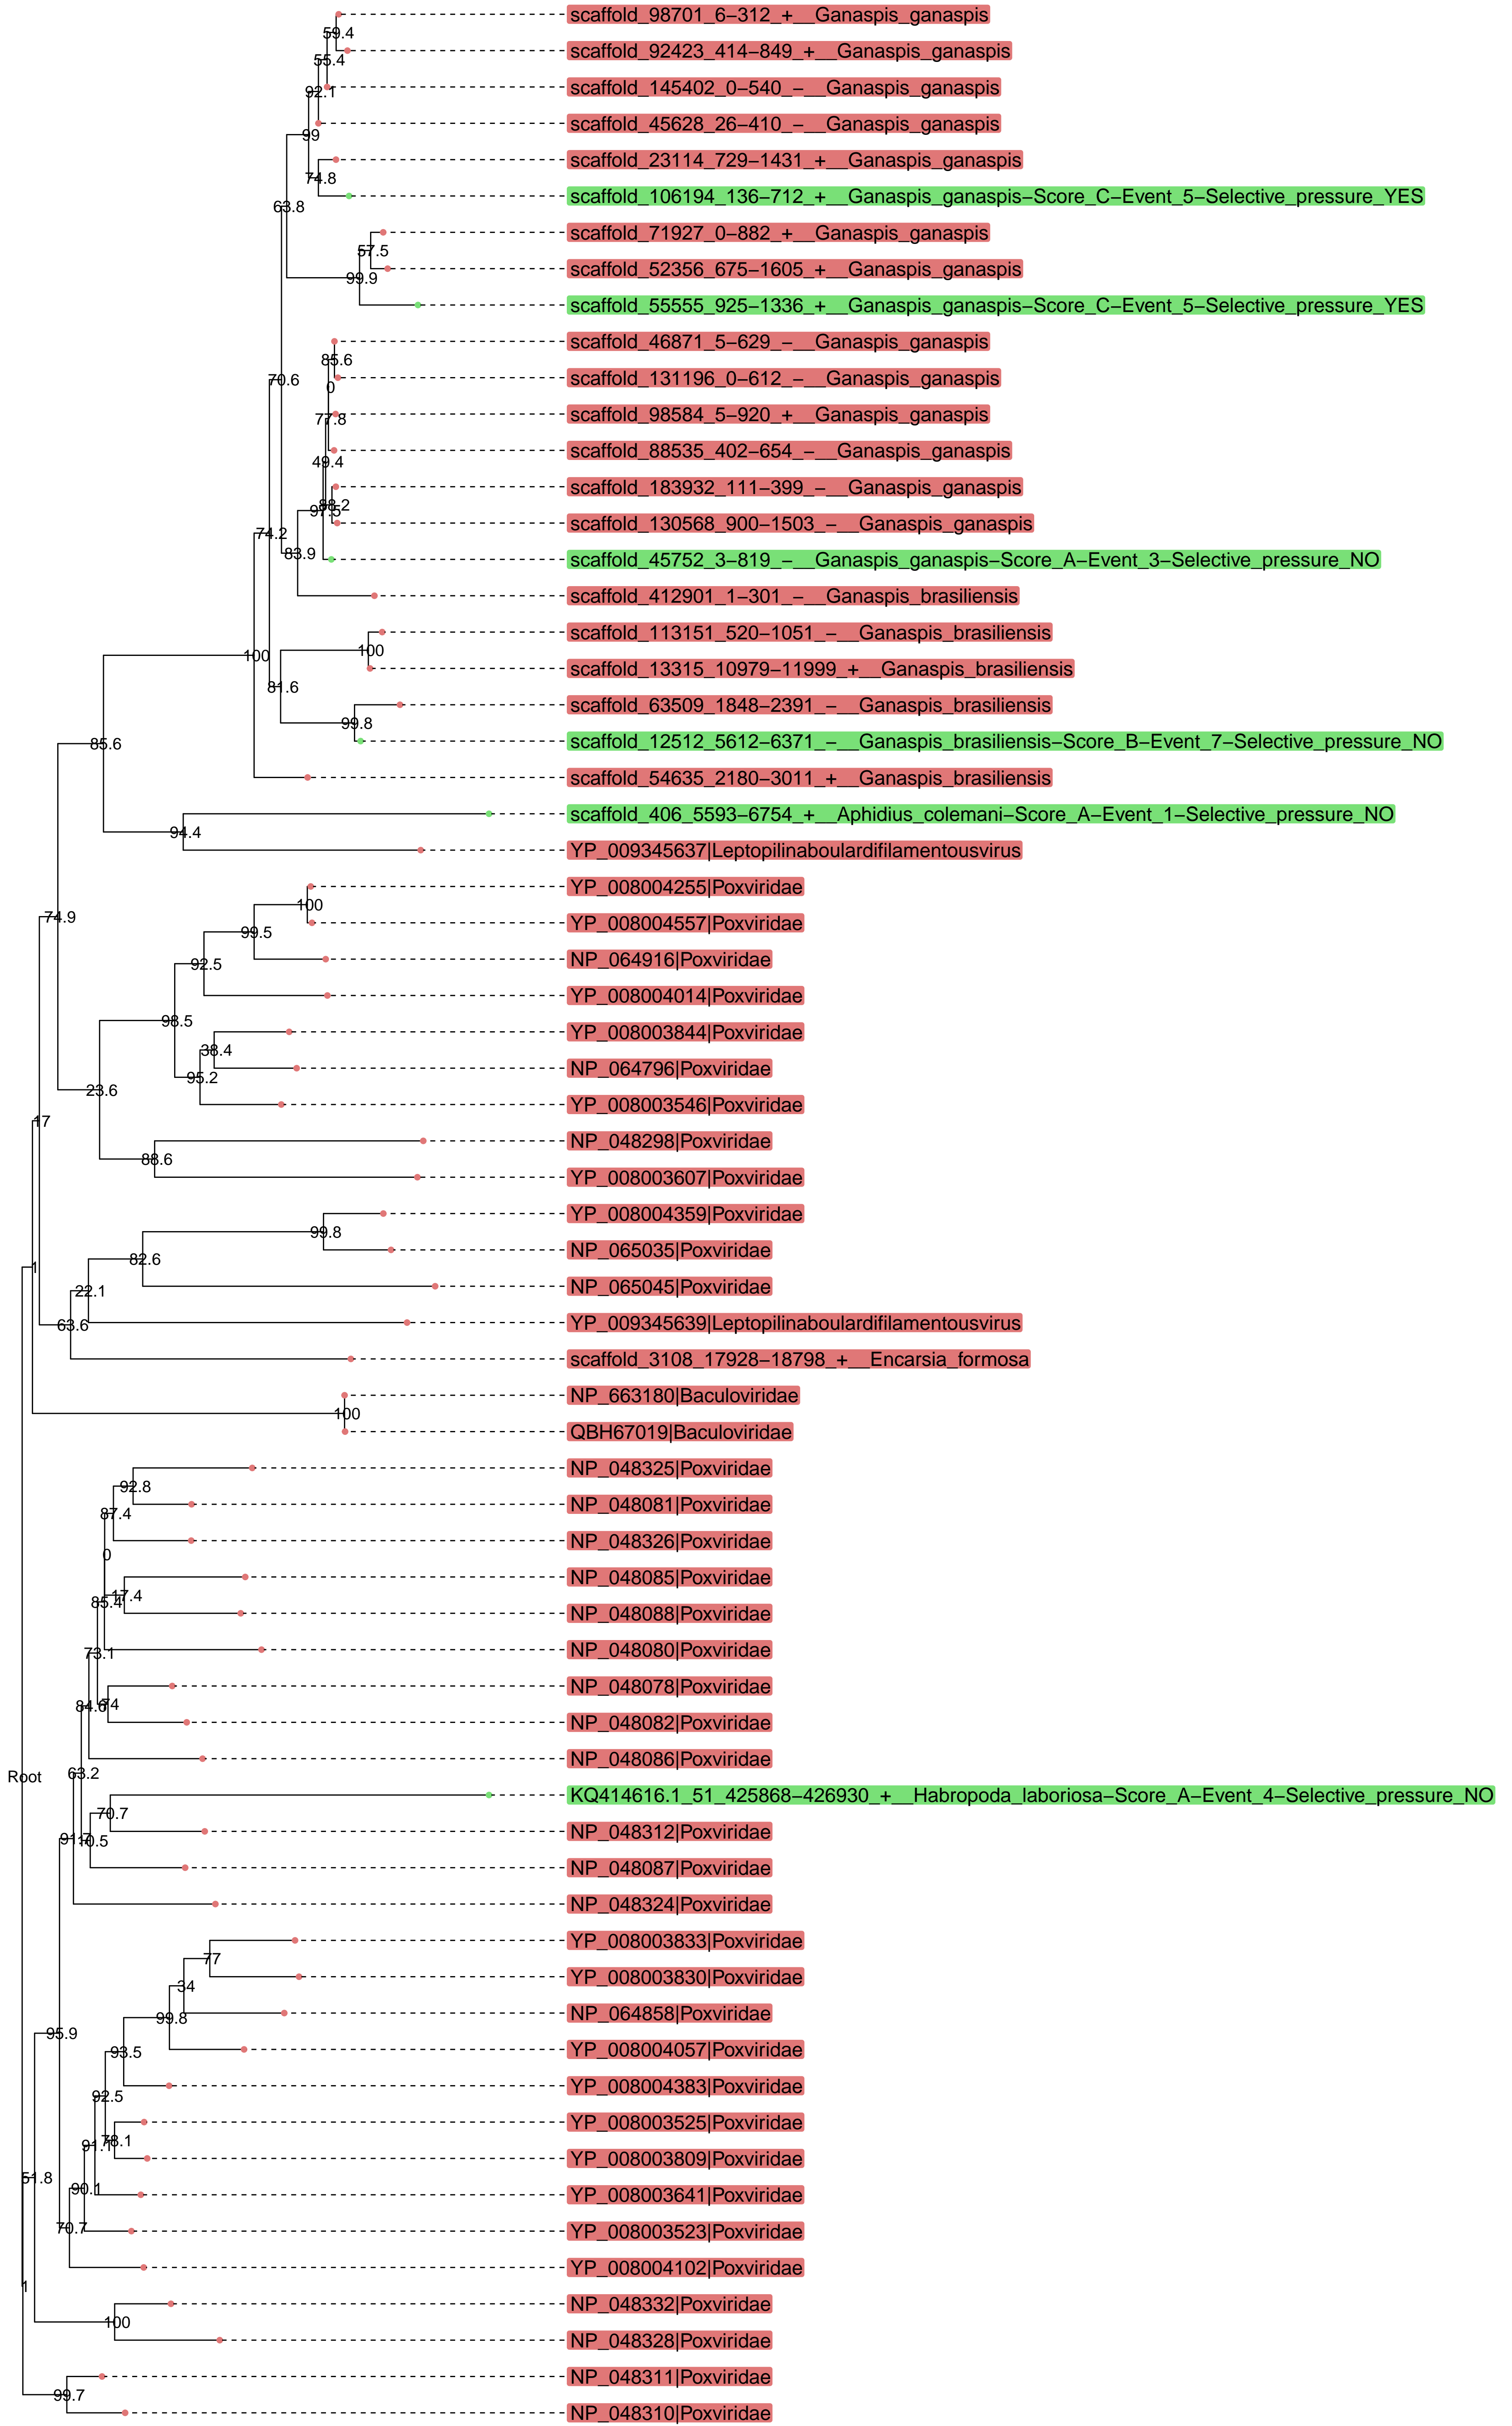

Root

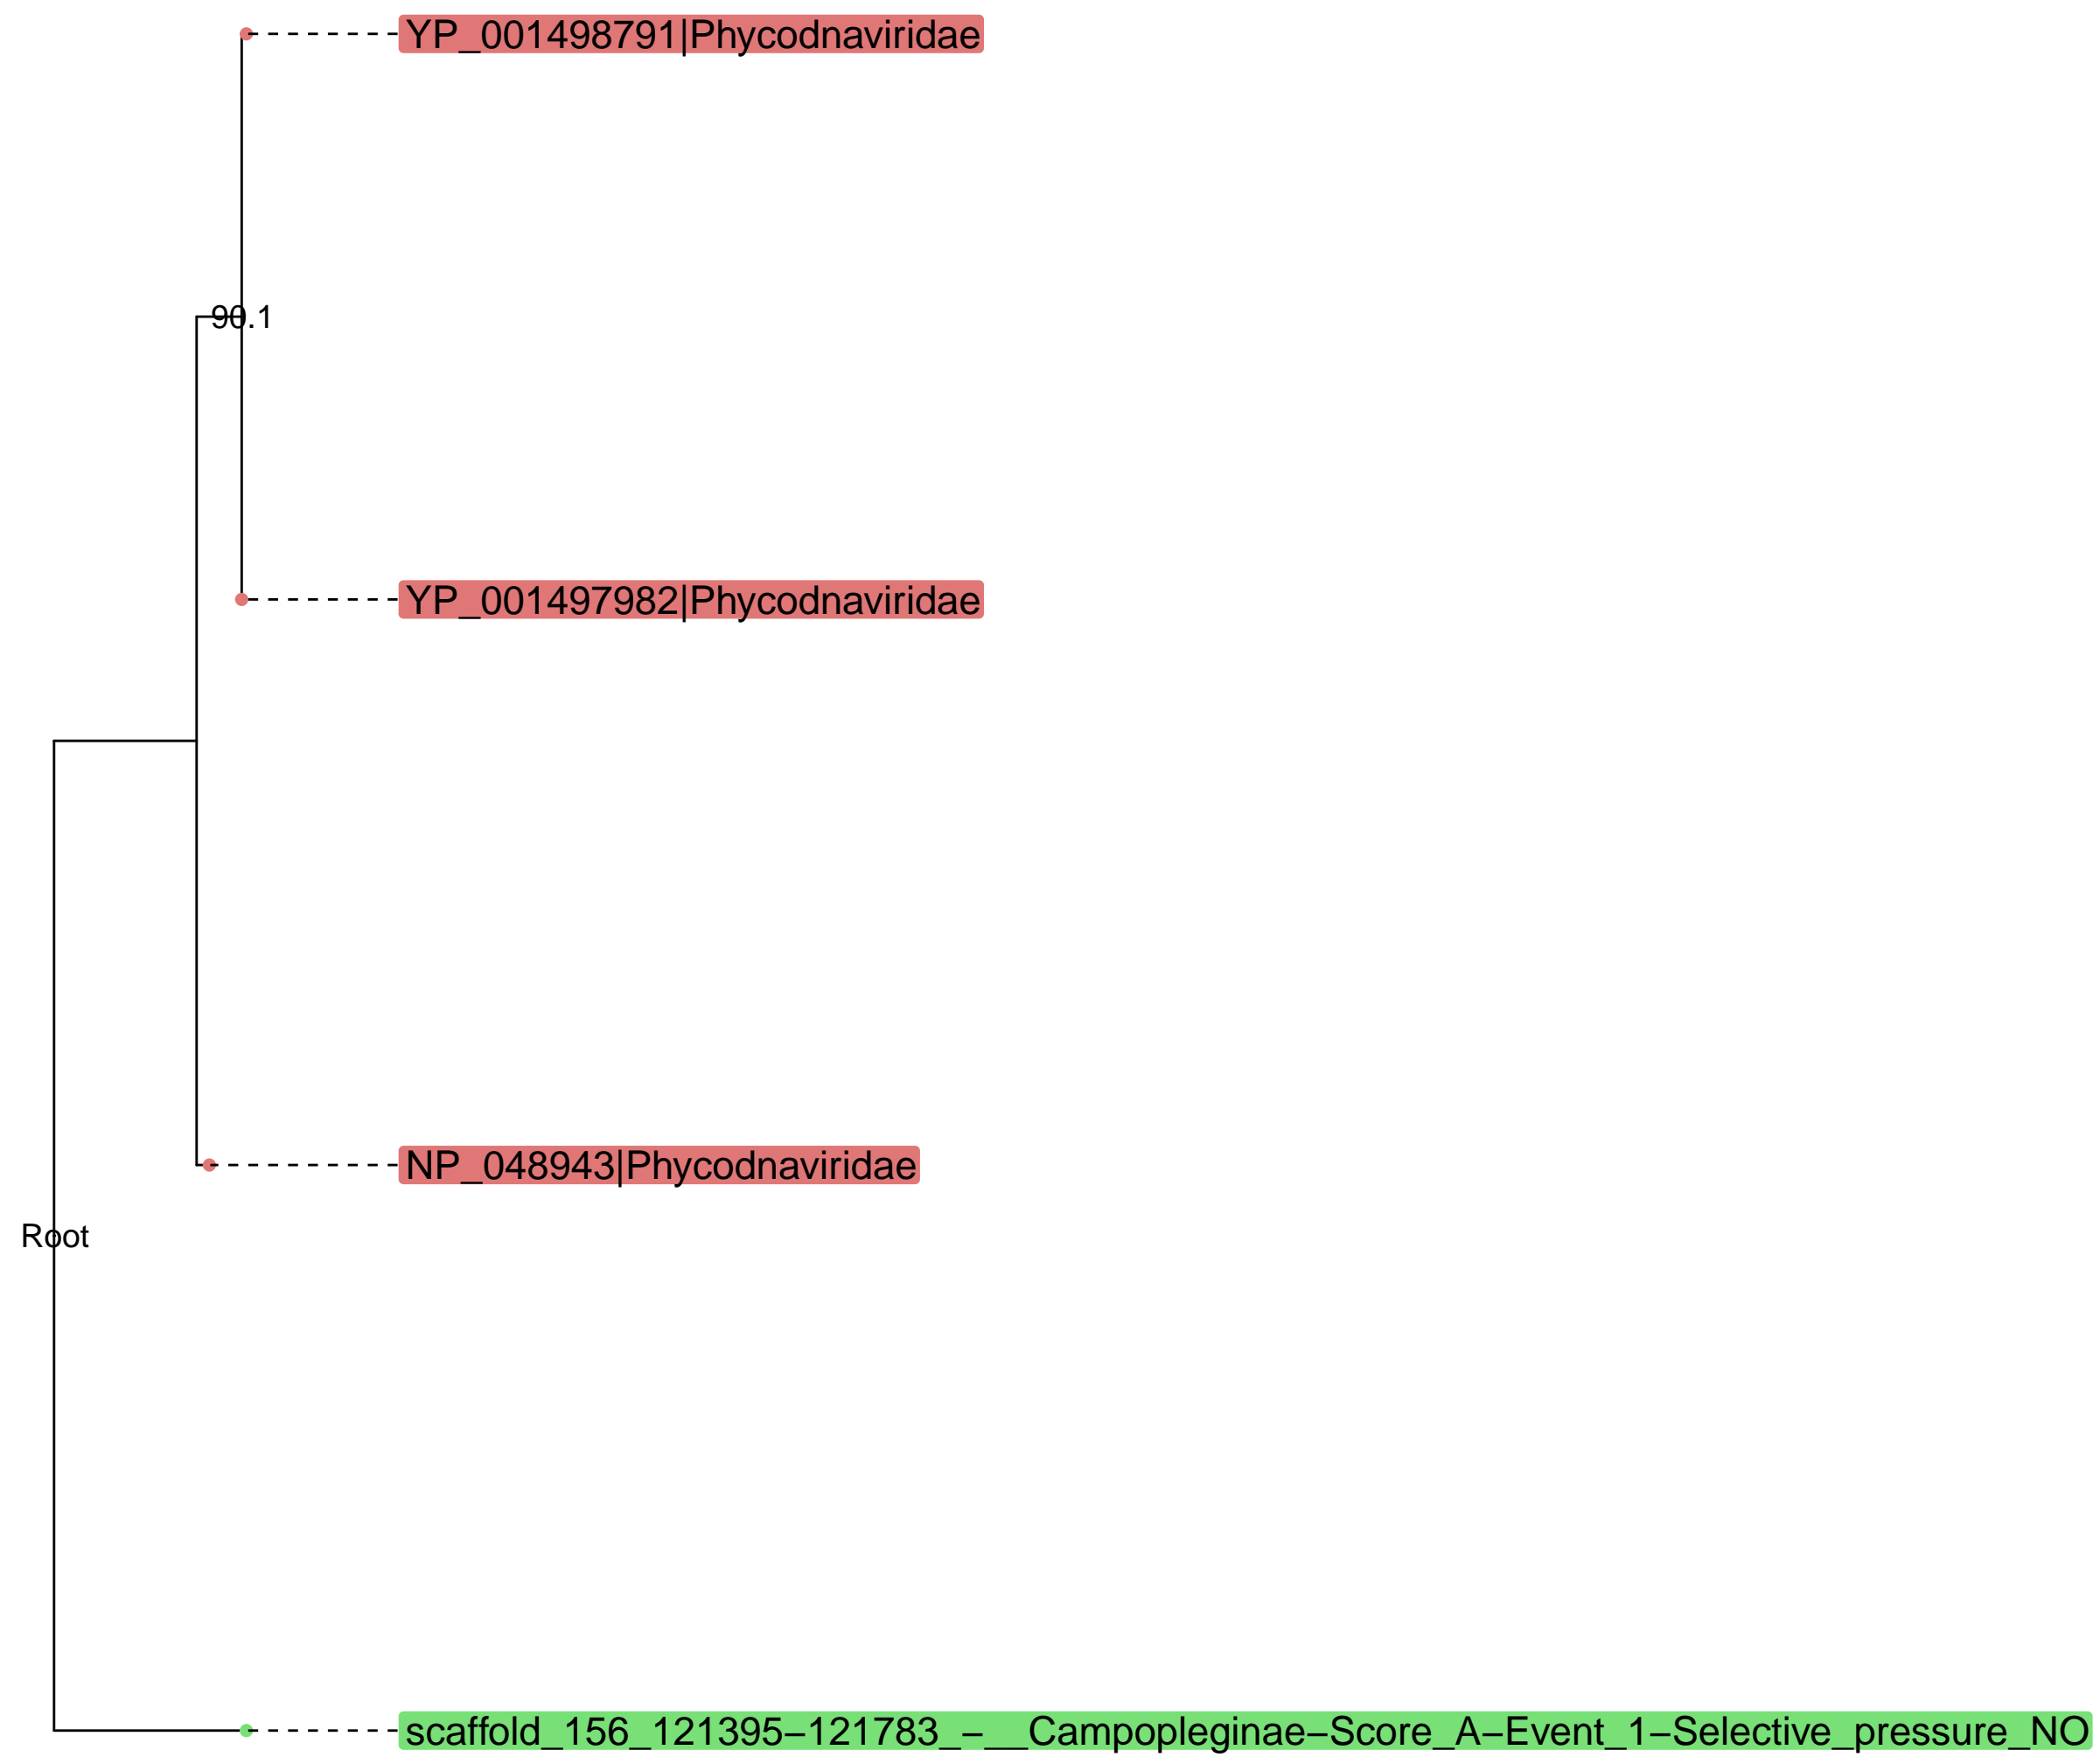

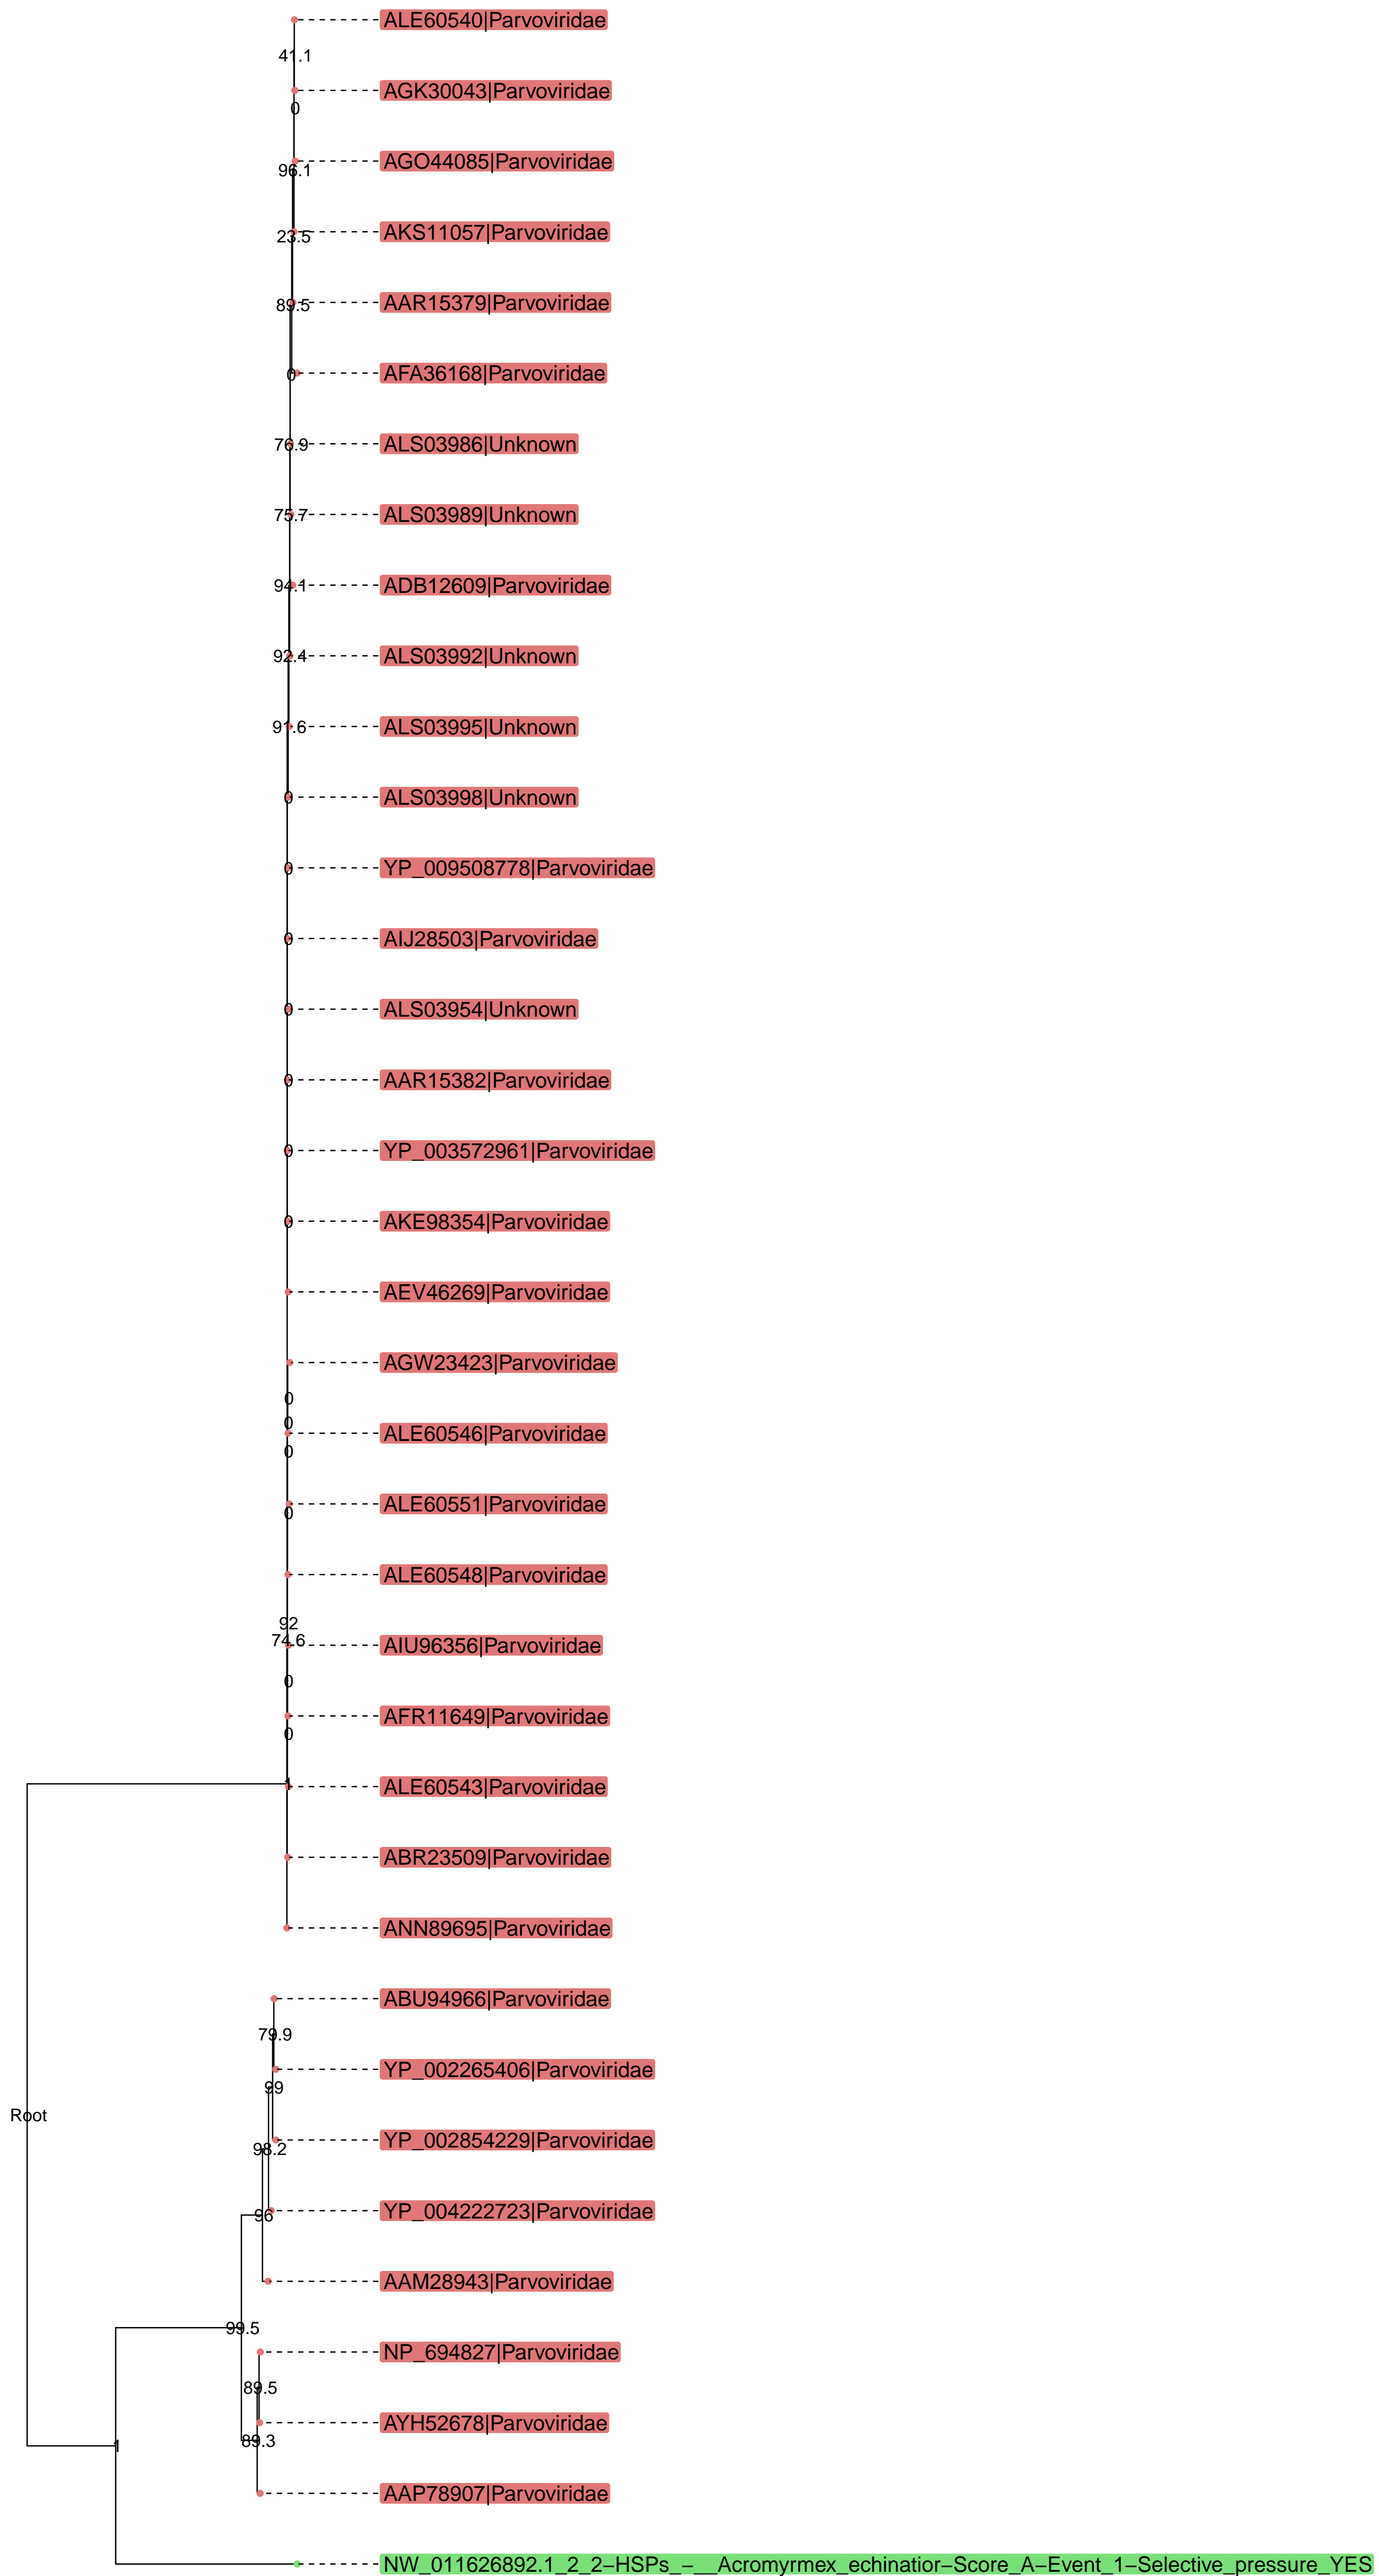

Cluster5853 – families involved : ['Nudiviridae'] – putative protein : ['GrBNV\_gp72-like protein']

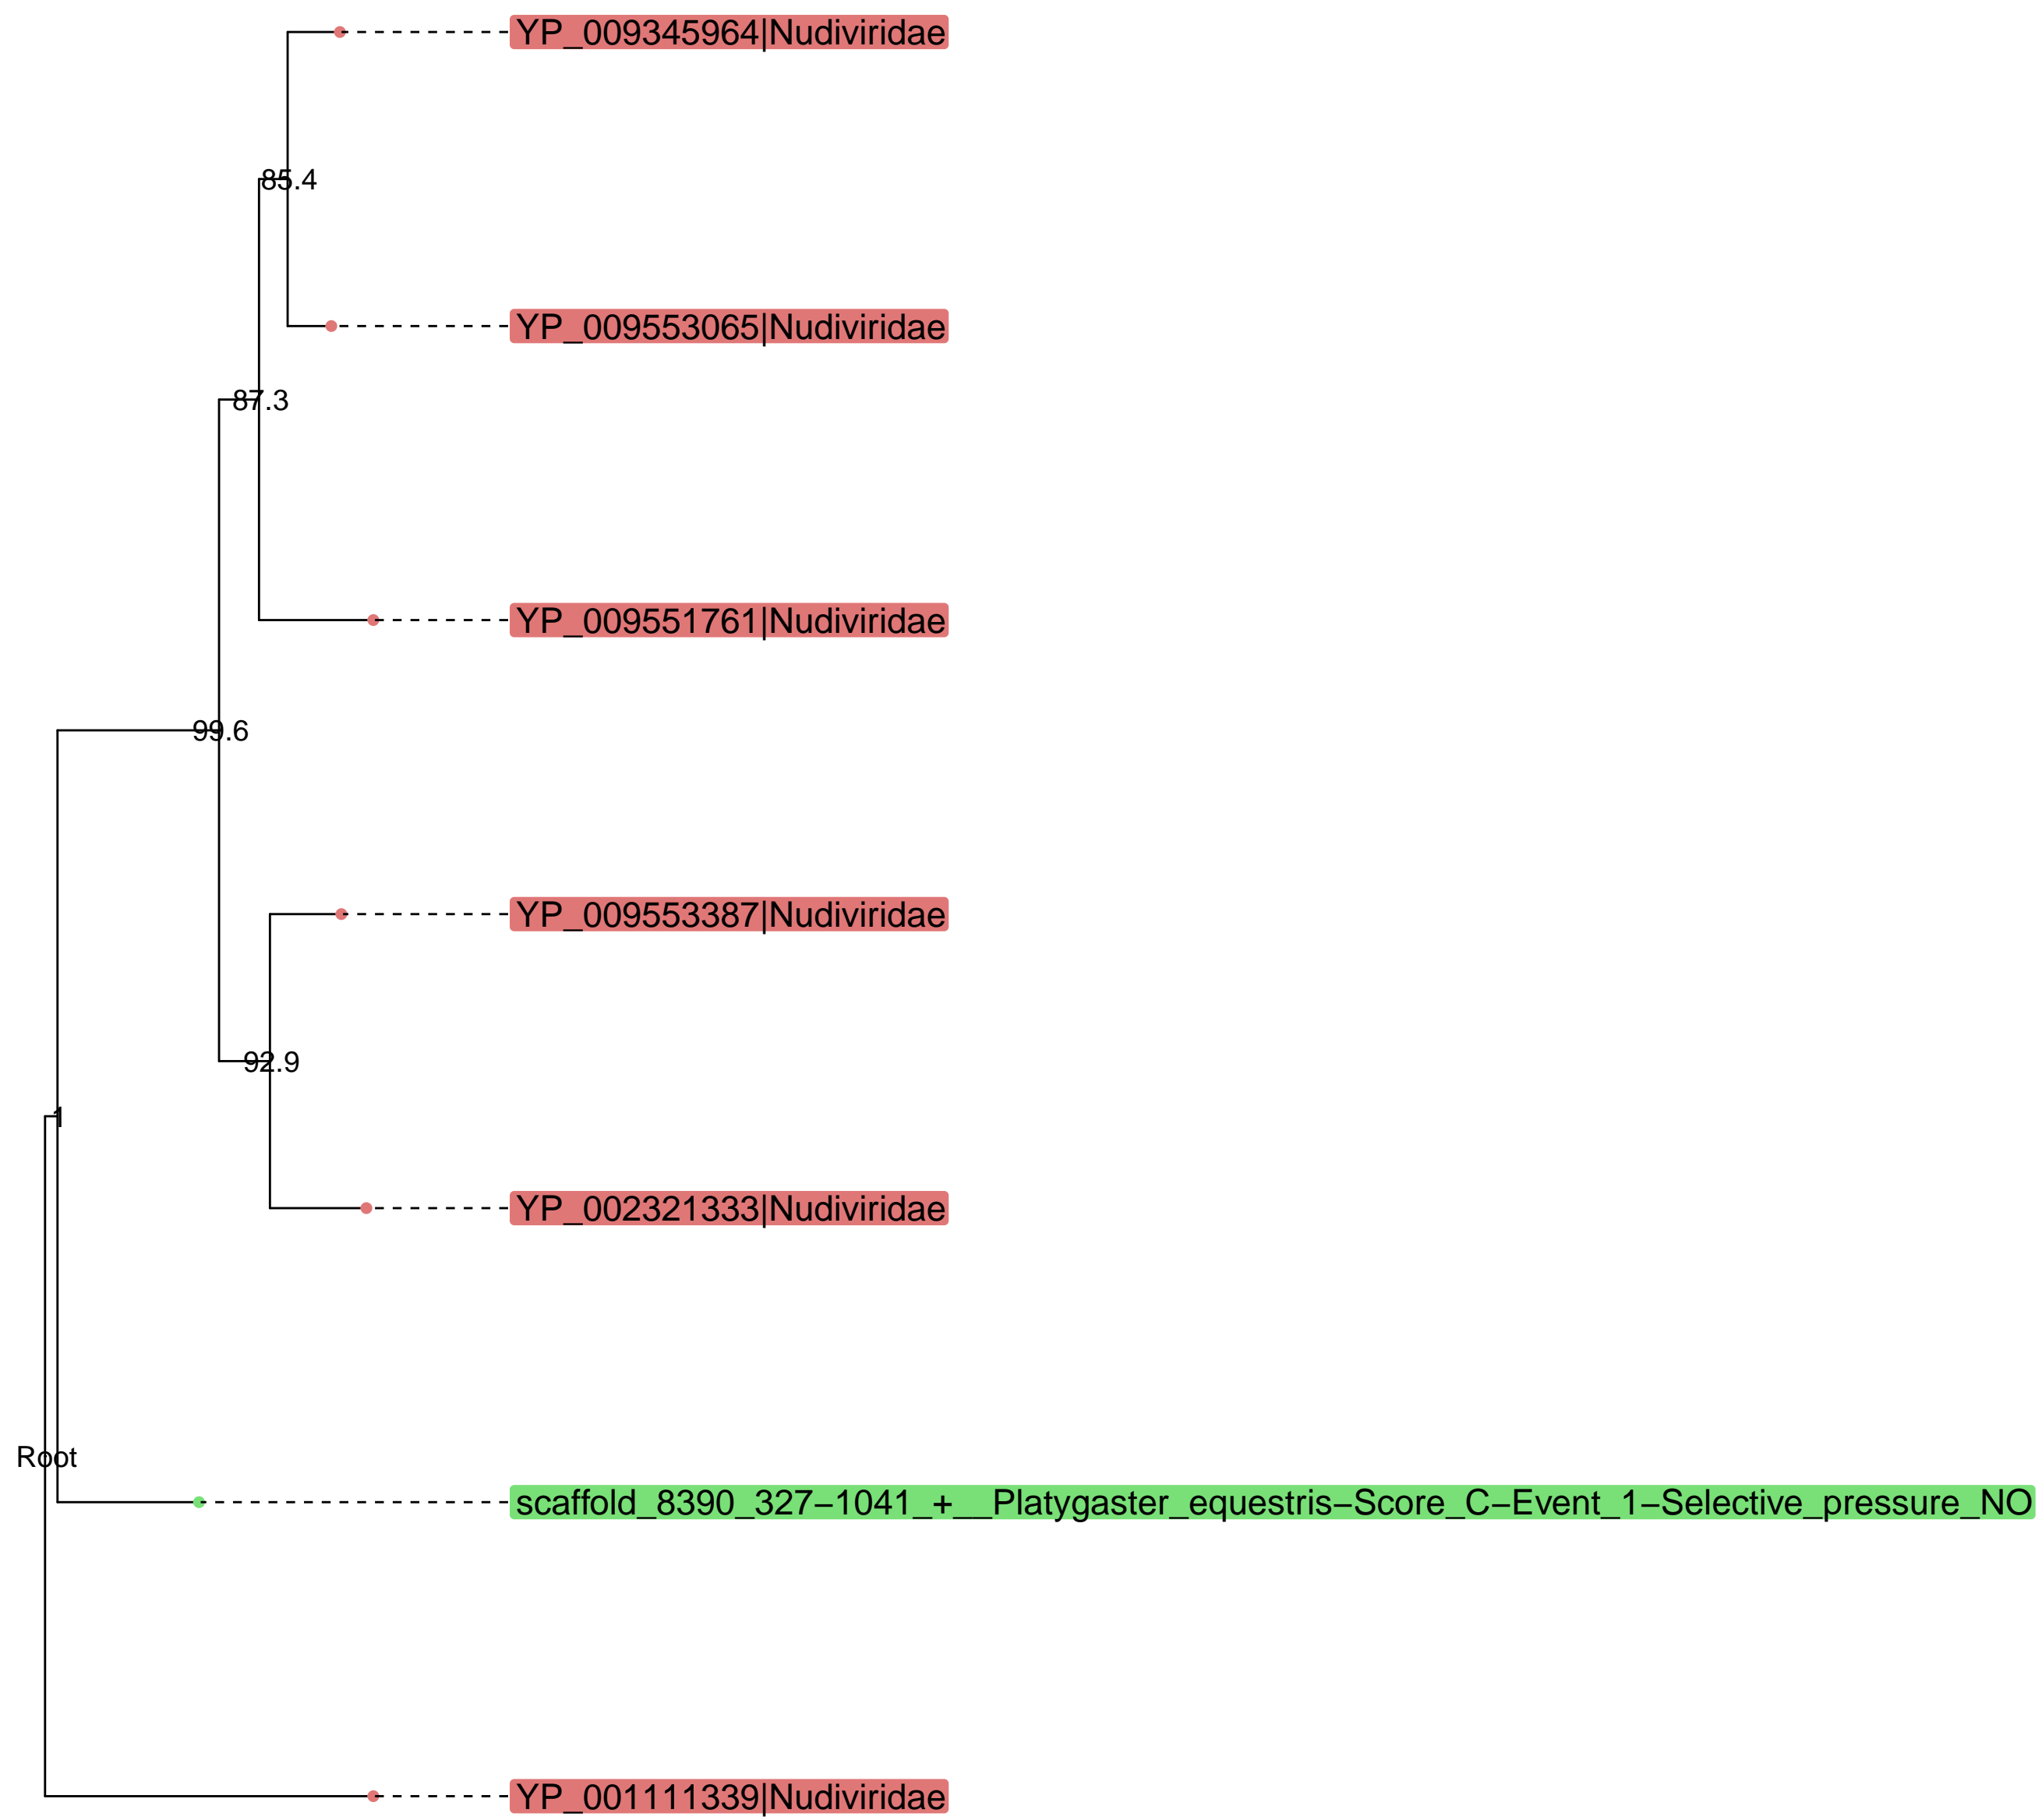

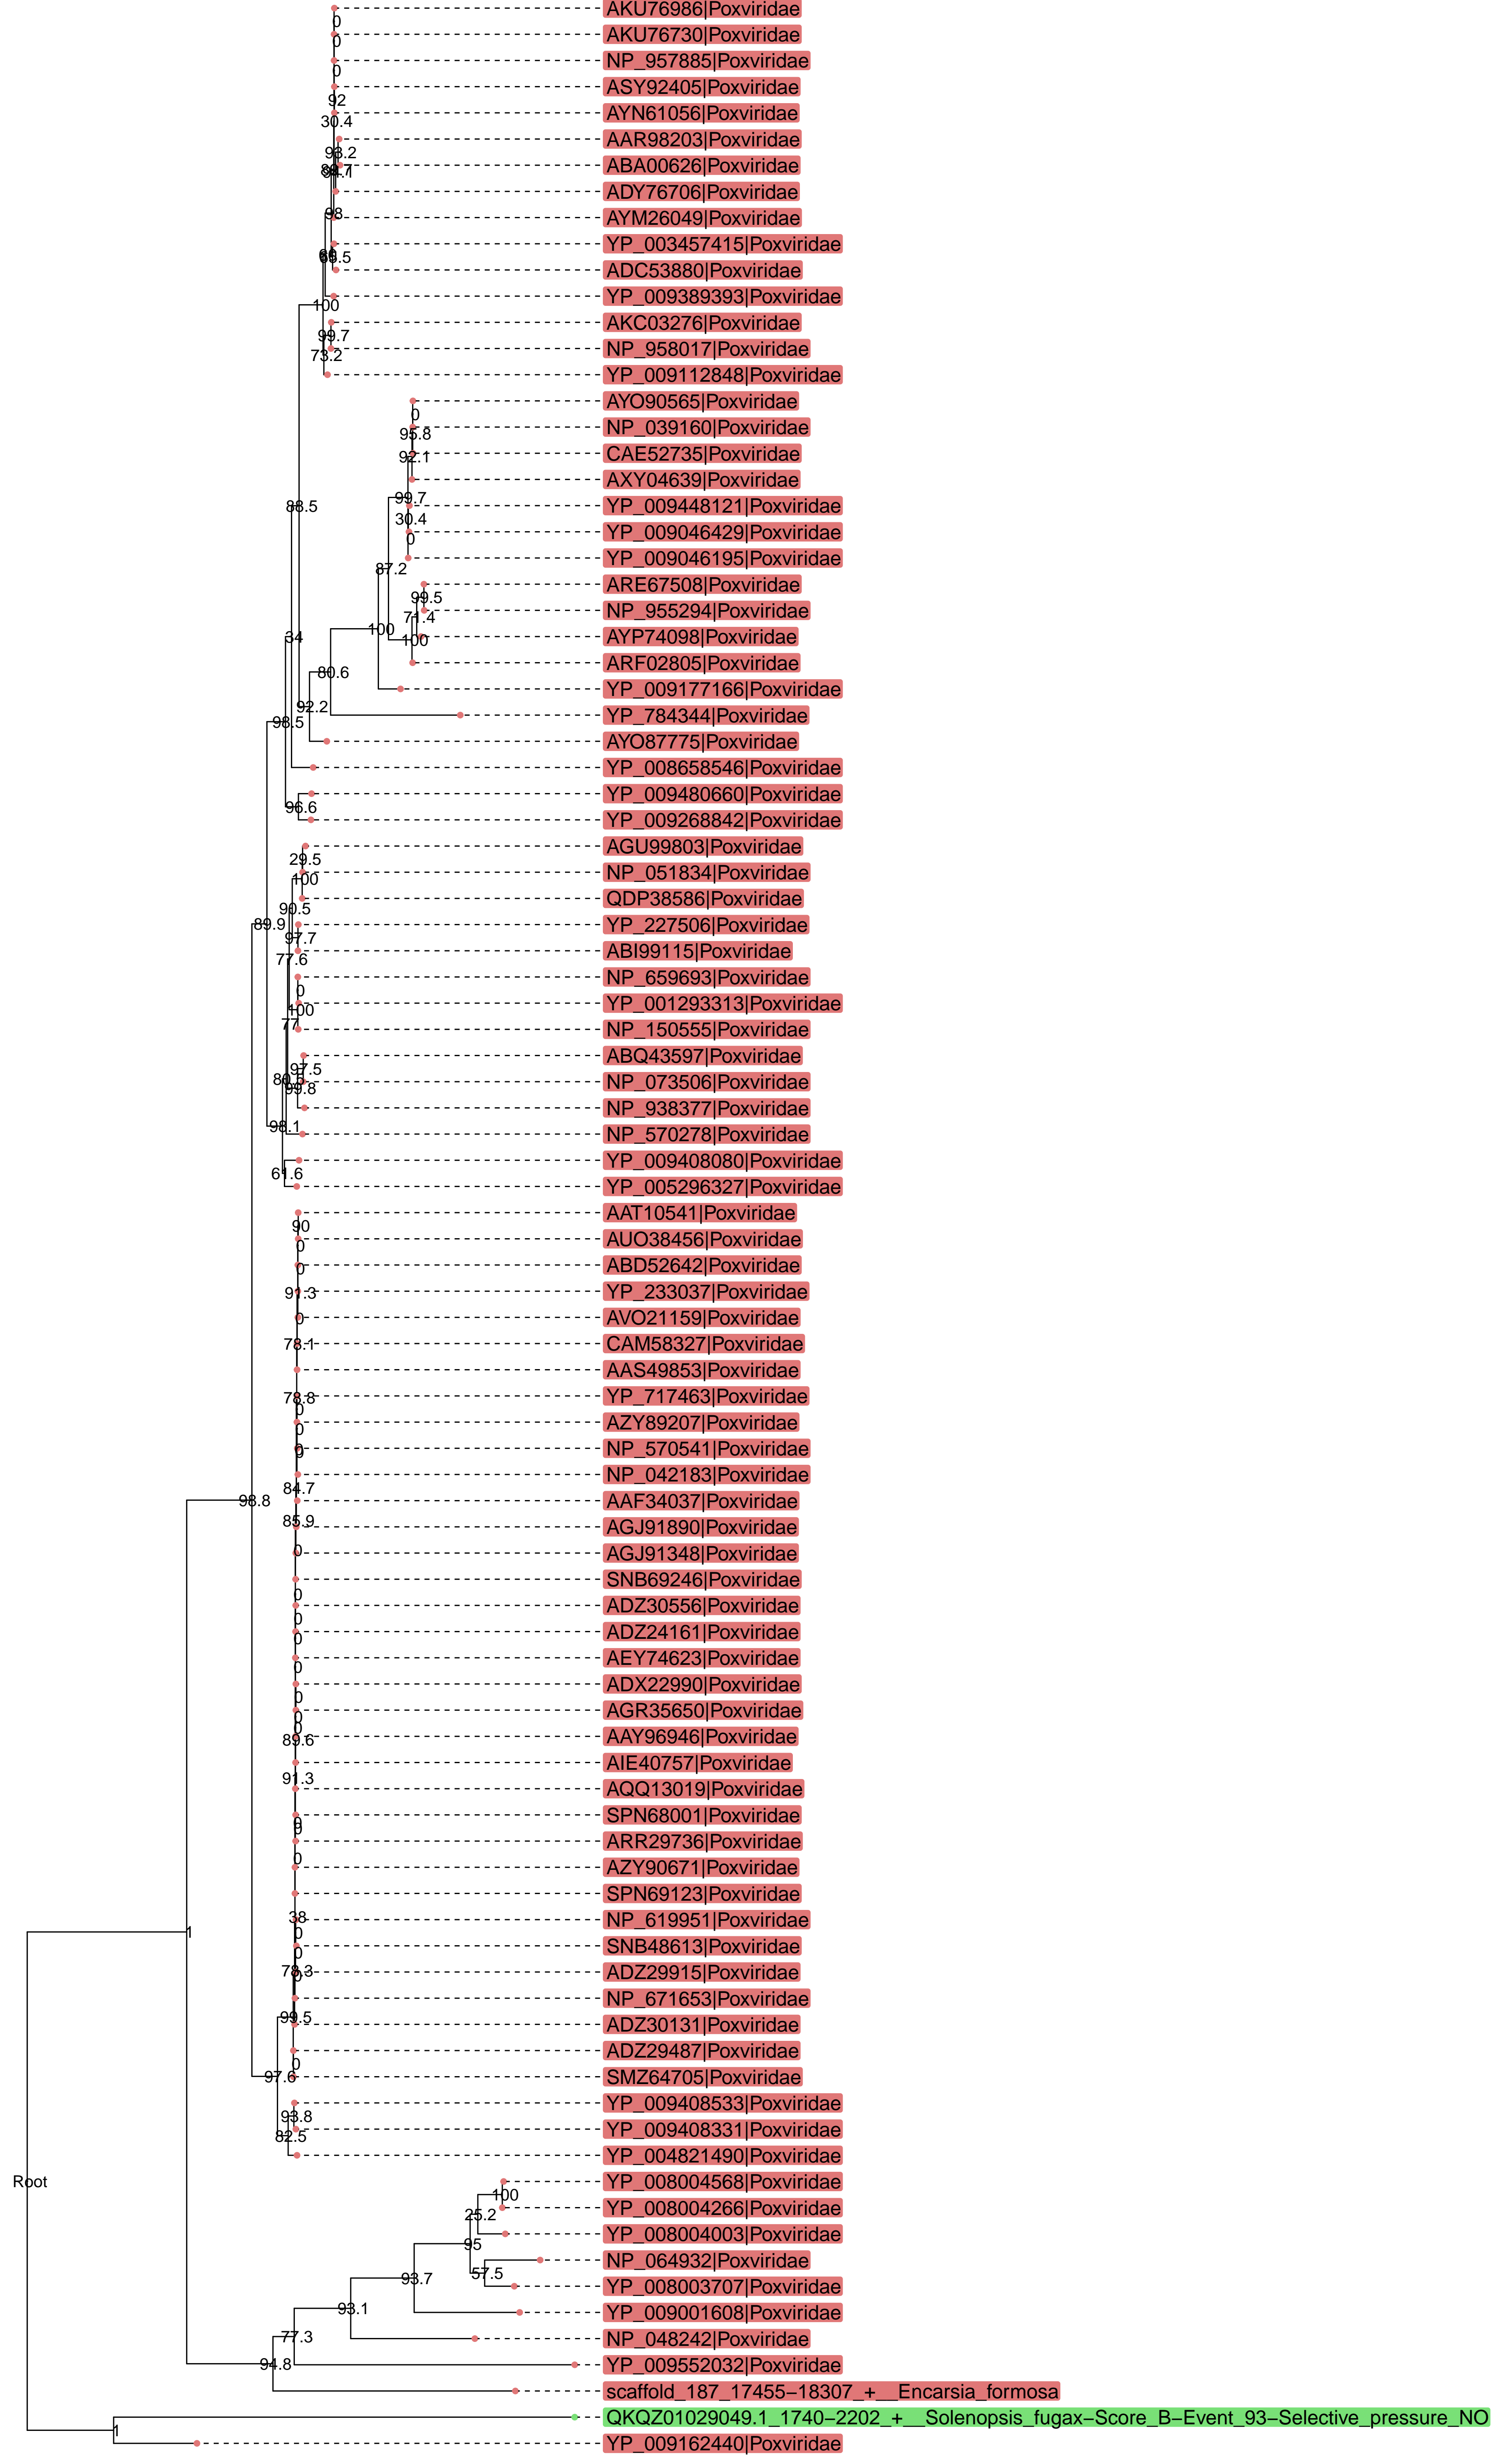

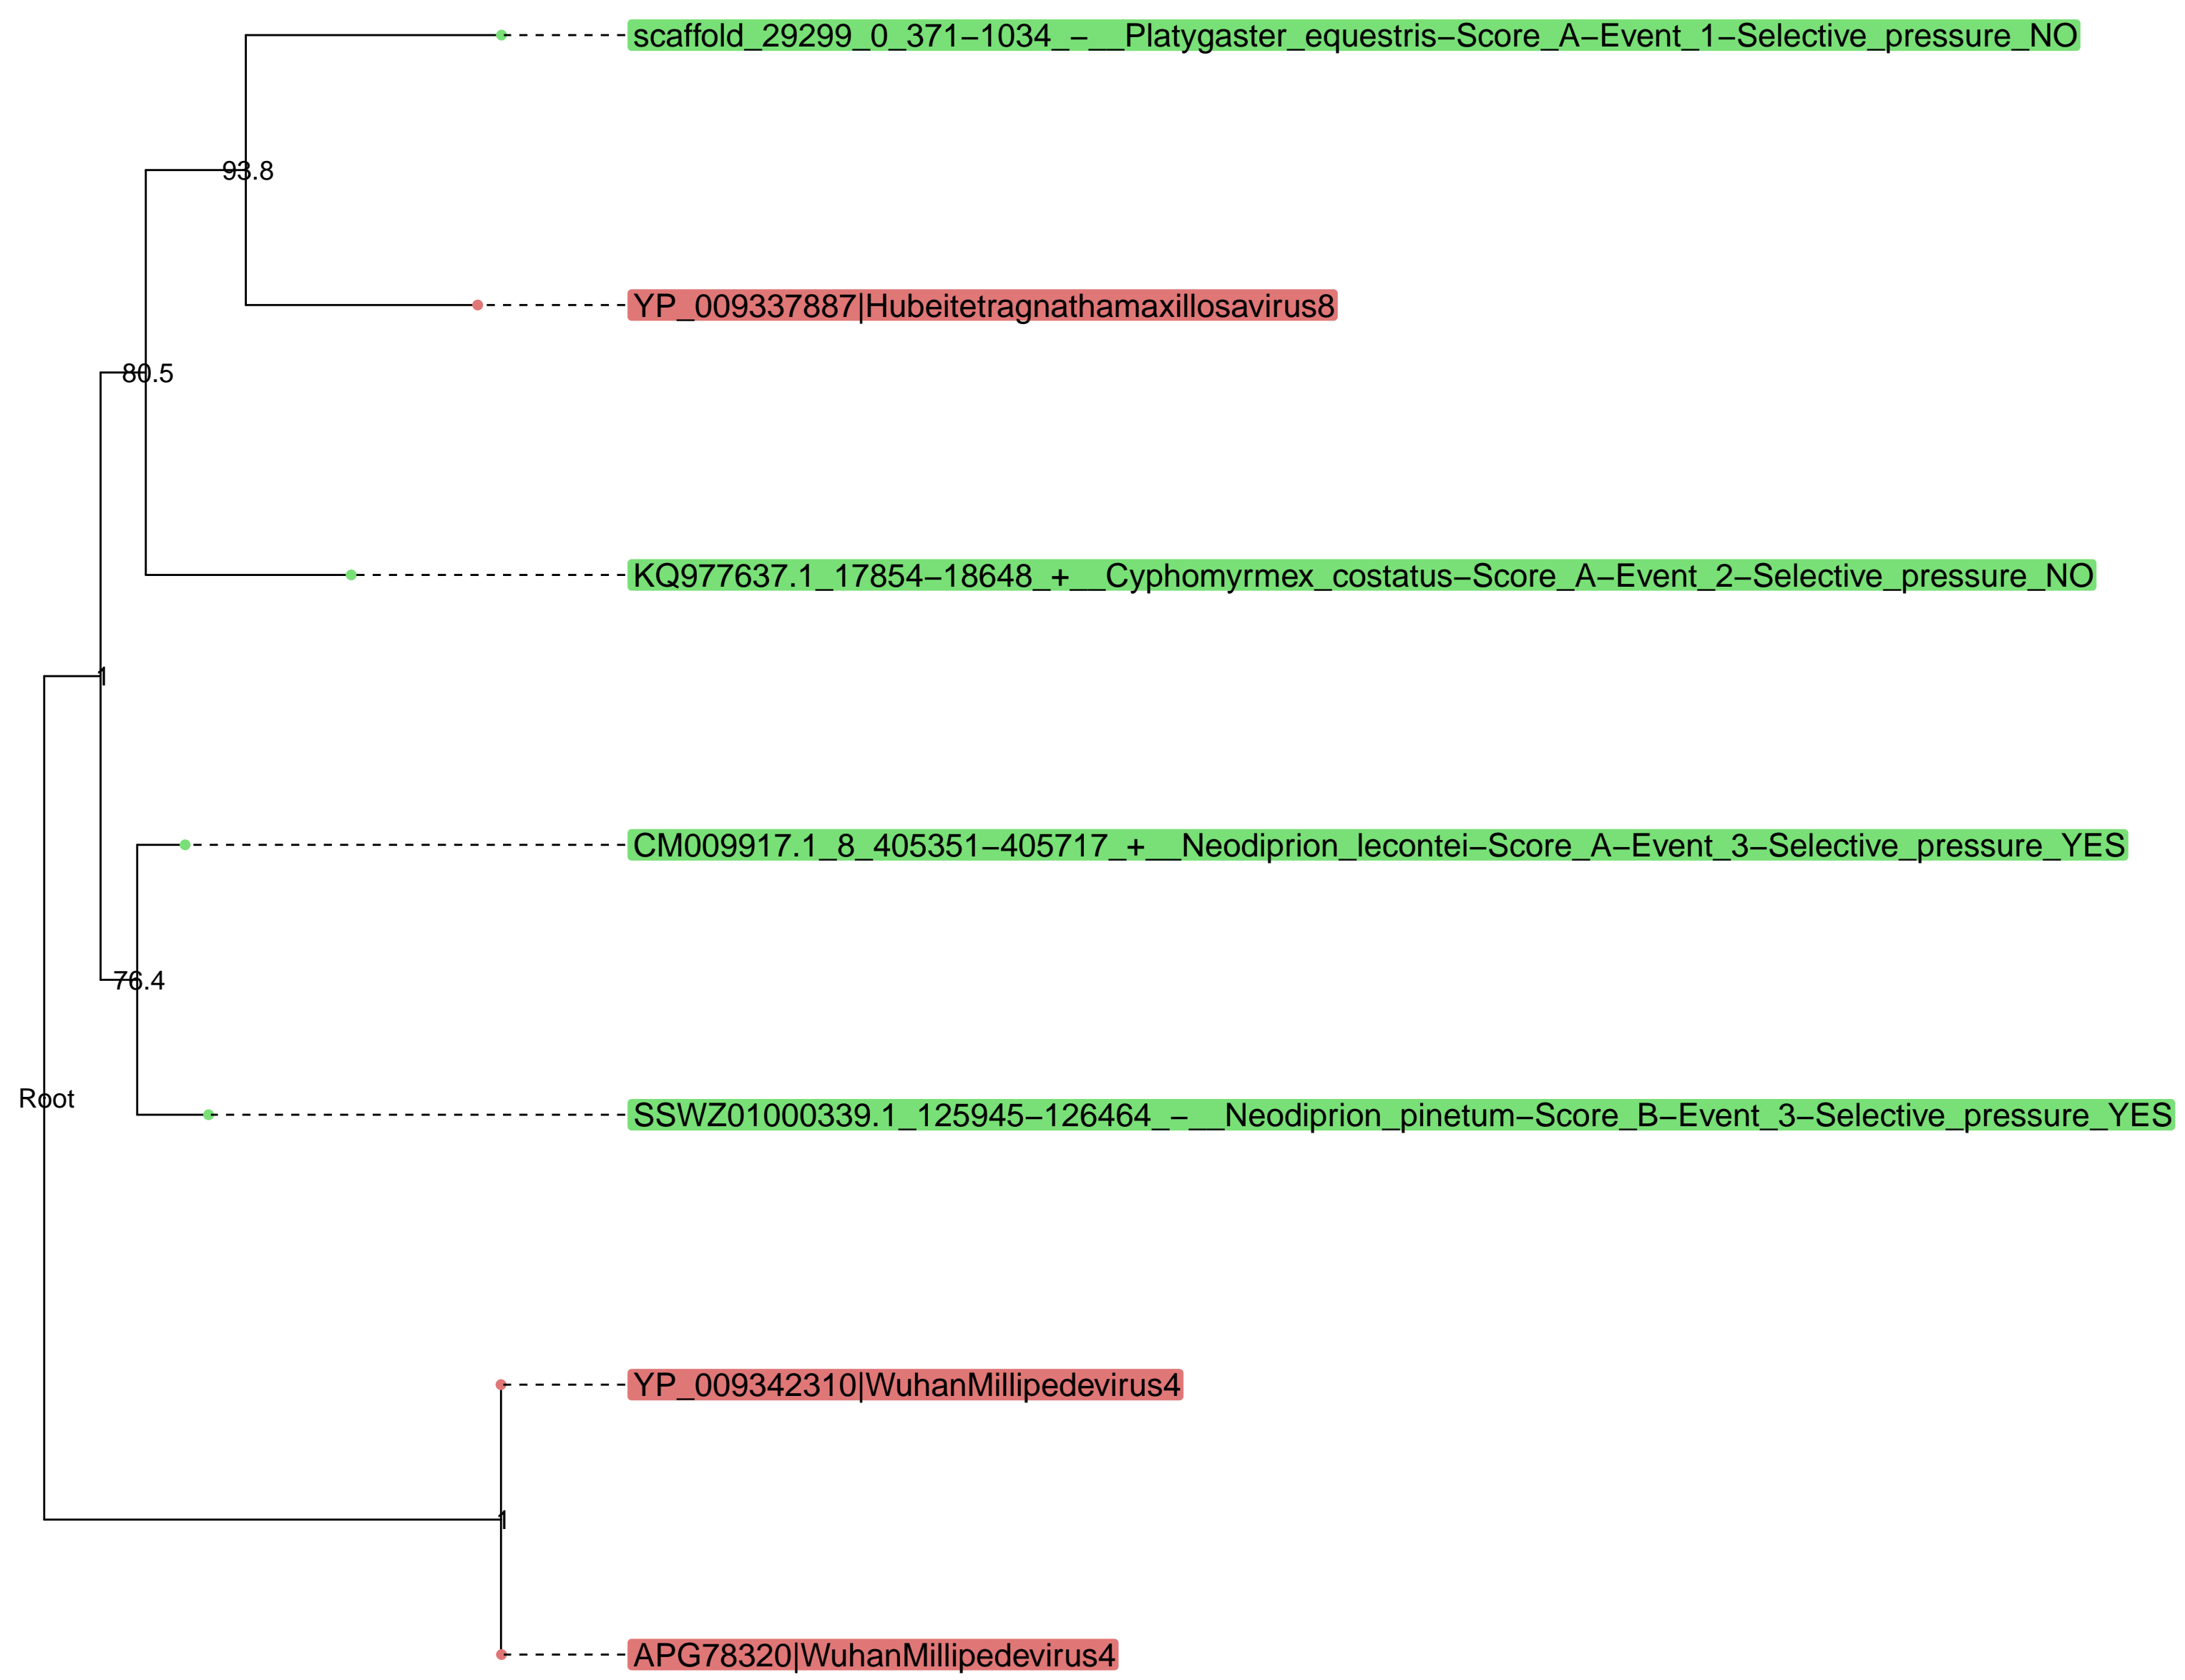



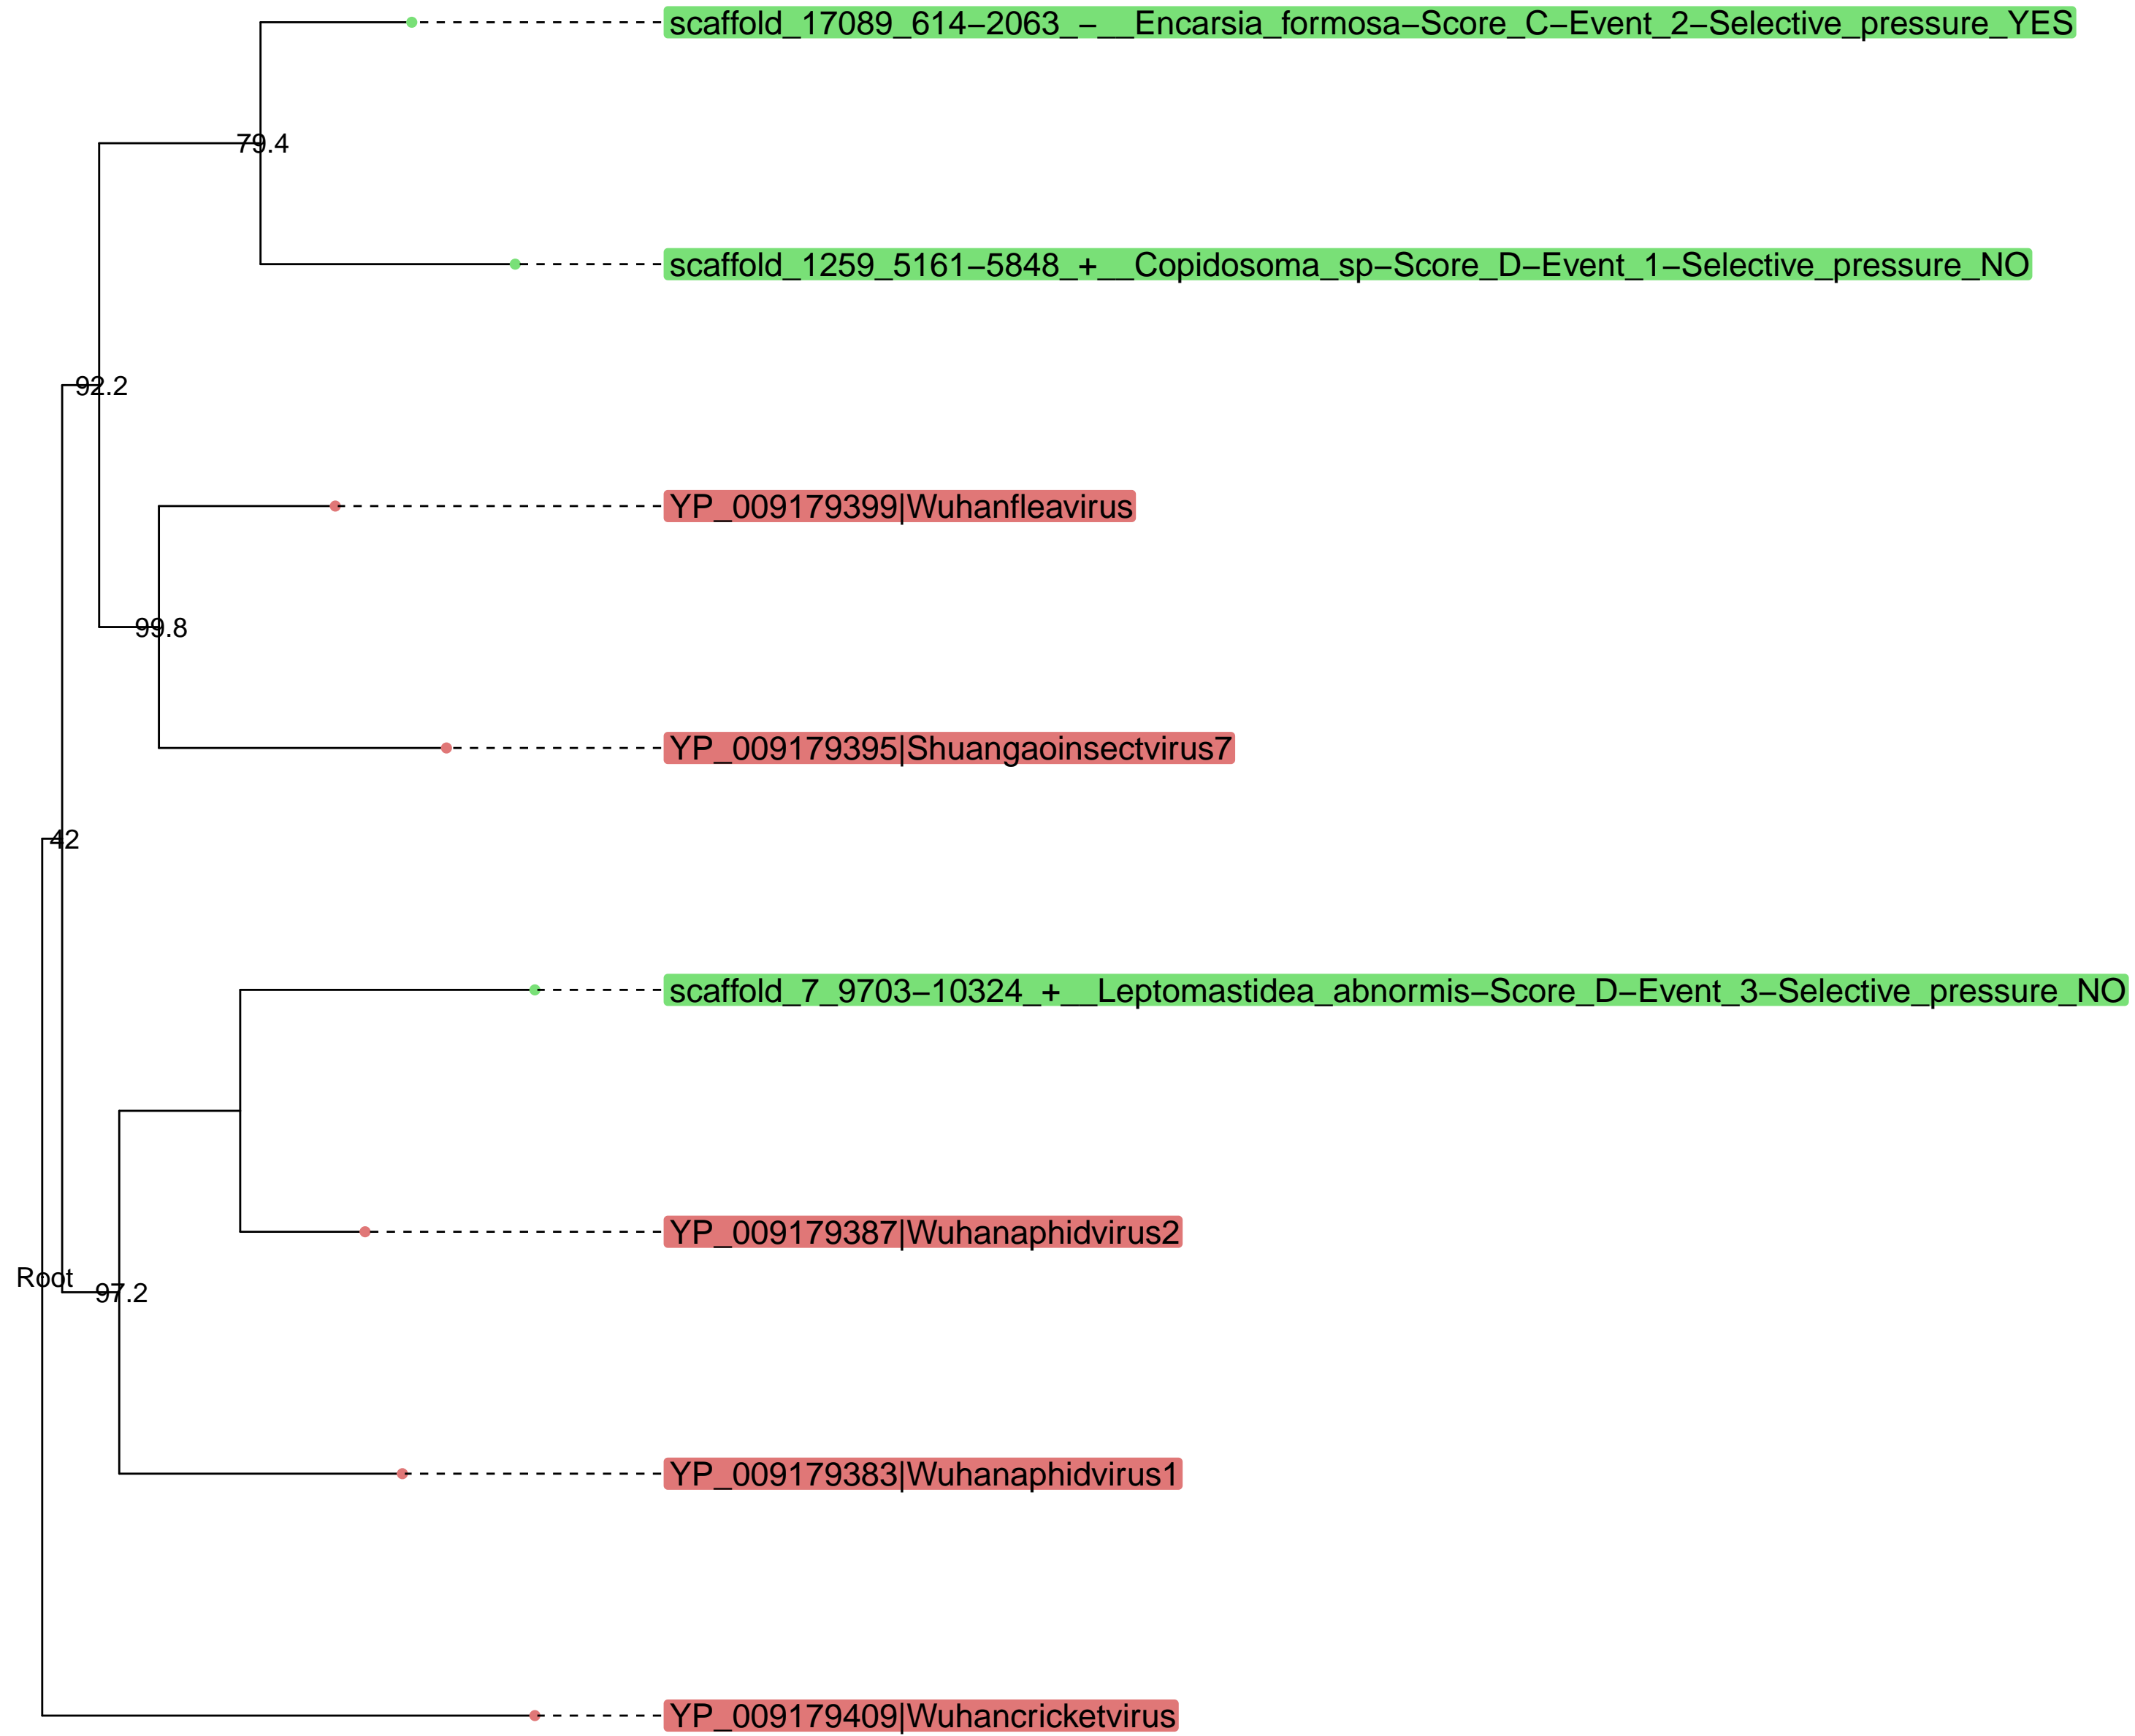

Cluster13782 – families involved : ['Unknown'] – putative protein : ['Putative capsid protein']

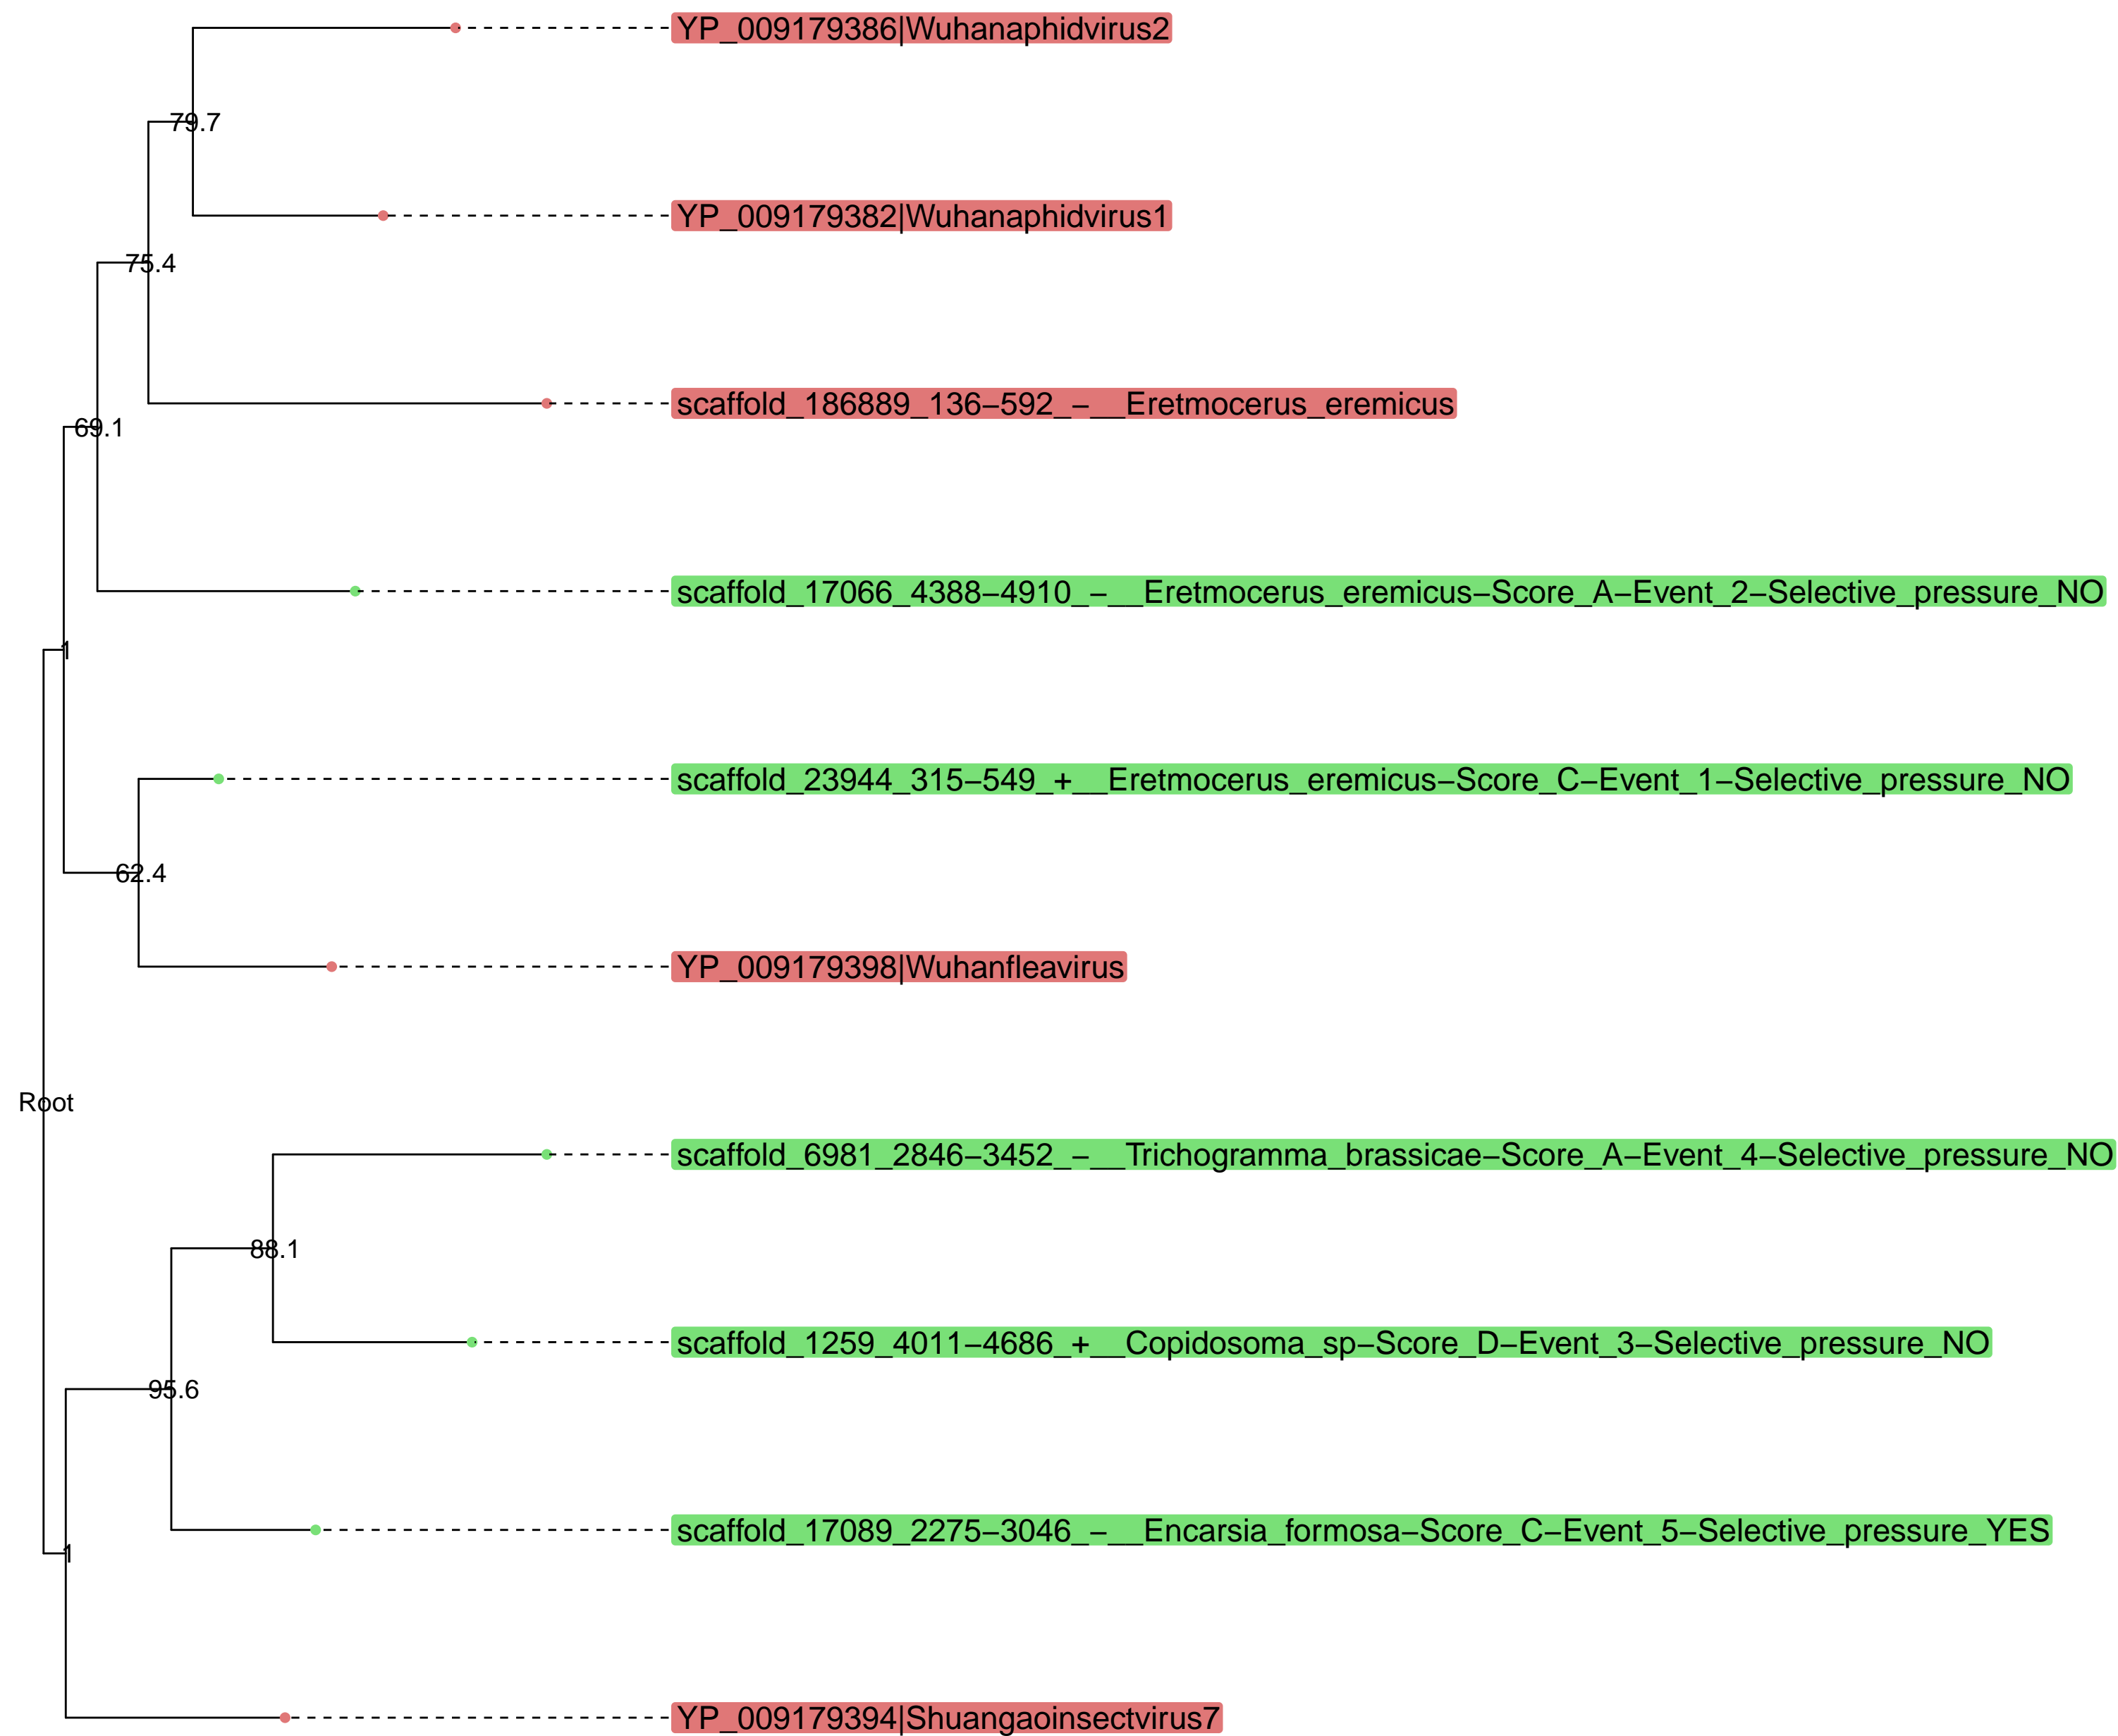

Cluster13533 – families involved : ['Reoviridae'] – putative protein : ['VP11']

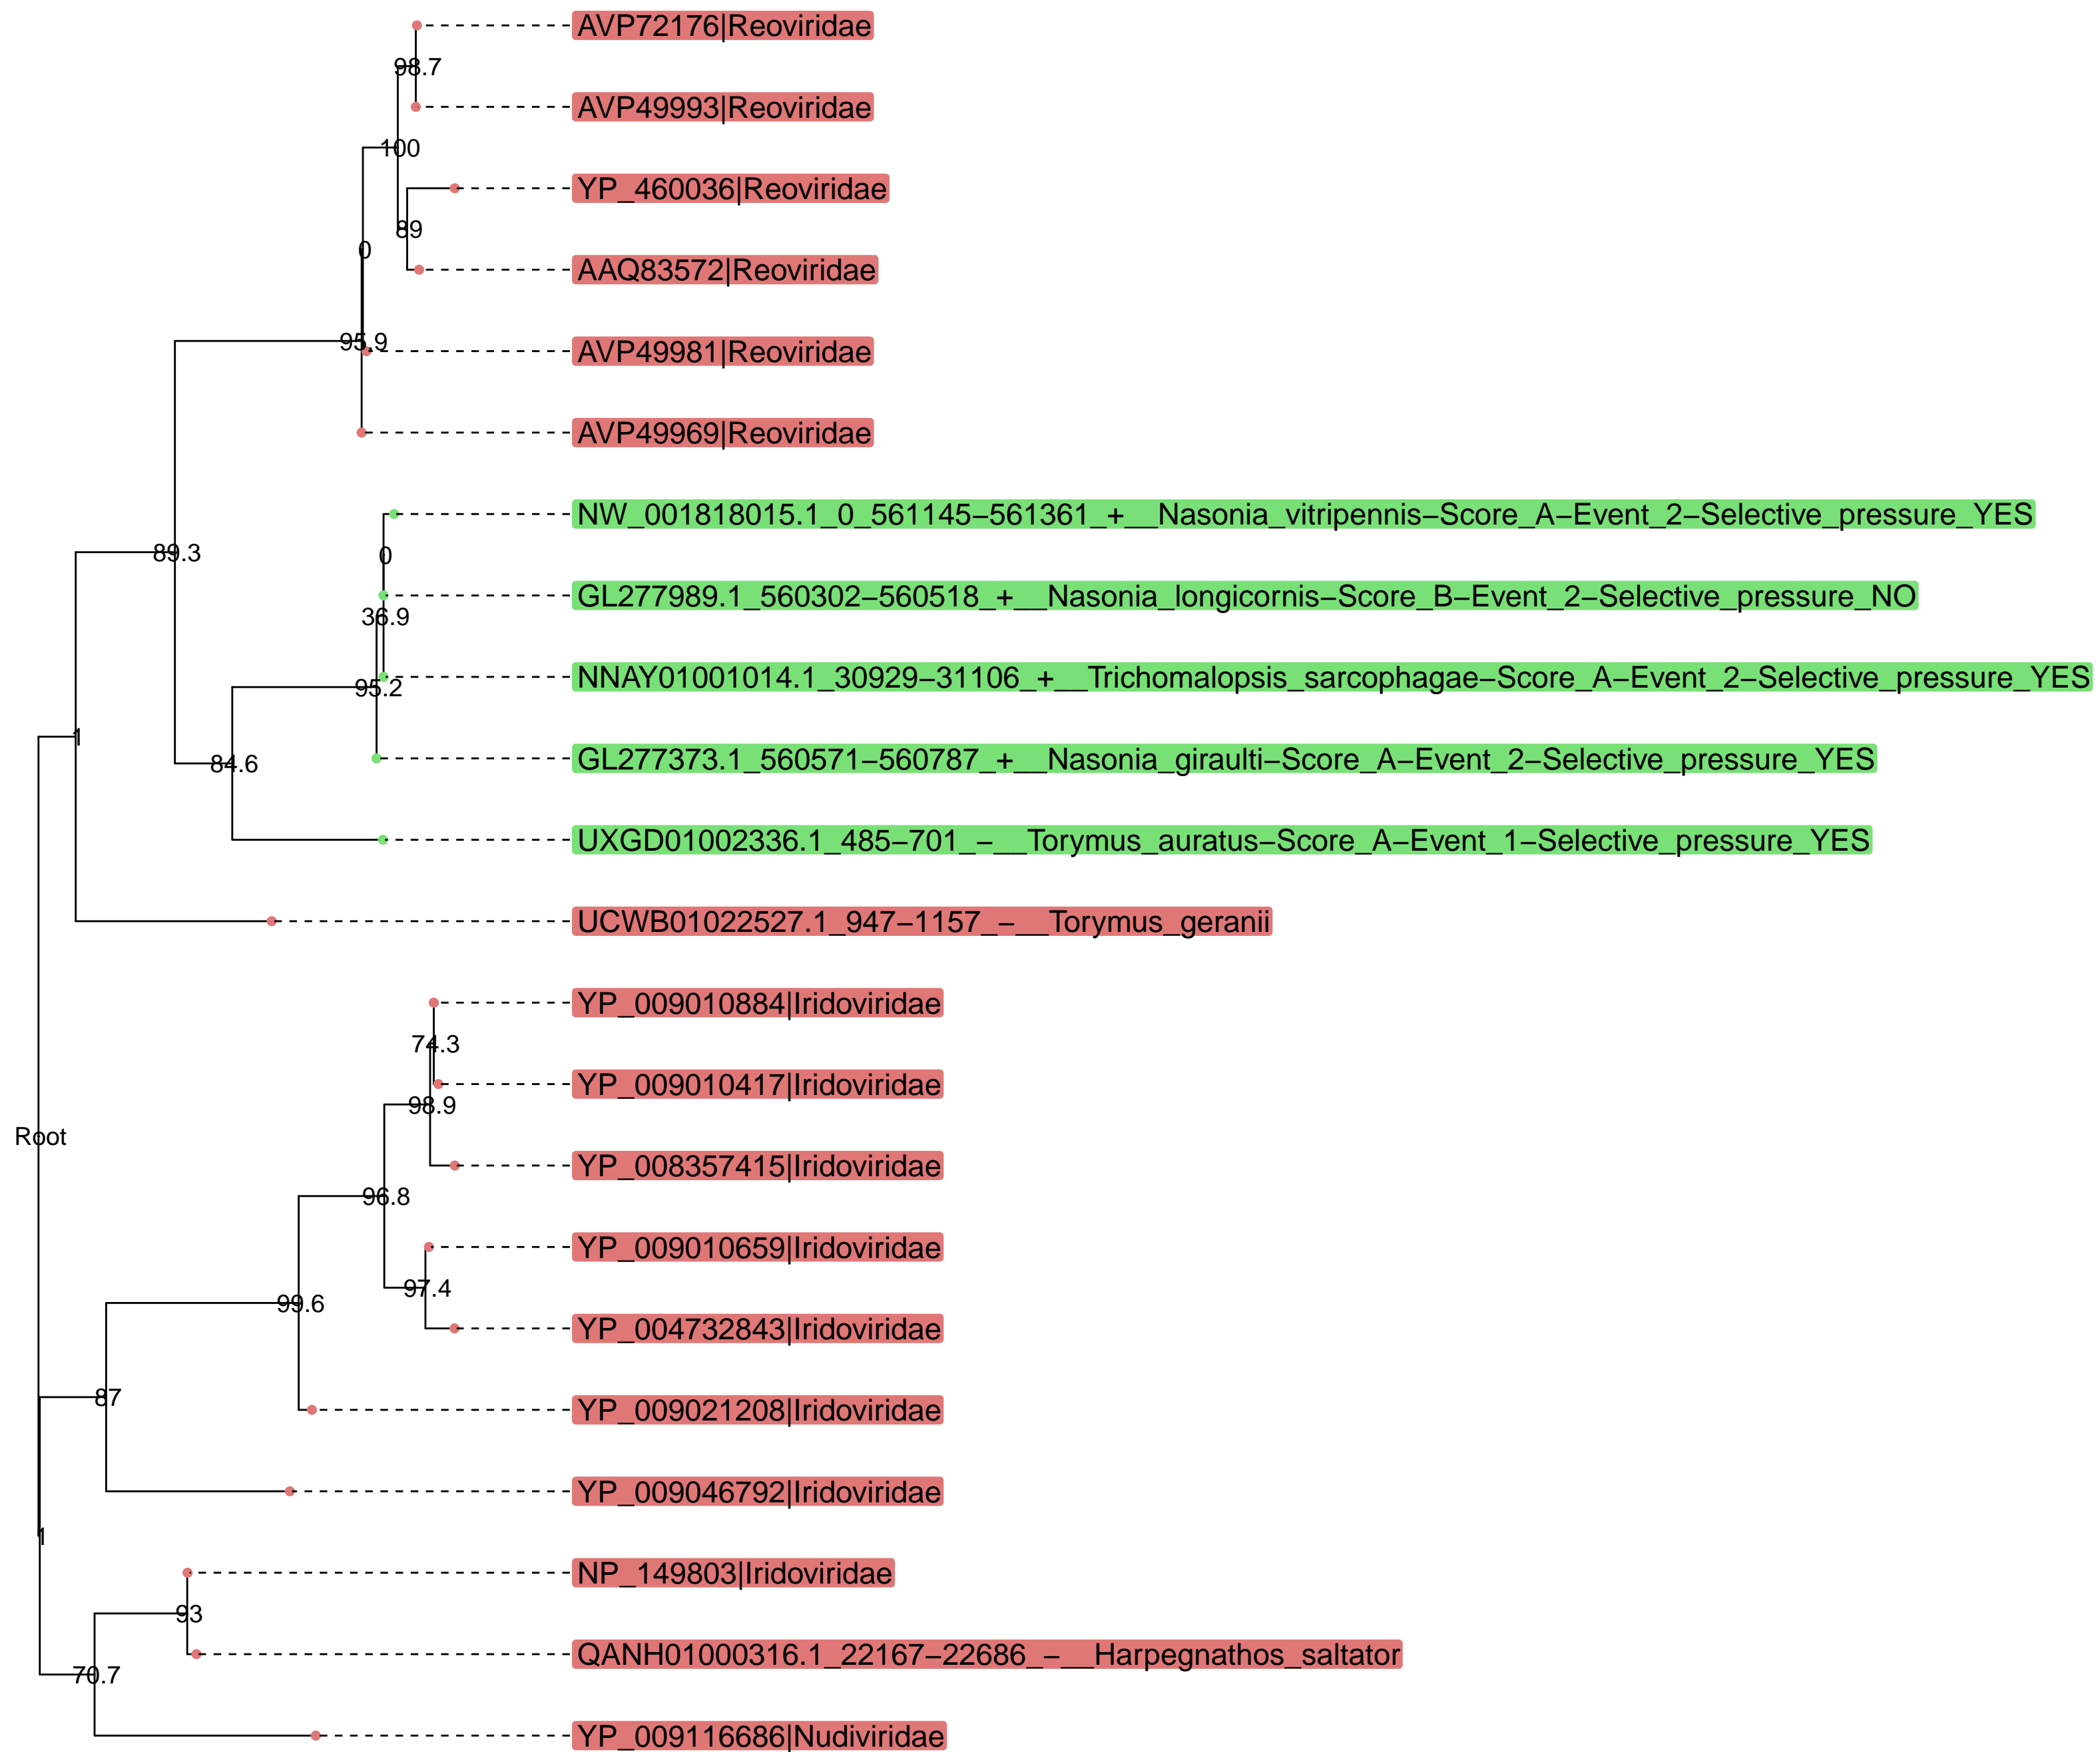

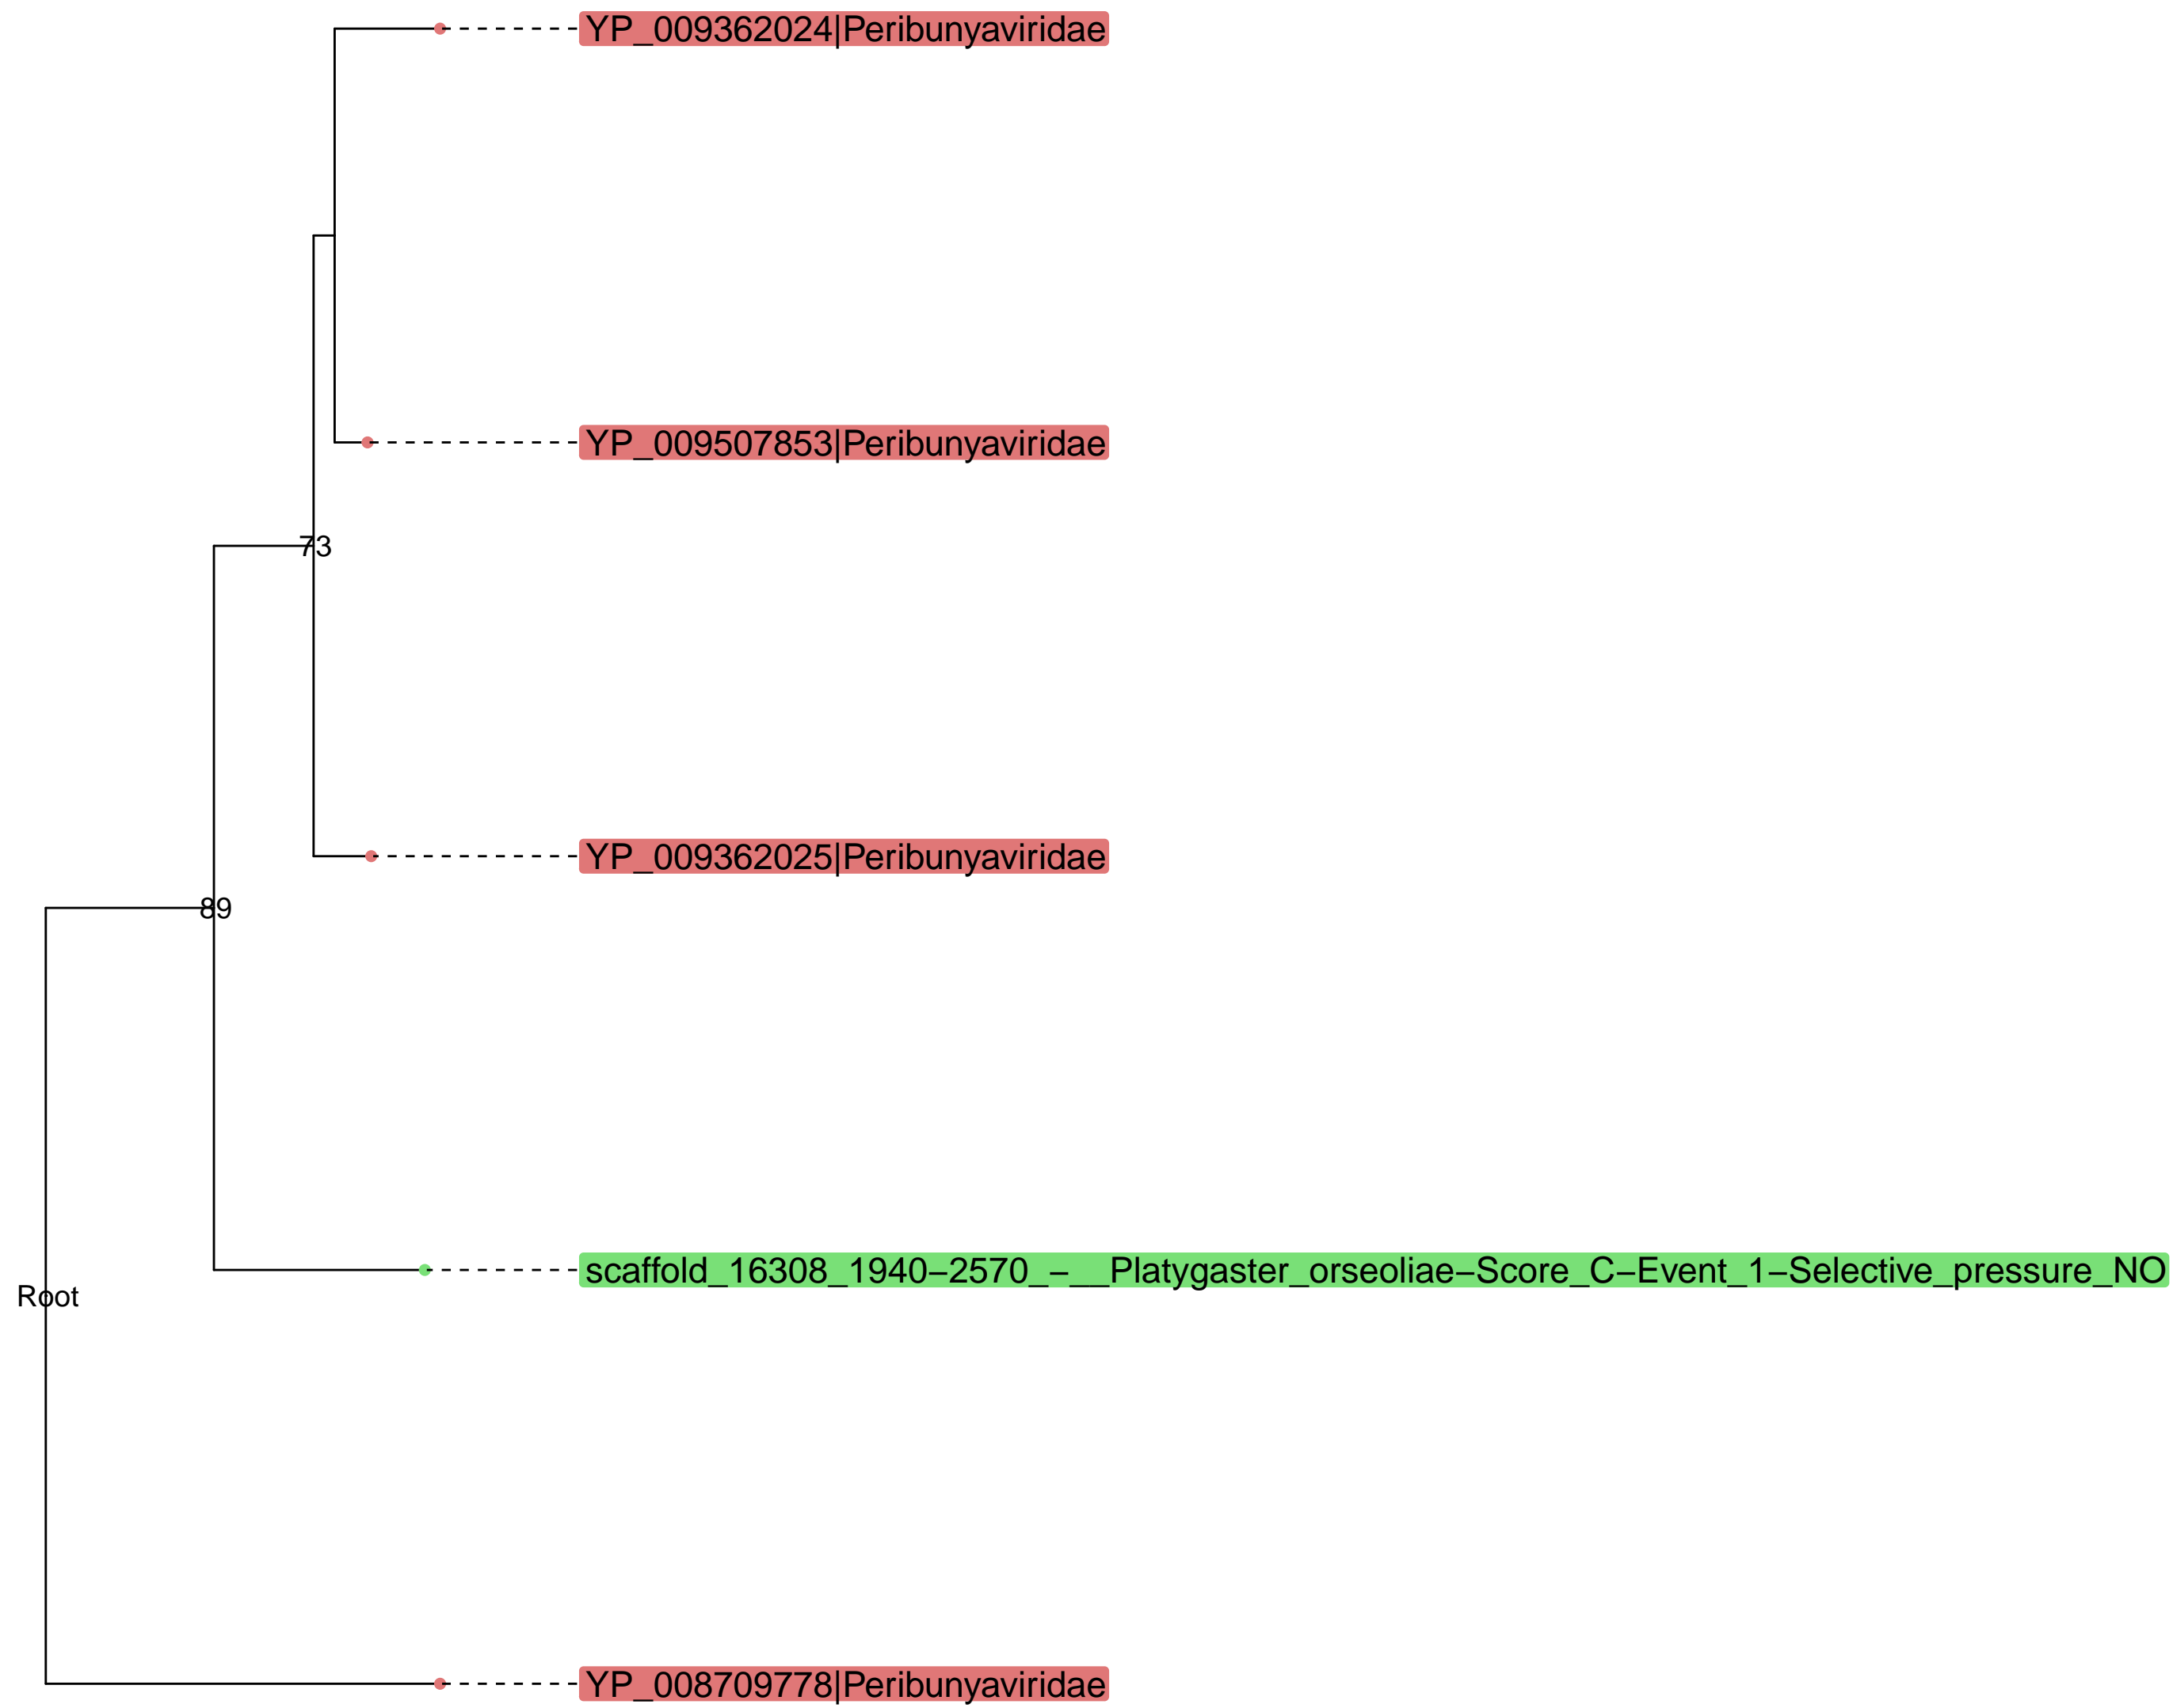

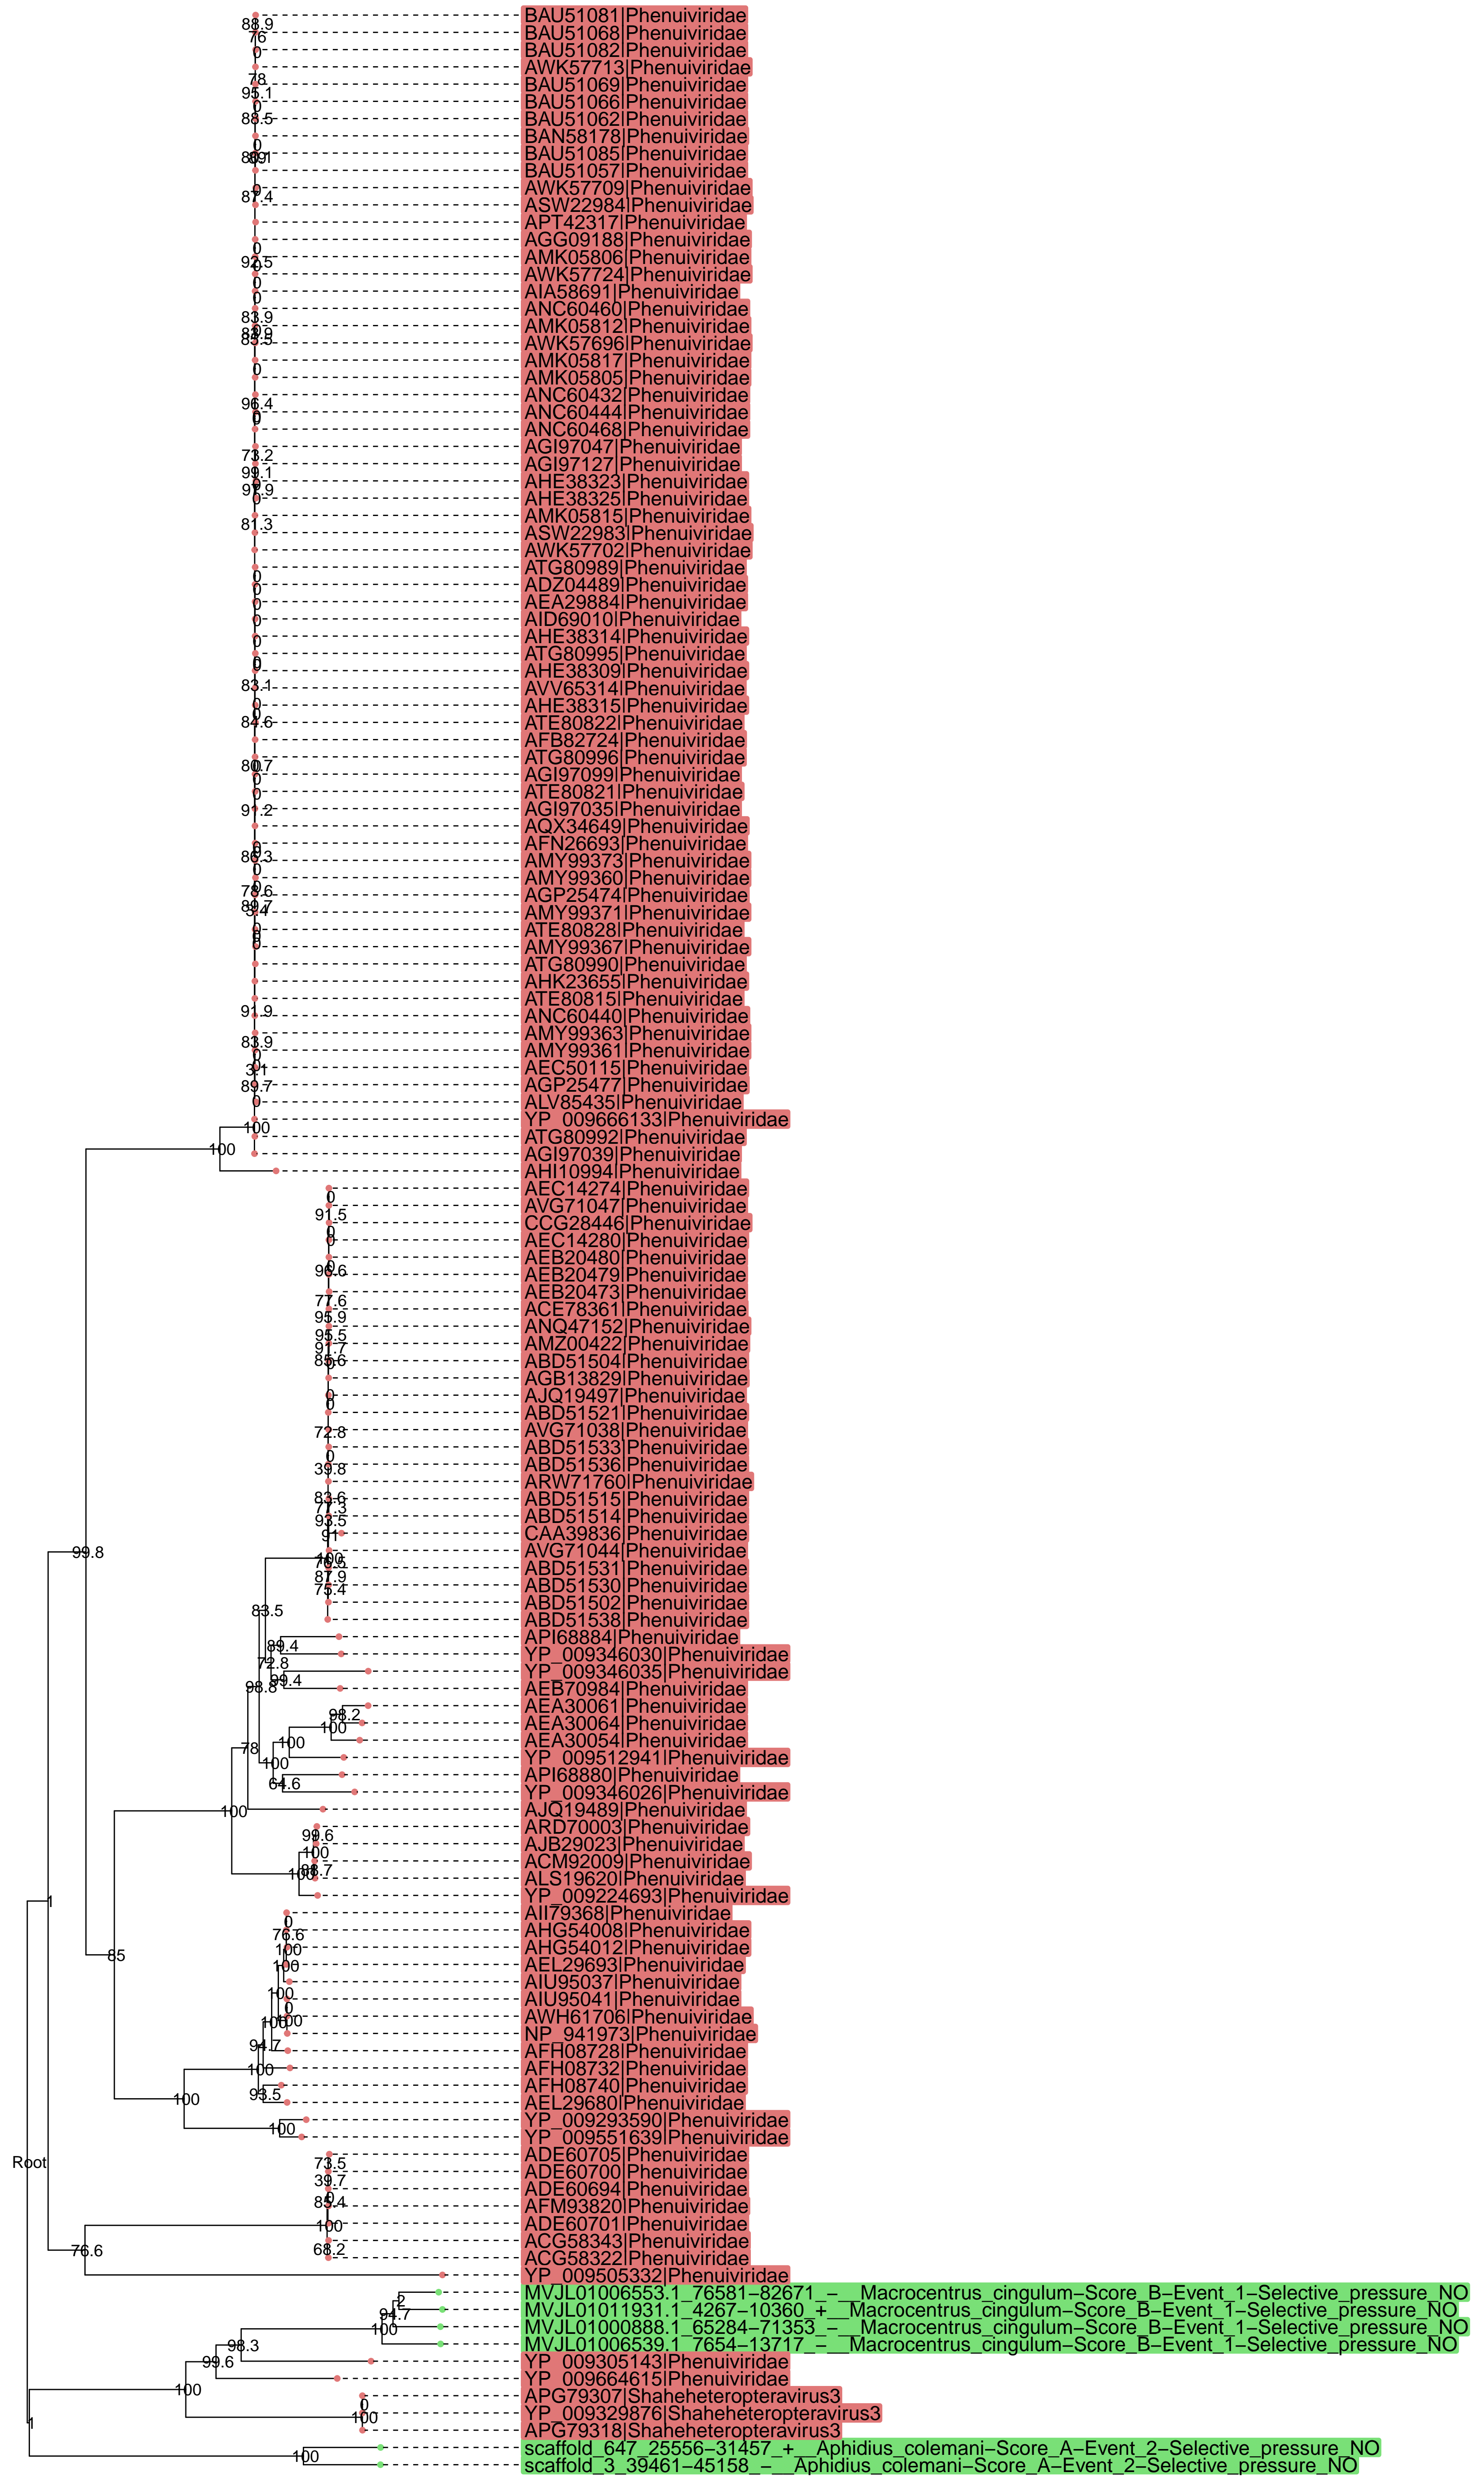

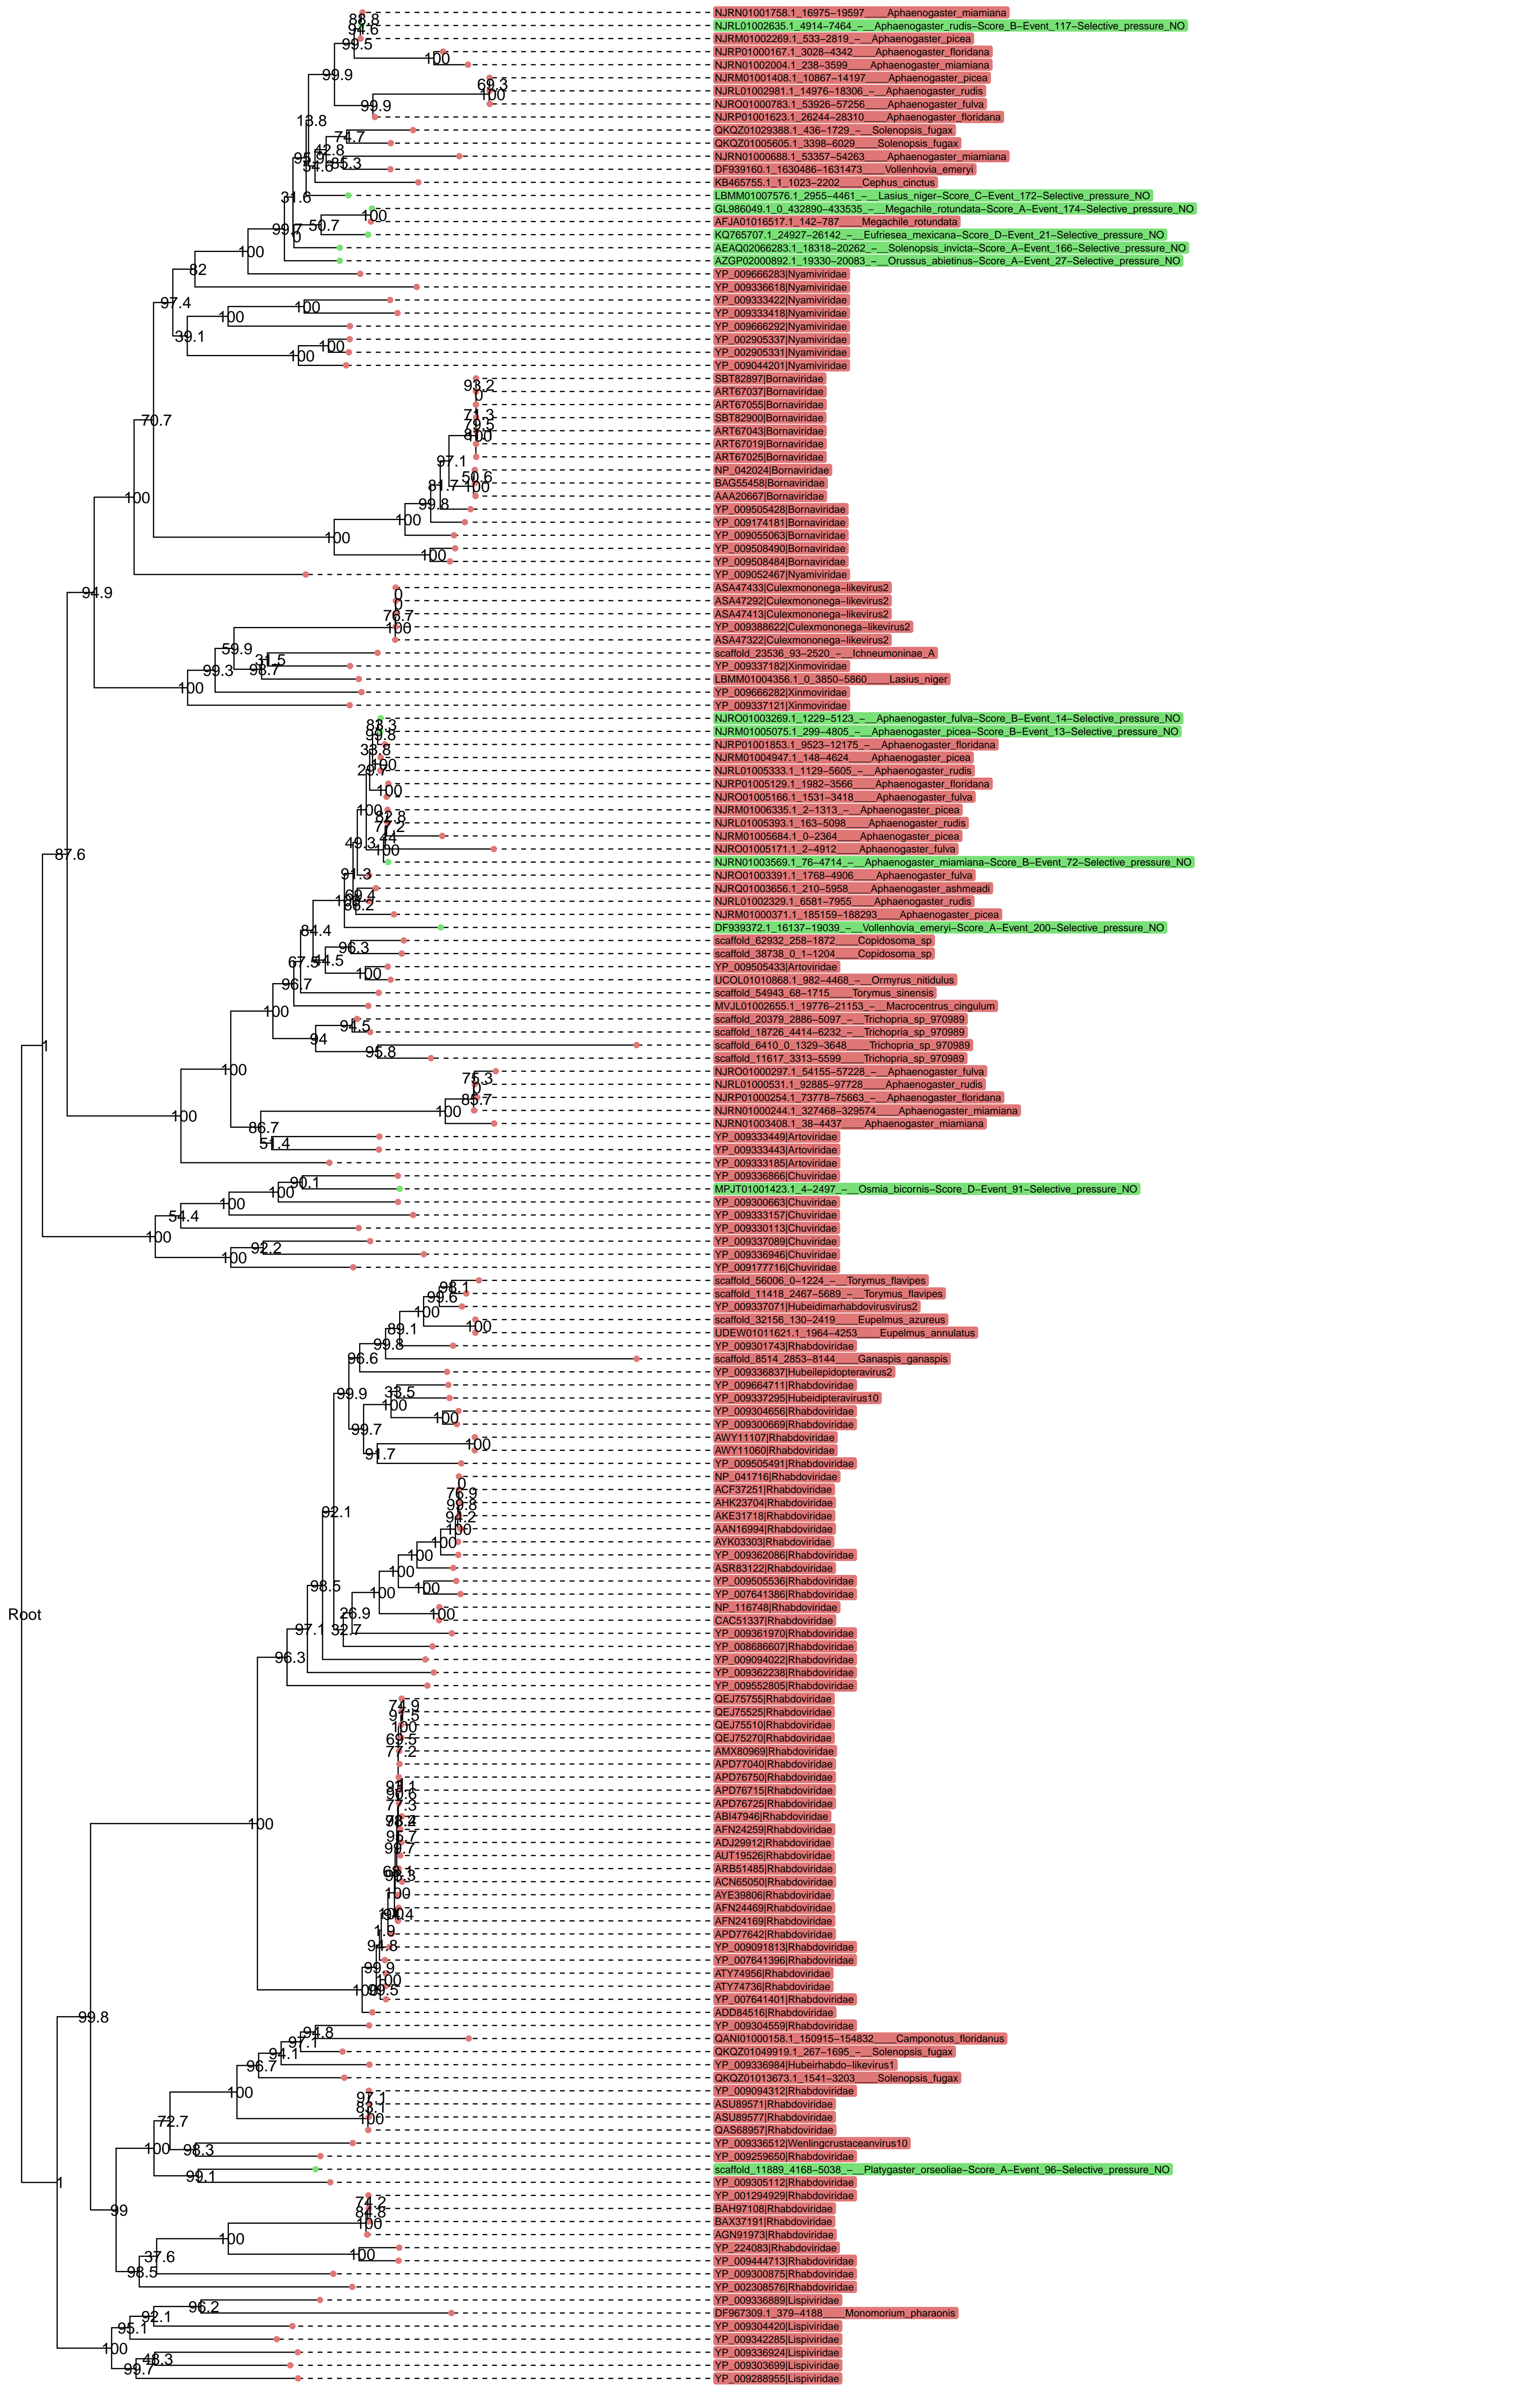

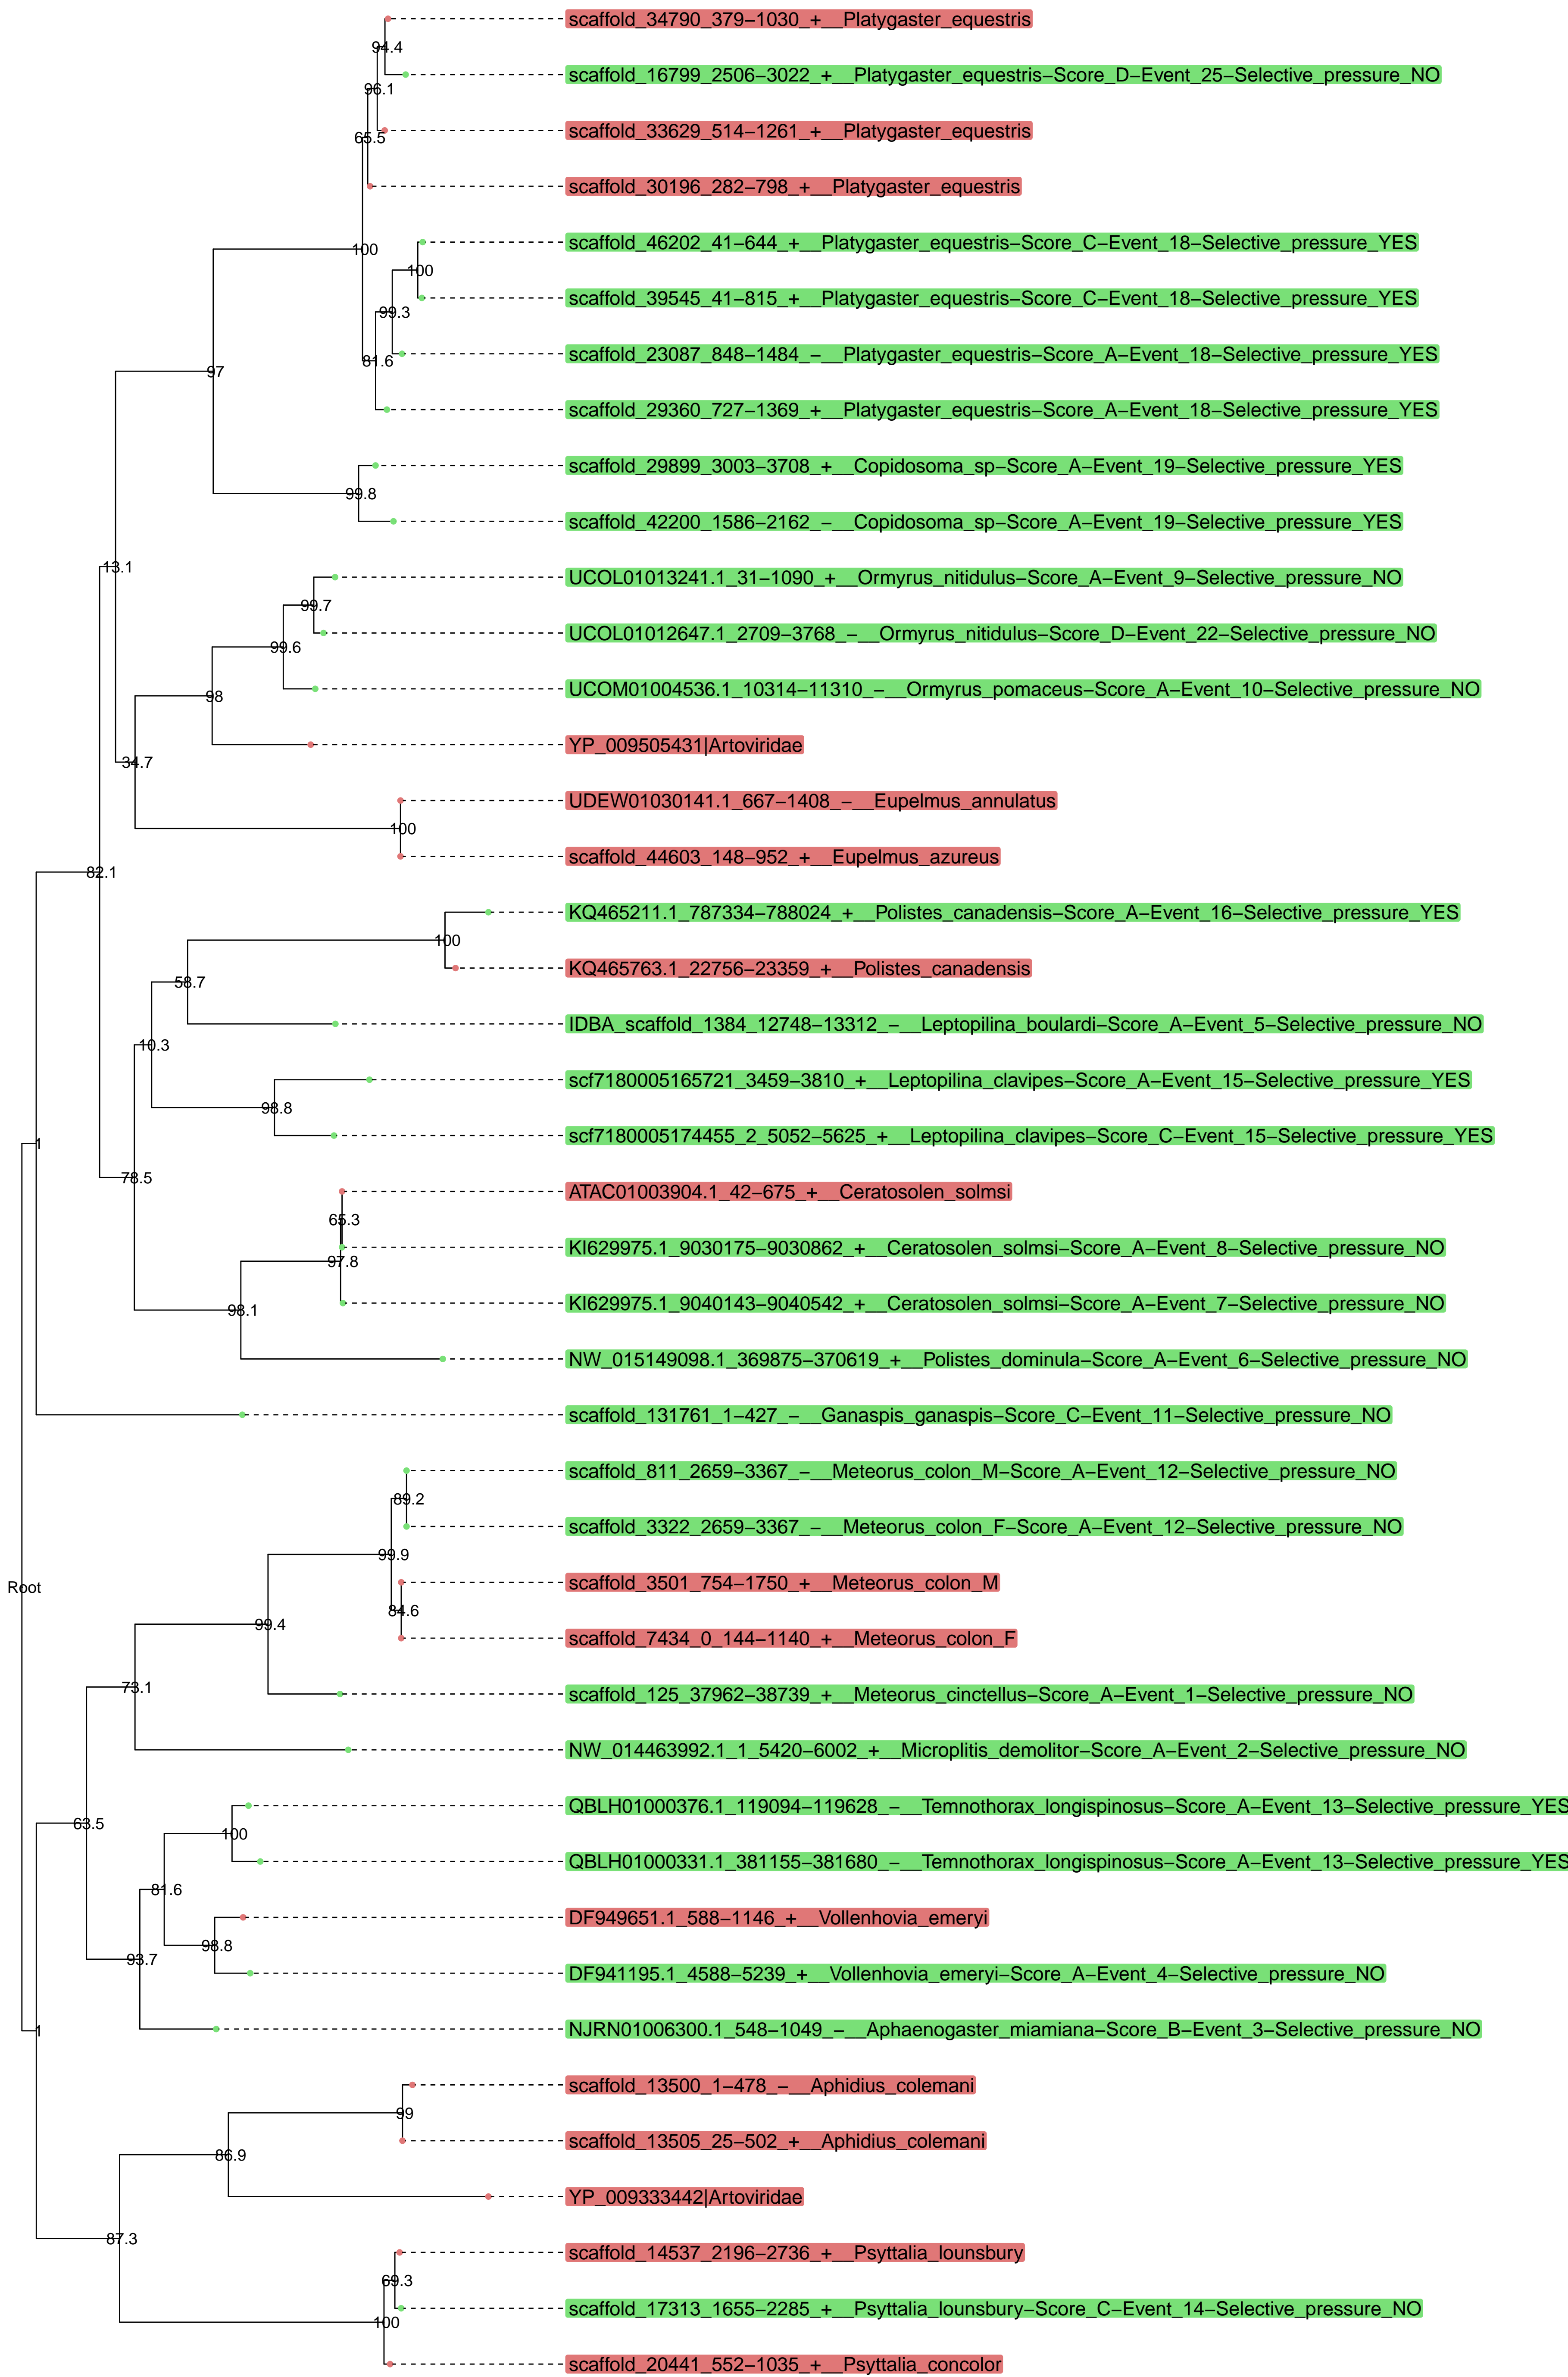

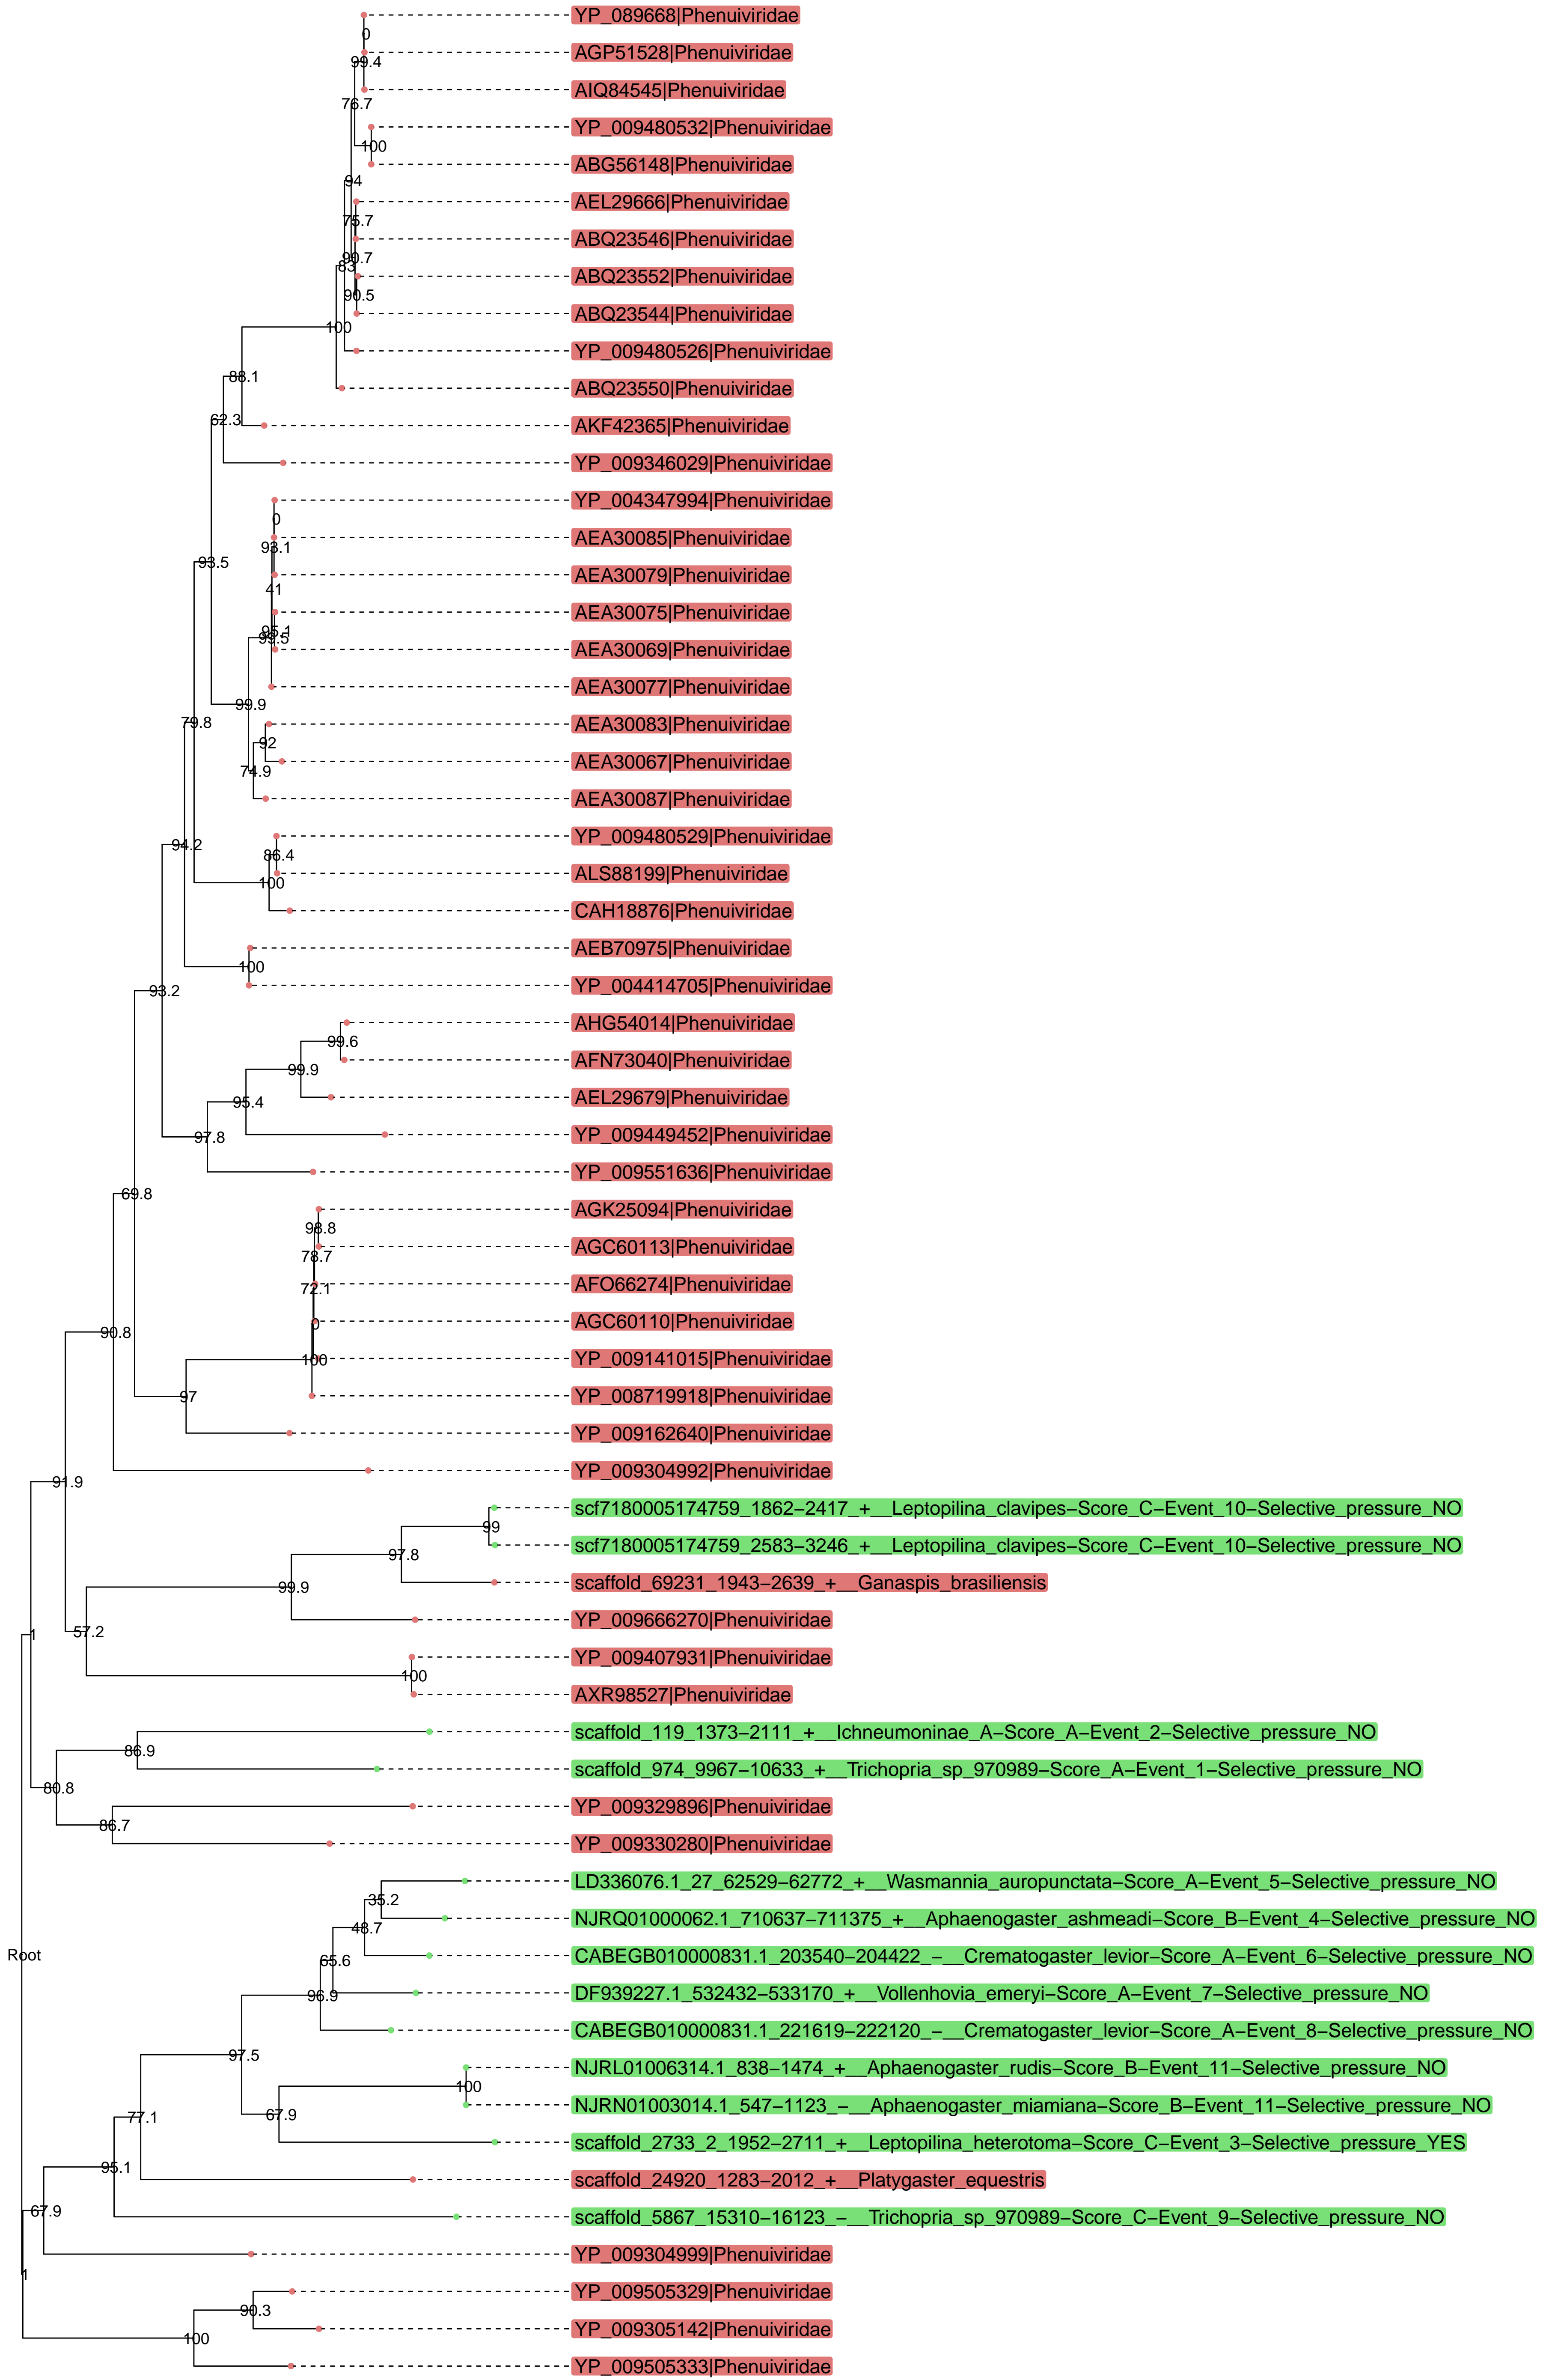



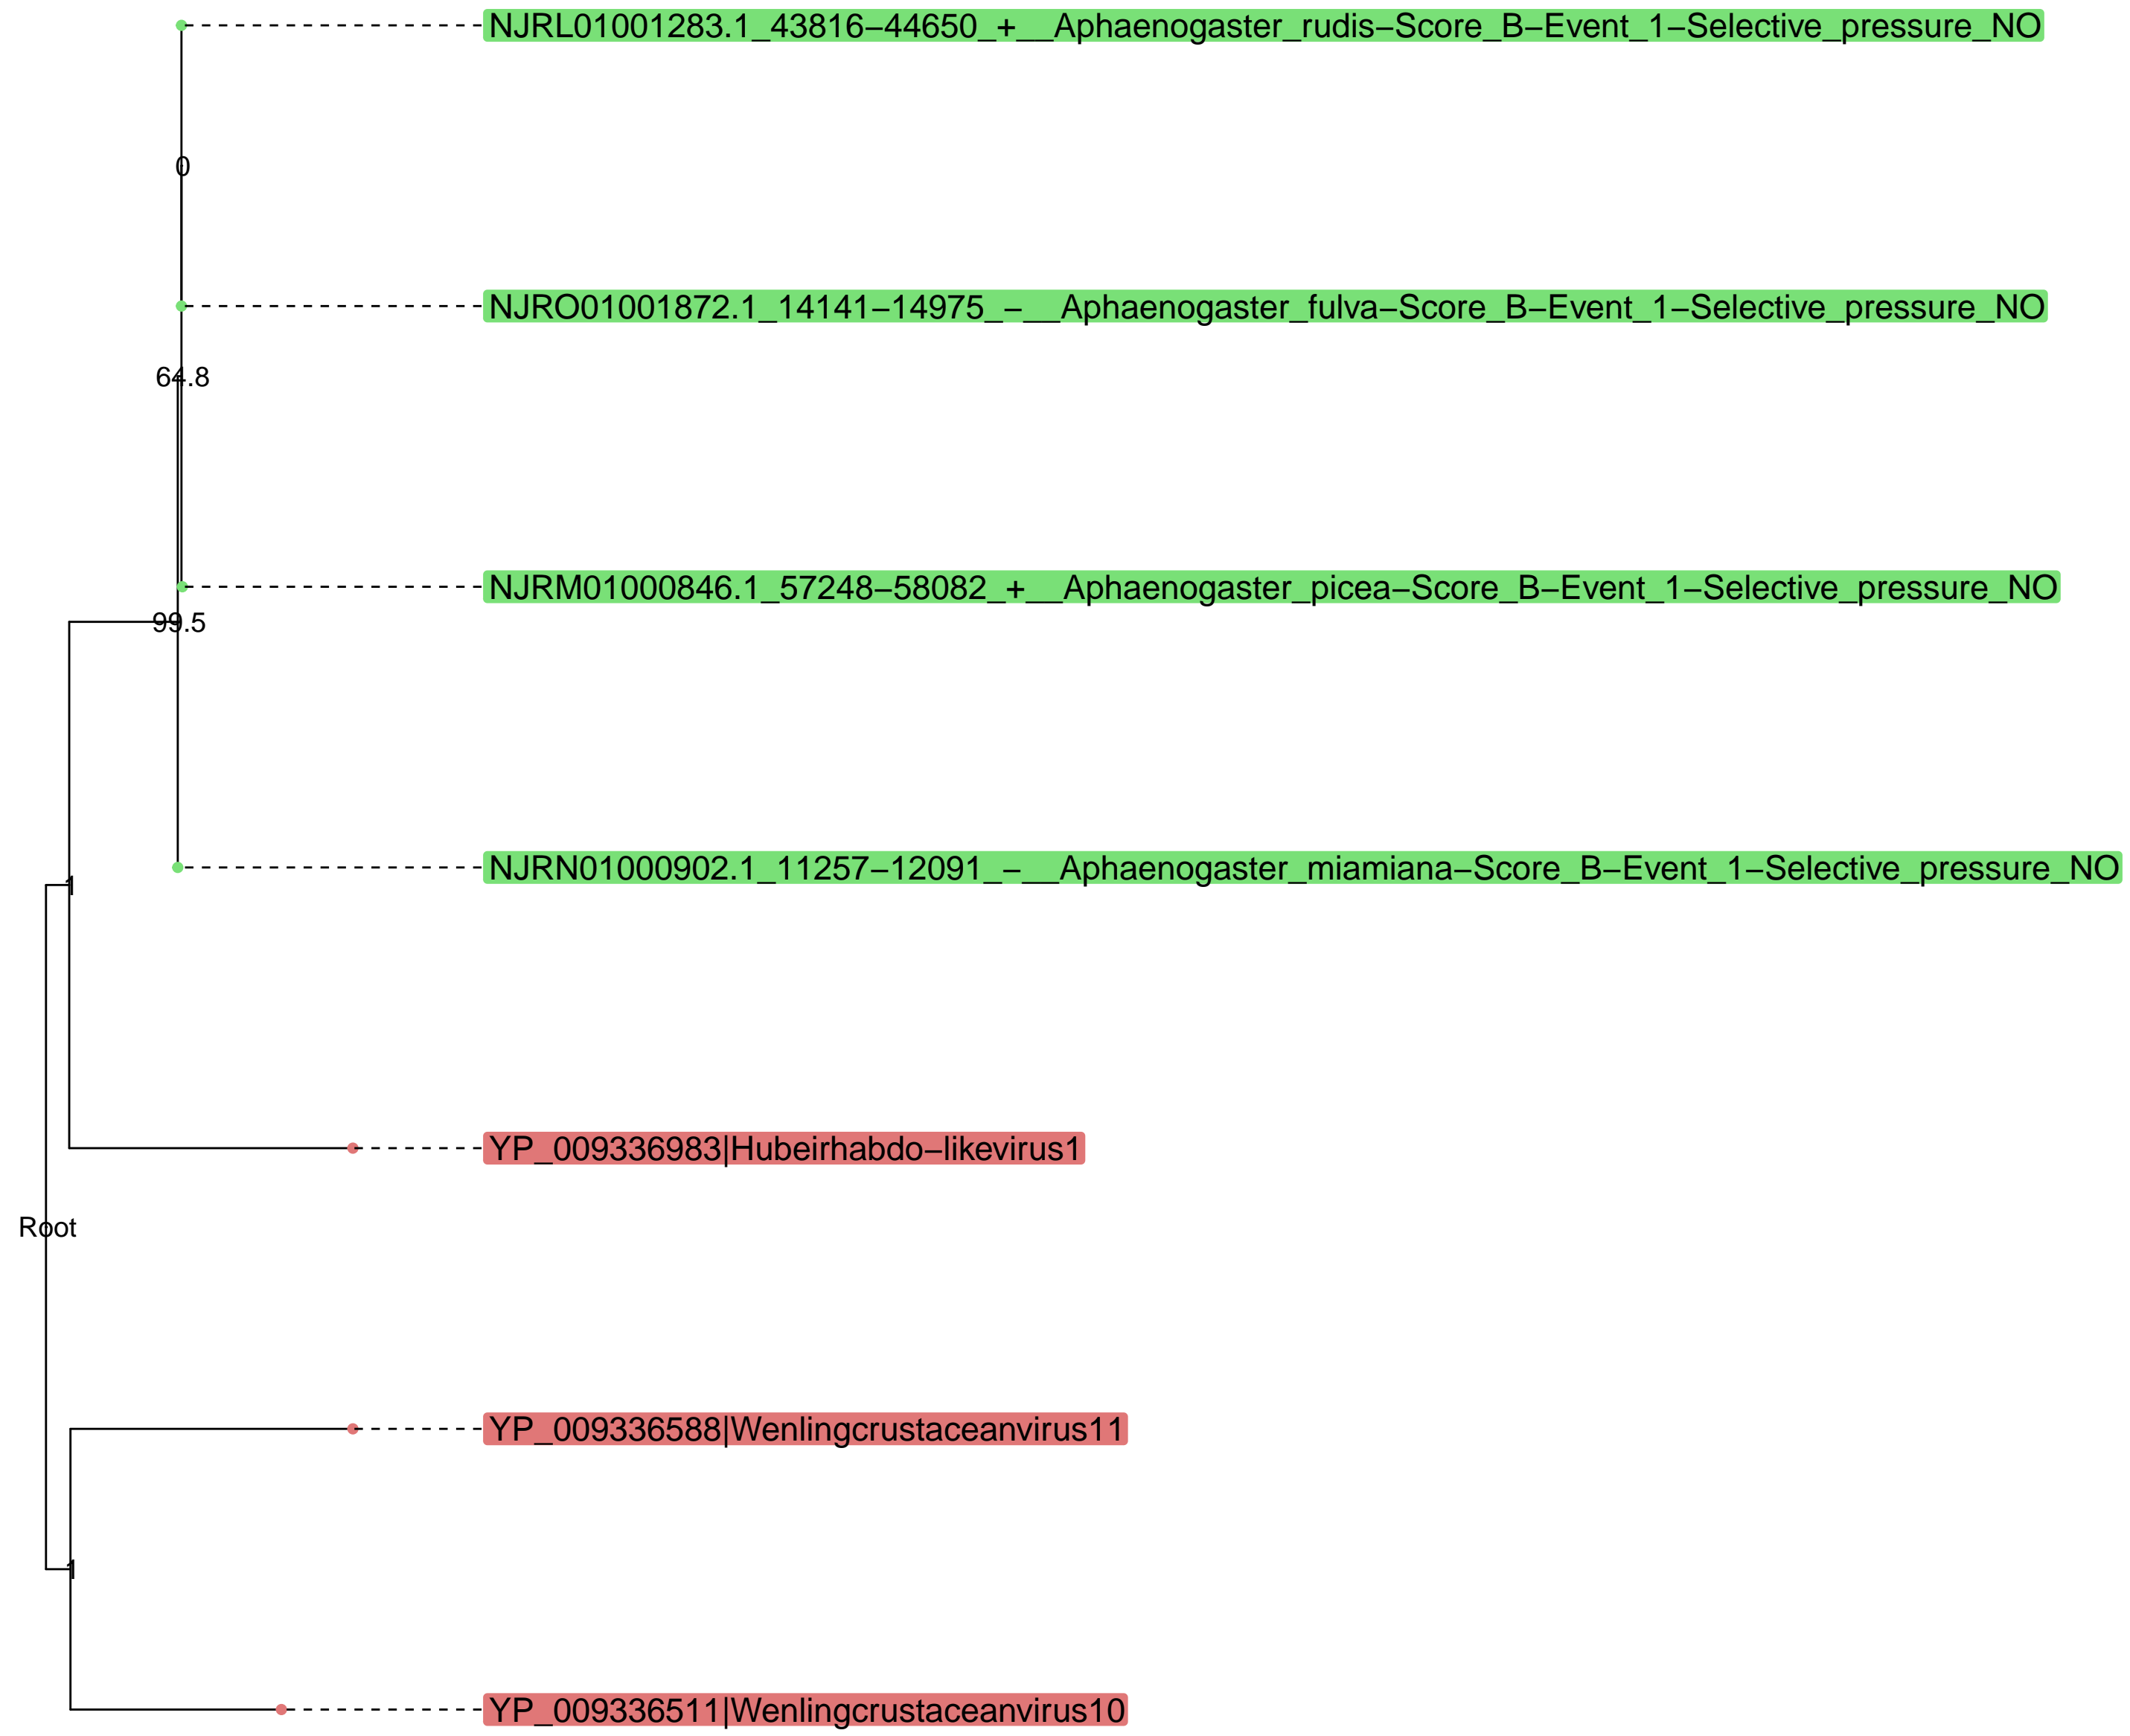

Cluster5646 – families involved : ['Hepe-Virga', 'Tymoviridae'] – putative protein : ['Uncharacterized protein']

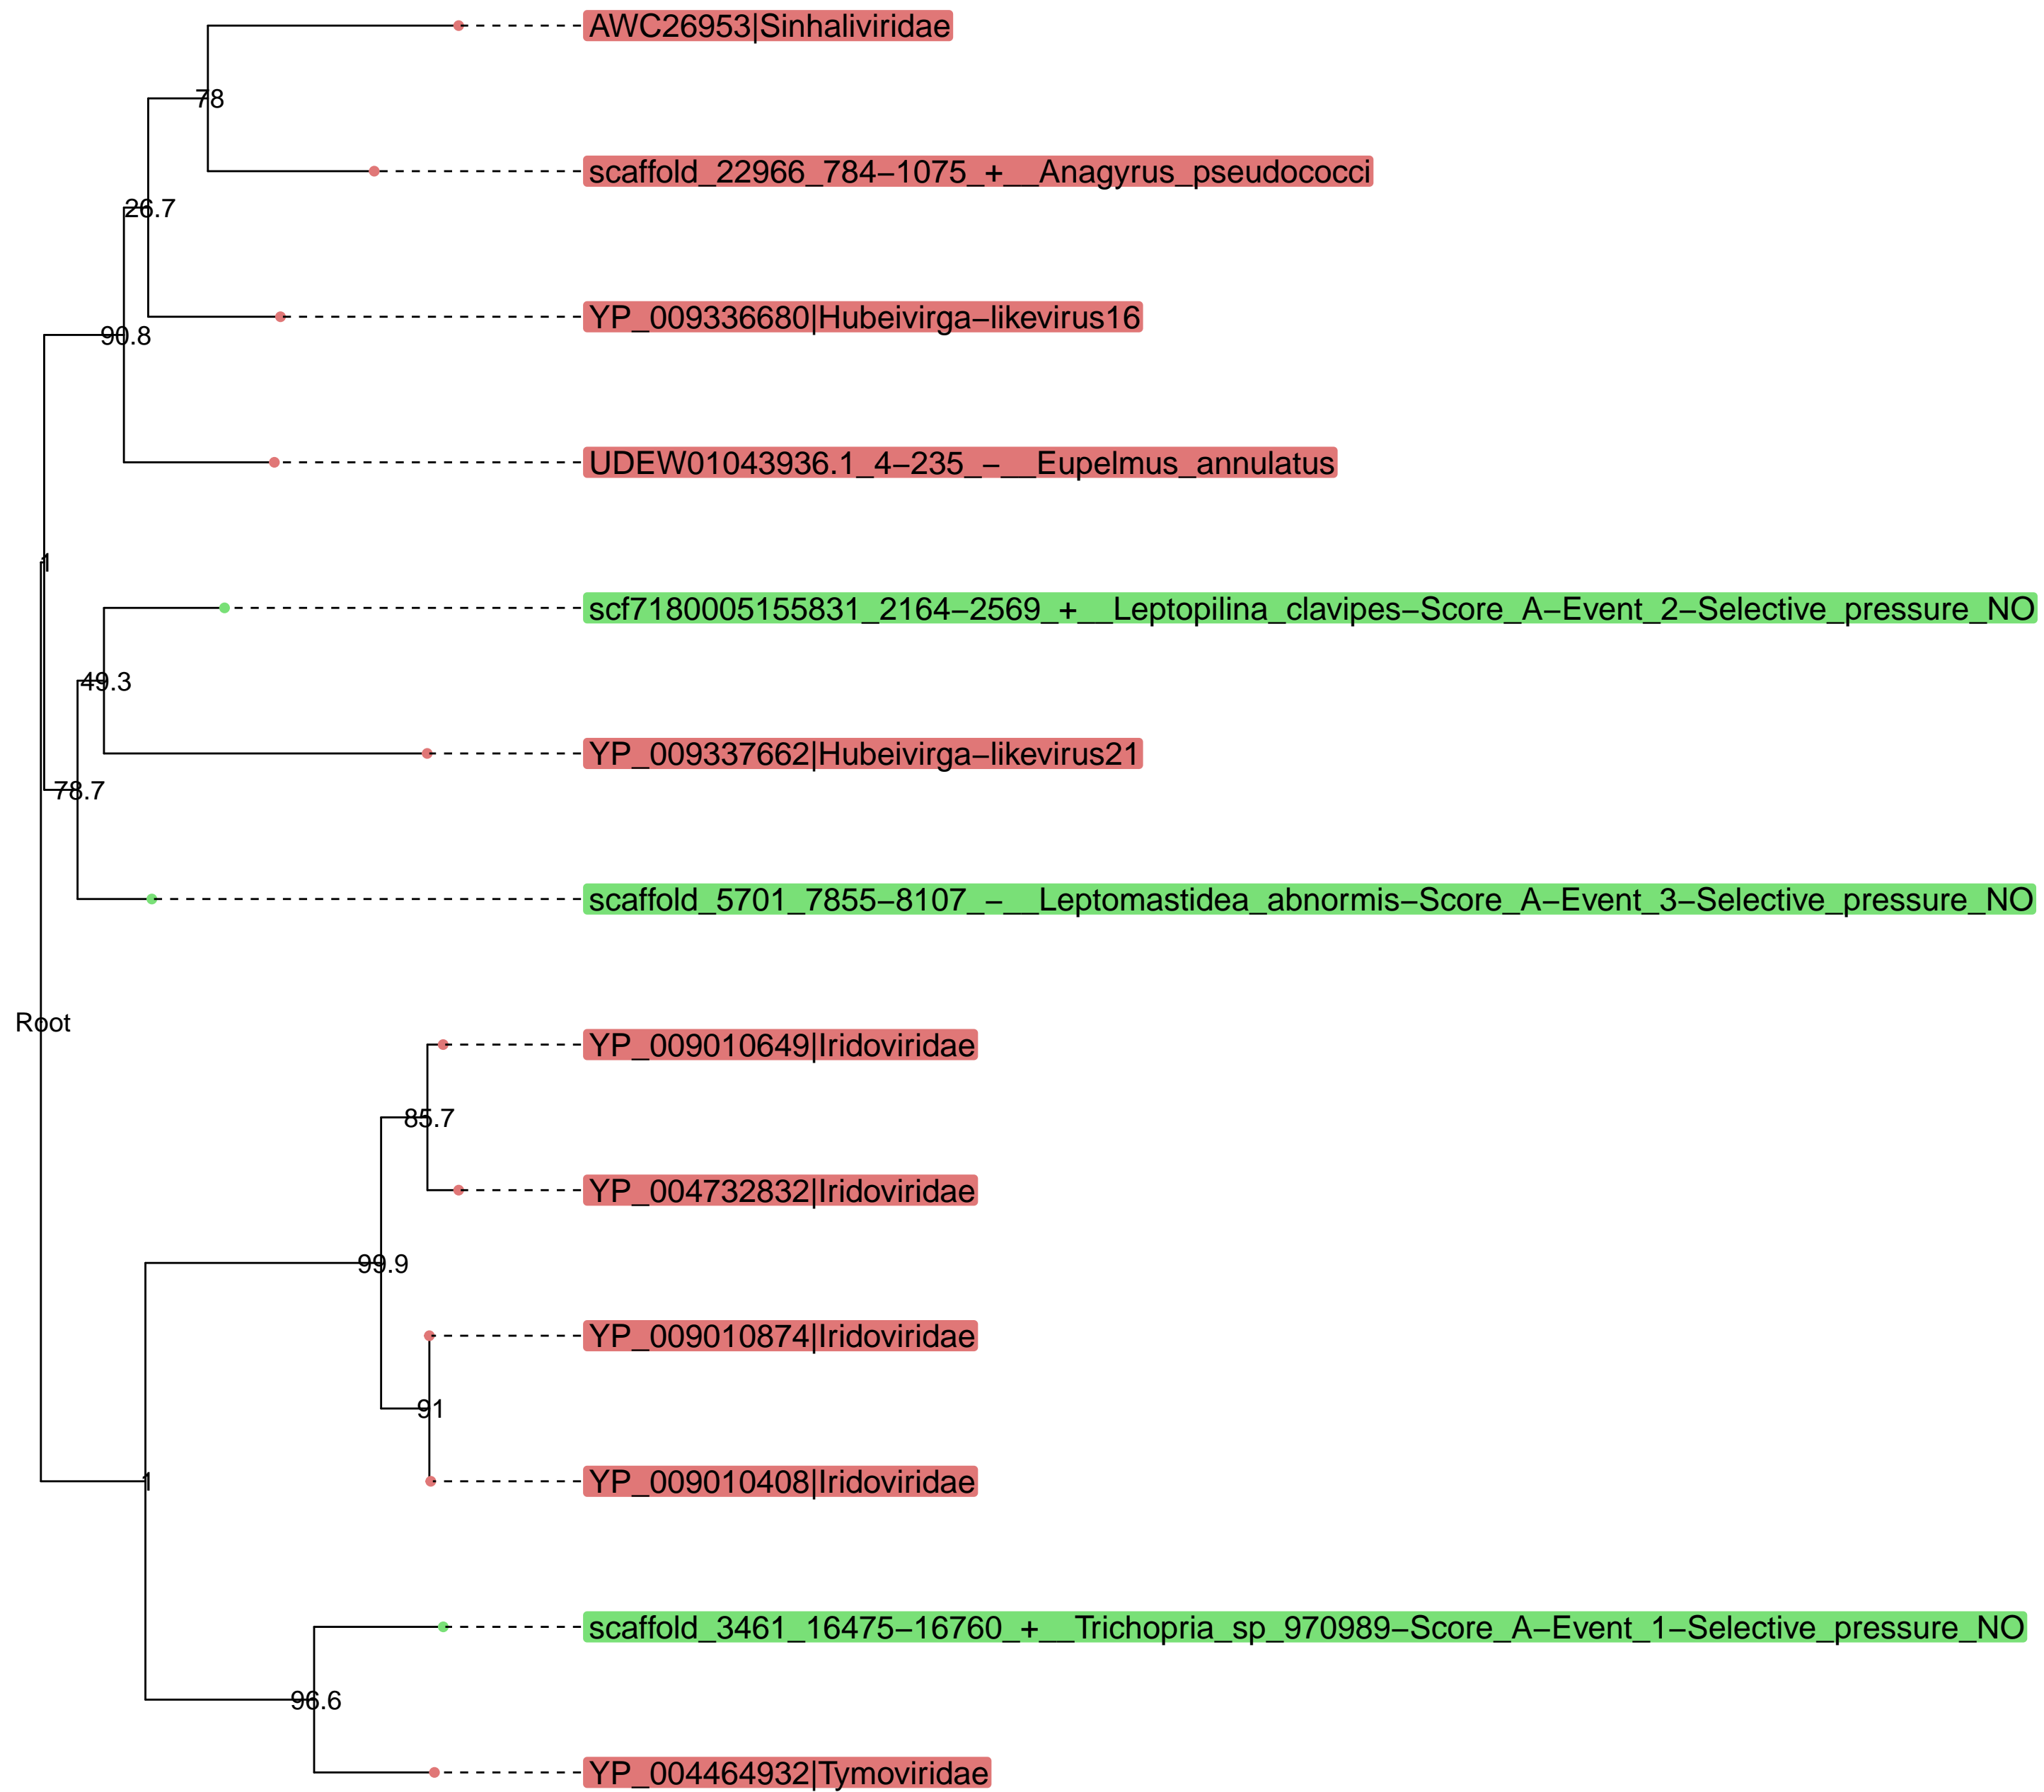

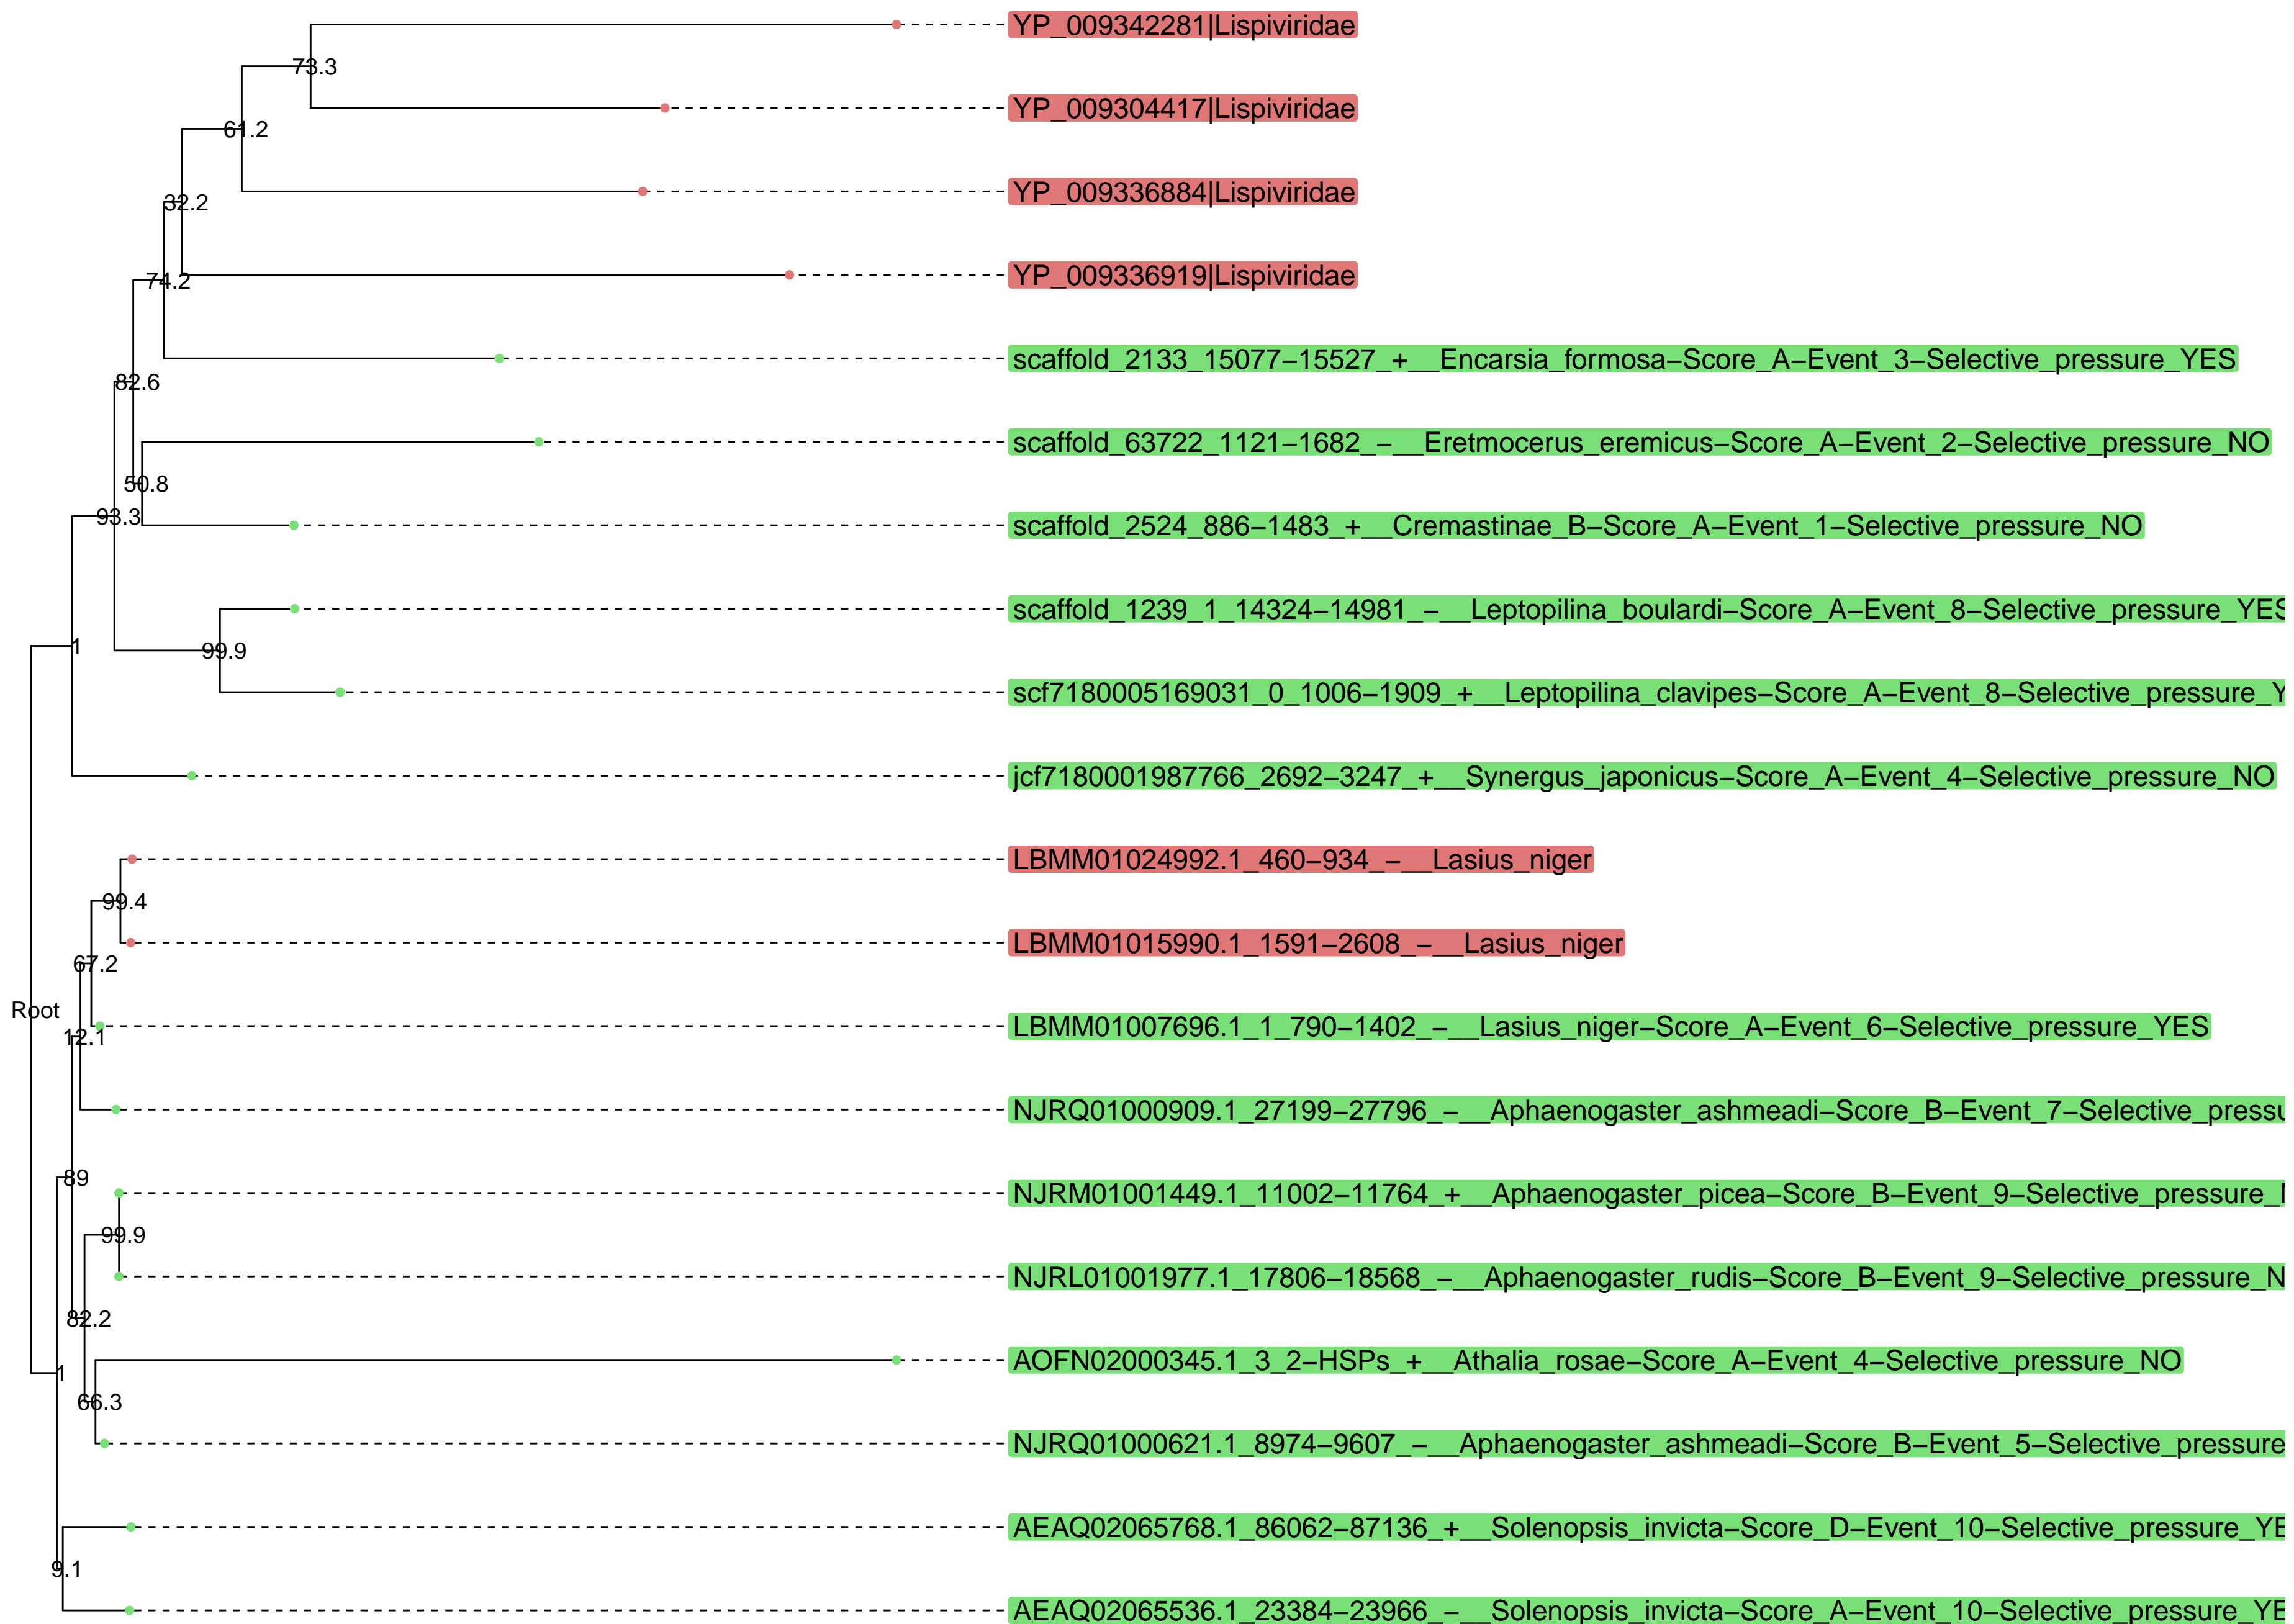

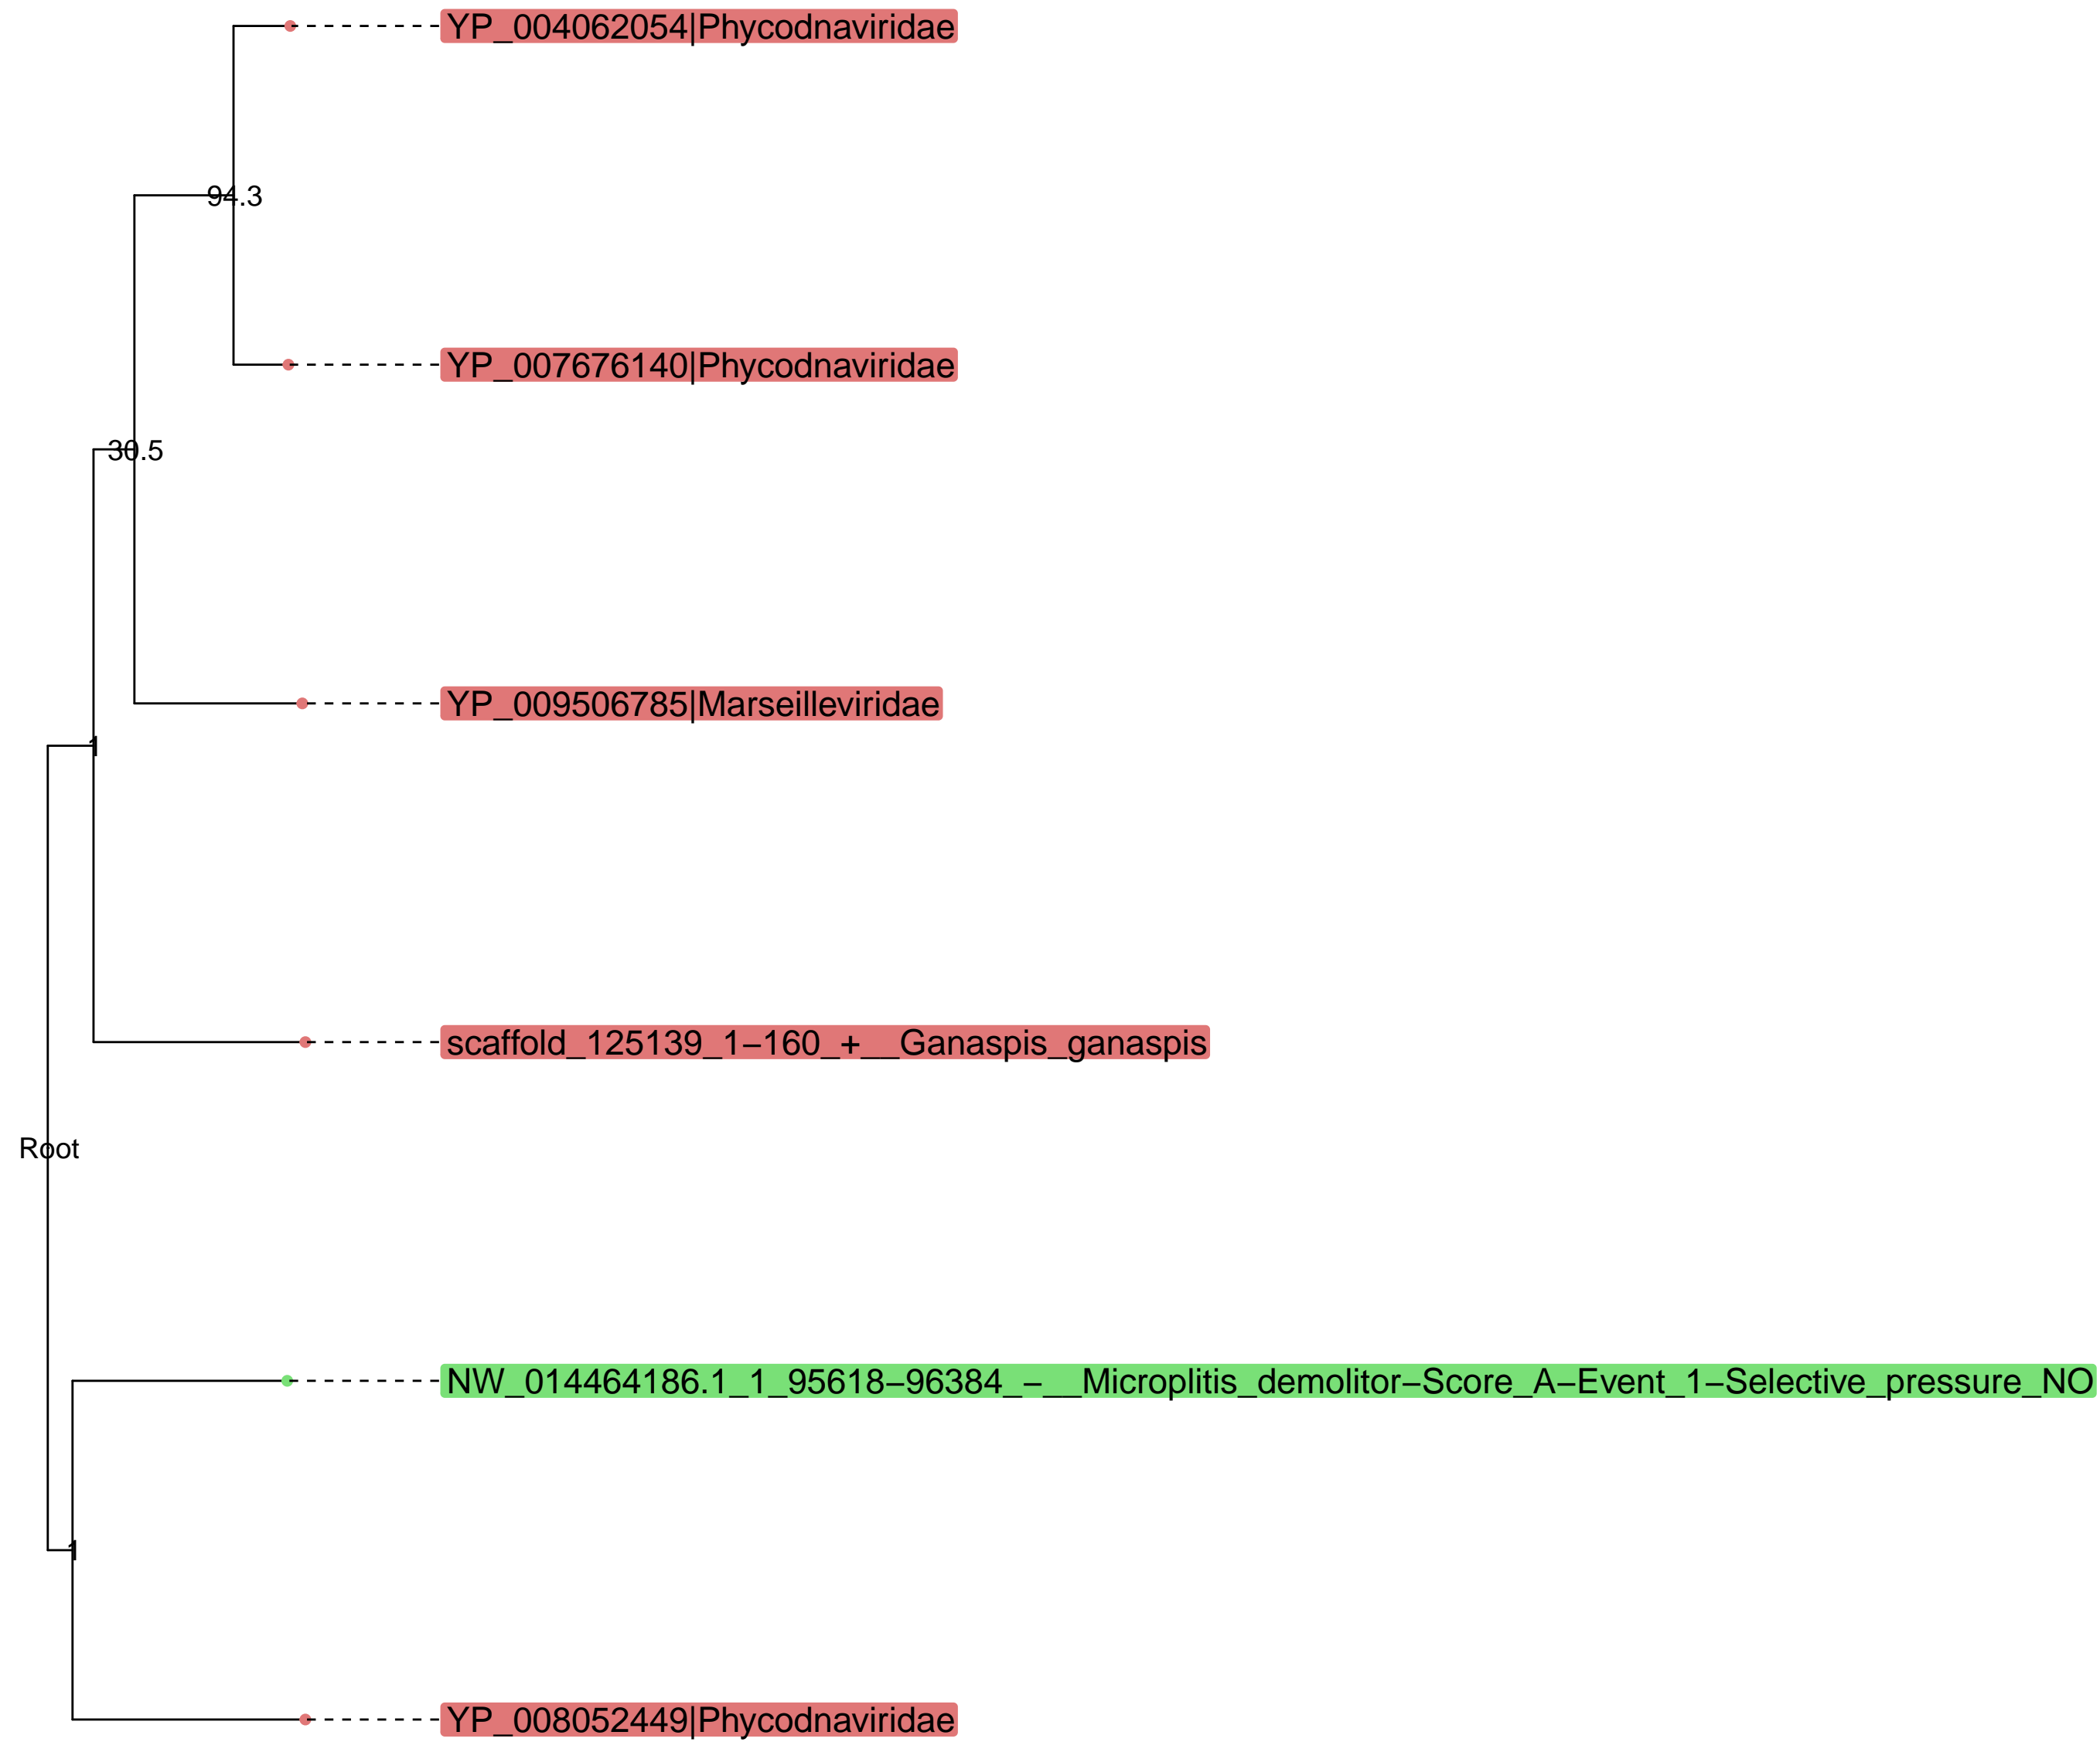

Cluster15744 - families involved : ['Reoviridae'] - putative protein : ['RNA-directed RNA polymerase (EC 2.7.7.48)']

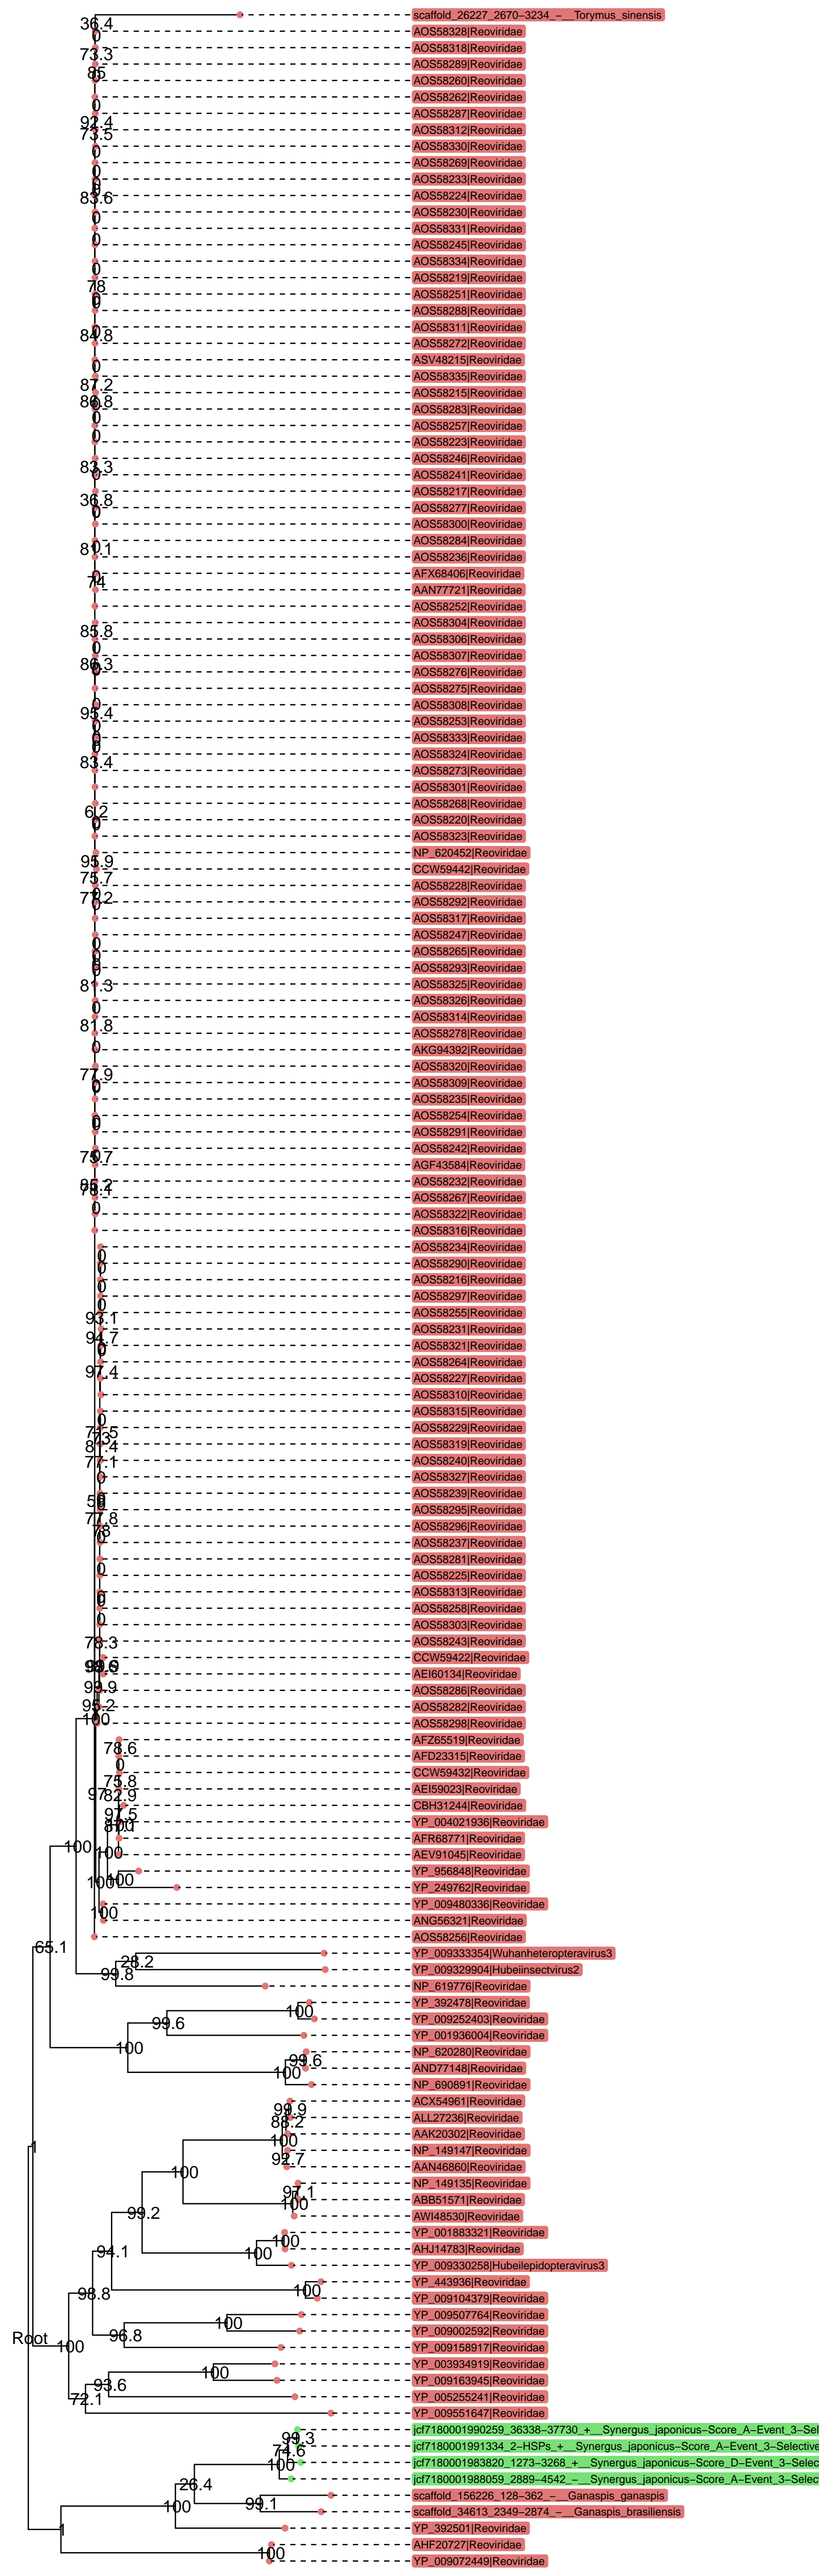

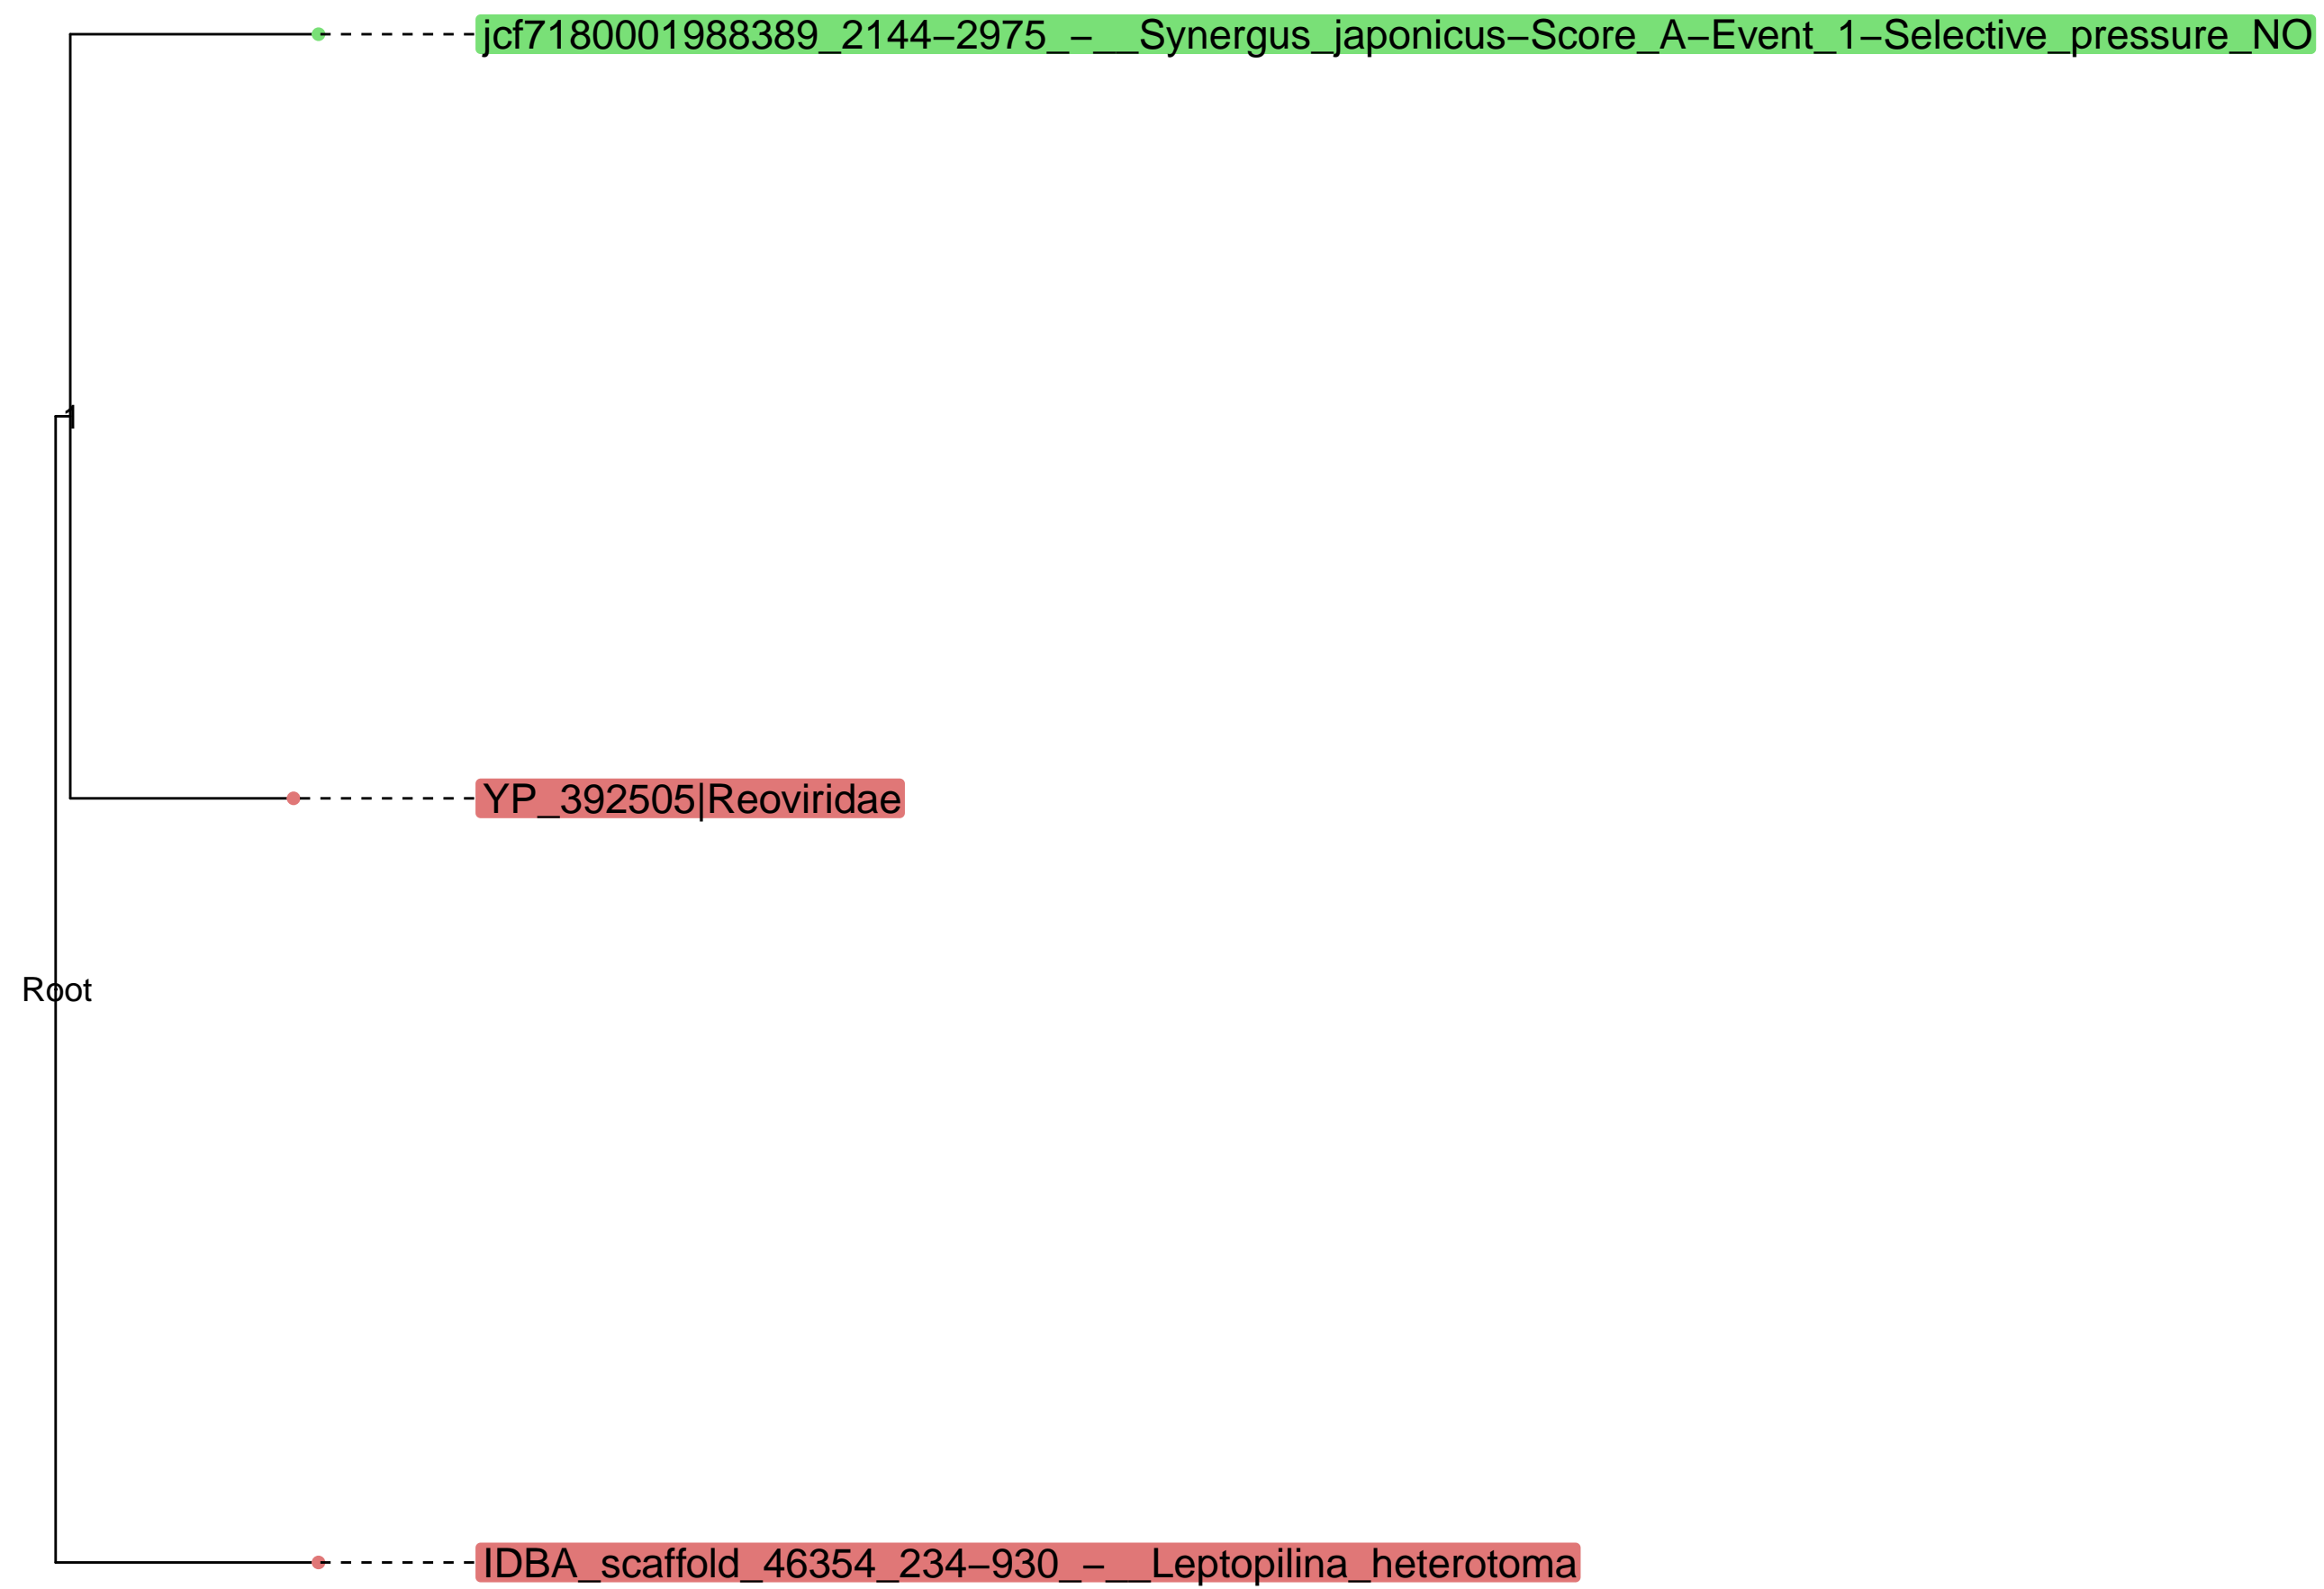

Cluster11354 – families involved : ['Baculoviridae'] – putative protein : ['Uncharacterized protein']

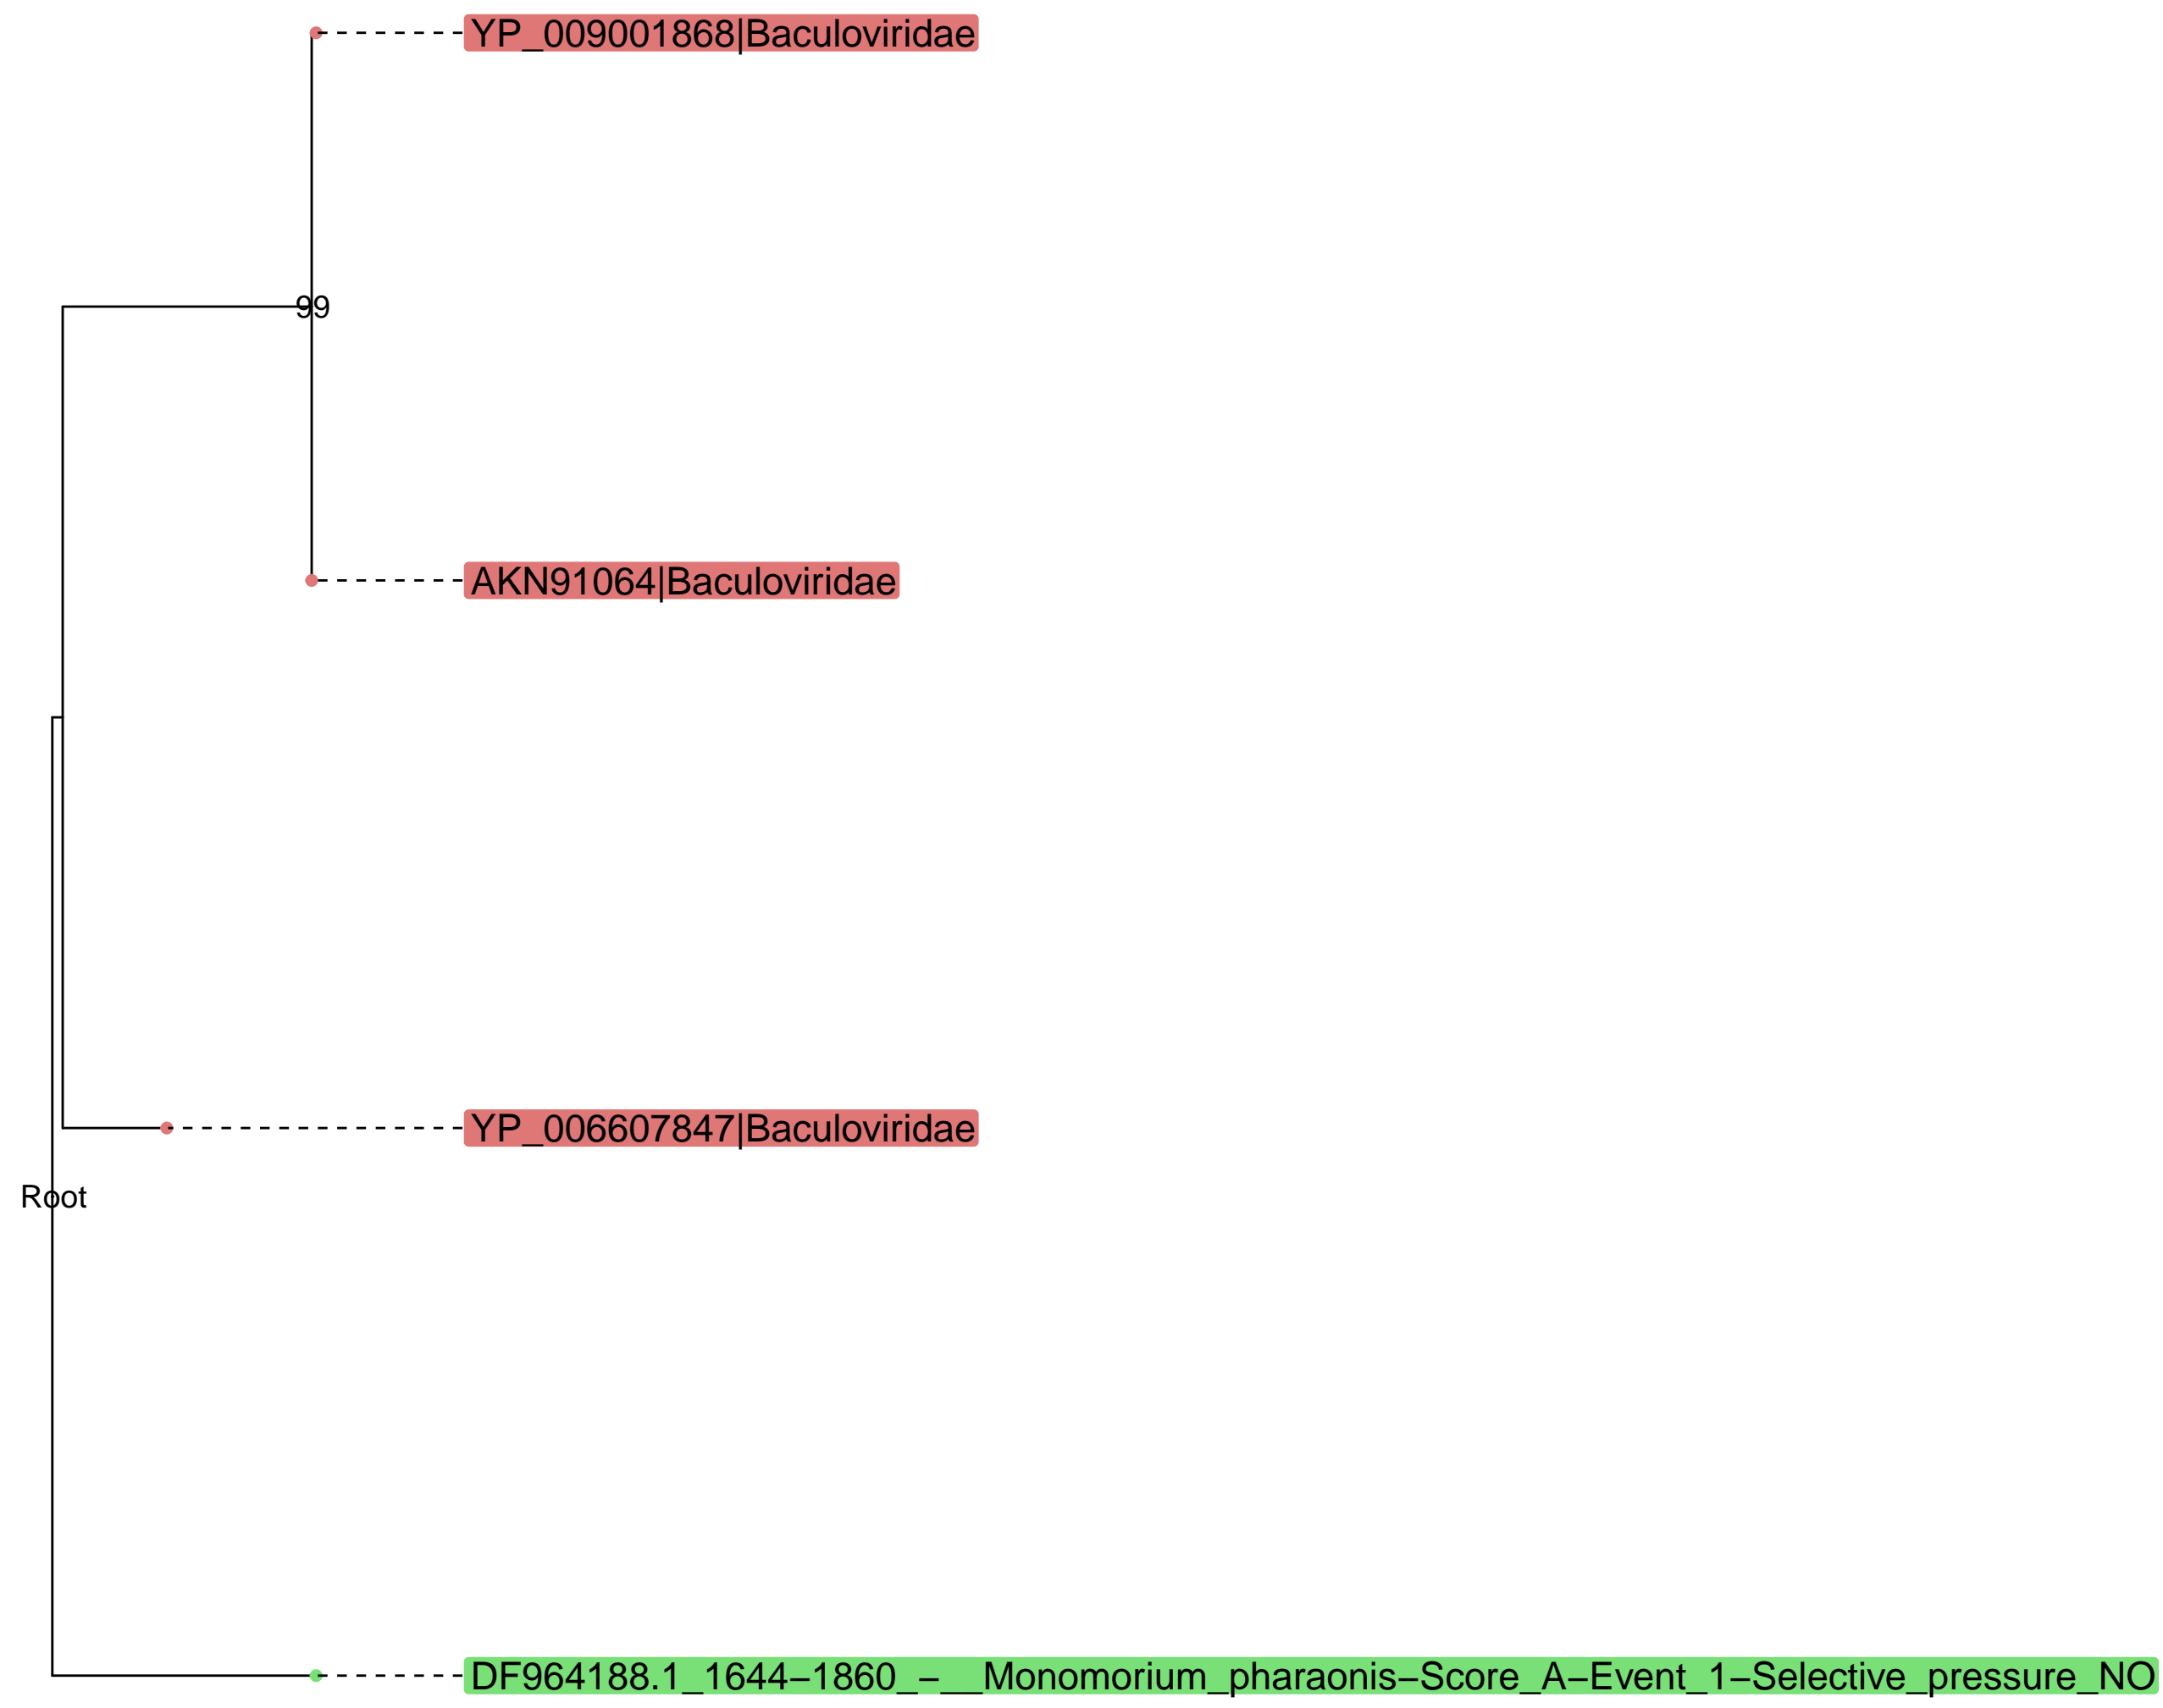

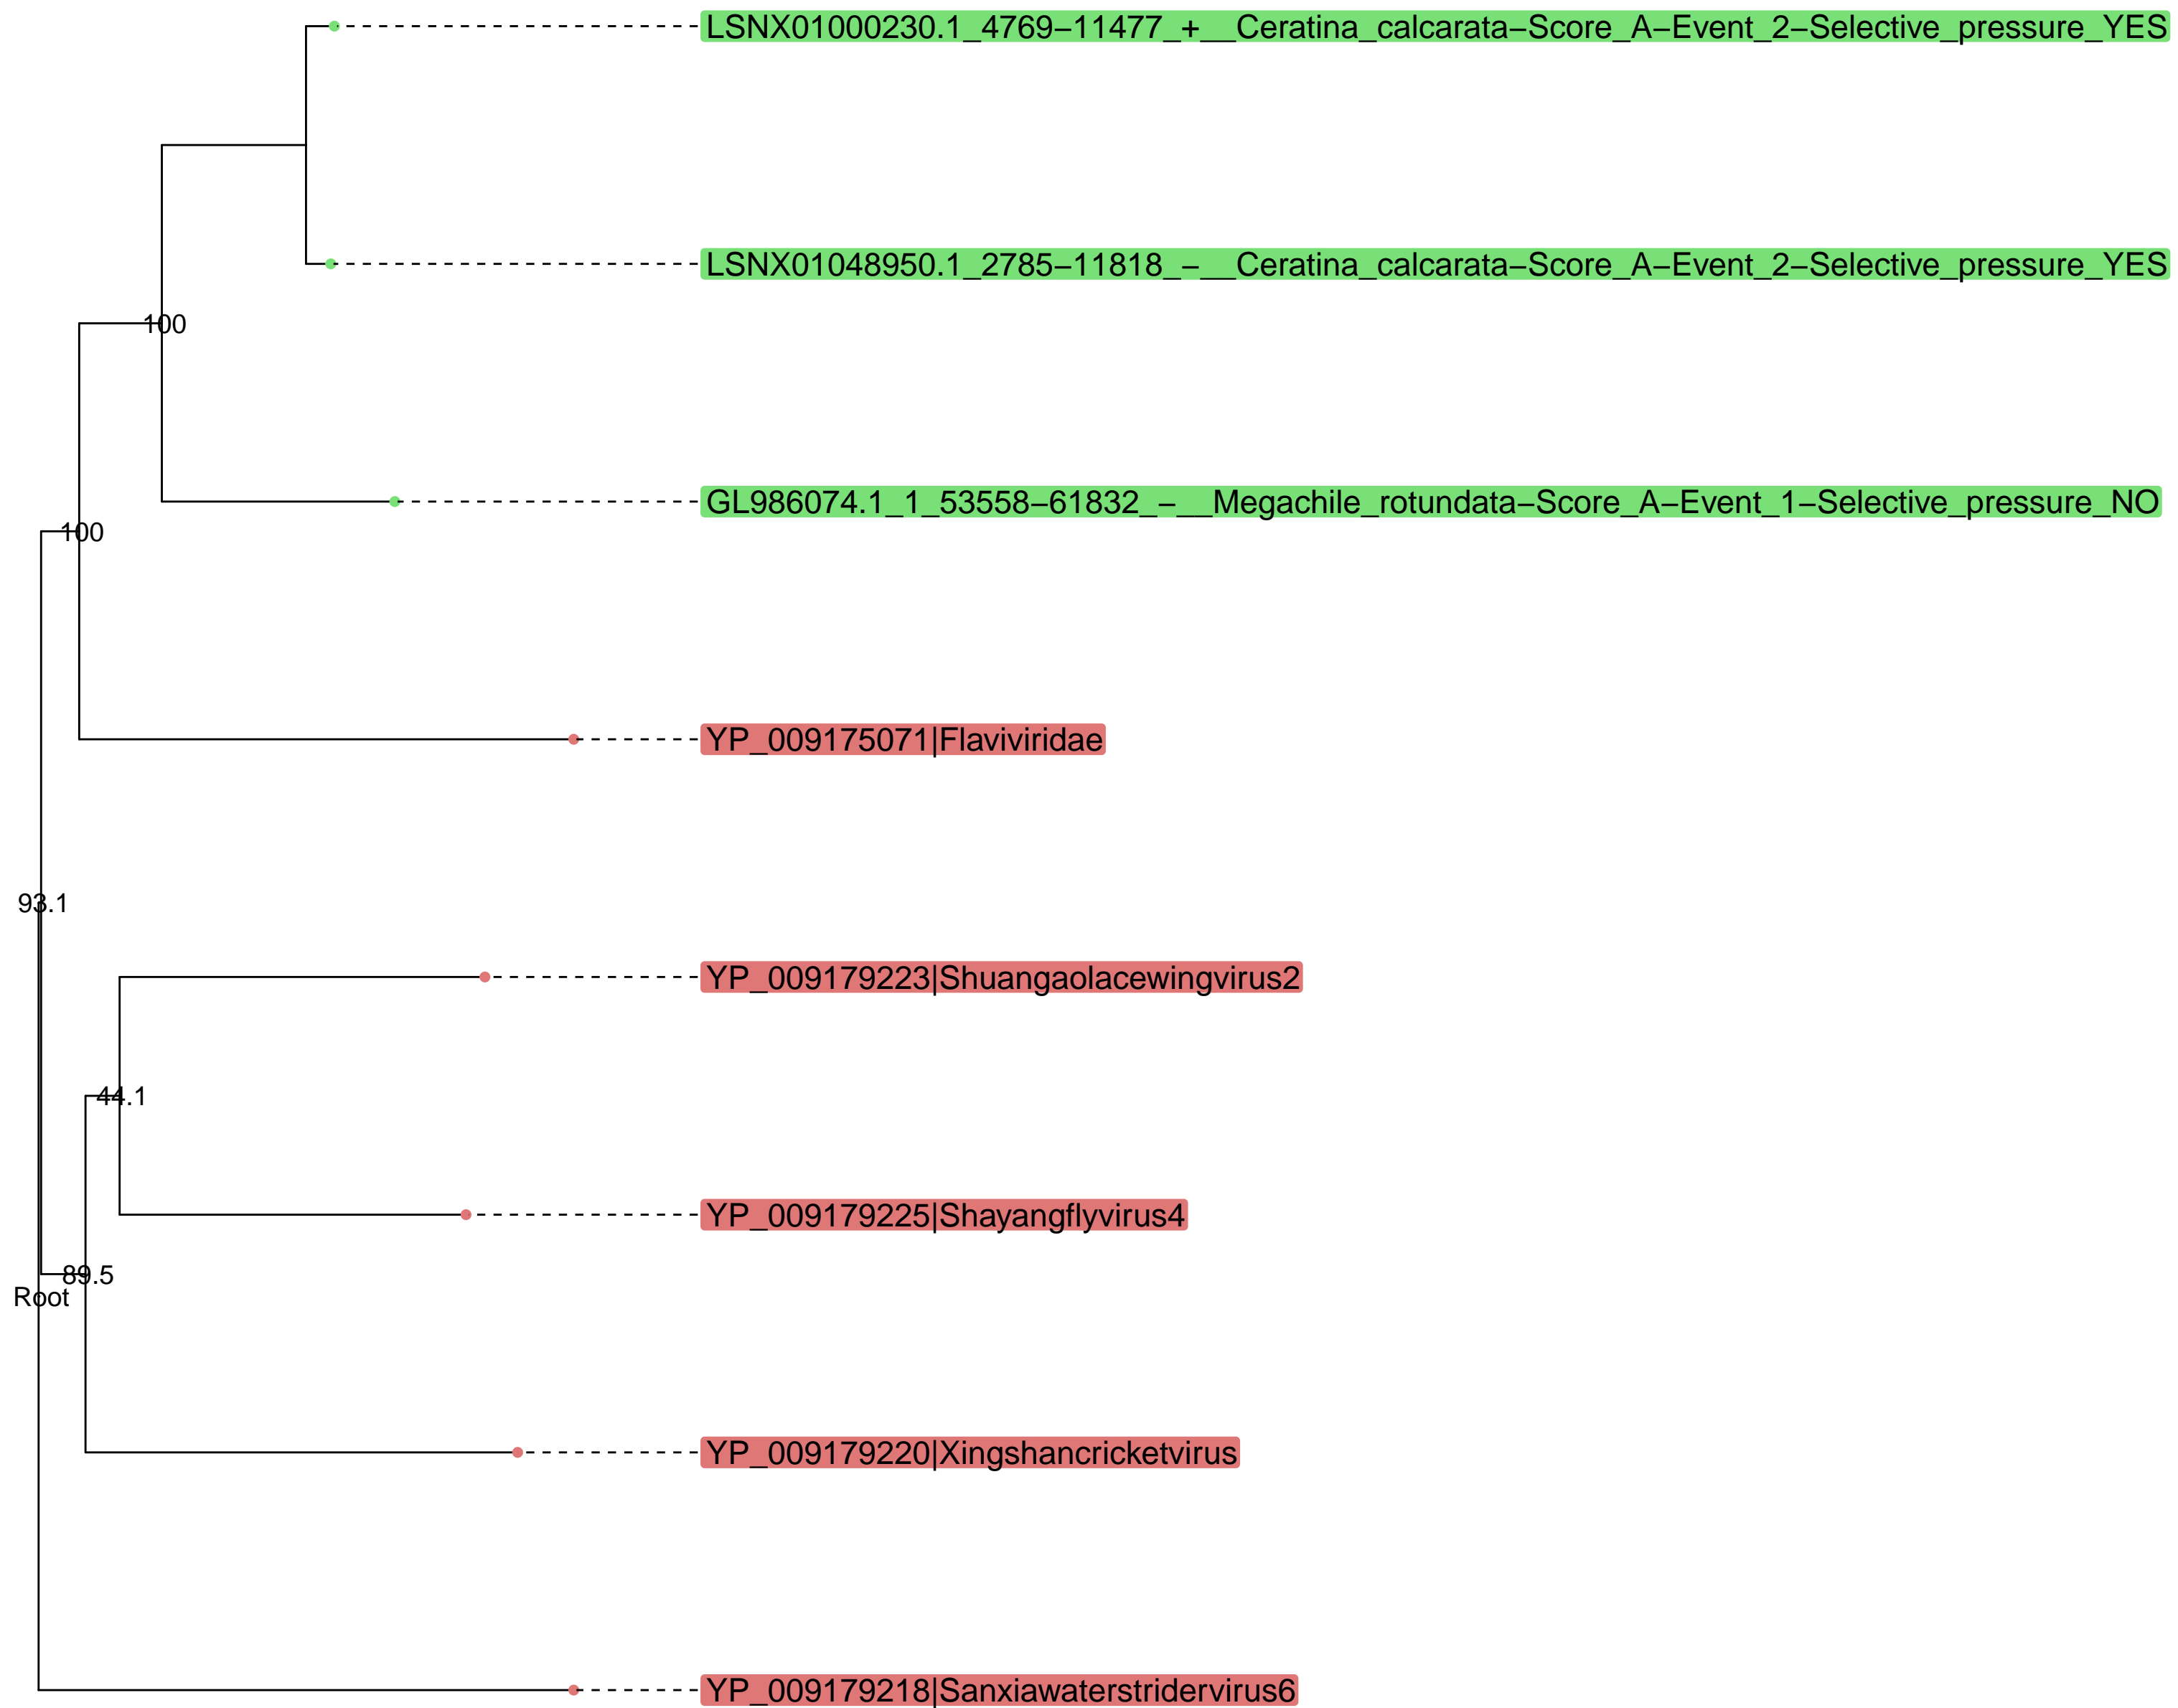



Cluster22220 – families involved : ['LbFV\_like'] – putative protein : ['Family of unknown function (DUF5422)']

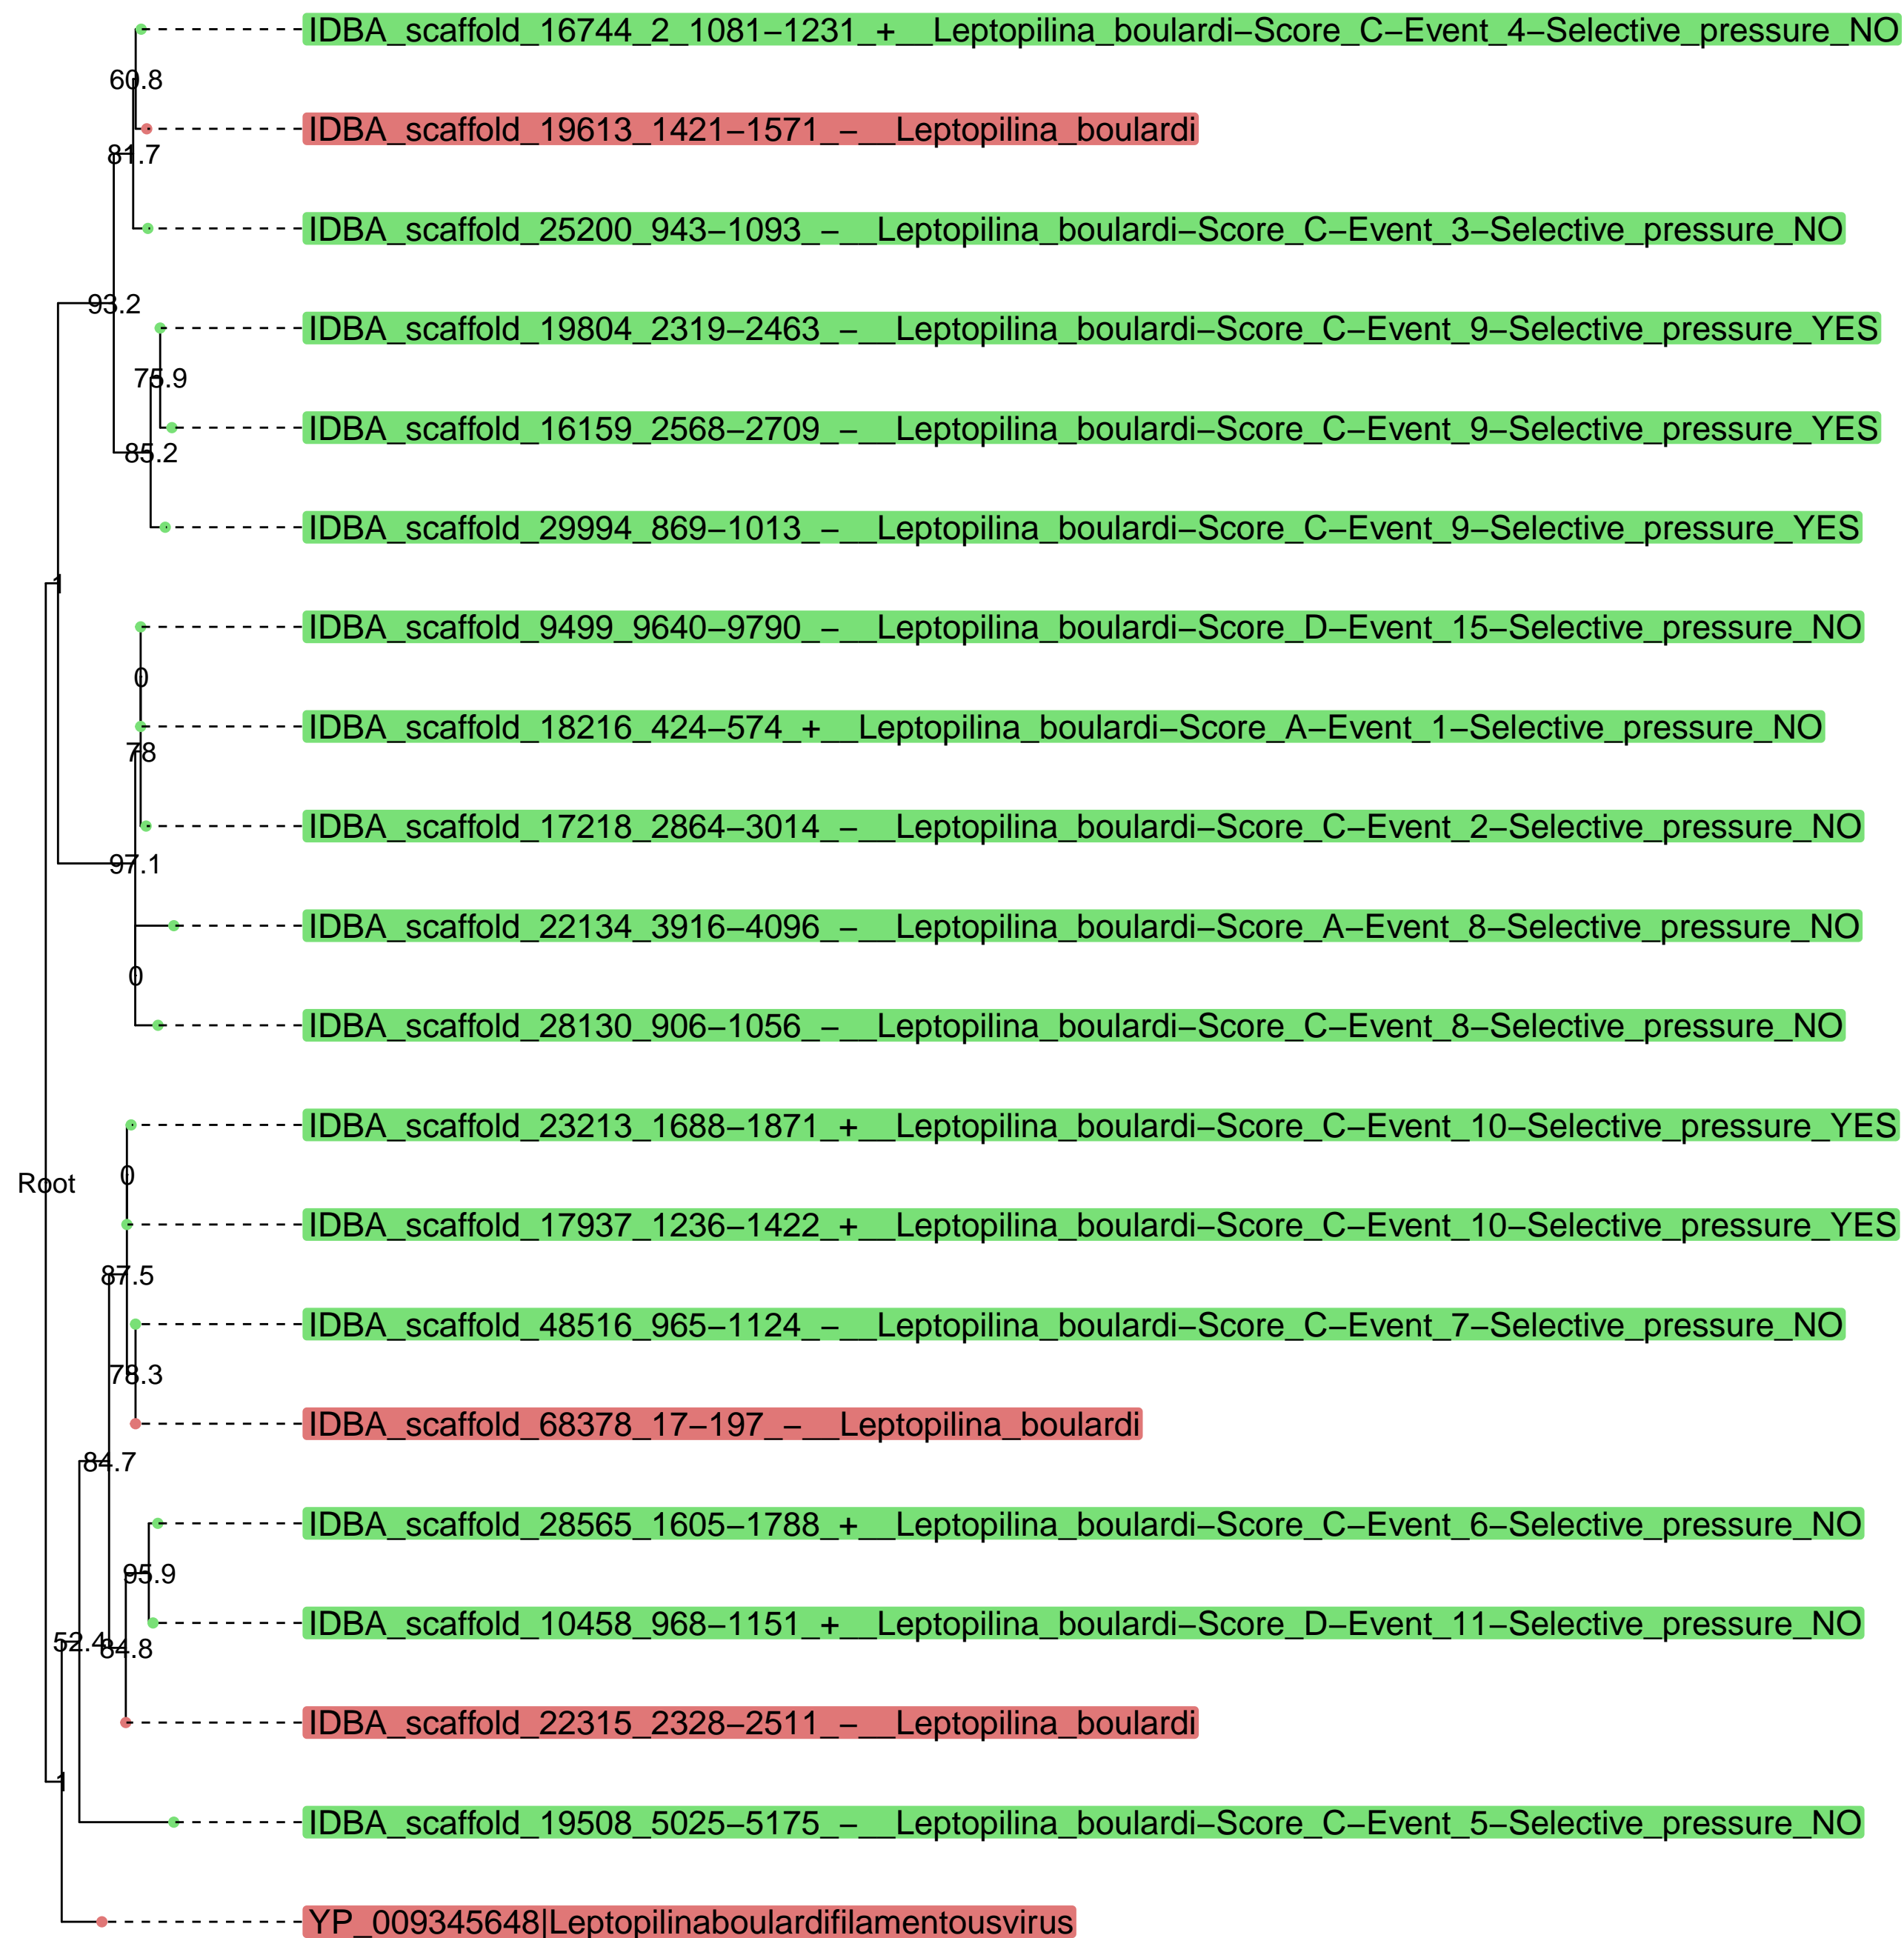

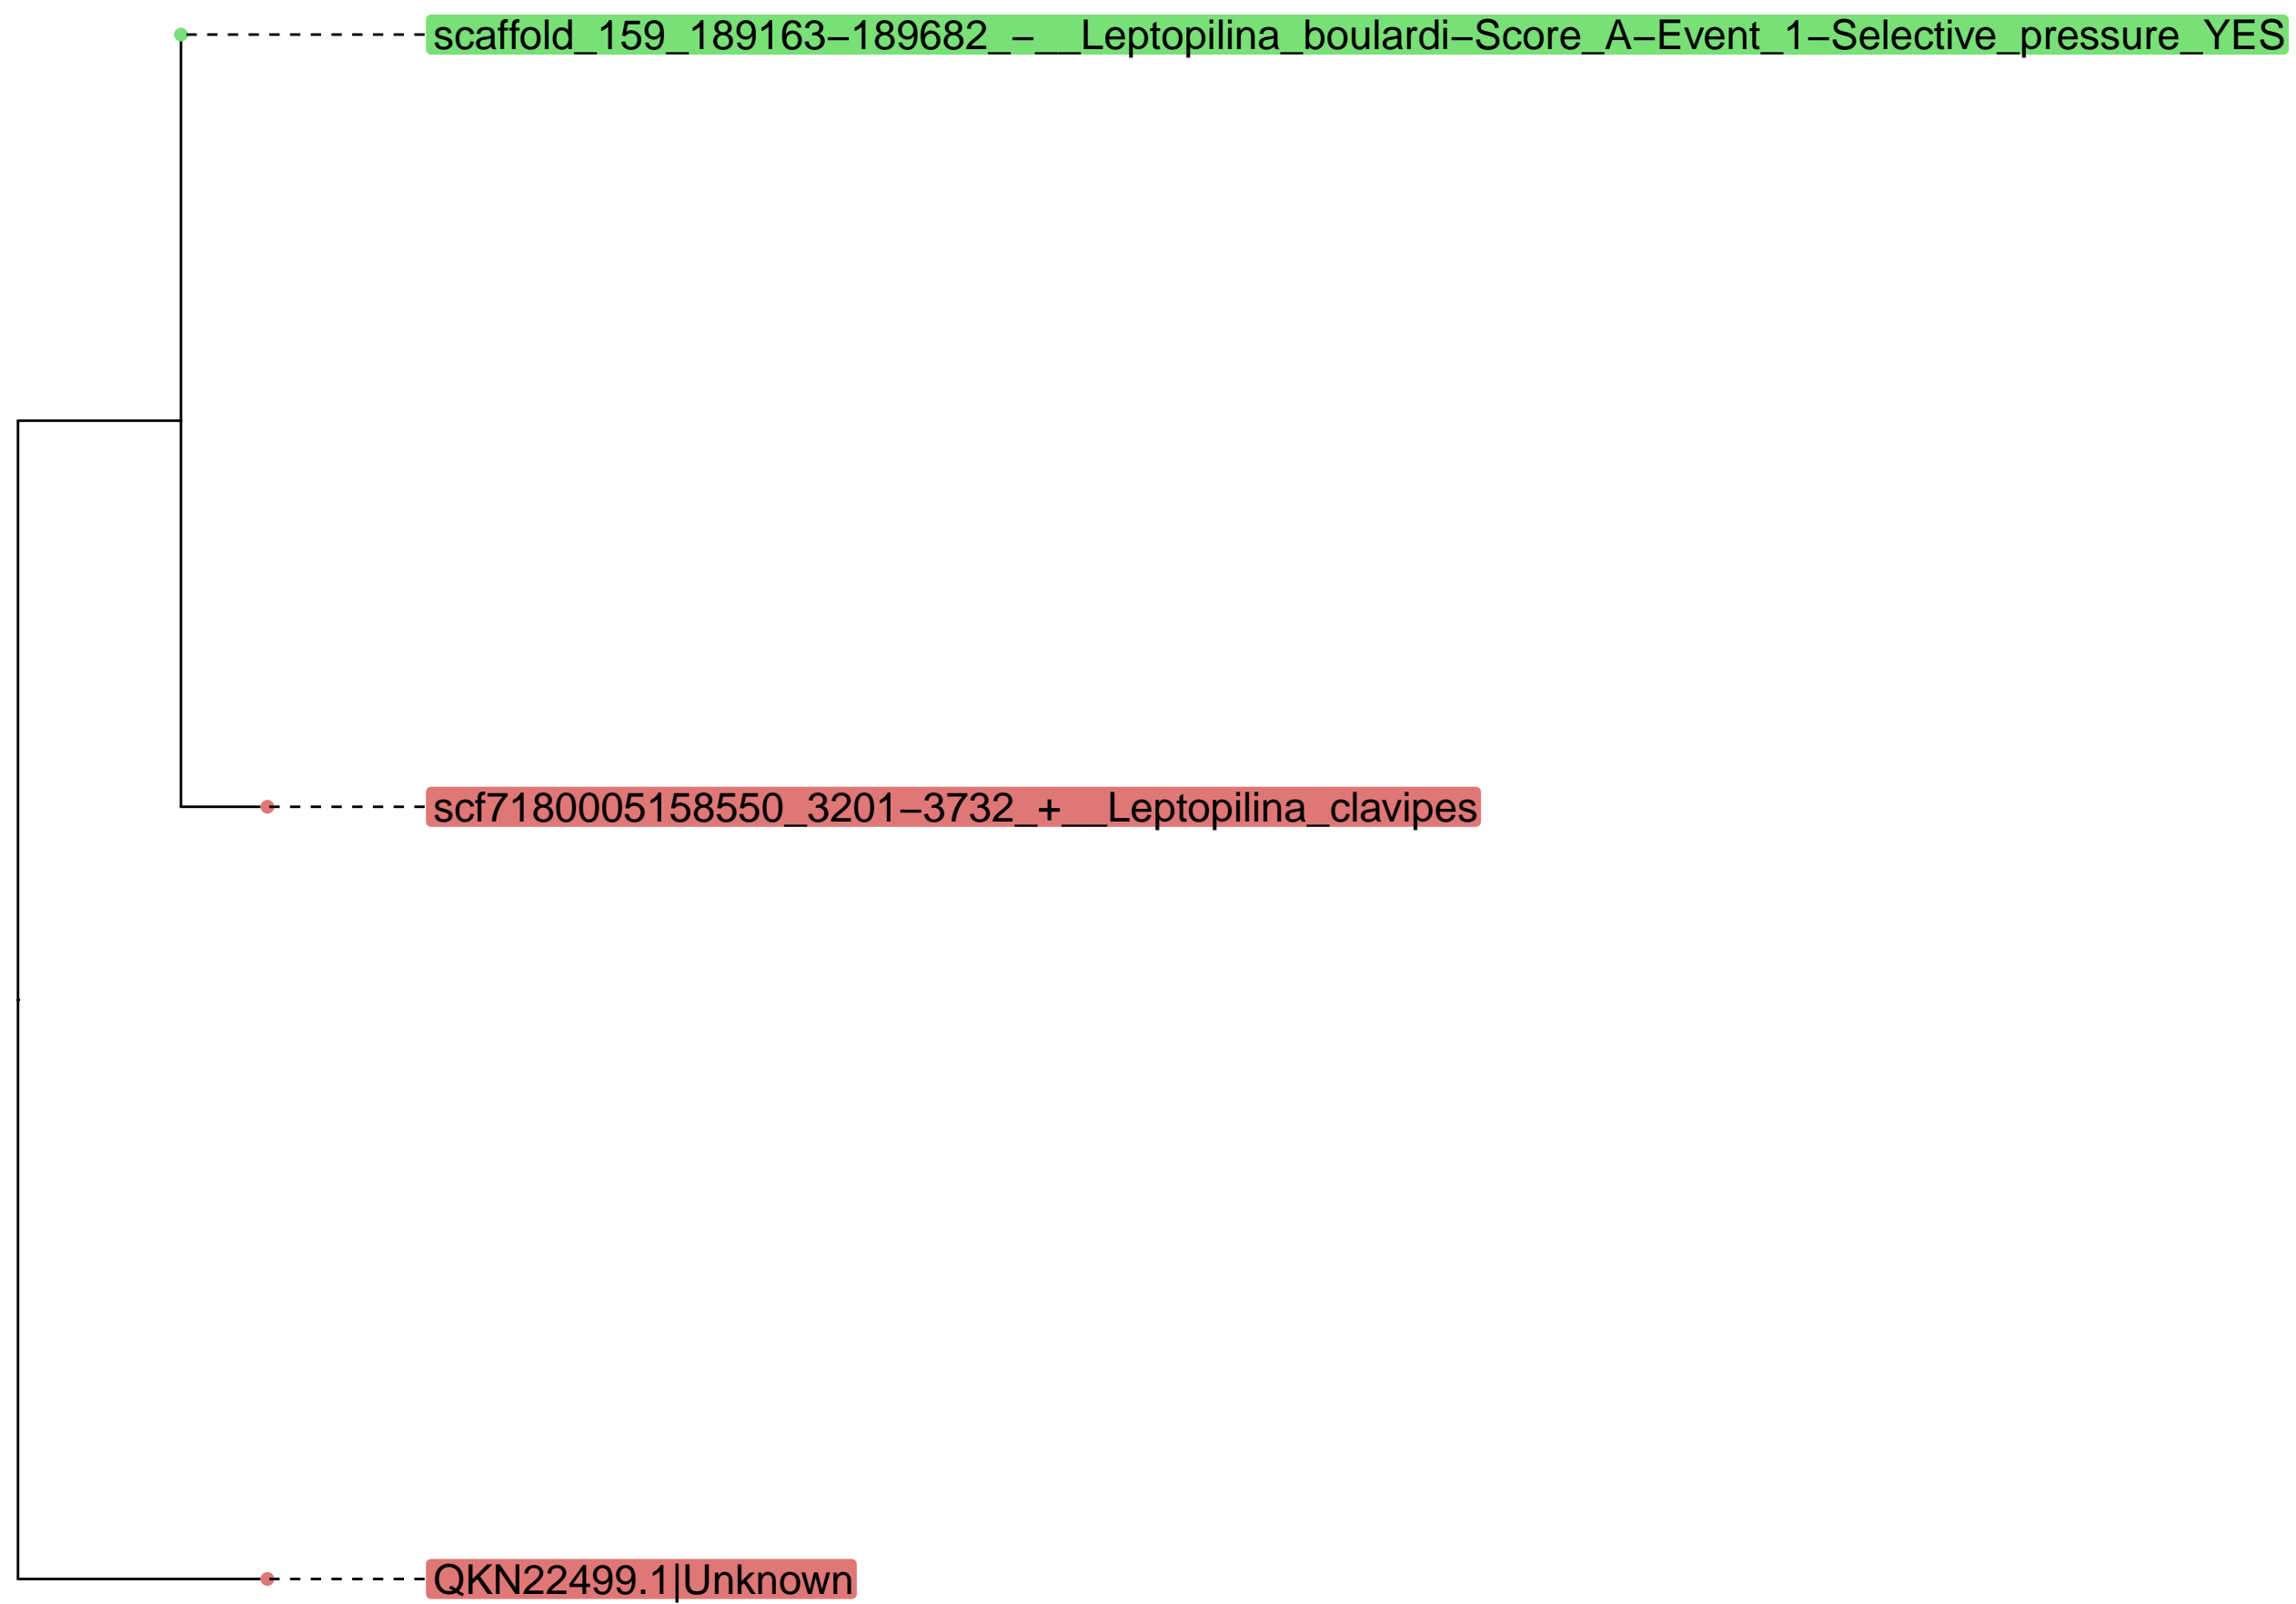

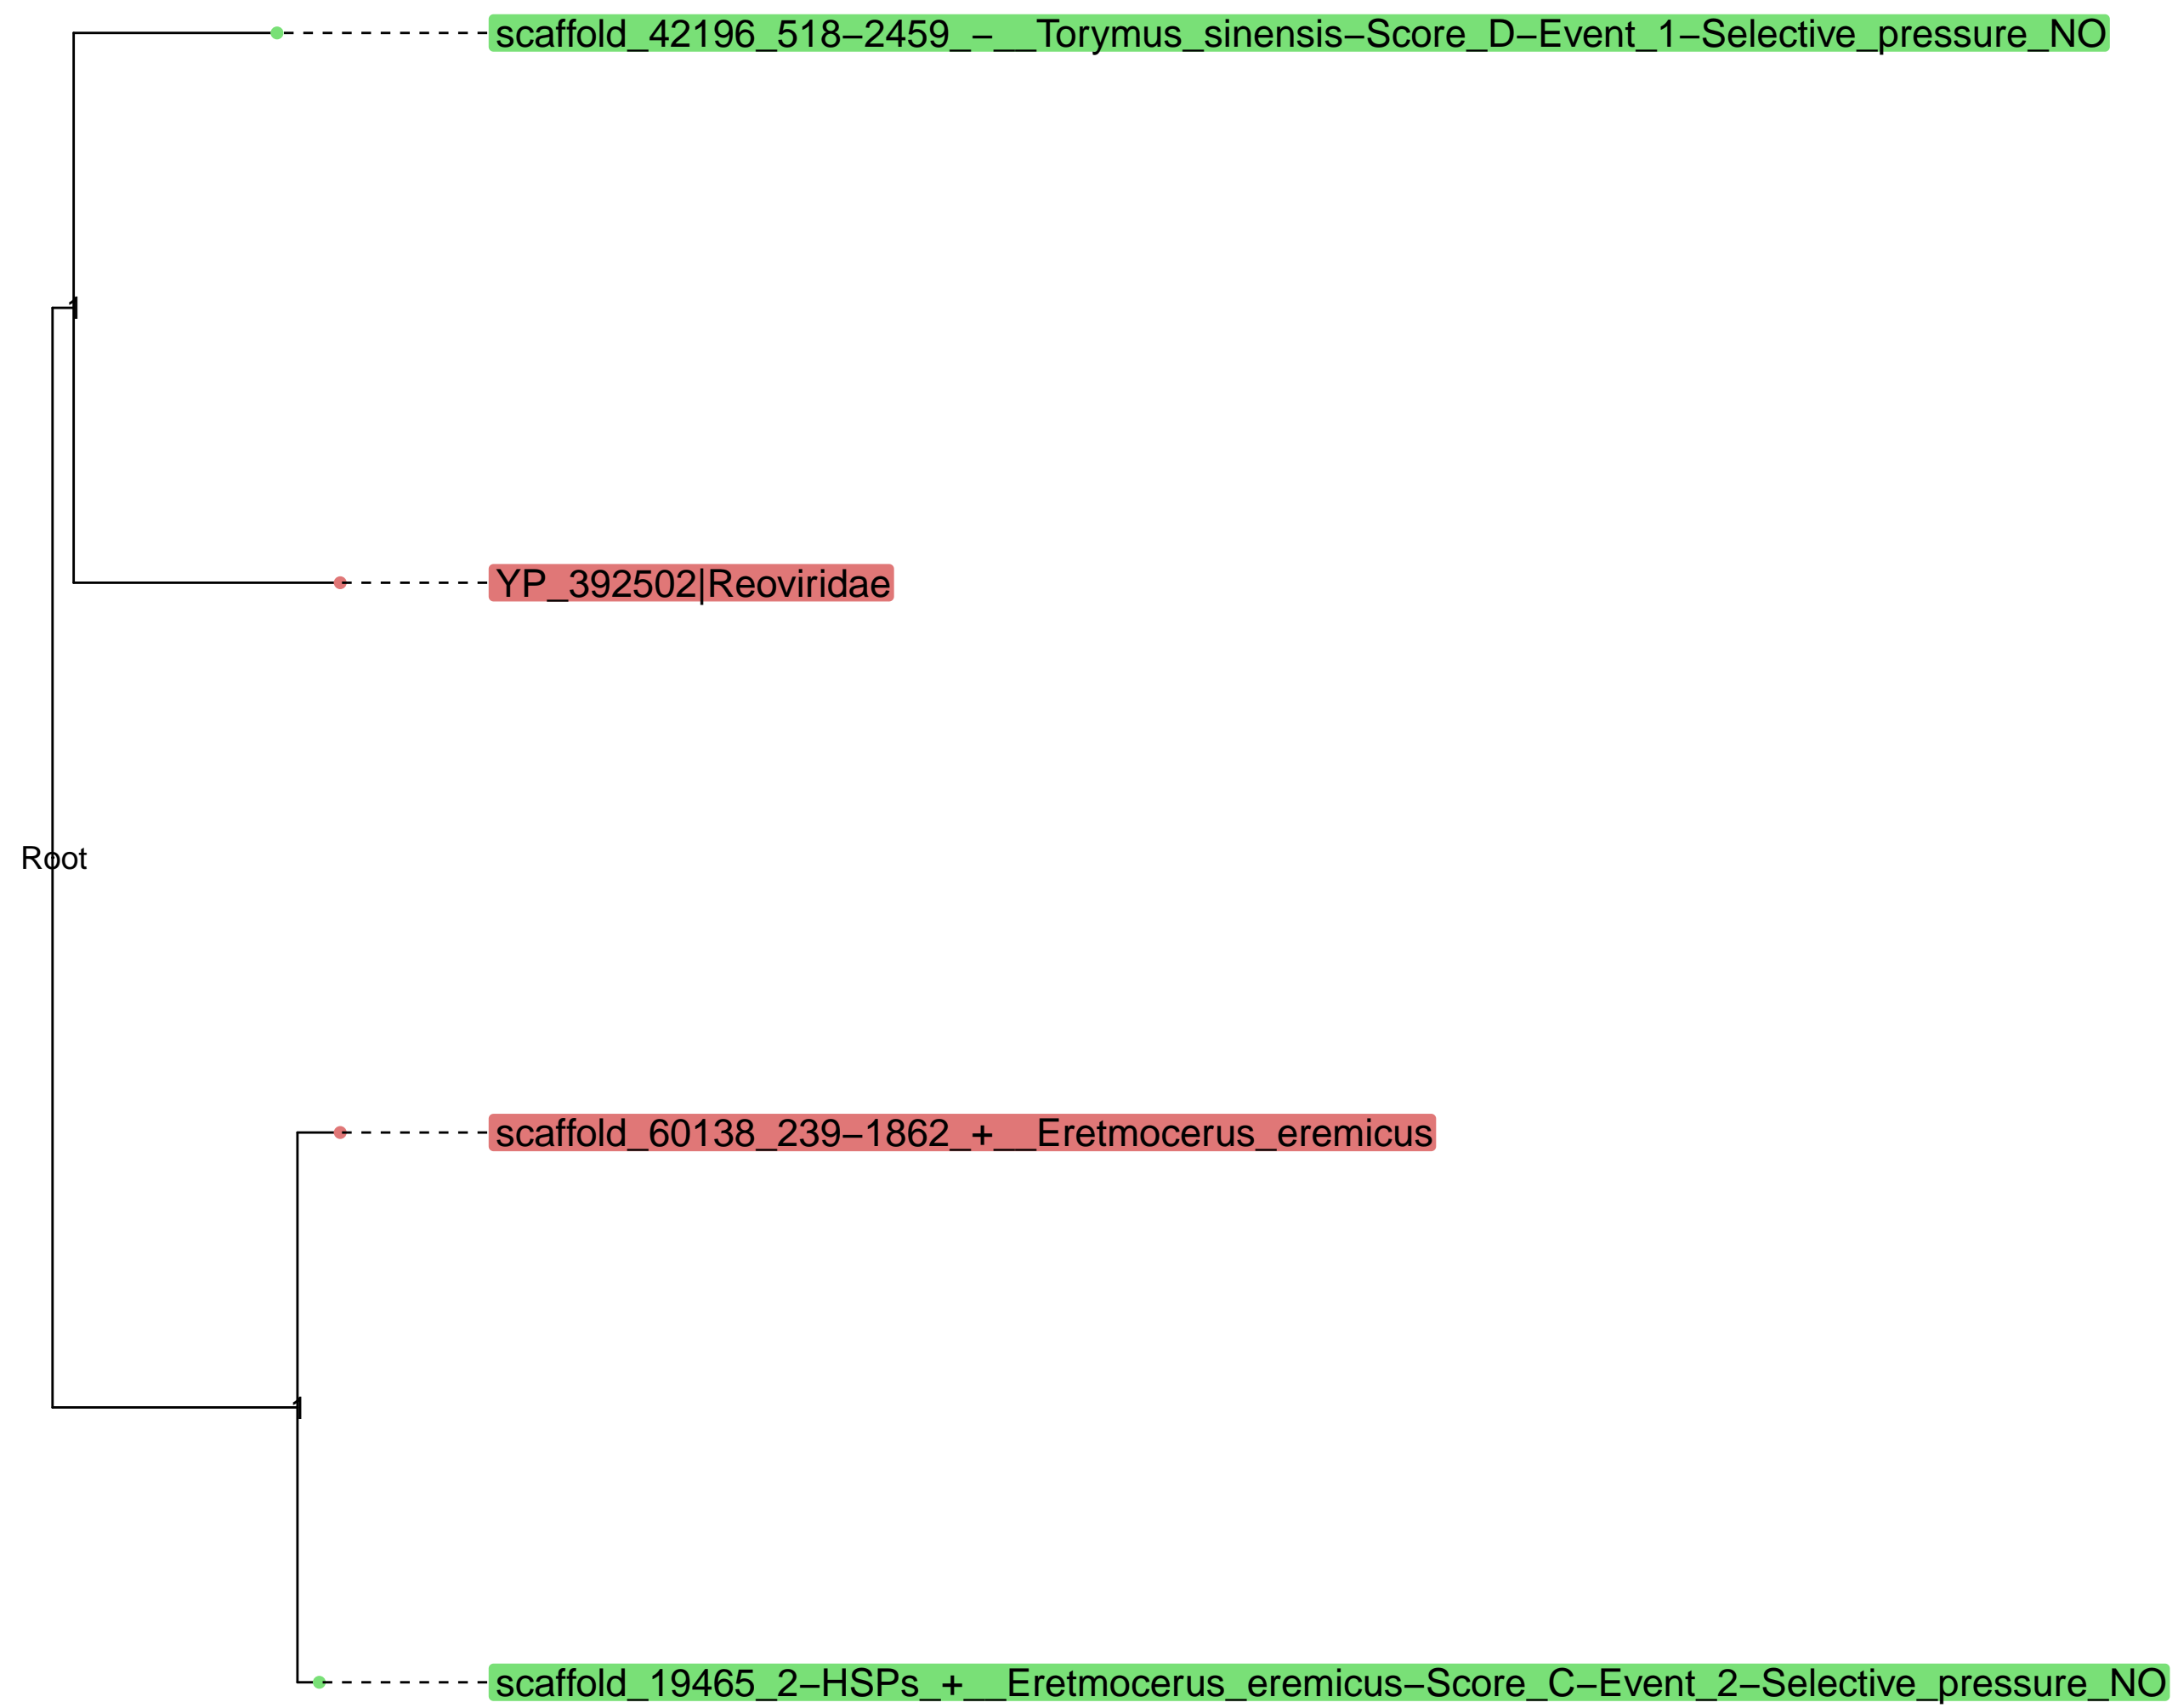

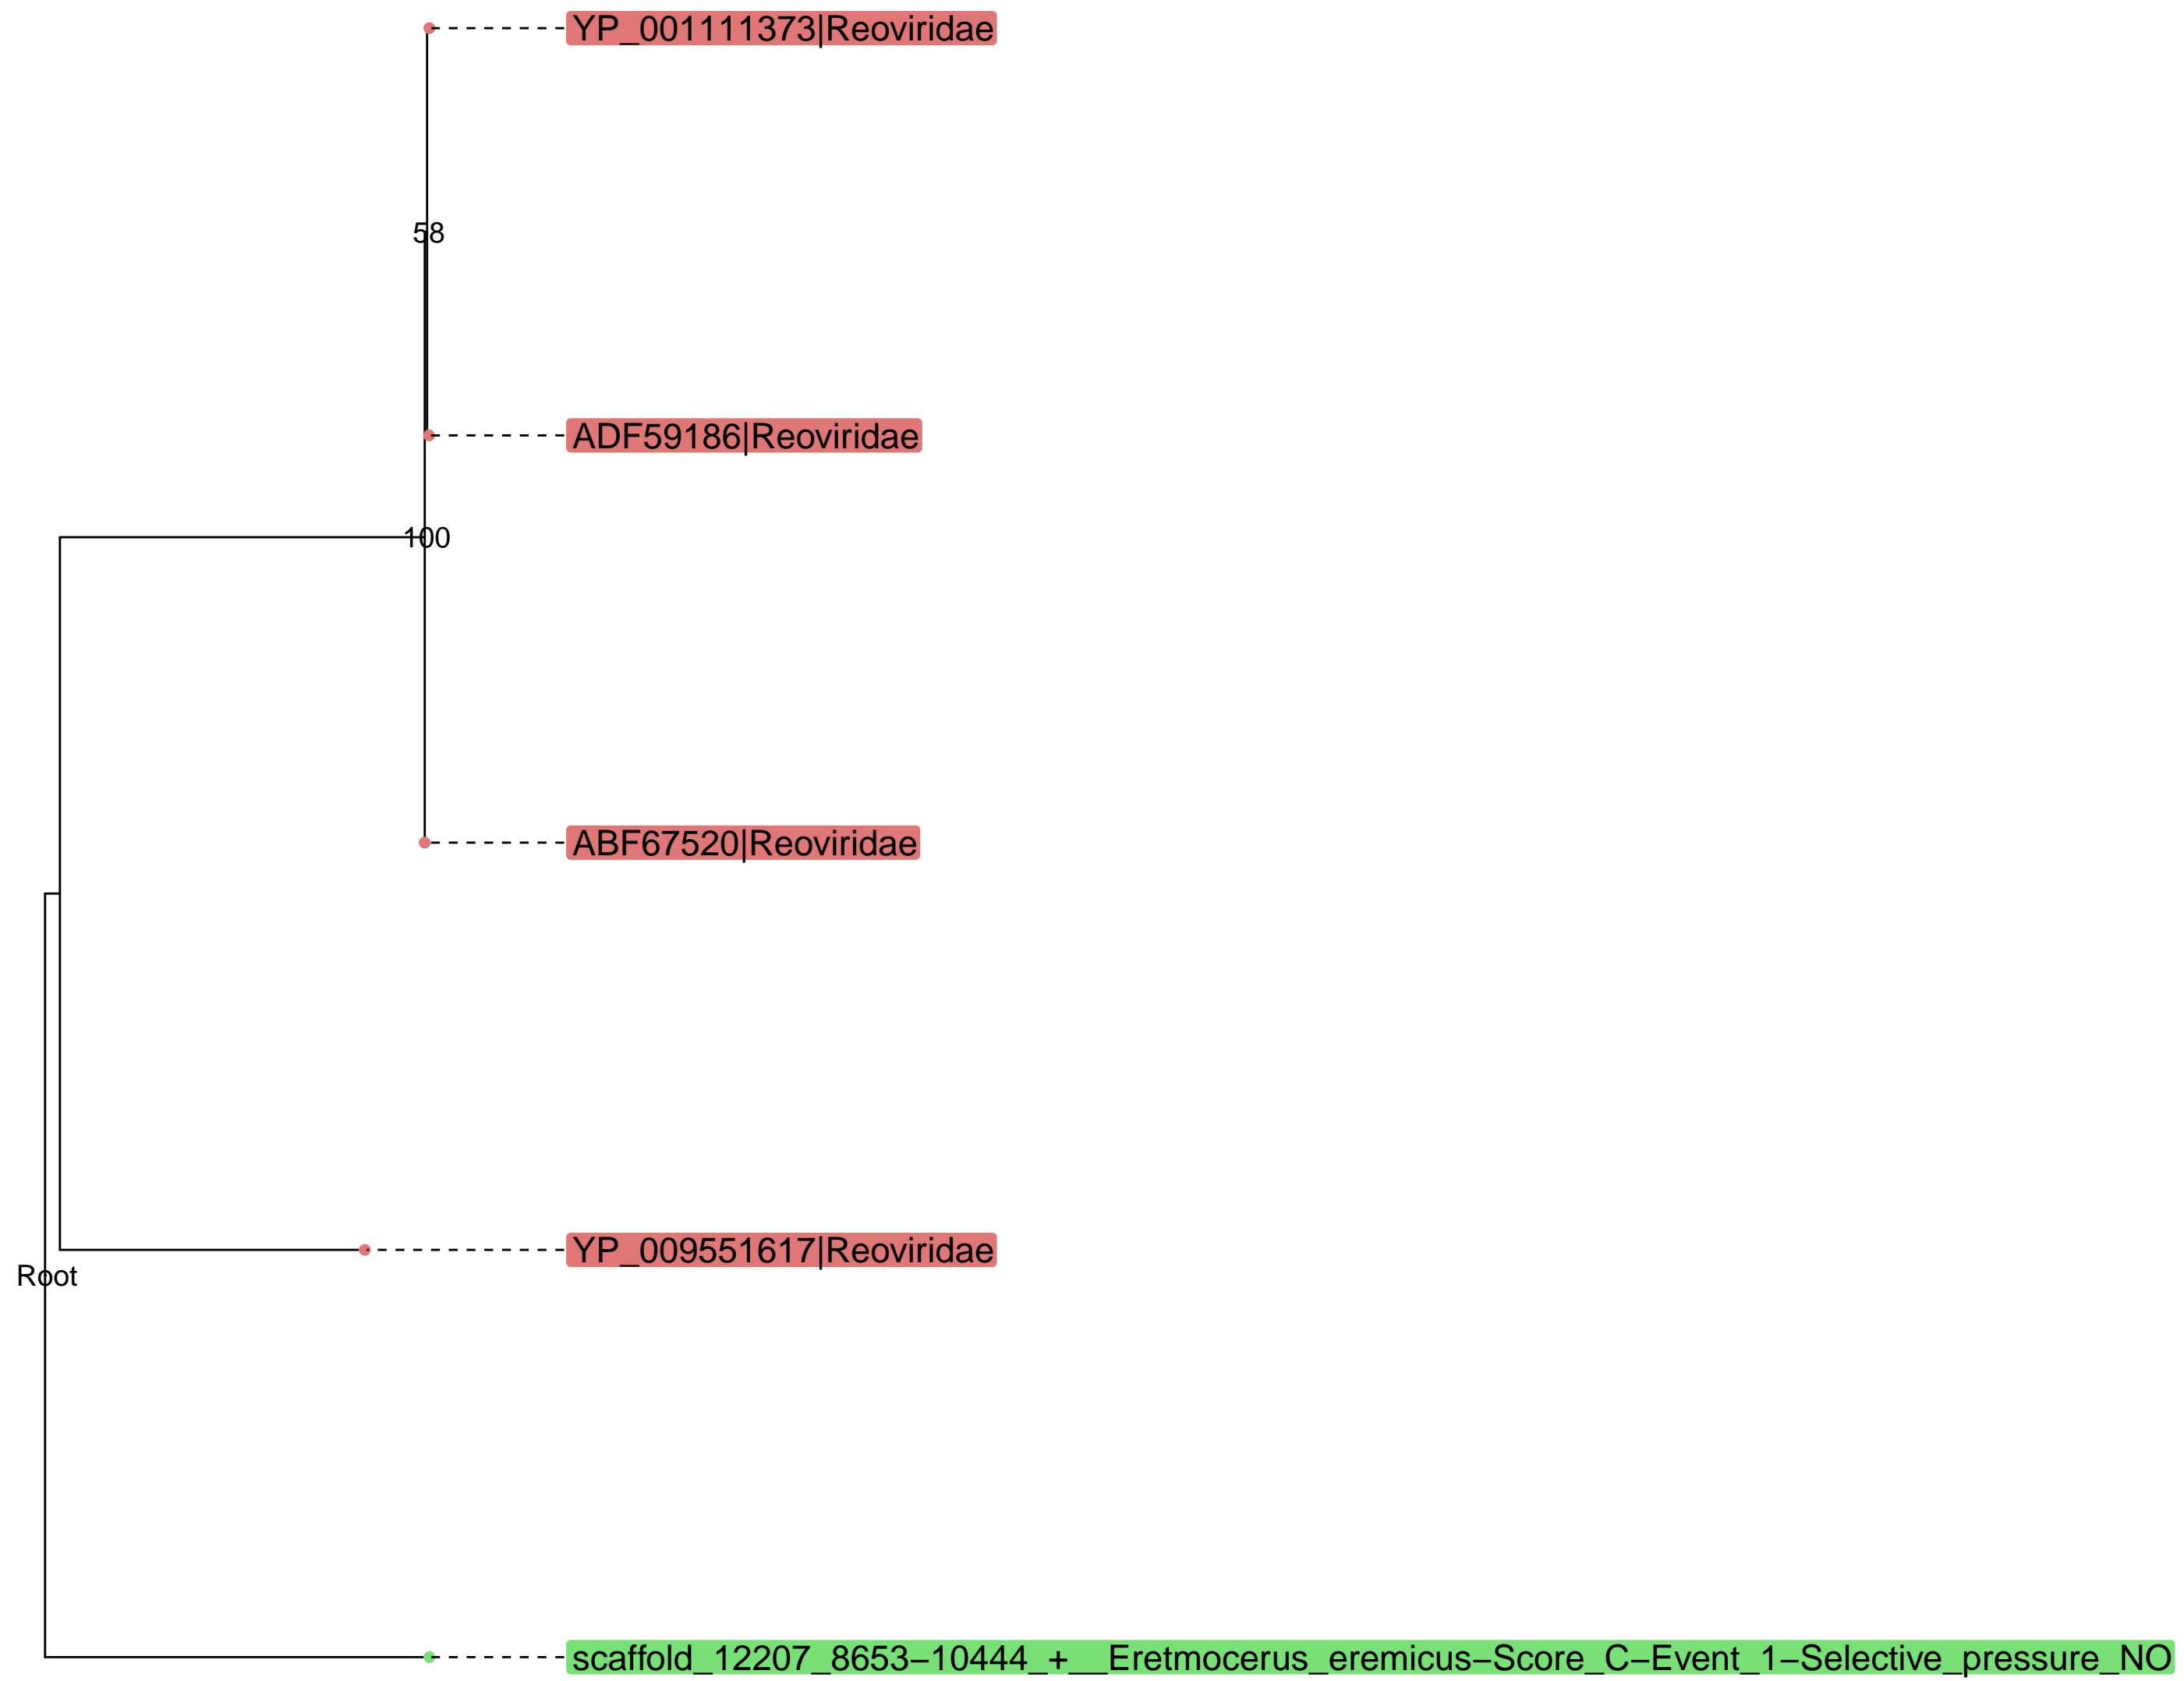

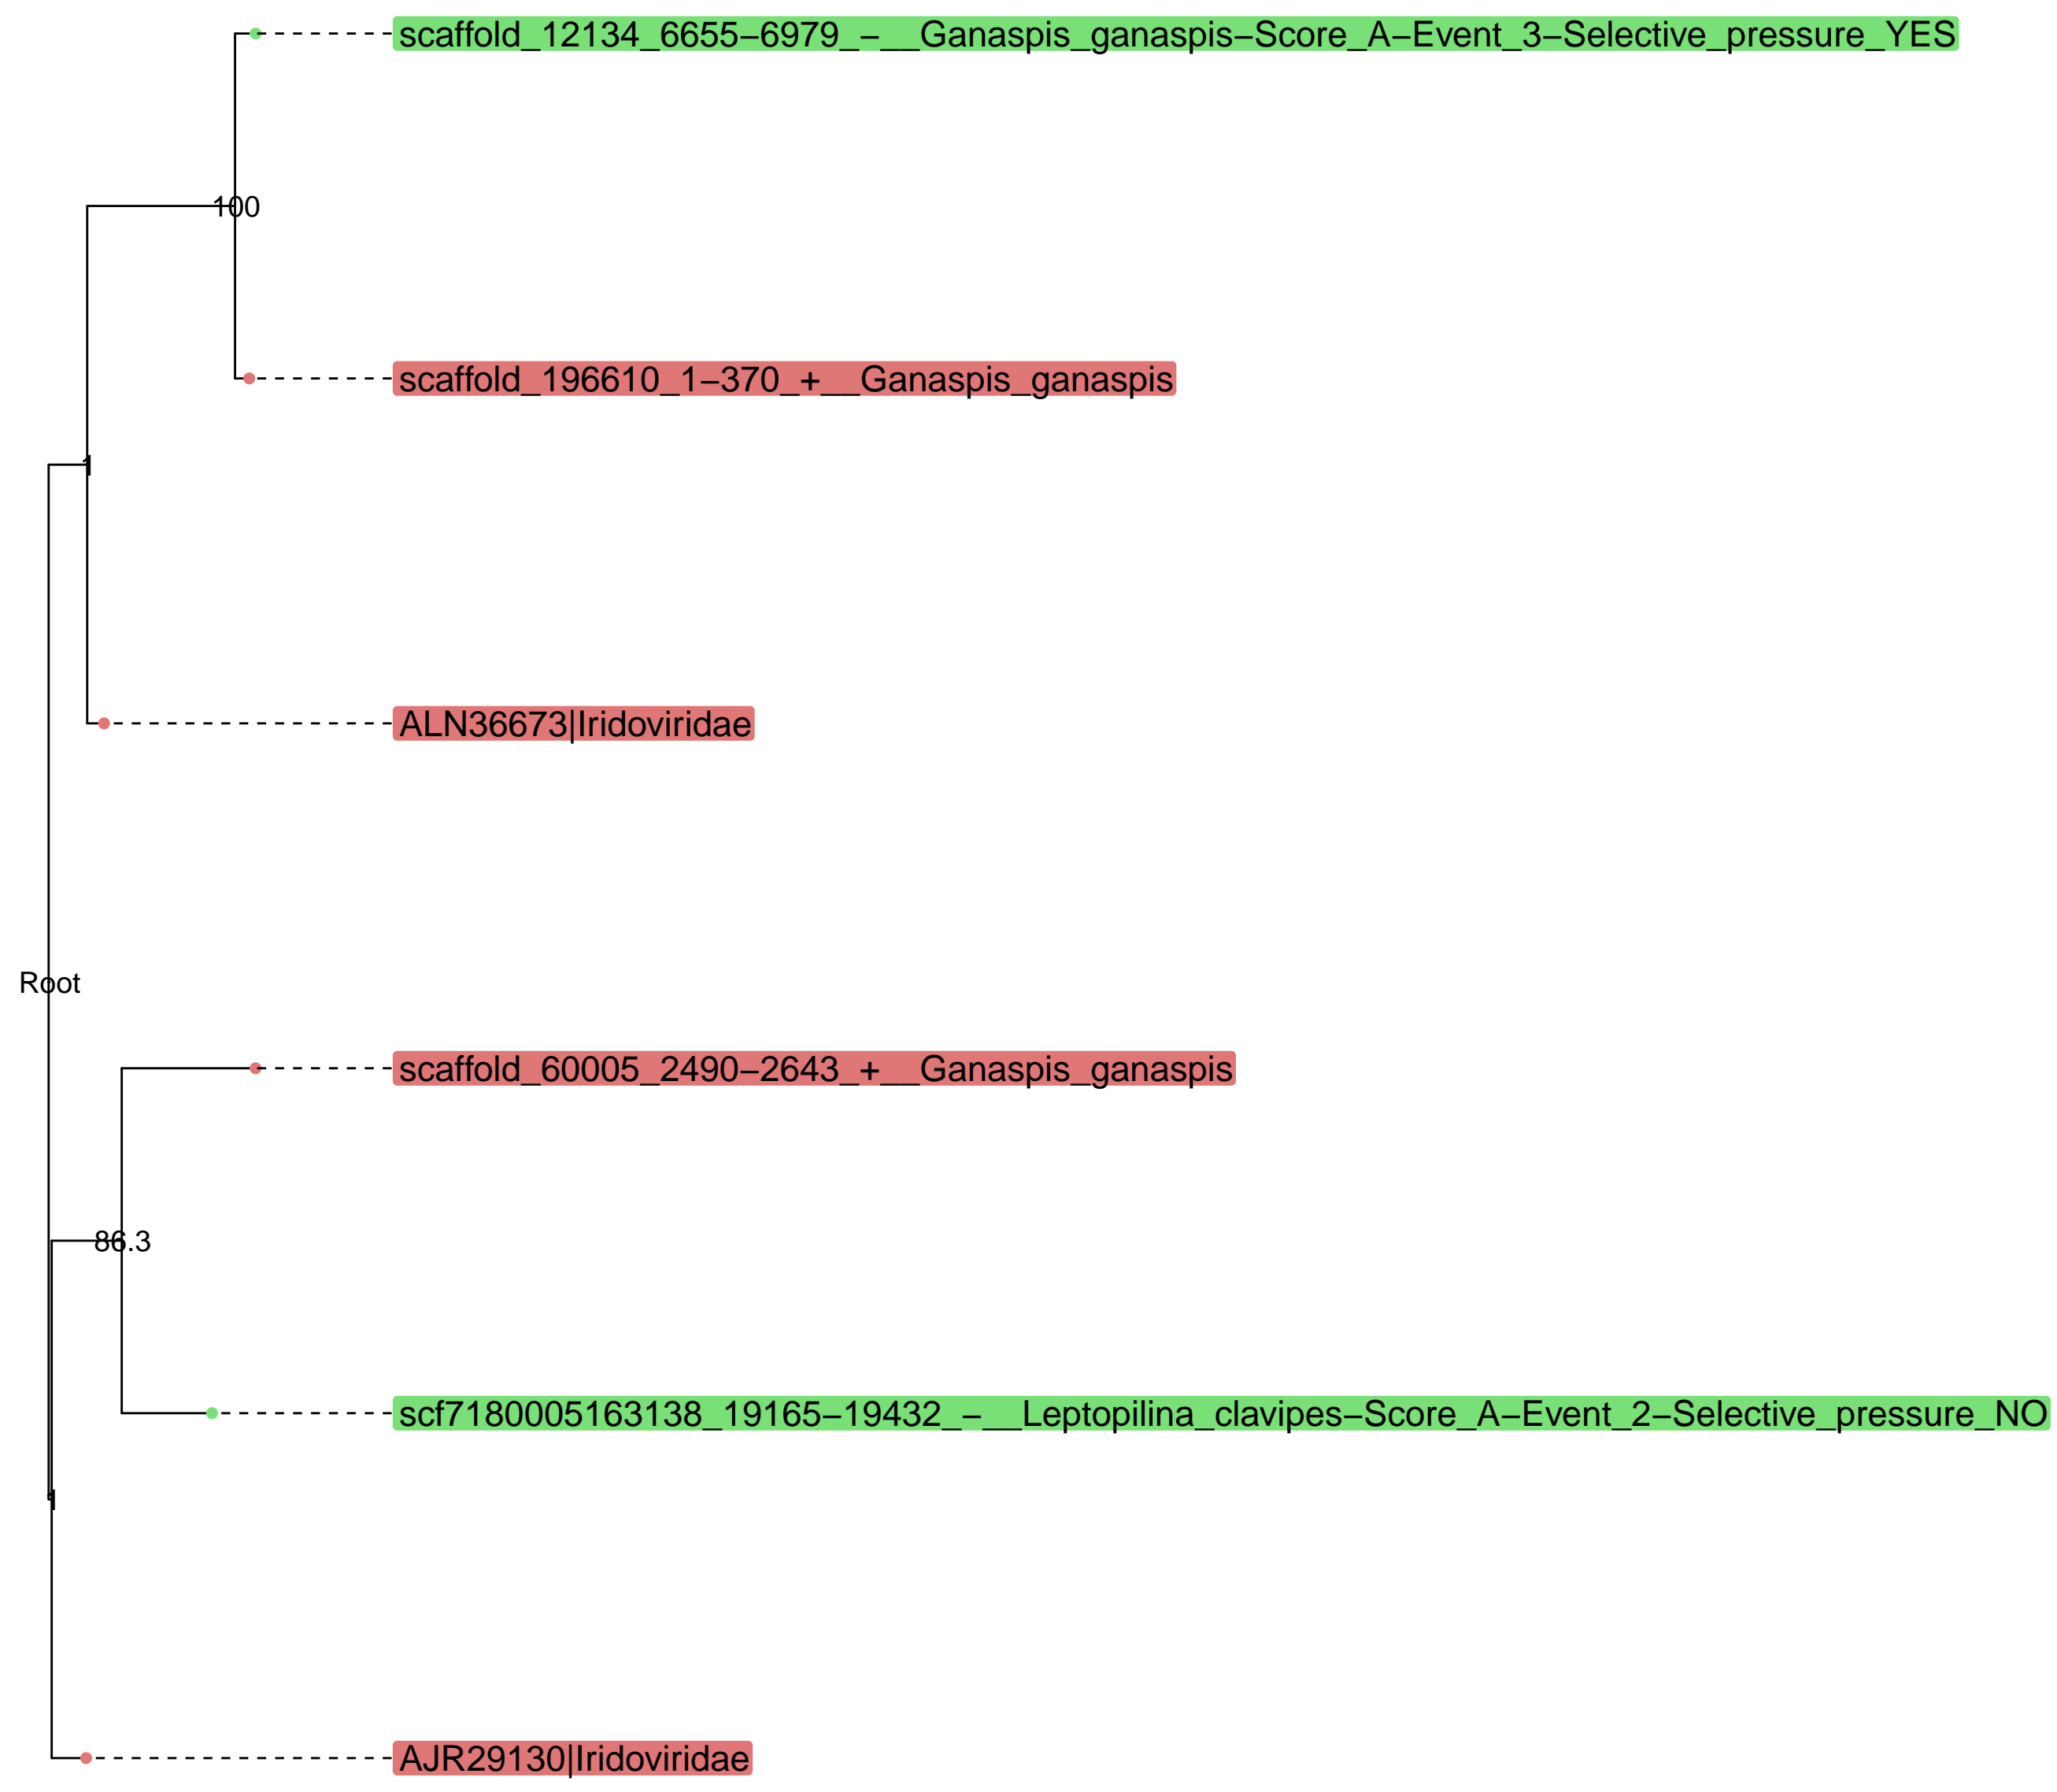

Cluster11270 – families involved : ['Iridoviridae'] – putative protein : ['Domain of unknown function (DUF1965)']

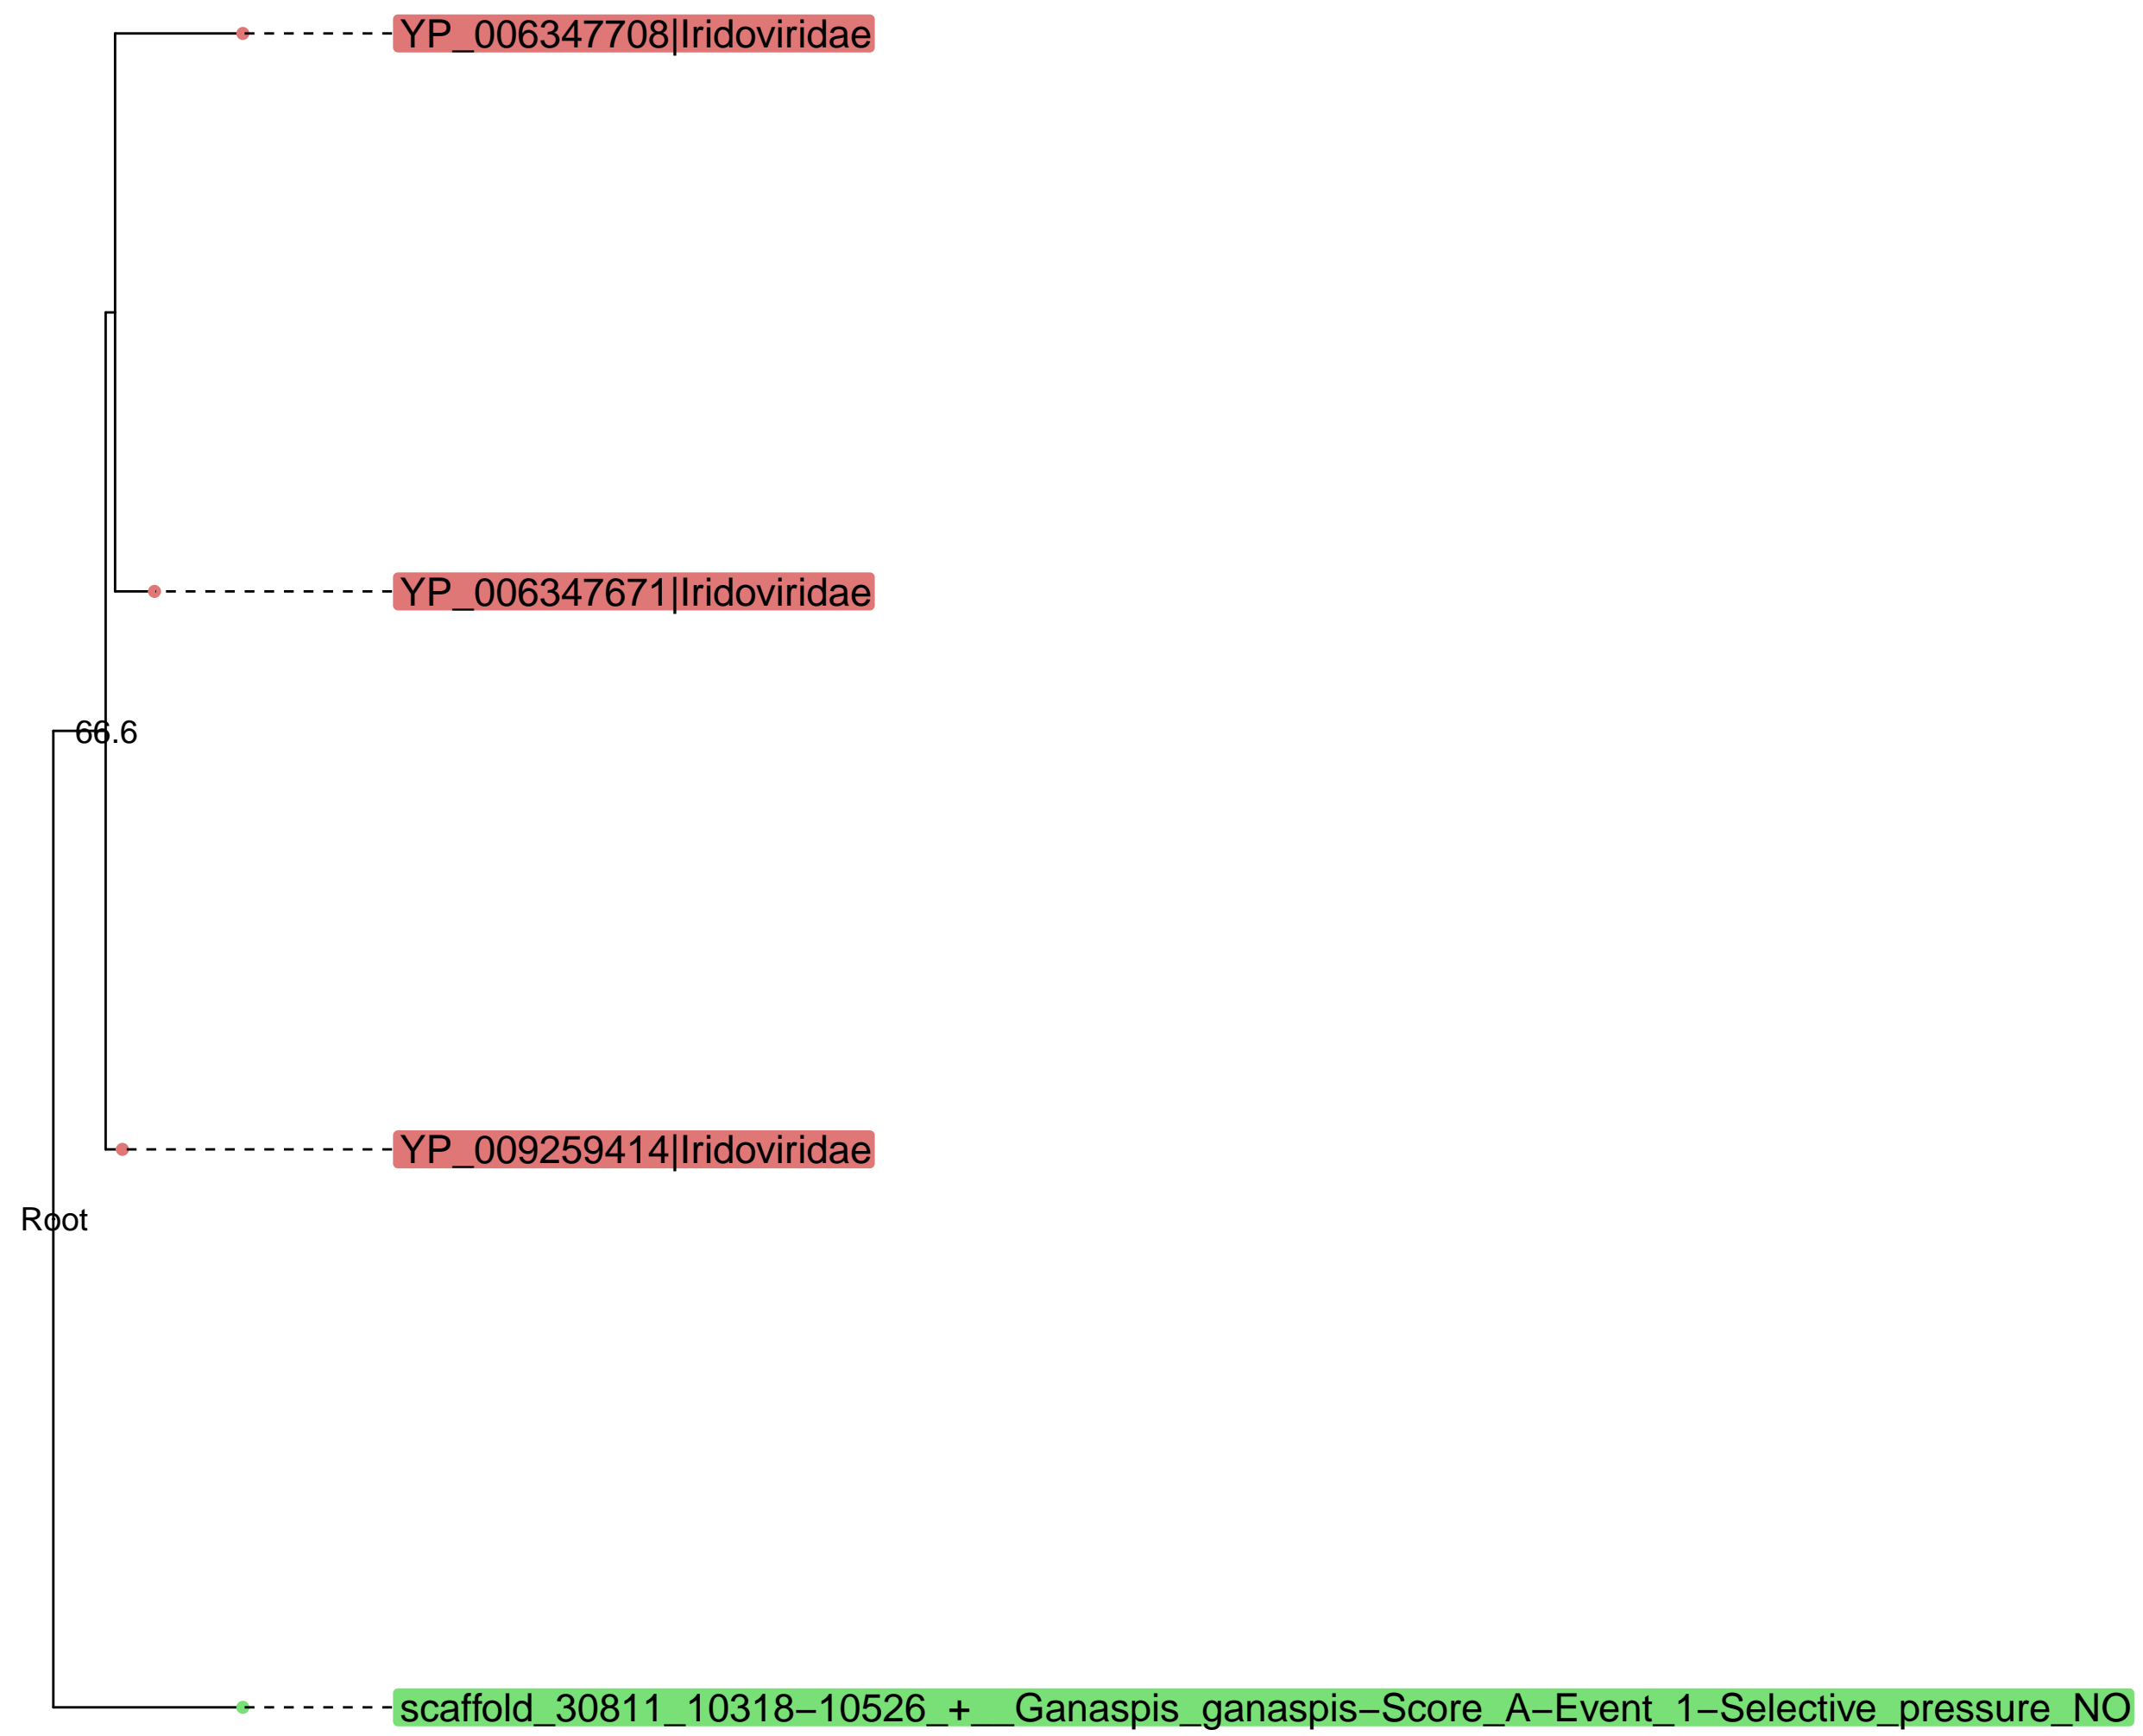

Cluster11161 – families involved : ['Iridoviridae', 'Phycodnaviridae'] – putative protein : ['YLP motif']

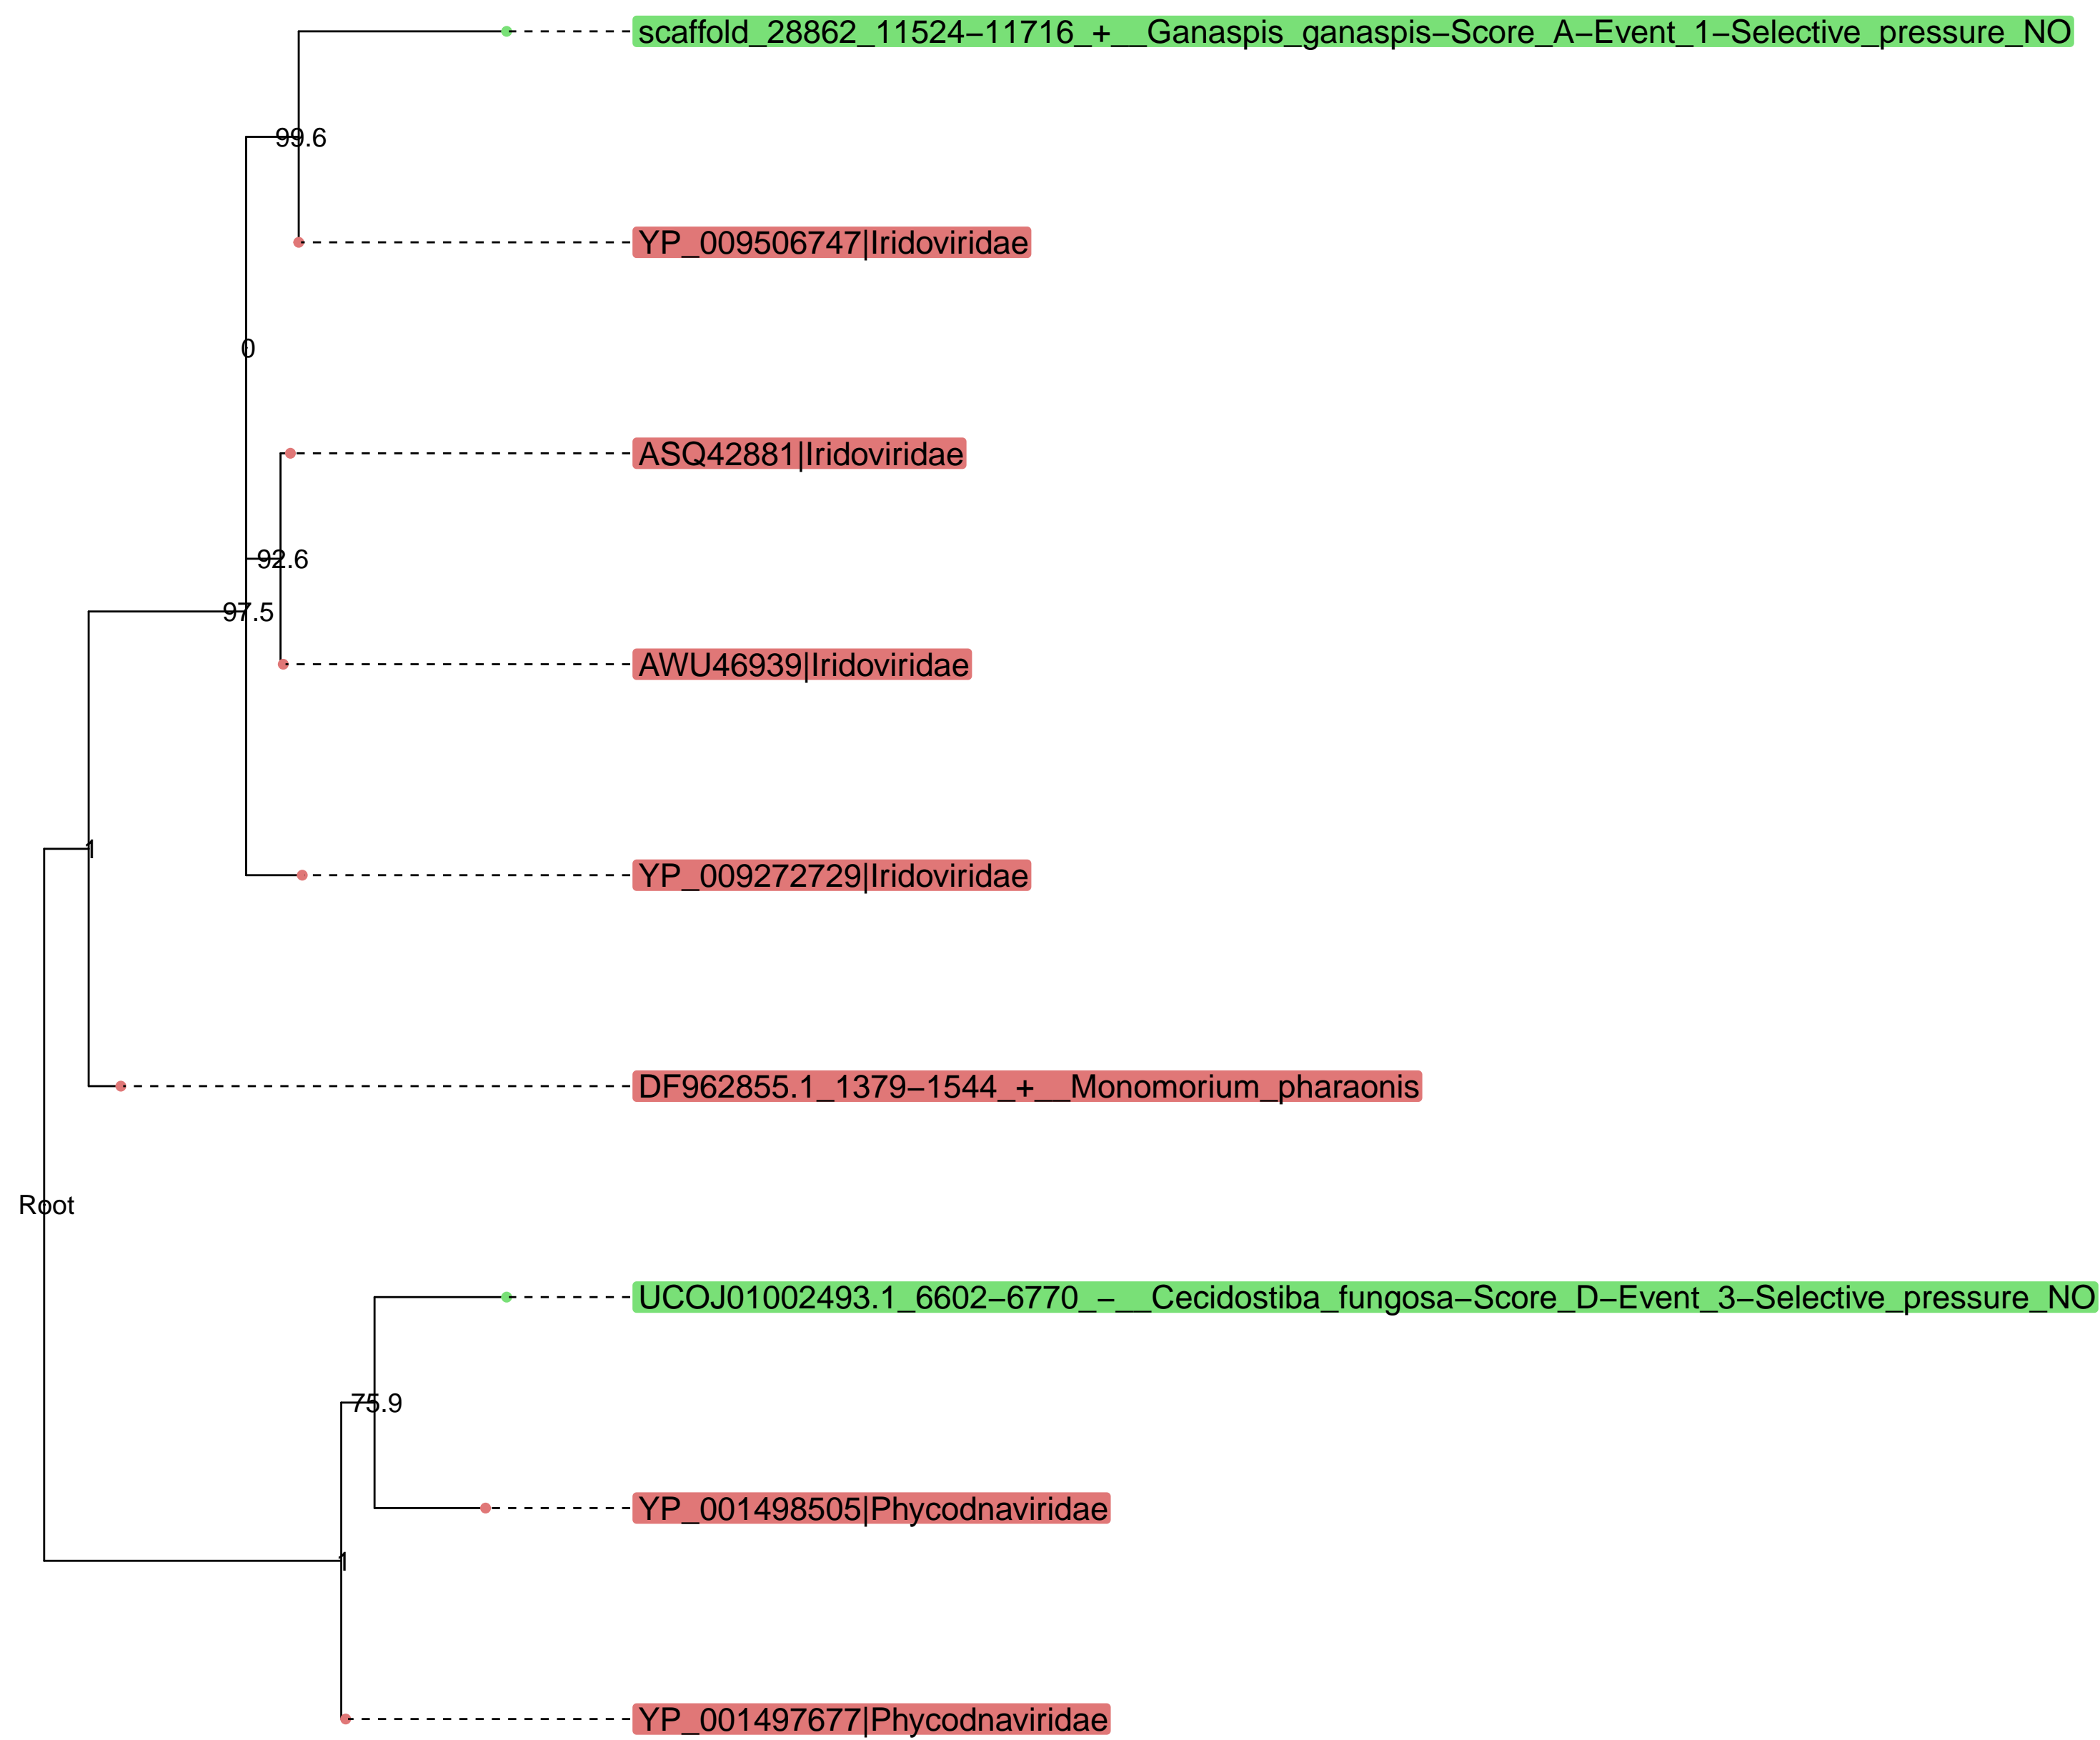

Cluster8206 – families involved : ['Nudiviridae'] – putative protein : ['ACH96209.1 GrBNV gp59-like protein']

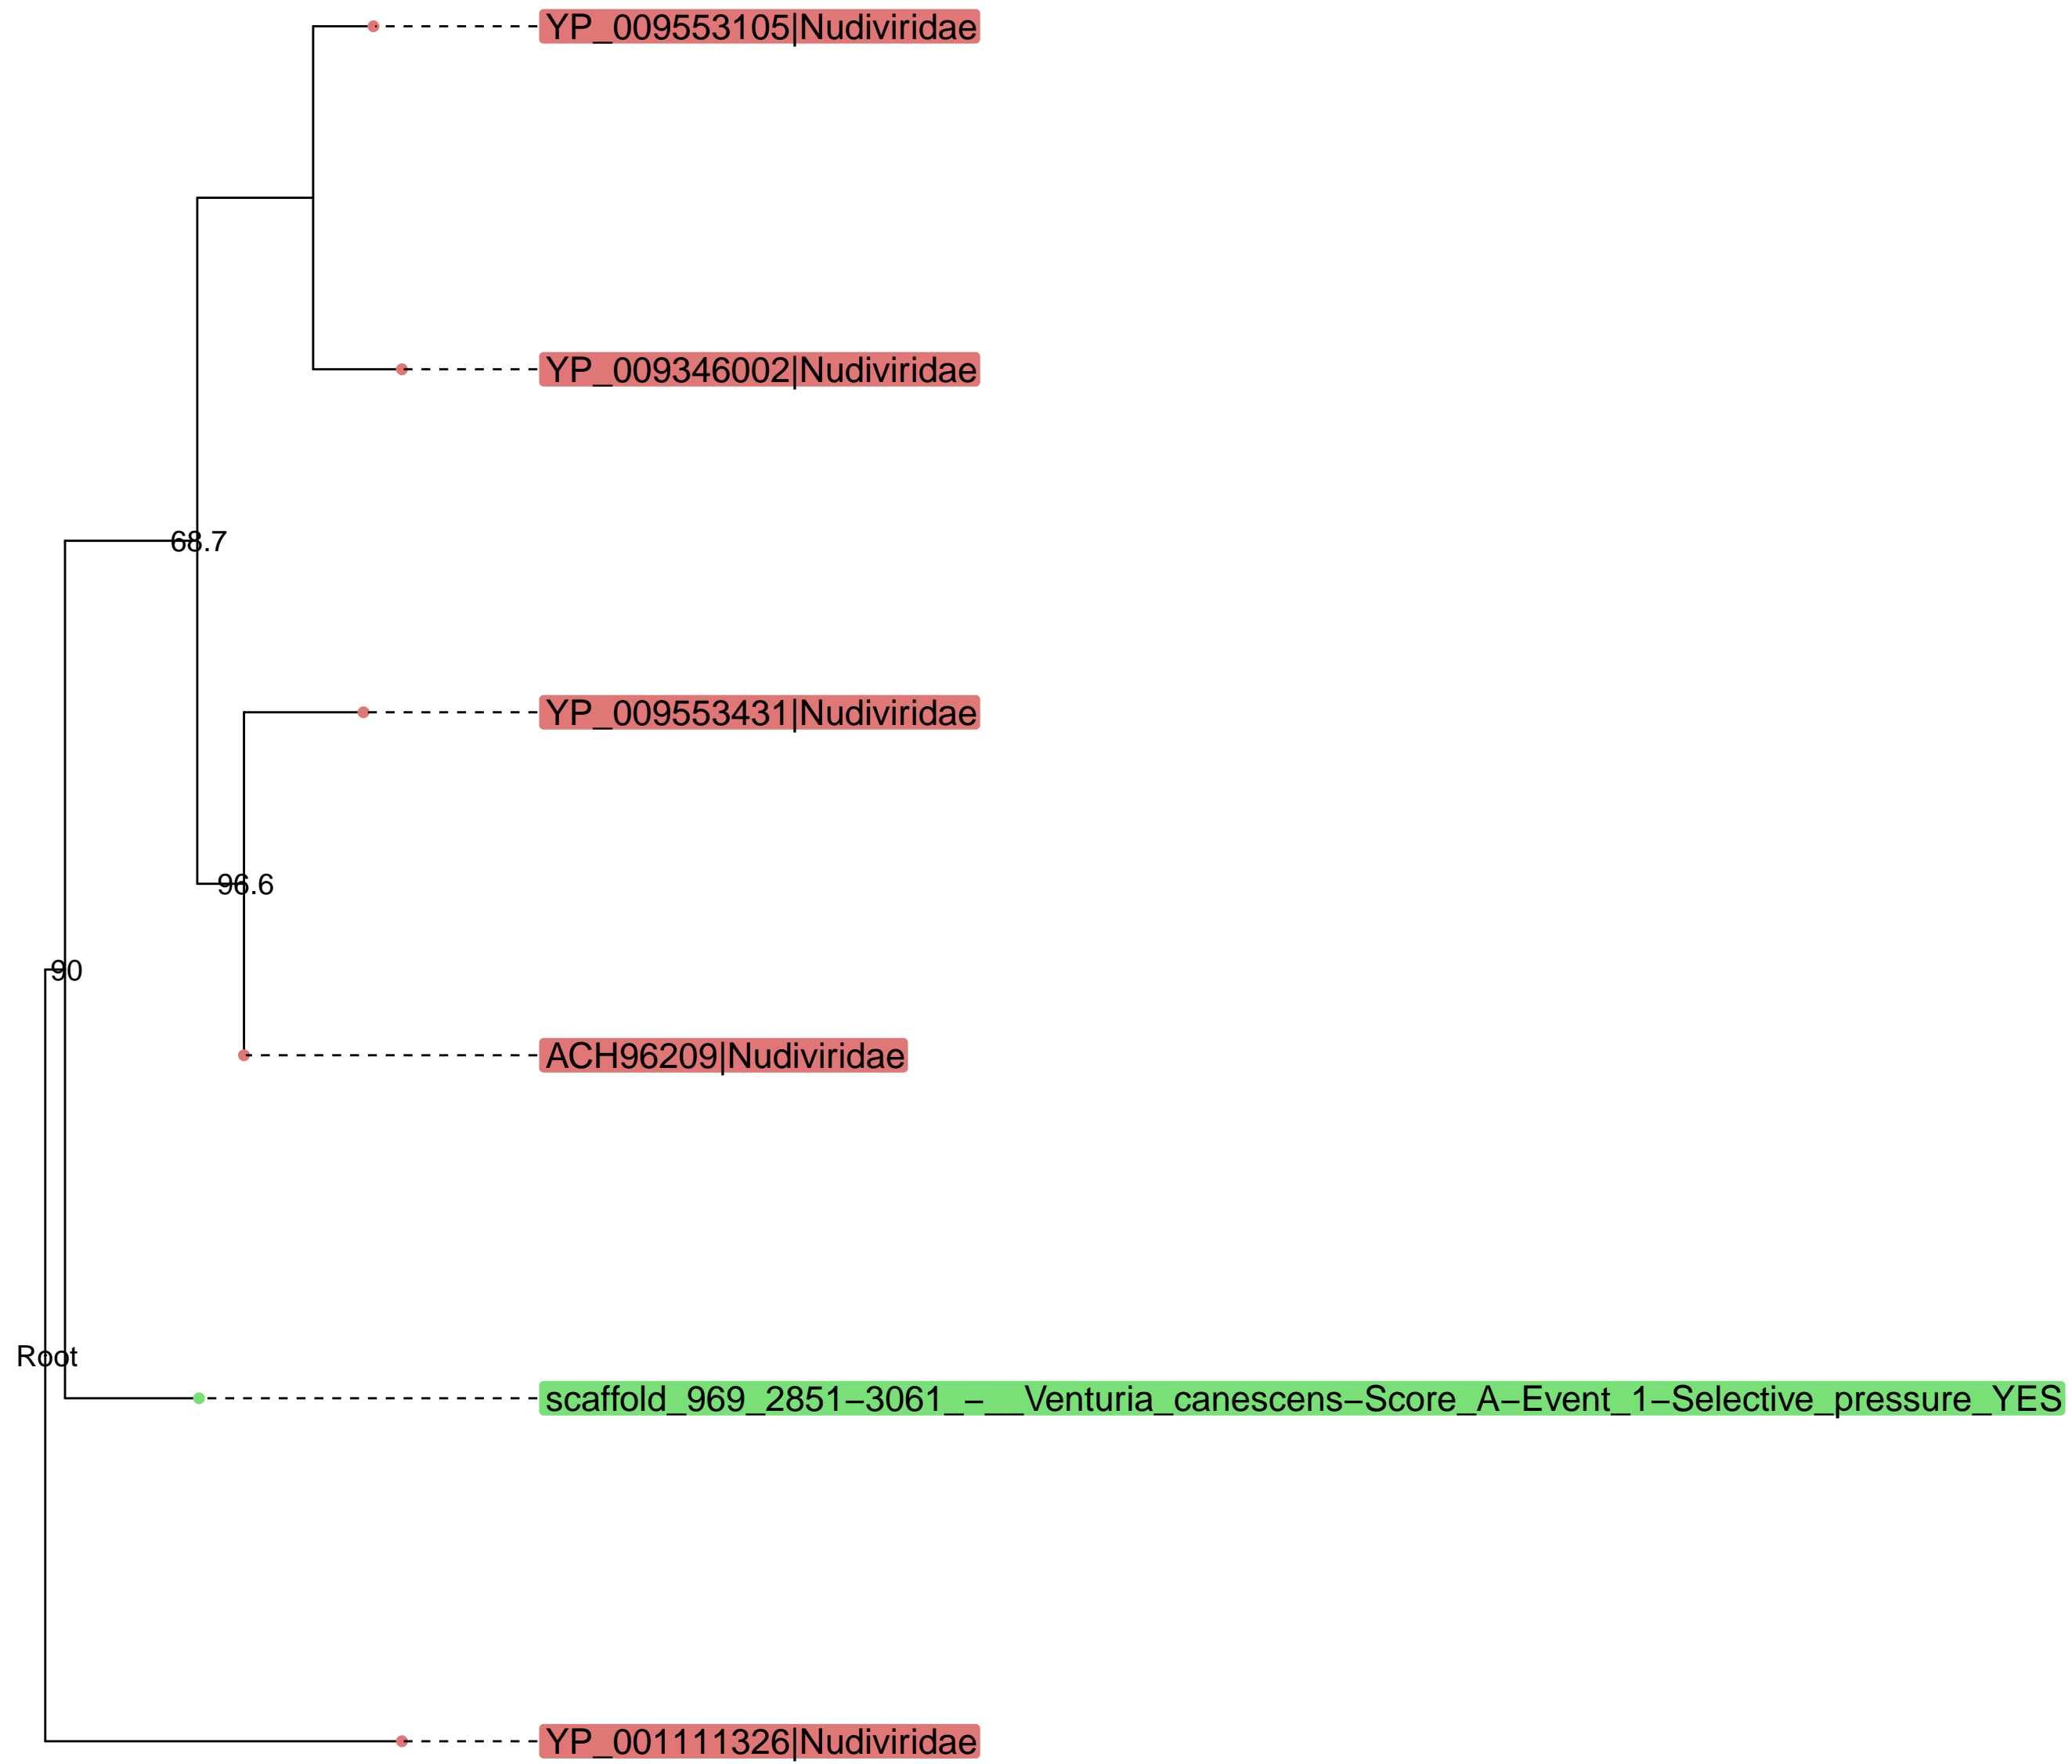



Cluster27243 – families involved : ['Nudiviridae'] – putative protein : ['ACH96171.1 GrBNV gp95-like protein (Putative gp95-like protein)']

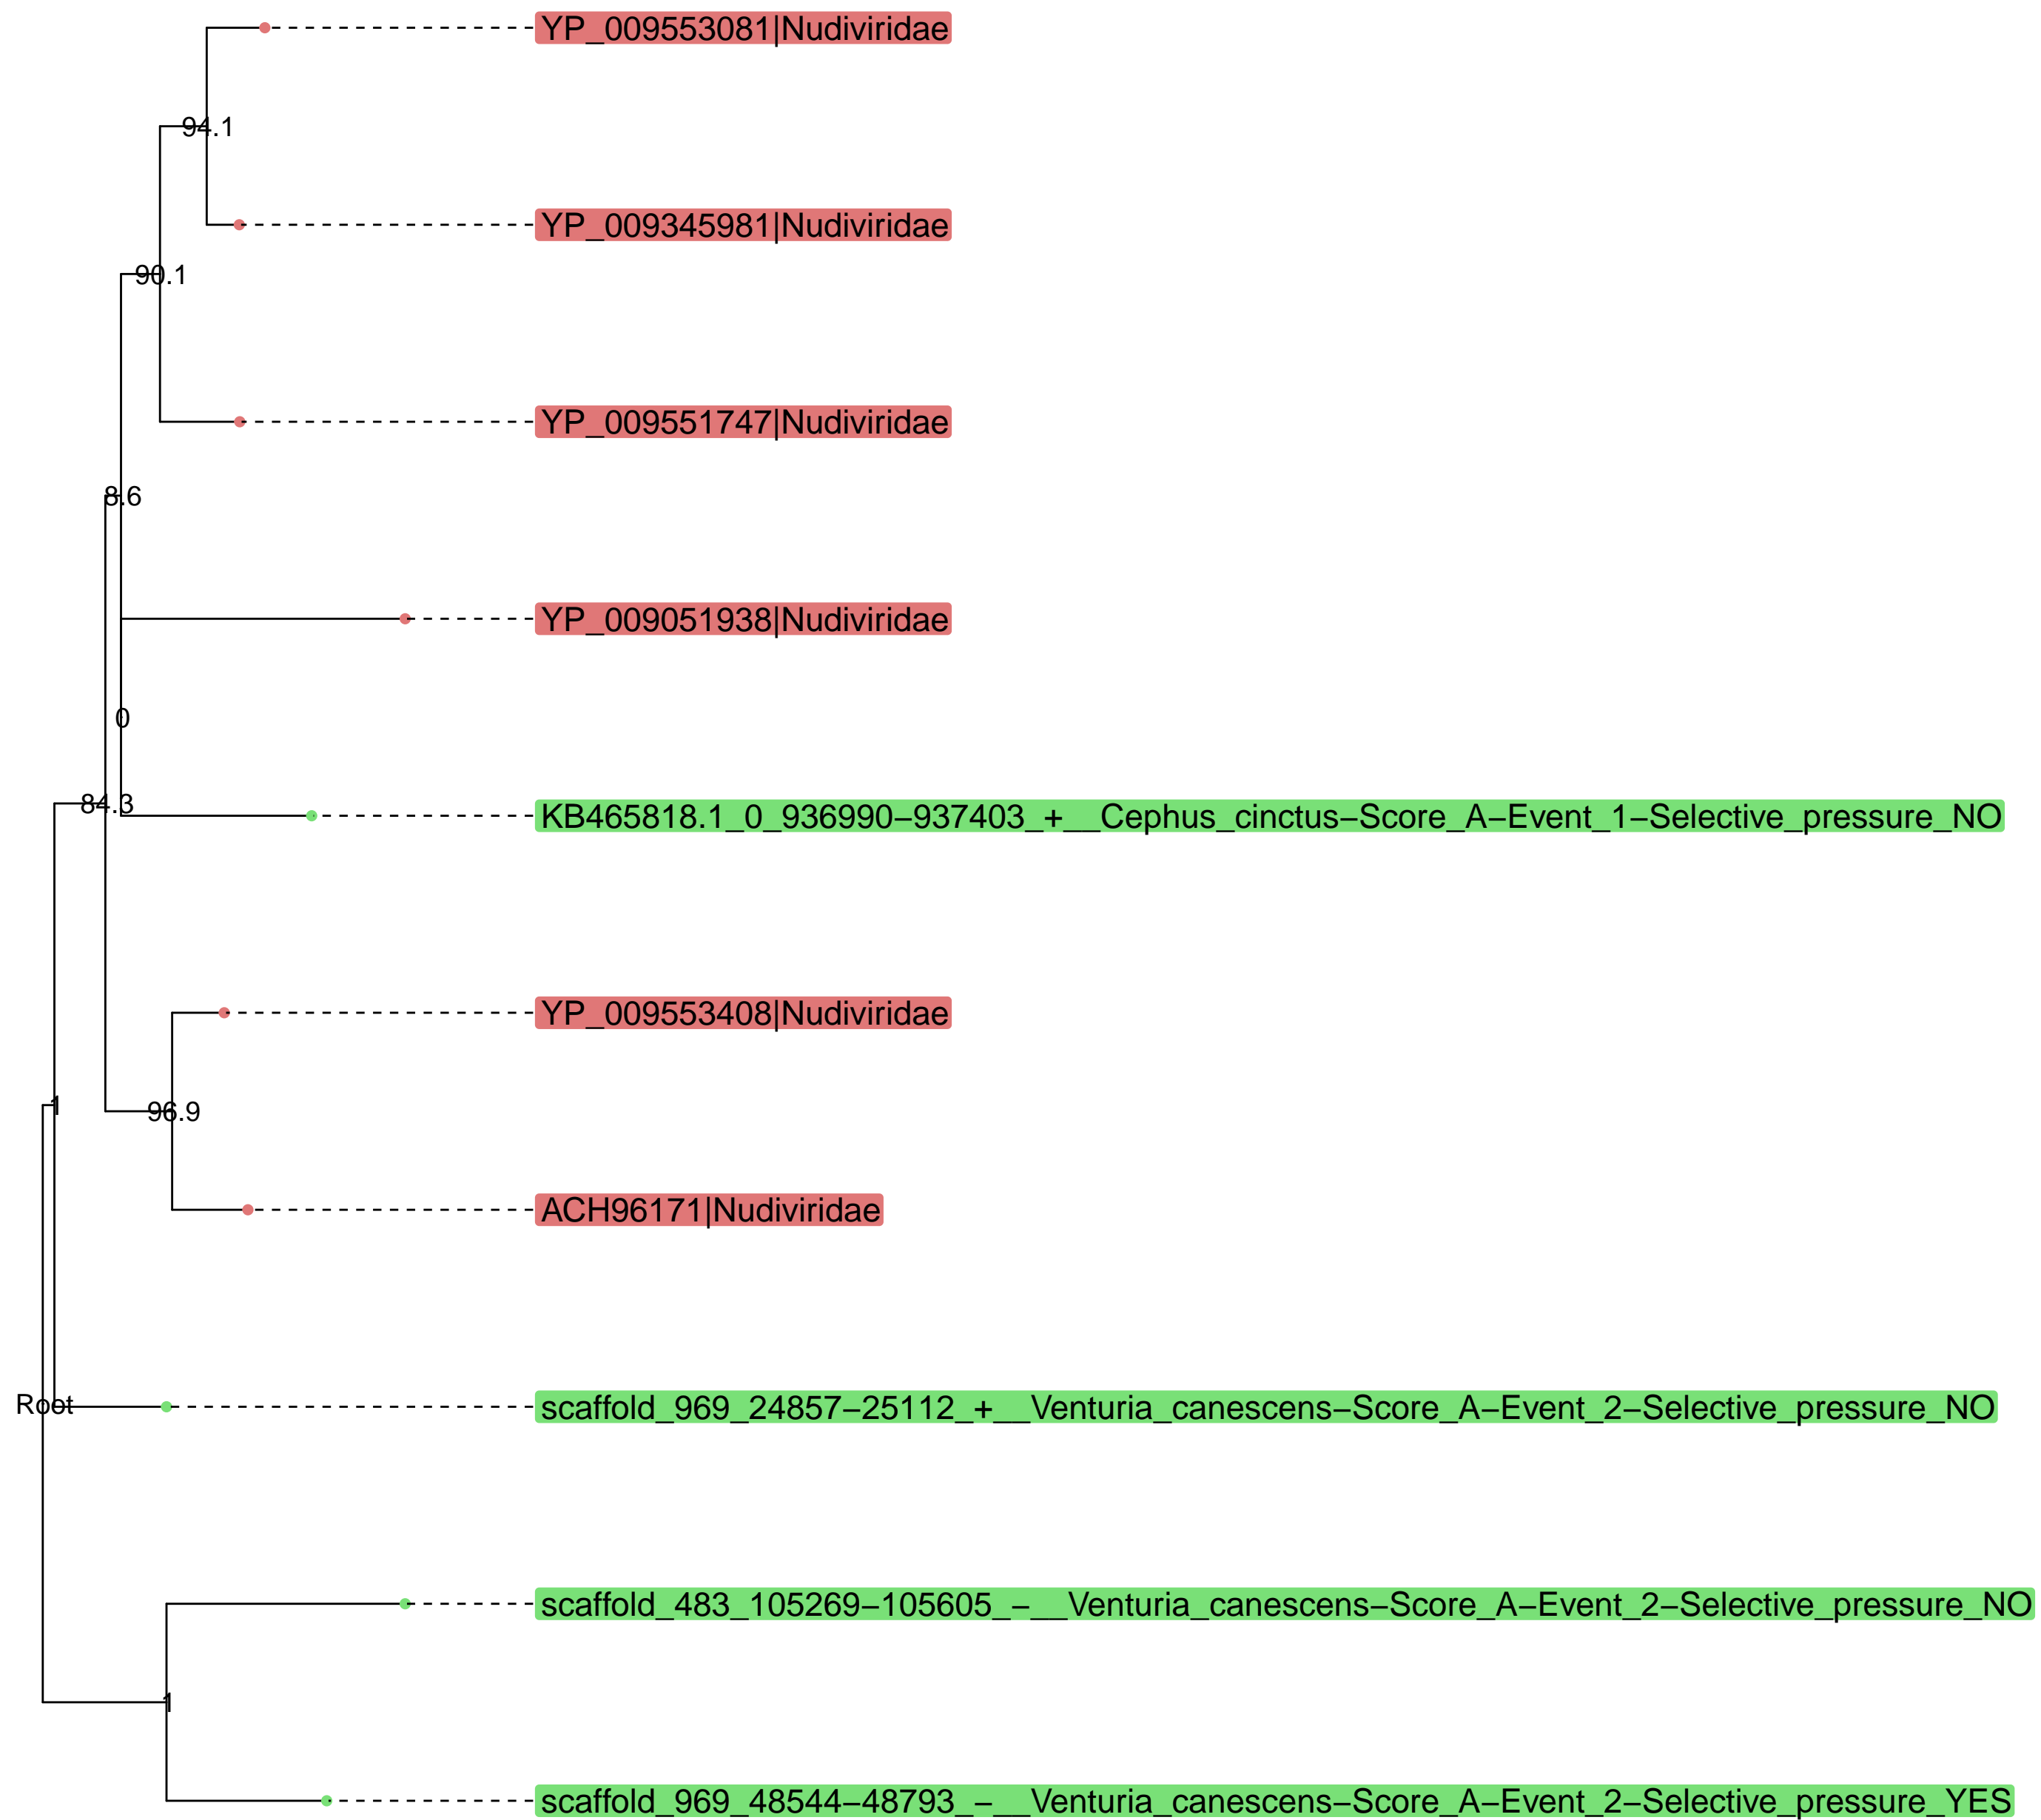

Cluster21249 – families involved : ['Nudiviridae'] – putative protein : ['ACH96176.1 GrBNV gp22 and 23-like protein']

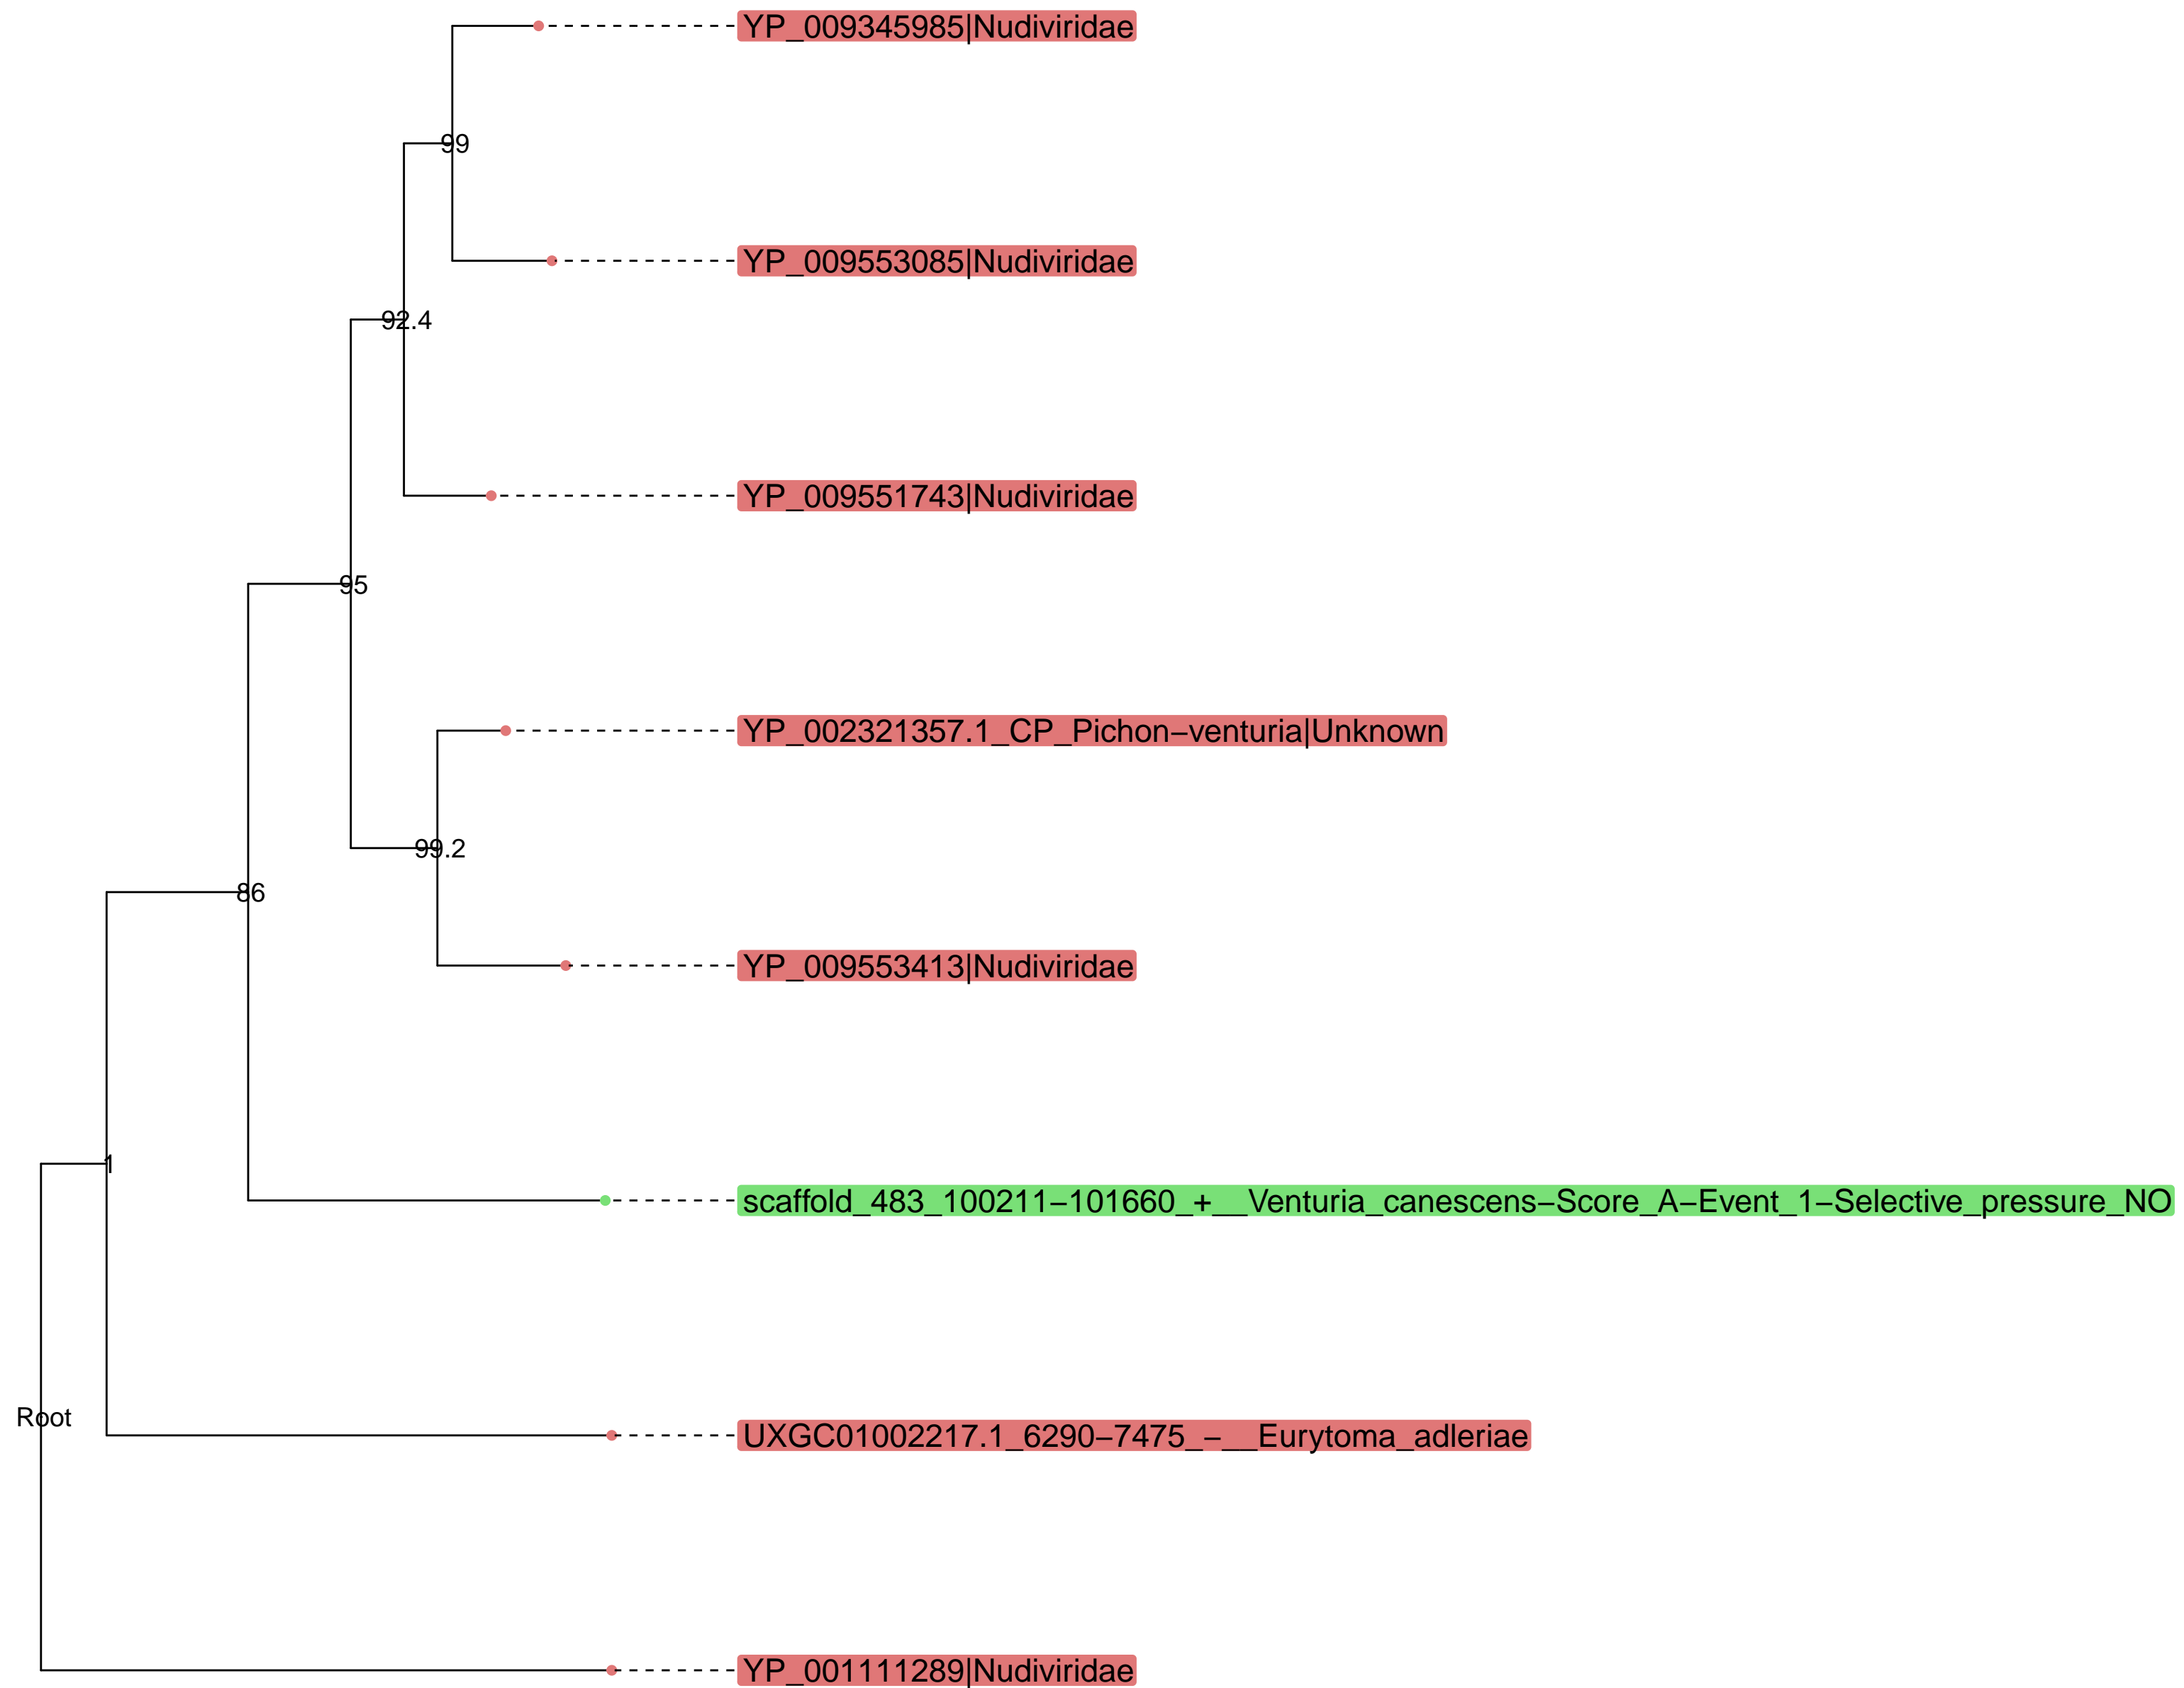

Cluster18176 – families involved : ['Nudiviridae'] – putative protein : ['GrBNV\_gp83-like protein']

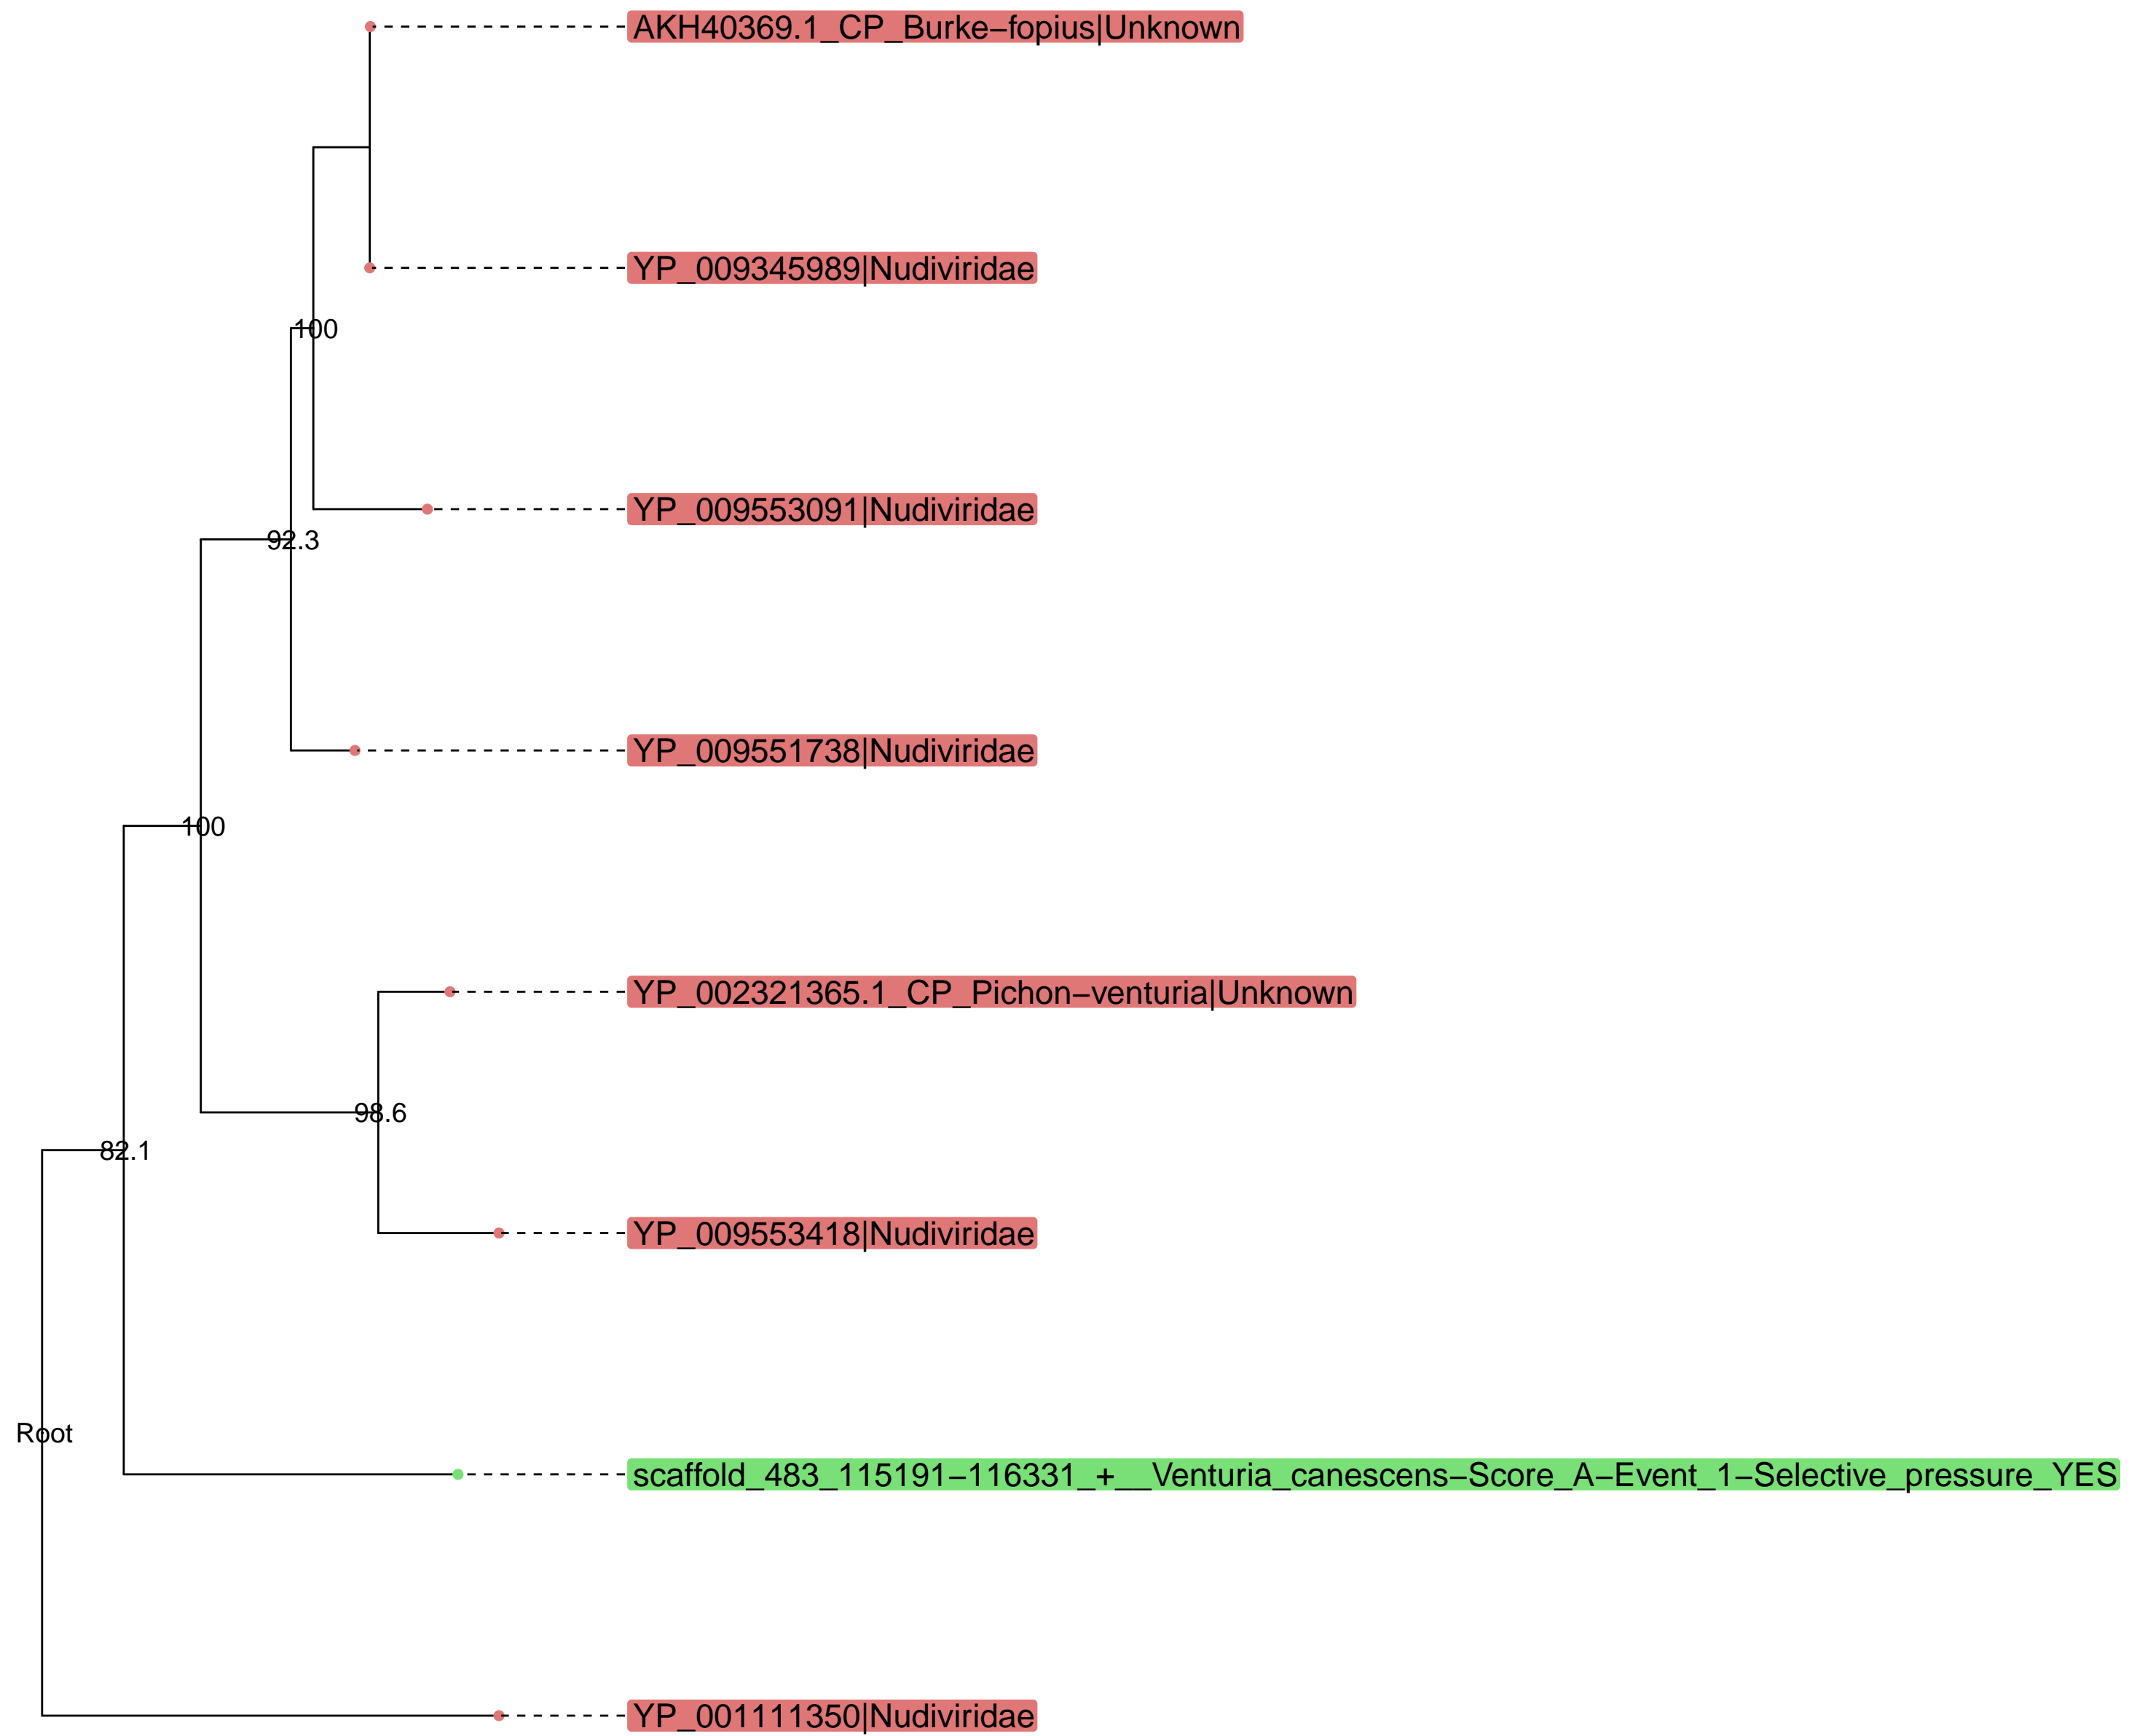

Cluster14604 – families involved : ['Nudiviridae'] – putative protein : ['Putative guanylate kinase']

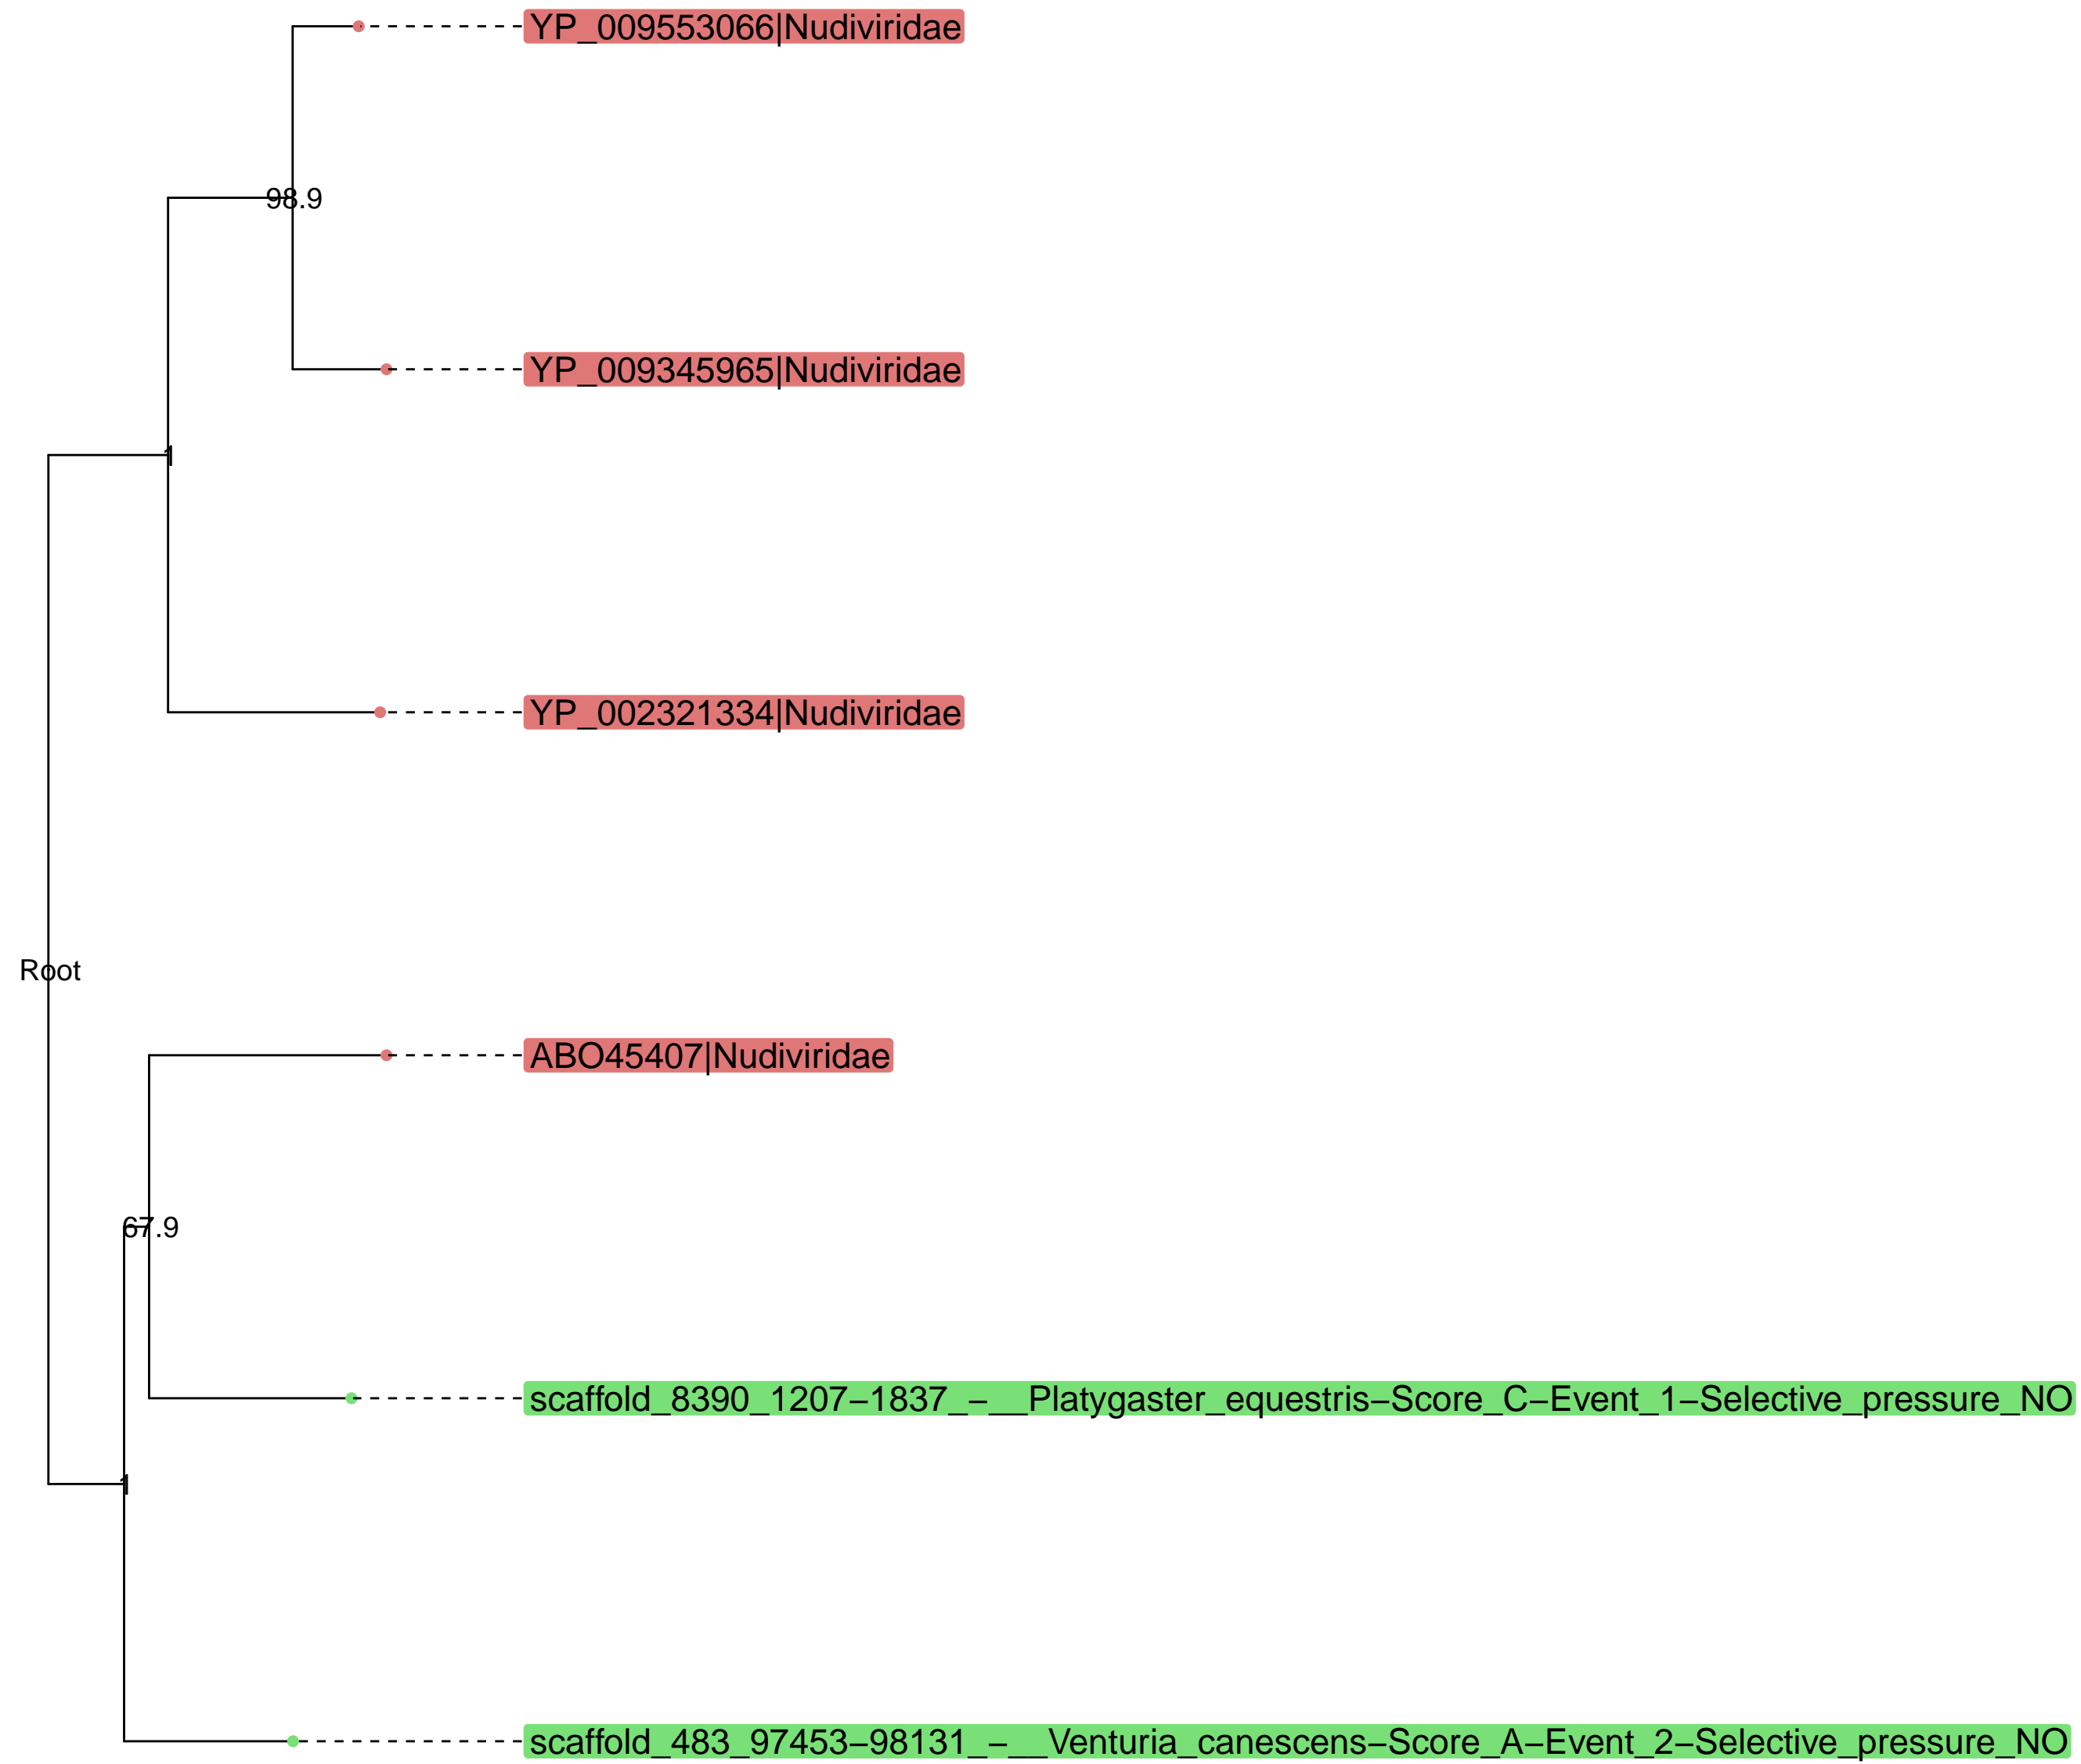

Cluster13641 – families involved : ['Nudiviridae'] – putative protein : ['Uncharacterized protein']

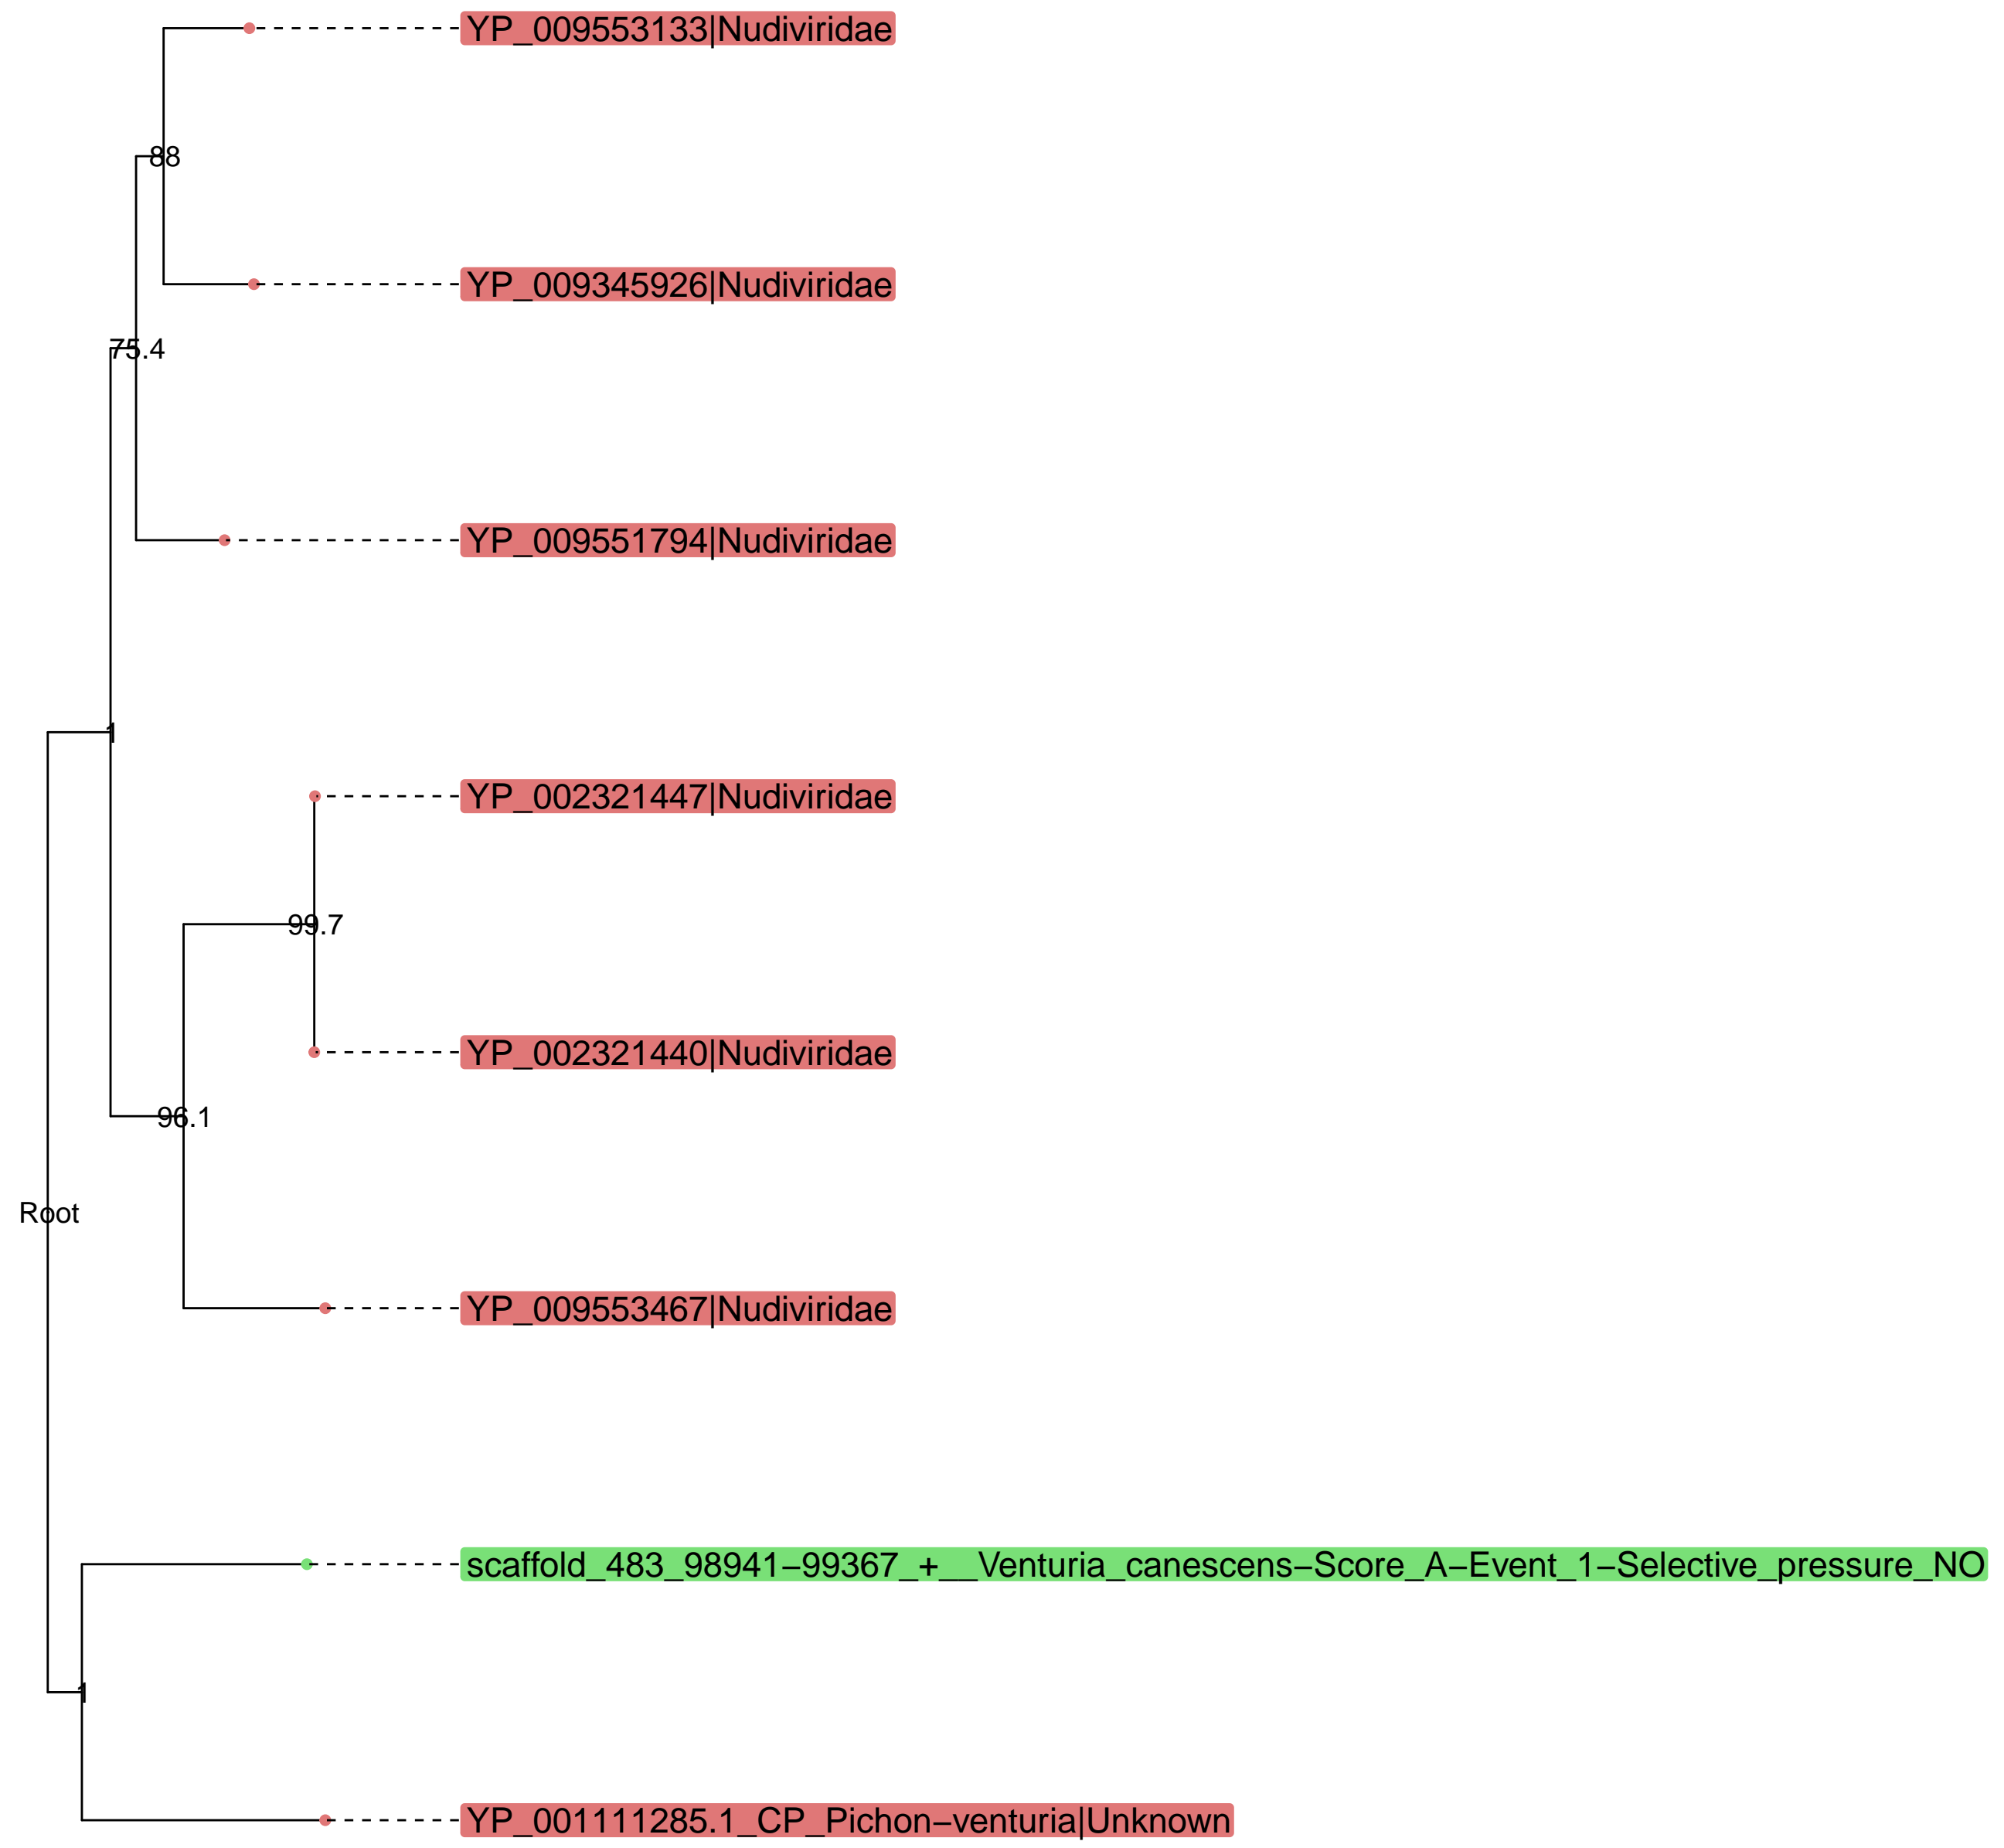

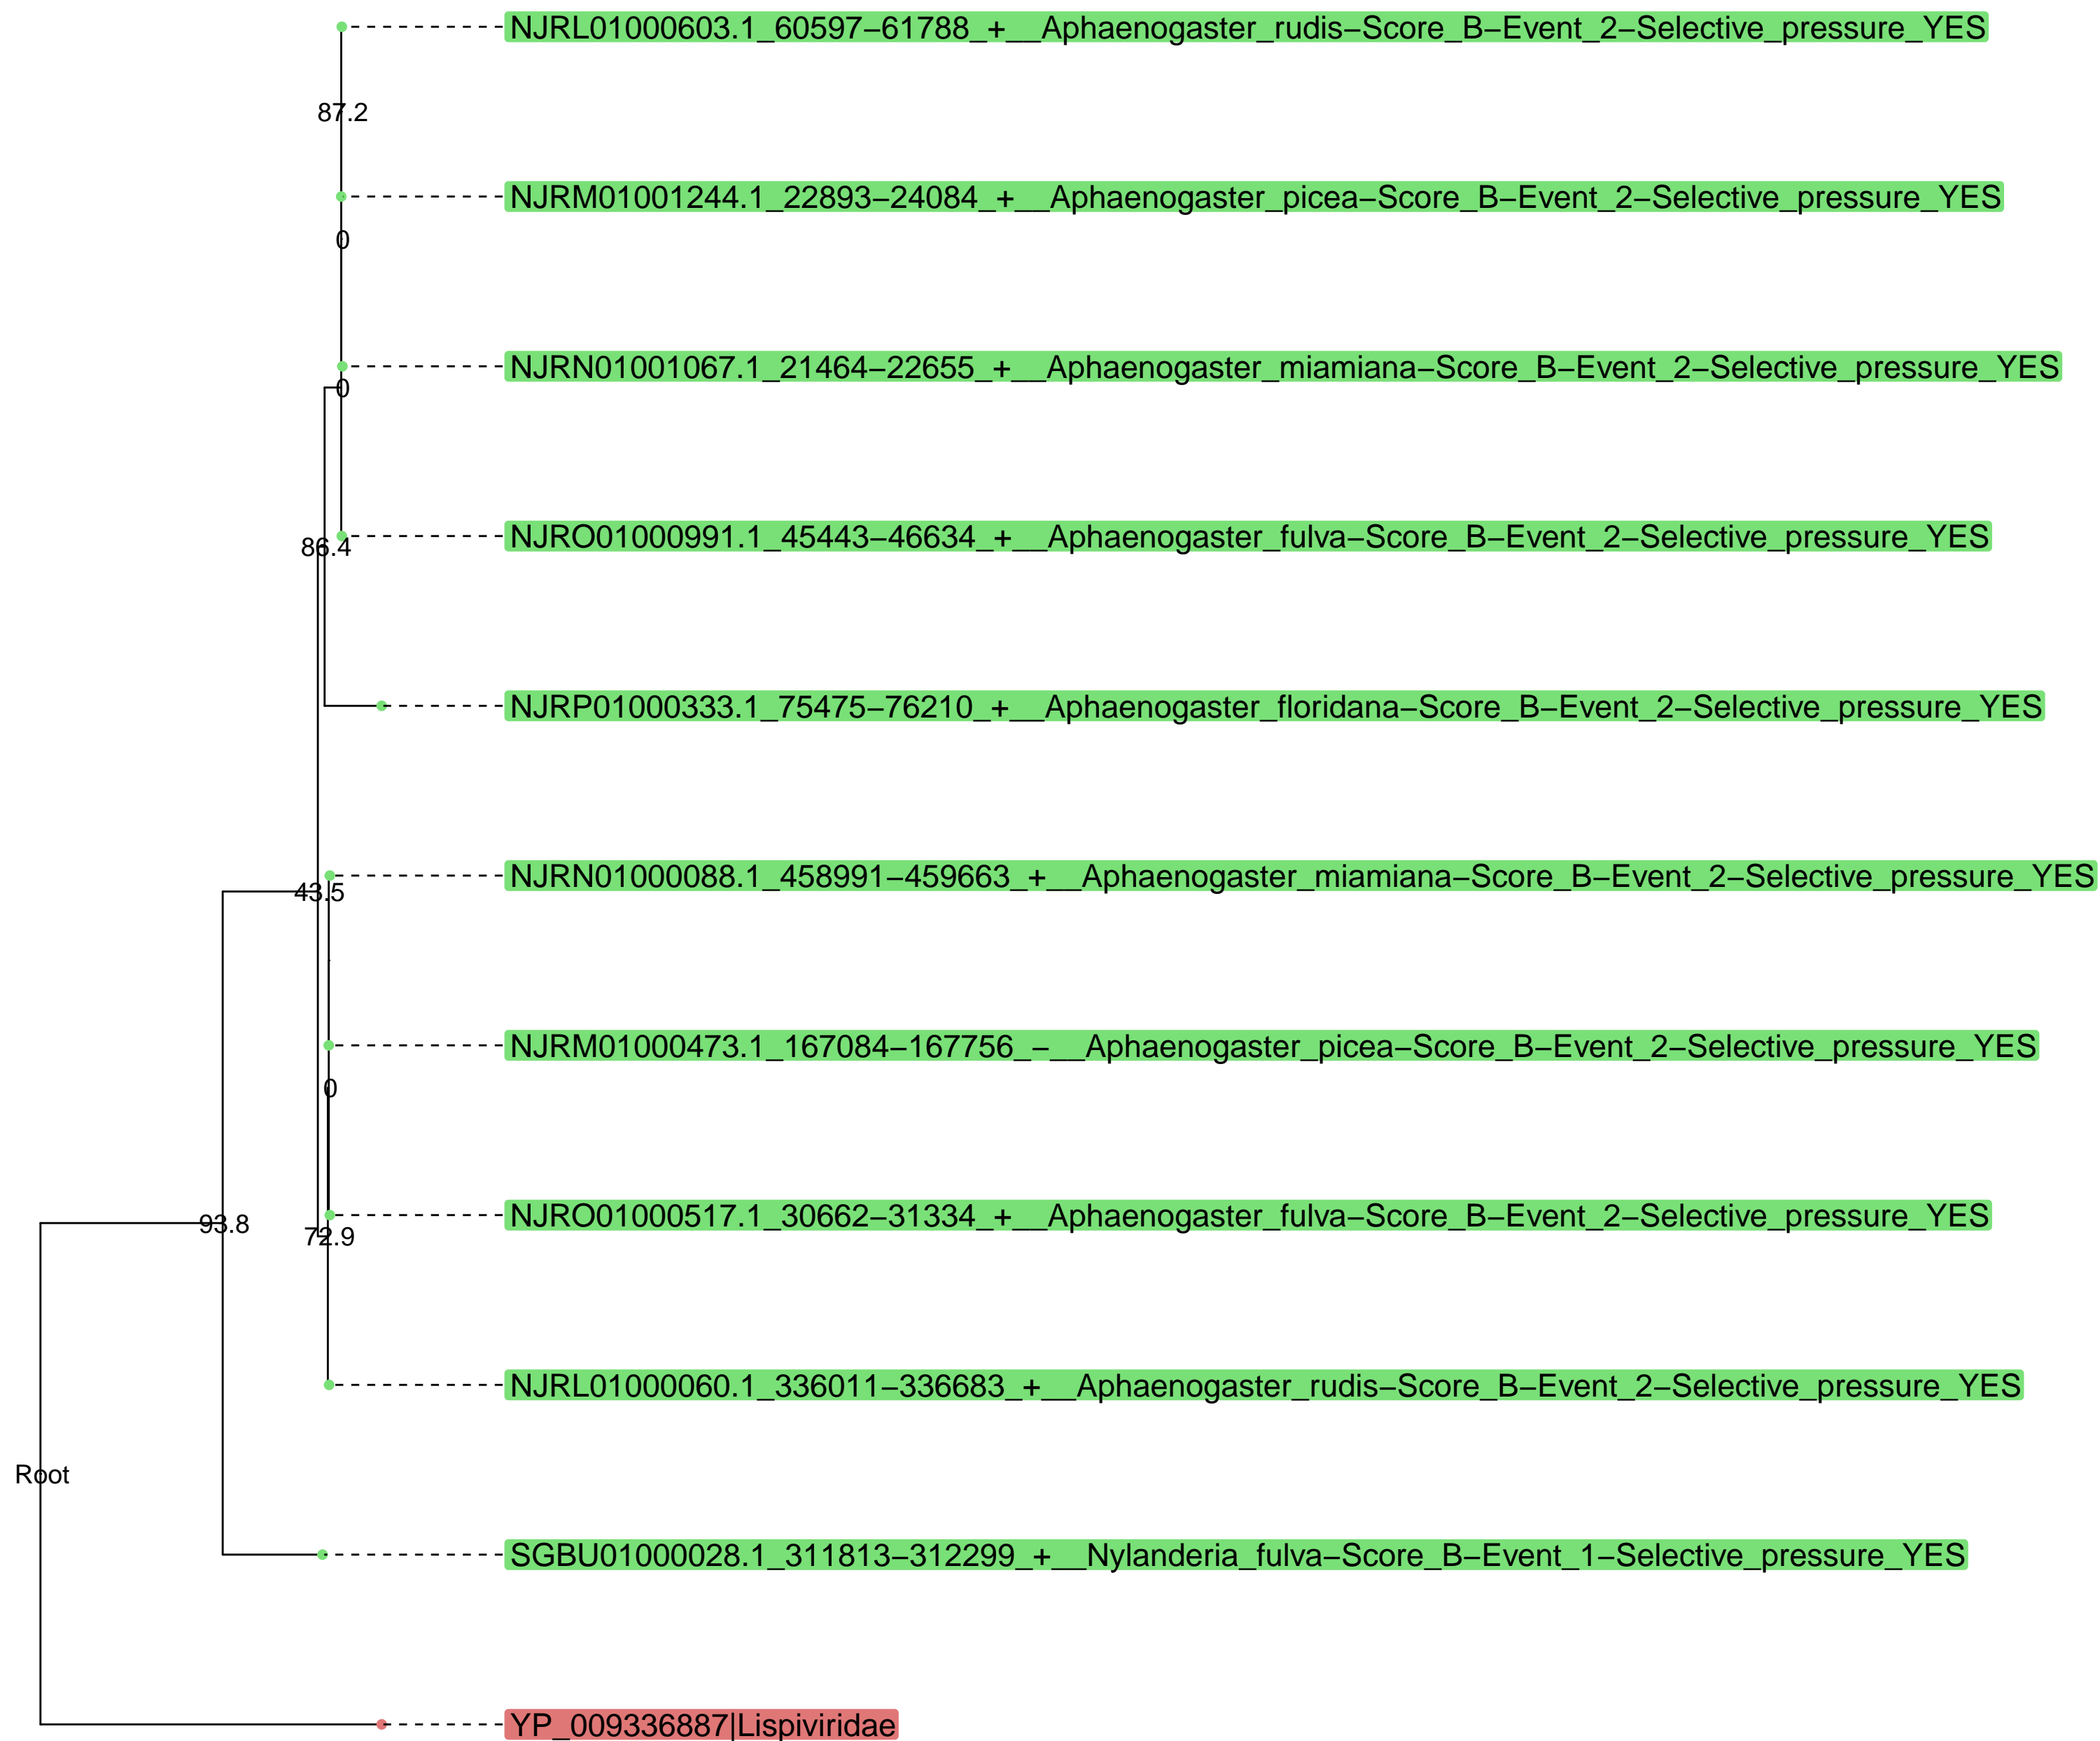

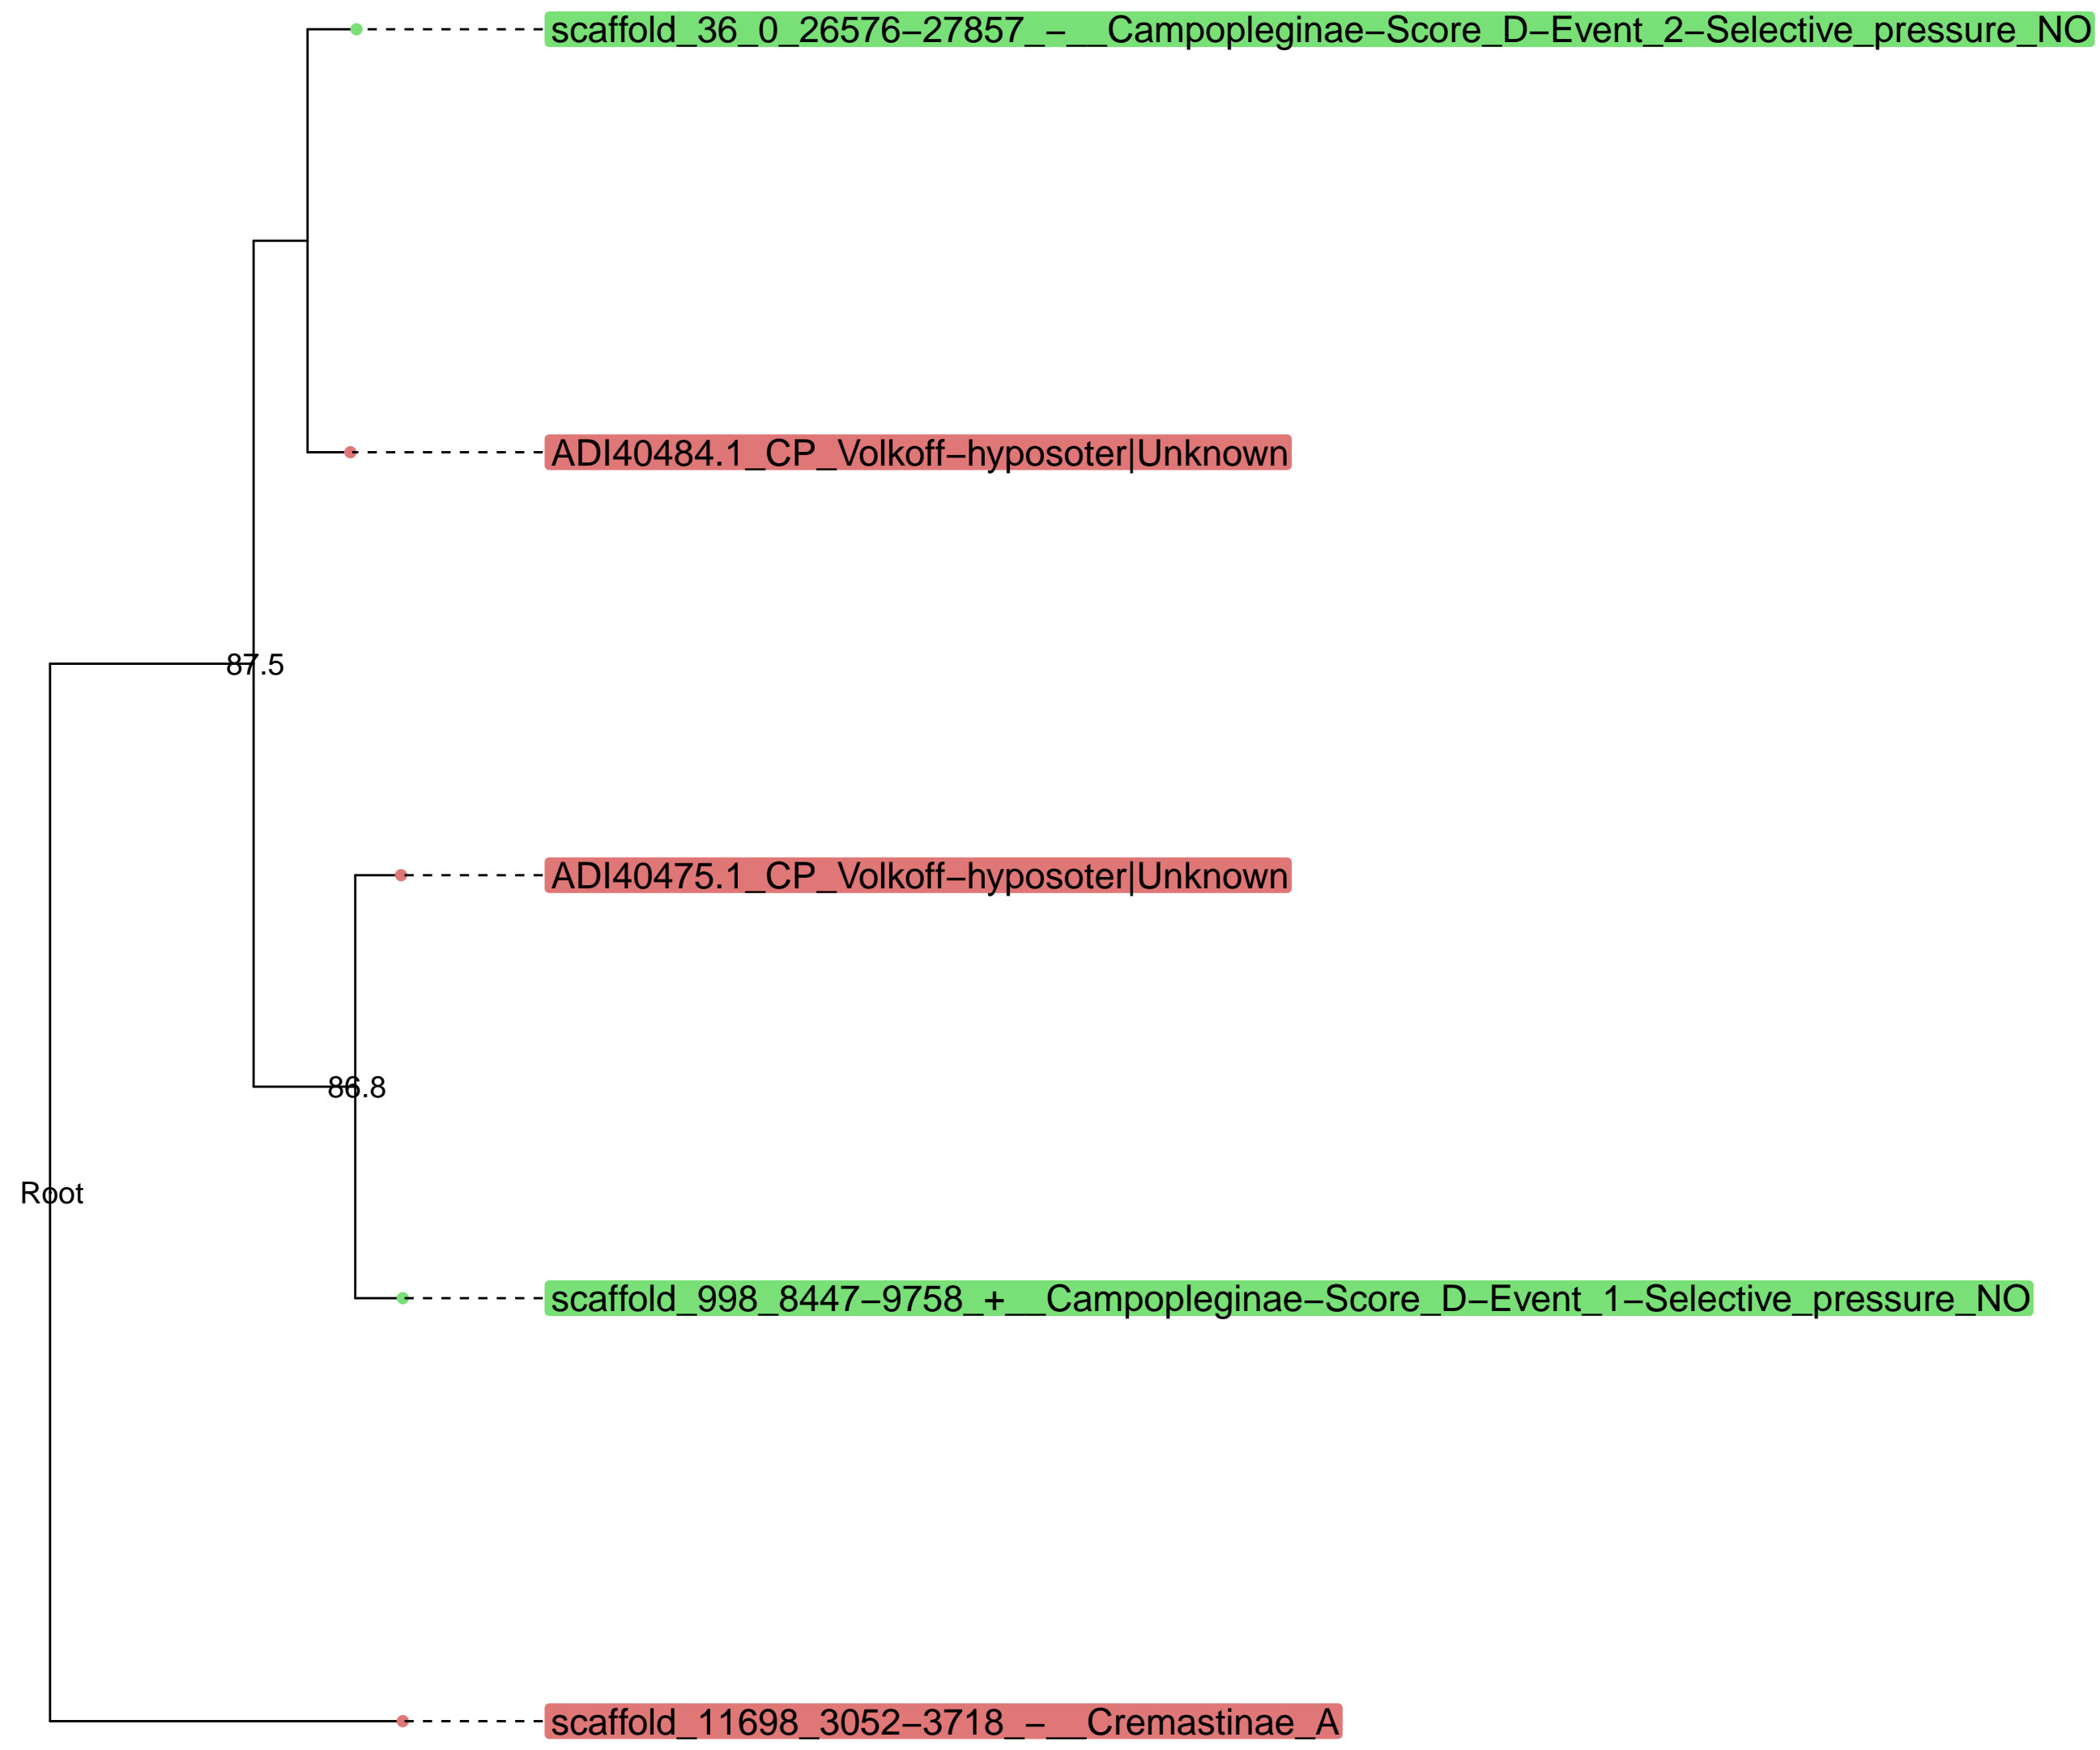

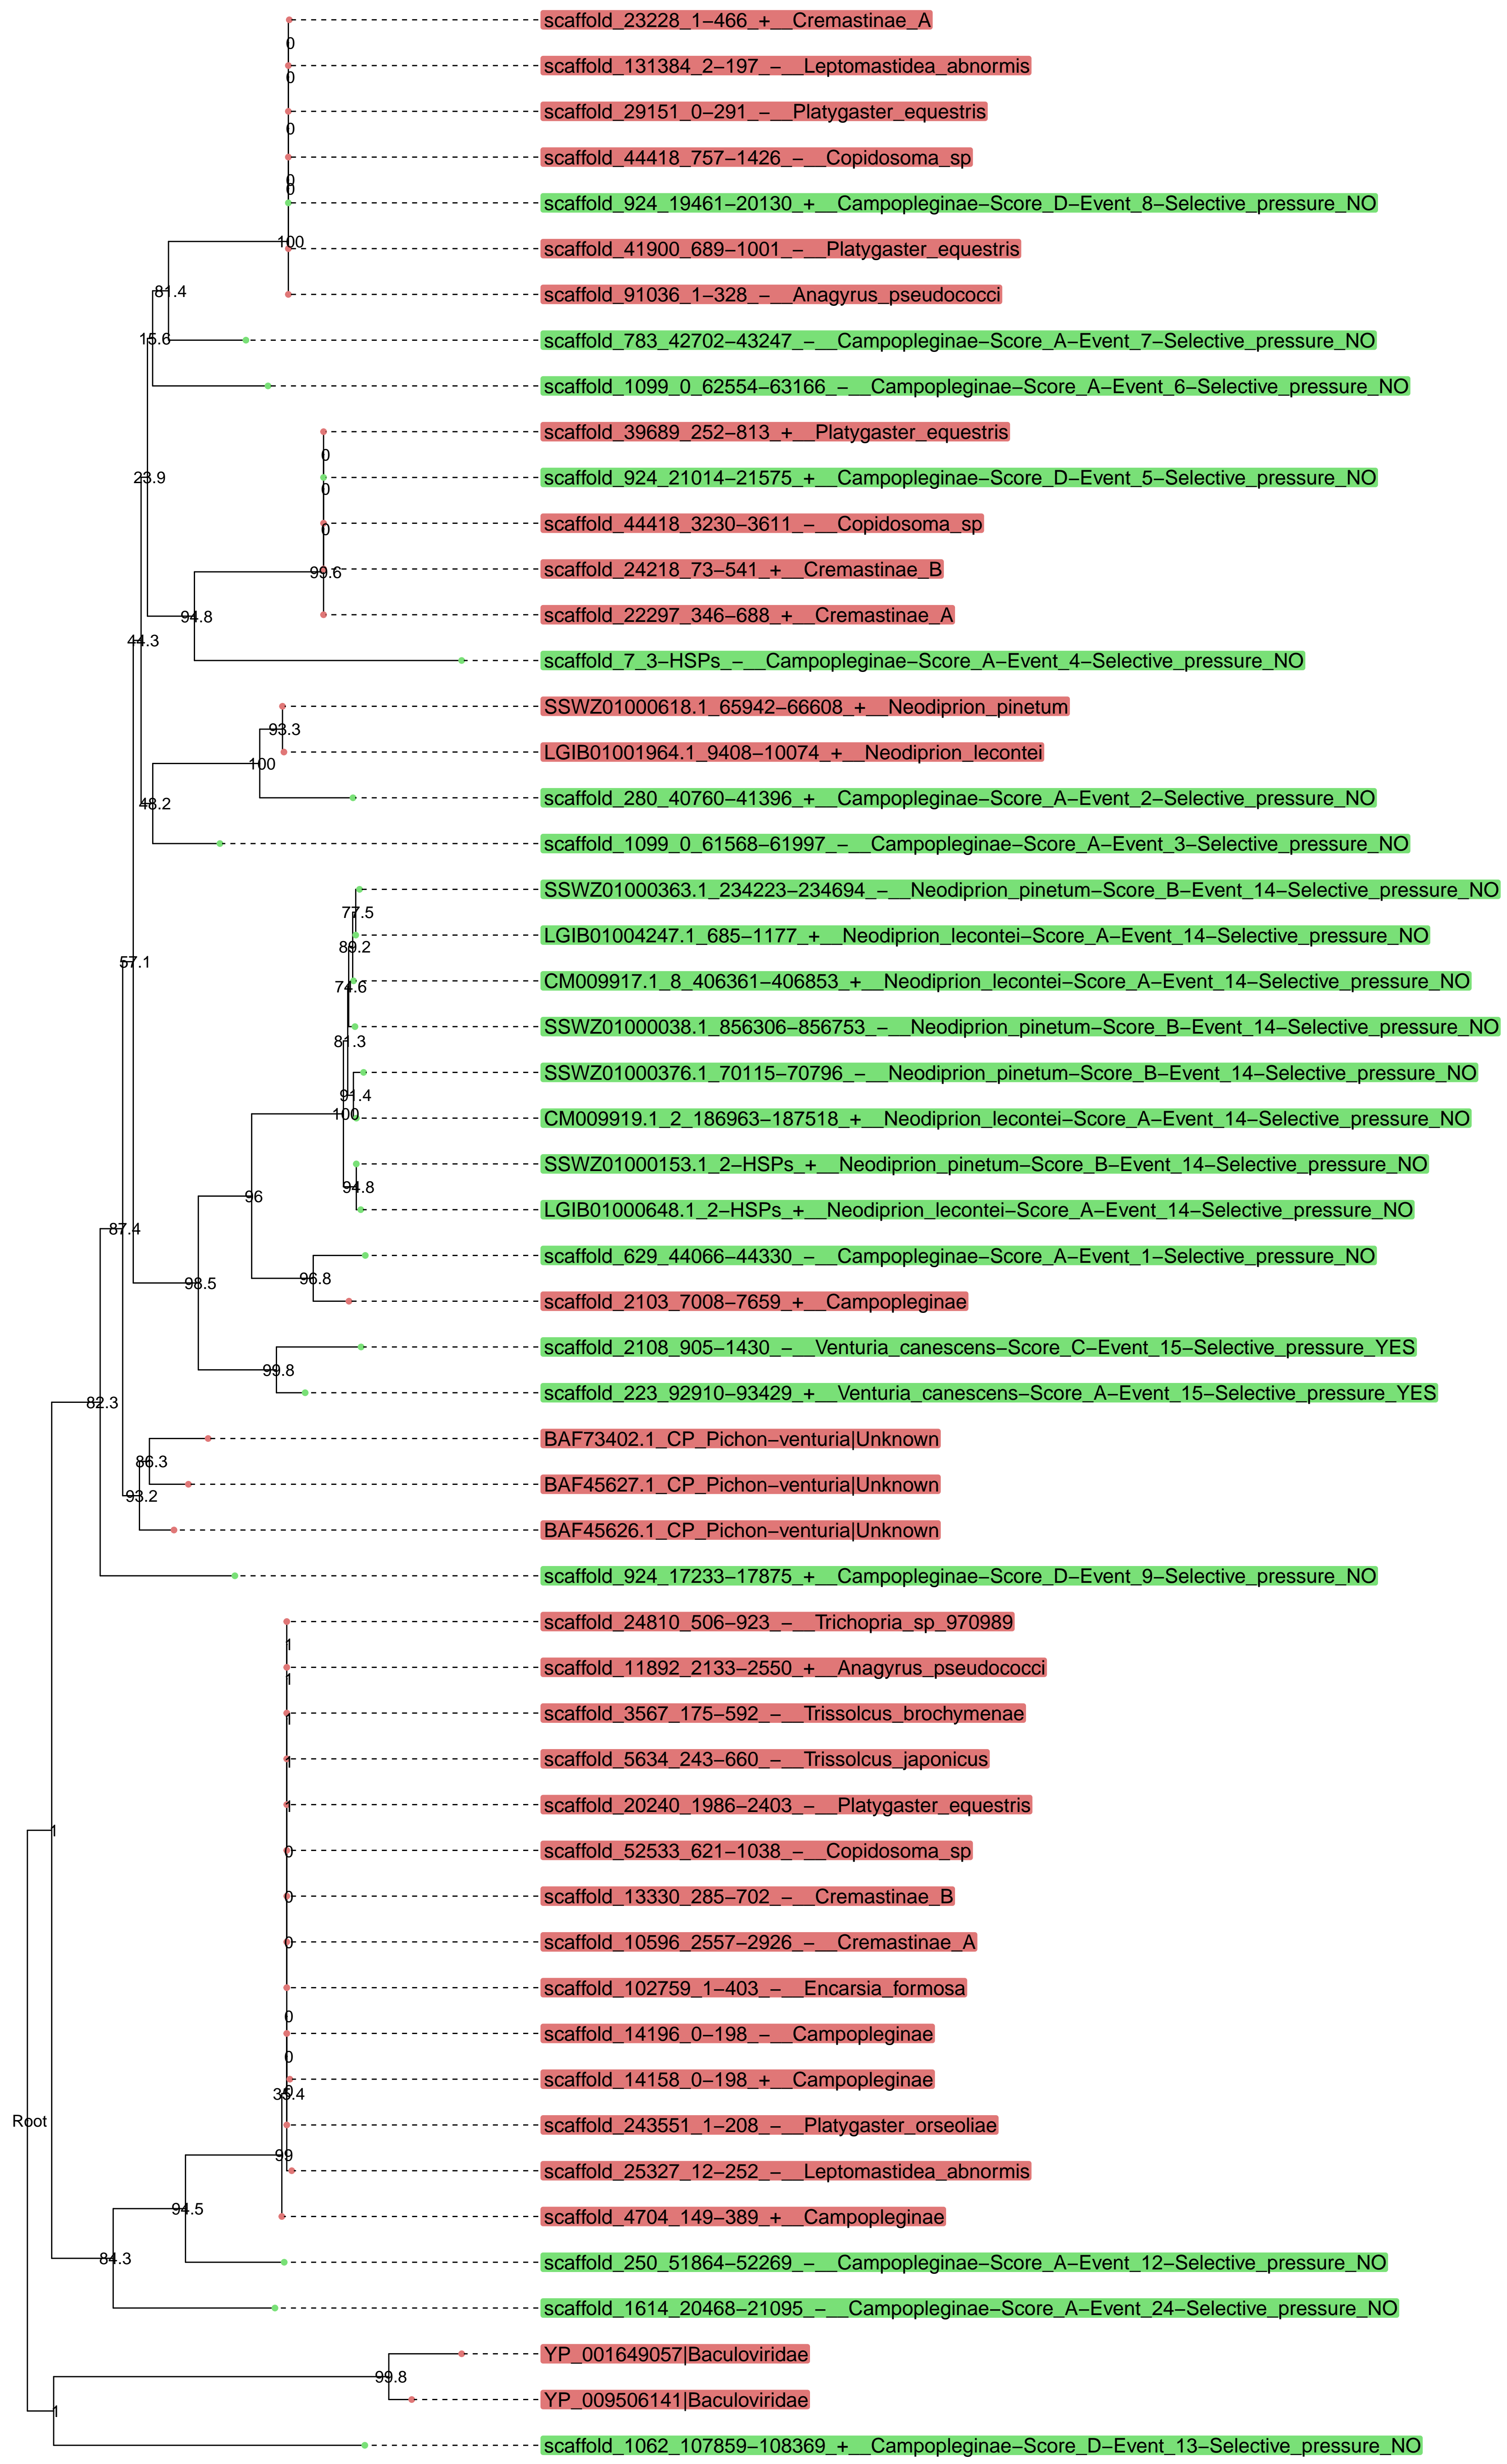



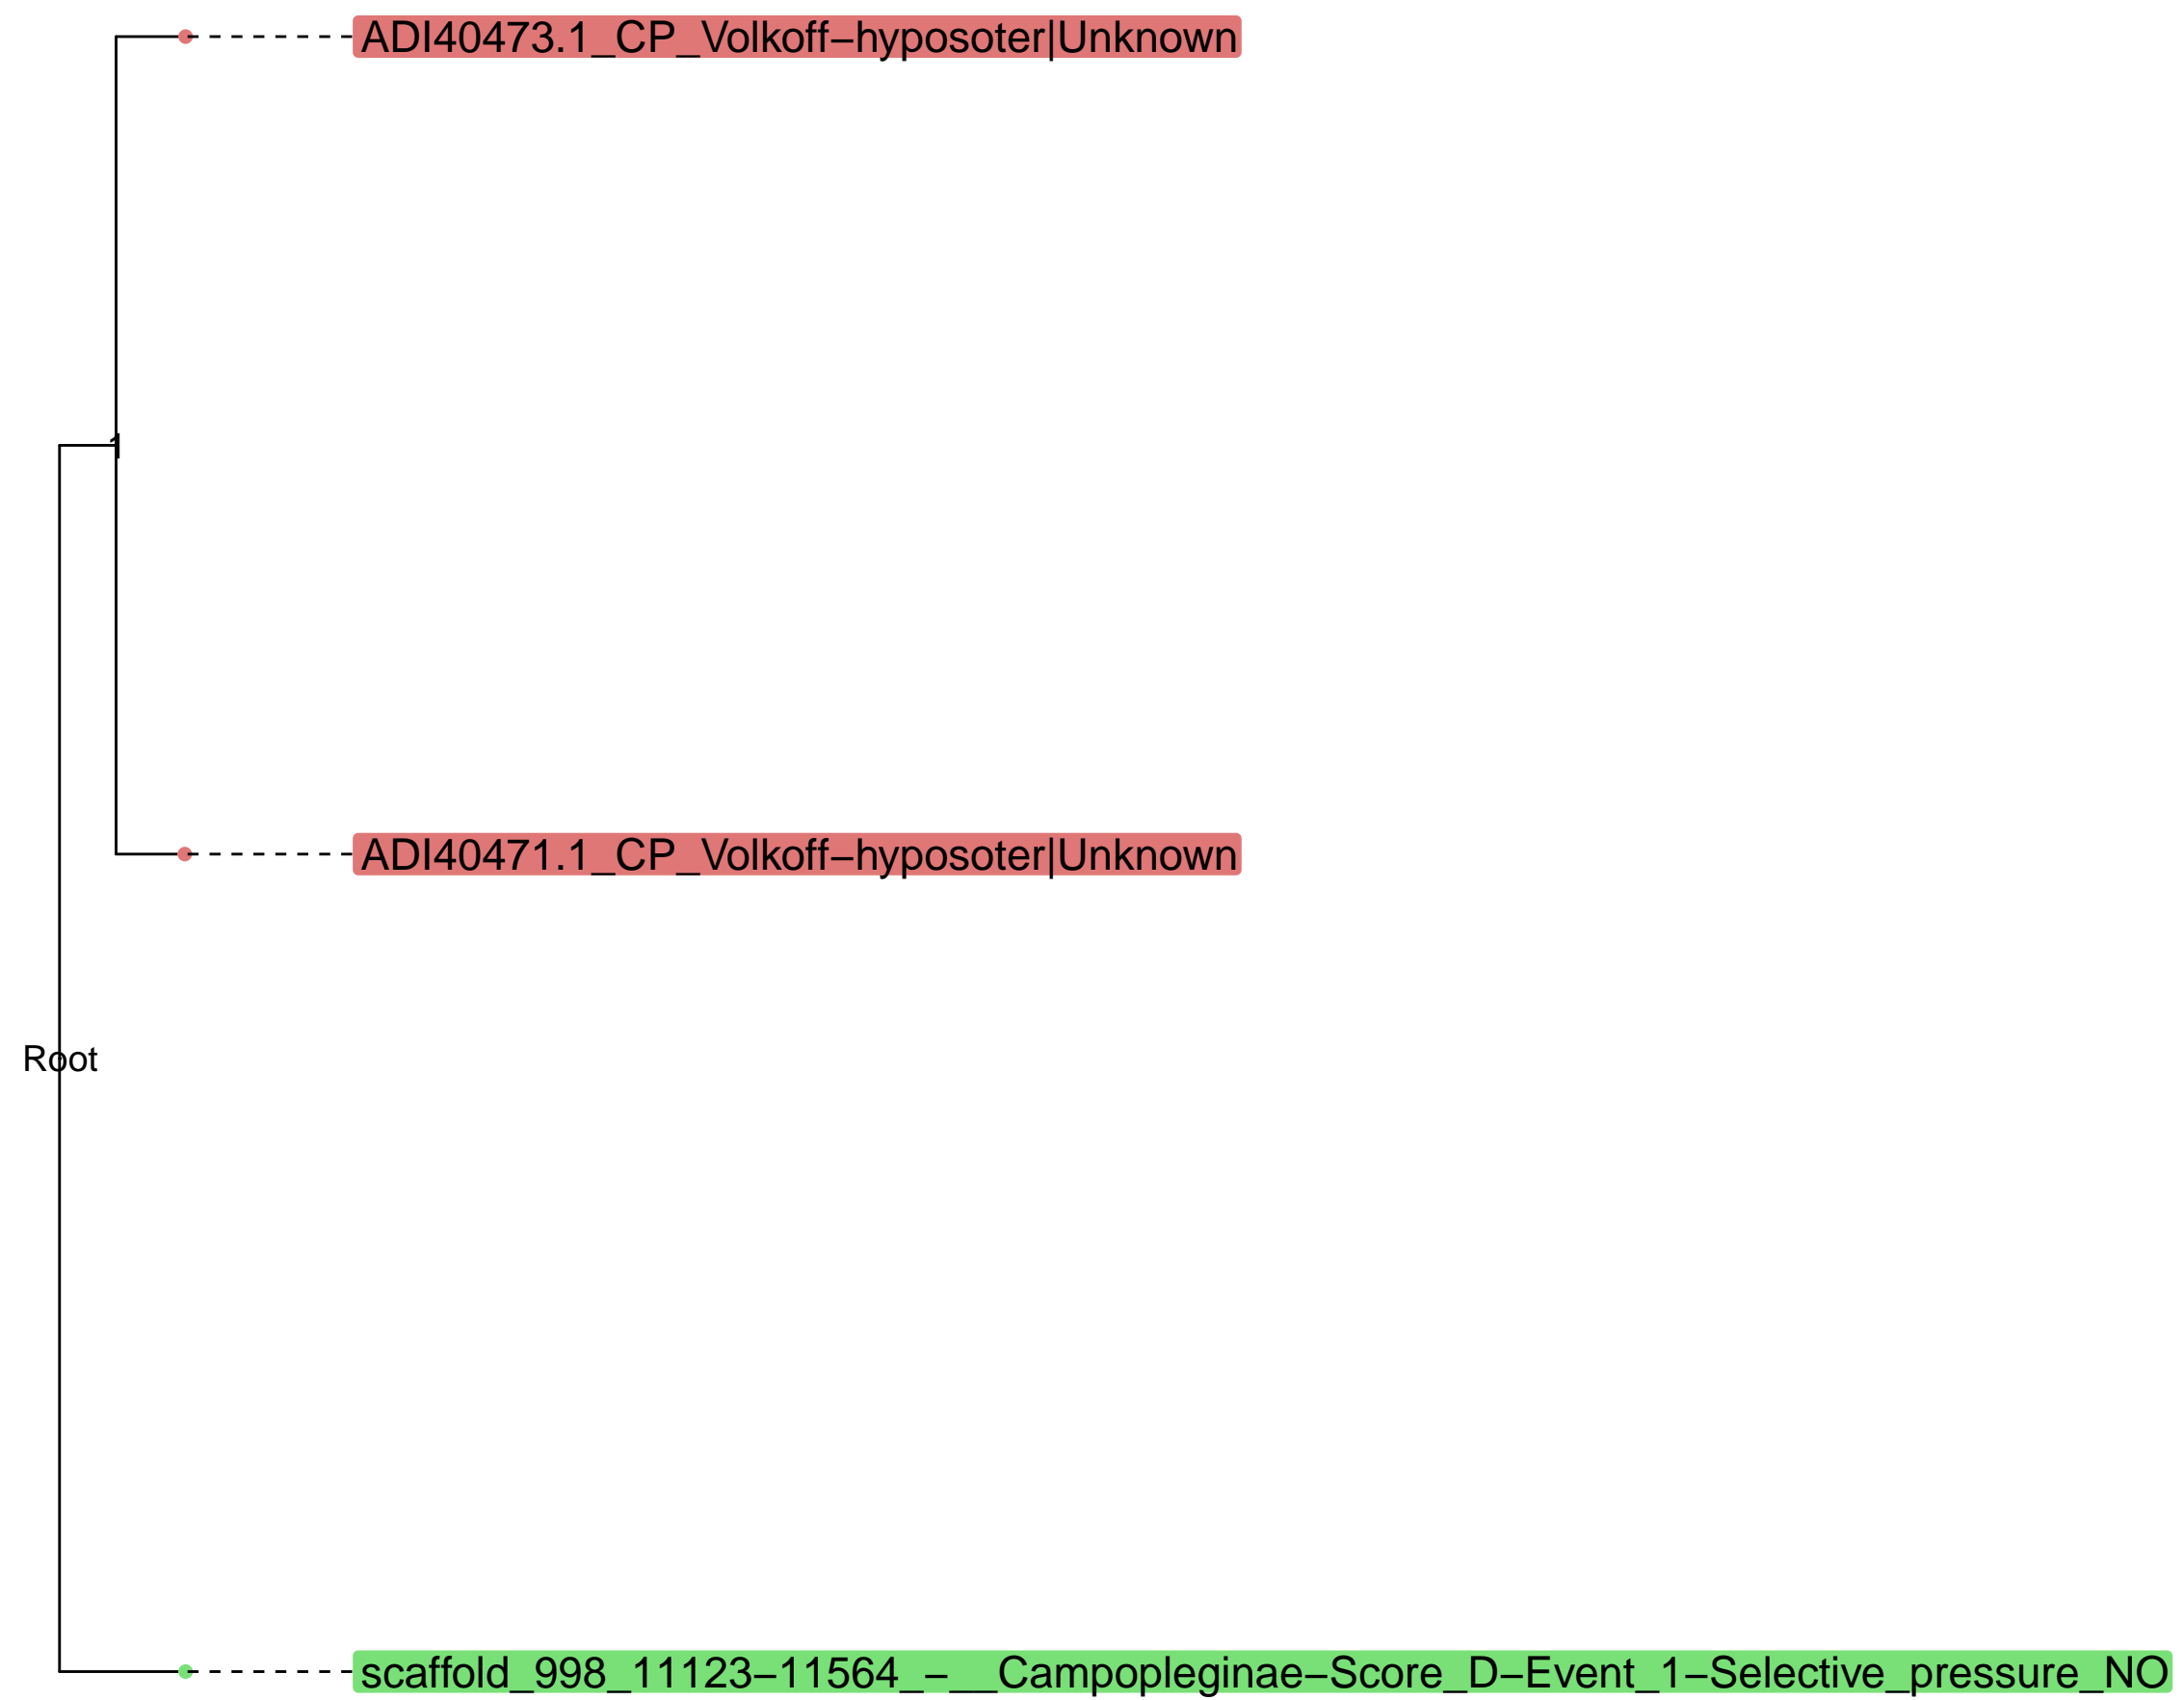

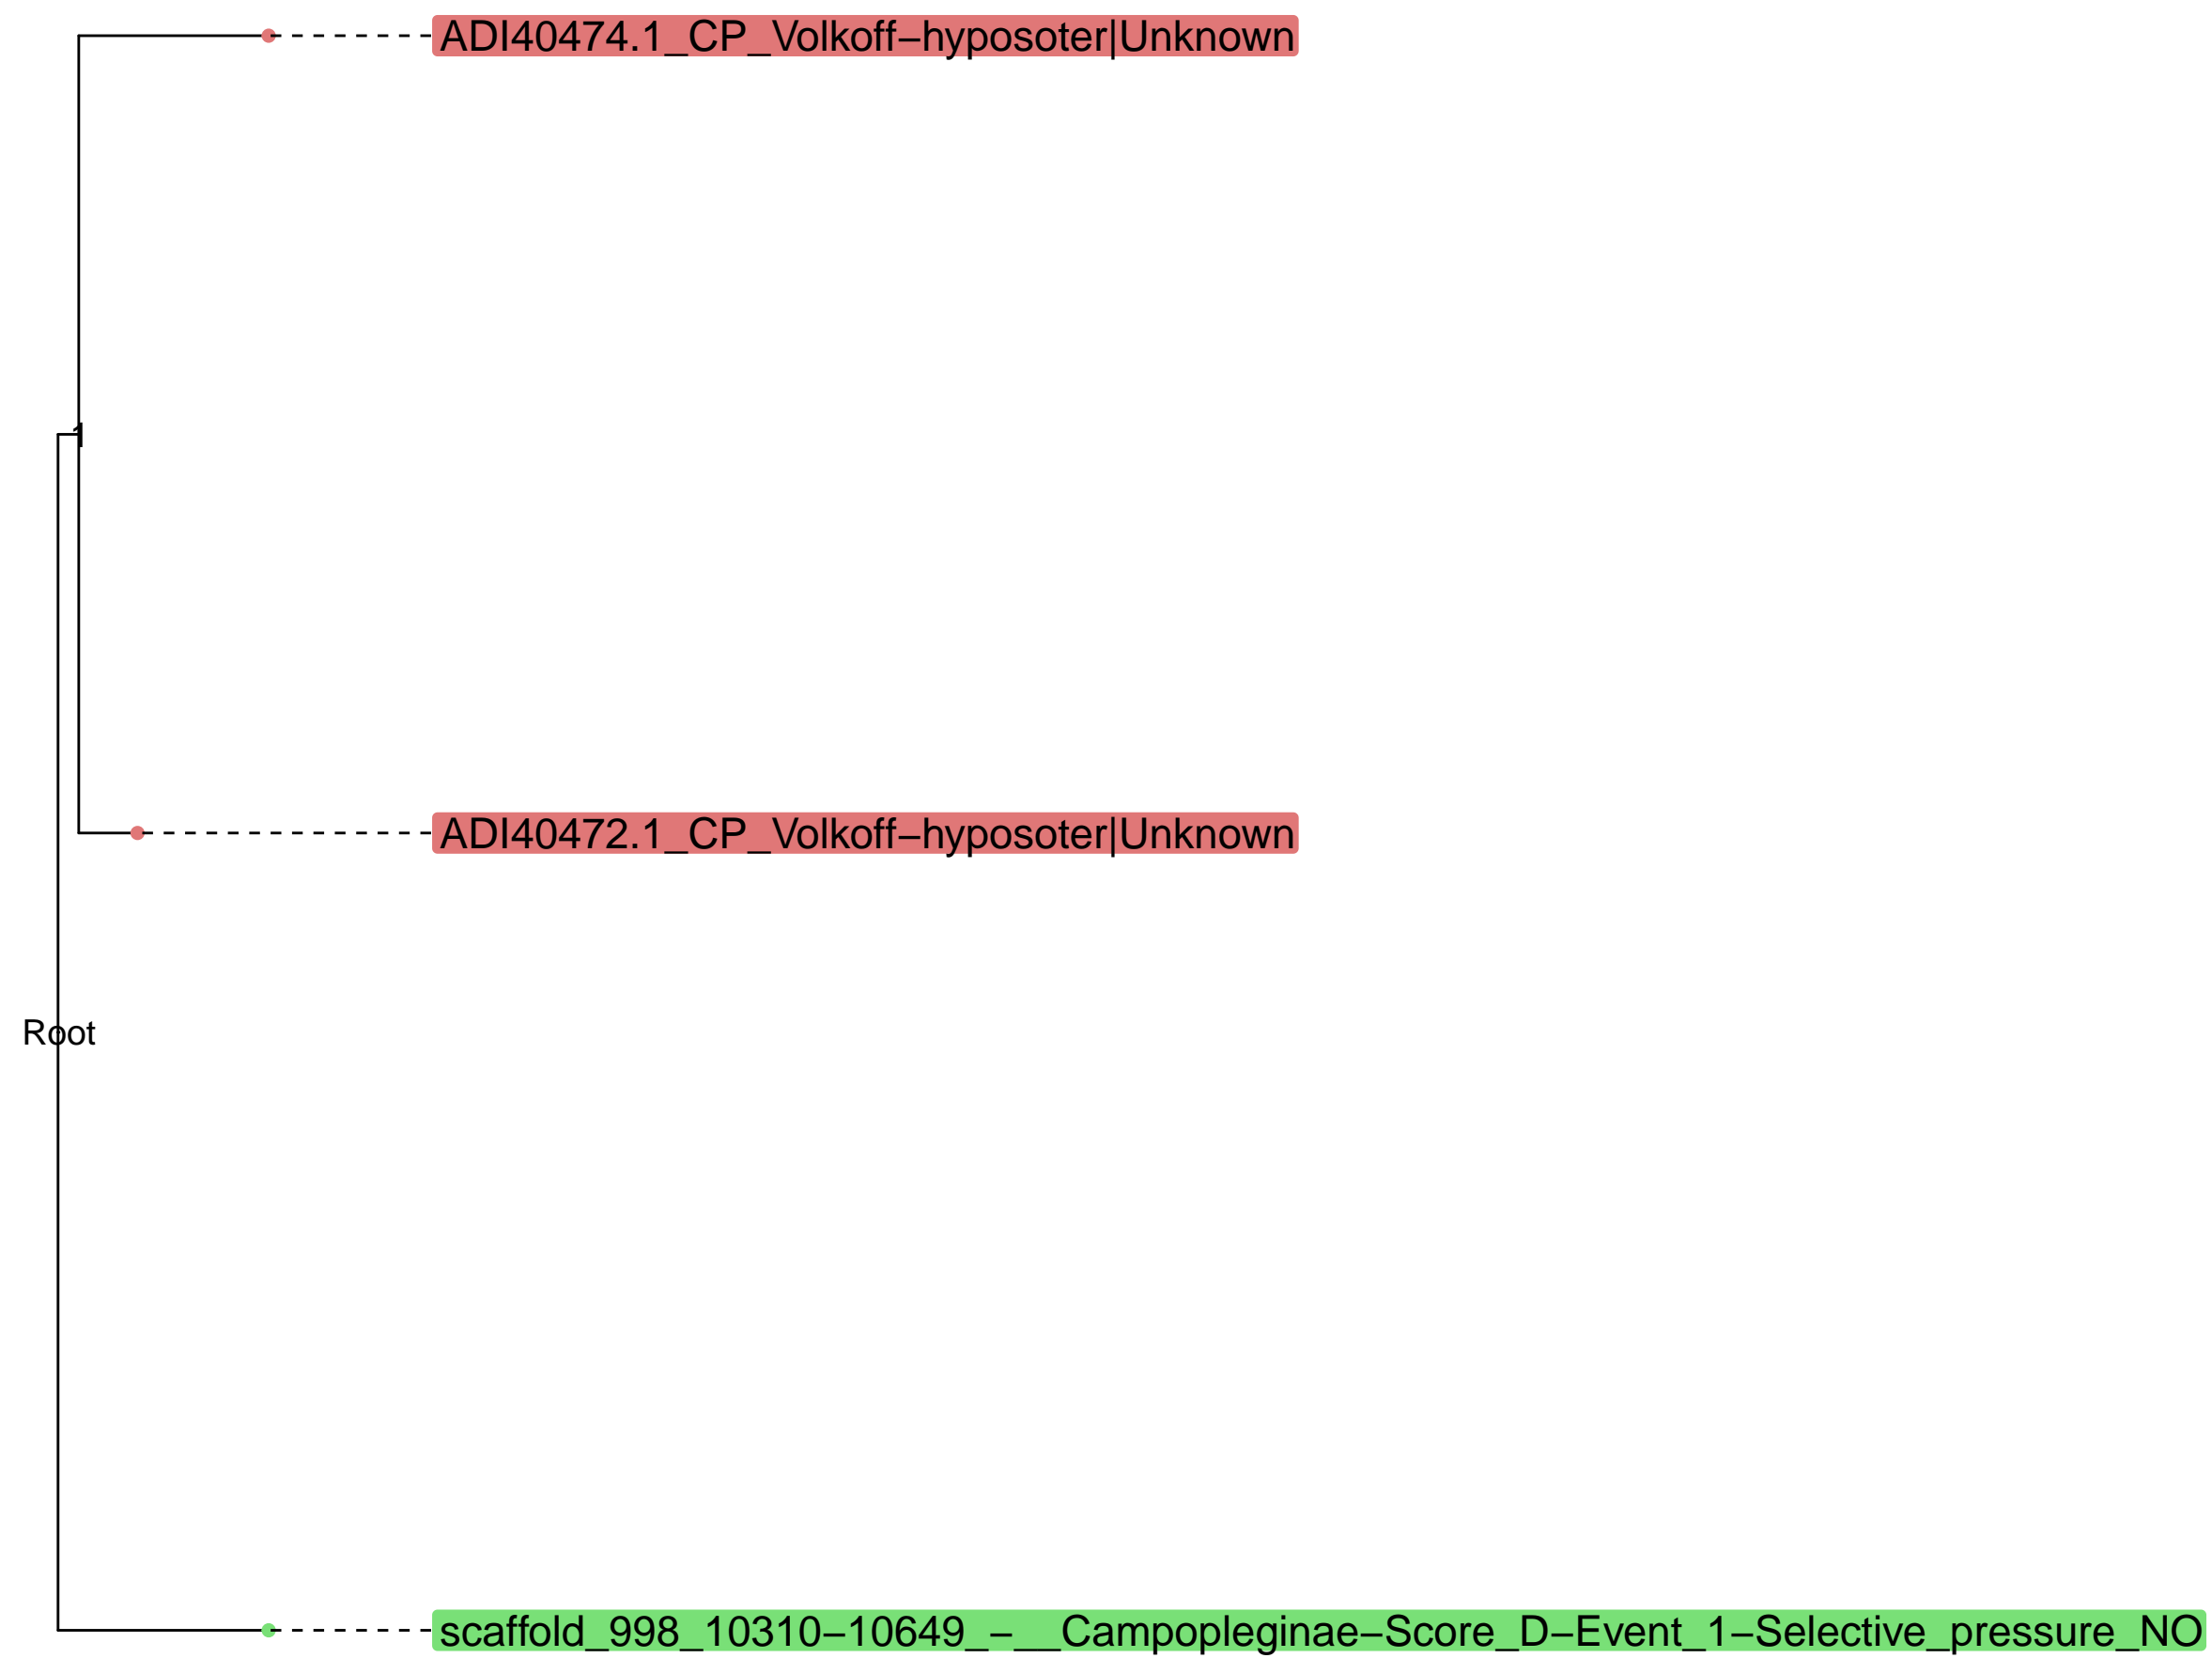

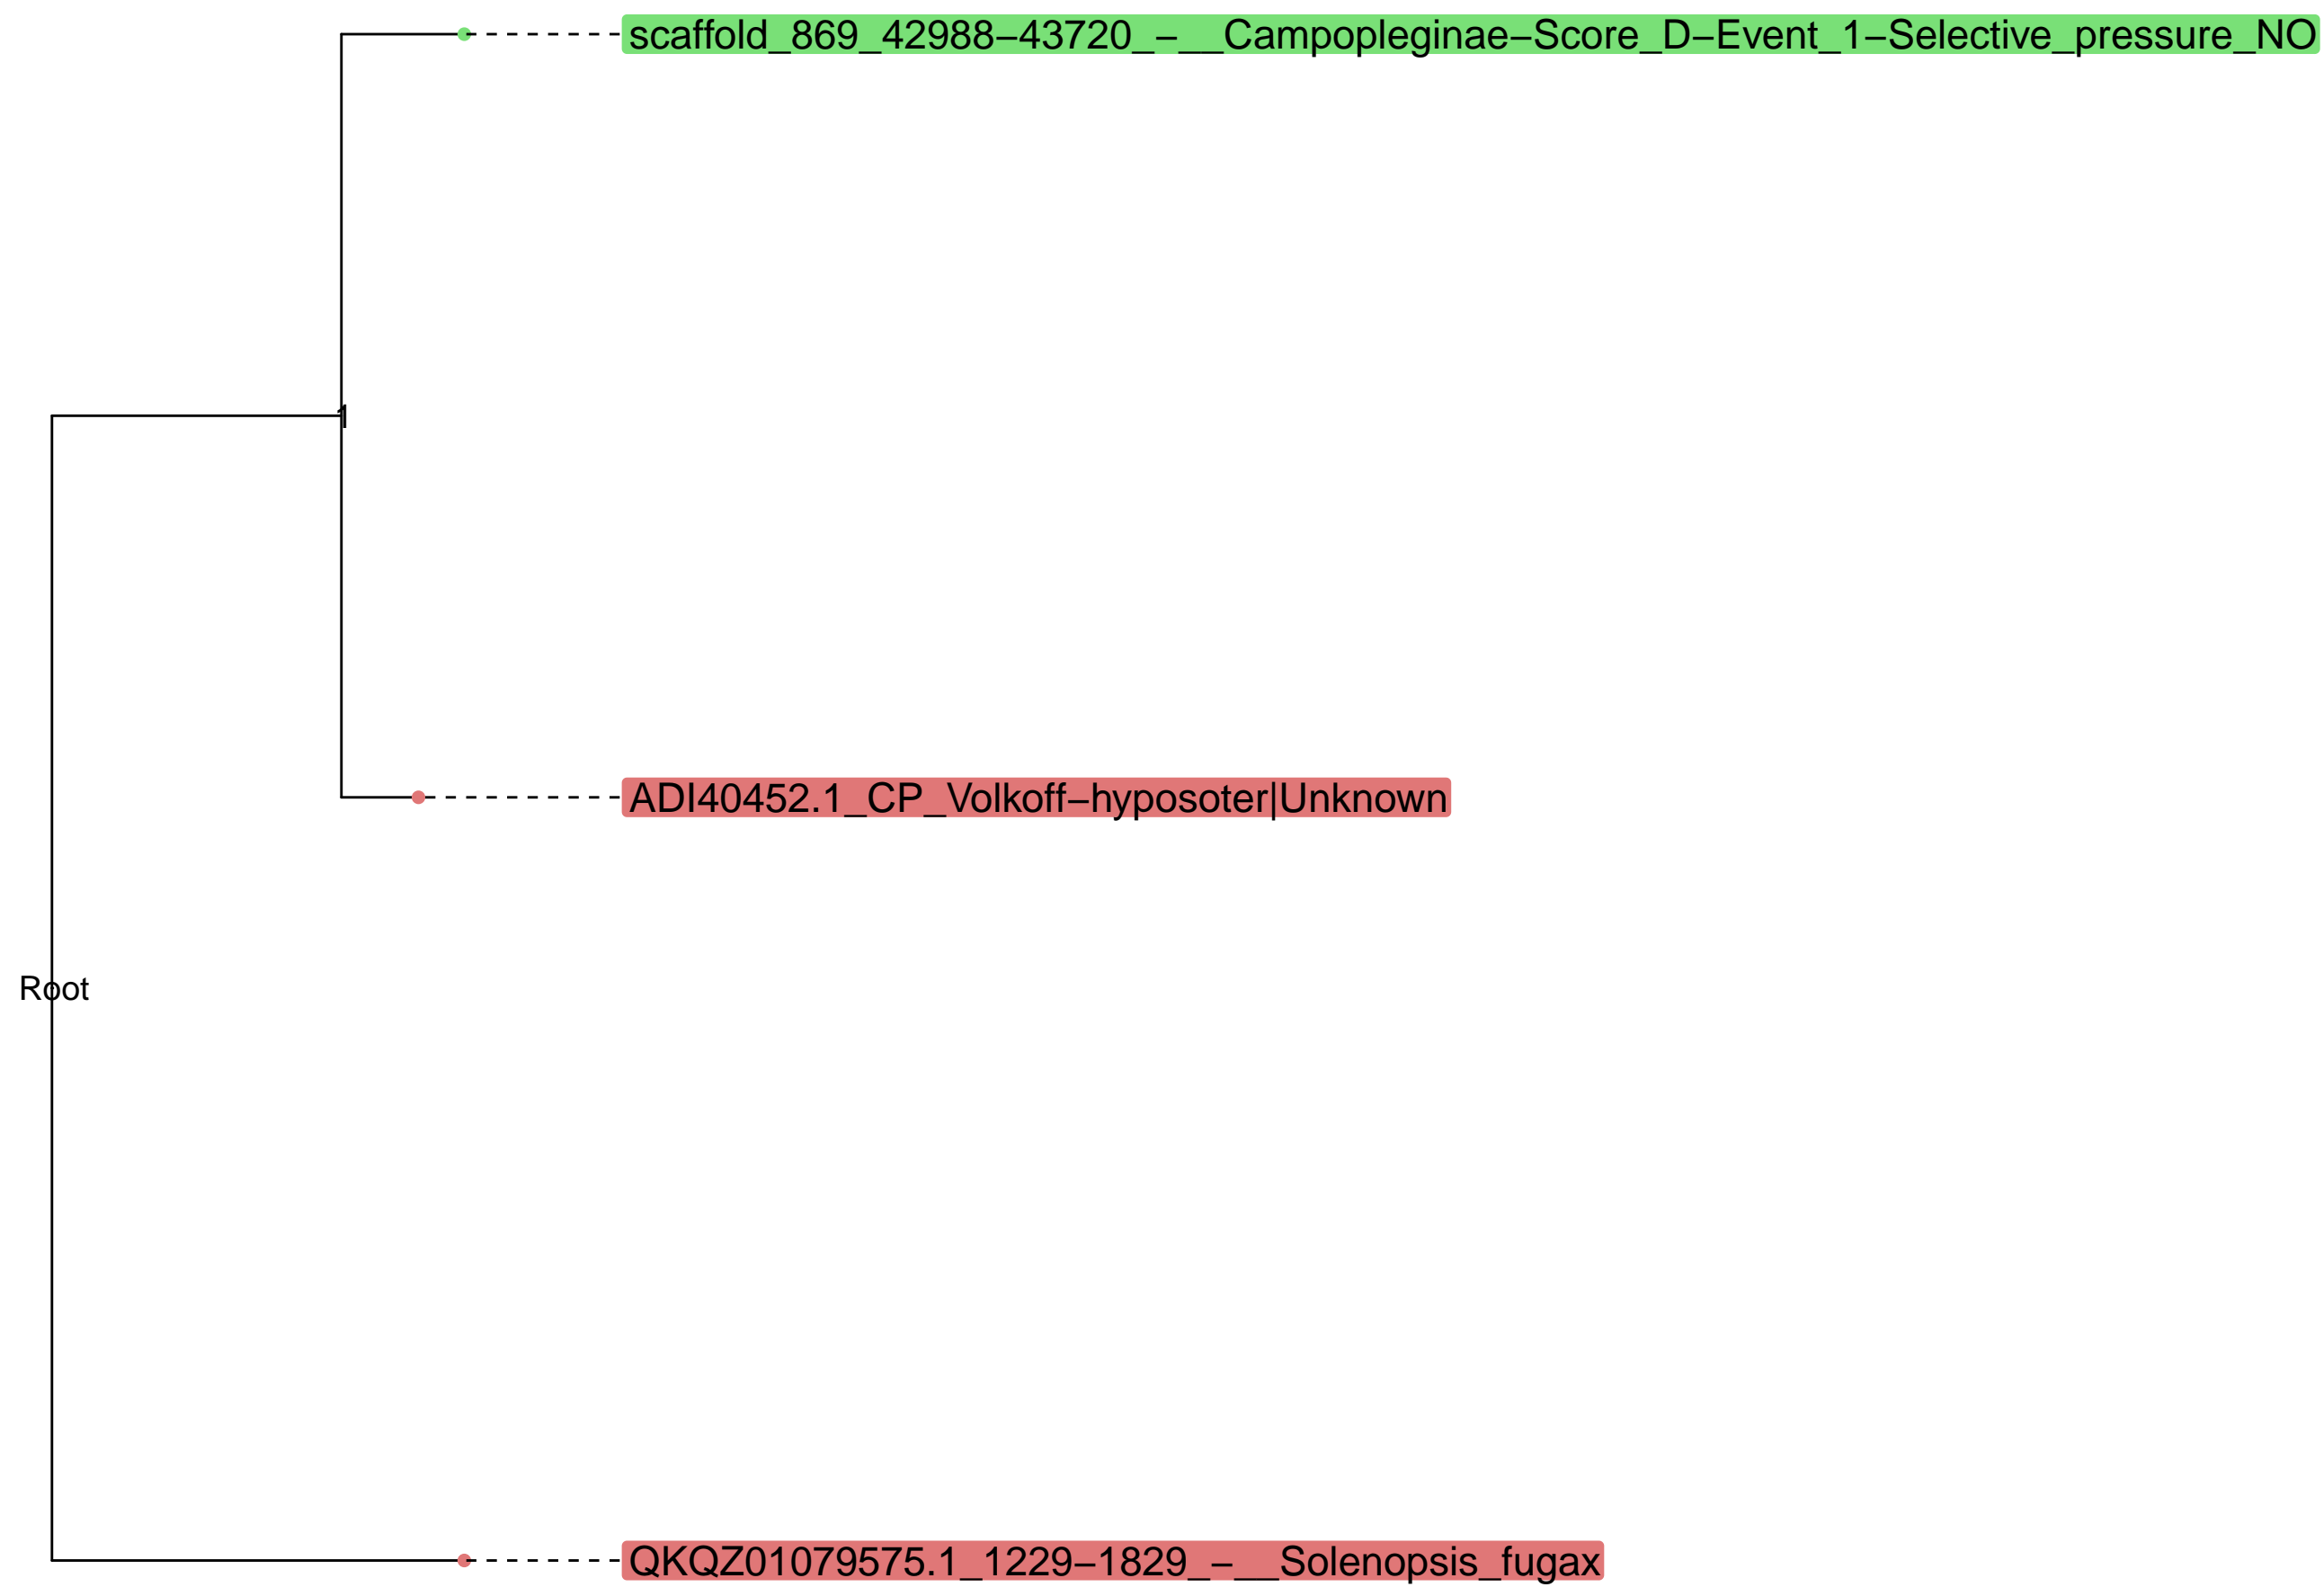

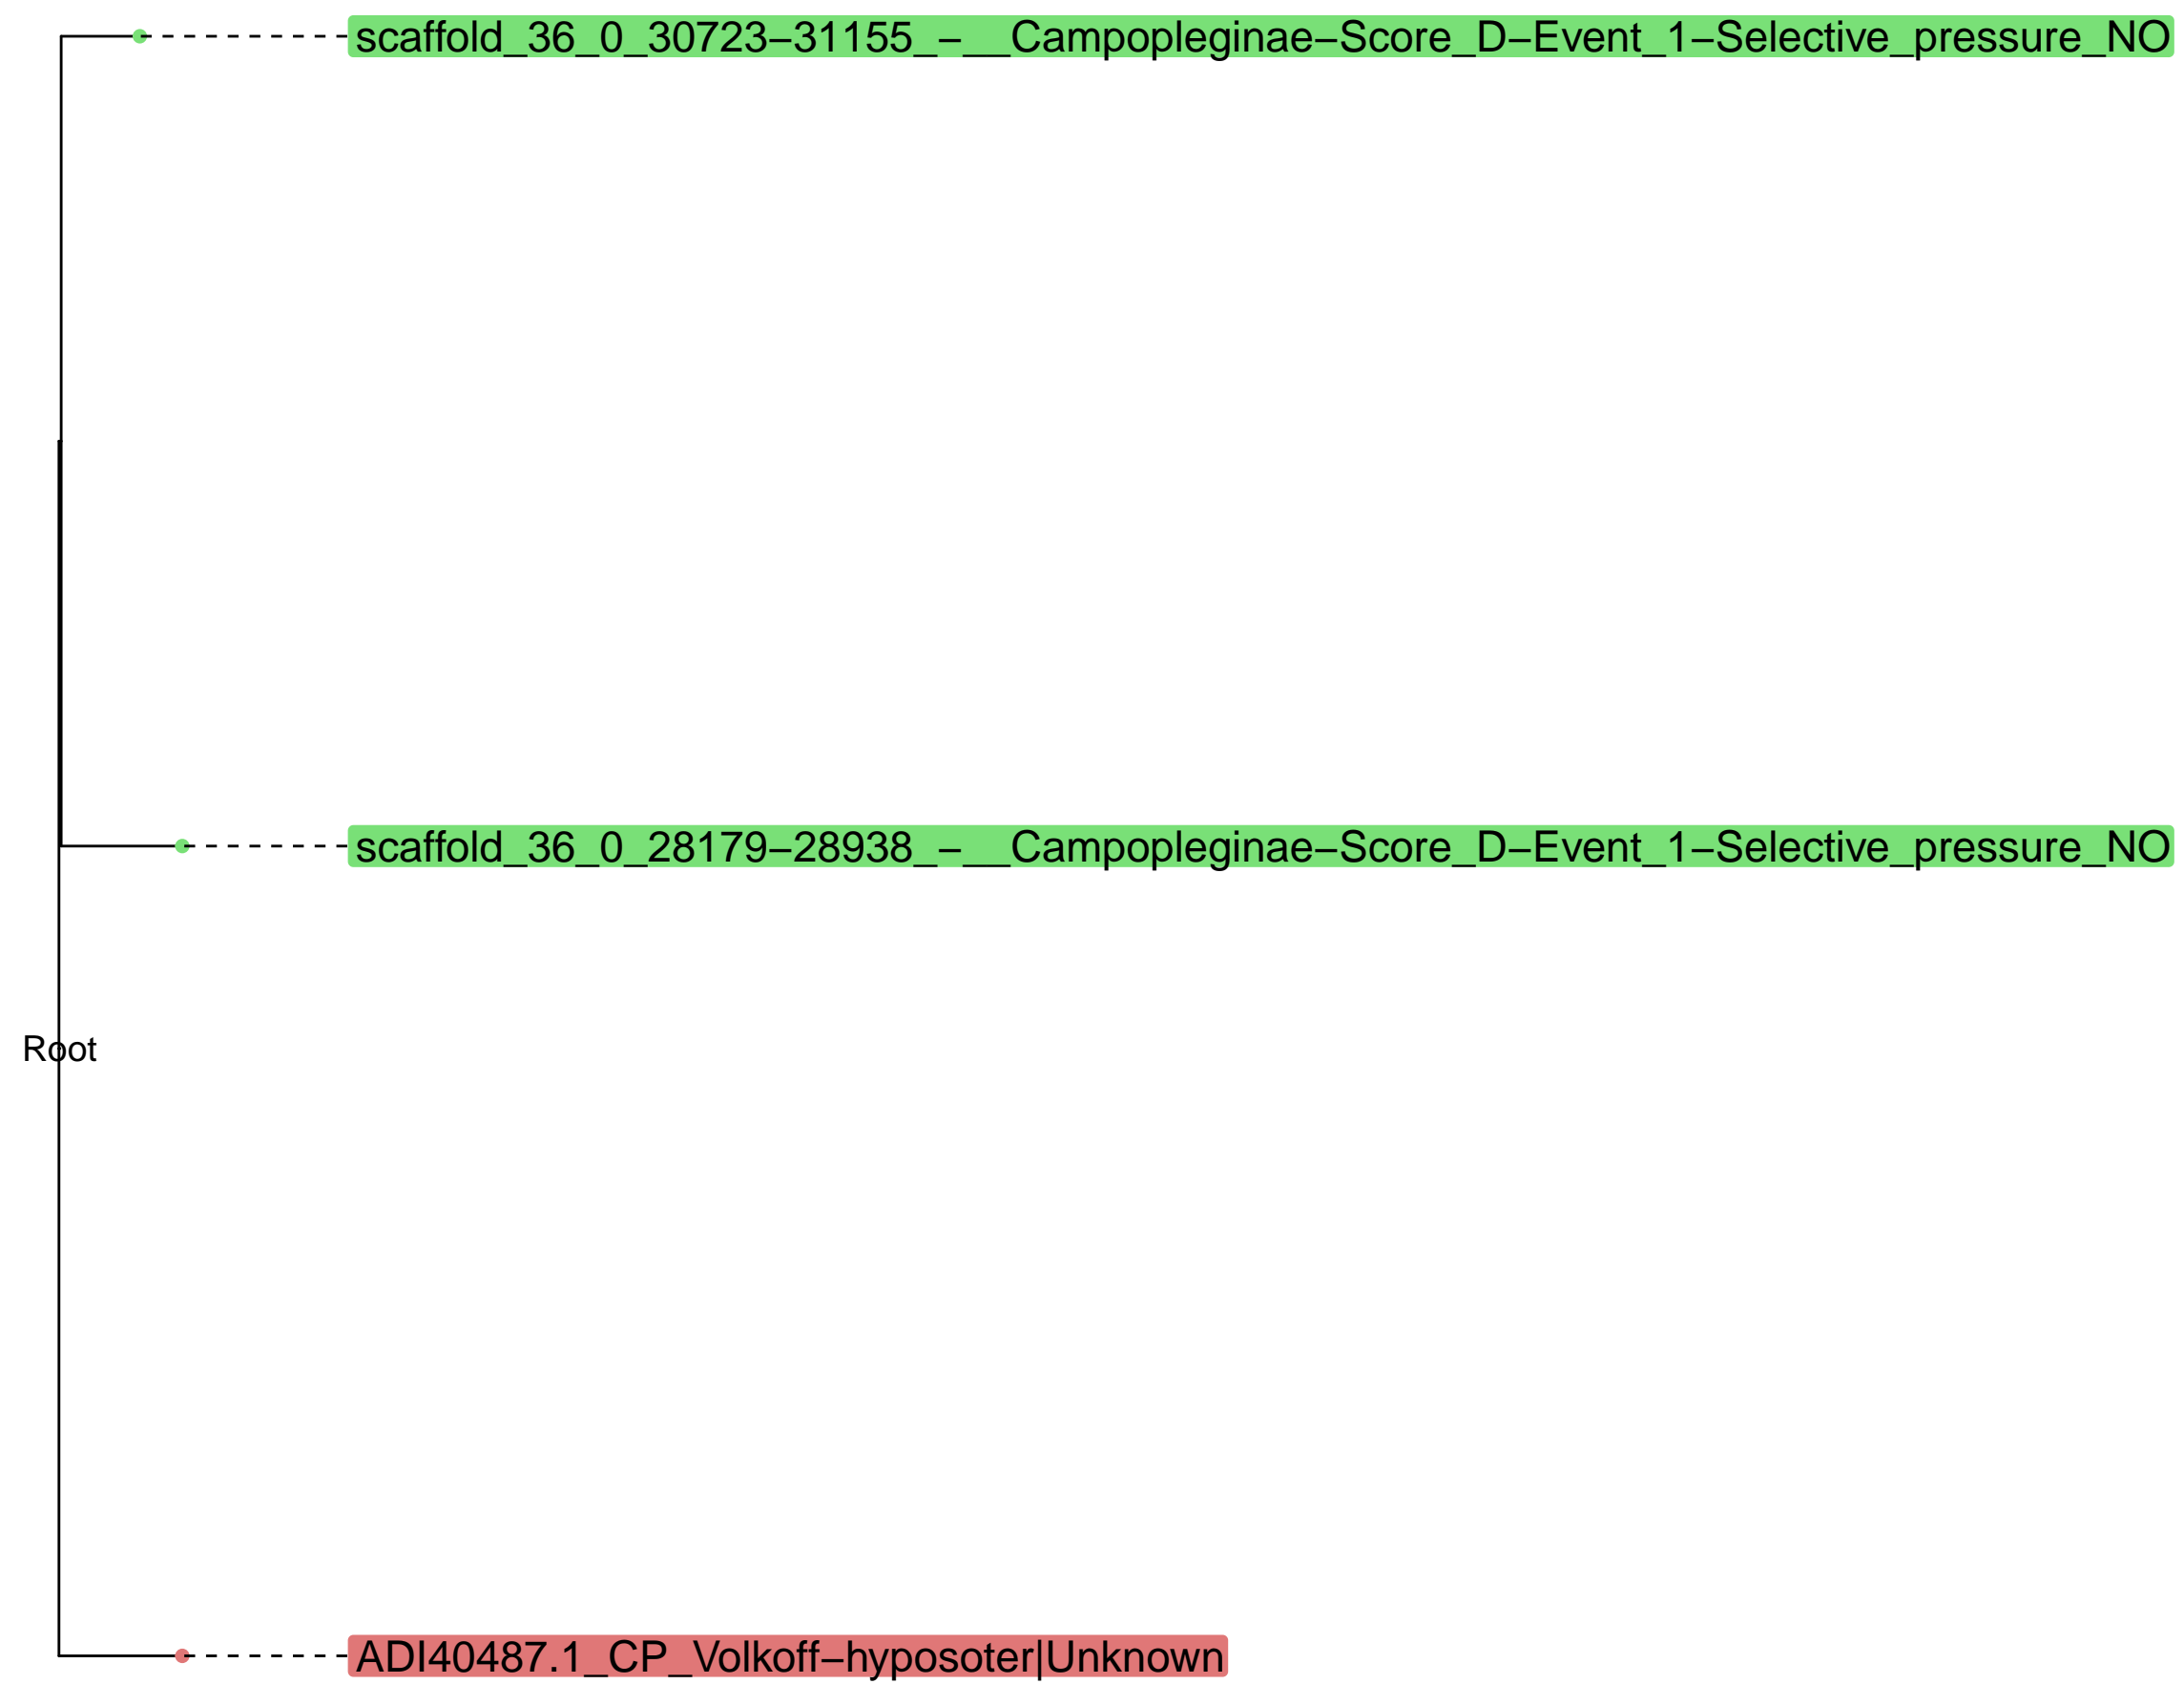

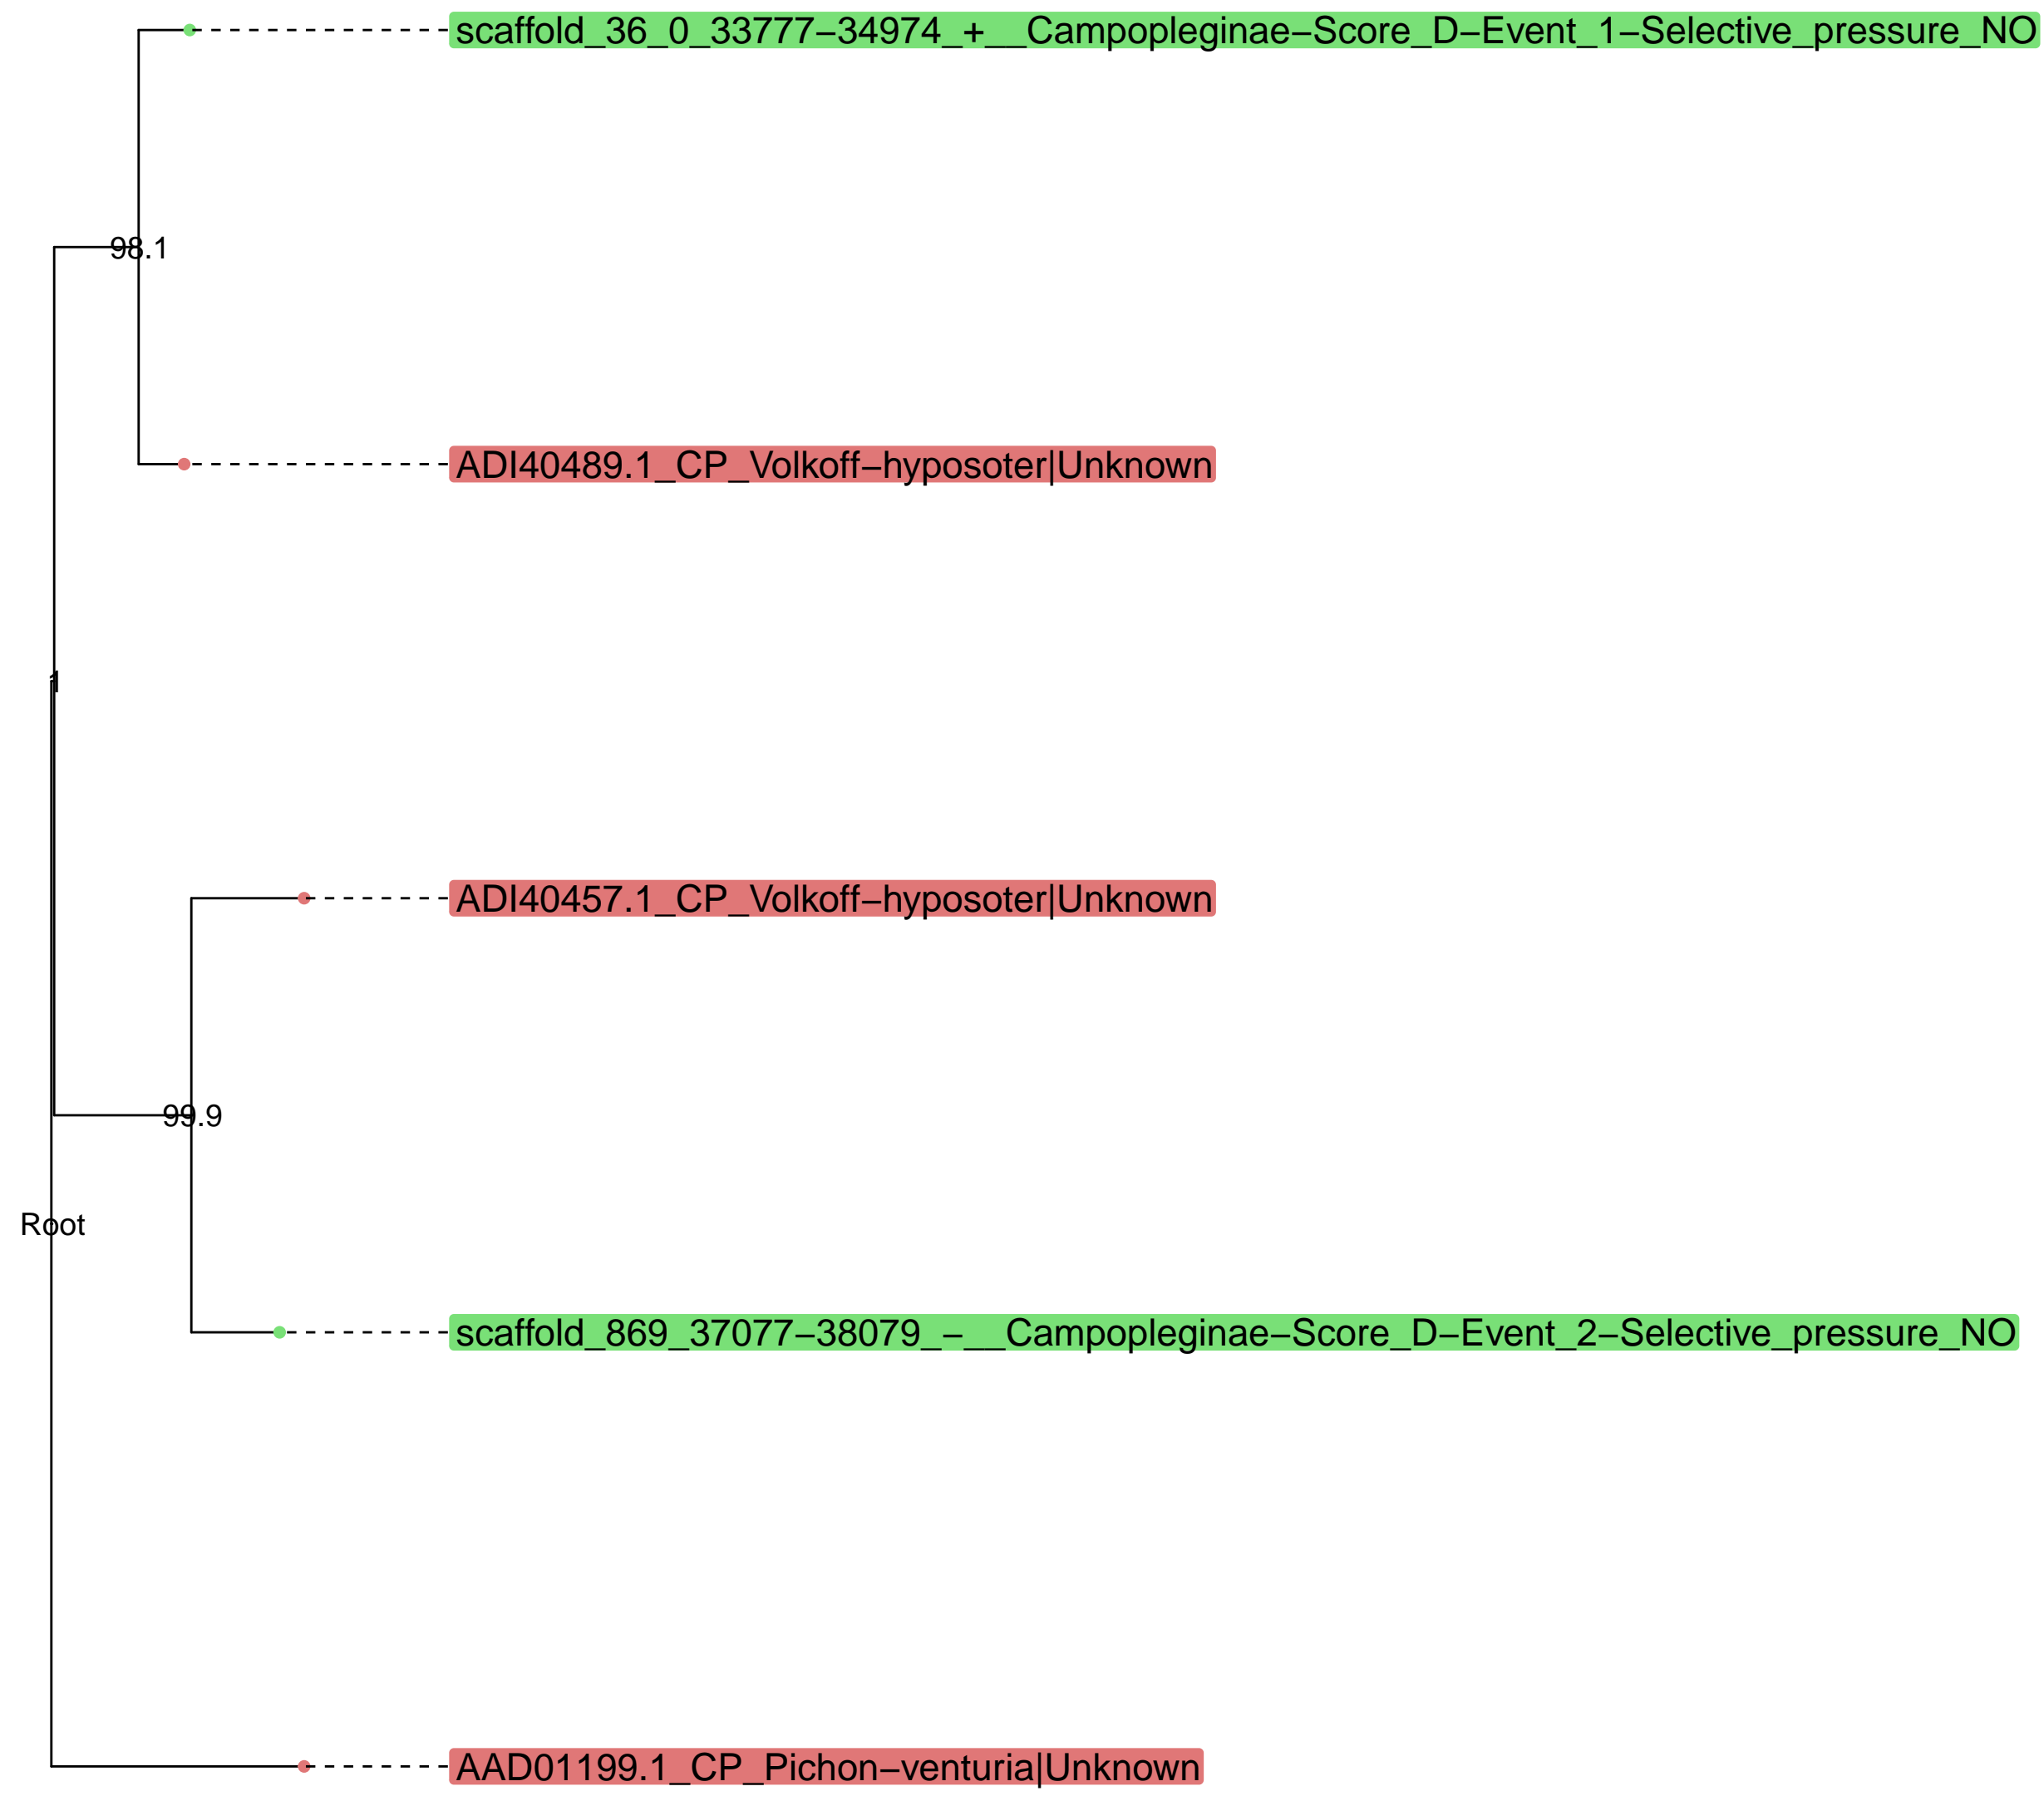

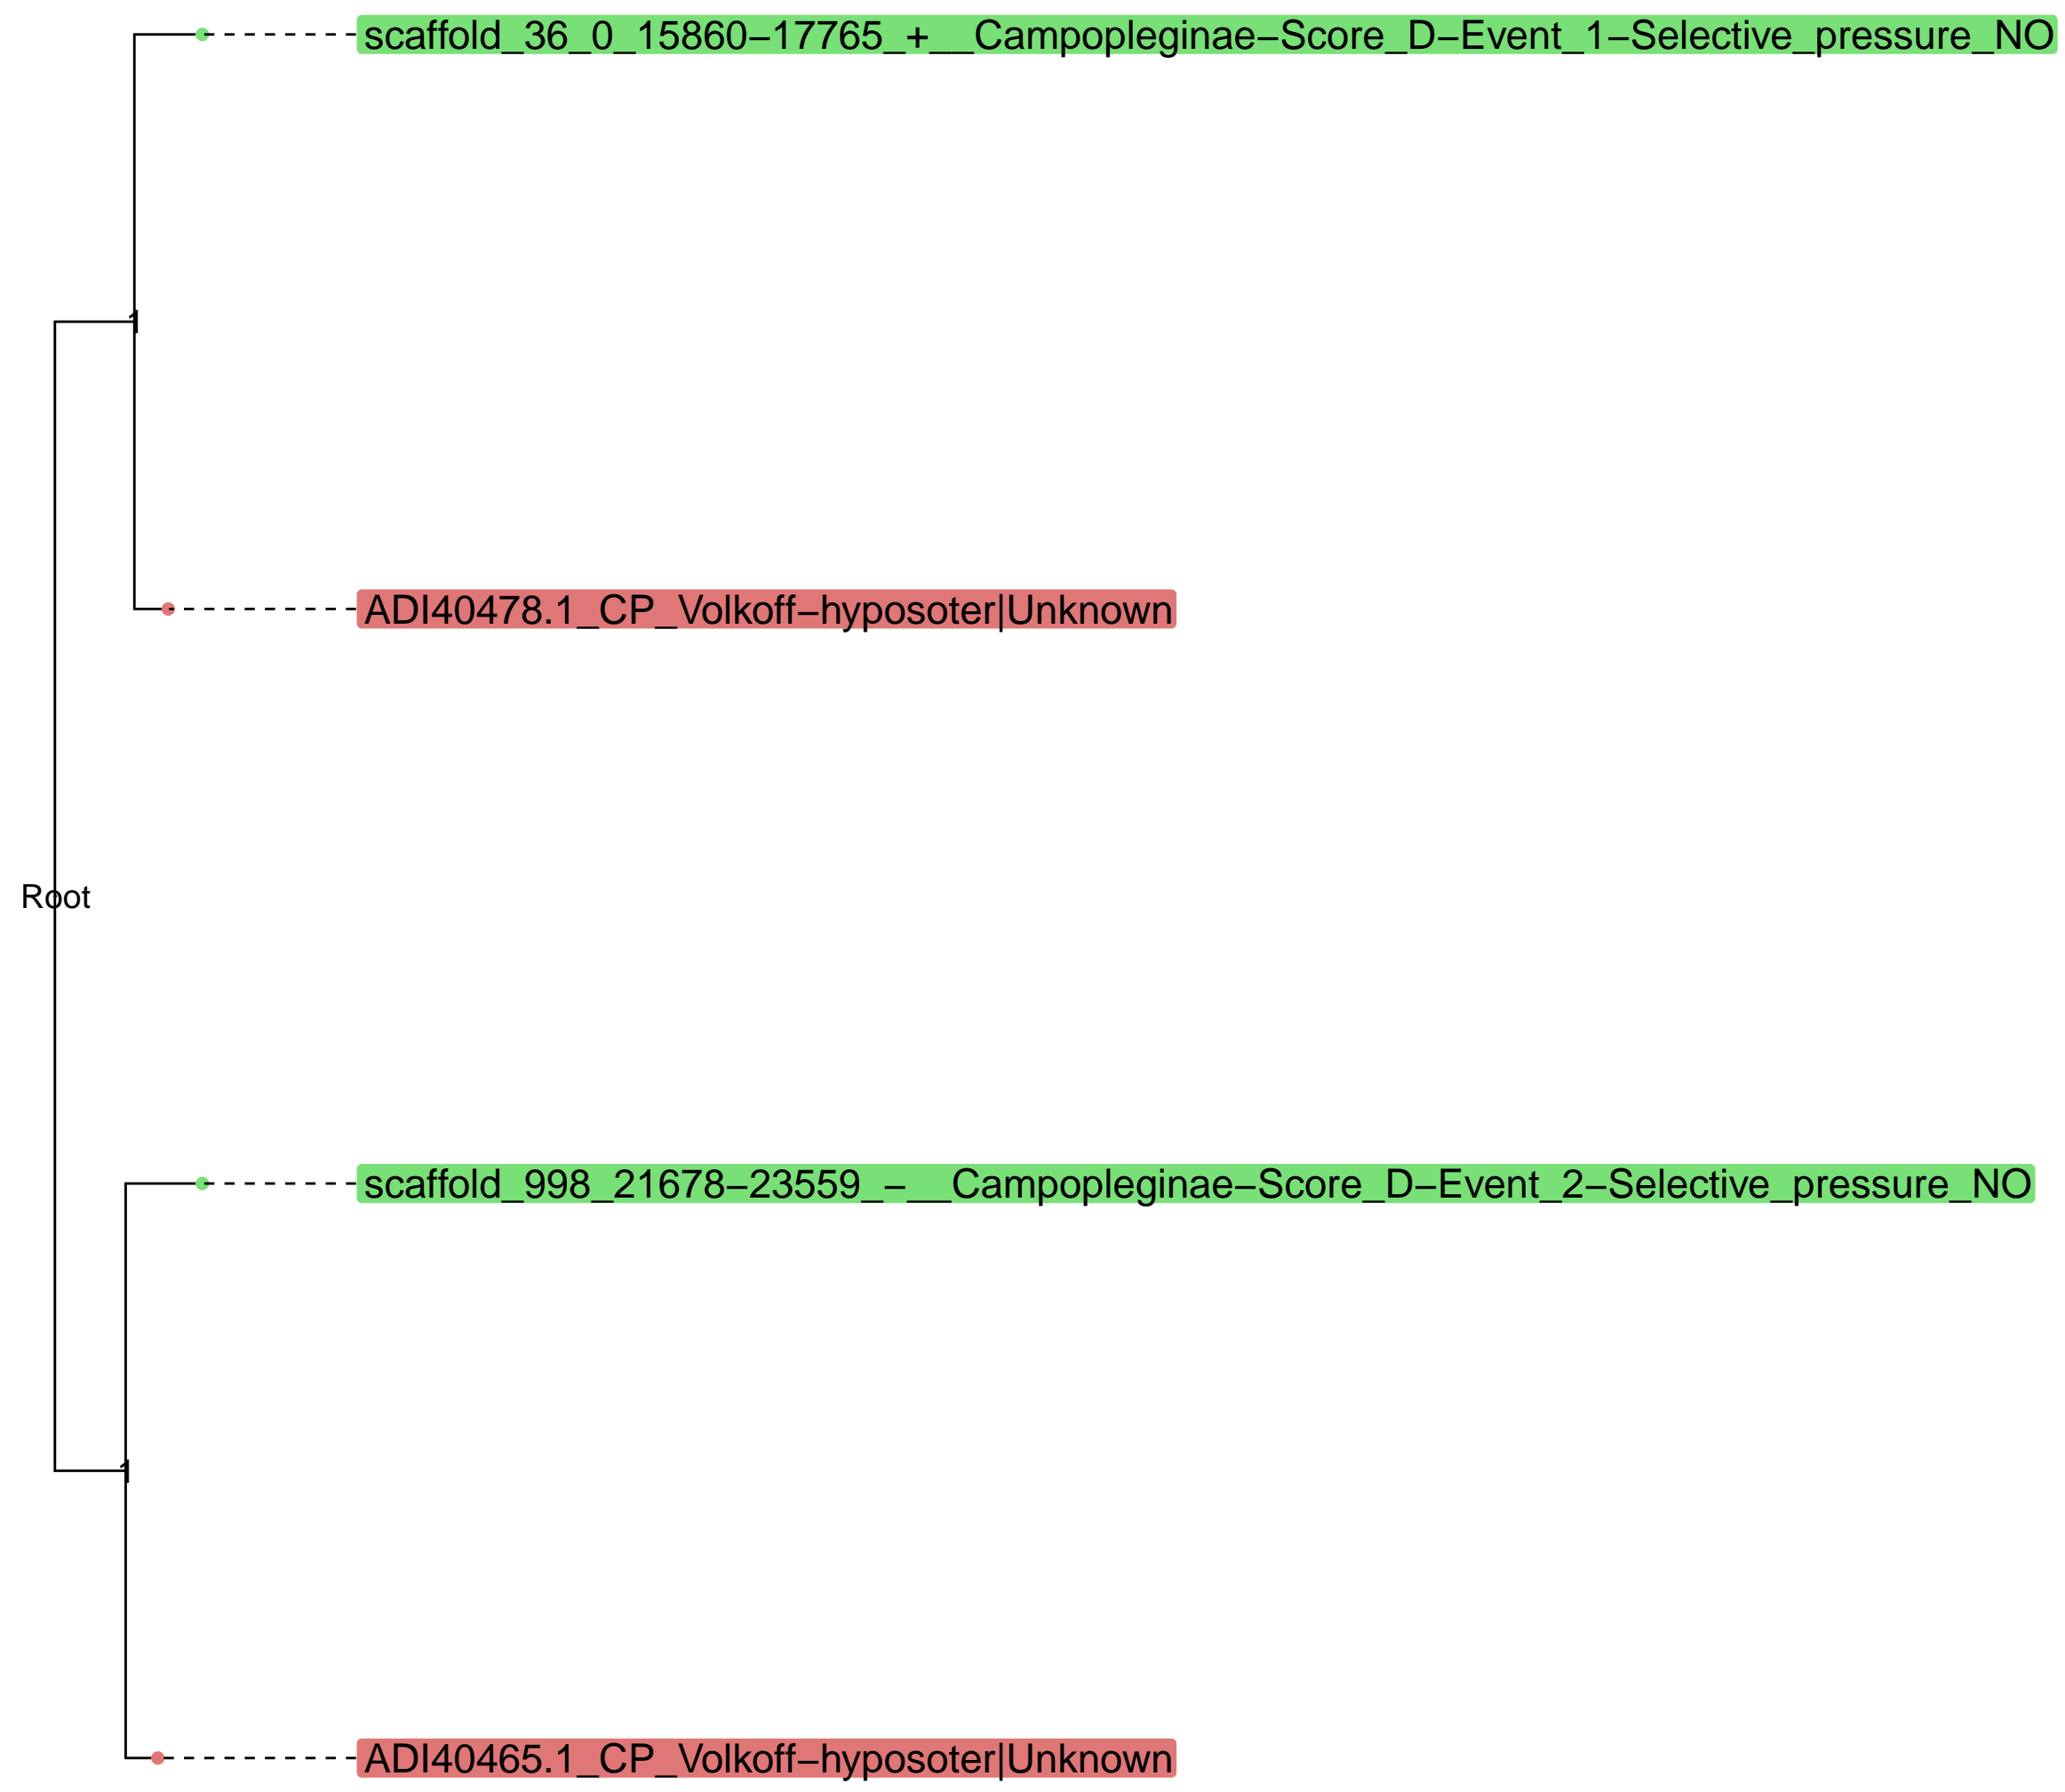

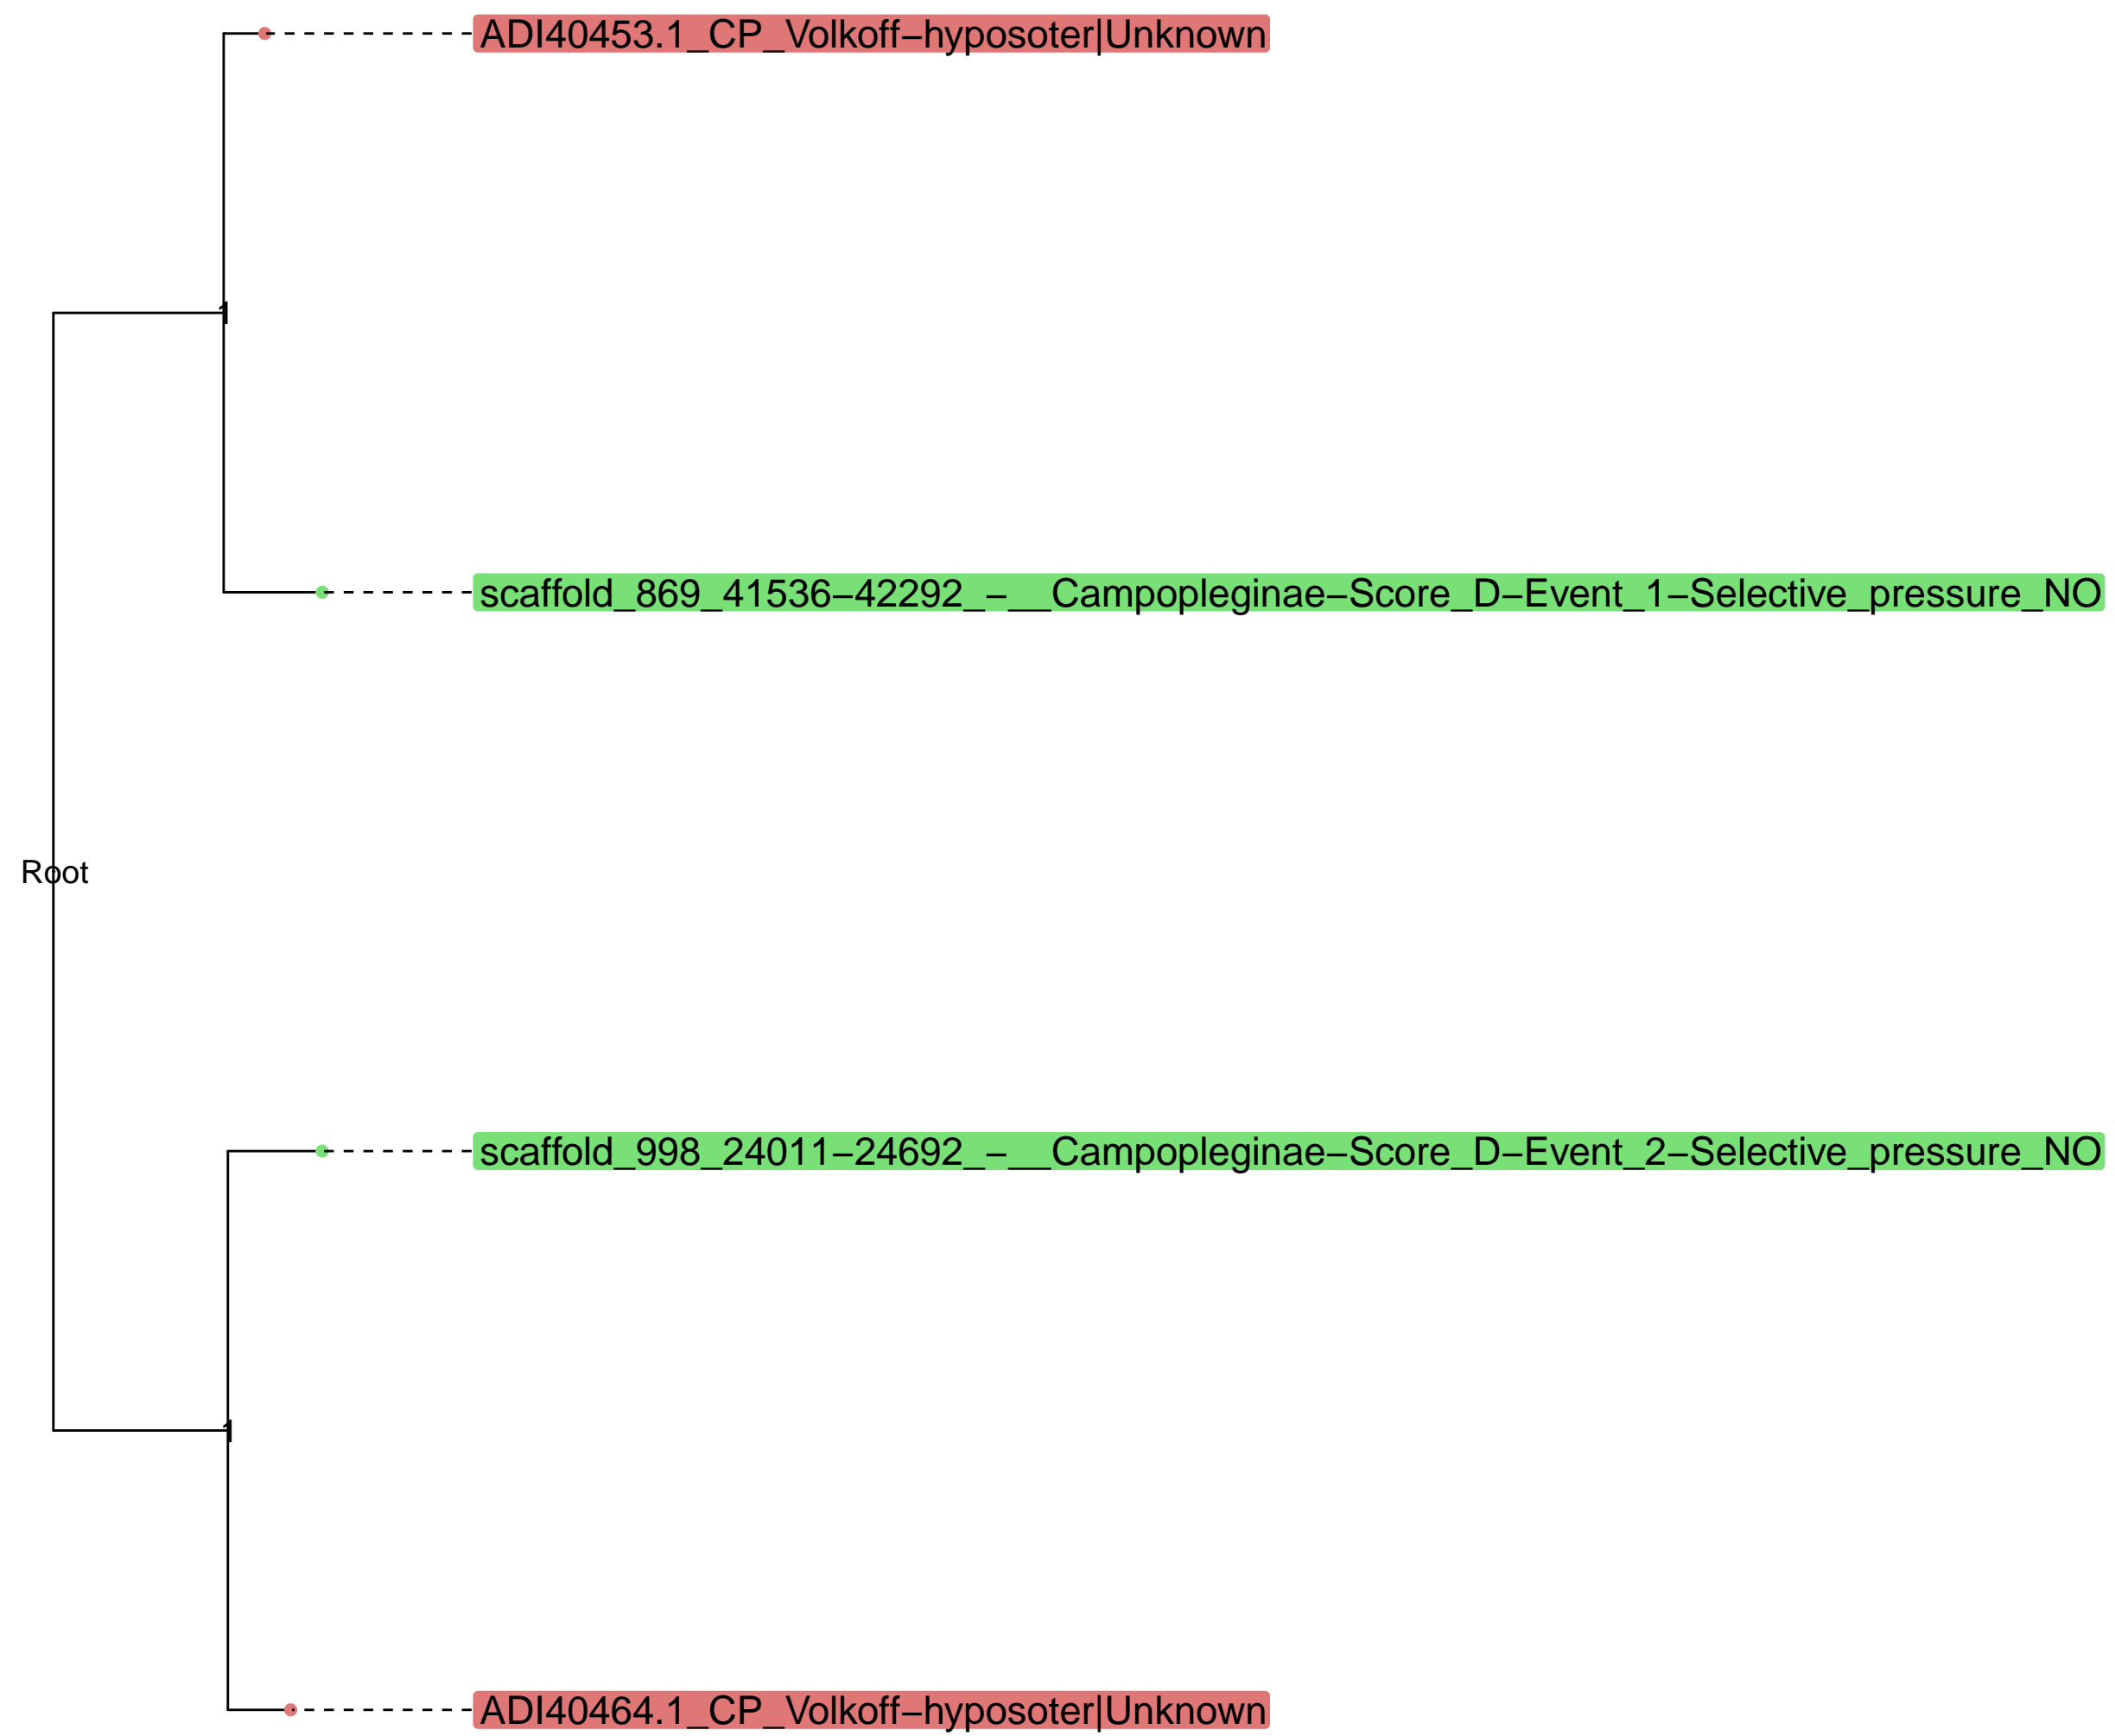

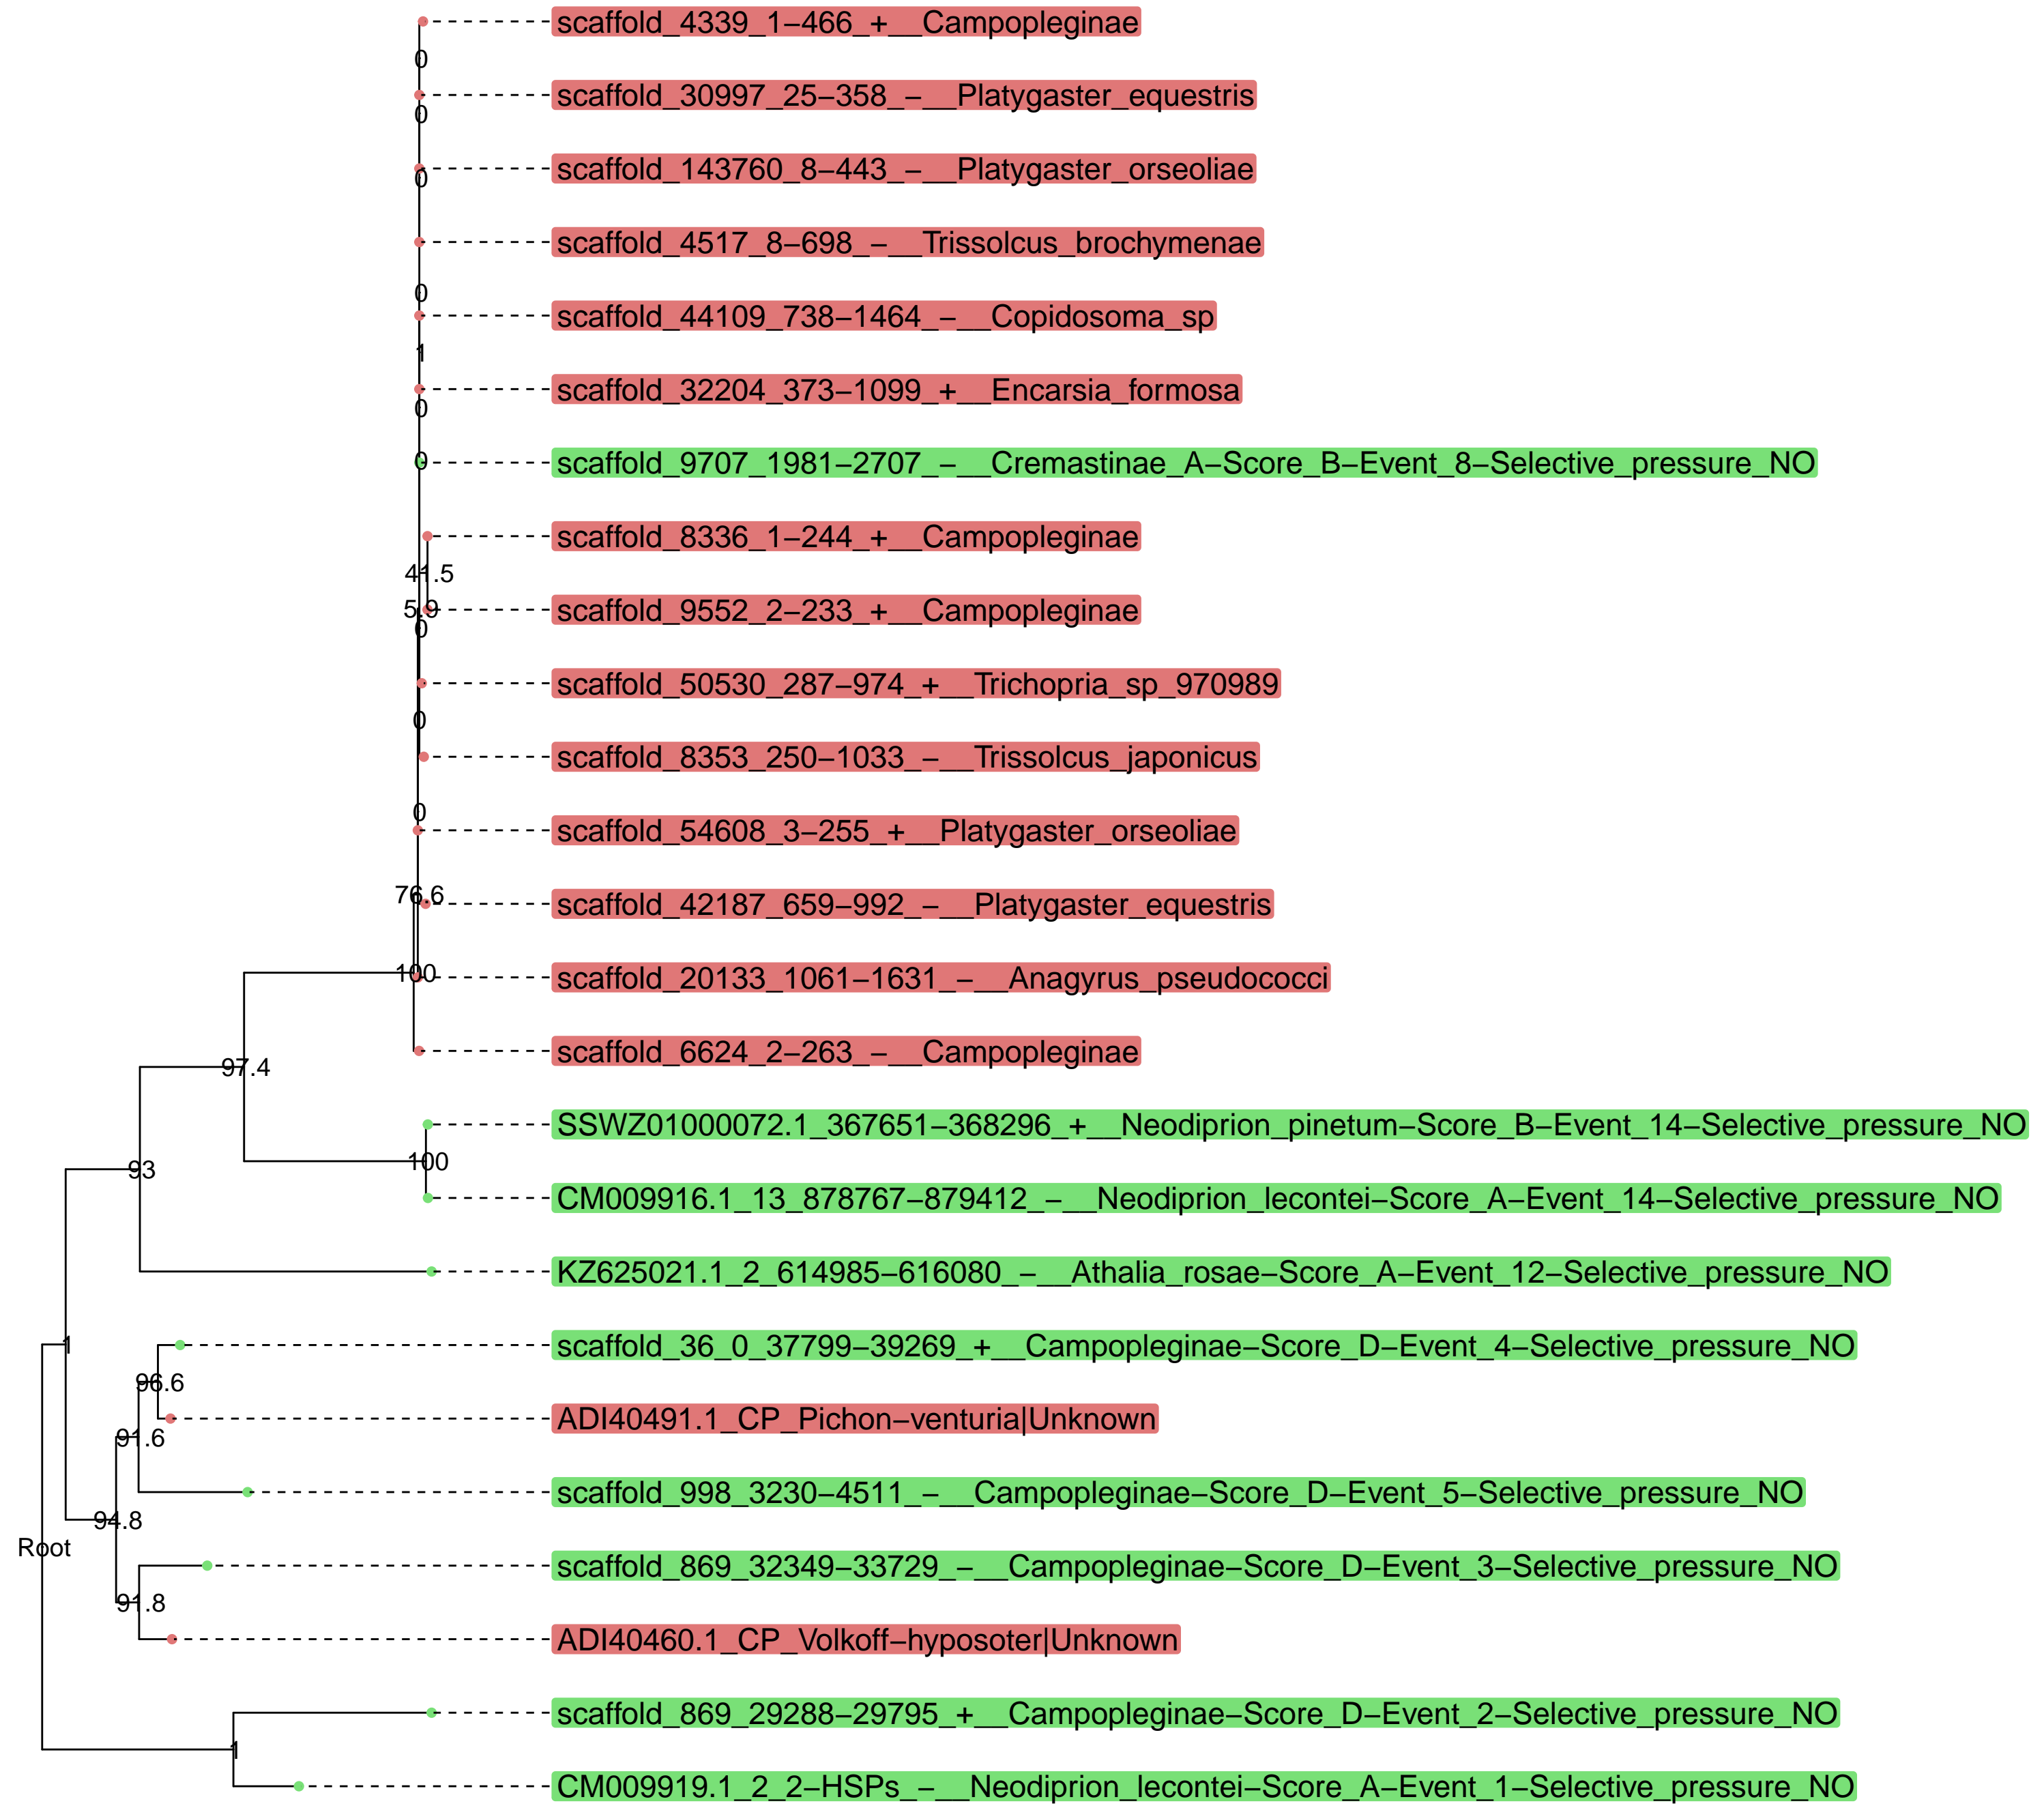



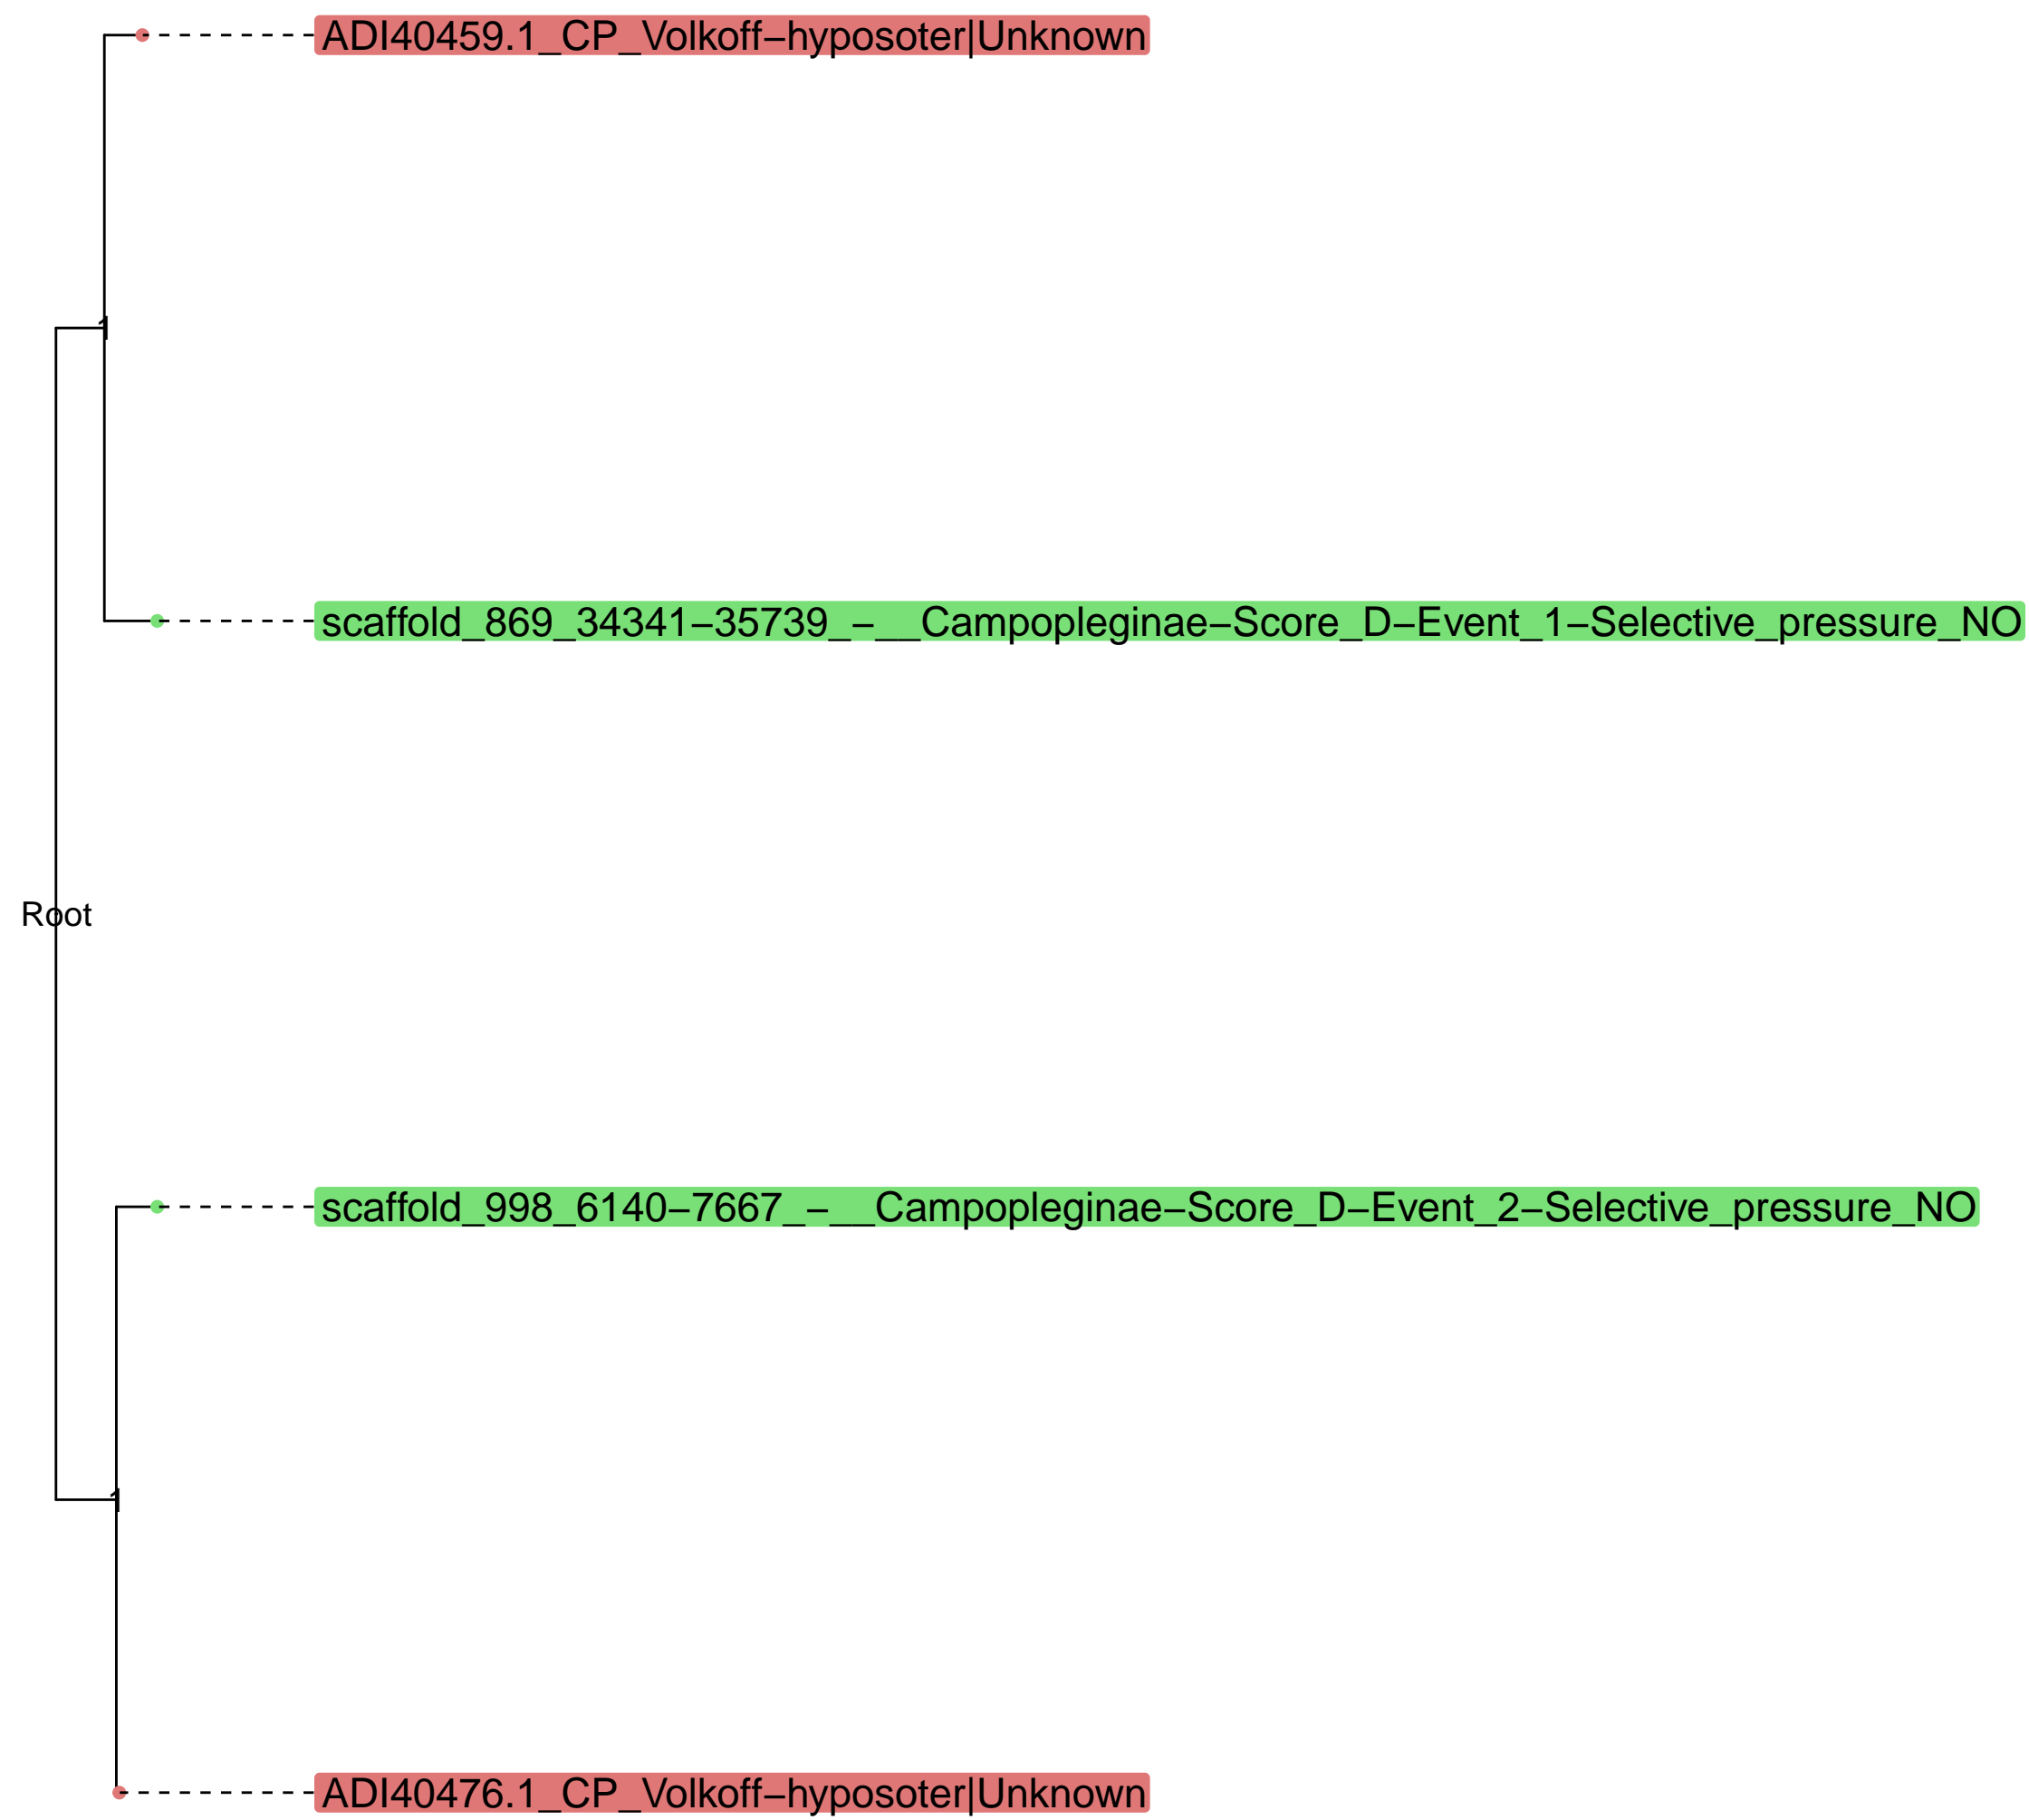

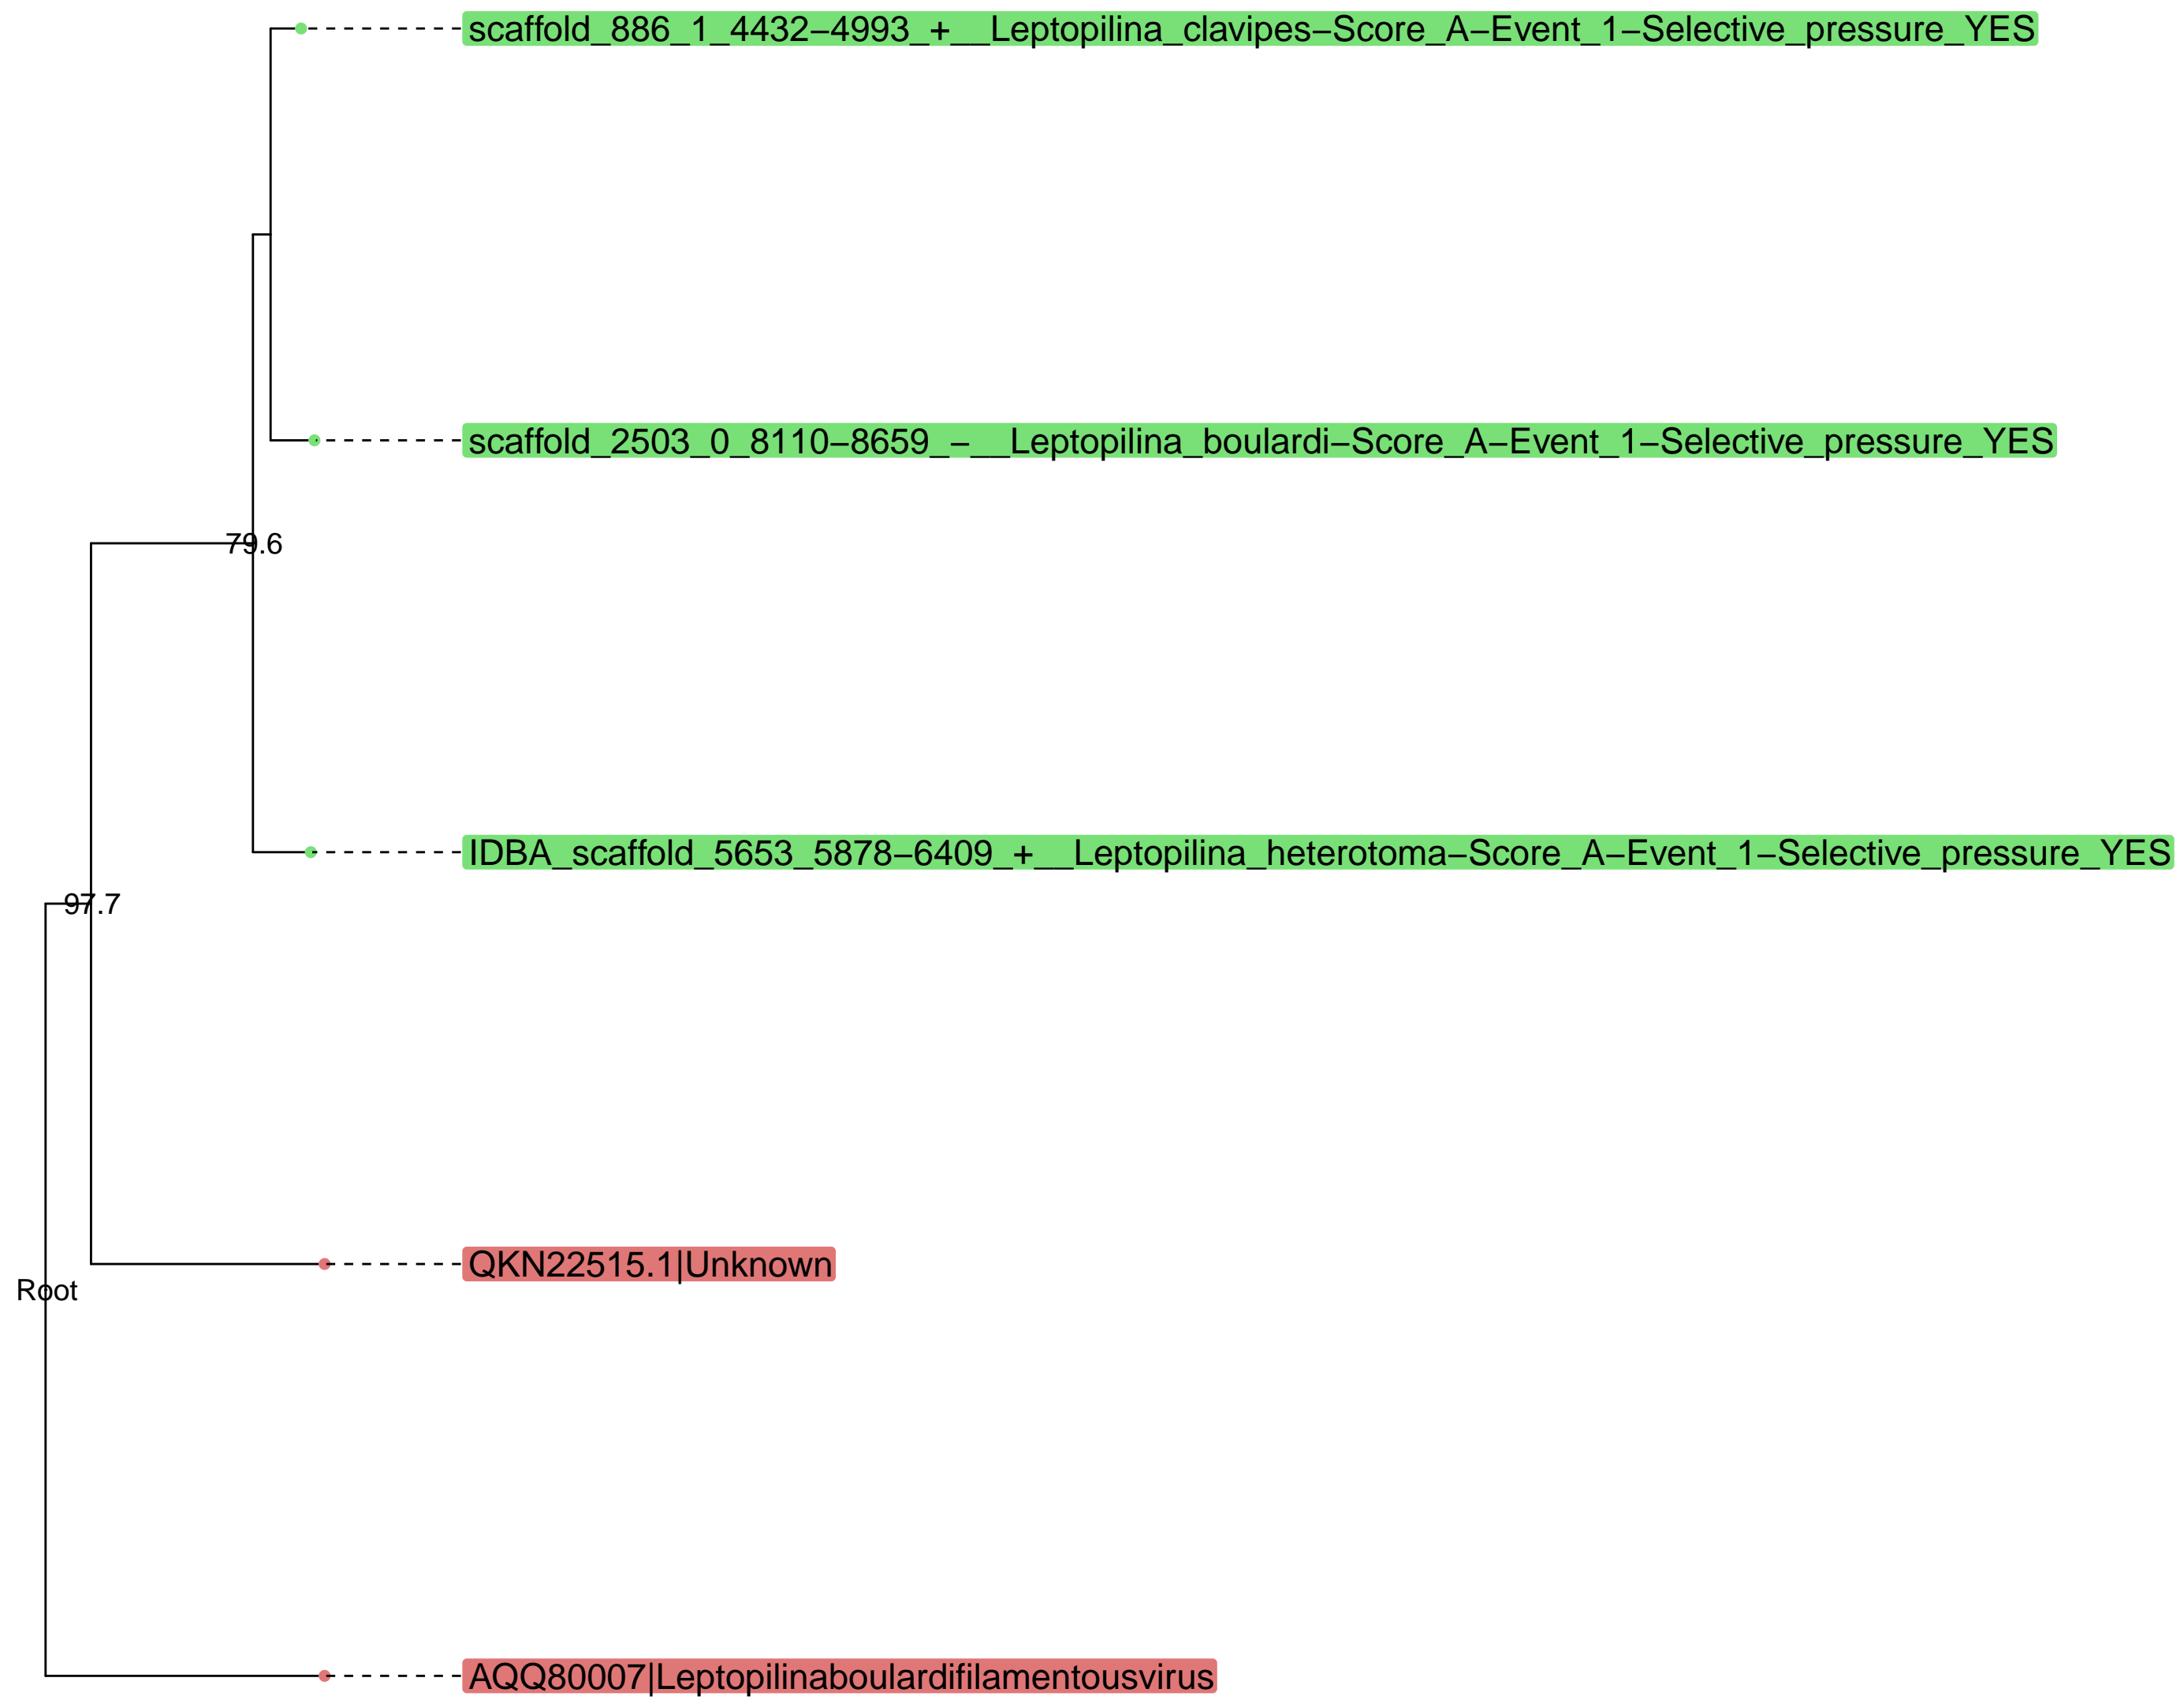

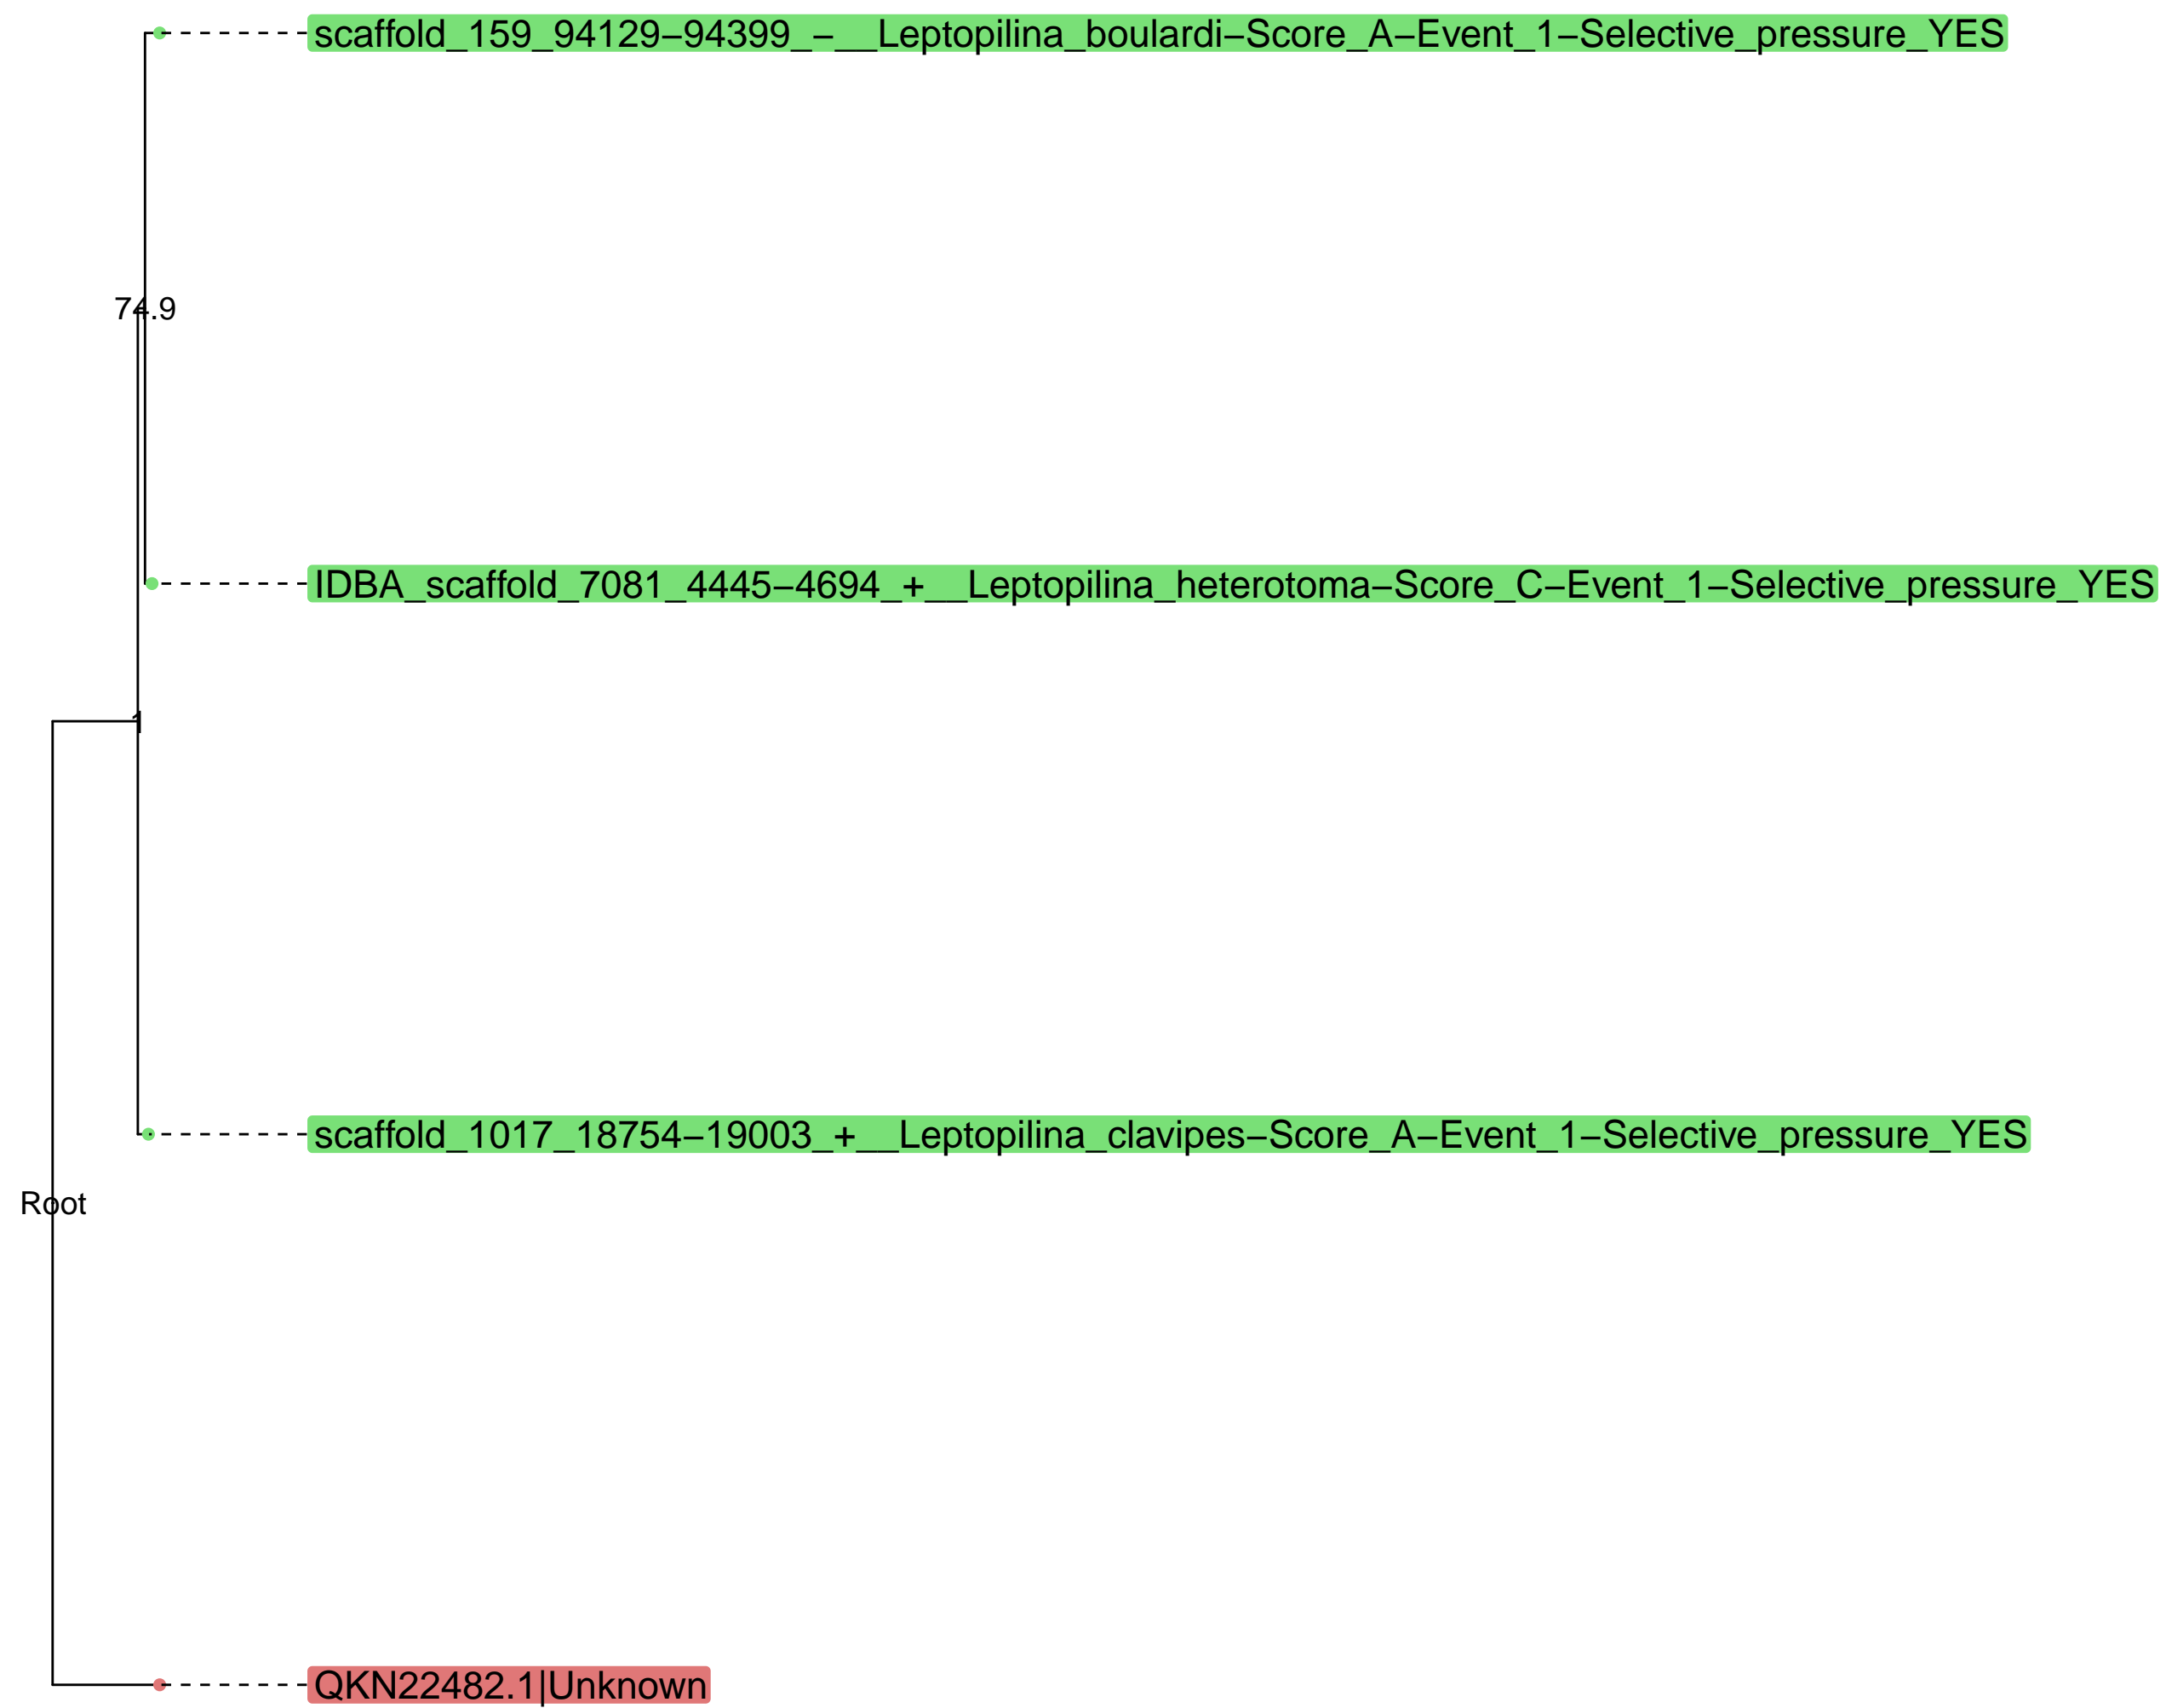

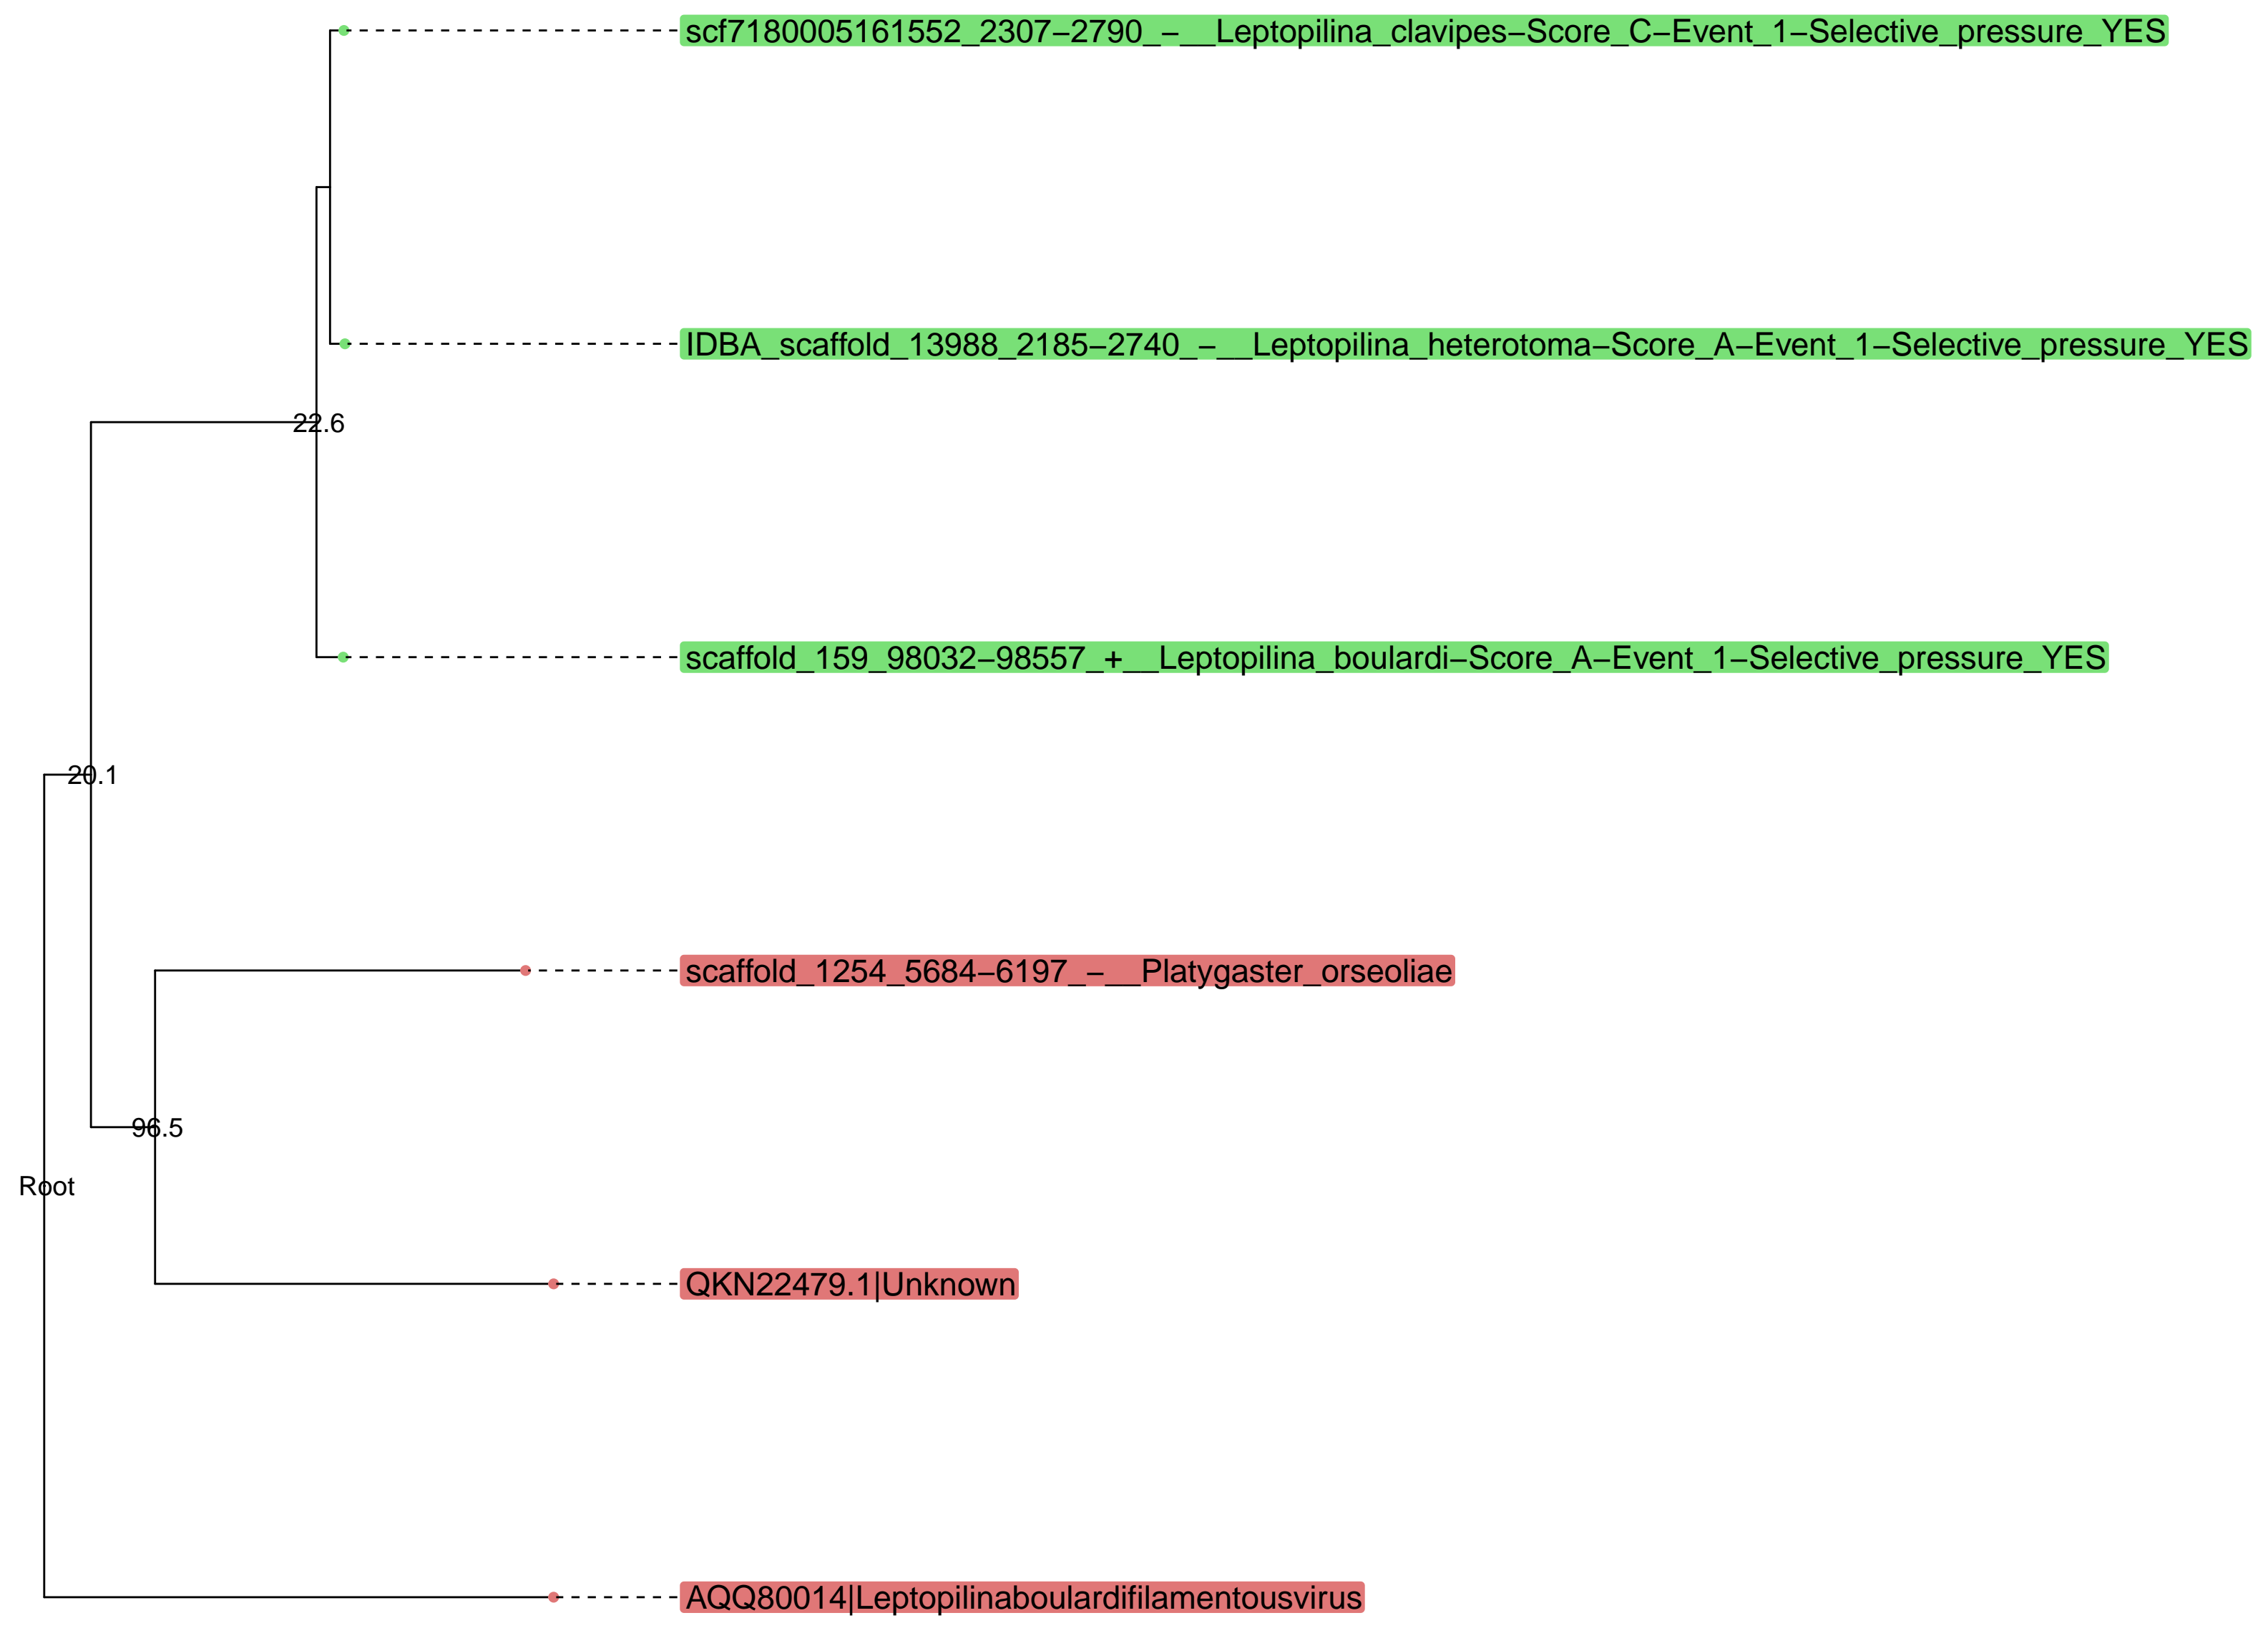

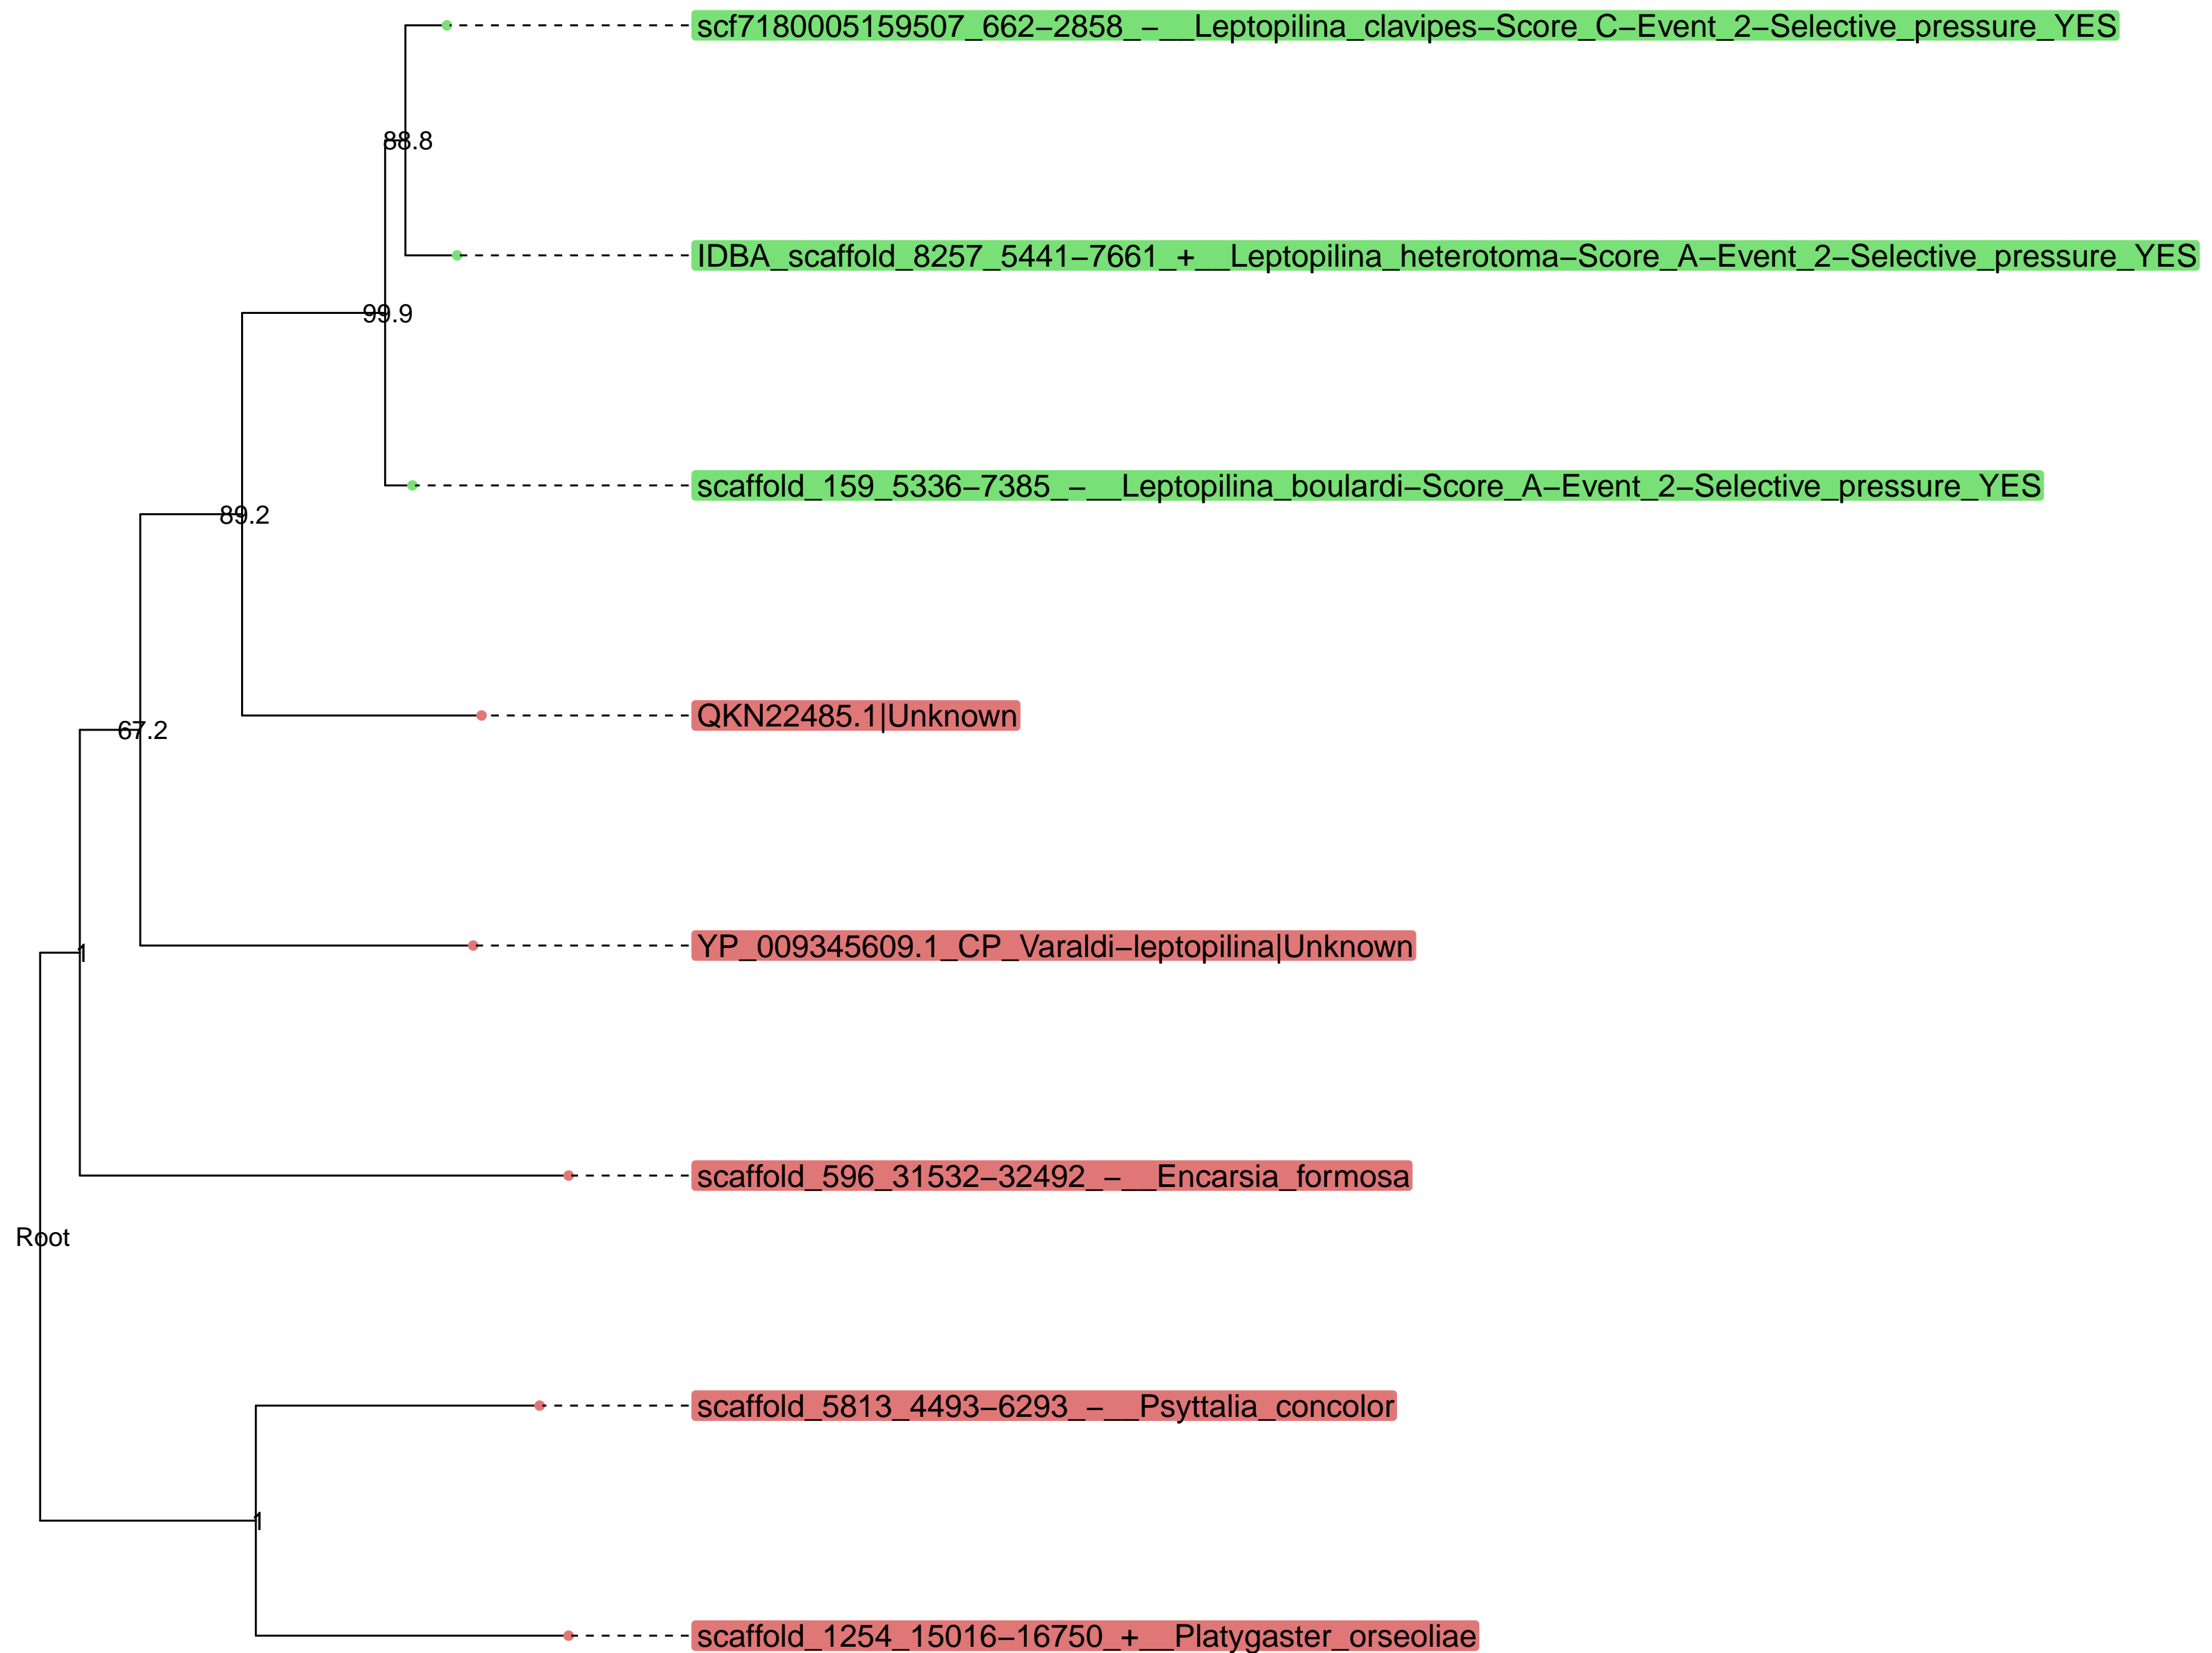

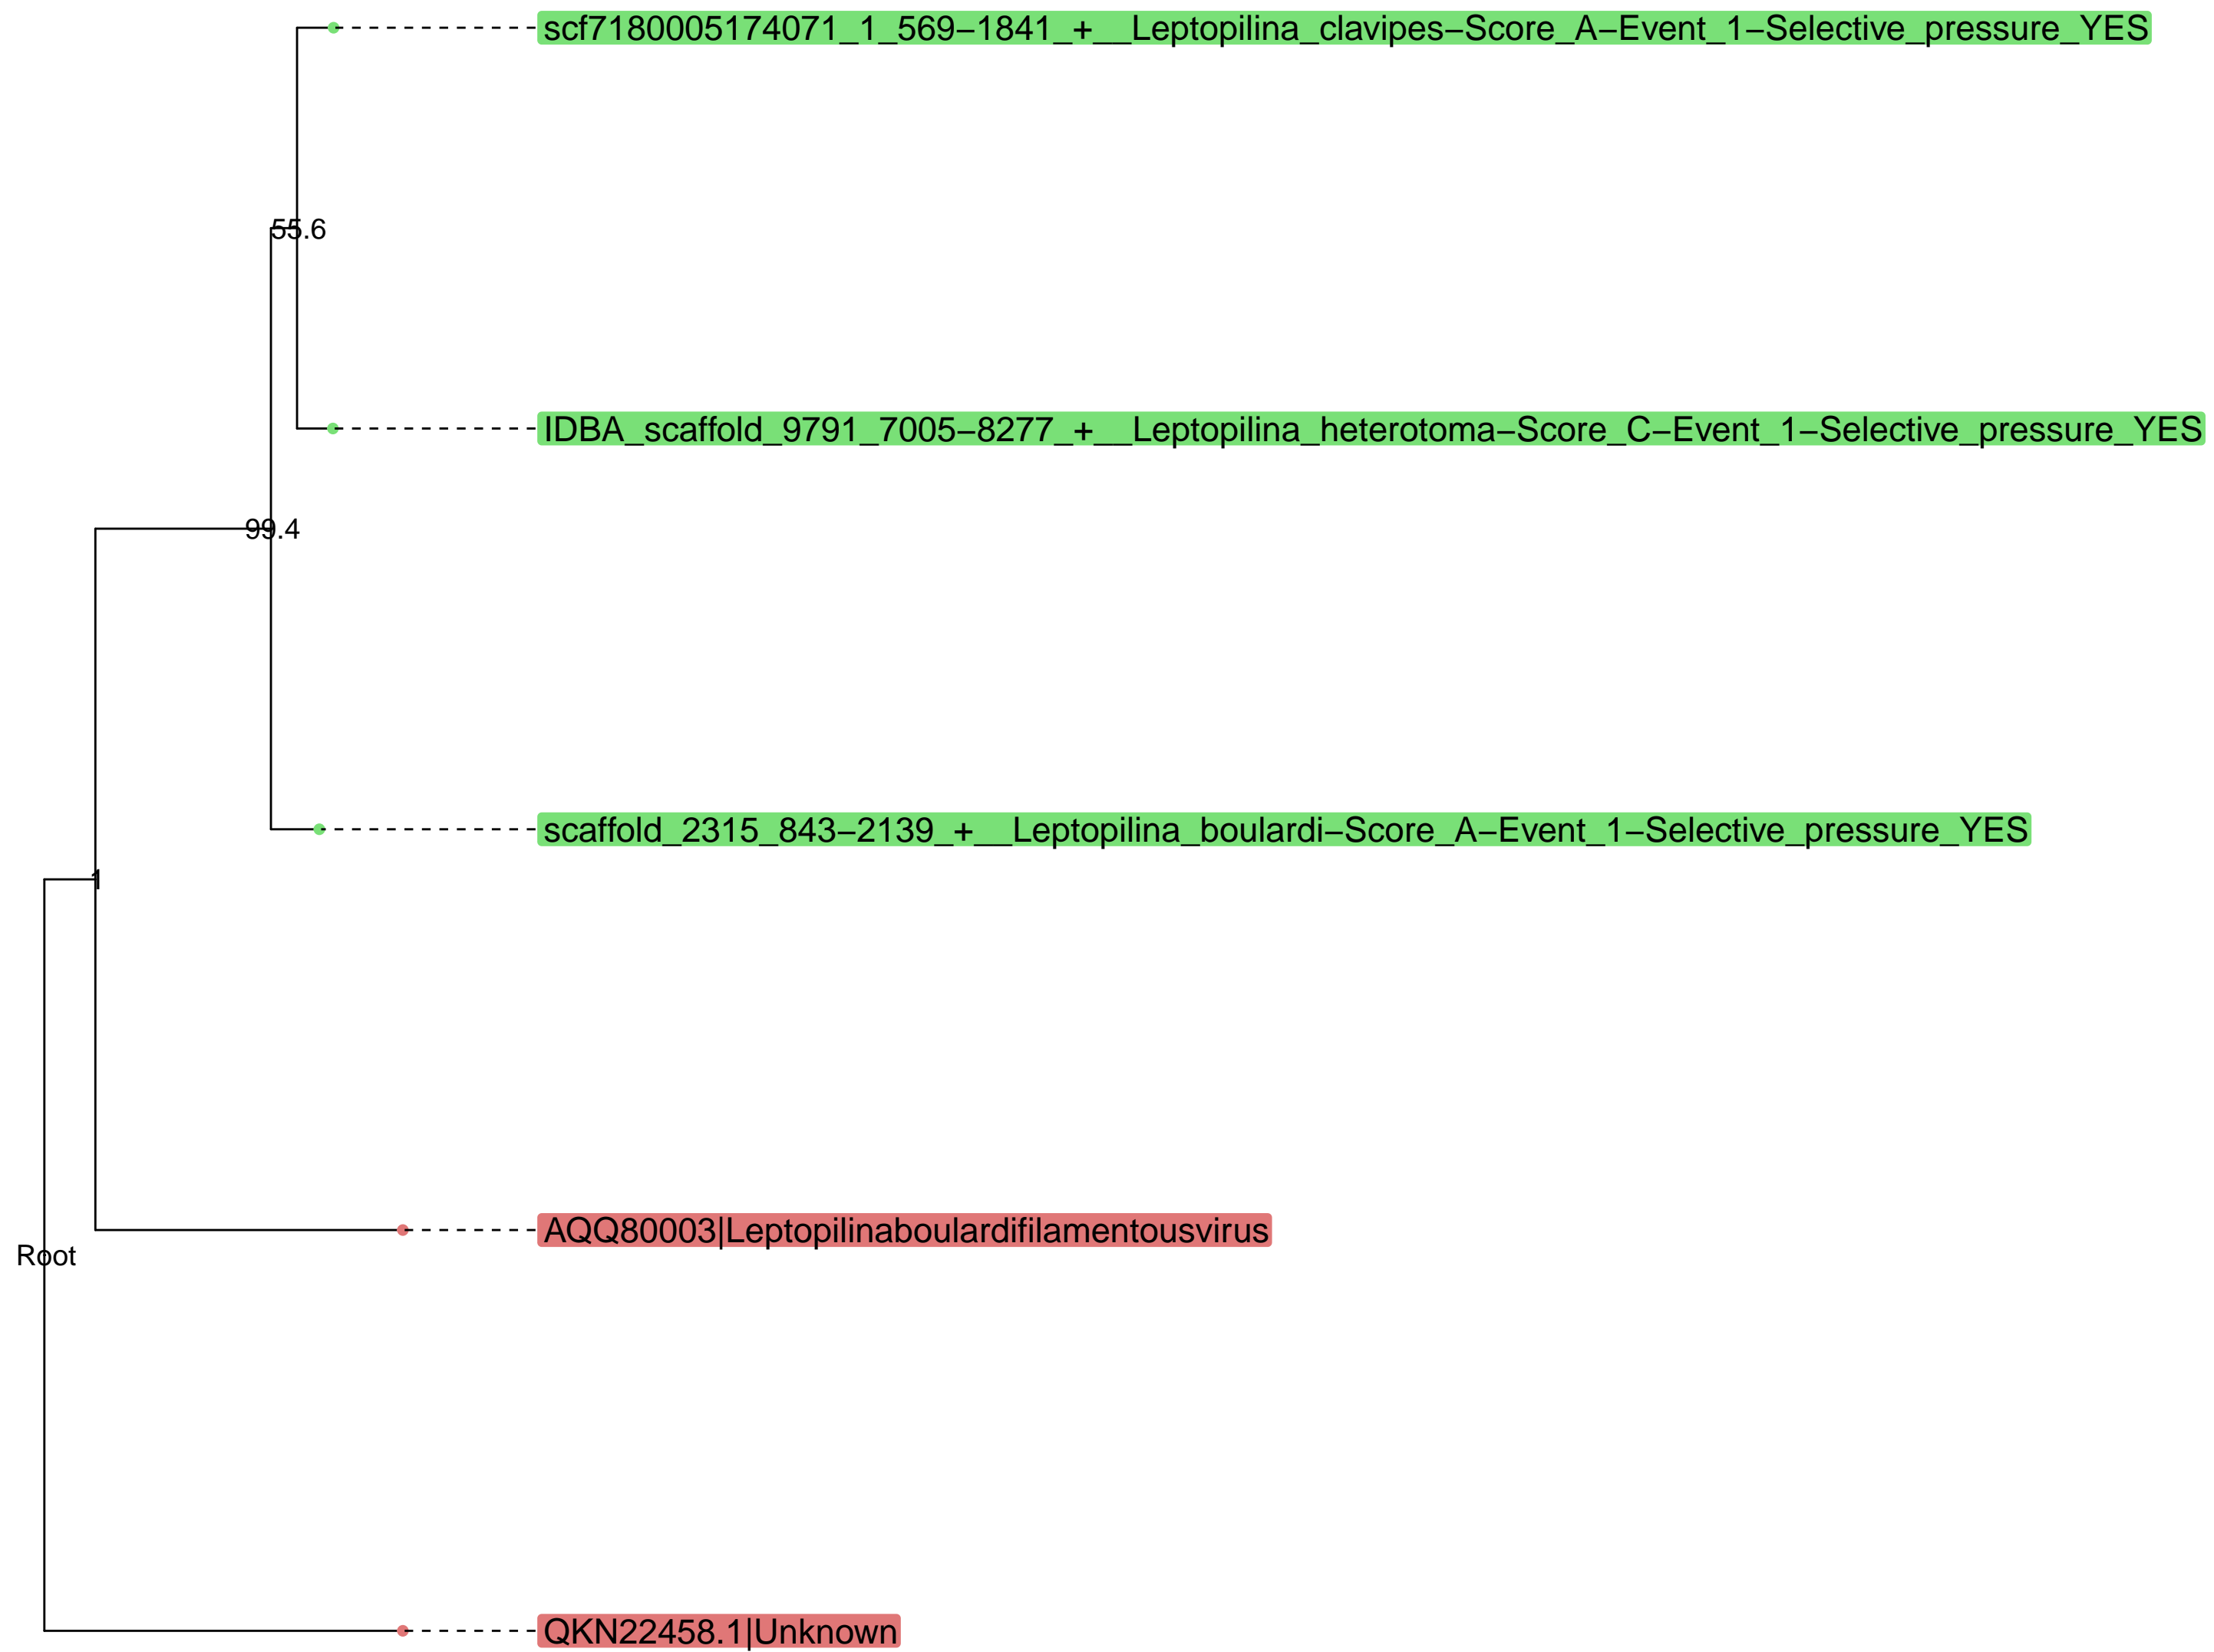

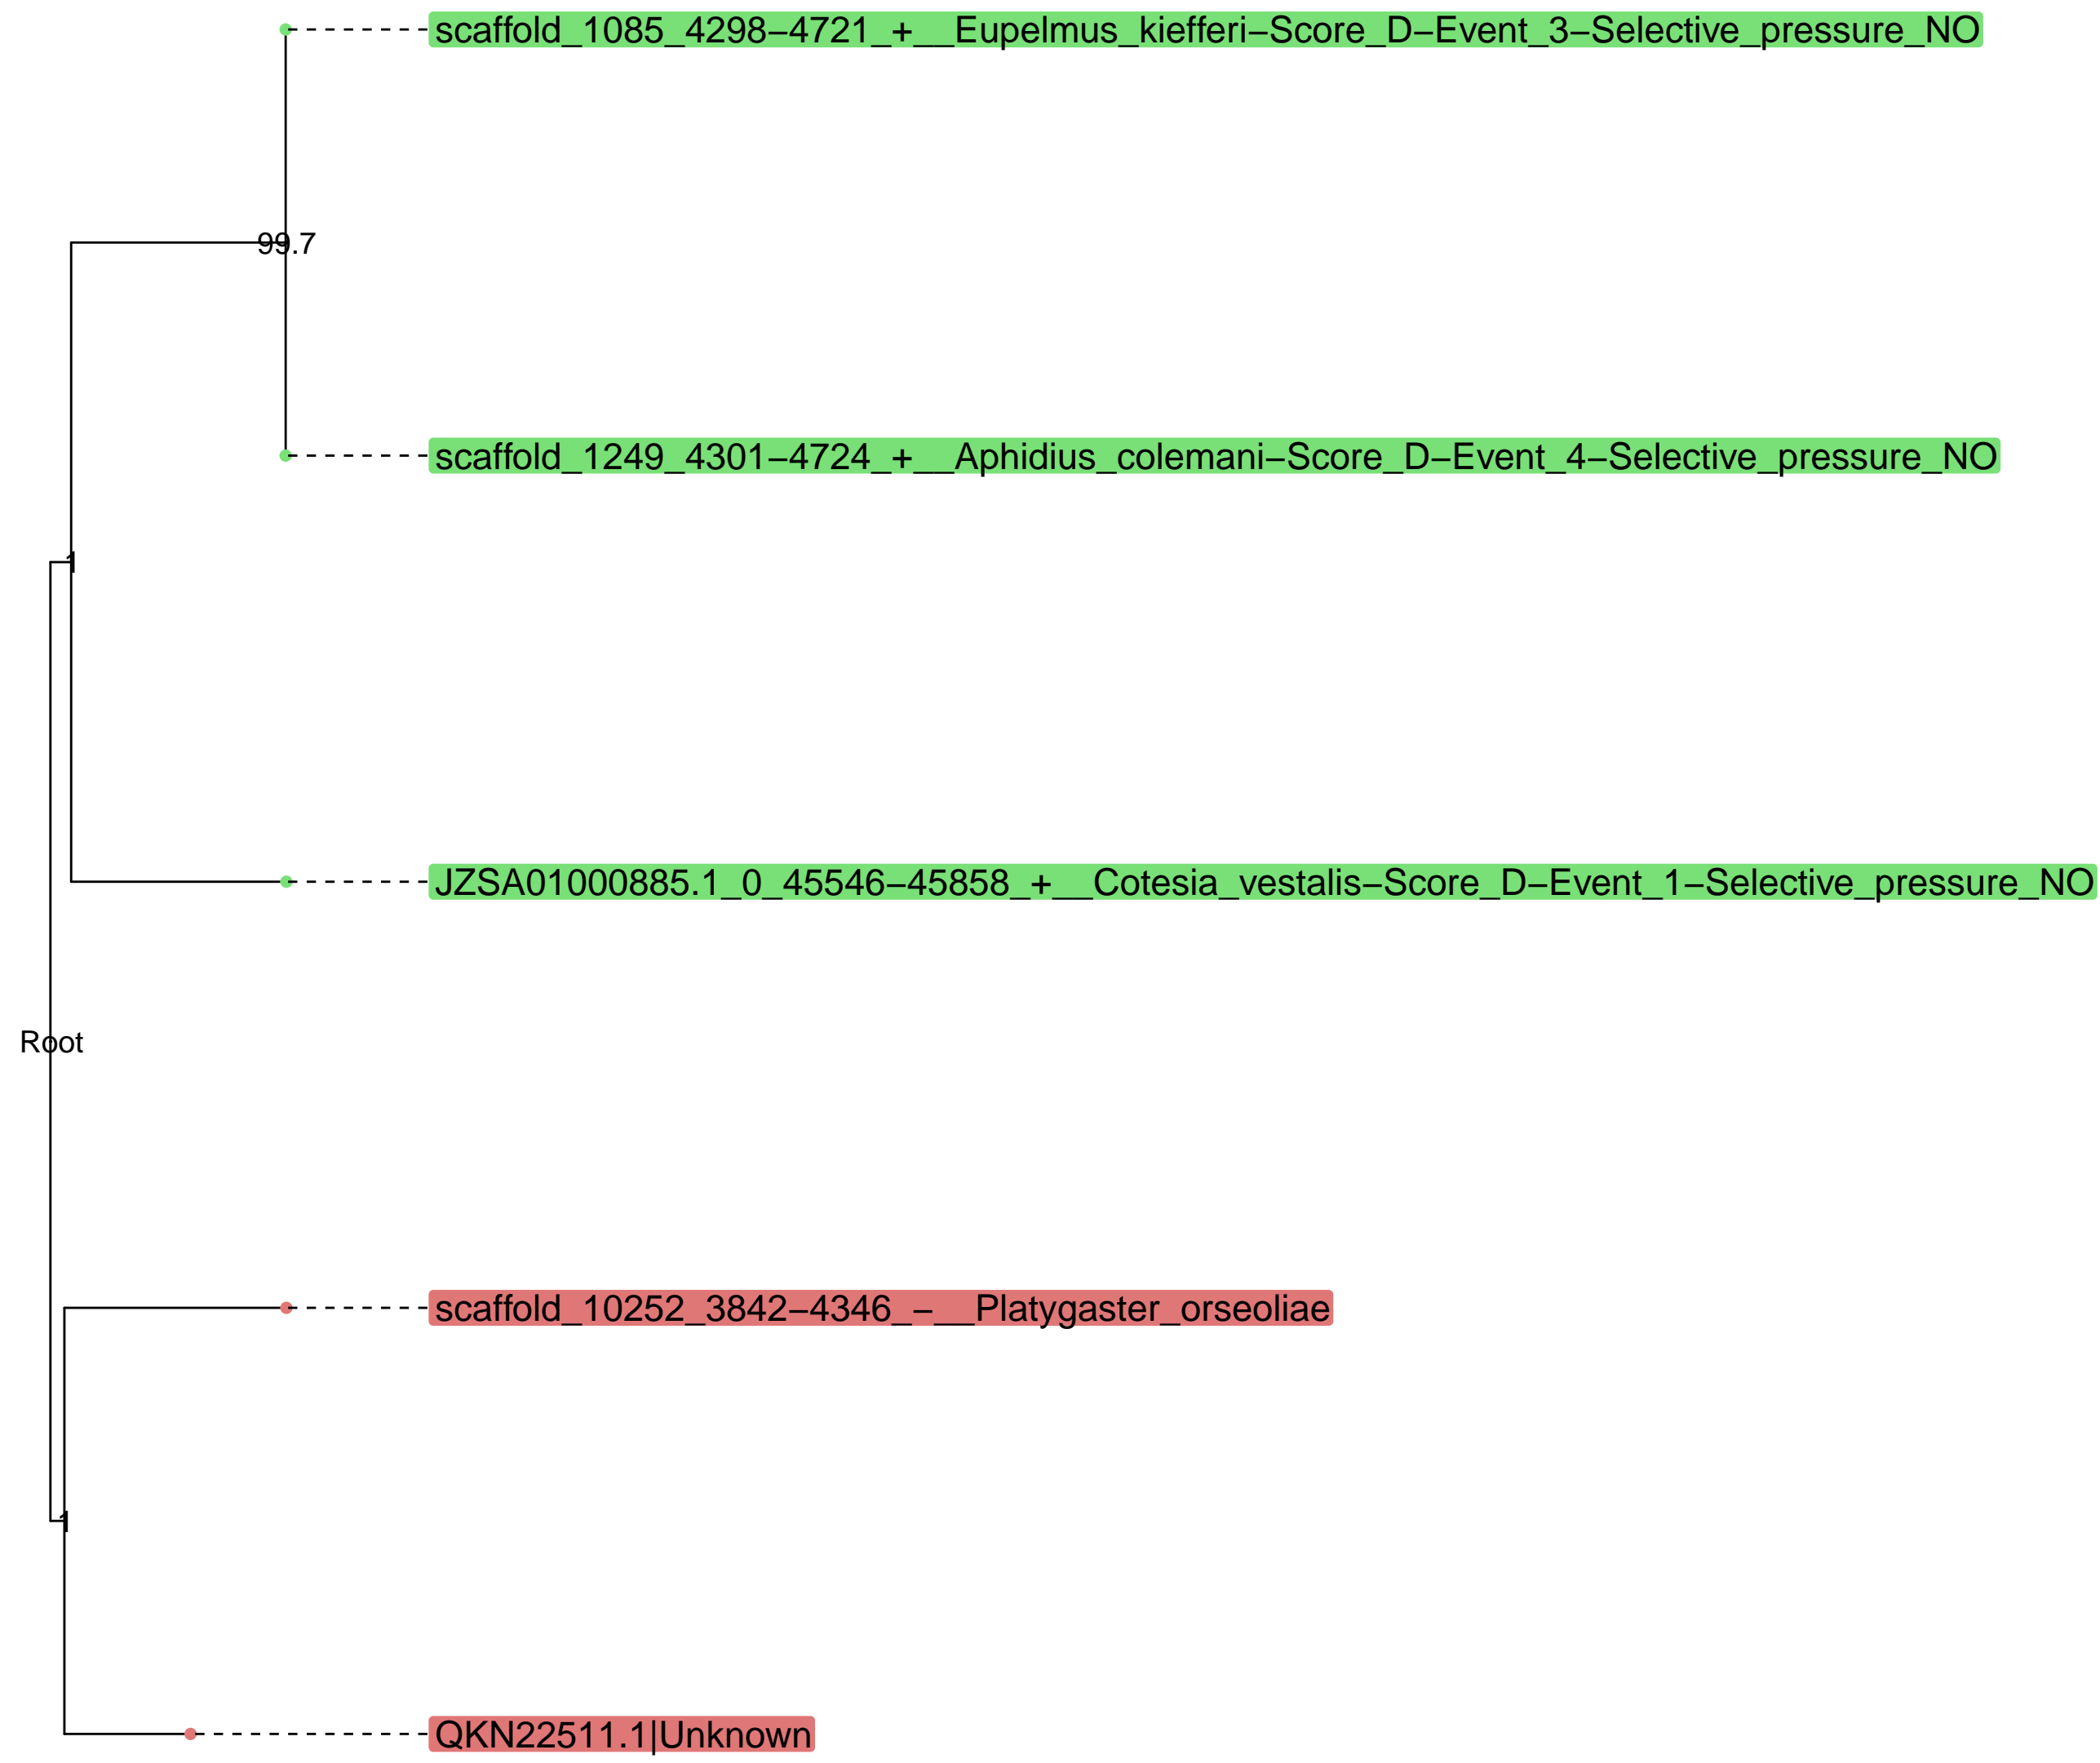

Cluster26024 – families involved : ['LbFV\_like'] – putative protein : ['Hepatocyte growth factor–regulated tyrosine kinase substrate']

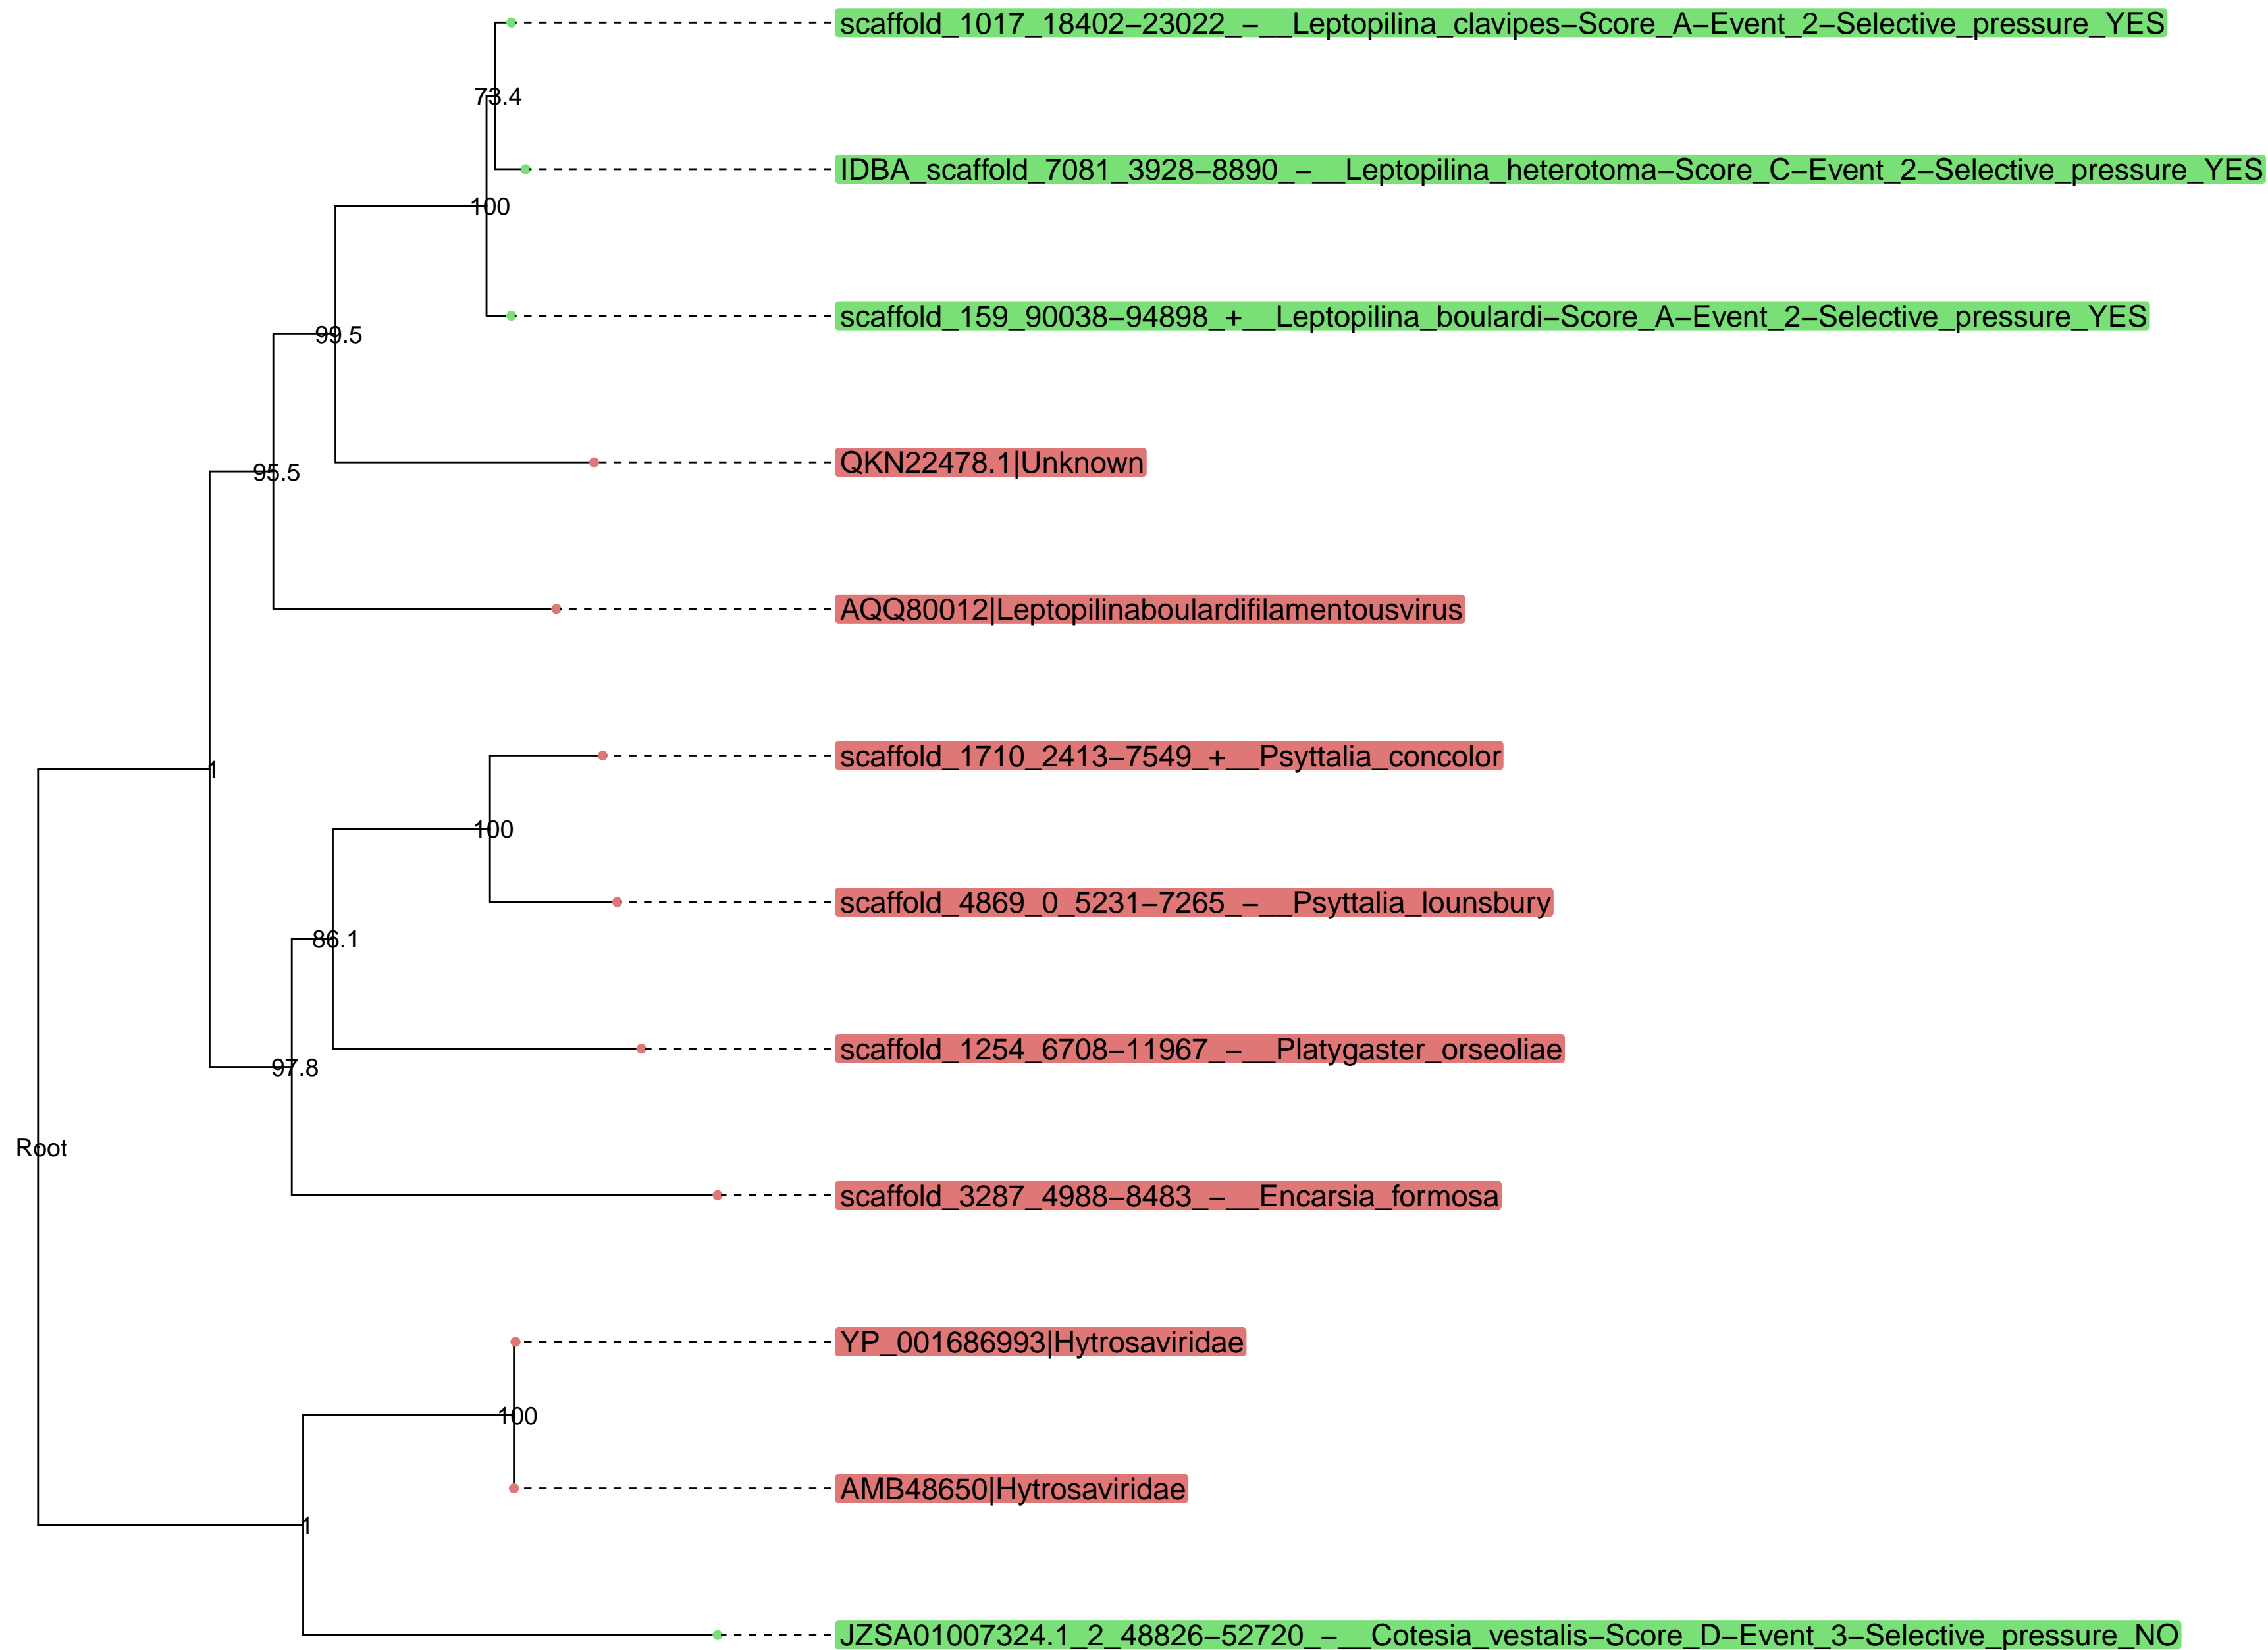



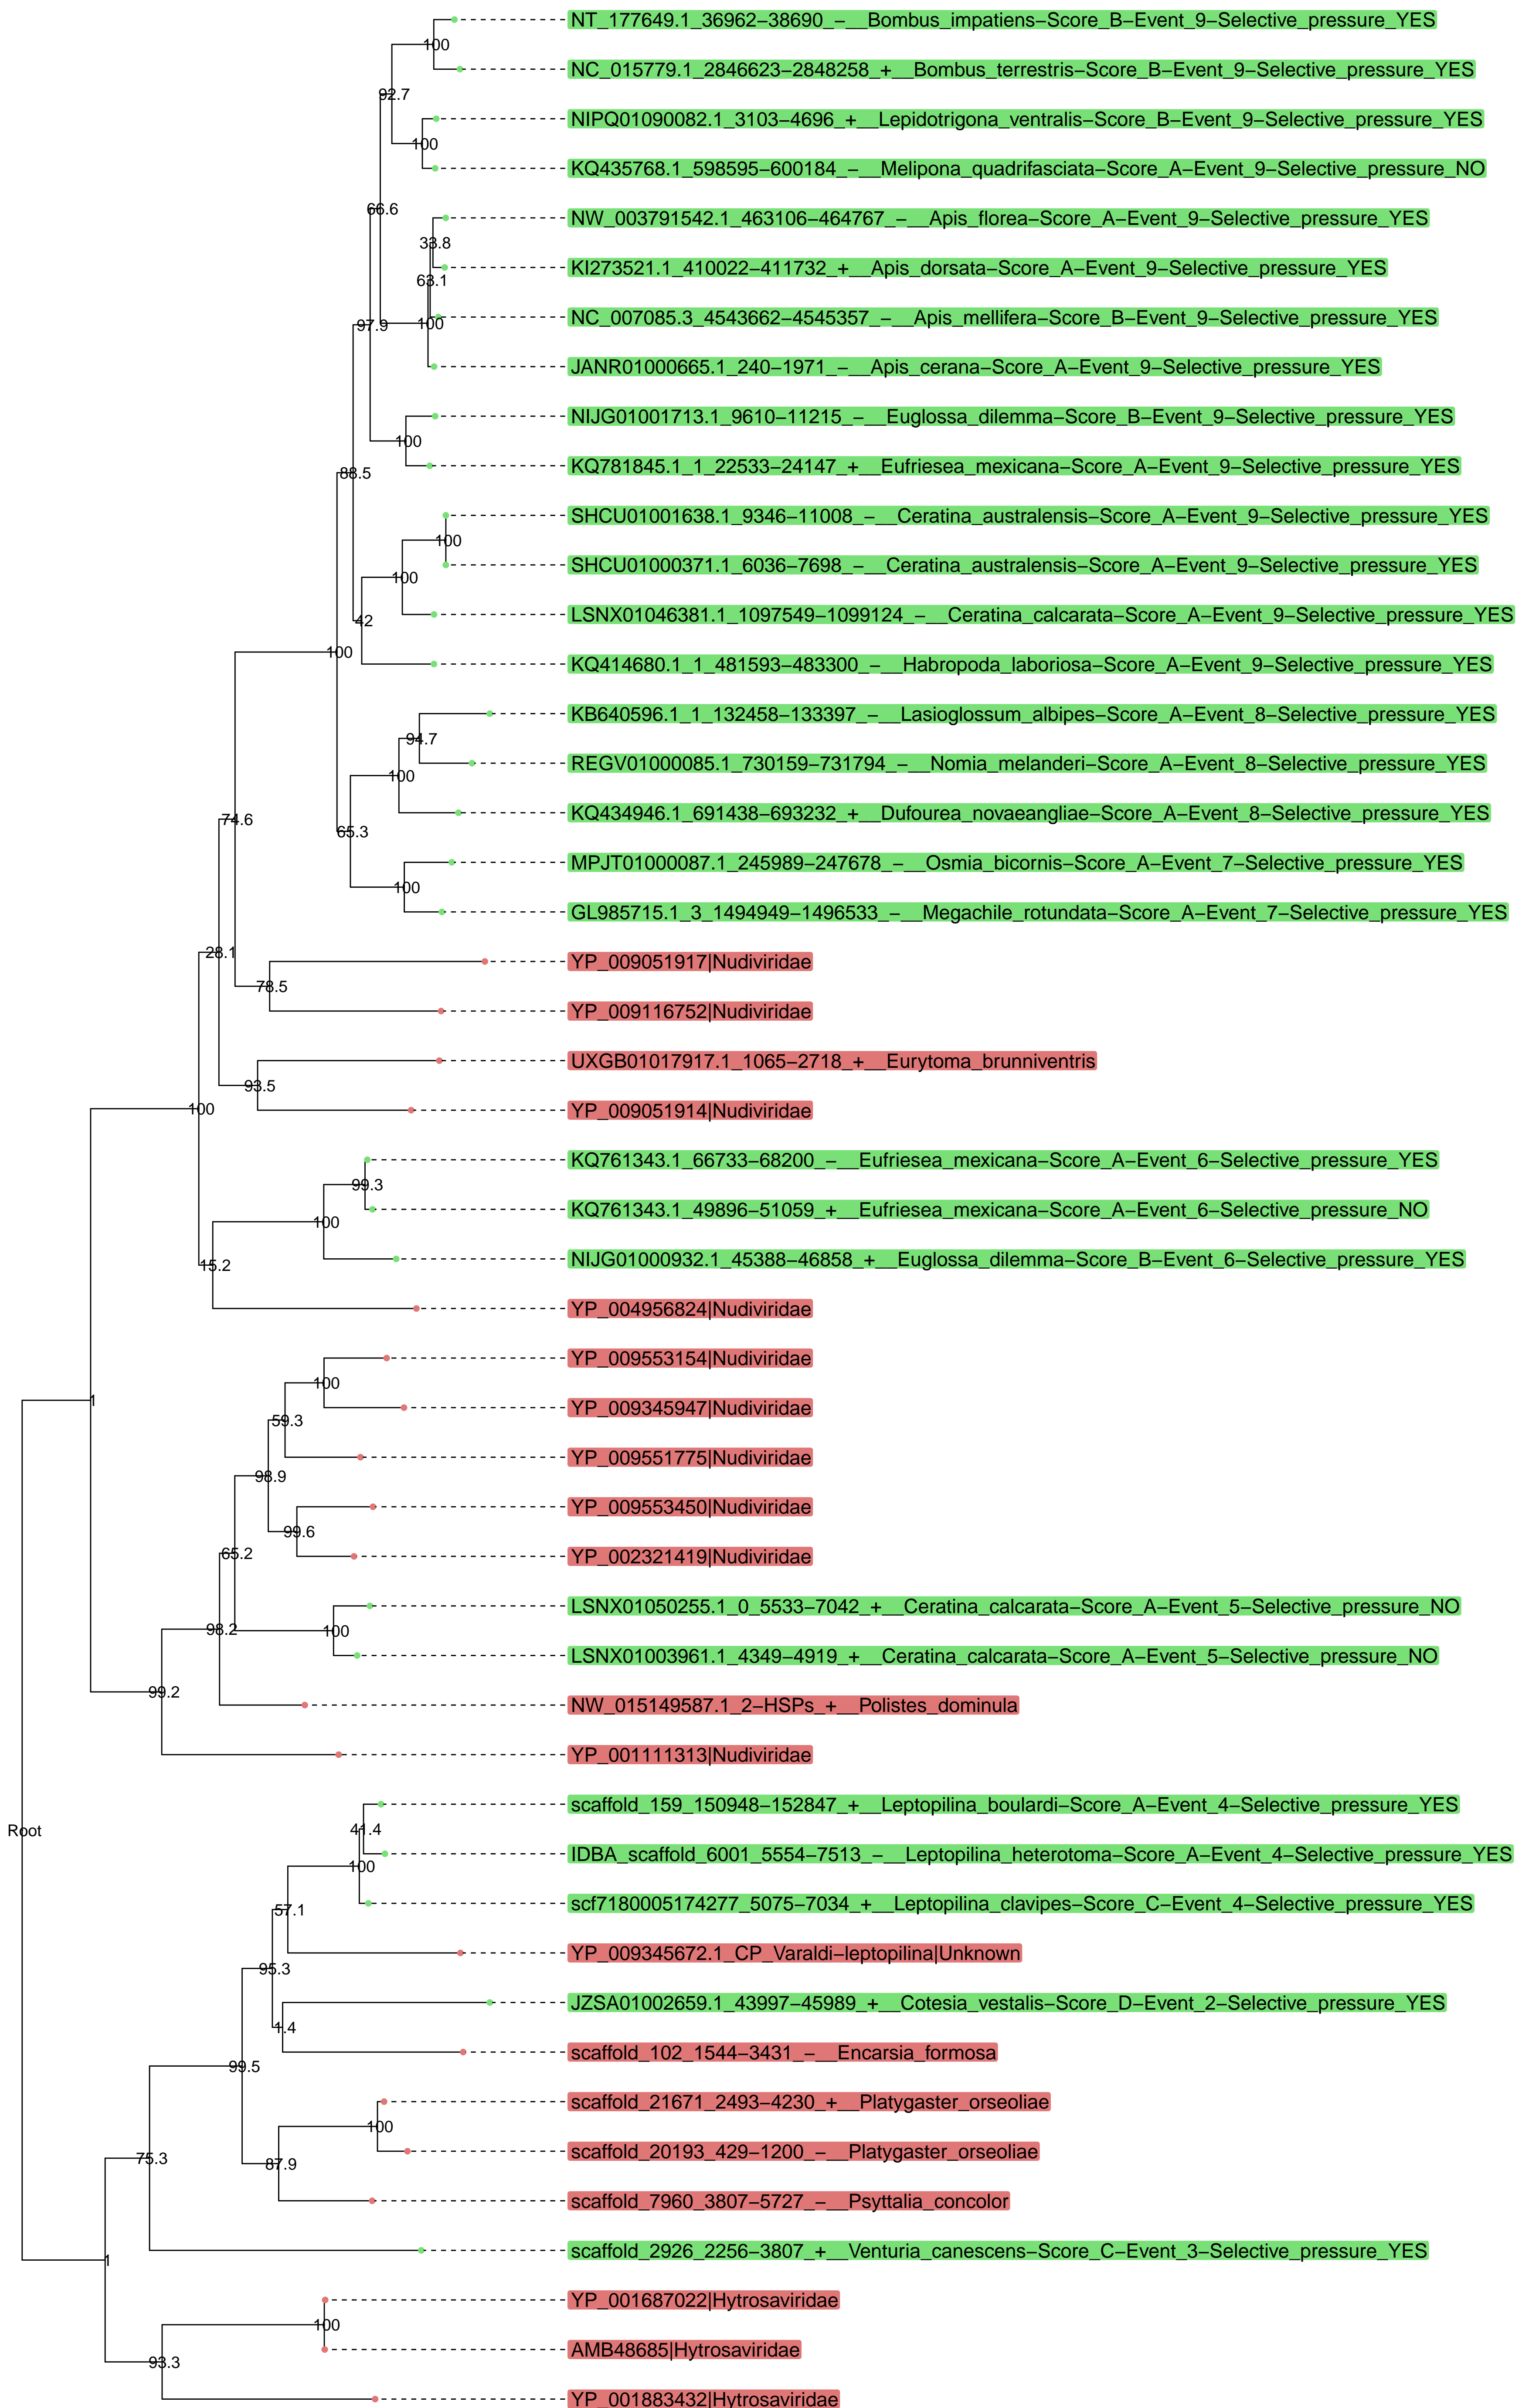

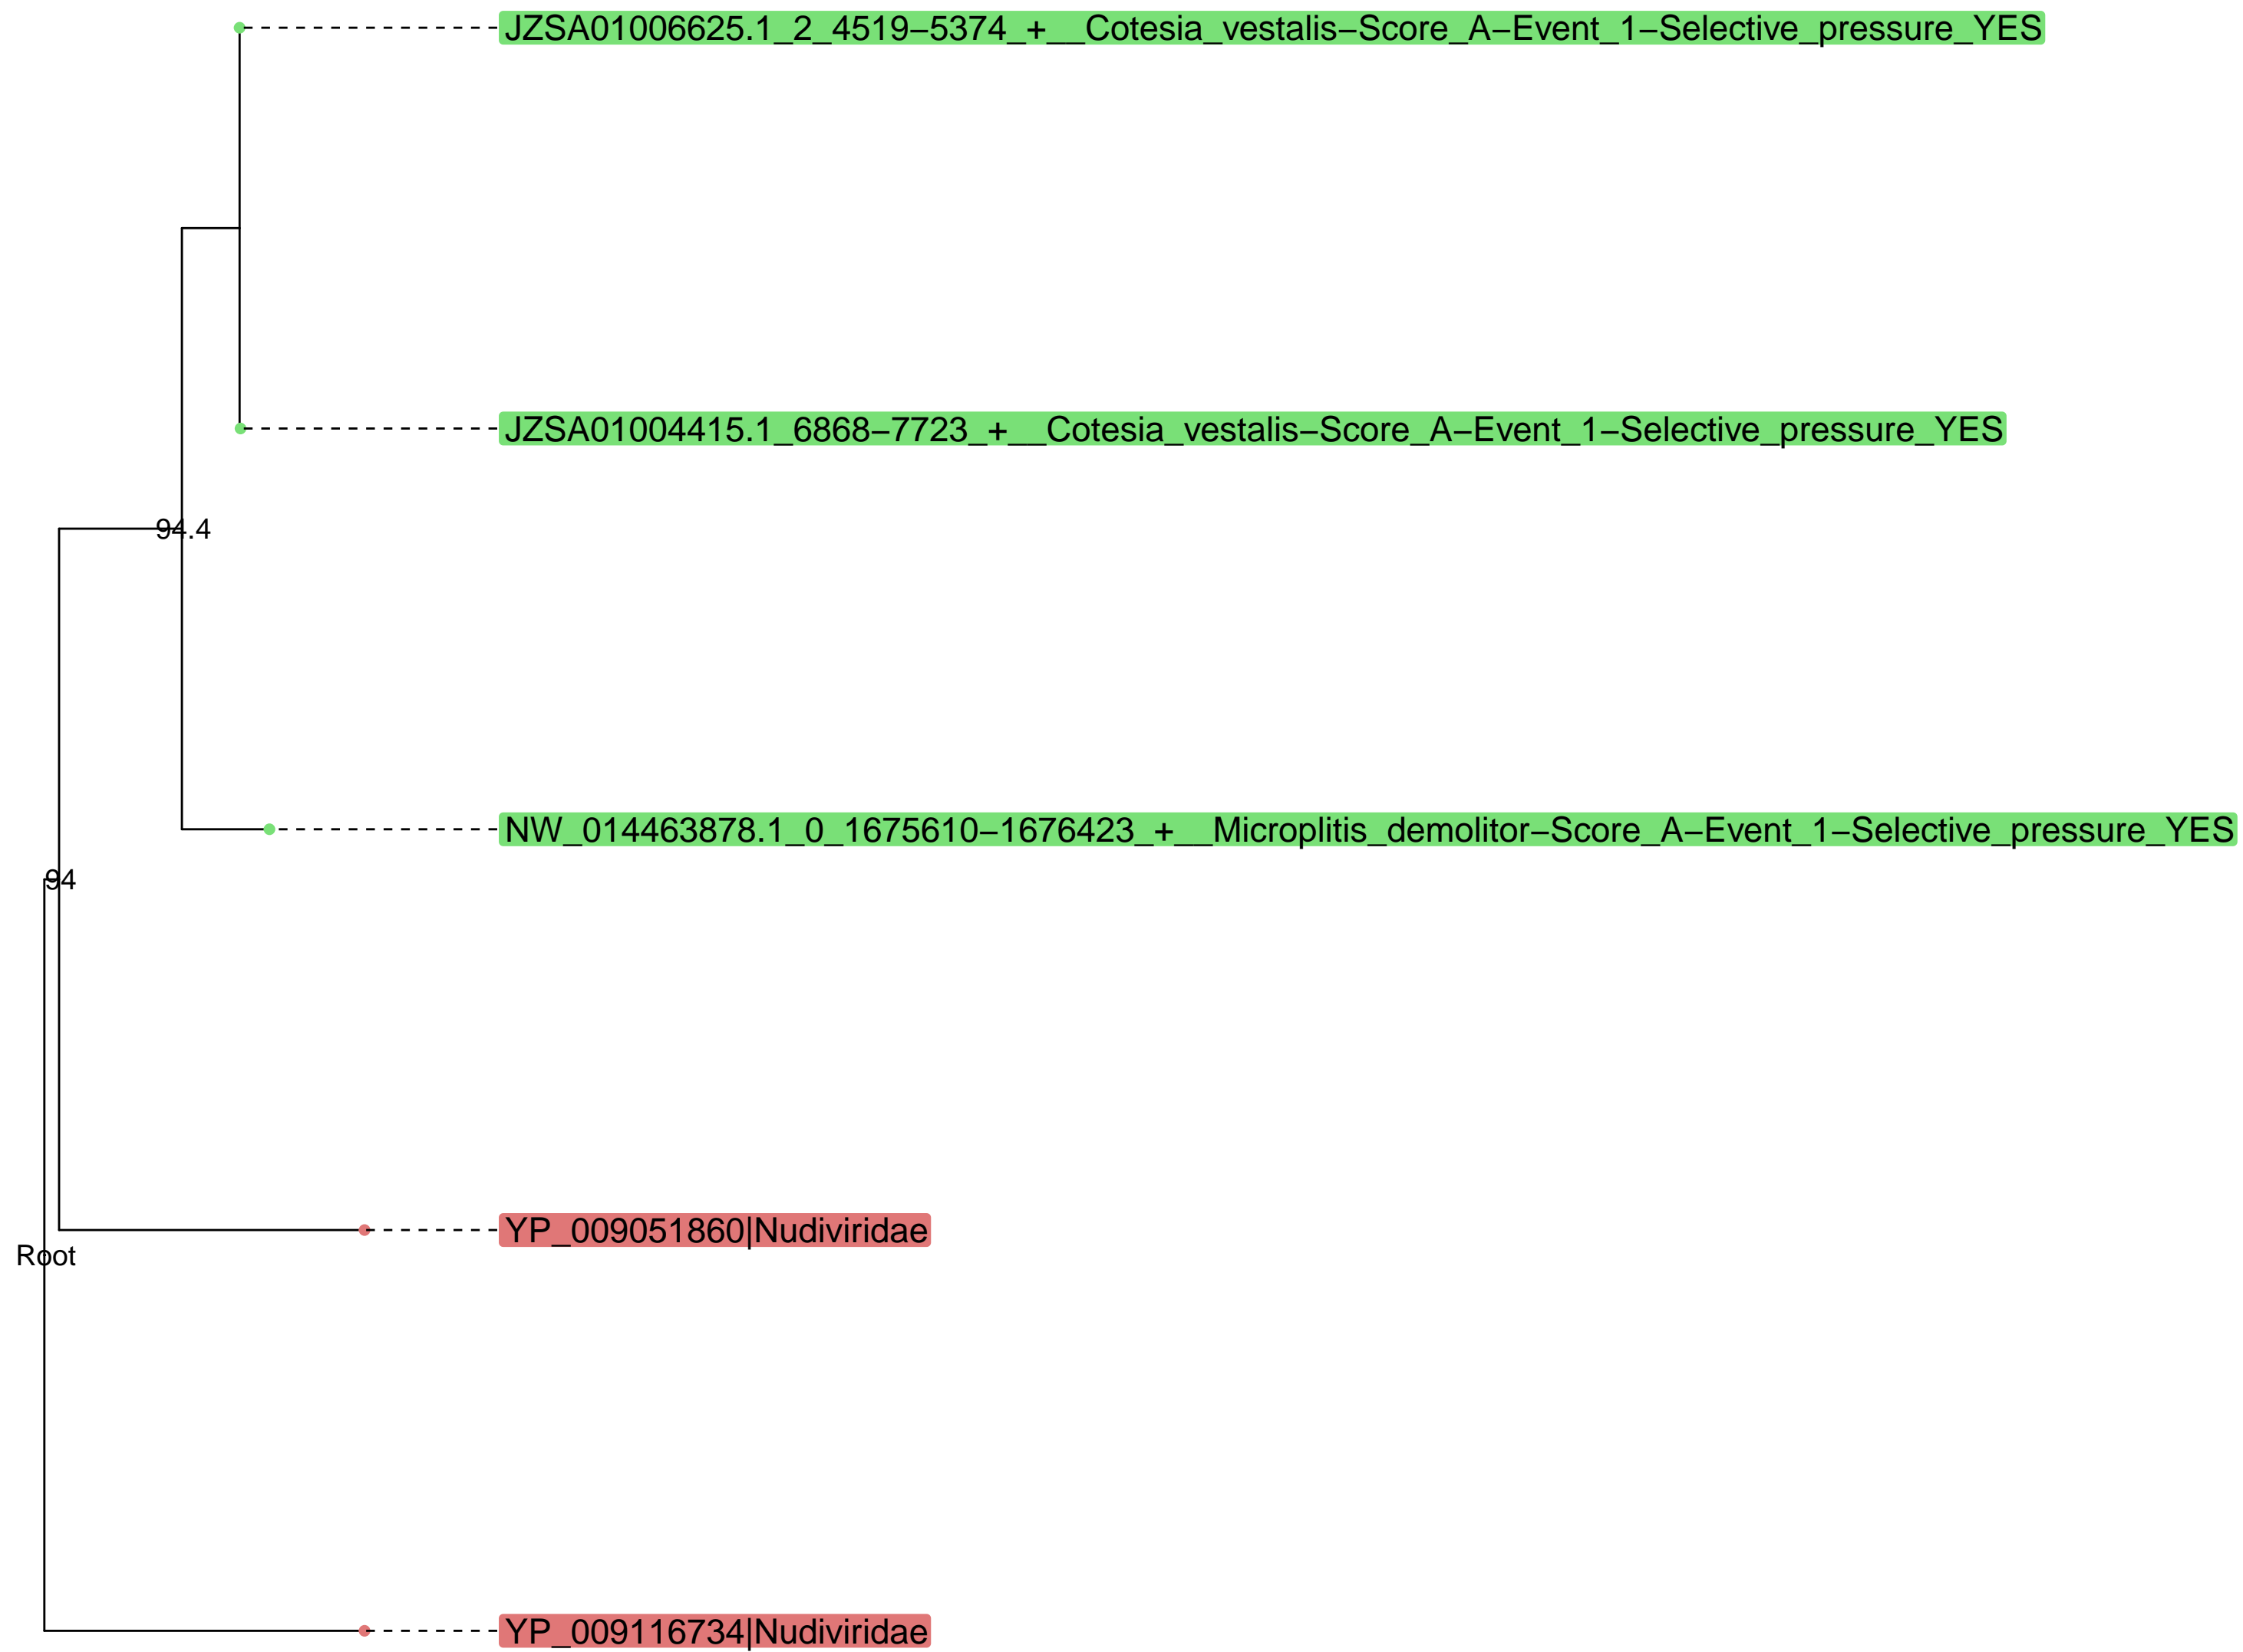

Cluster24469 – families involved : ['Nudiviridae'] – putative protein : ['VLF-1']

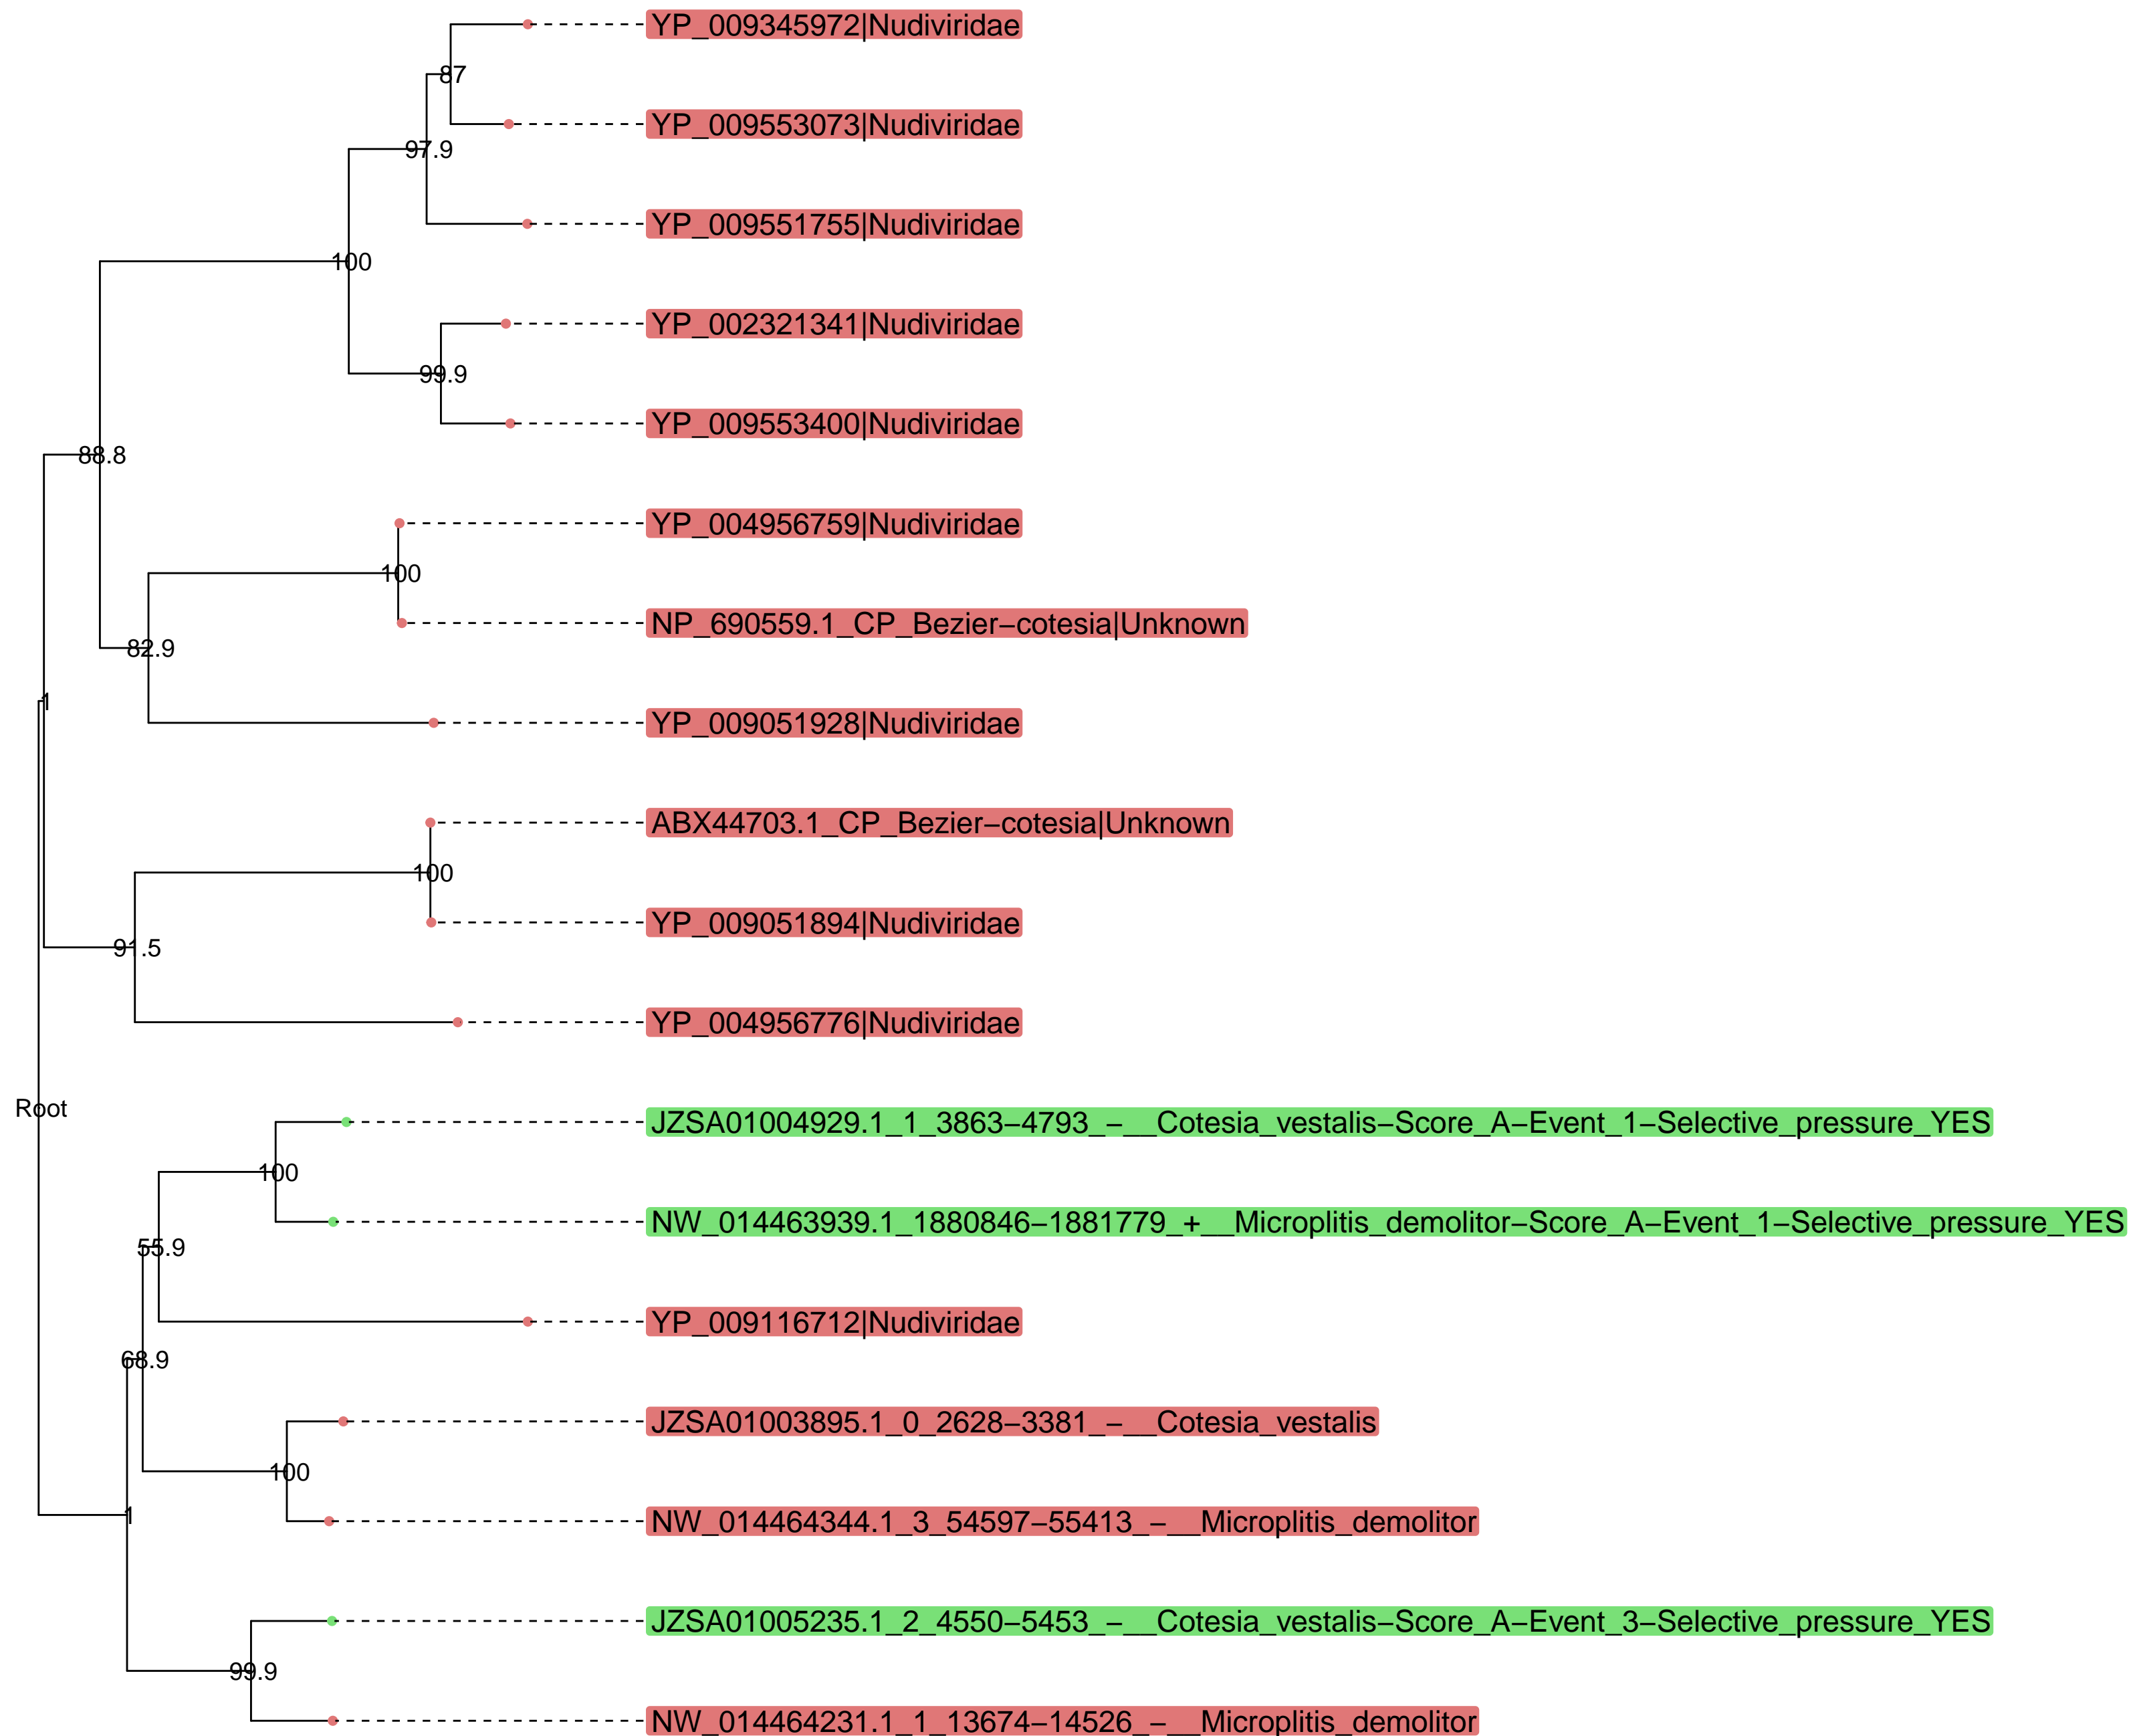

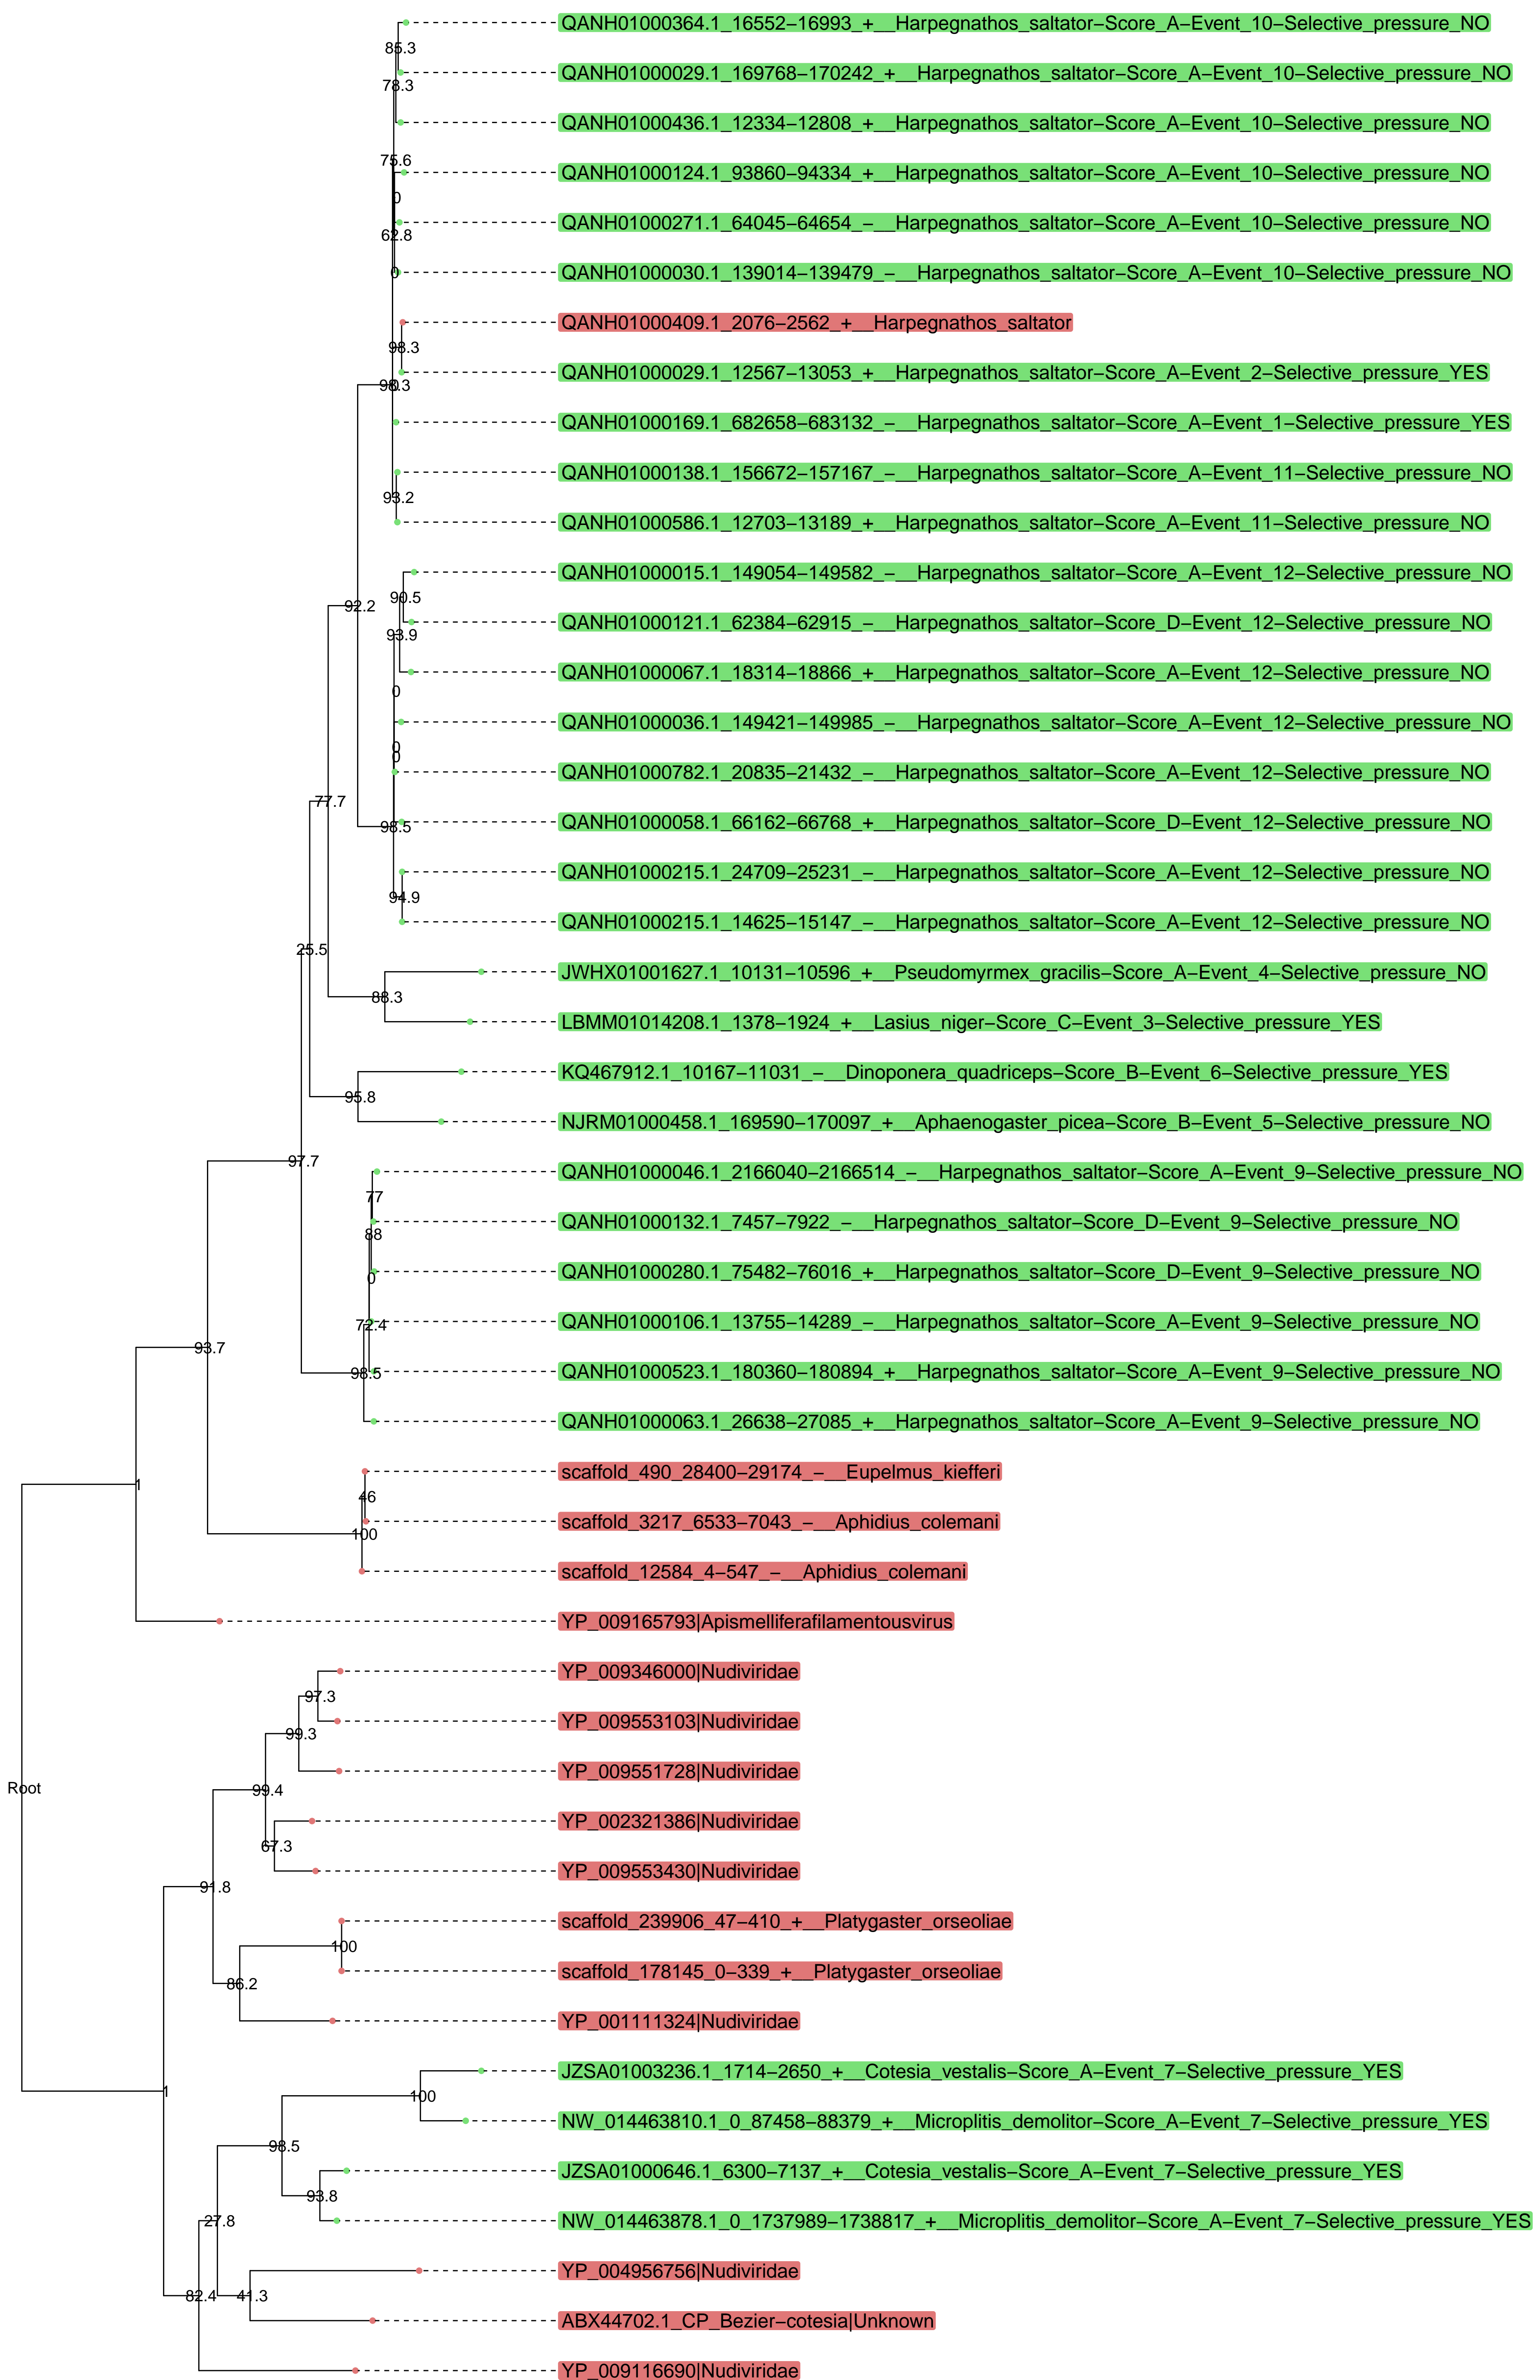

Cluster17433 – families involved : ['Nudiviridae'] – putative protein : ['PIF-5a']

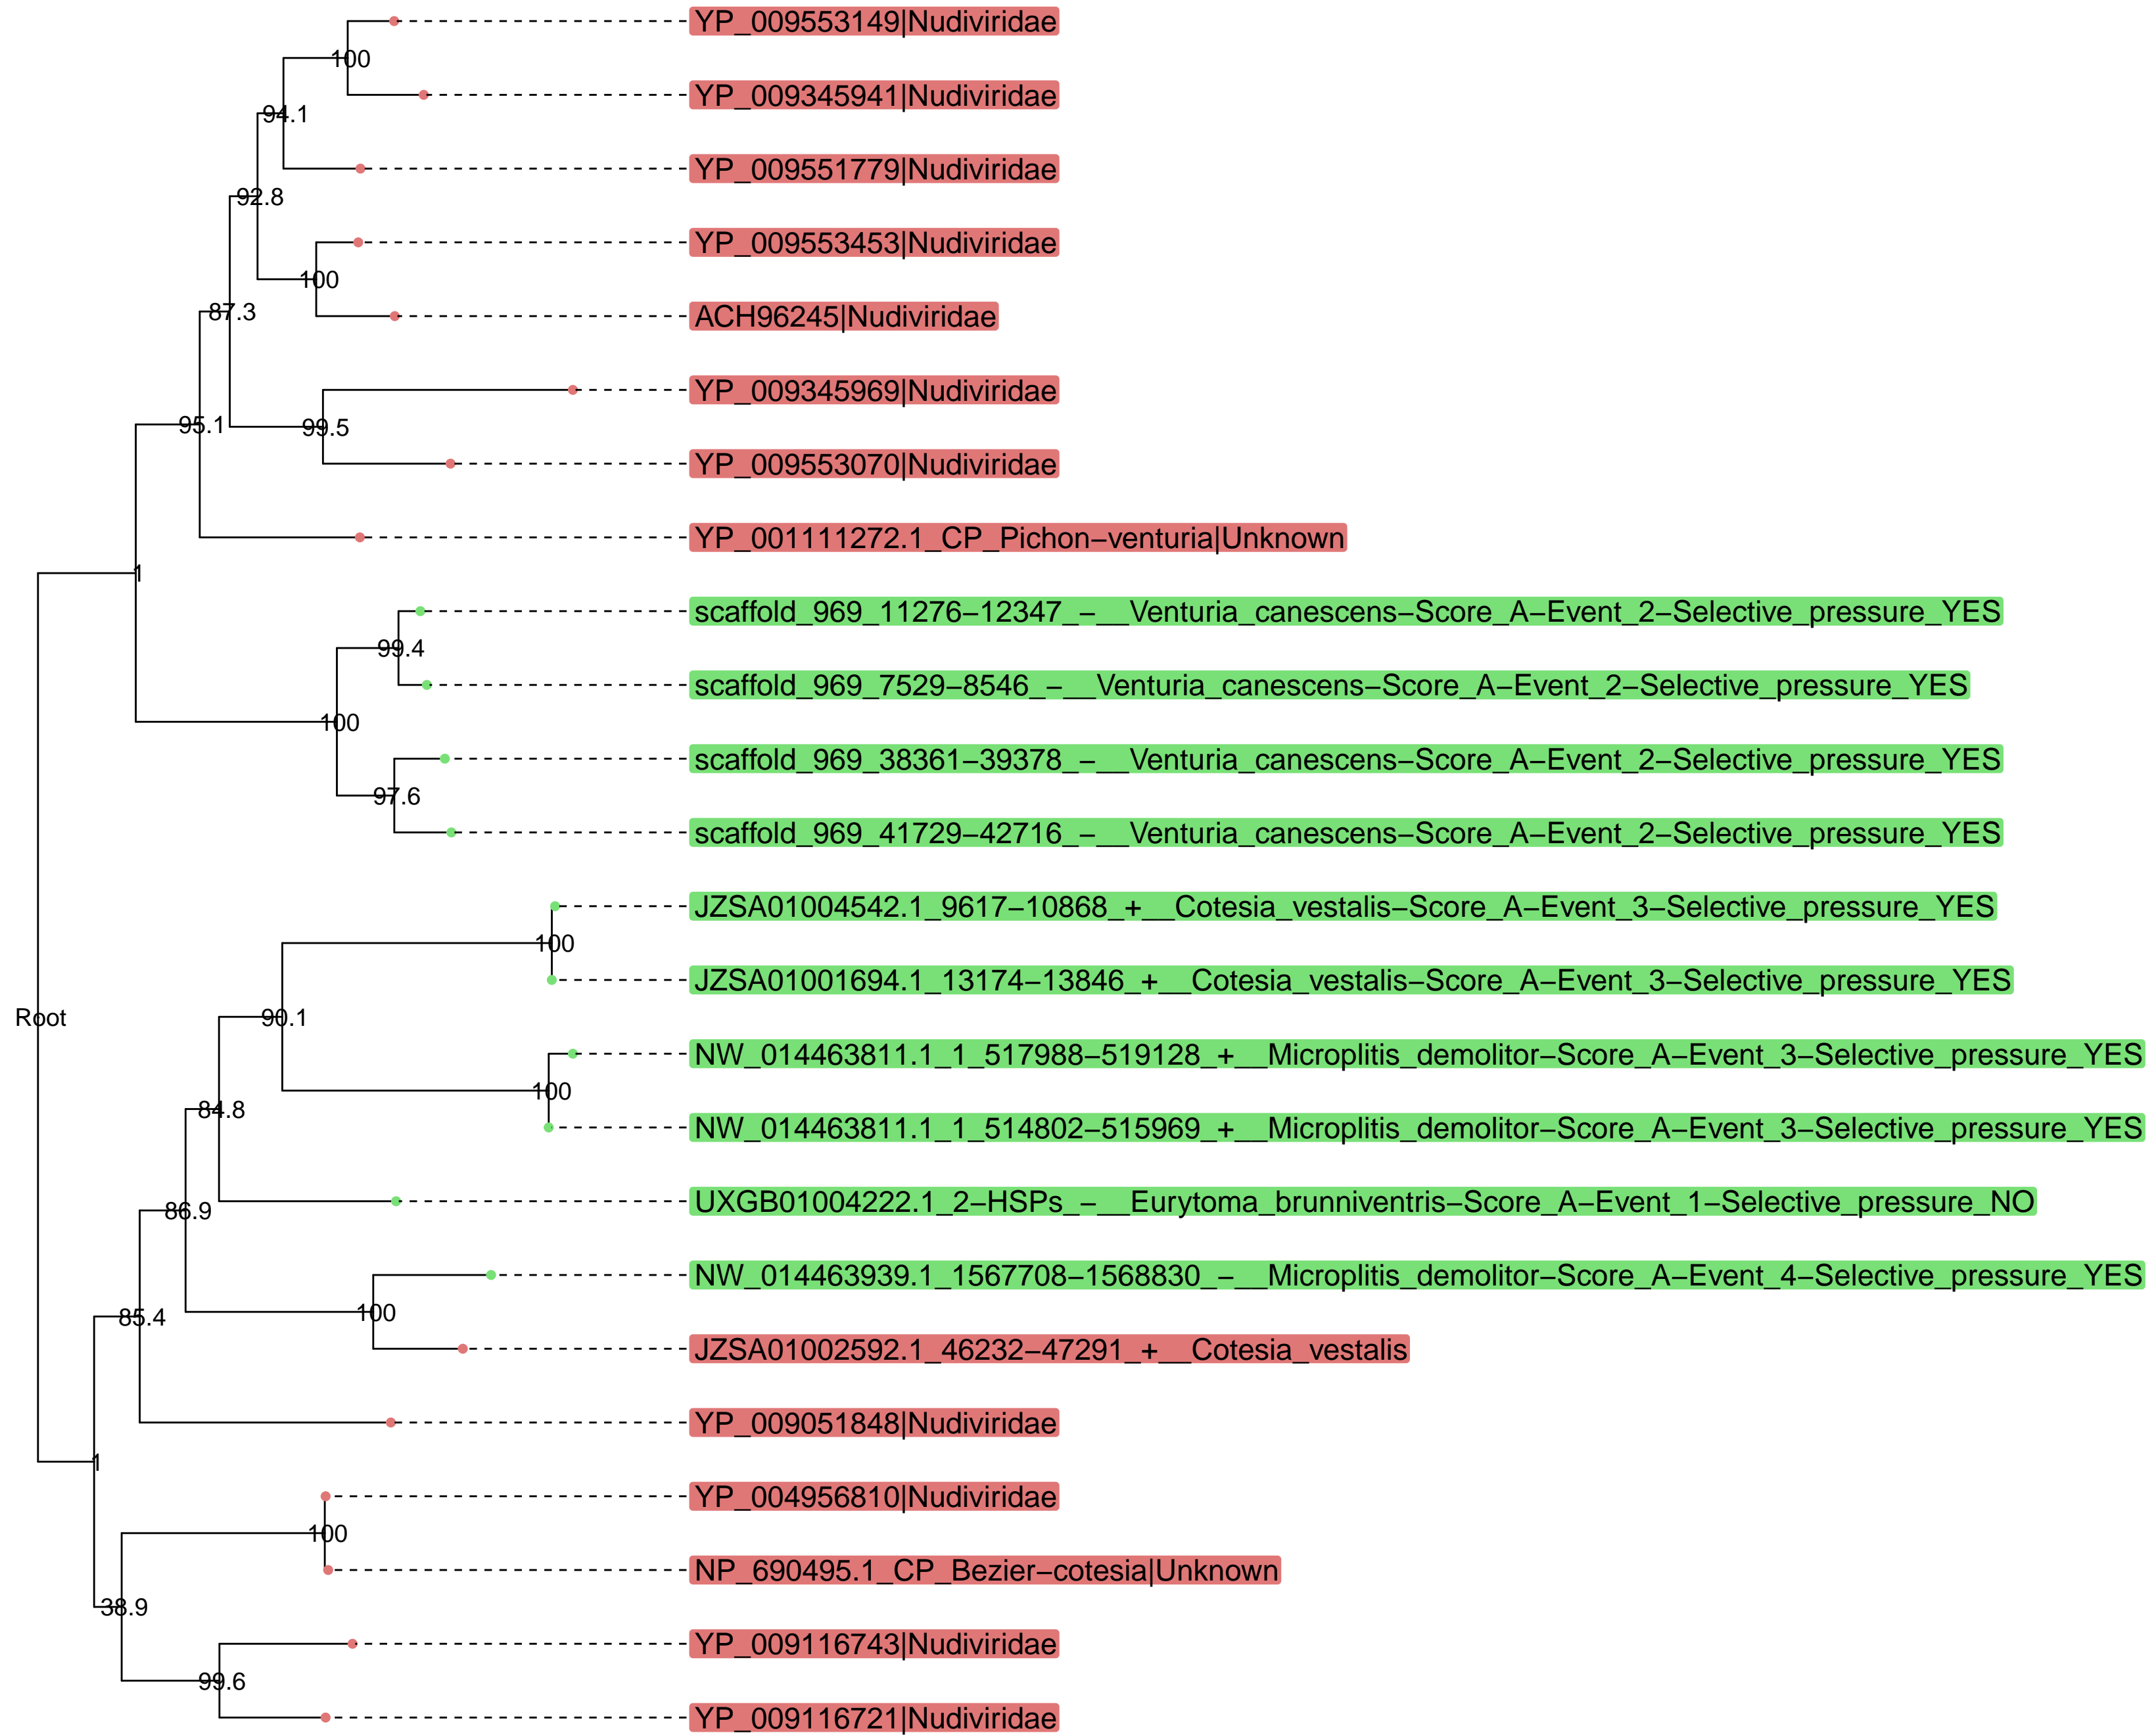

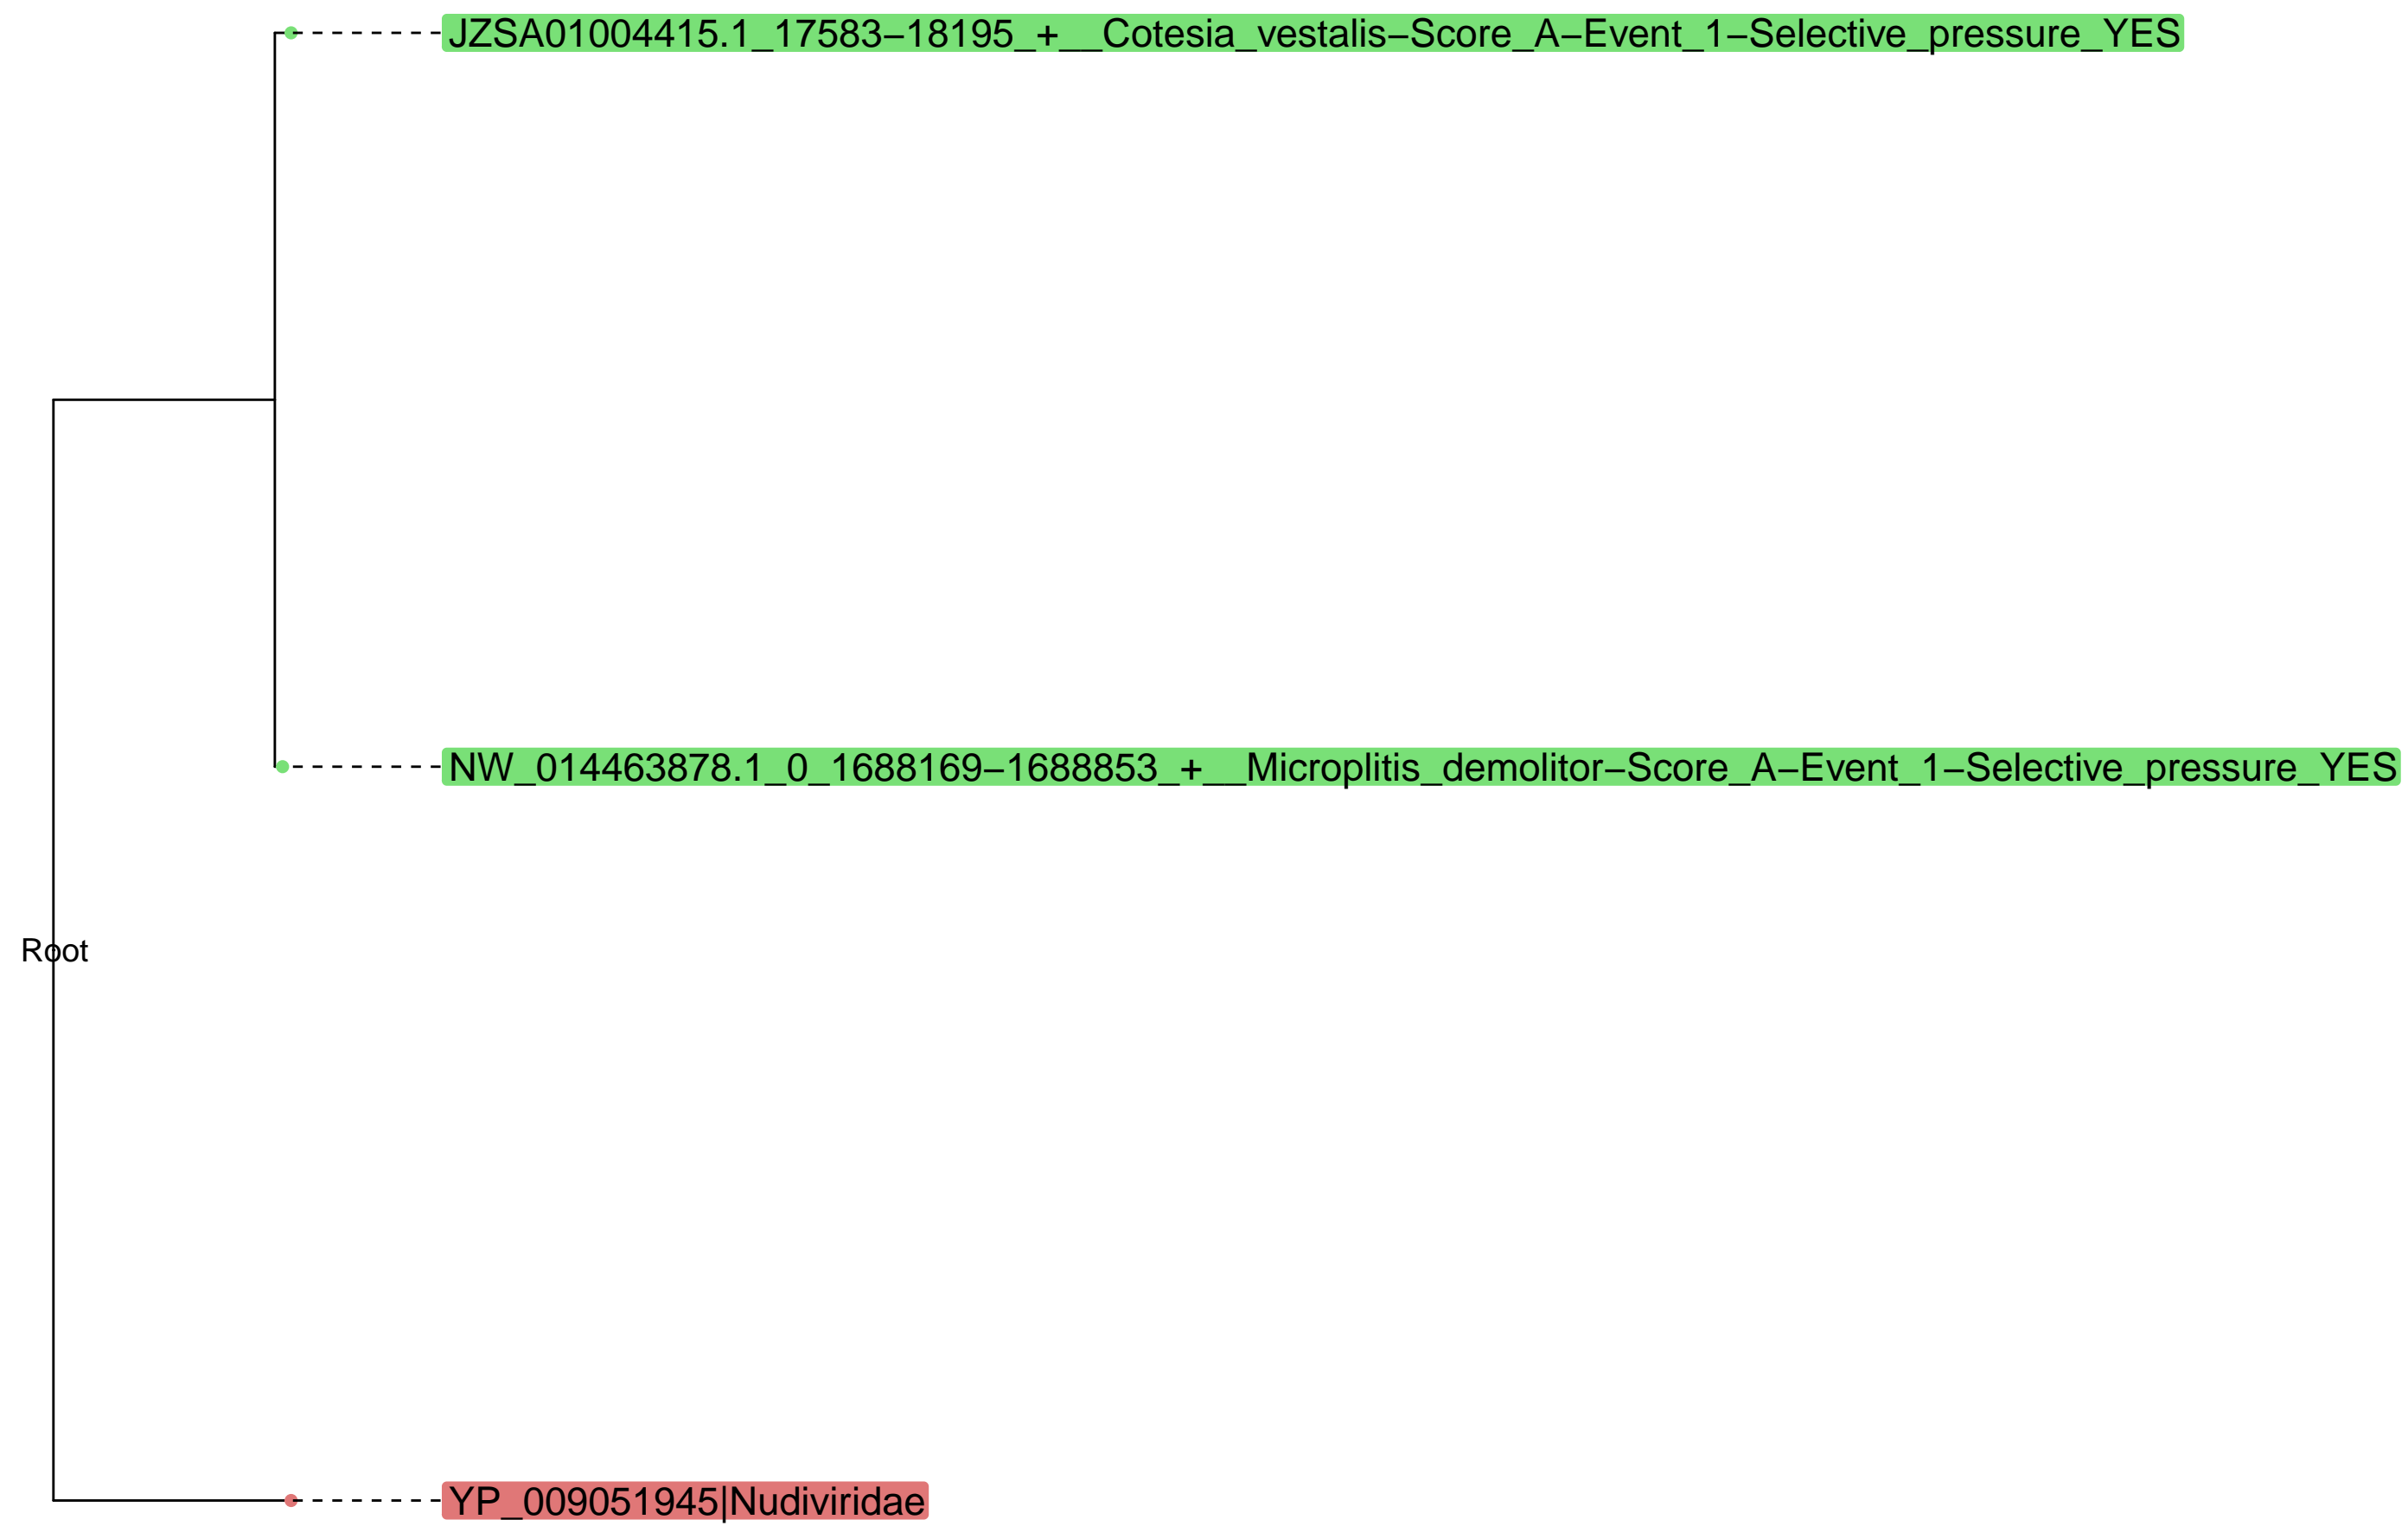

Cluster9642 – families involved : ['Nudiviridae'] – putative protein : ['GrBNV\_gp75-like protein']

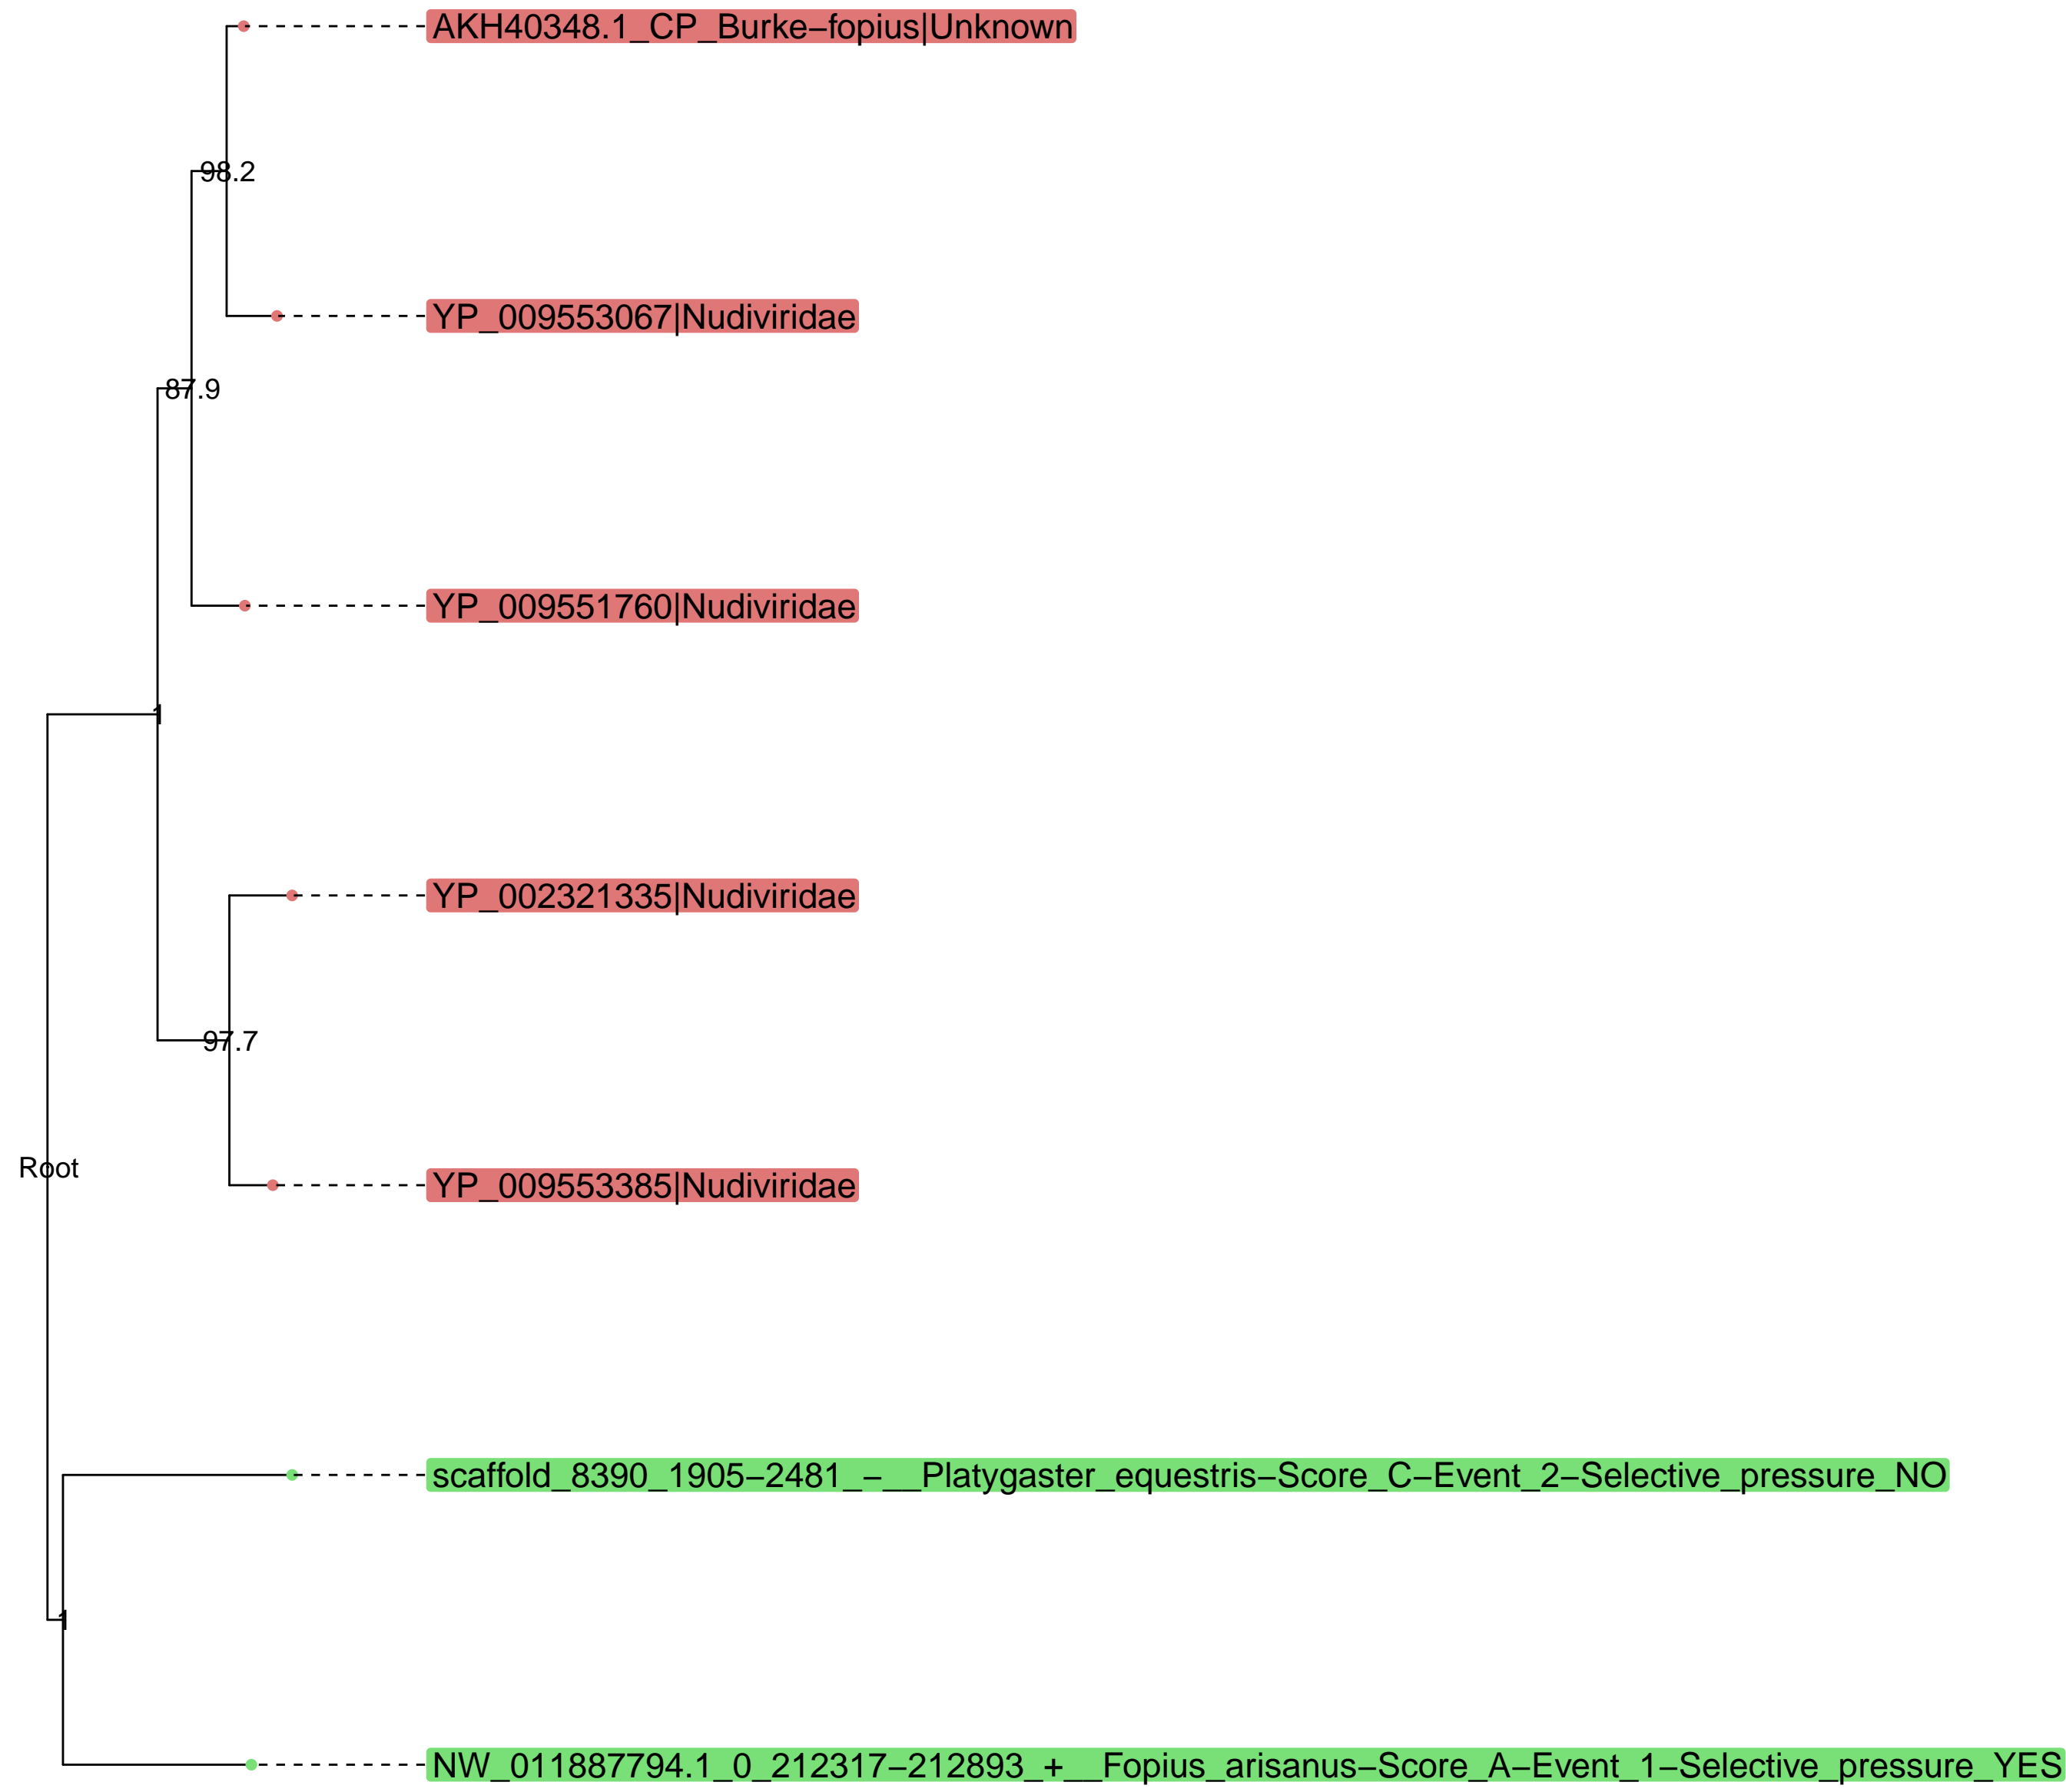

Cluster9535 – families involved : ['Nudiviridae'] – putative protein : ['Late expression factor 4']

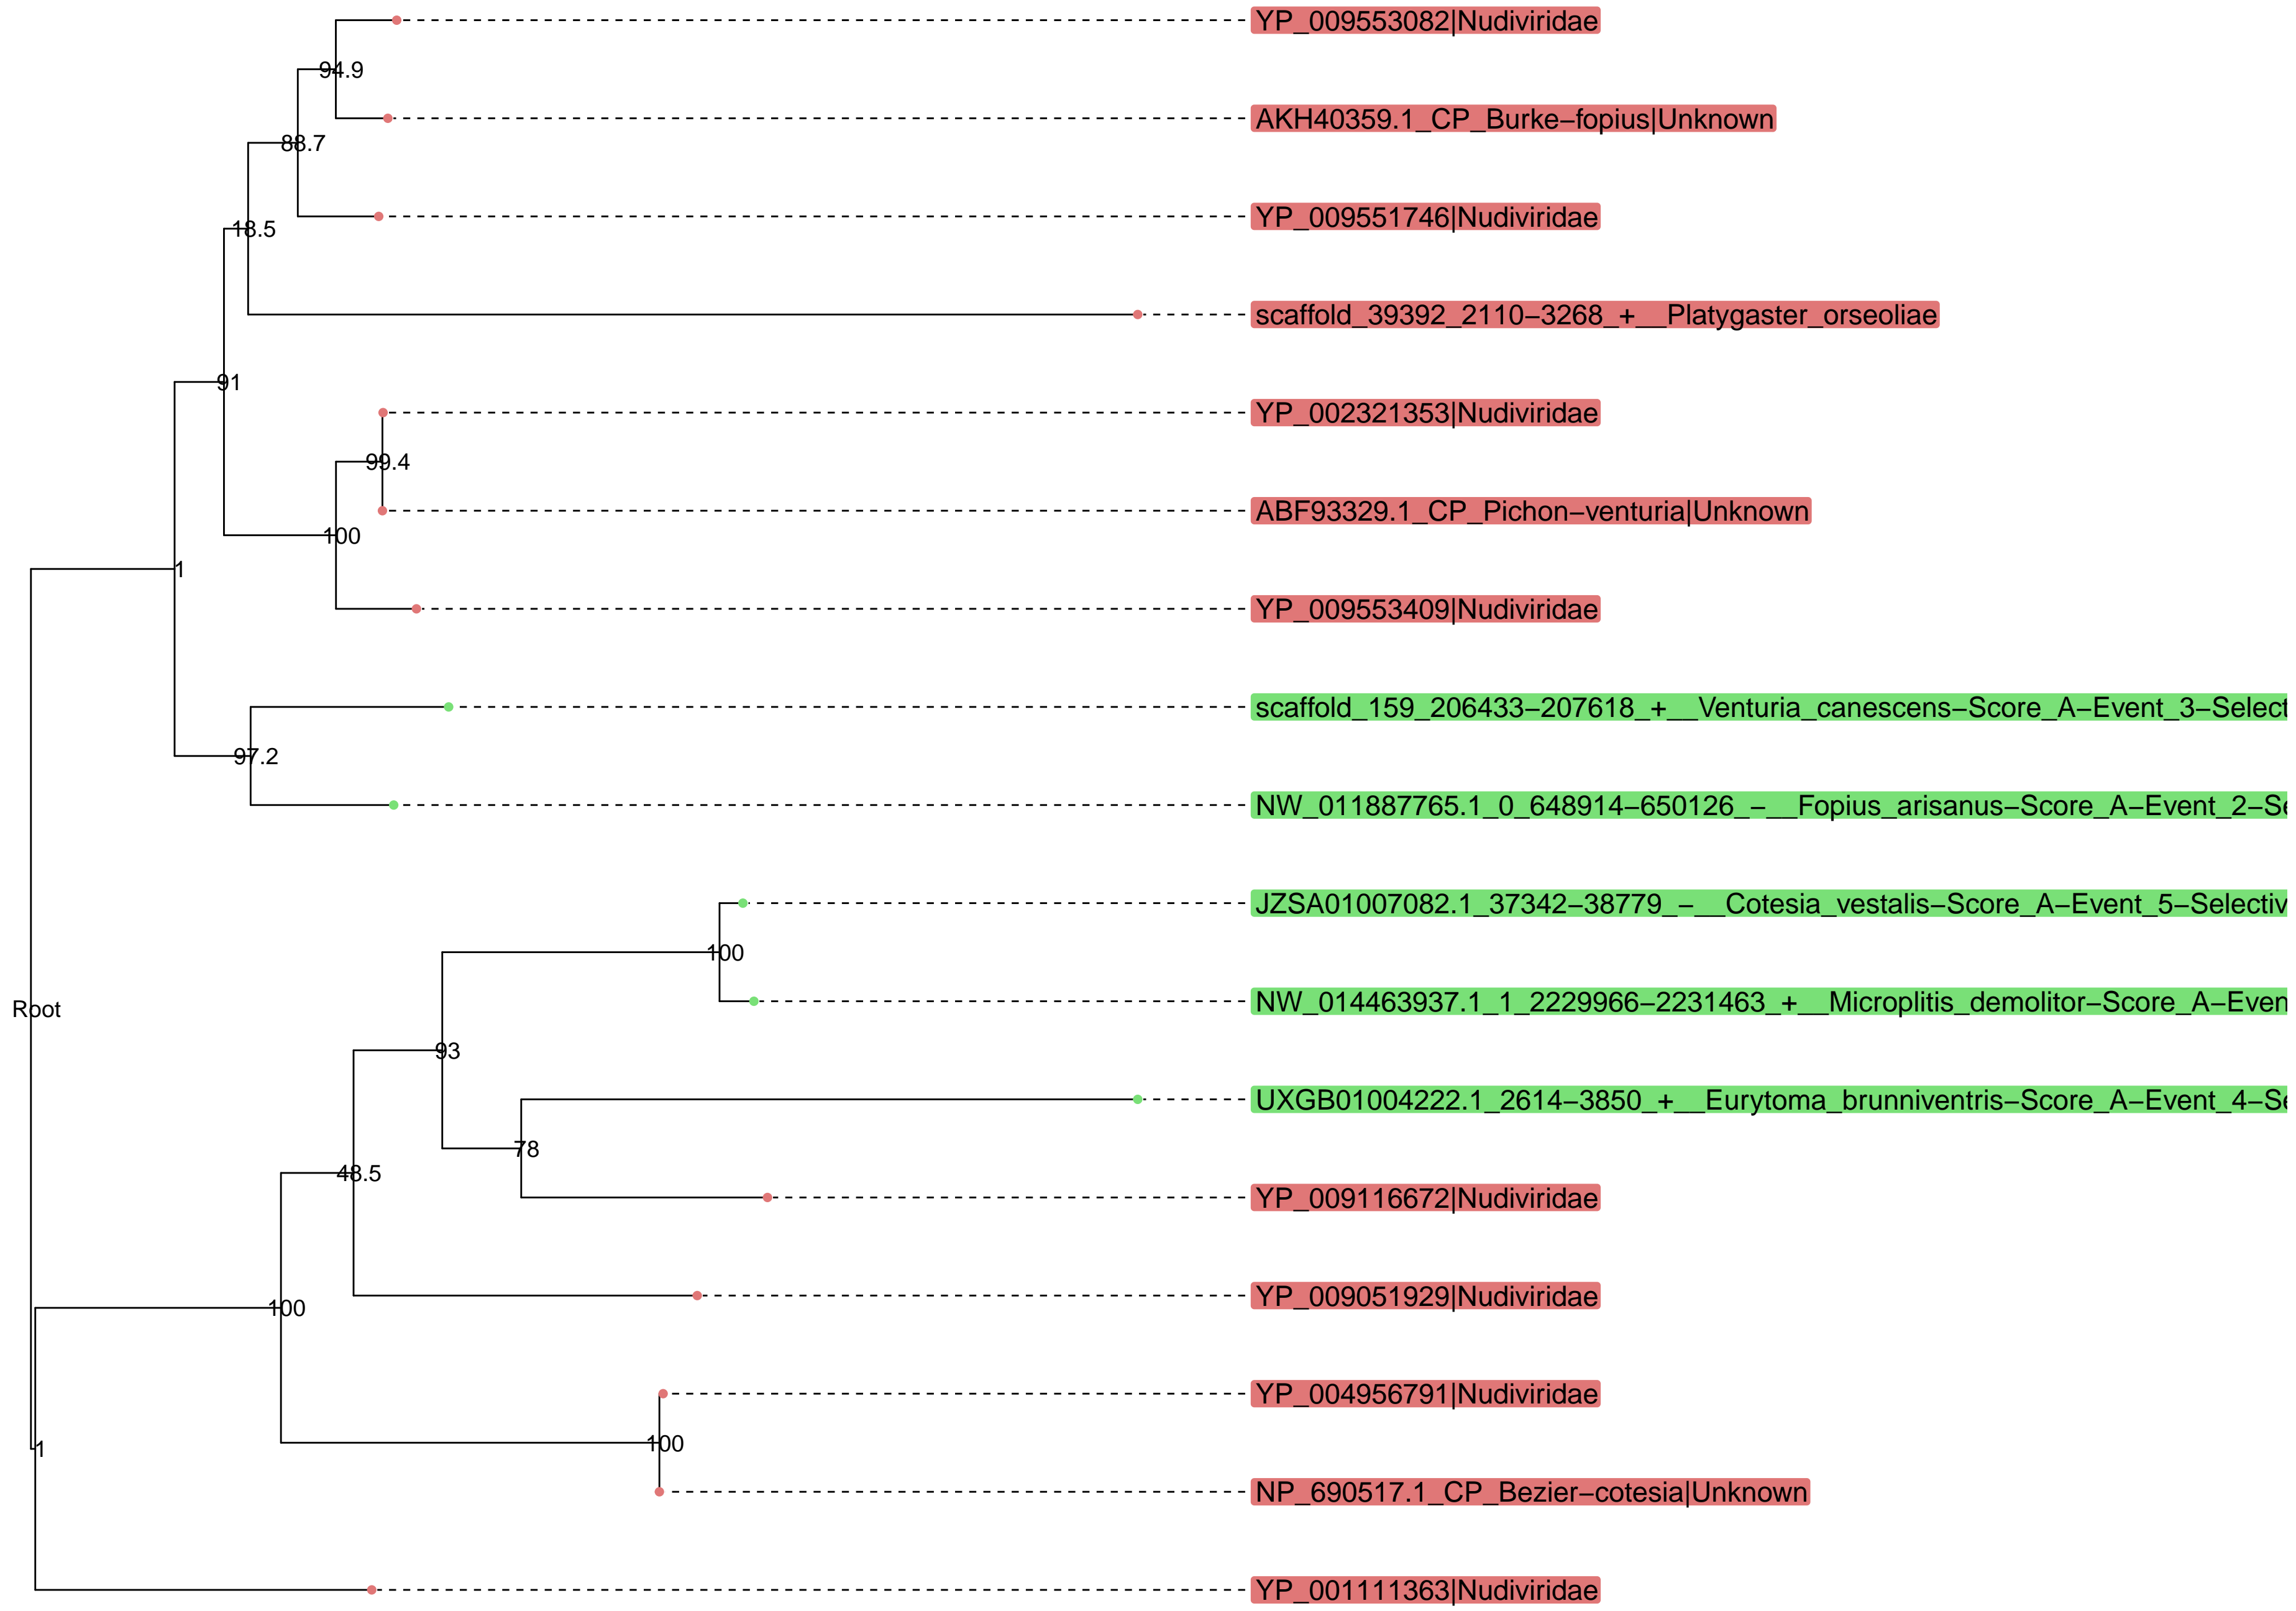



Cluster8604 – families involved : ['Nudiviridae'] – putative protein : ['GrBNV\_gp60-like protein']

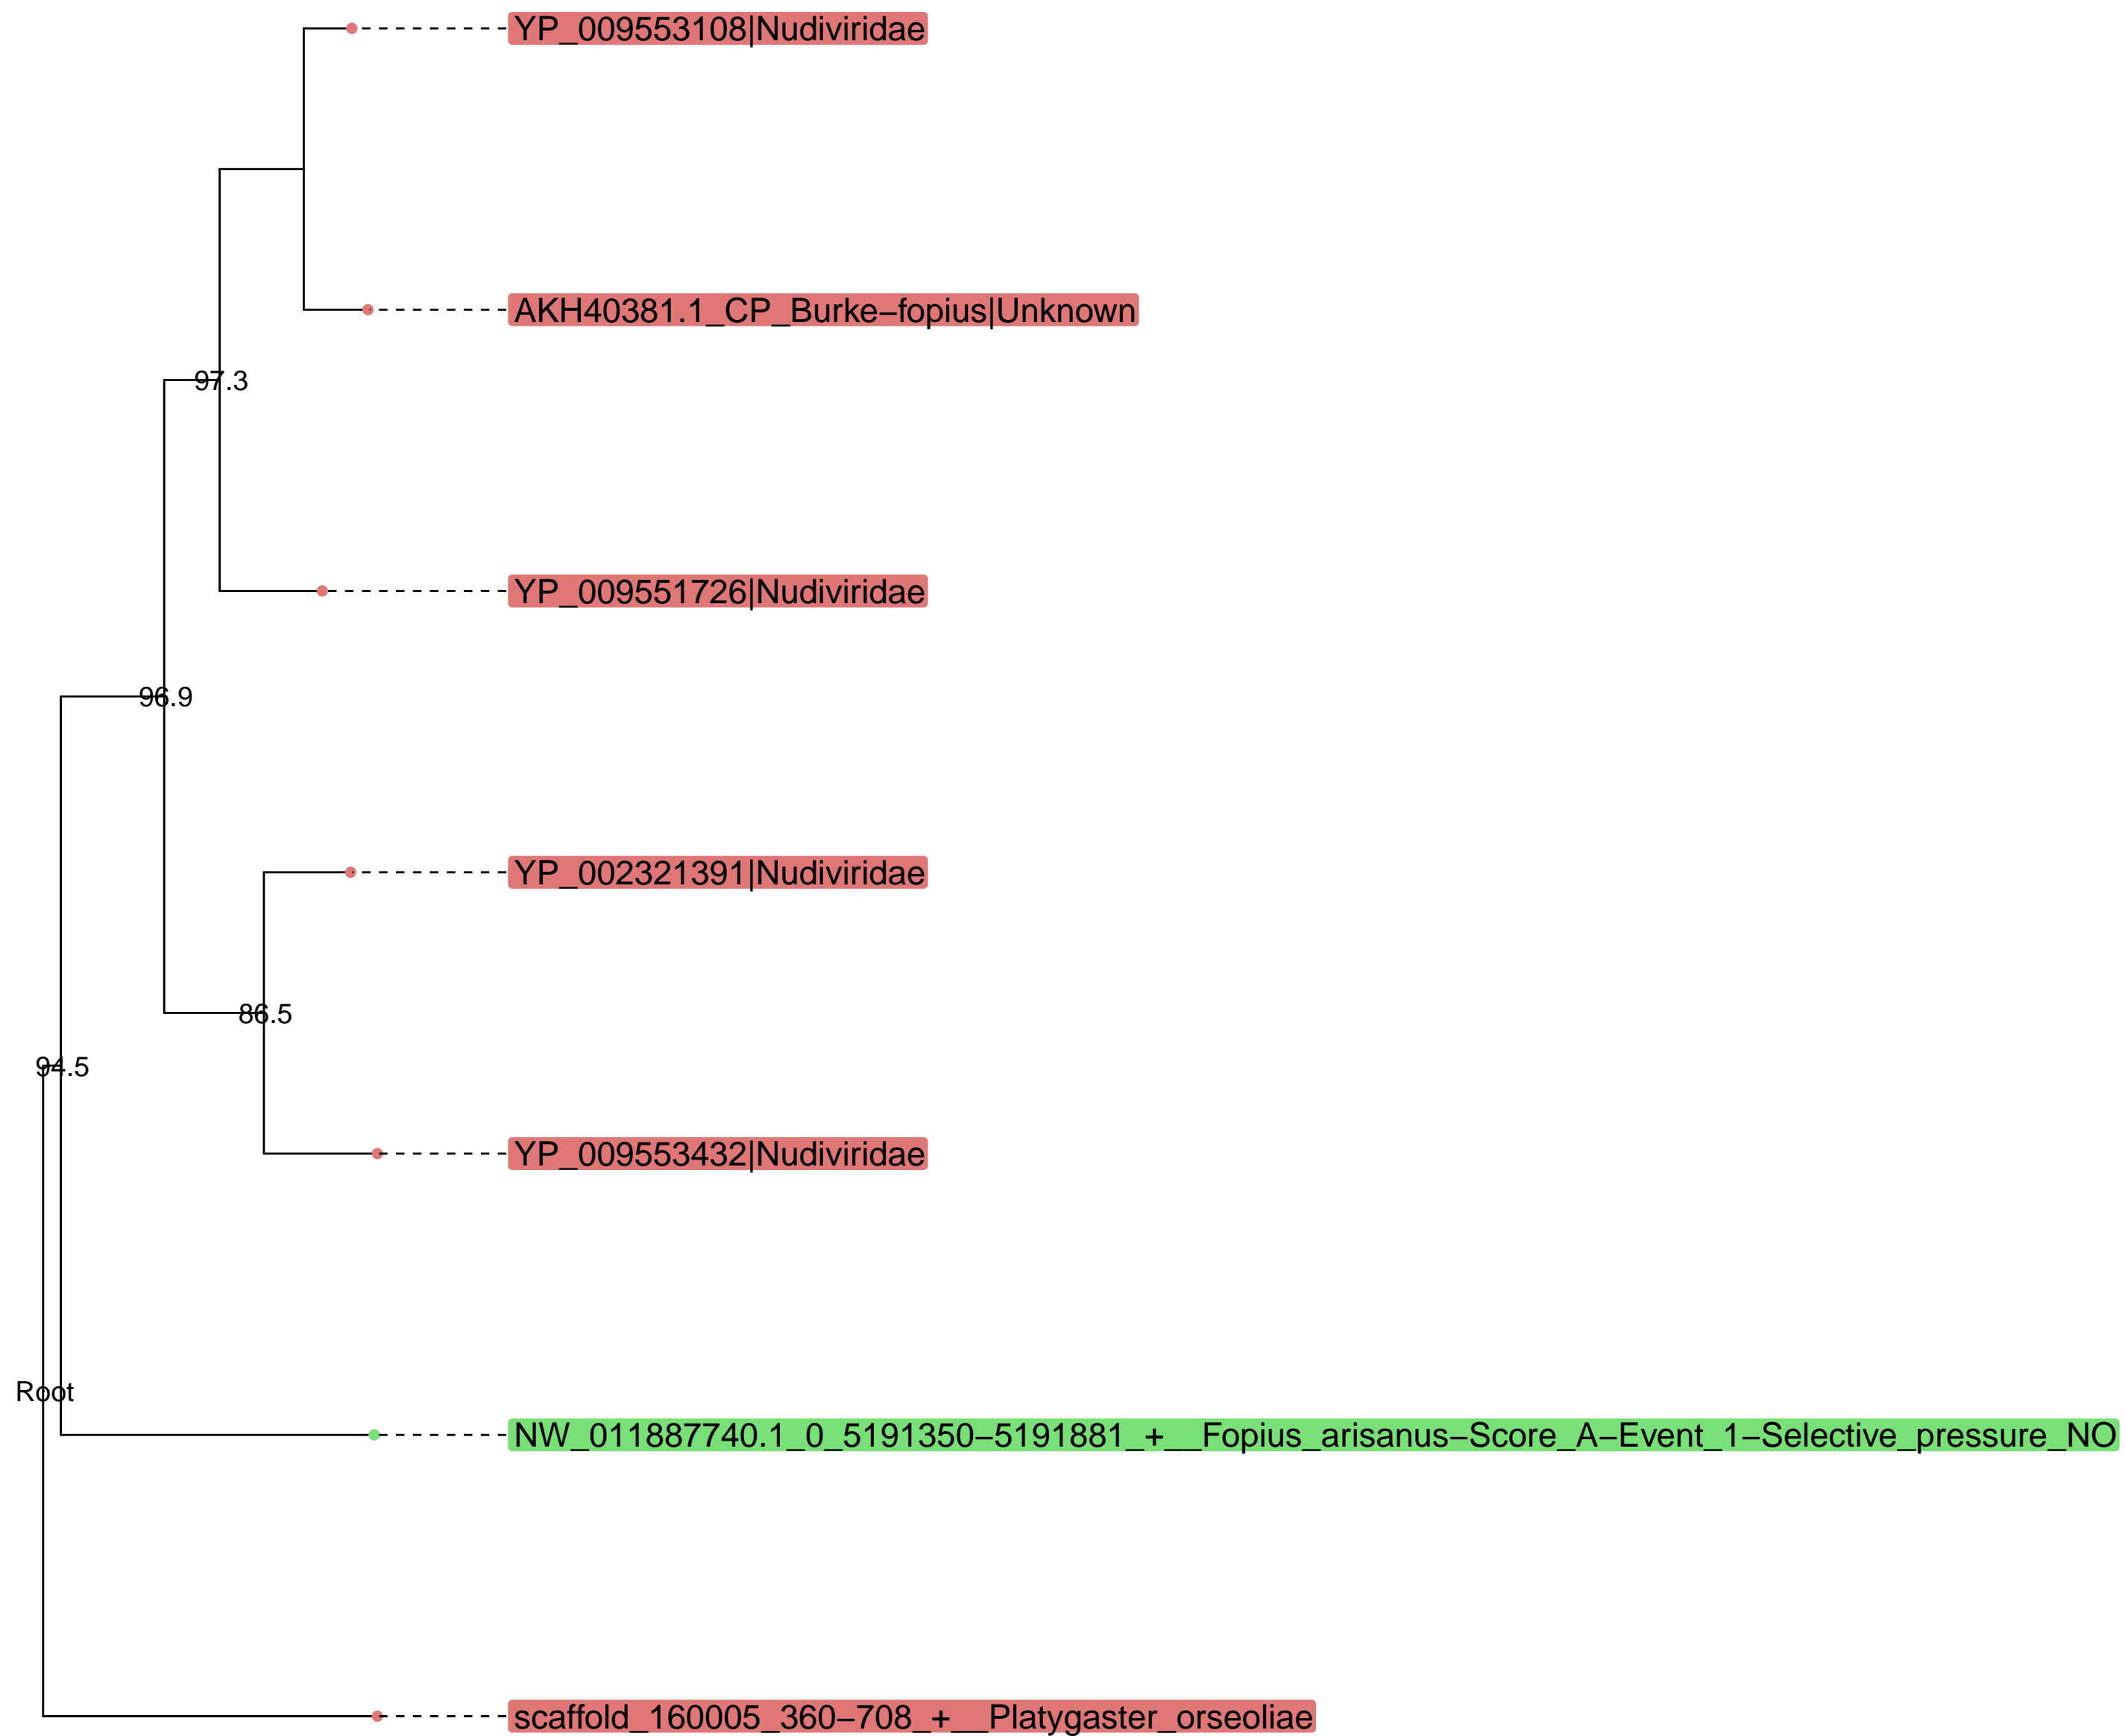

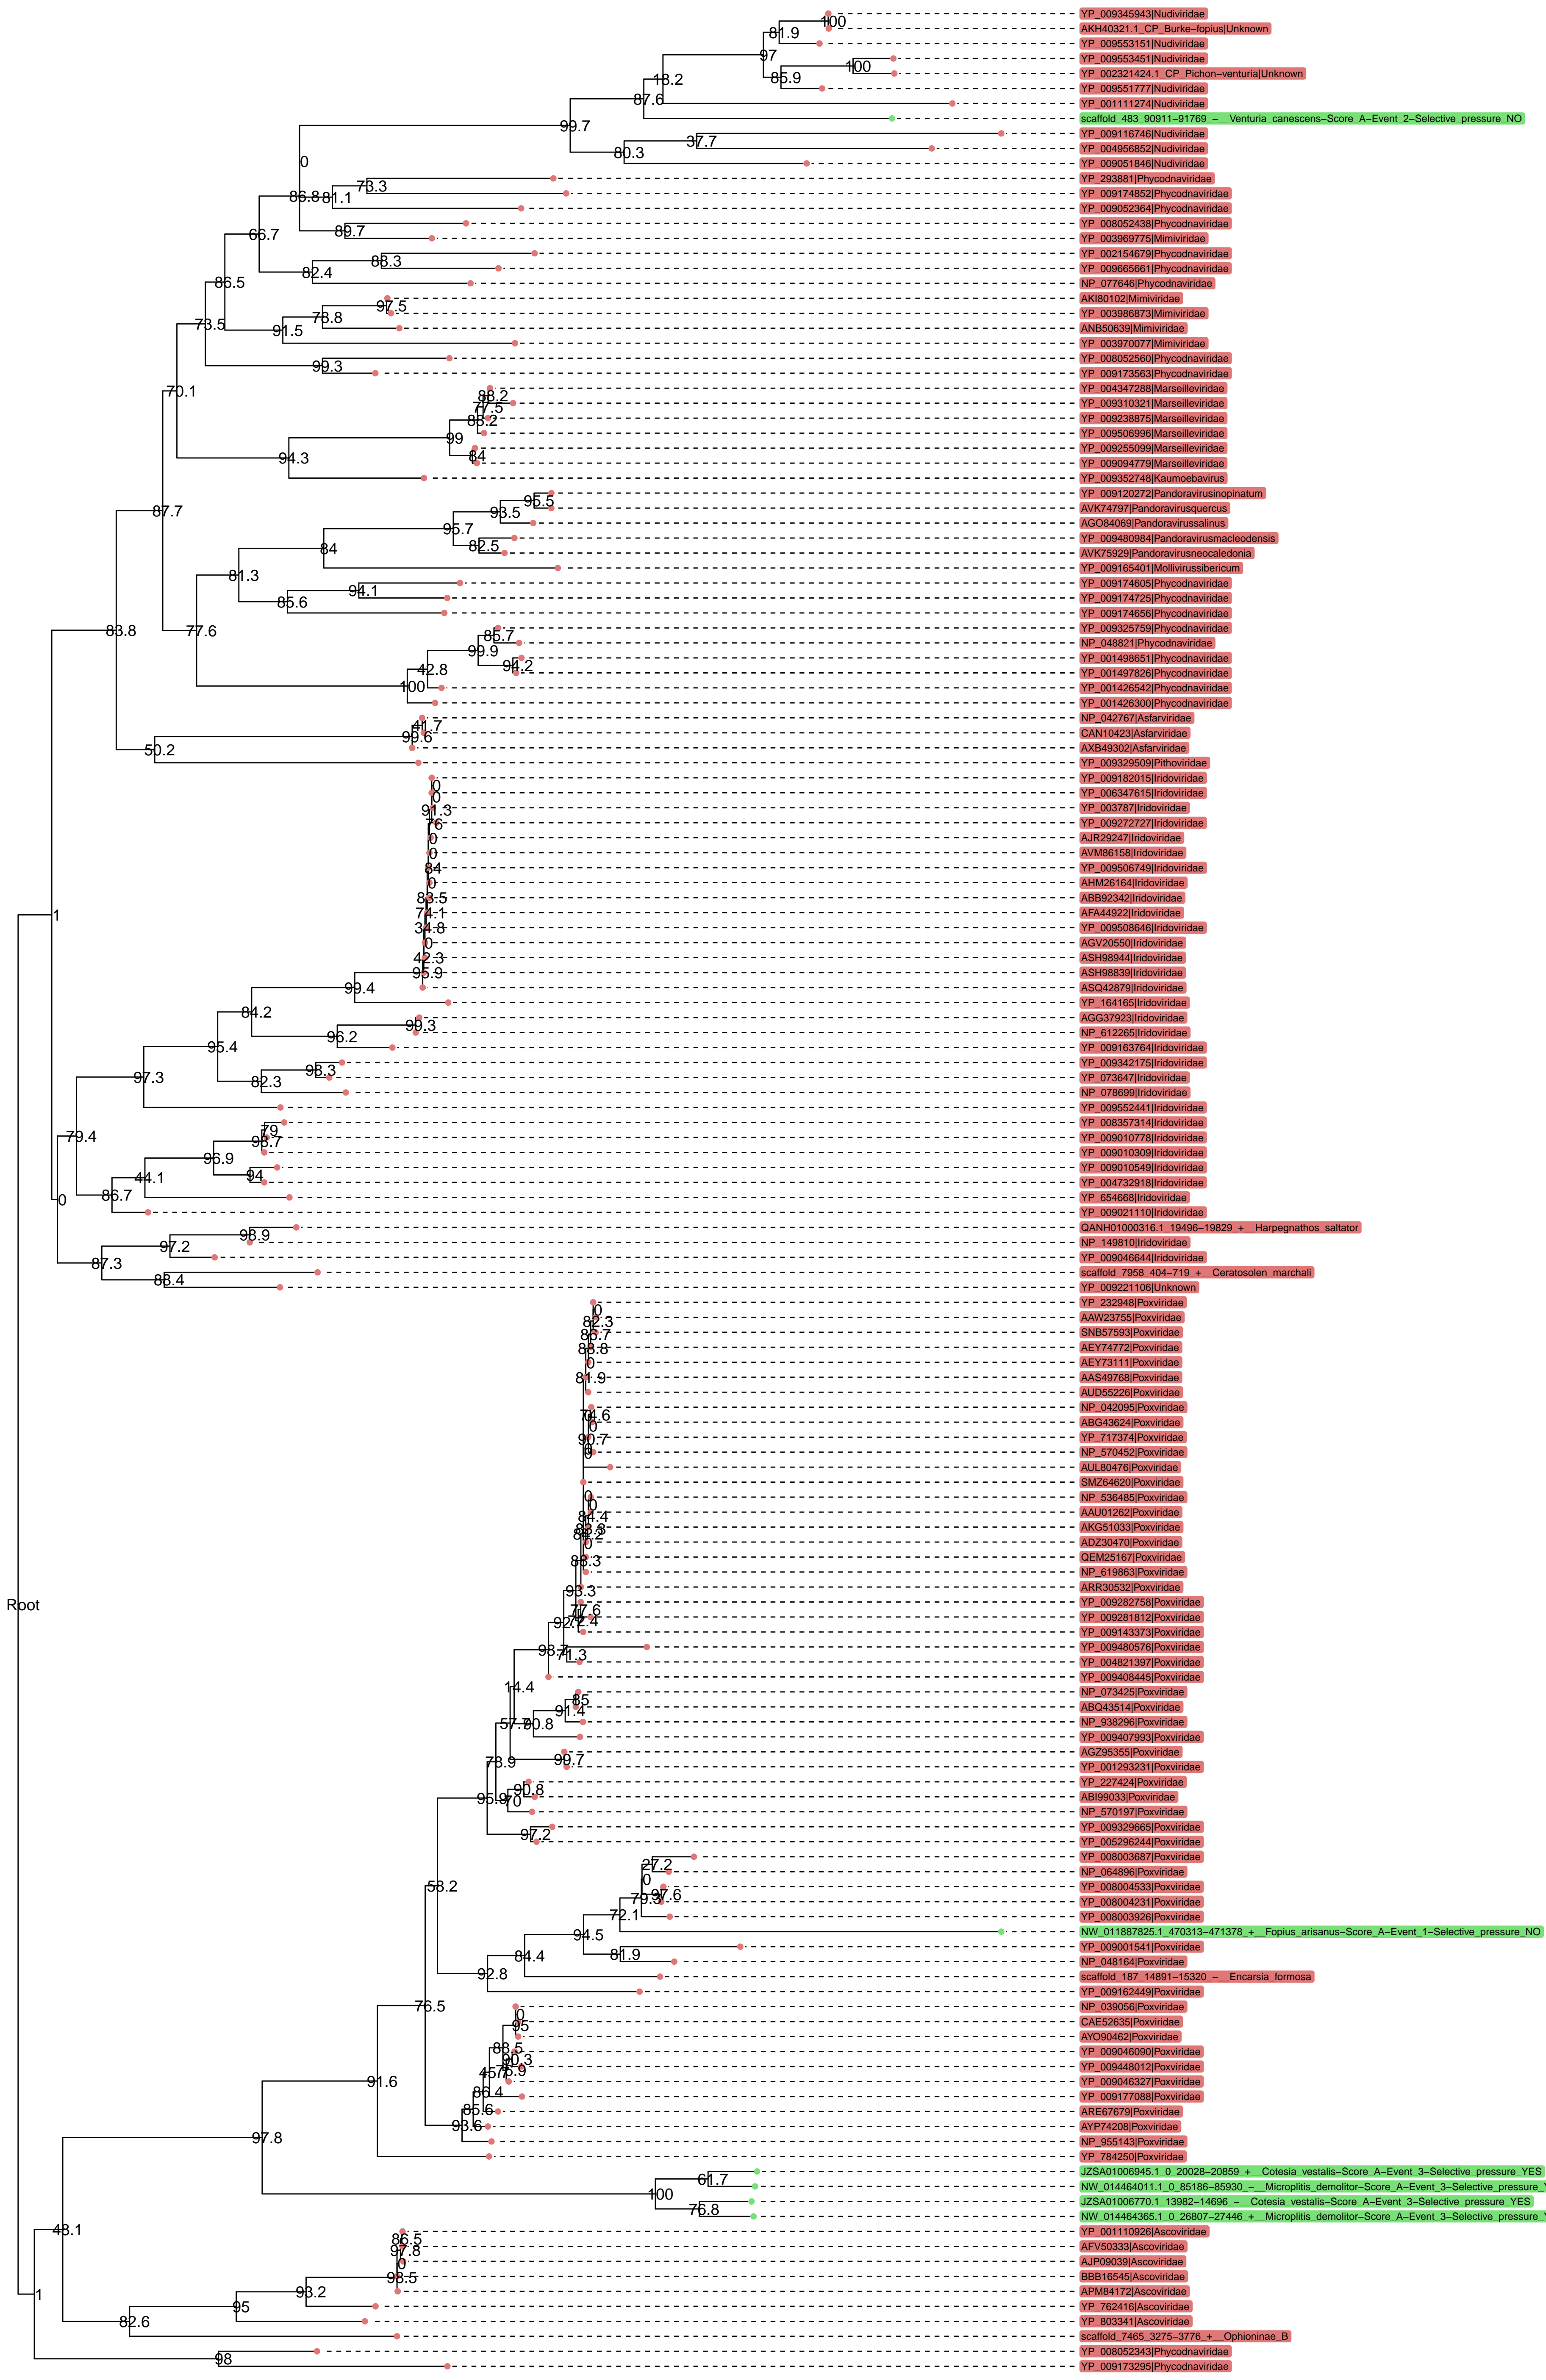

Root

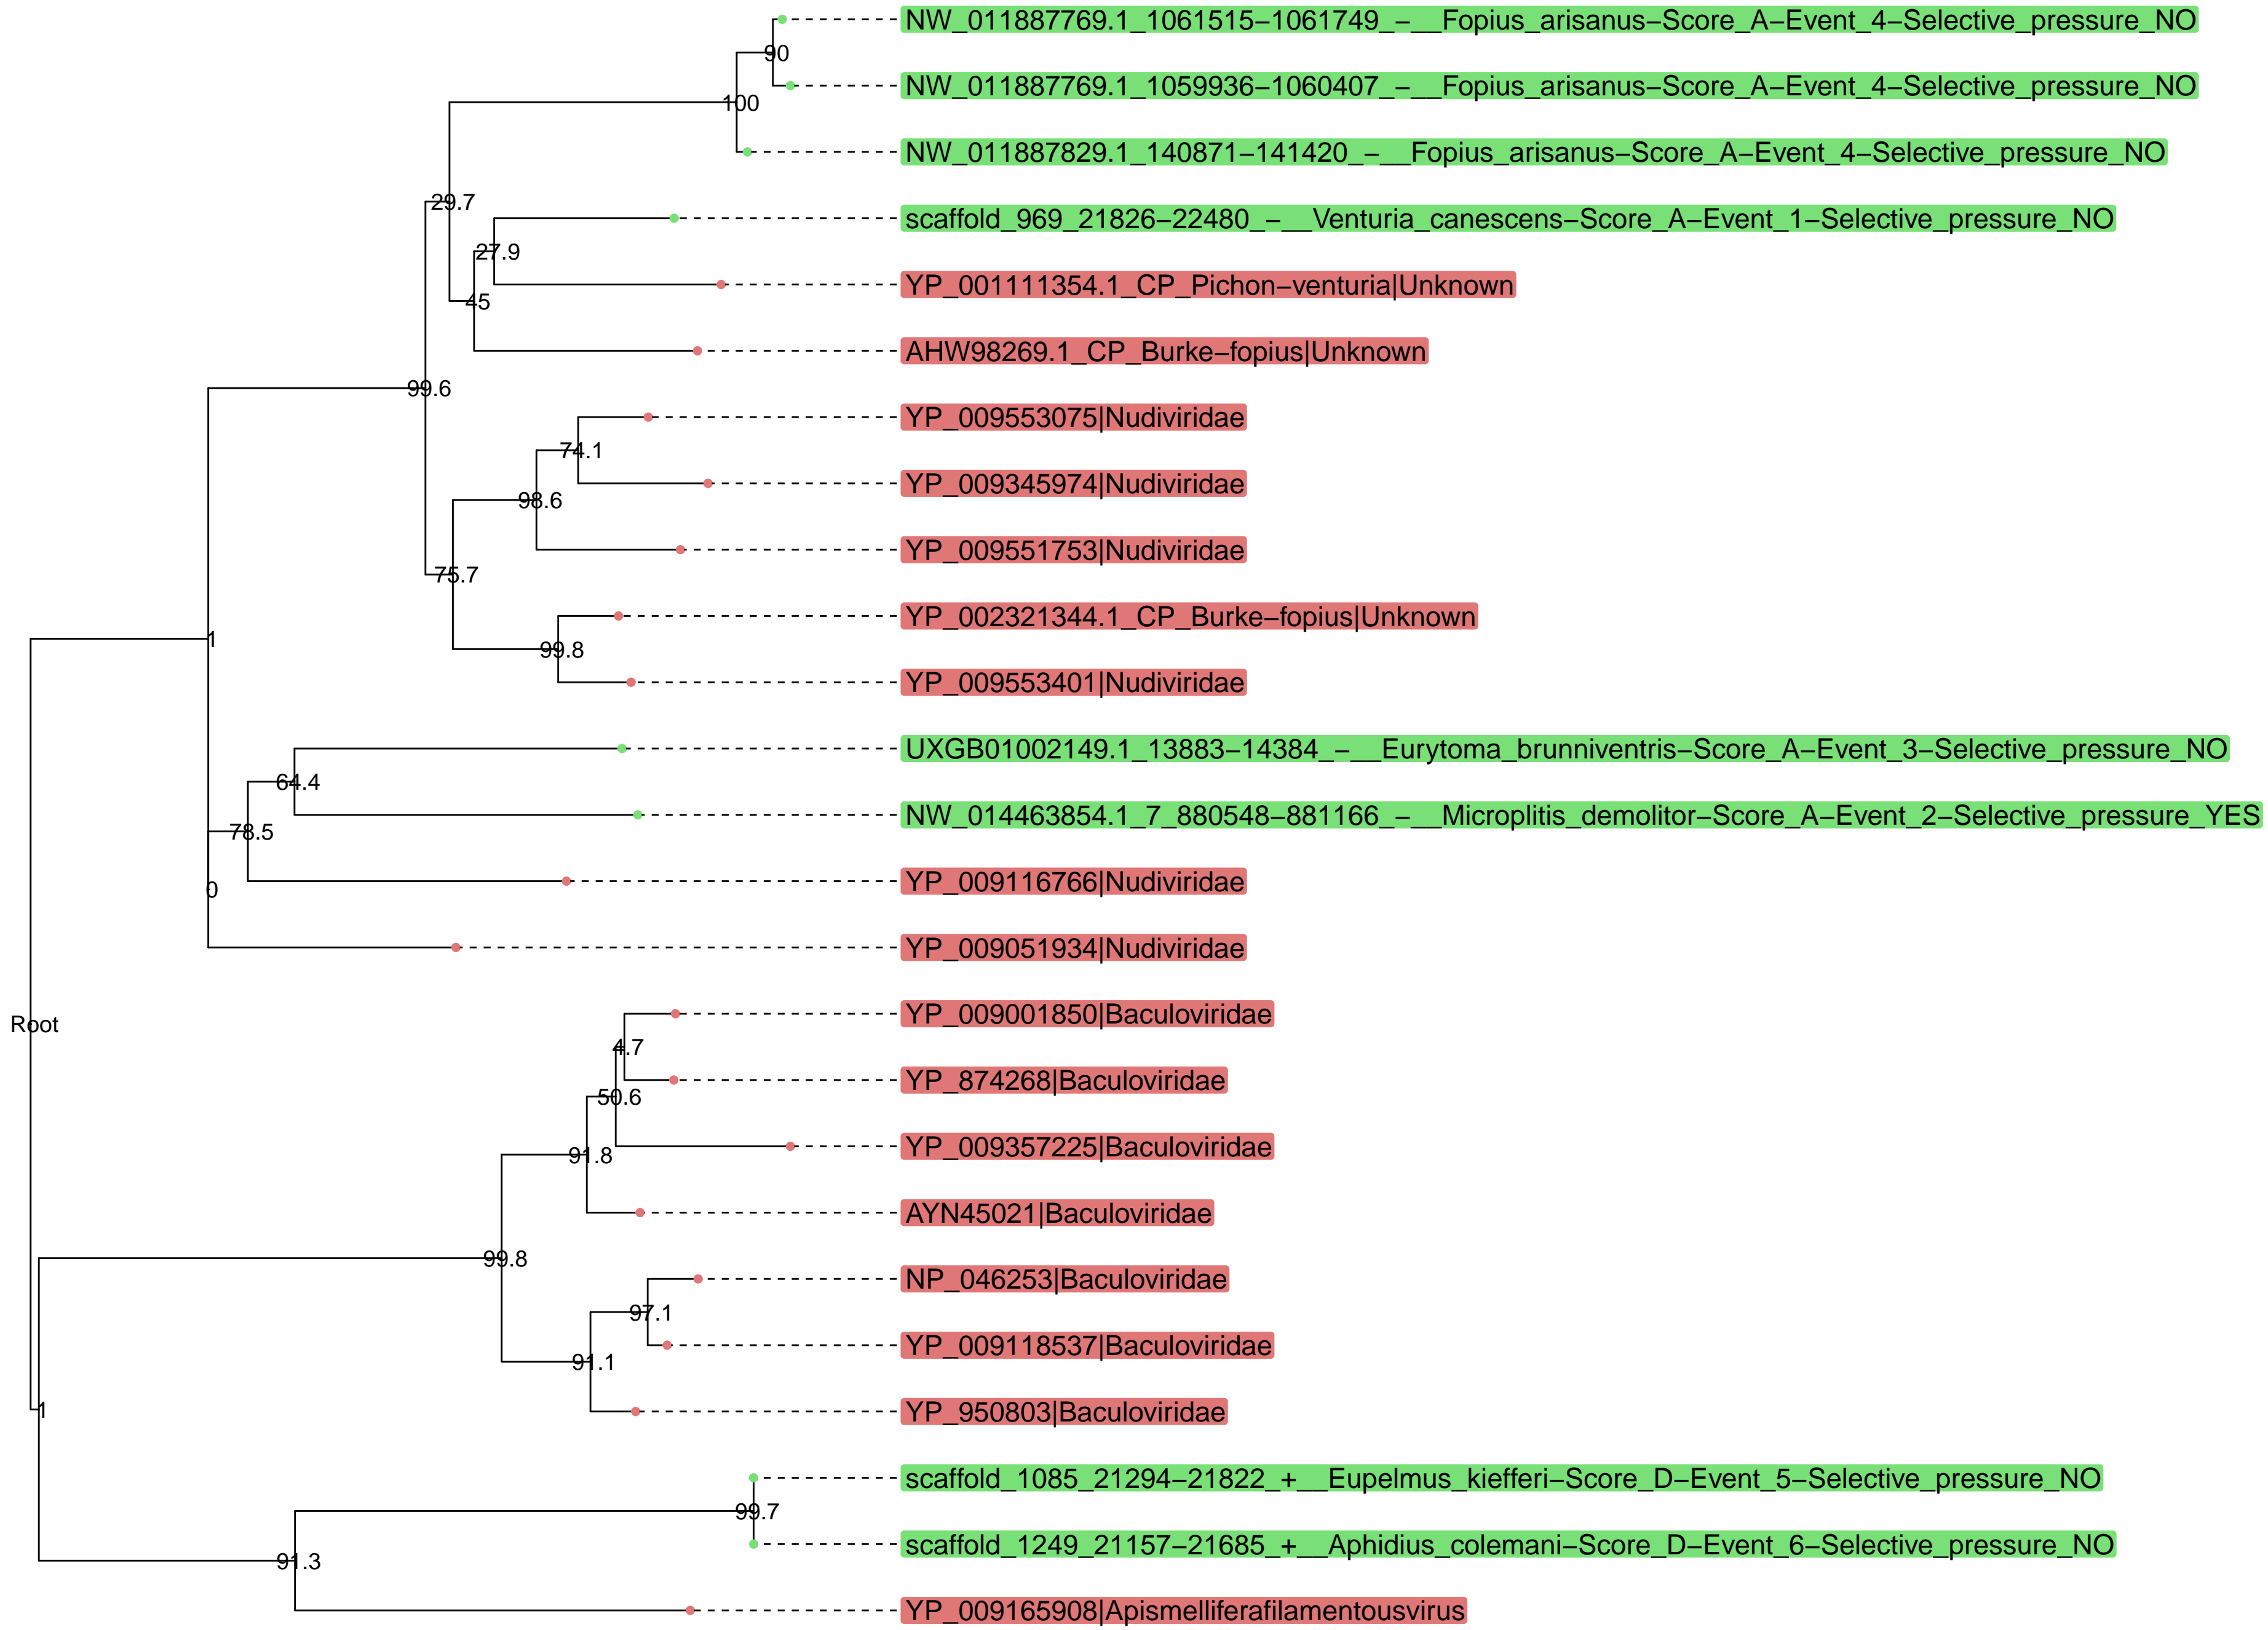

Cluster469 – families involved : ['Nudiviridae'] – putative protein : ['Ac146-like protein']

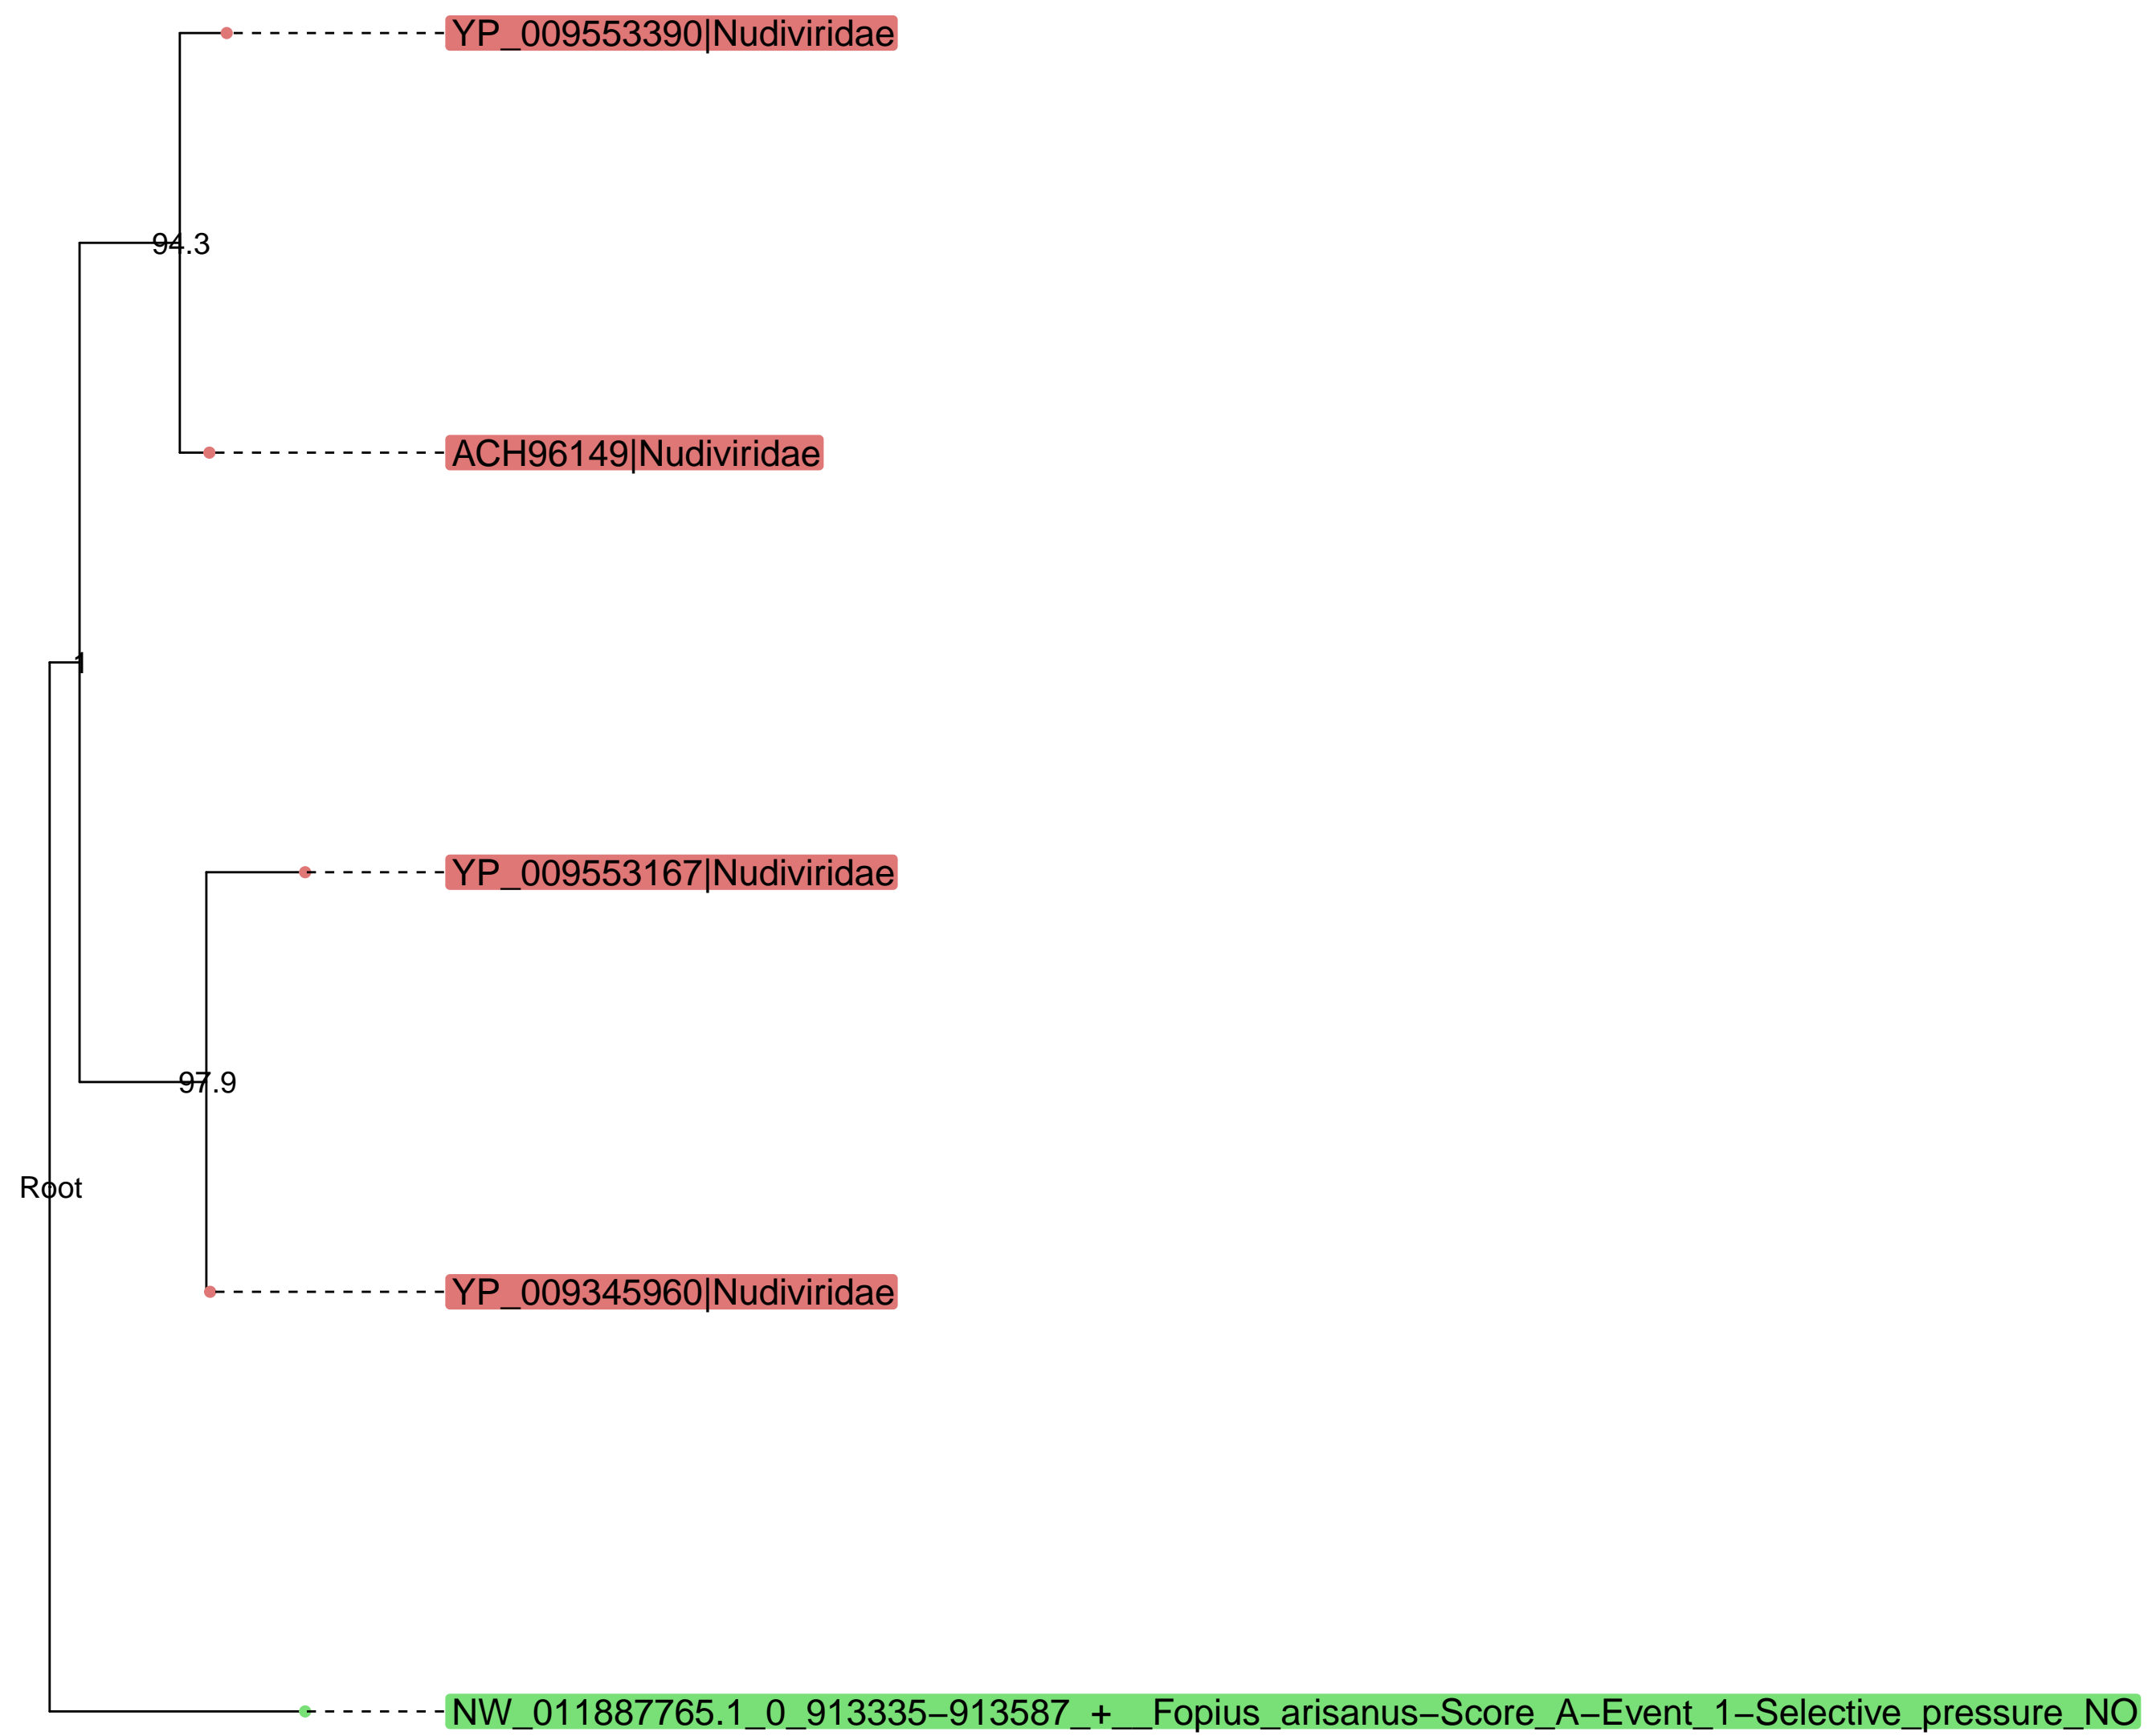

Cluster4454 – families involved : ['Nudiviridae'] – putative protein : ['GrBNV\_gp36-like protein']

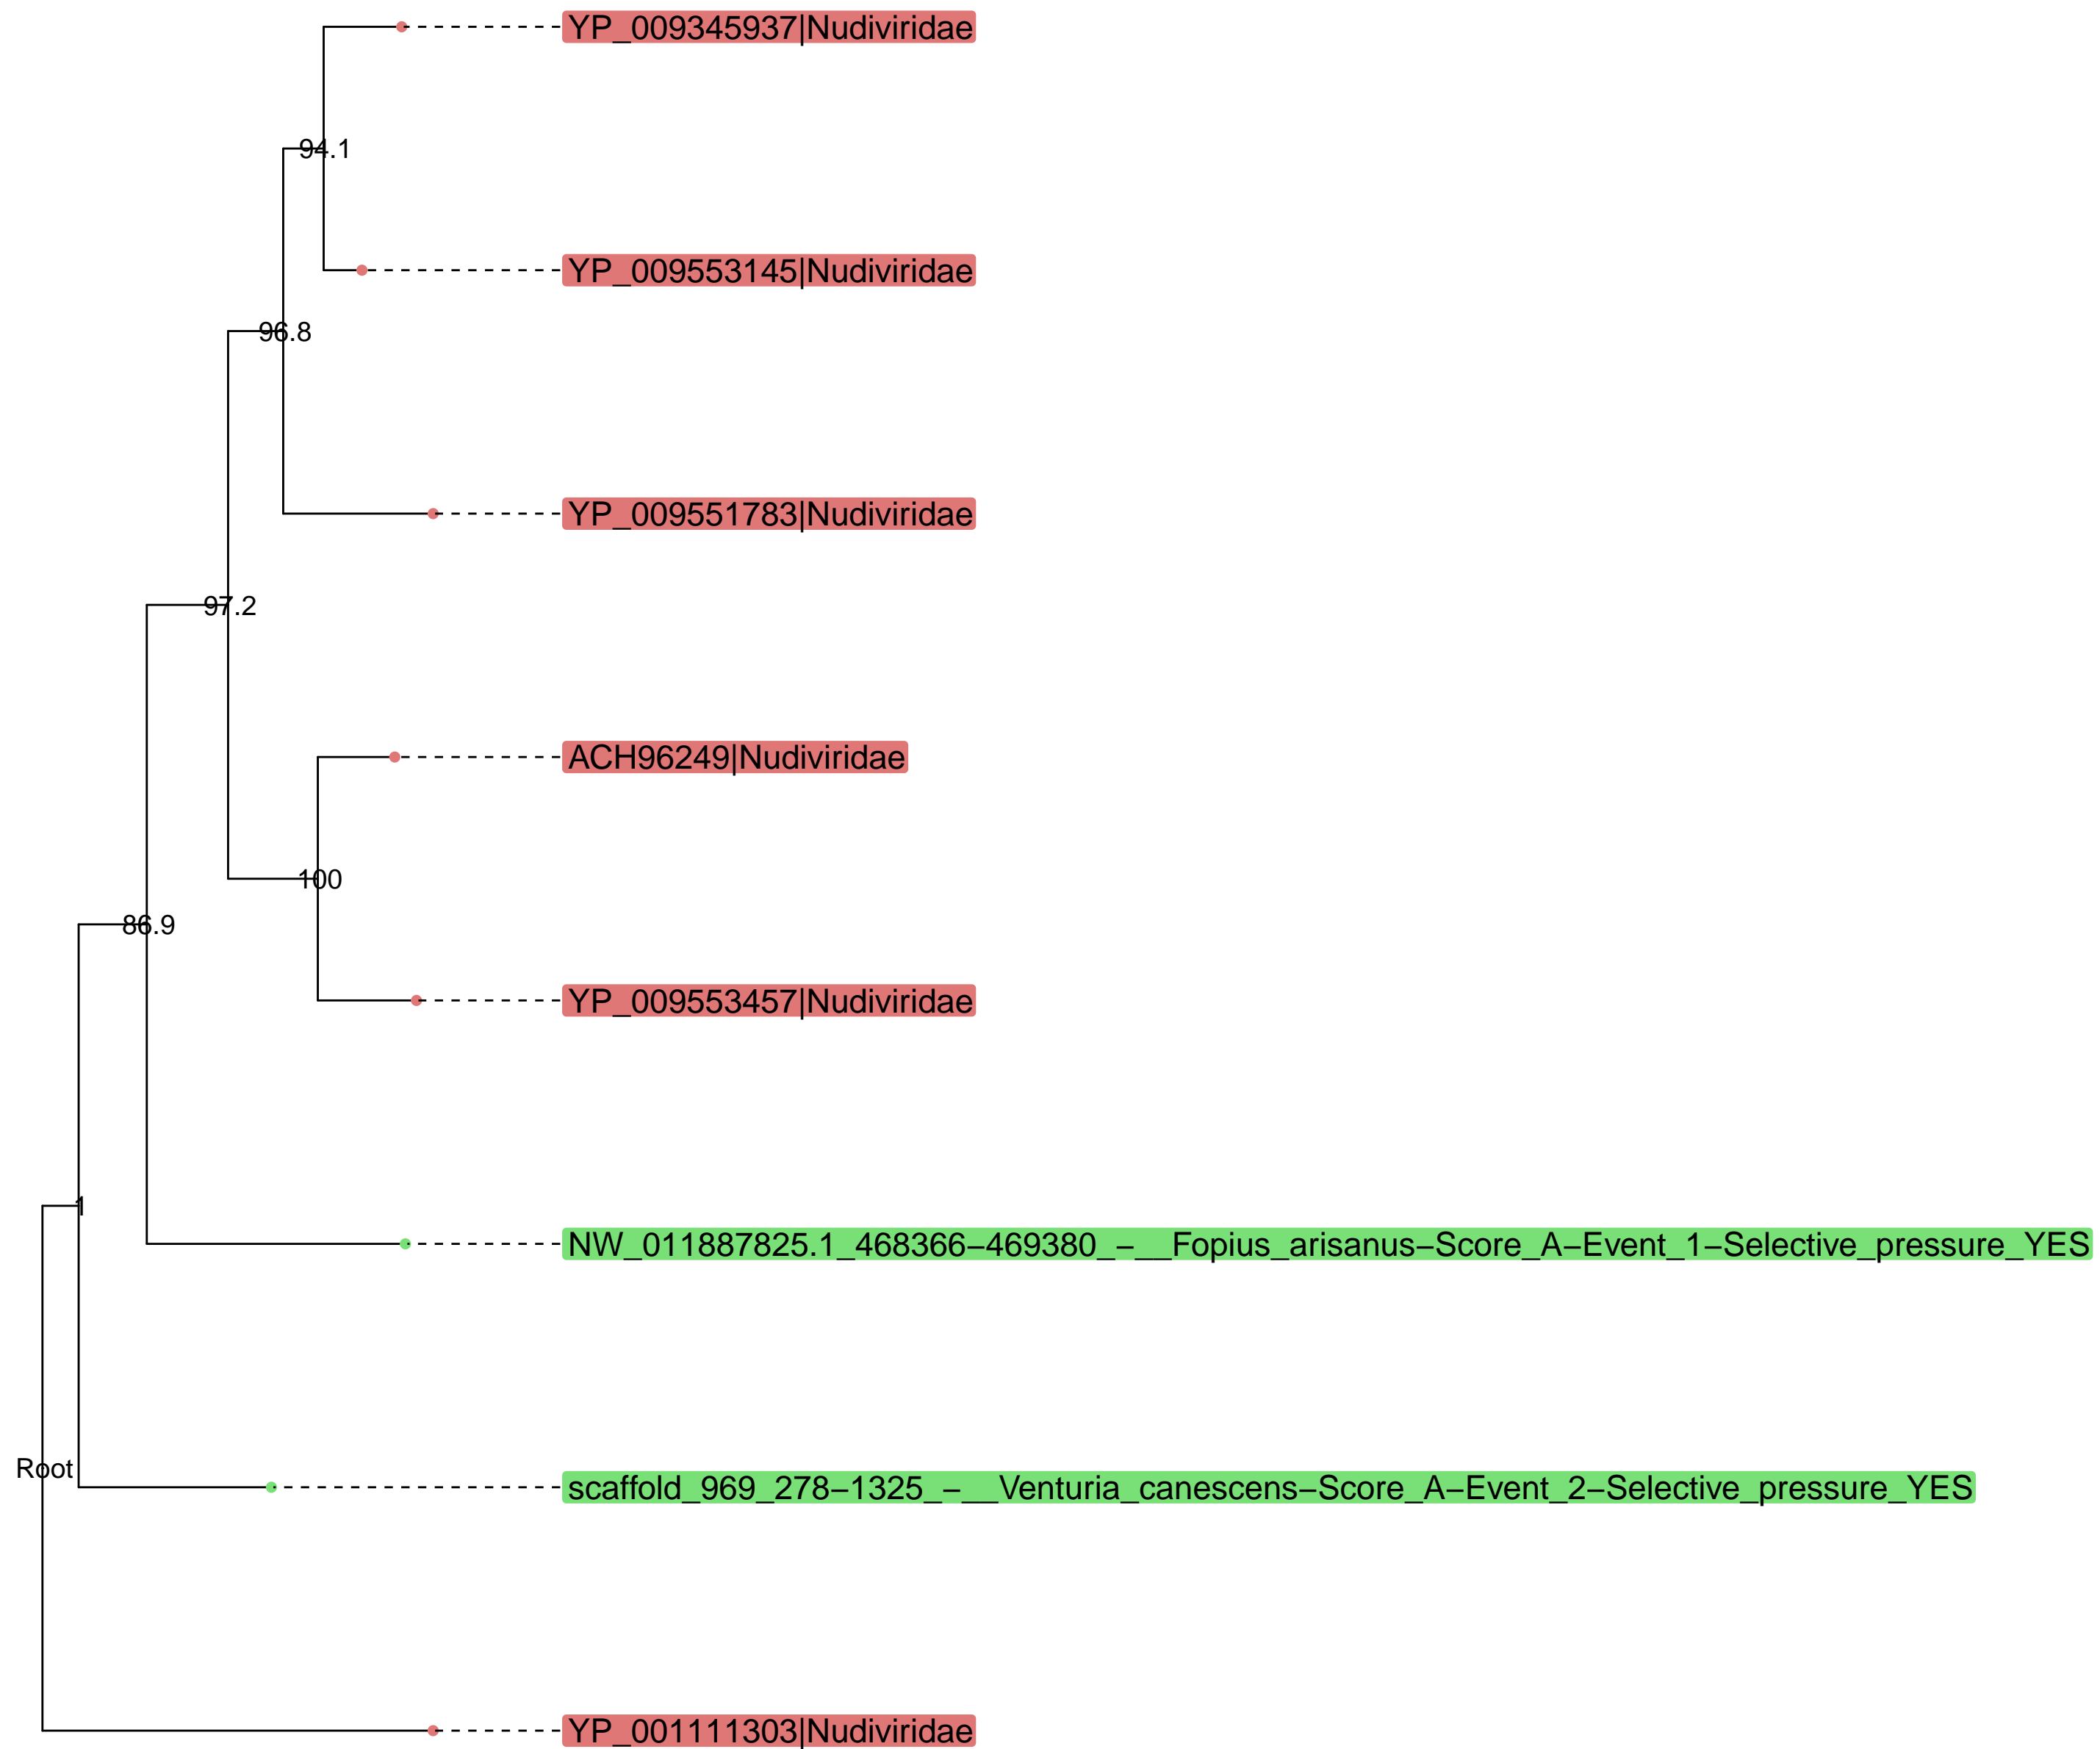

Cluster3912 – families involved : ['Nudiviridae'] – putative protein : ['ACH96220.1 GrBNV gp28-like protein']

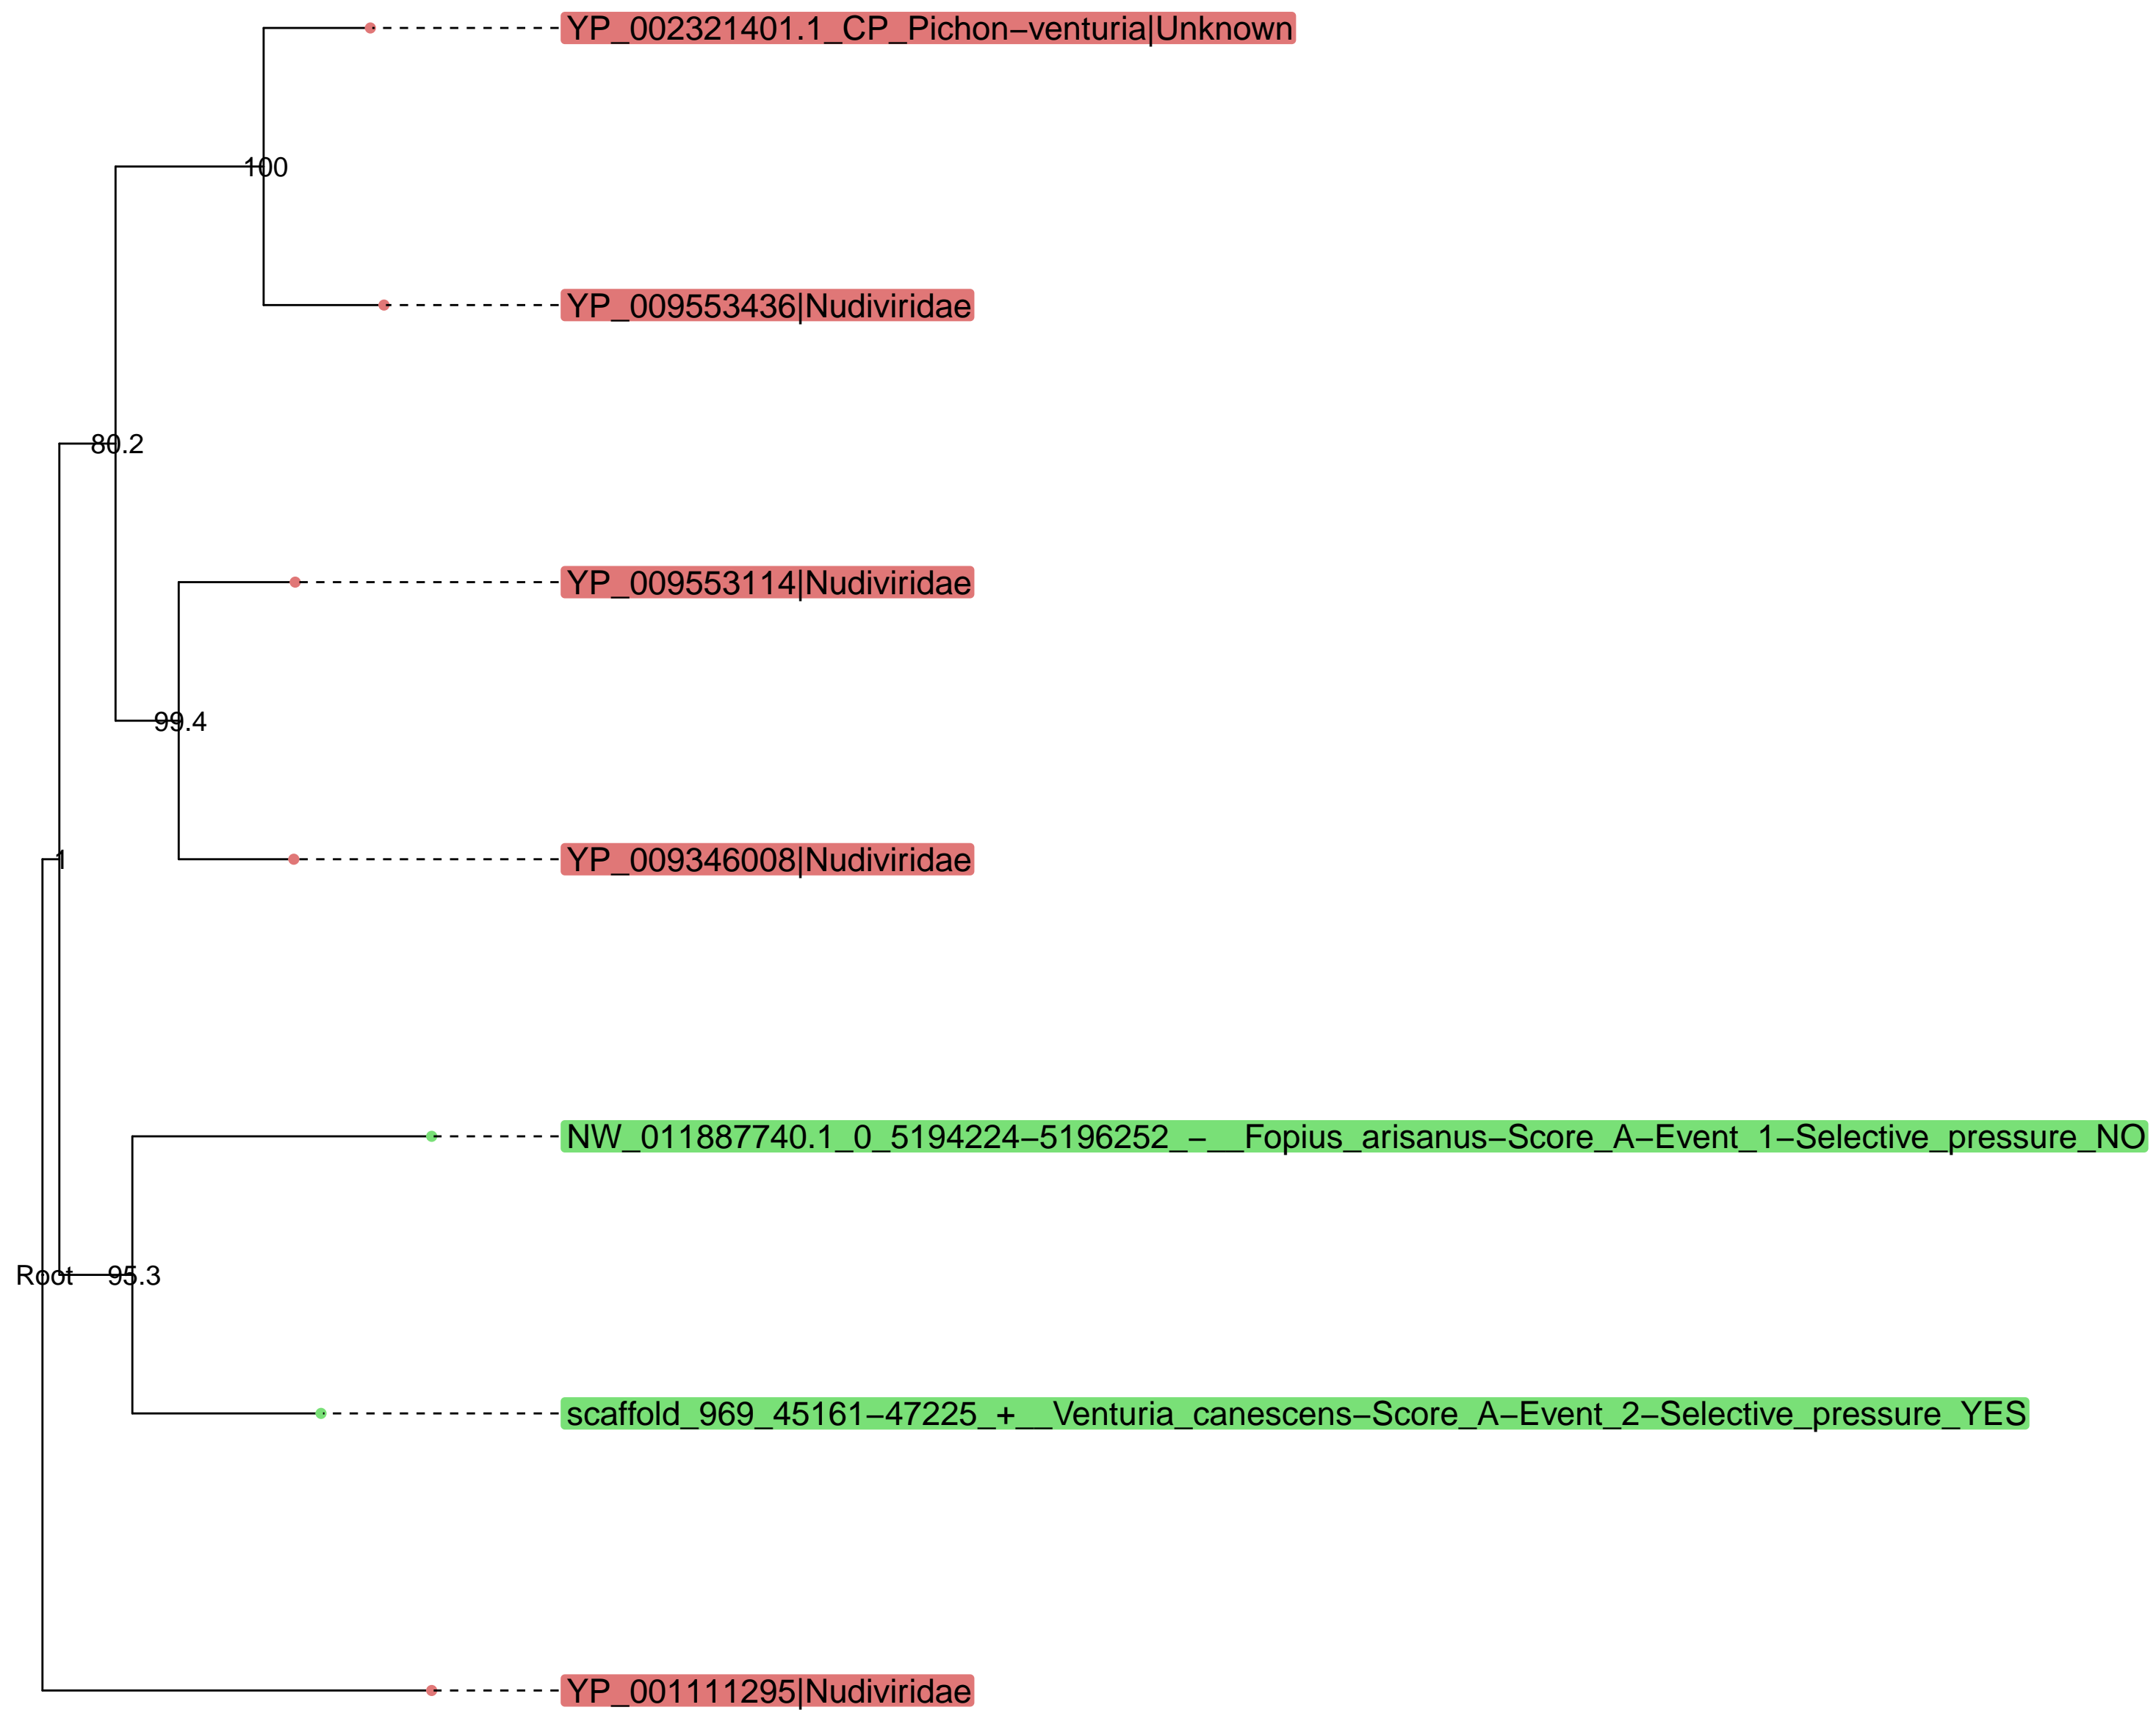

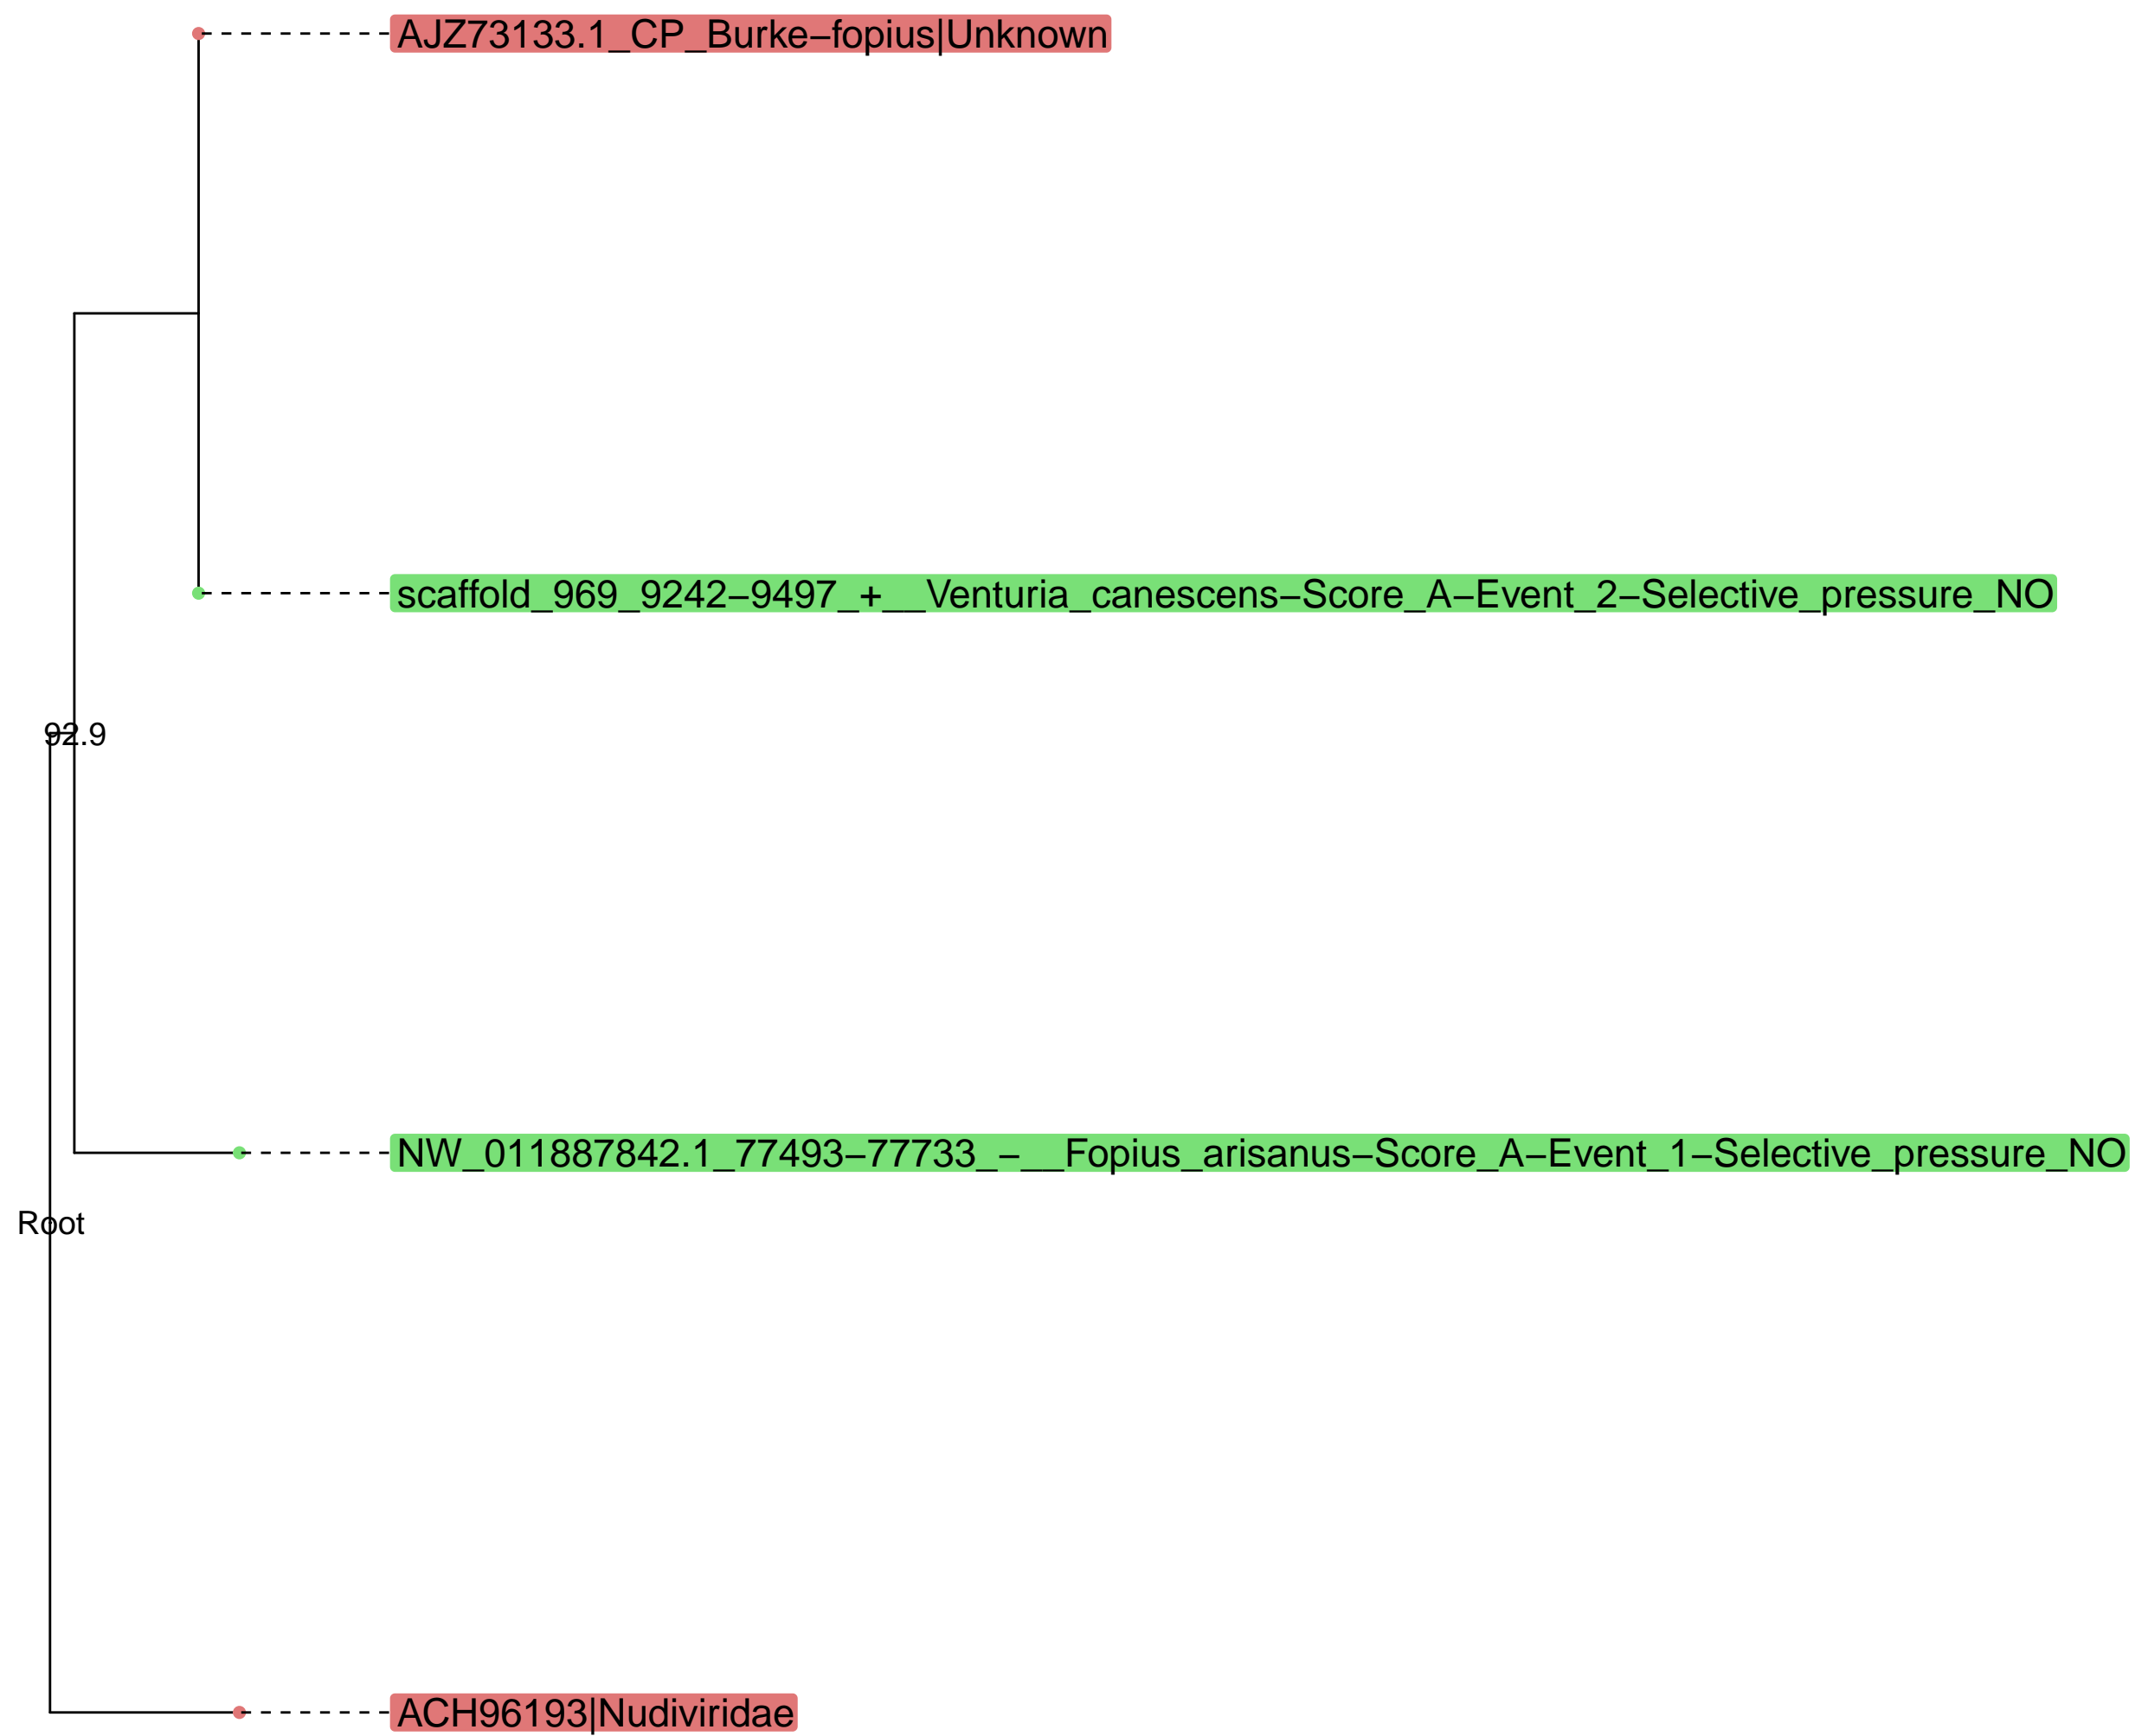

Cluster3232 – families involved : ['Nudiviridae'] – putative protein : ['ACH96148.1 GrBNV gp67-like protein']

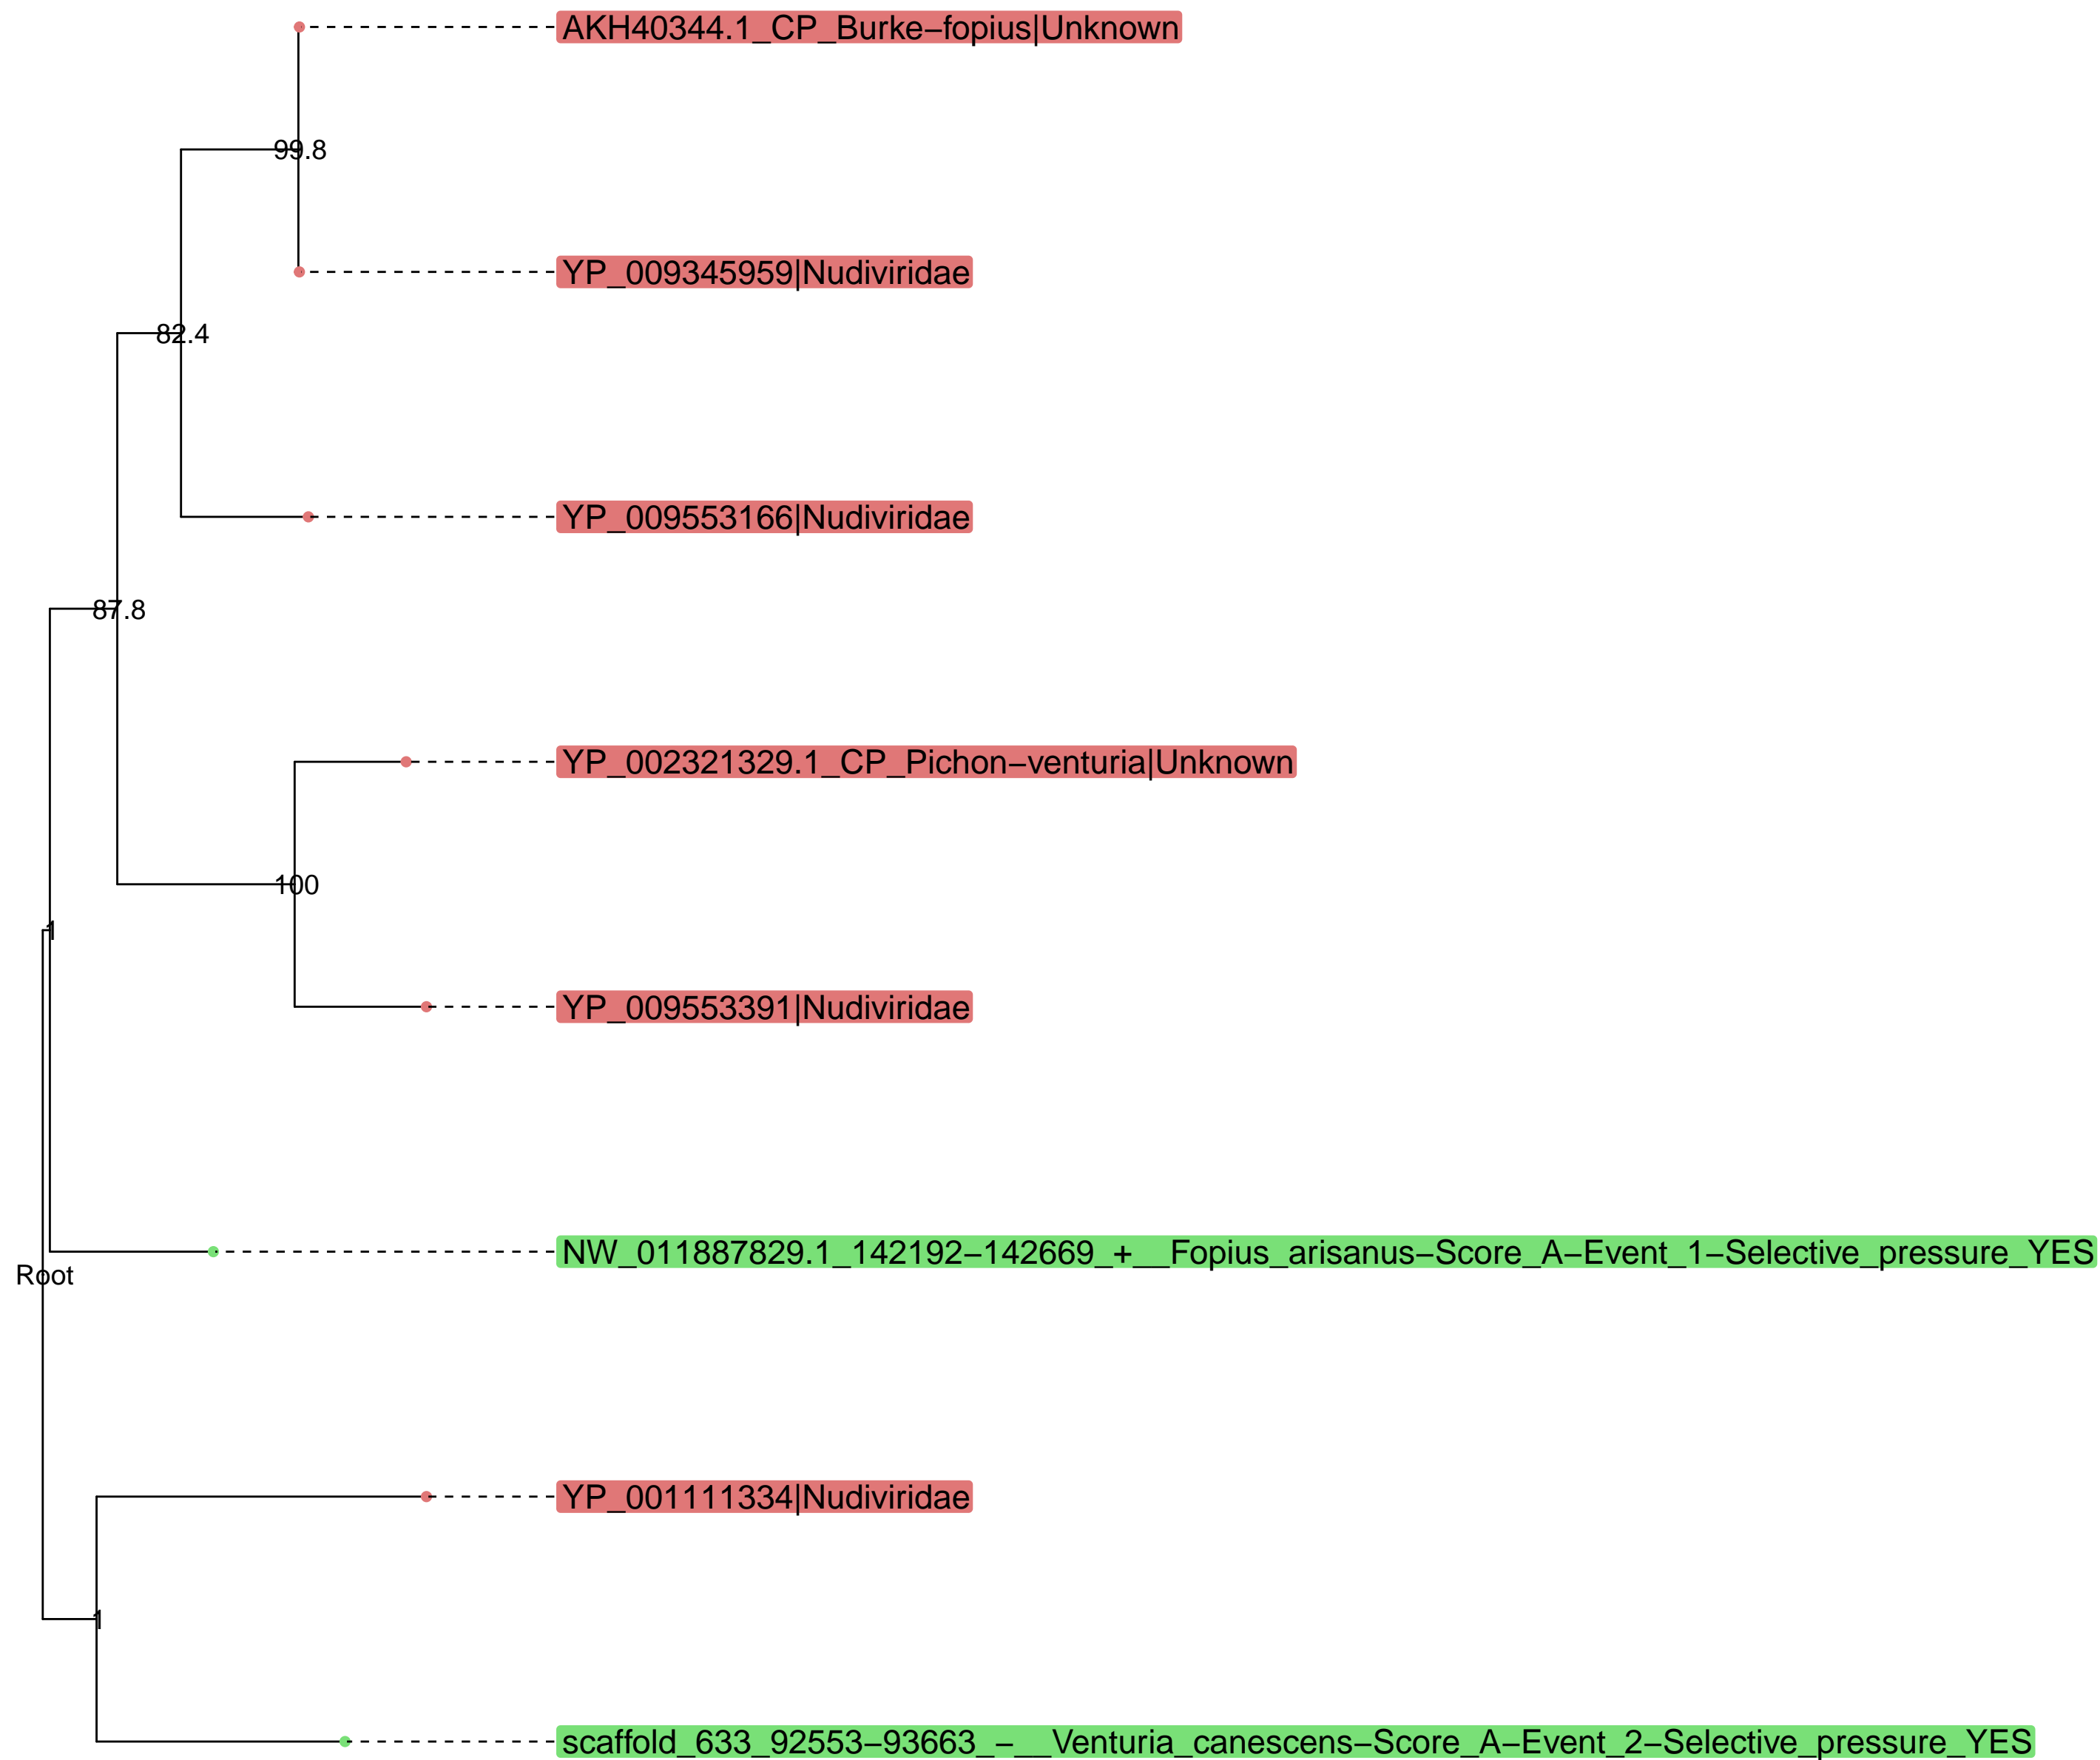



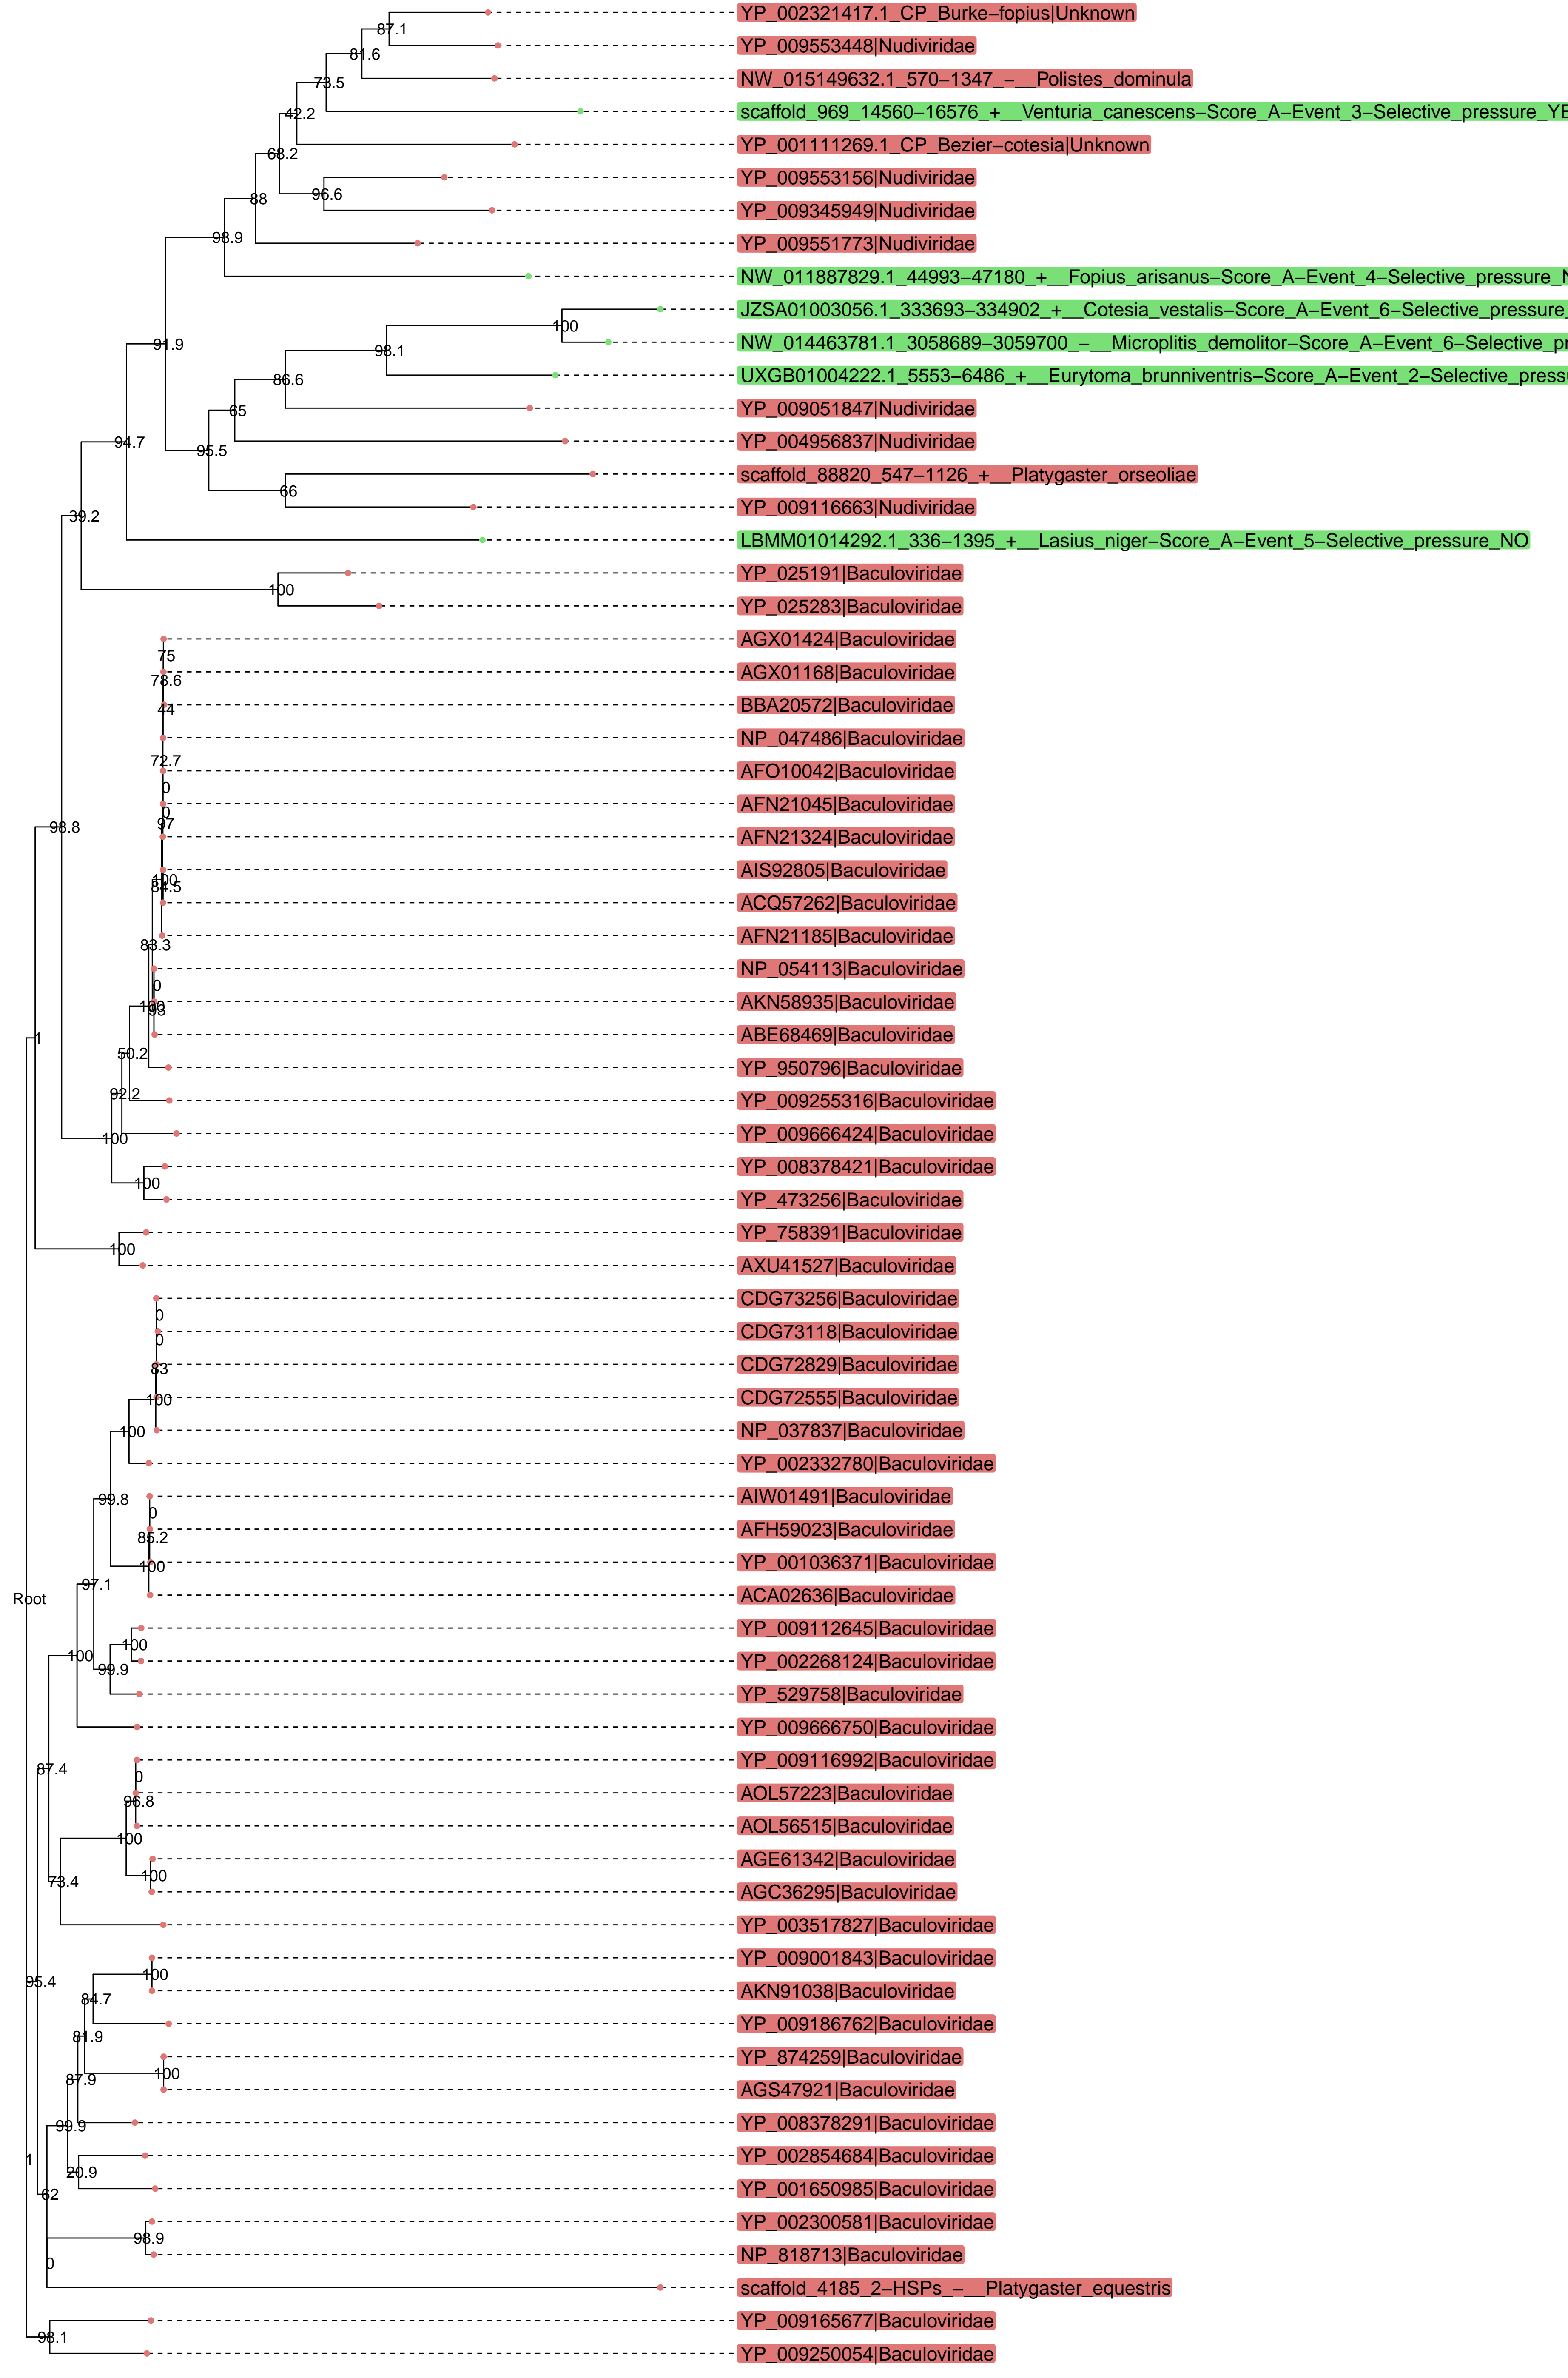

Cluster3072 – families involved : ['Nudiviridae'] – putative protein : ['p47']

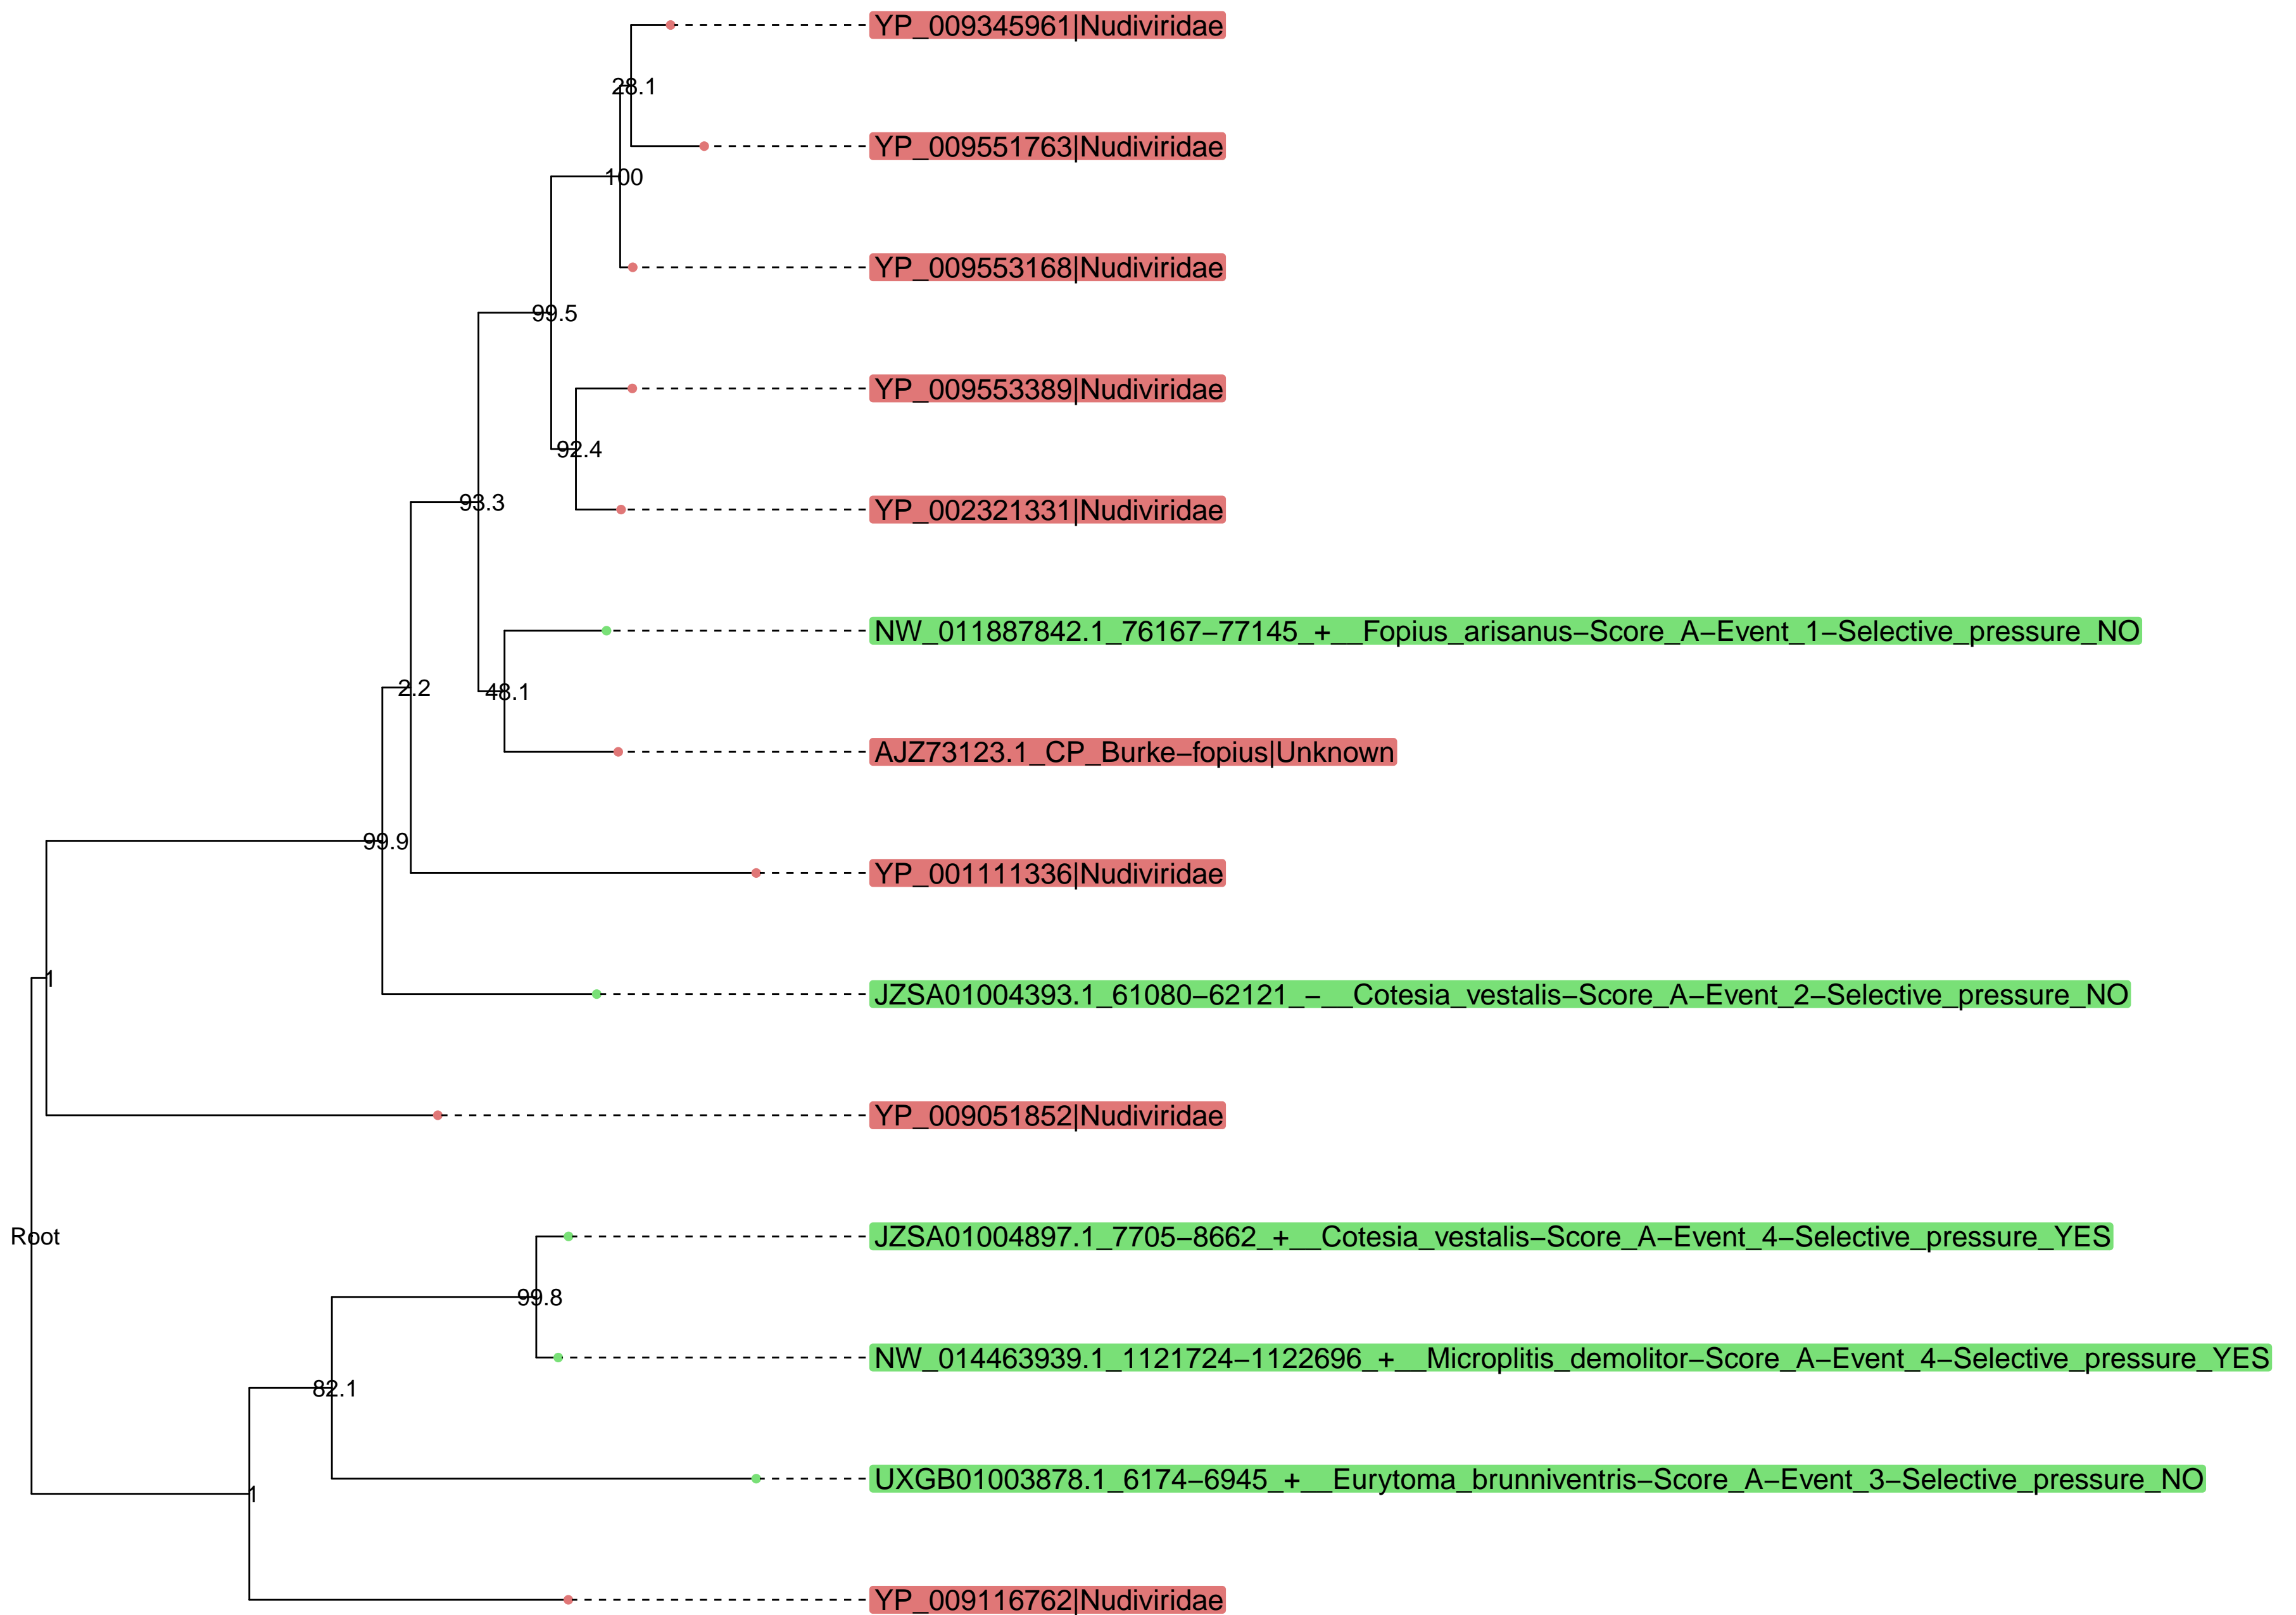

Cluster27187 – families involved : ['Nudiviridae'] – putative protein : ['GrBNV\_gp84-like protein']

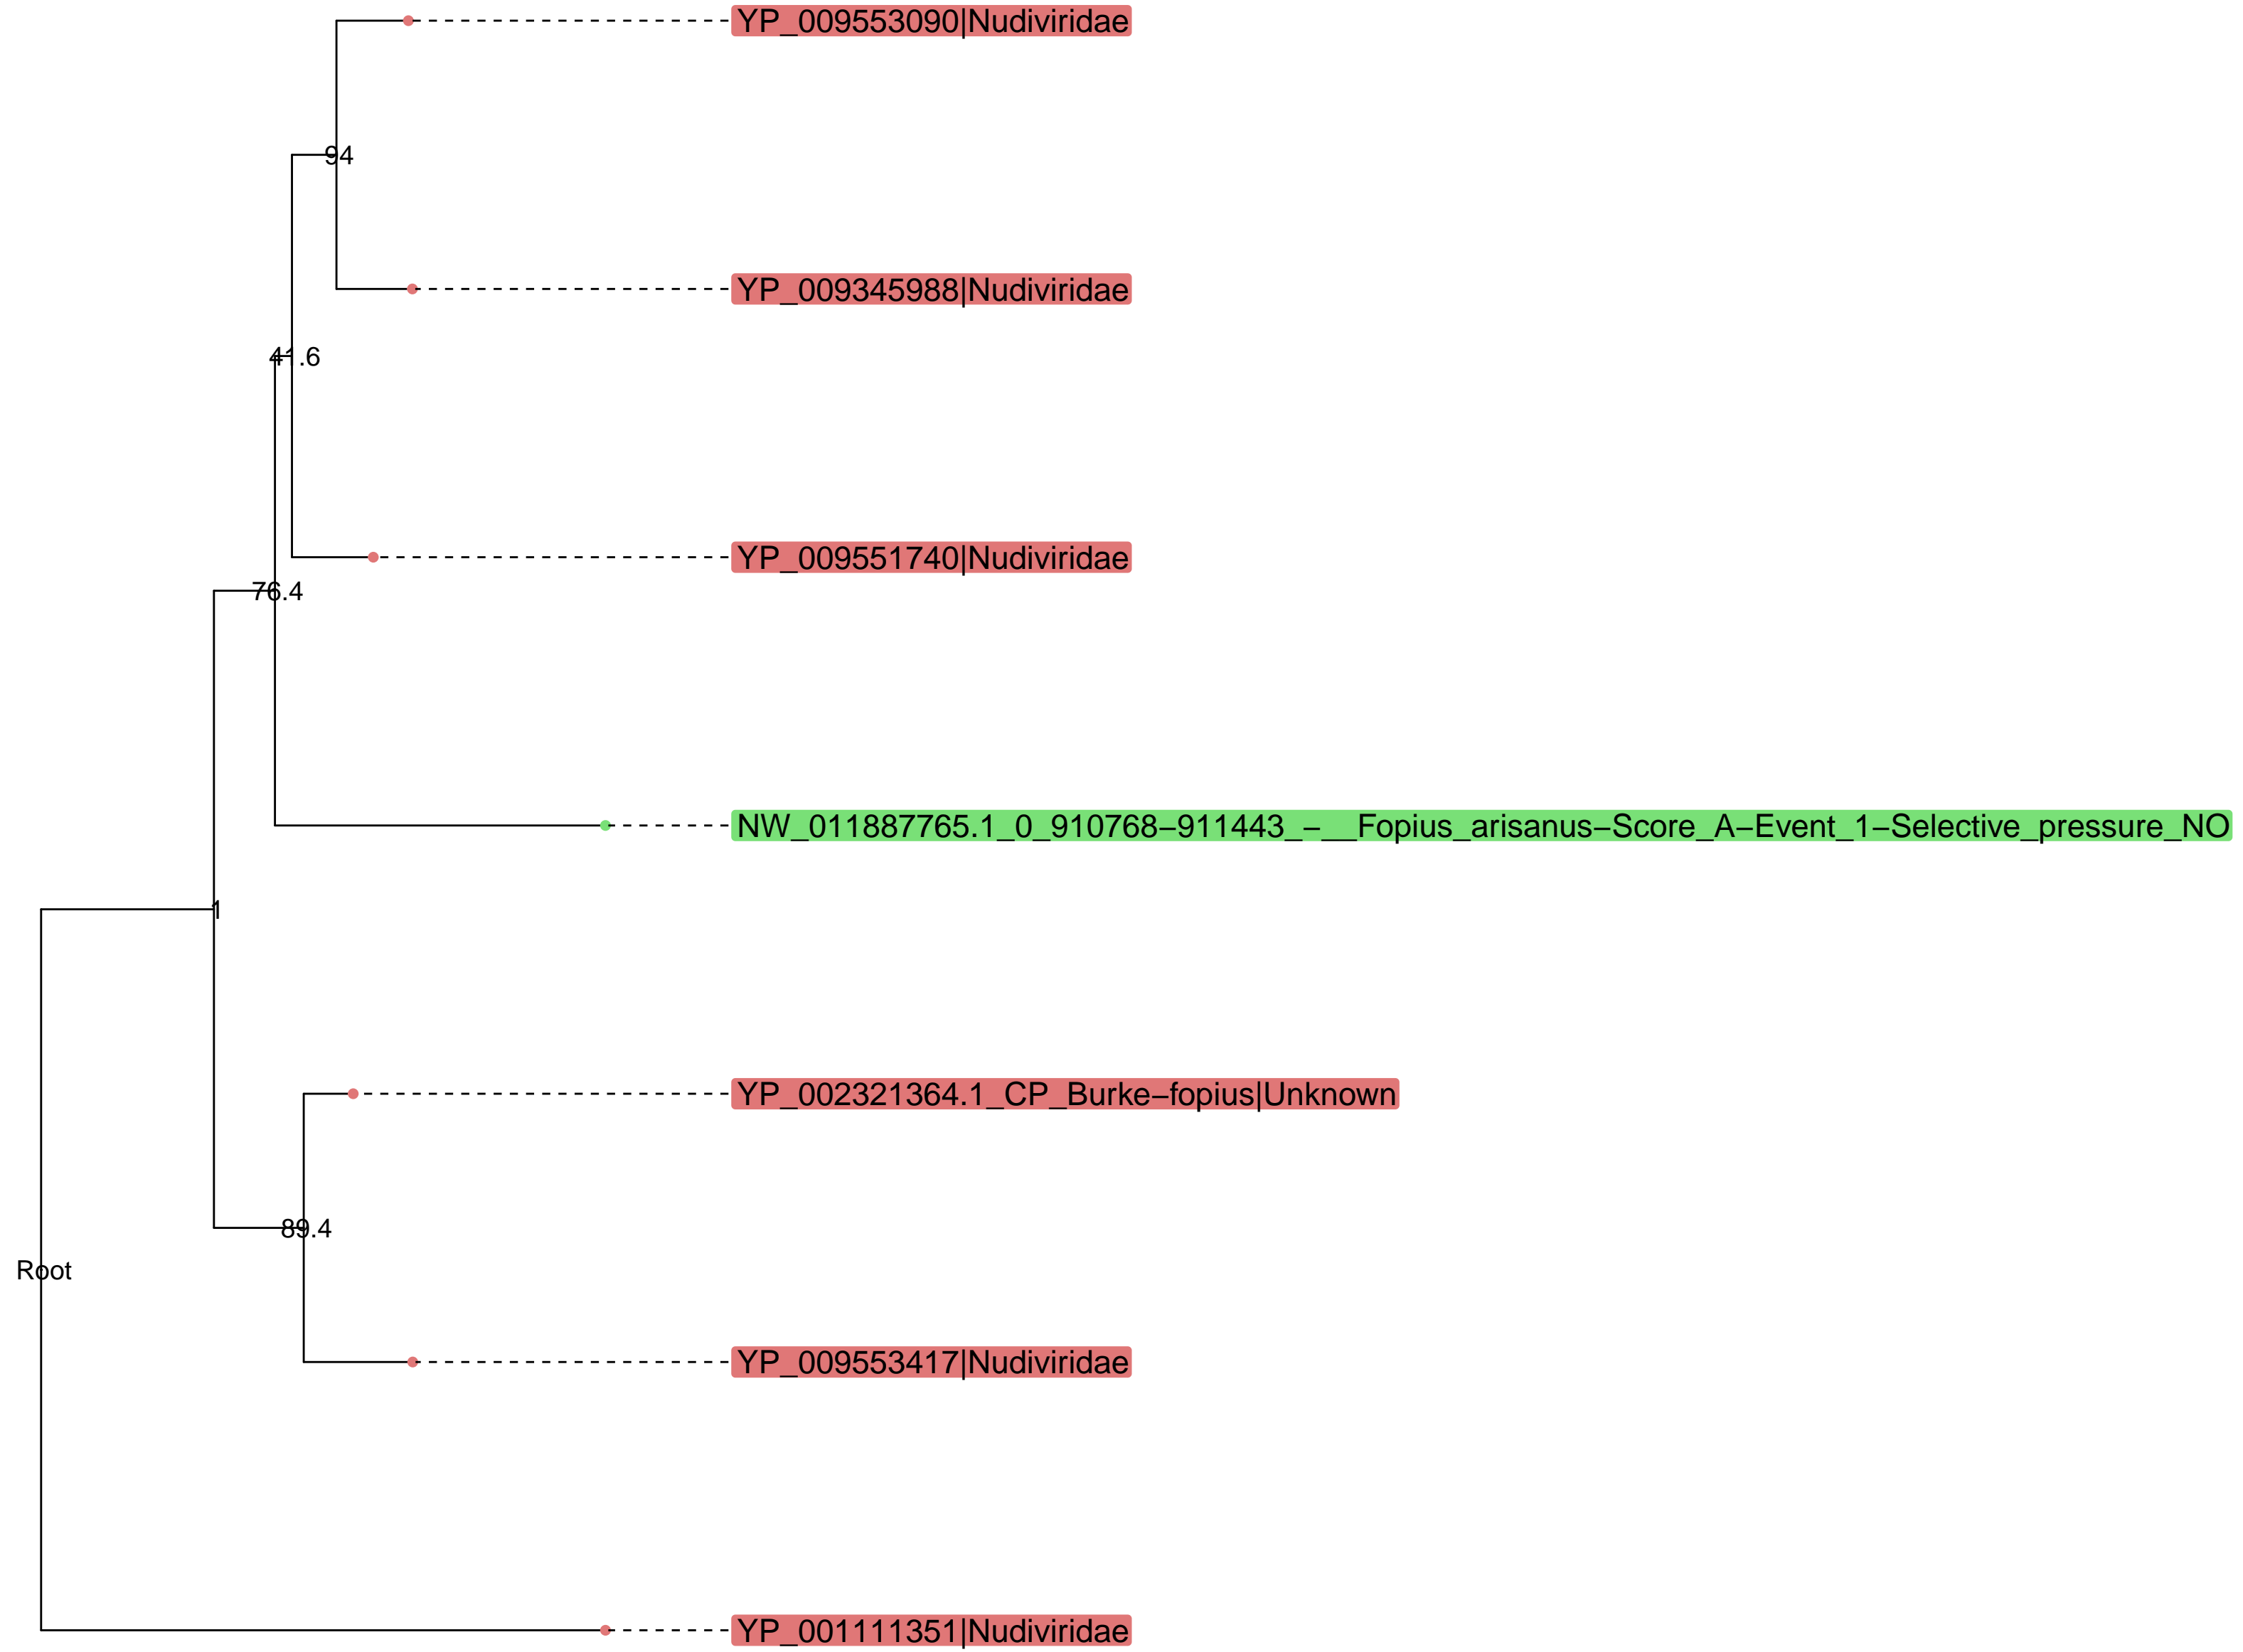

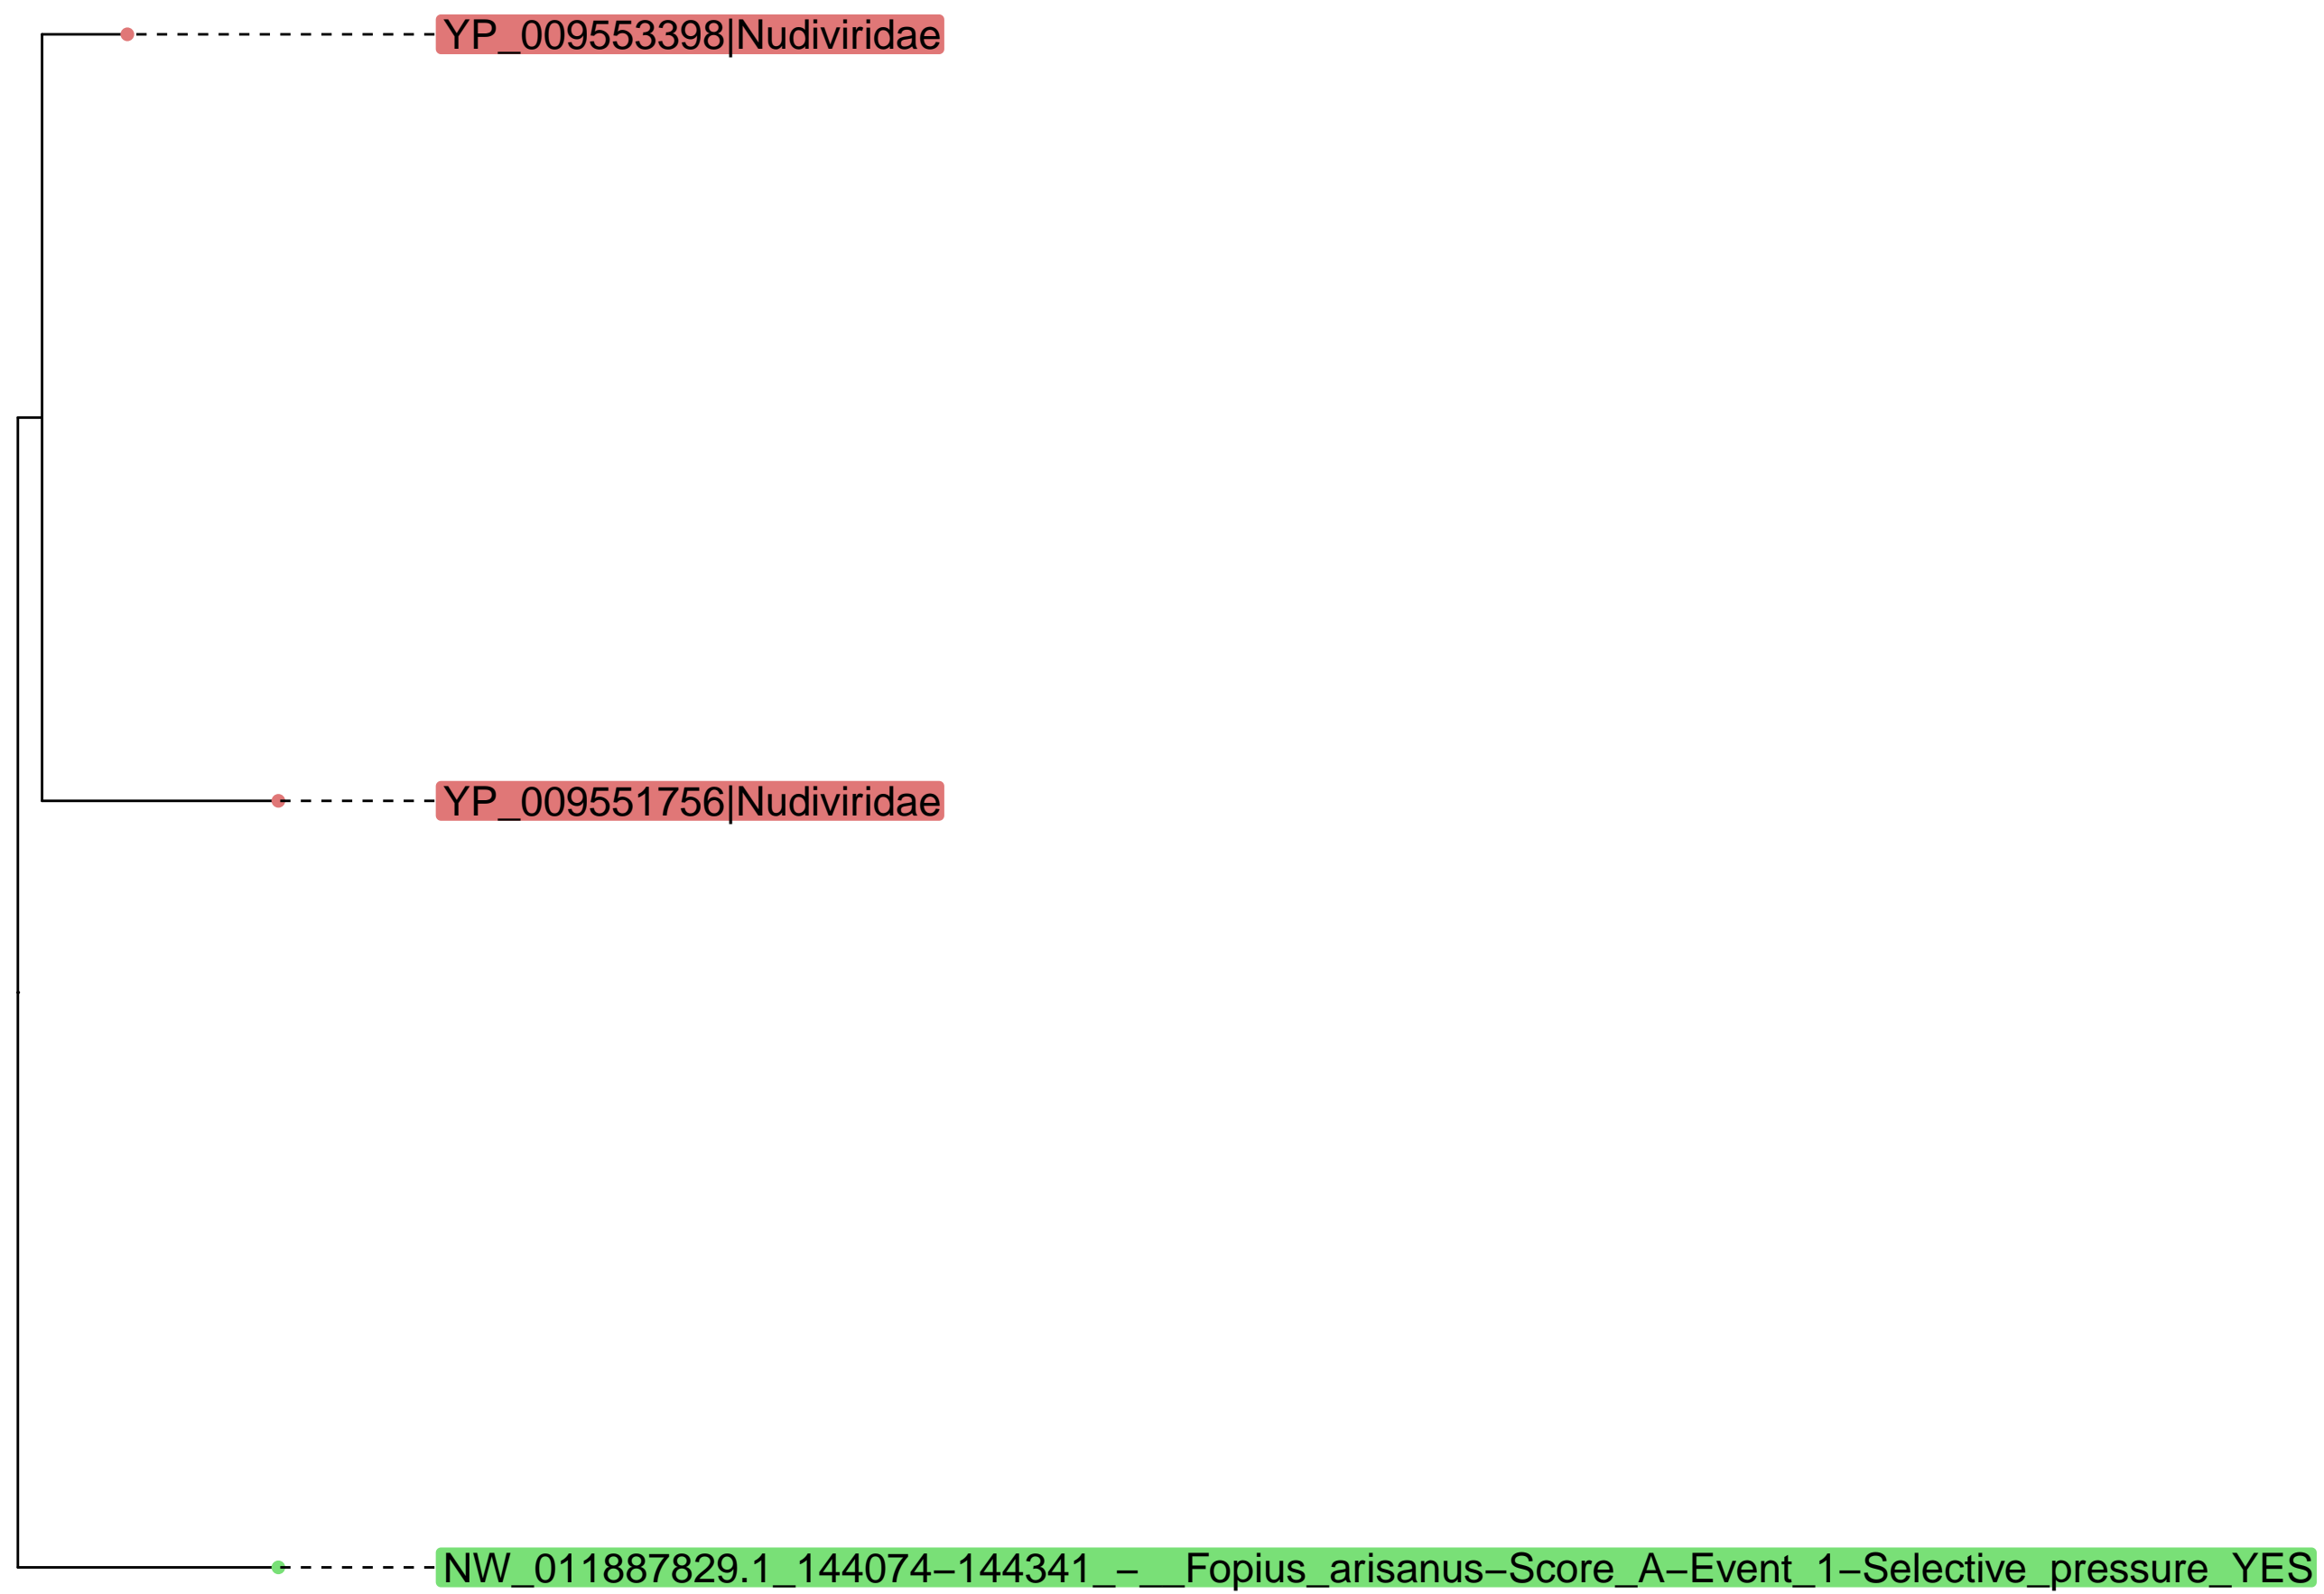

Cluster26 – families involved : ['Nudiviridae'] – putative protein : ['Ac81-like protein']

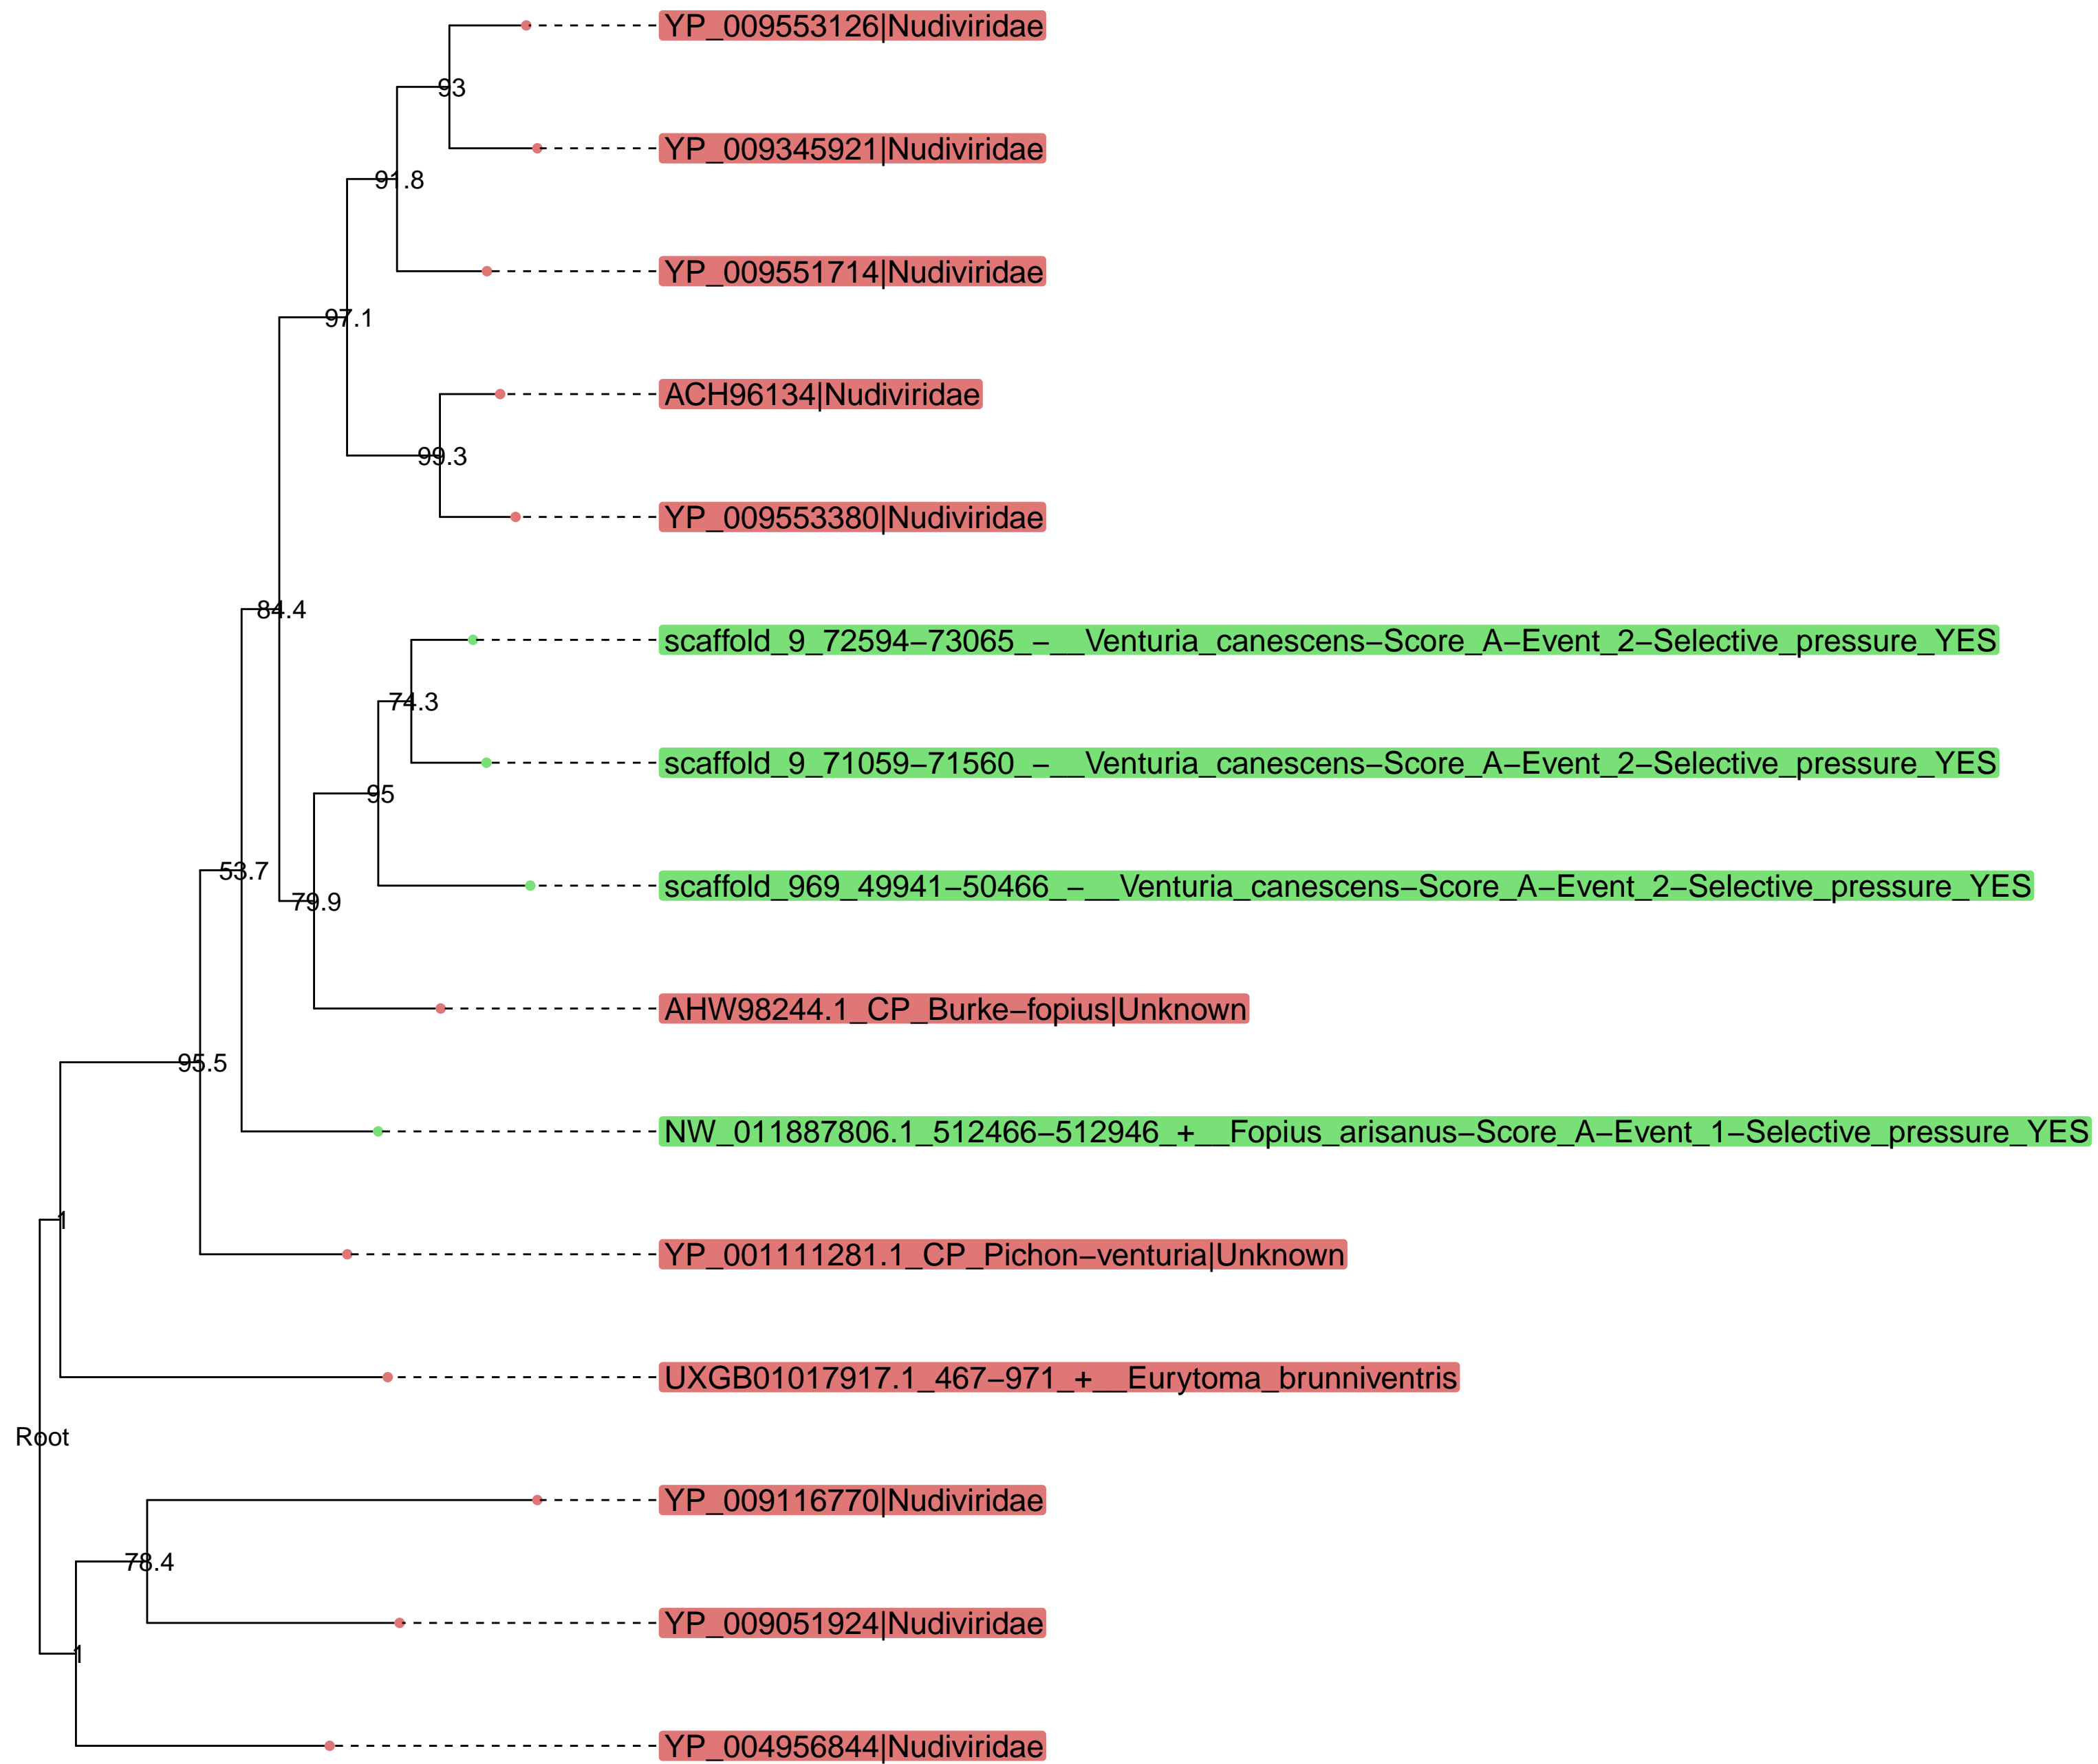

Cluster25942 – families involved : ['Nudiviridae'] – putative protein : ['ACH96225.1 OrNV gp095-like protein']

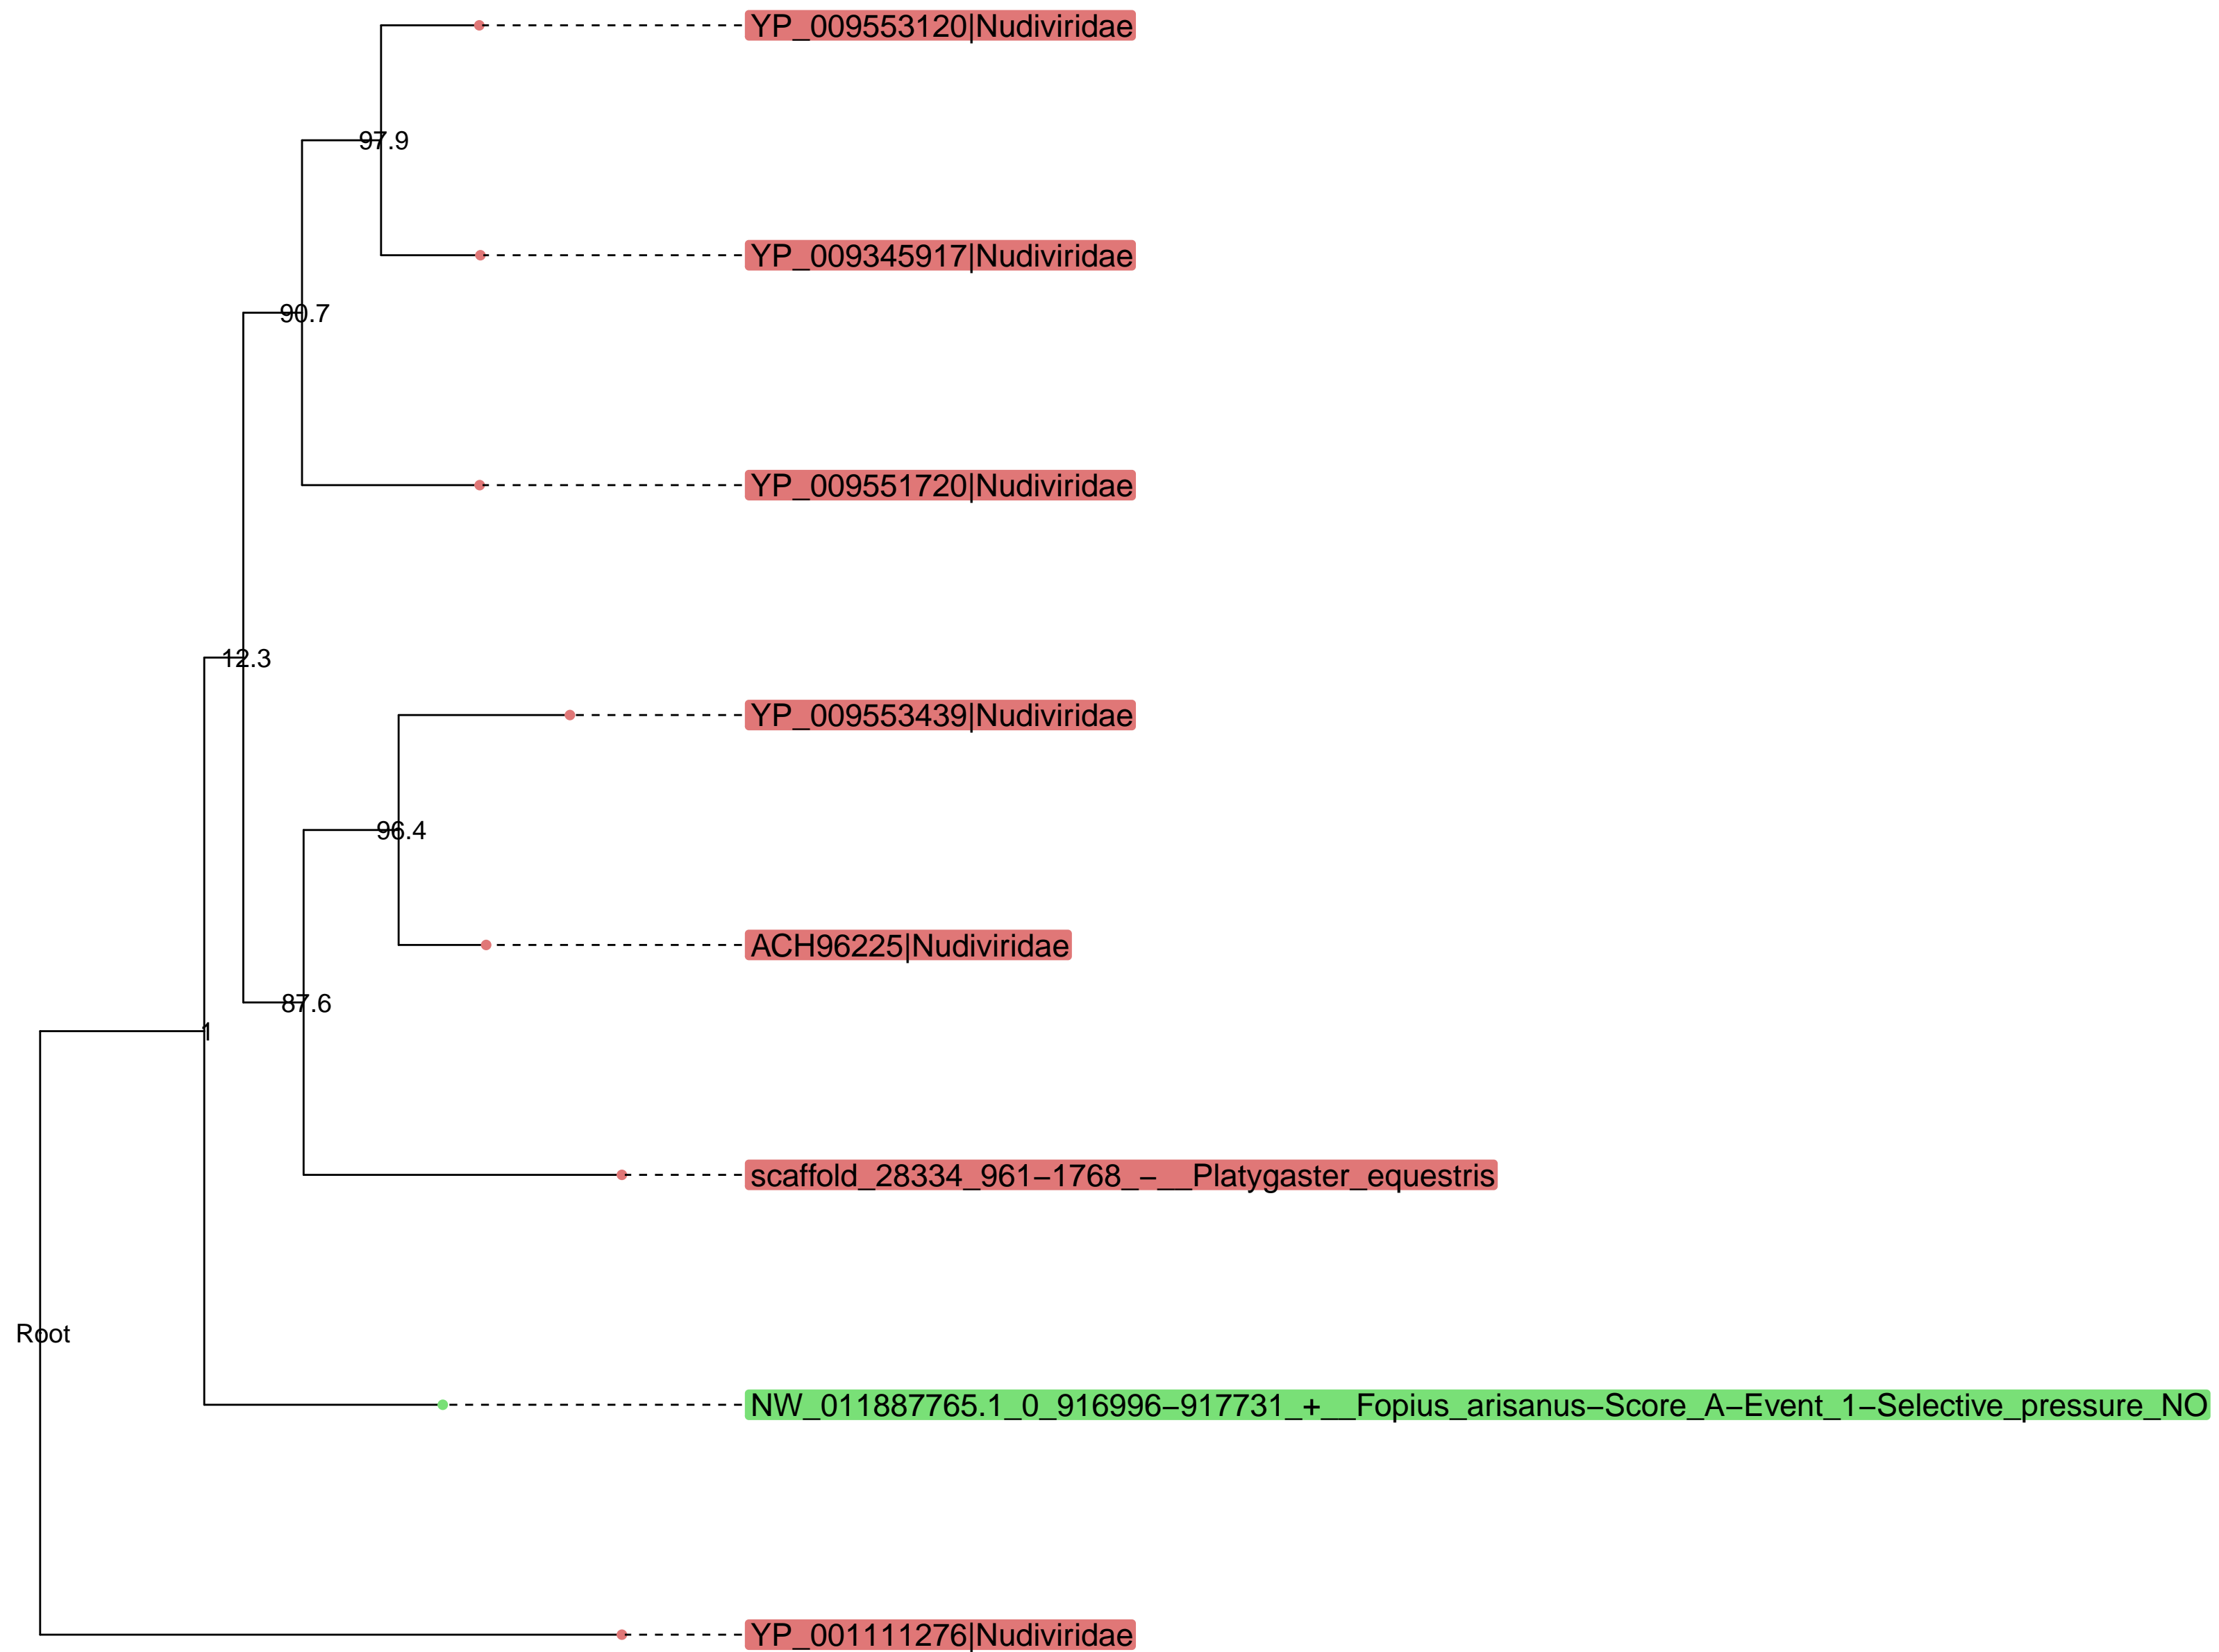

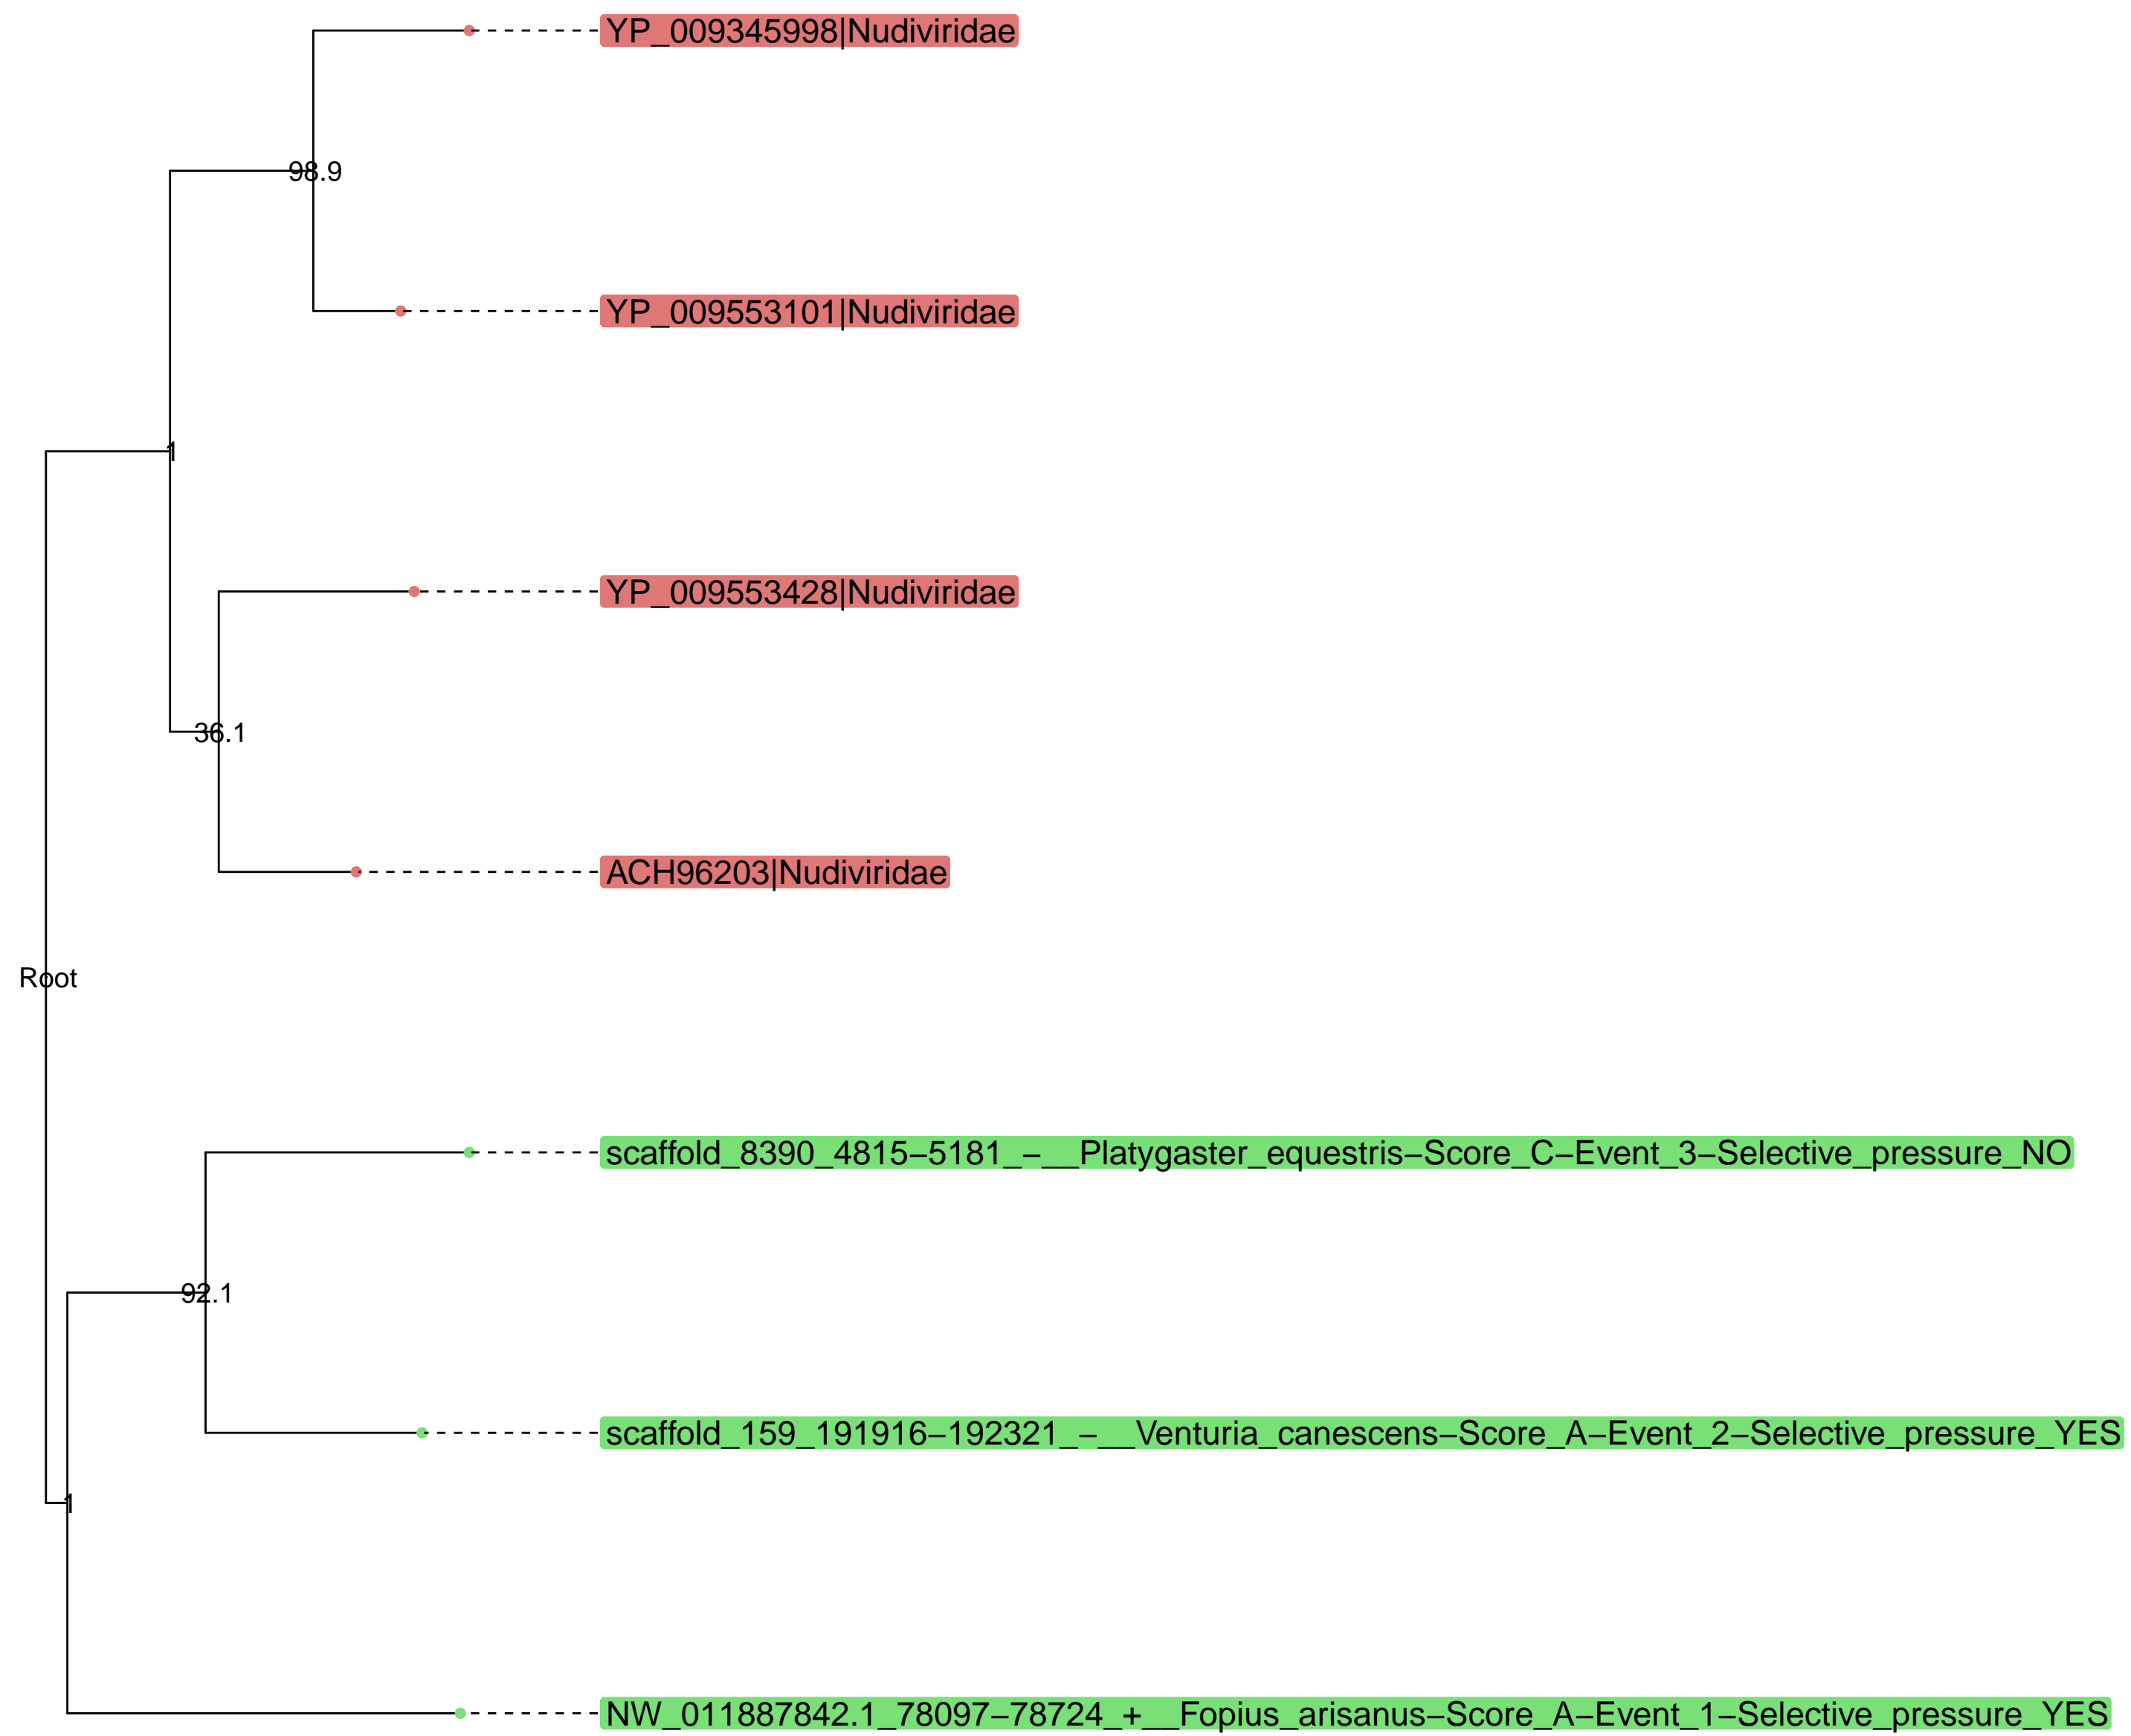

Cluster23691 – families involved : ['Nudiviridae'] – putative protein : ['ACH96133.1 GrBNV gp13-like protein']

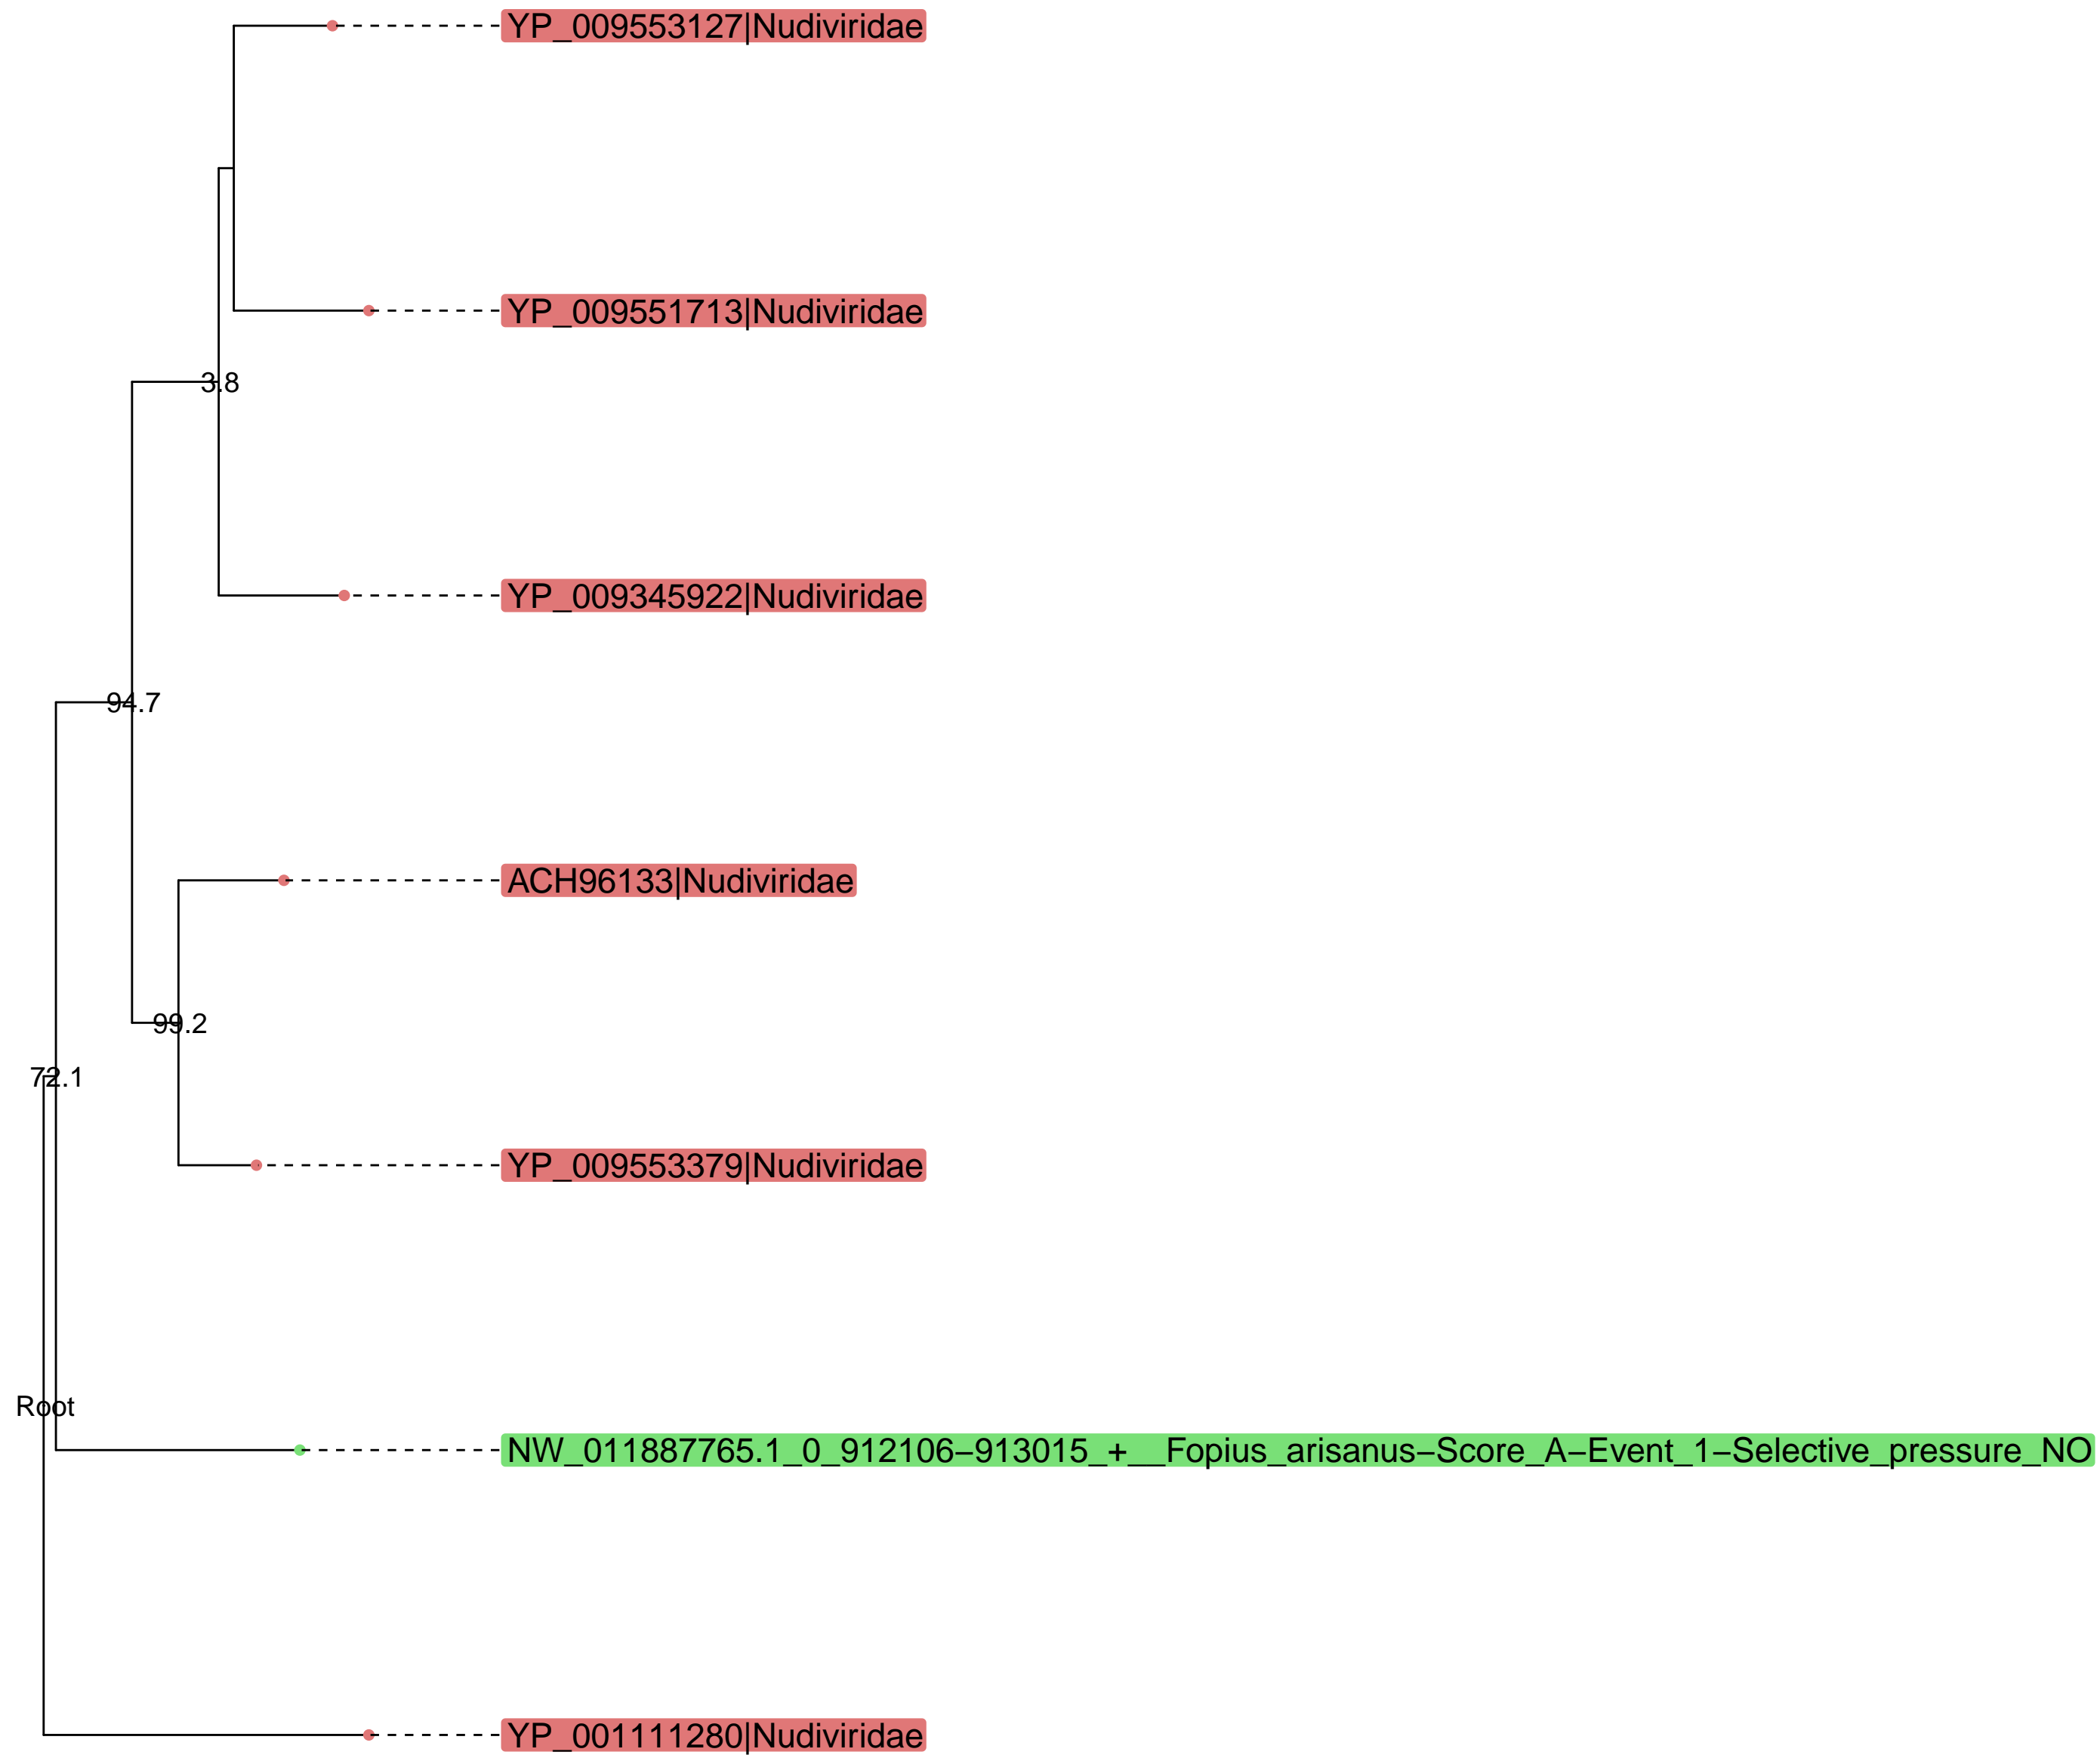



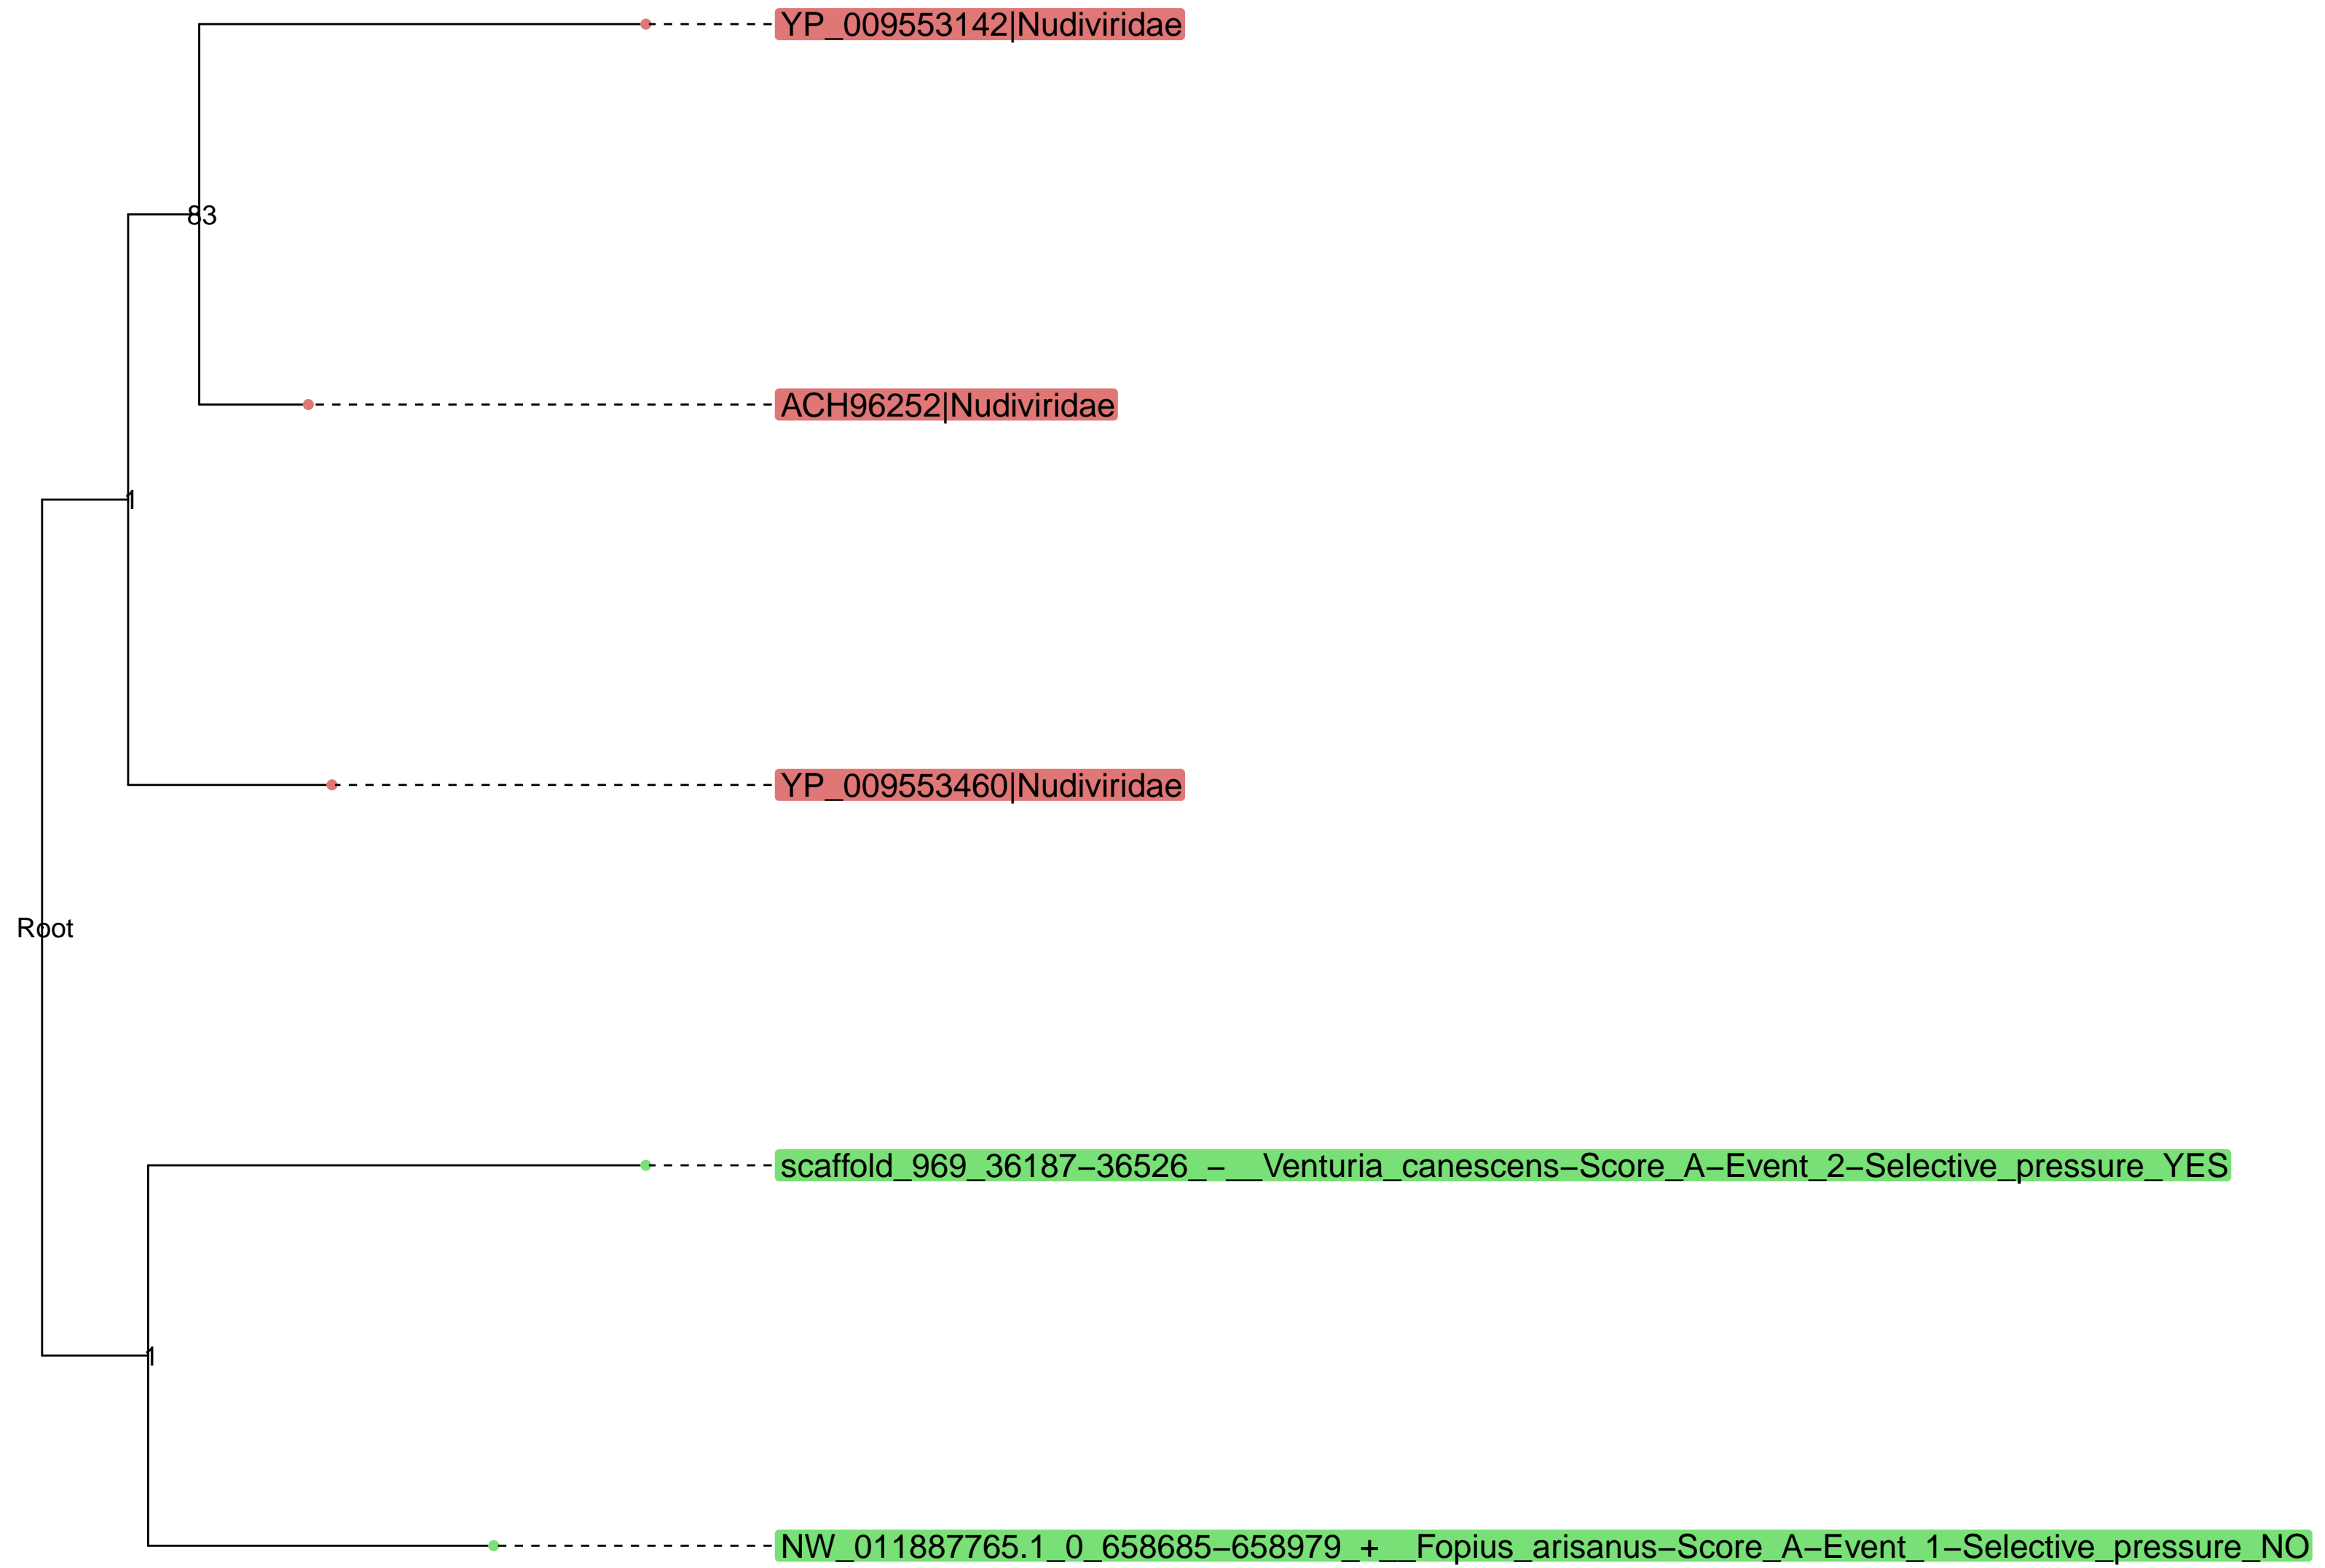

Cluster2197 – families involved : ['Nudiviridae'] – putative protein : ['ACH96250.1 GrBNV gp37-like protein']

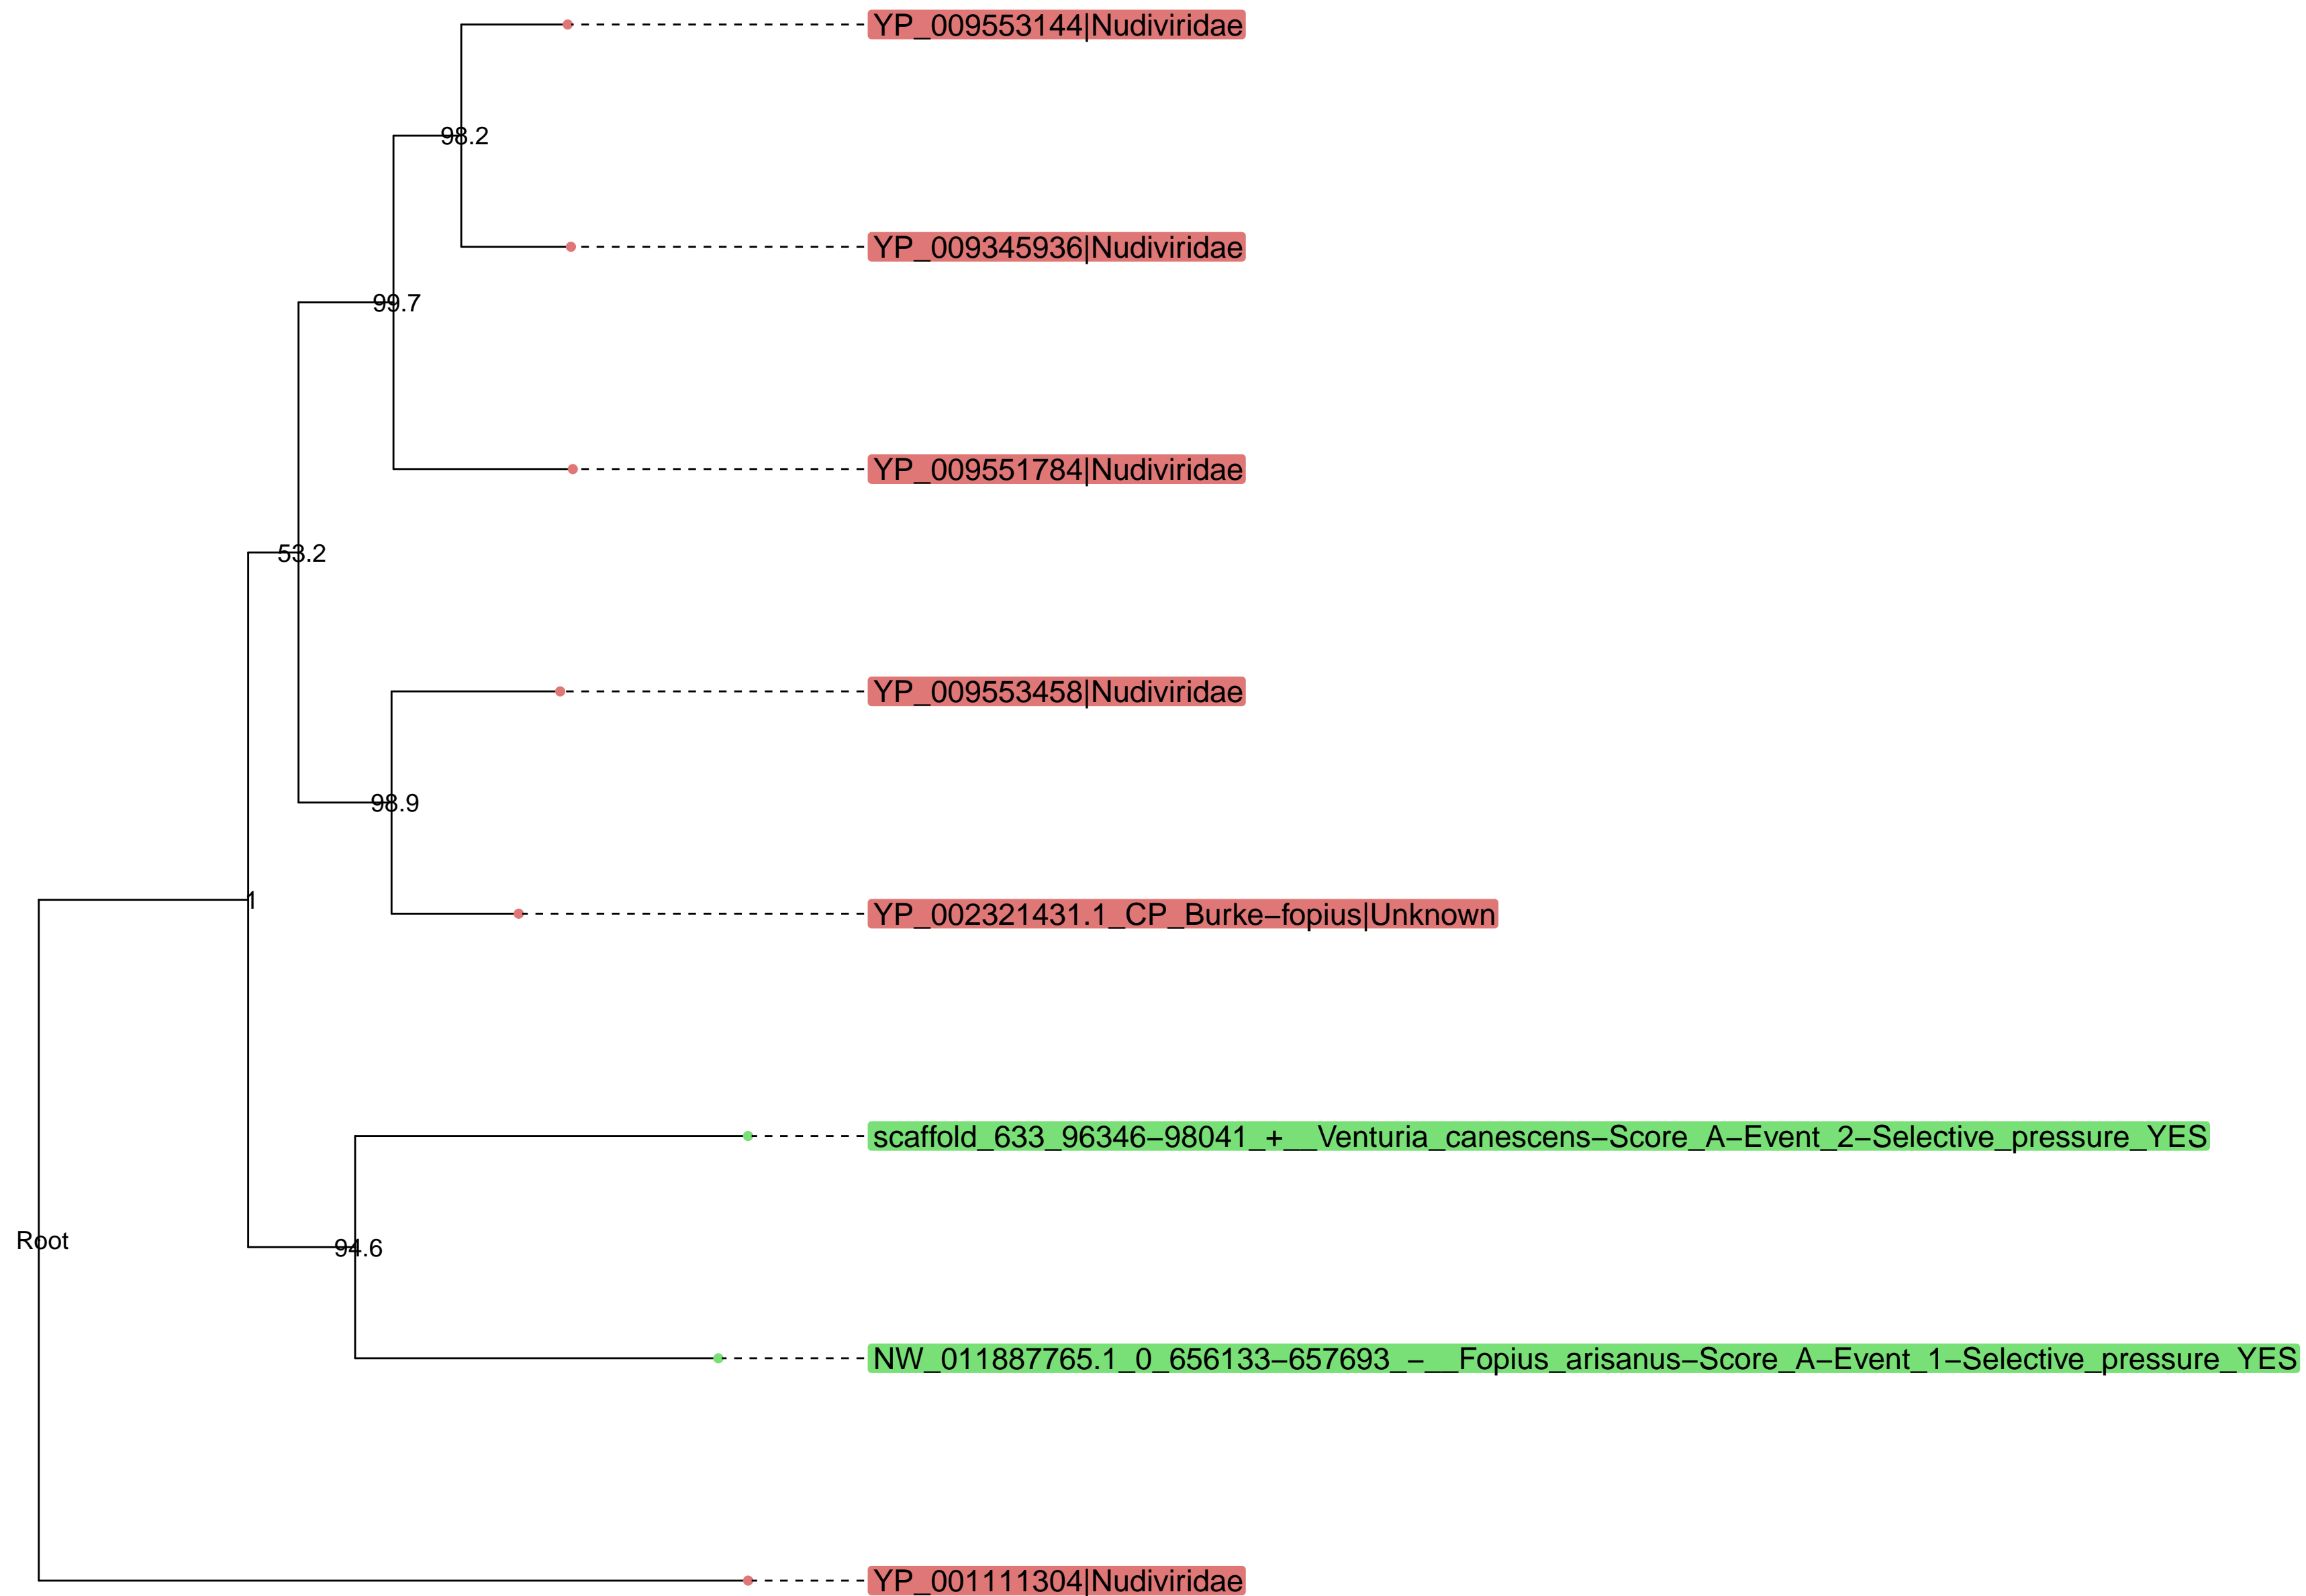

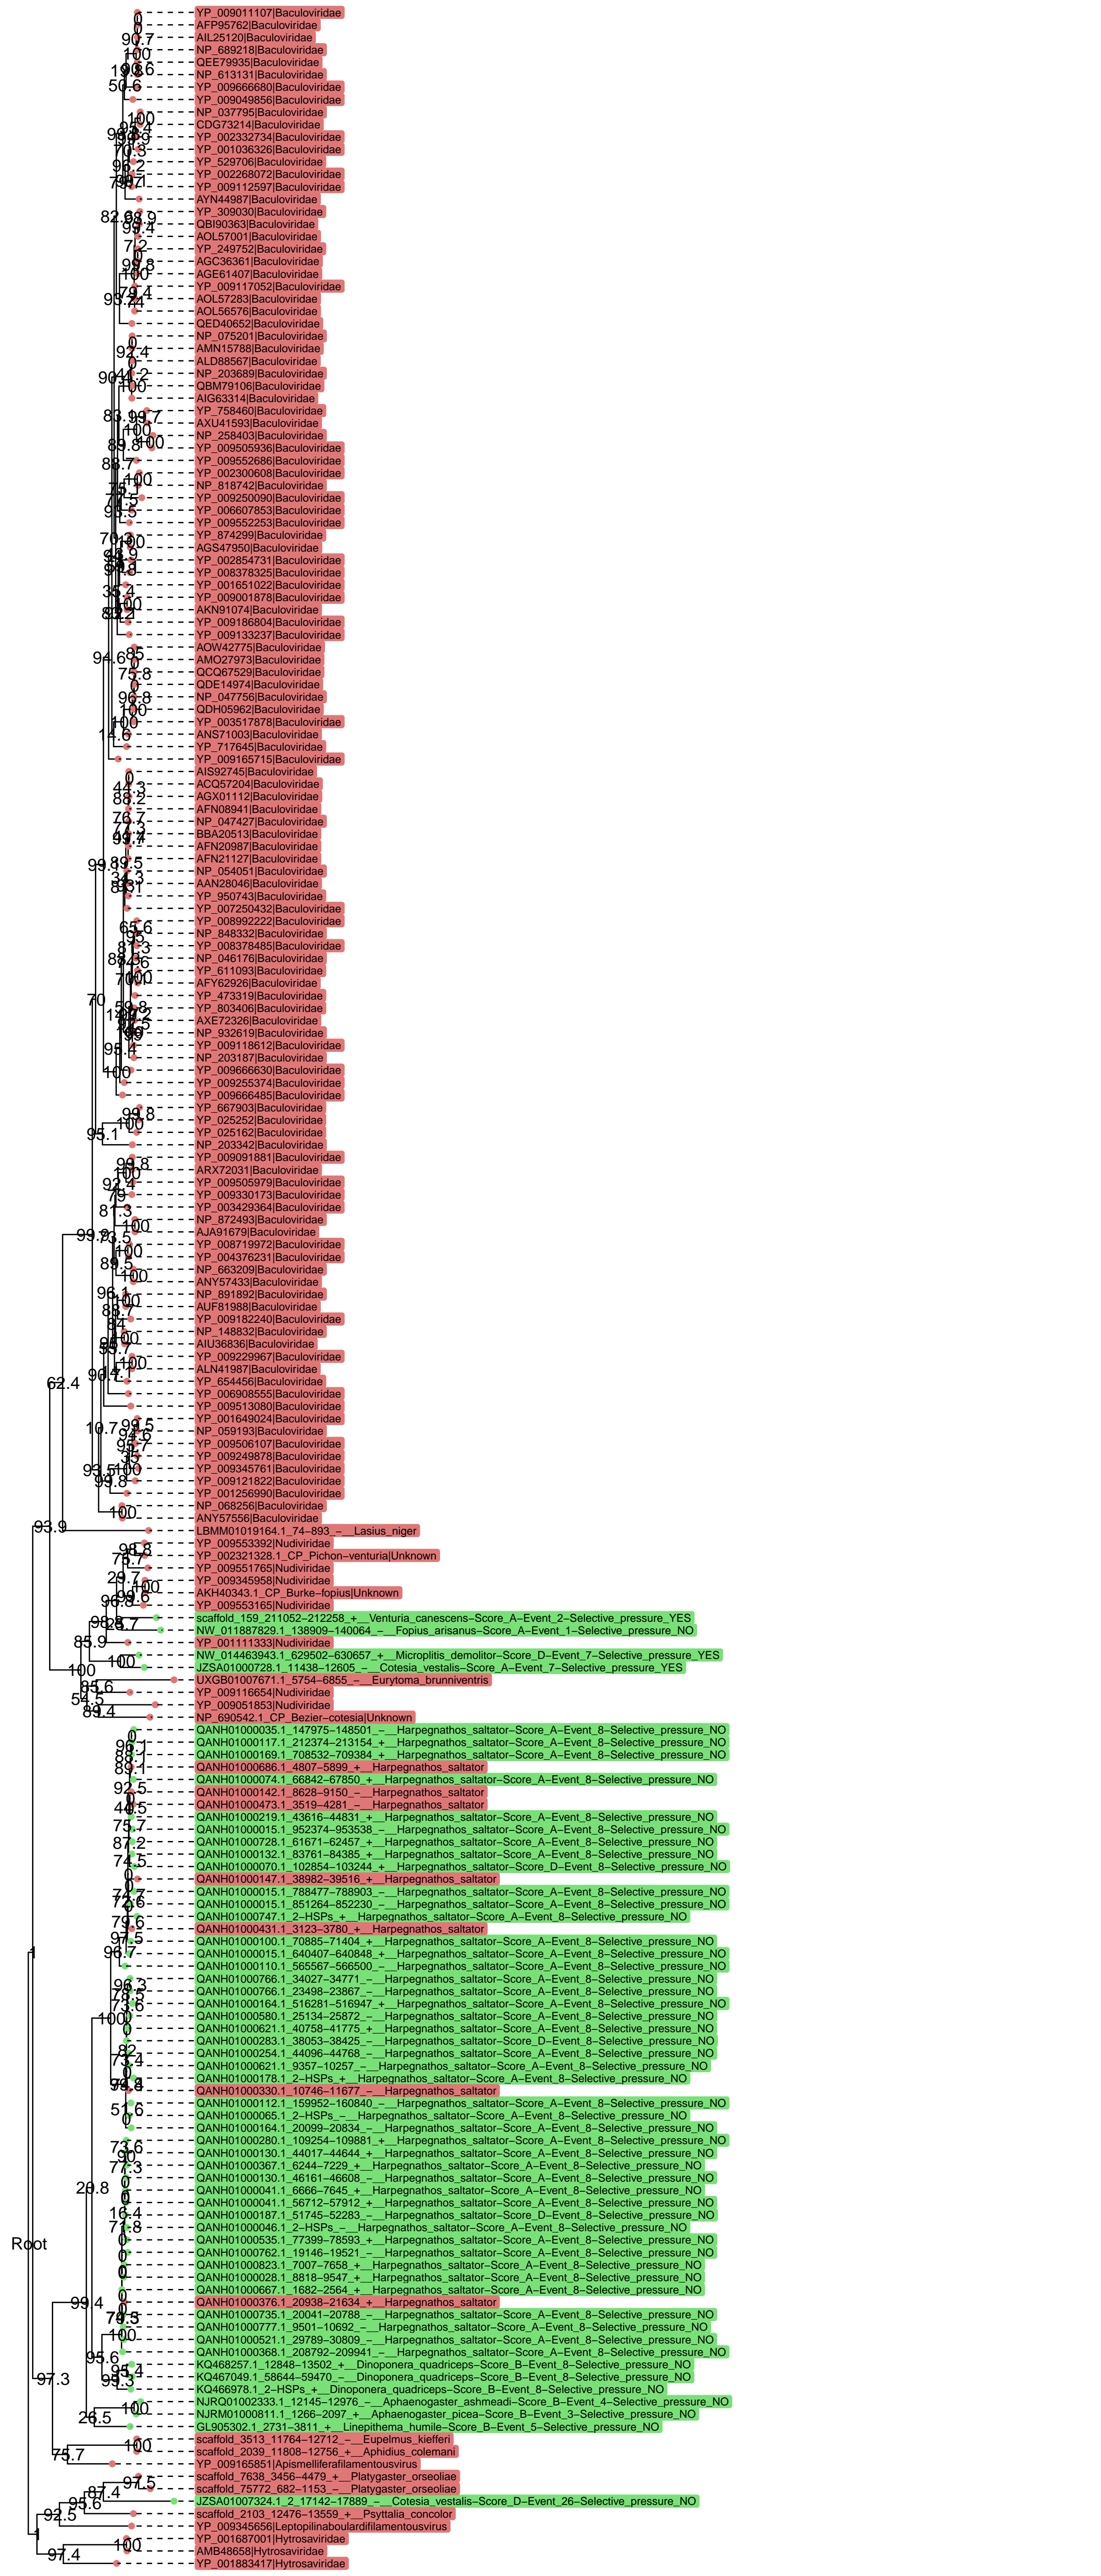

Cluster21204 – families involved : ['Nudiviridae'] – putative protein : ['ACH96189.1 lef-3-like protein']

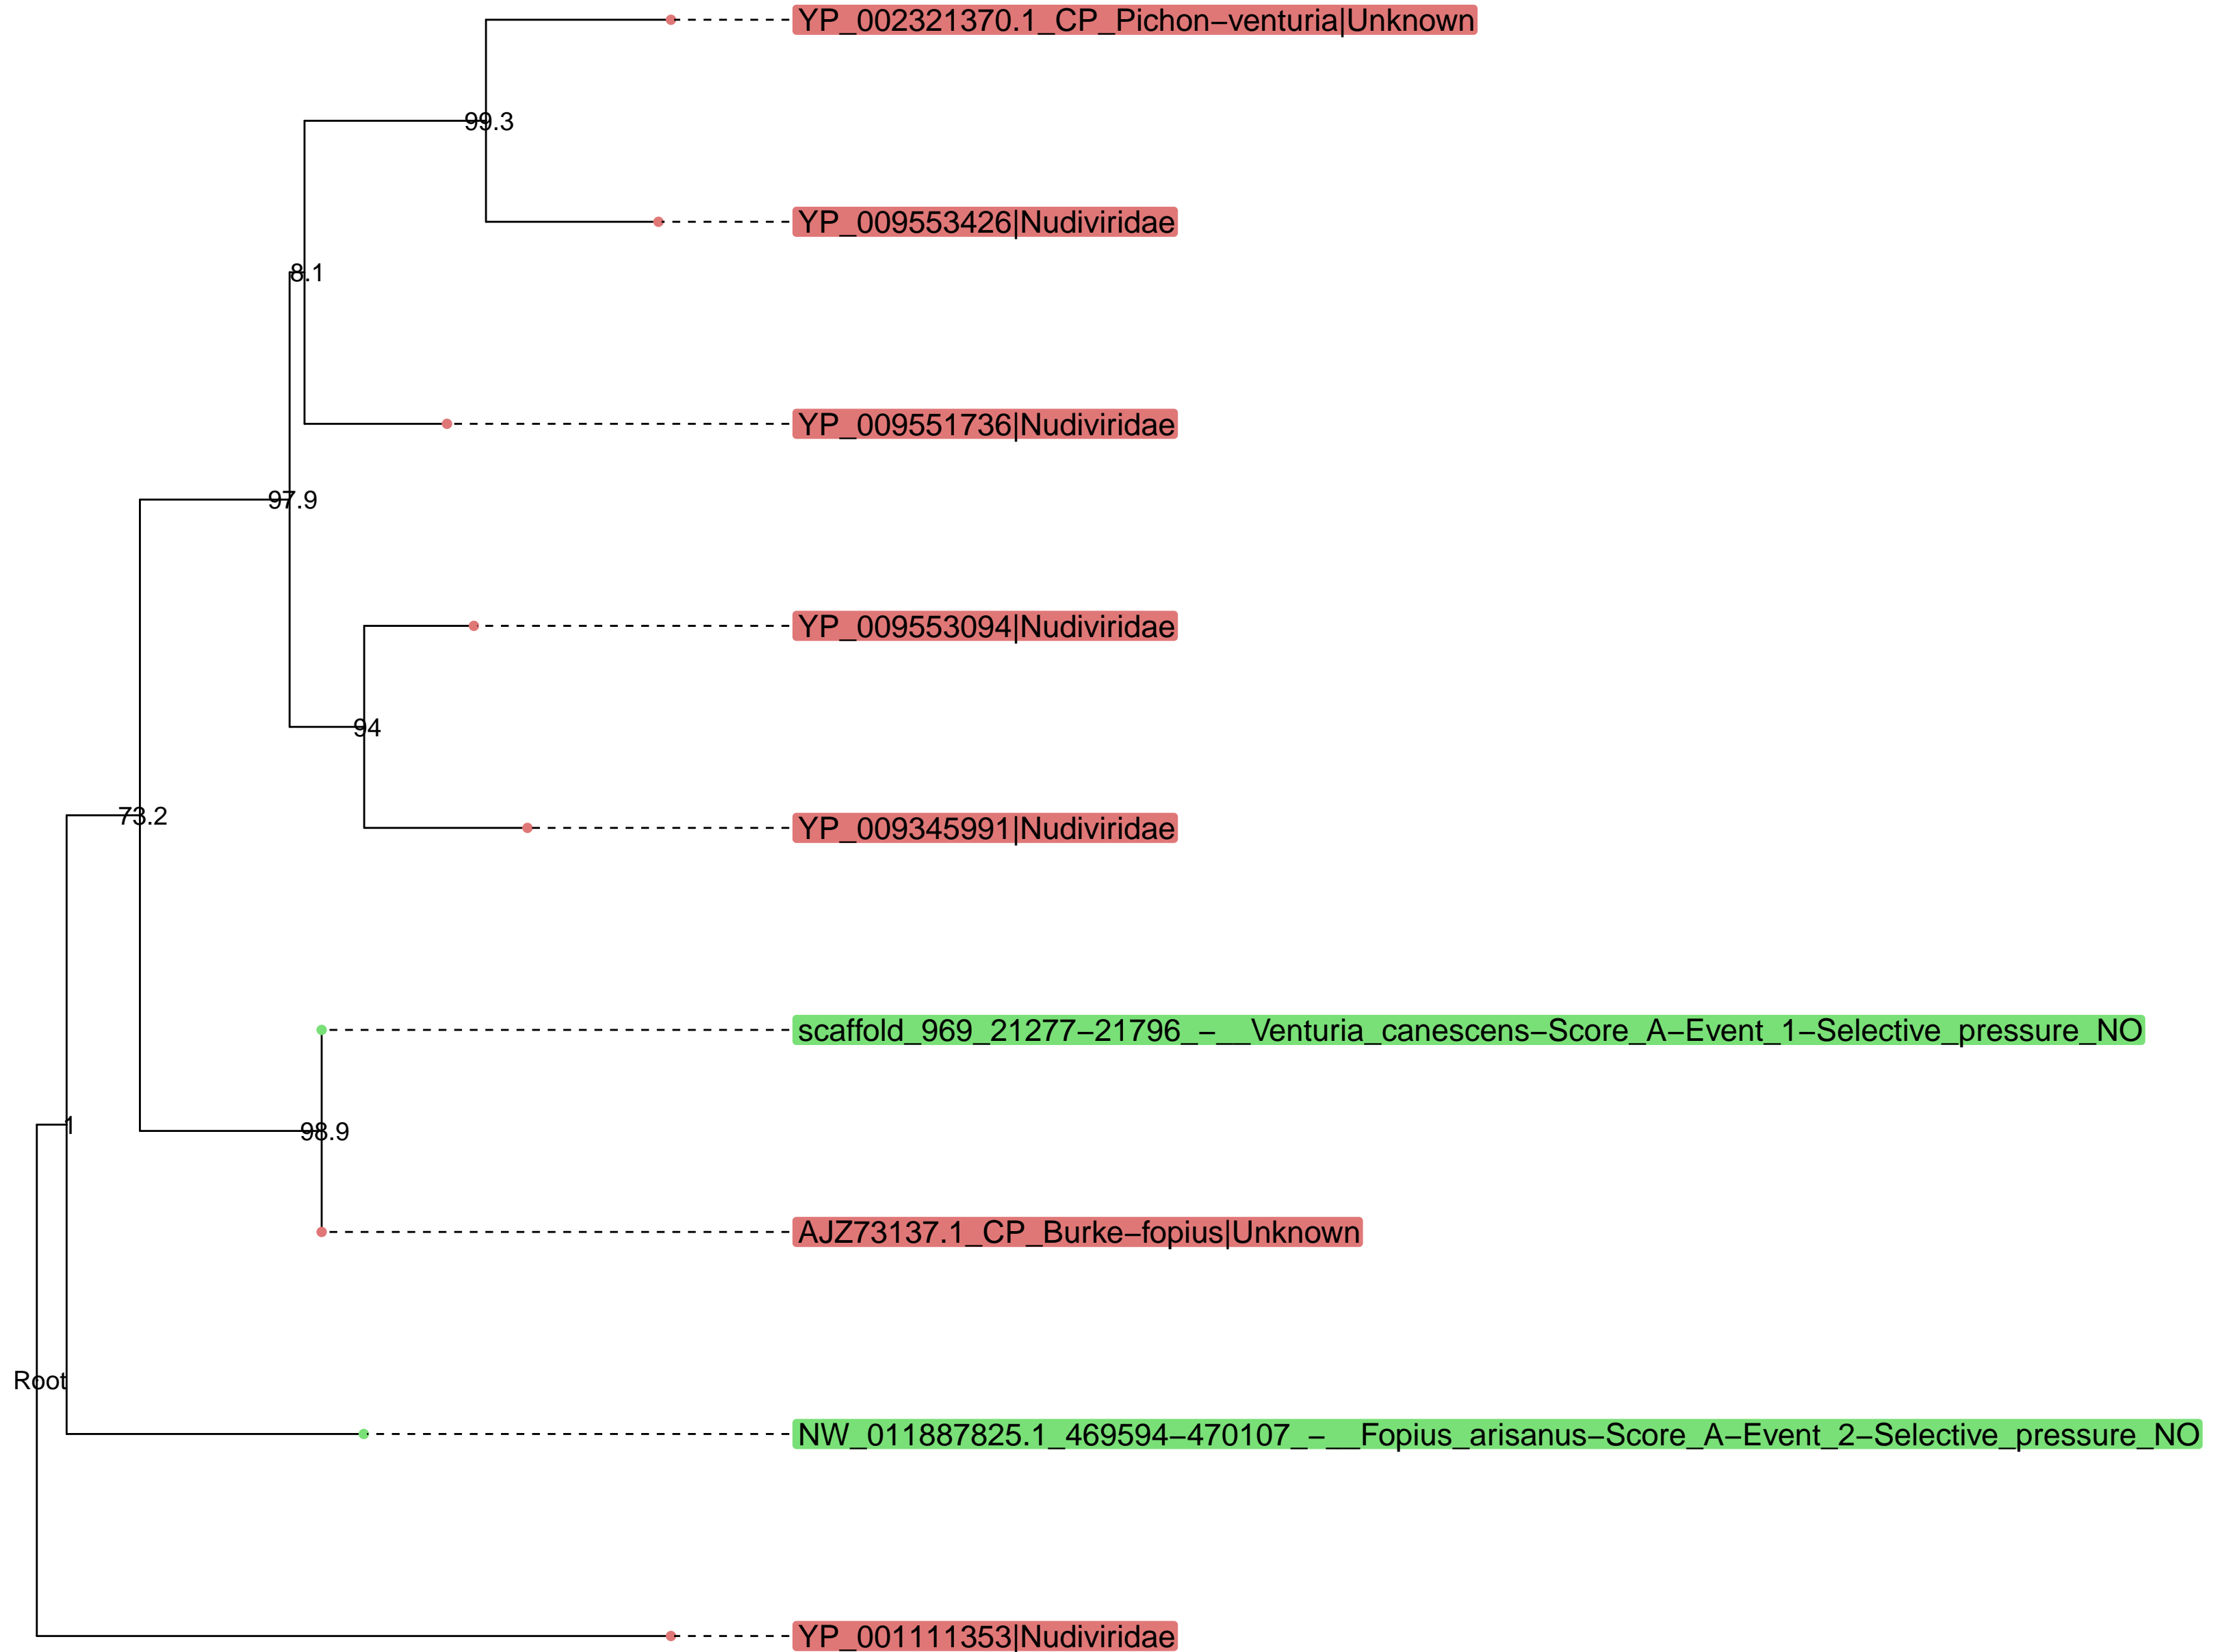

Cluster1971 – families involved : ['Nudiviridae'] – putative protein : ['ACH96157.1 GrBNV gp78-like protein']

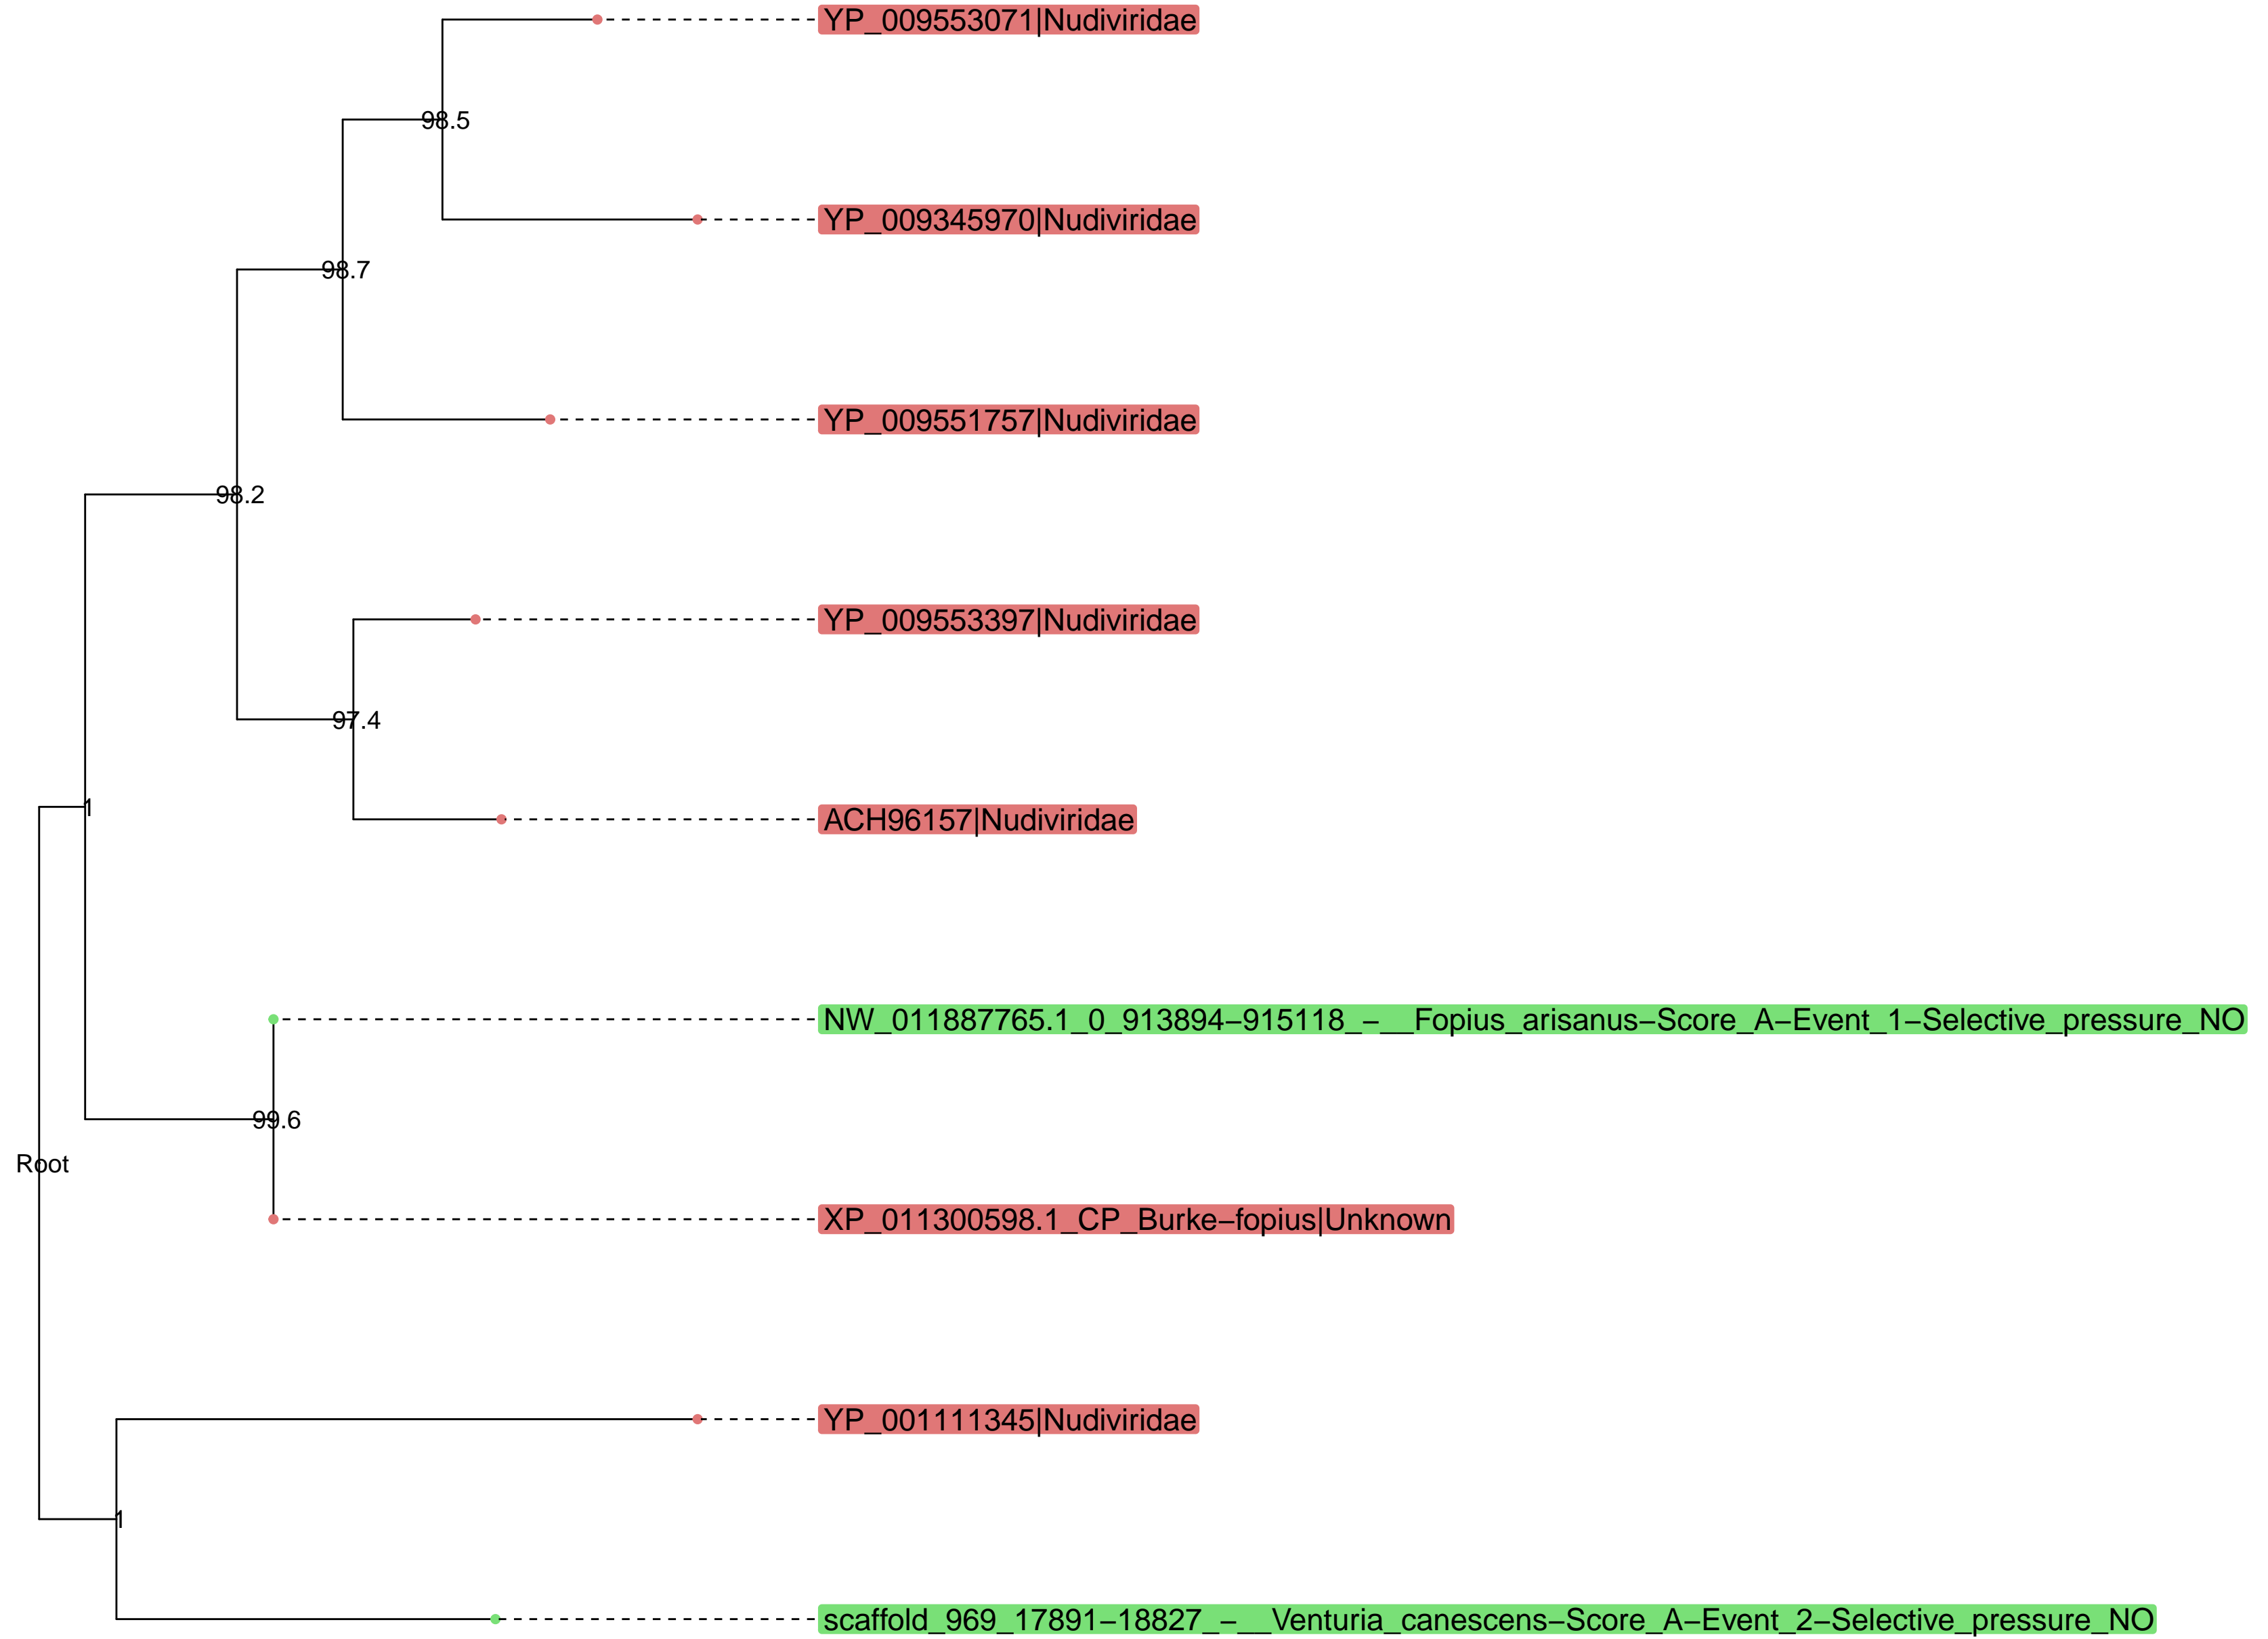

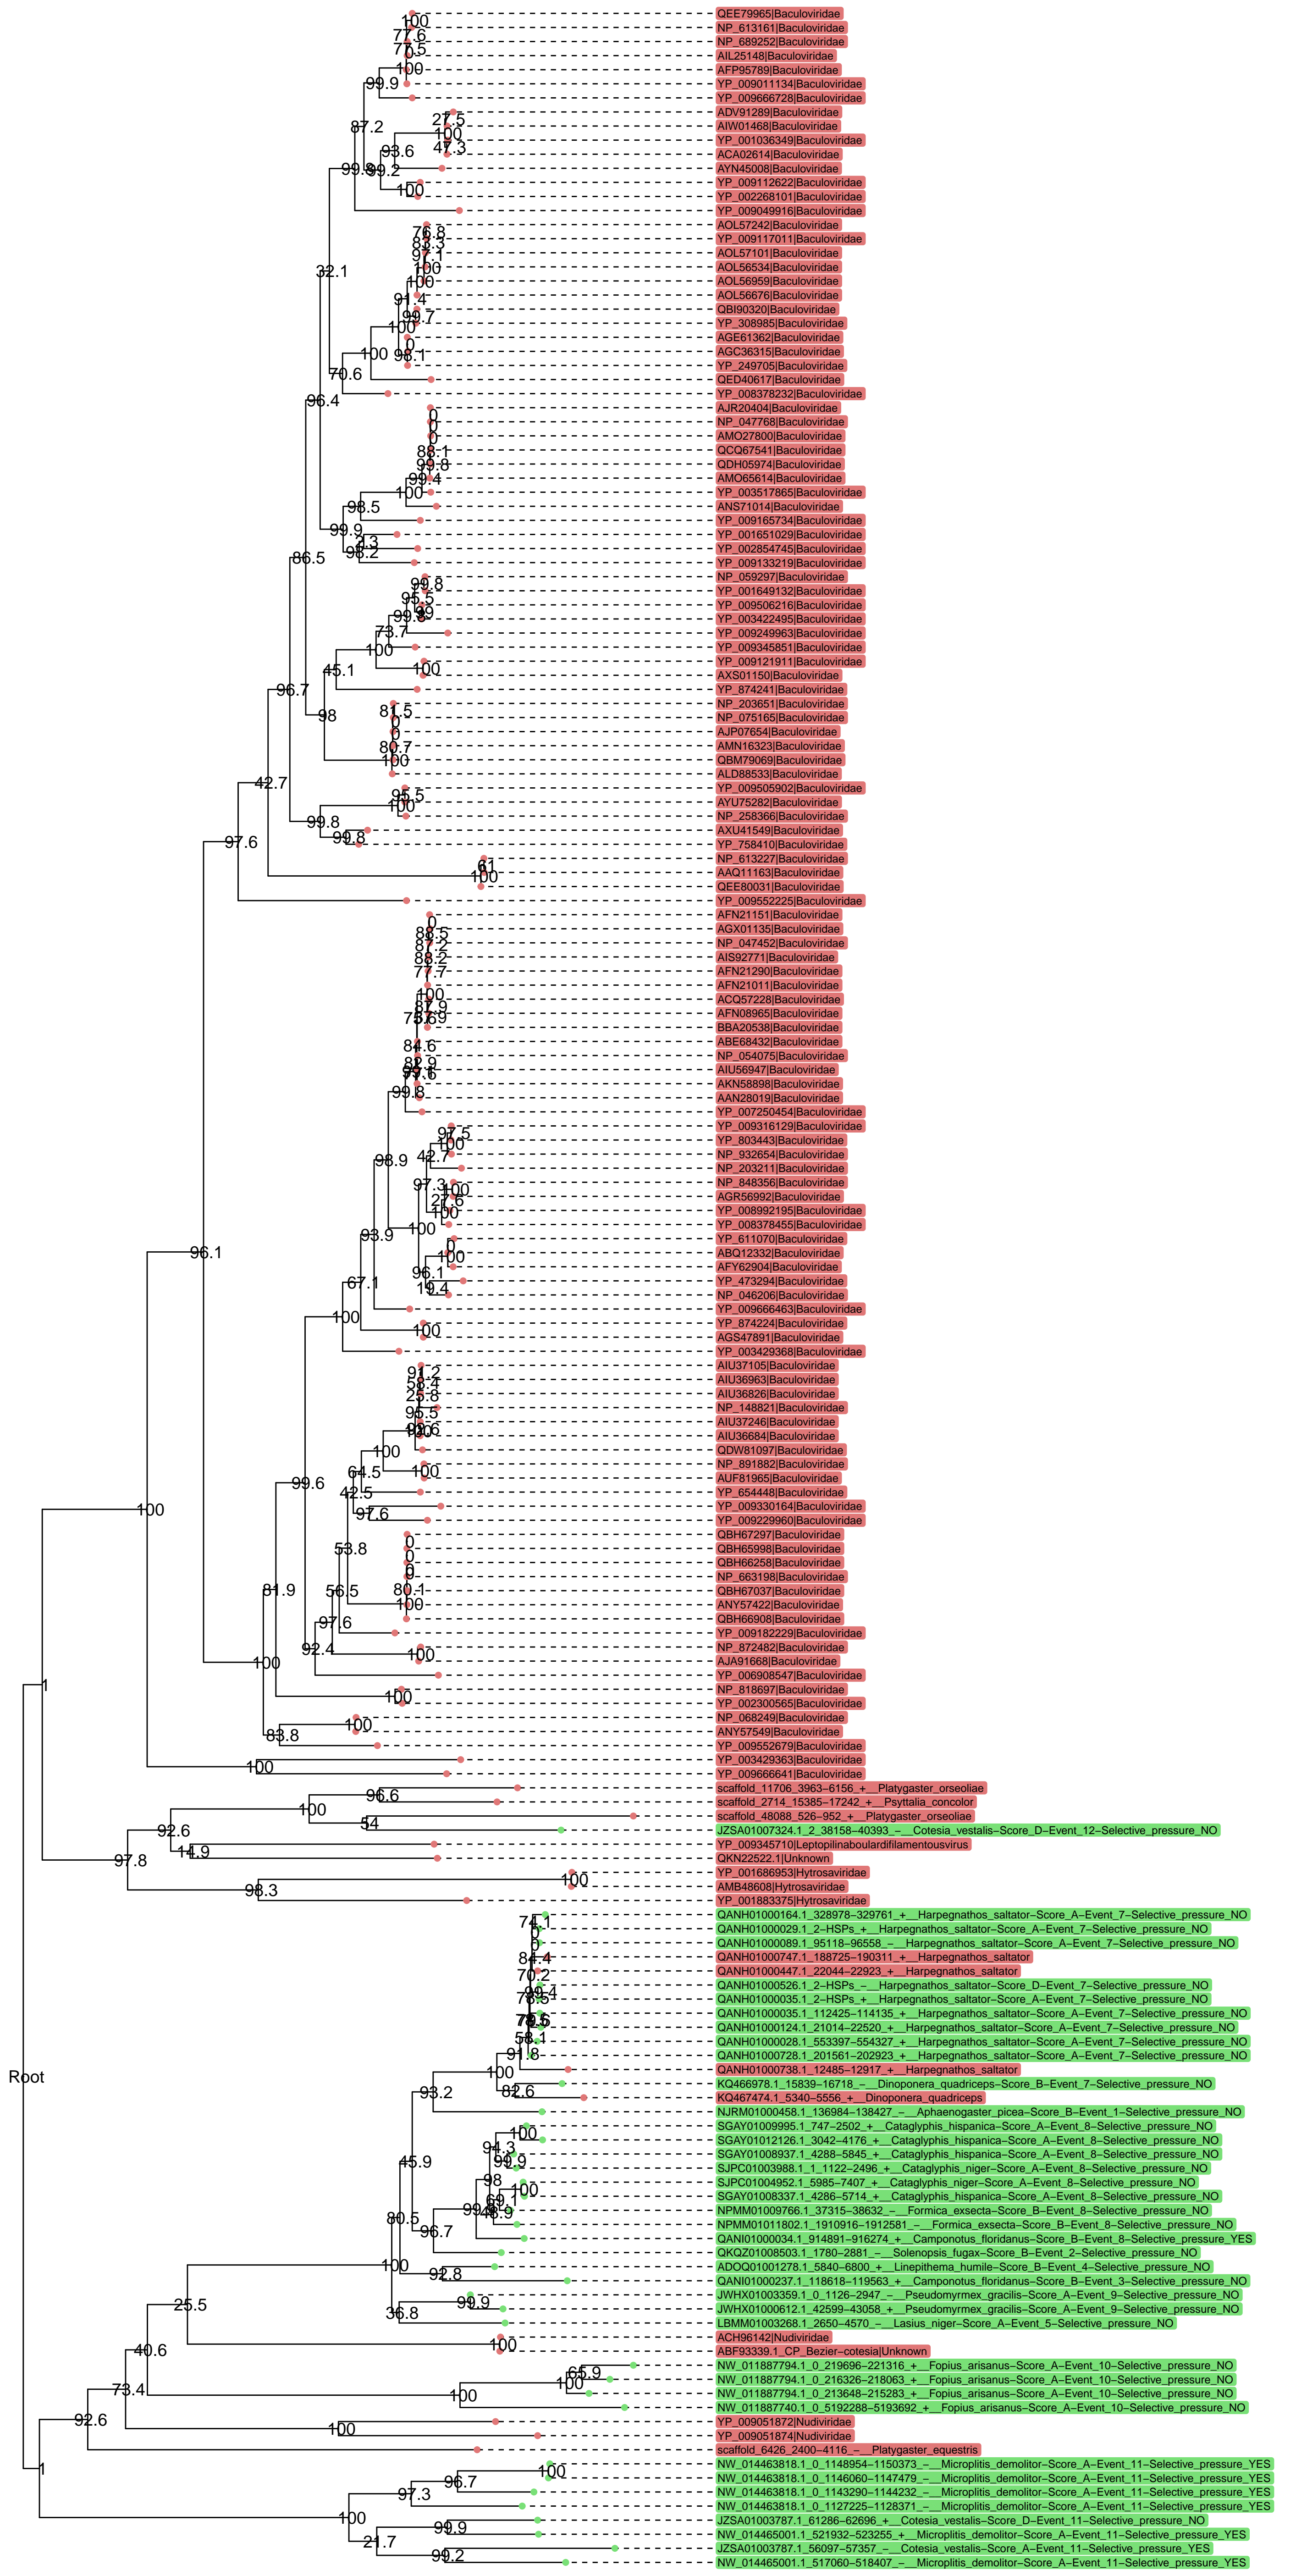

Cluster19564 – families involved : ['Nudiviridae'] – putative protein : ['ACH96202.1 Ac68-like protein (Putative Ac68-like protein)']

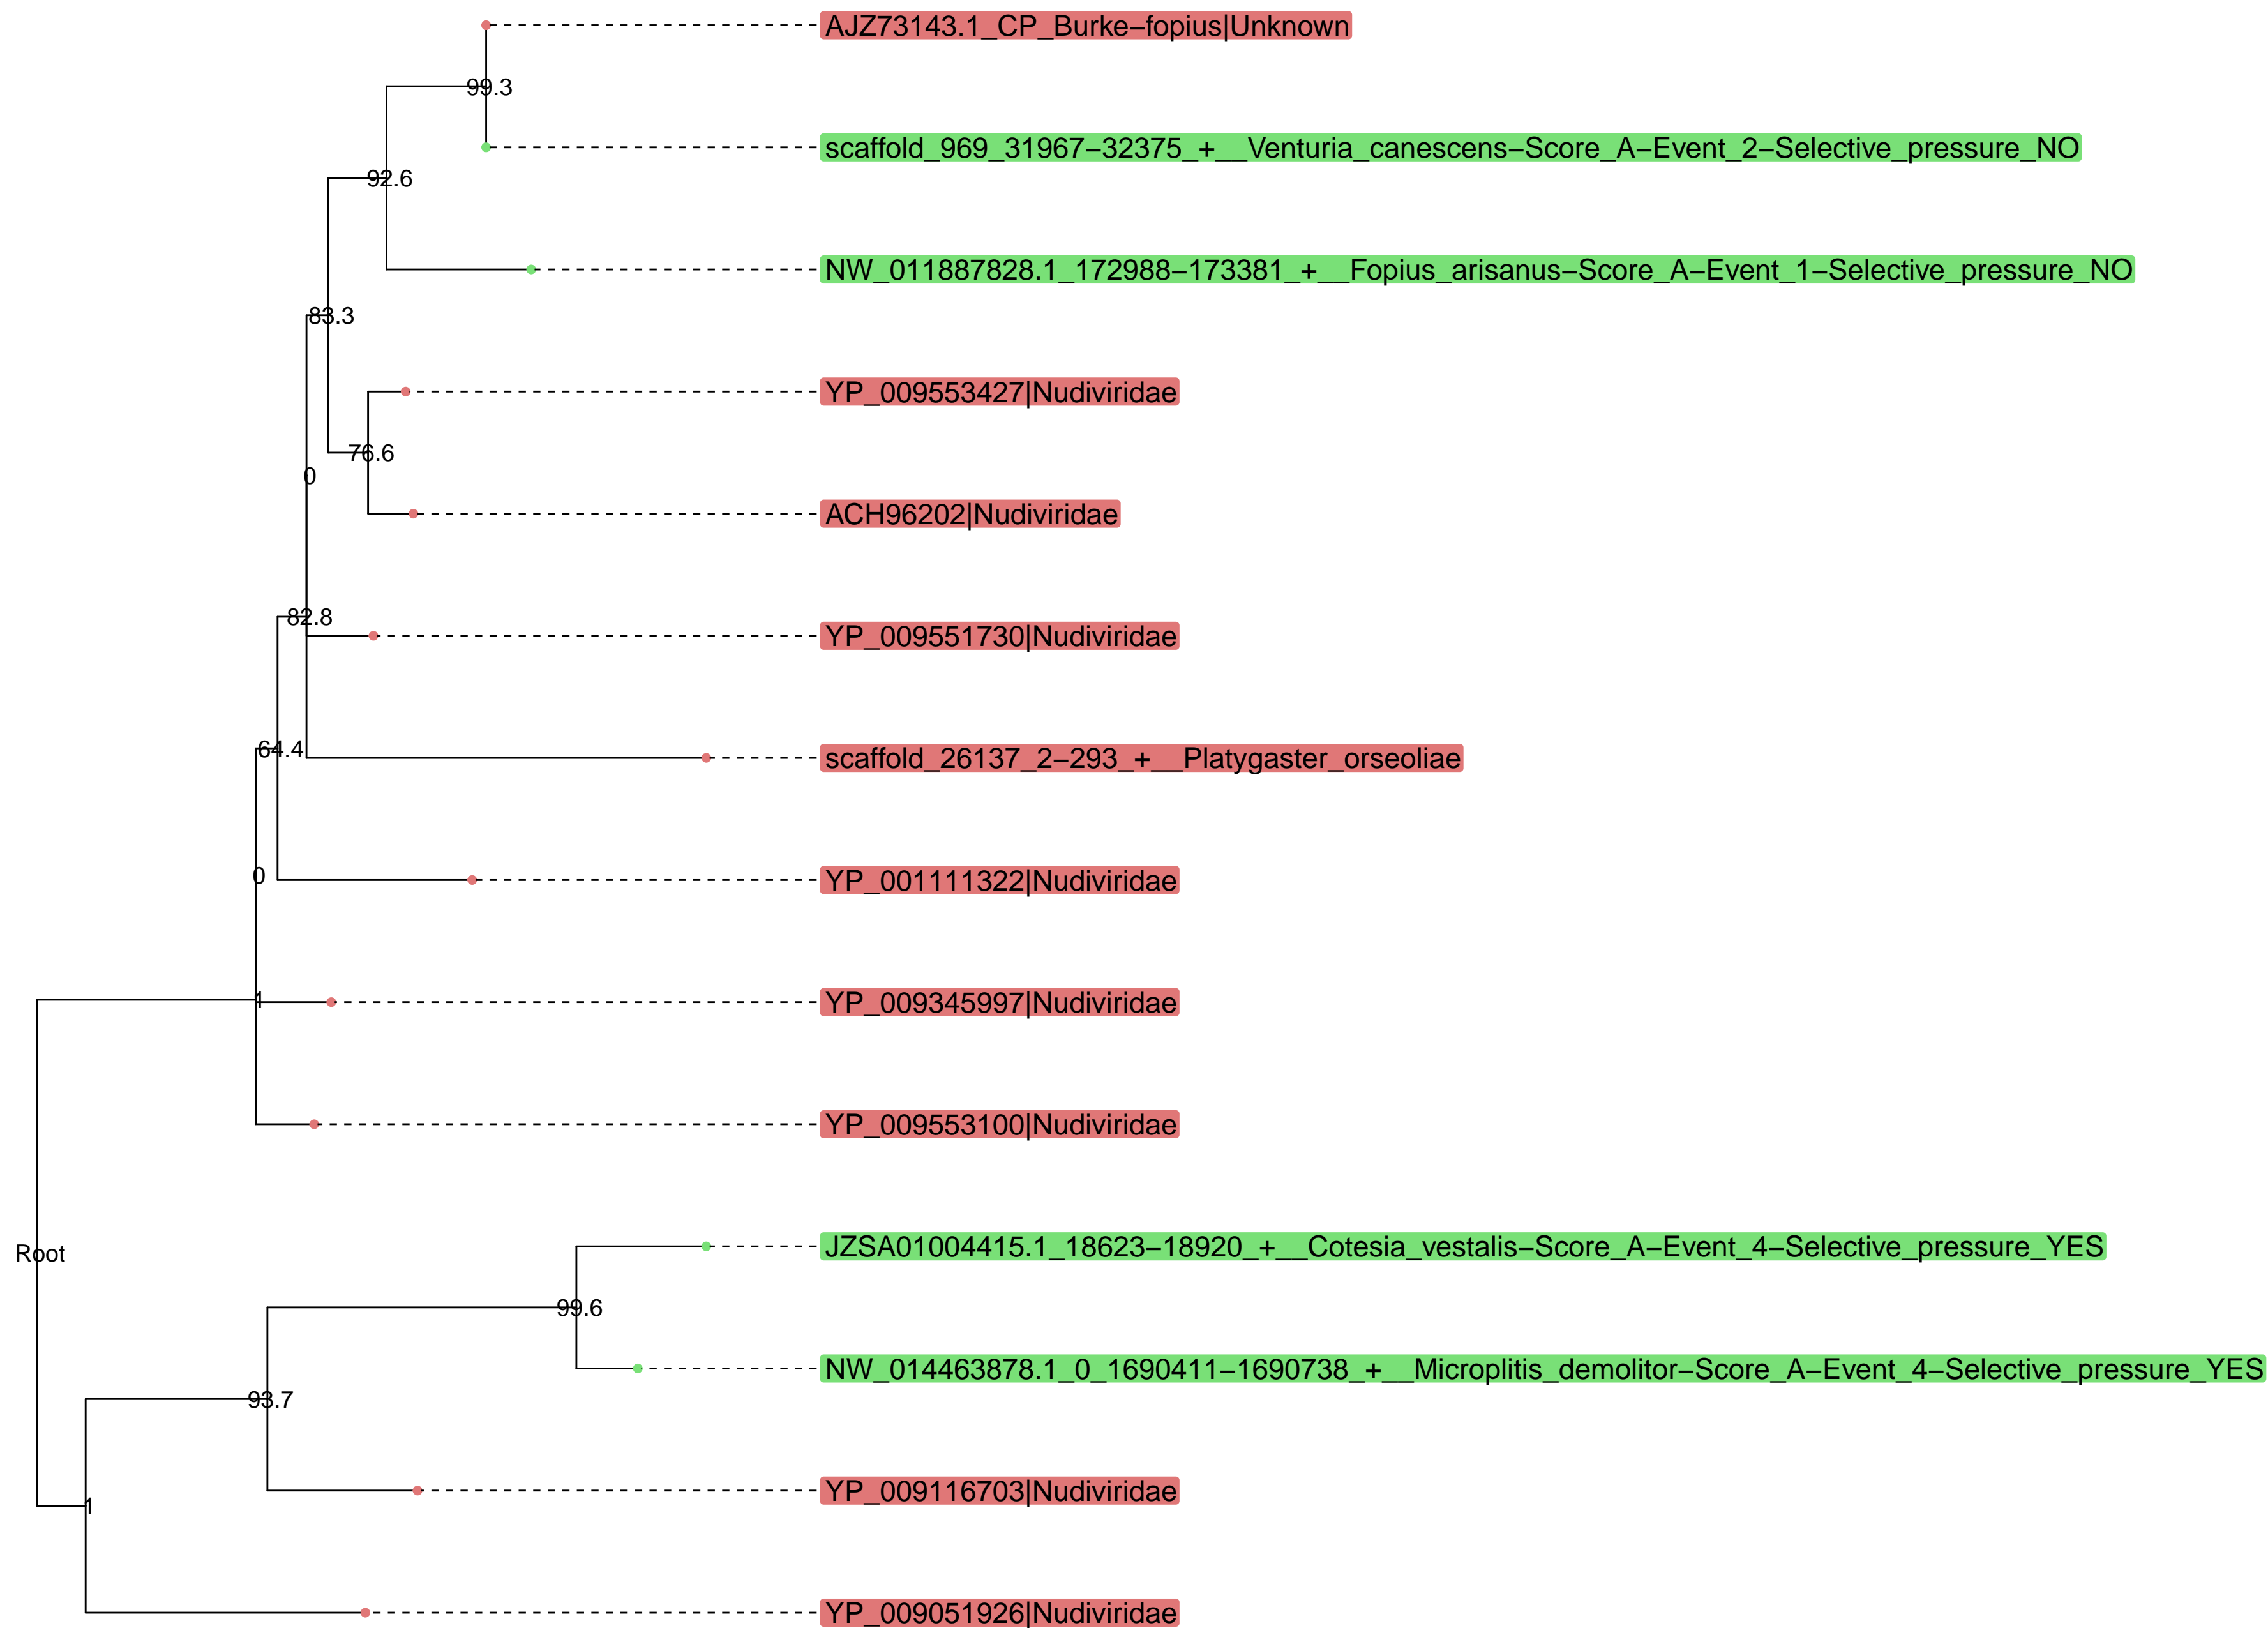

Cluster19347 – families involved : ['Nudiviridae'] – putative protein : ['Vp39']

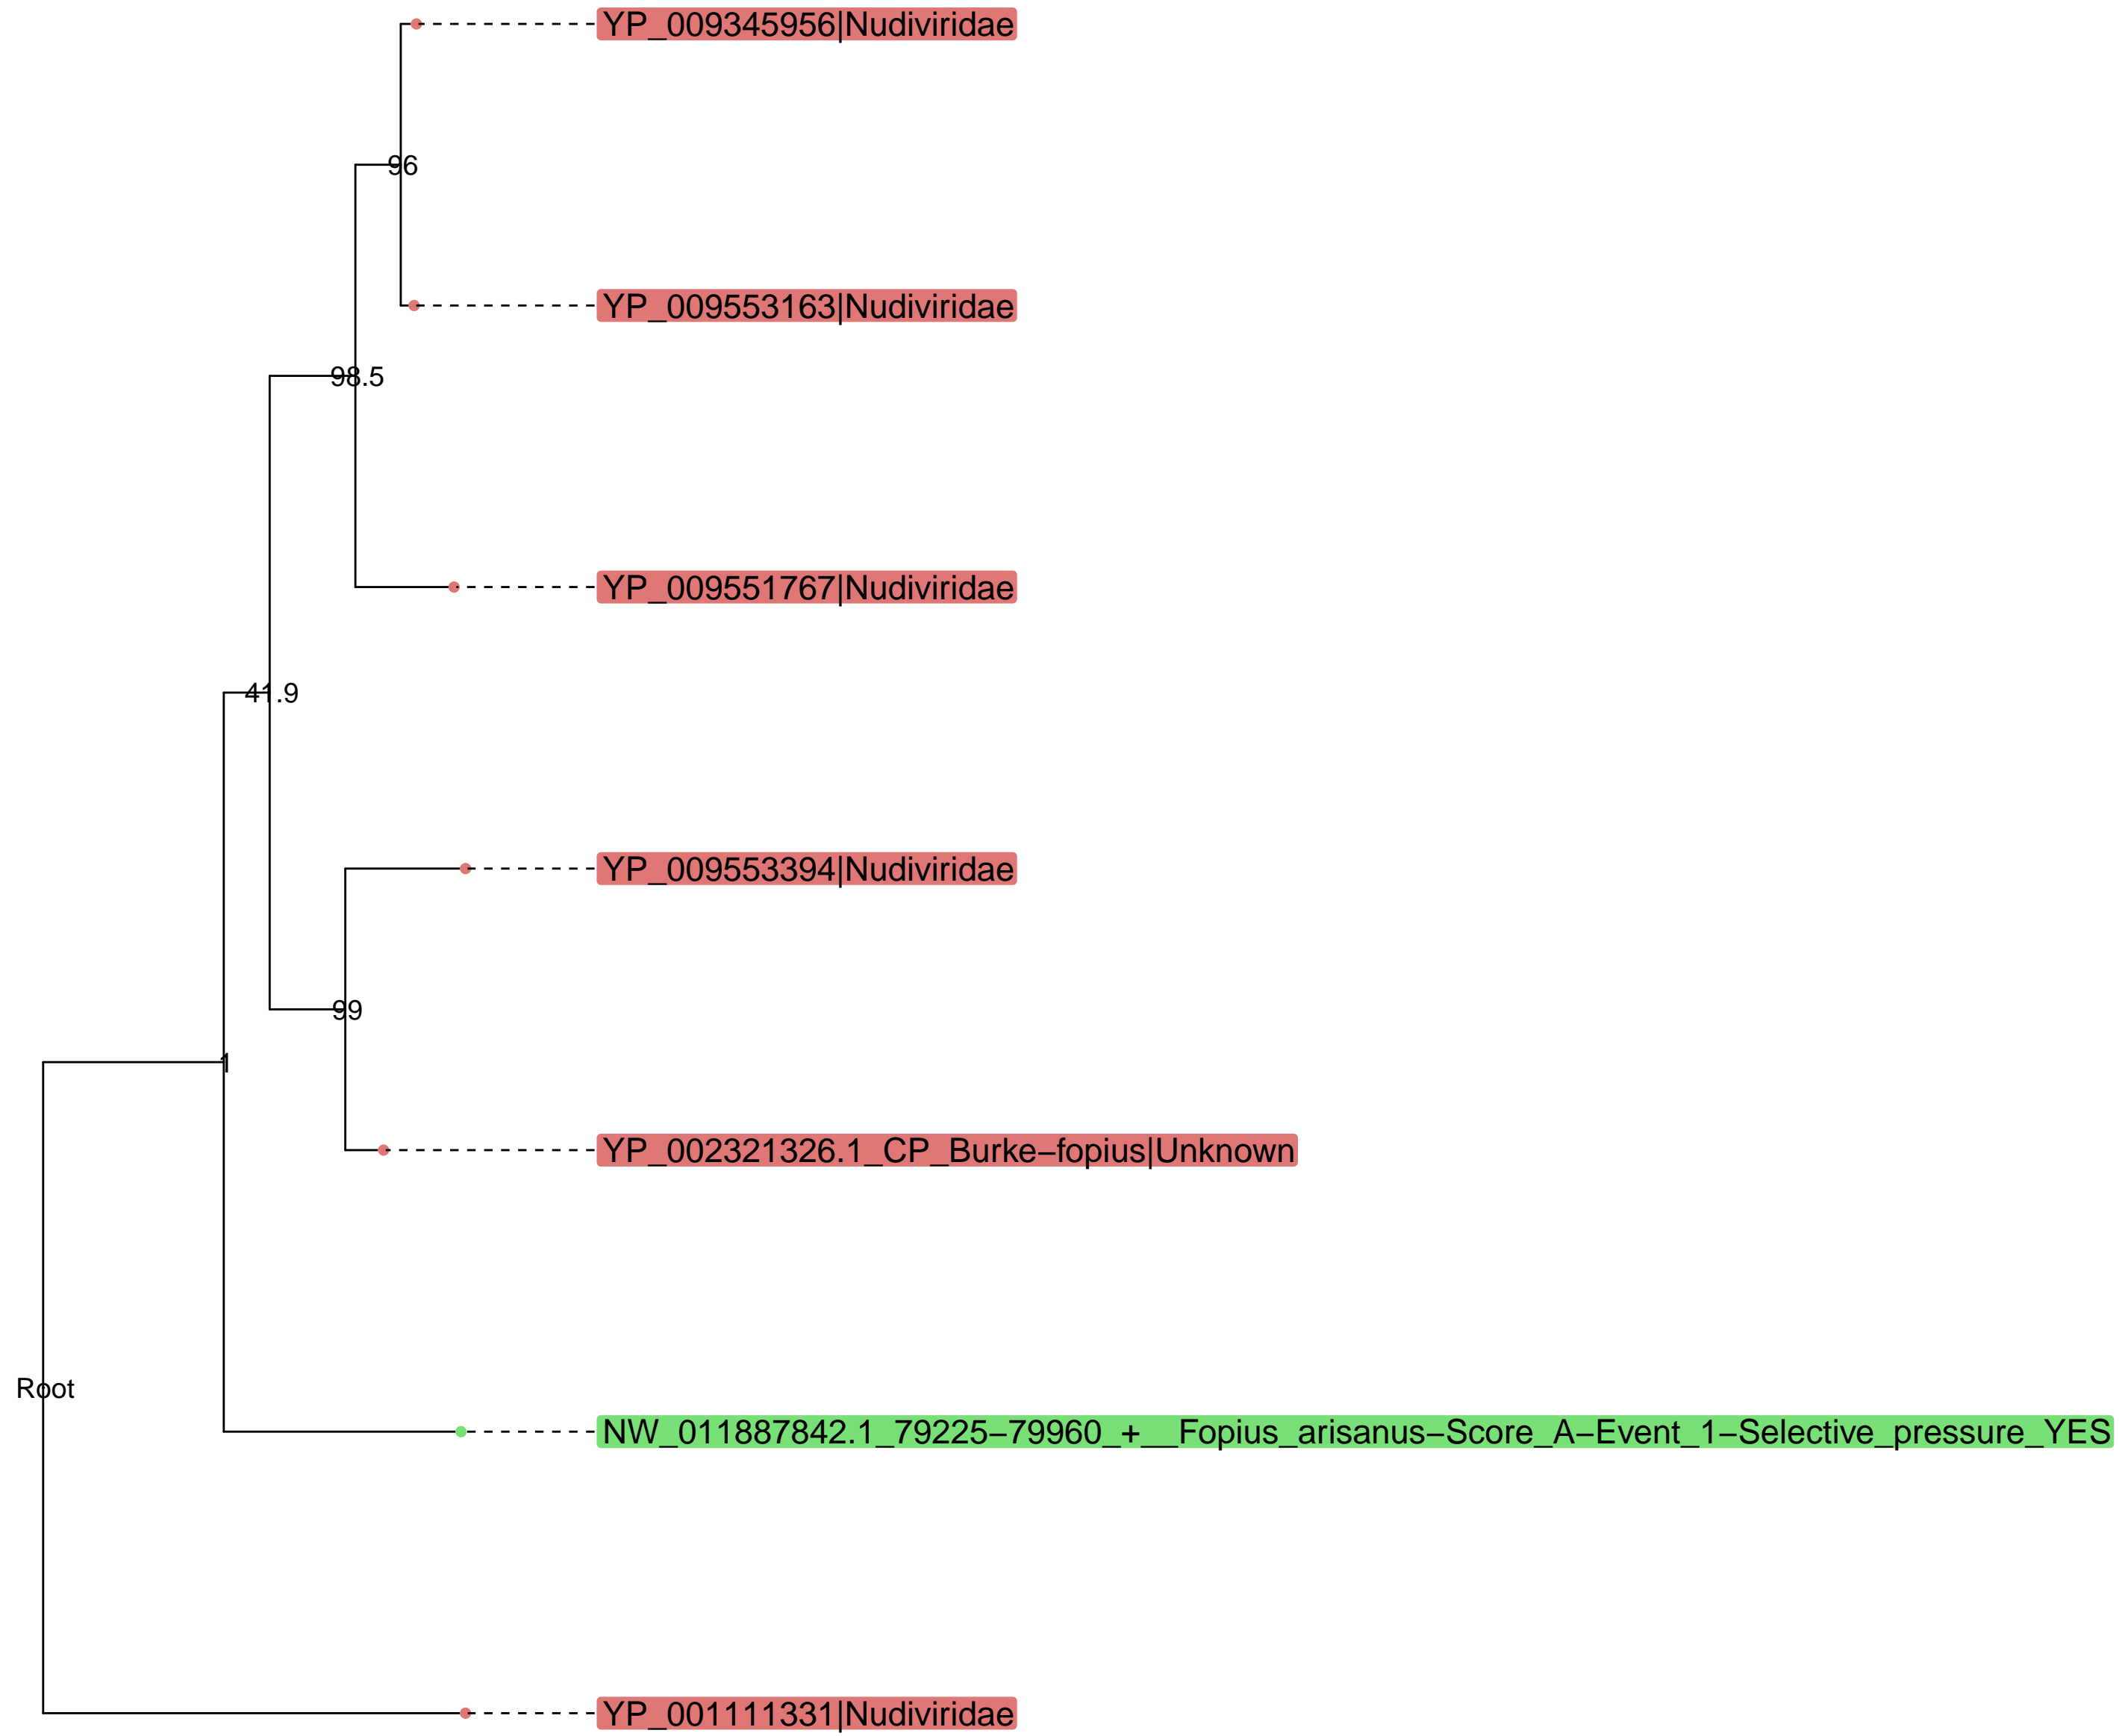



Cluster18349 – families involved : ['Nudiviridae'] – putative protein : ['alpha/beta hydrolase fold']

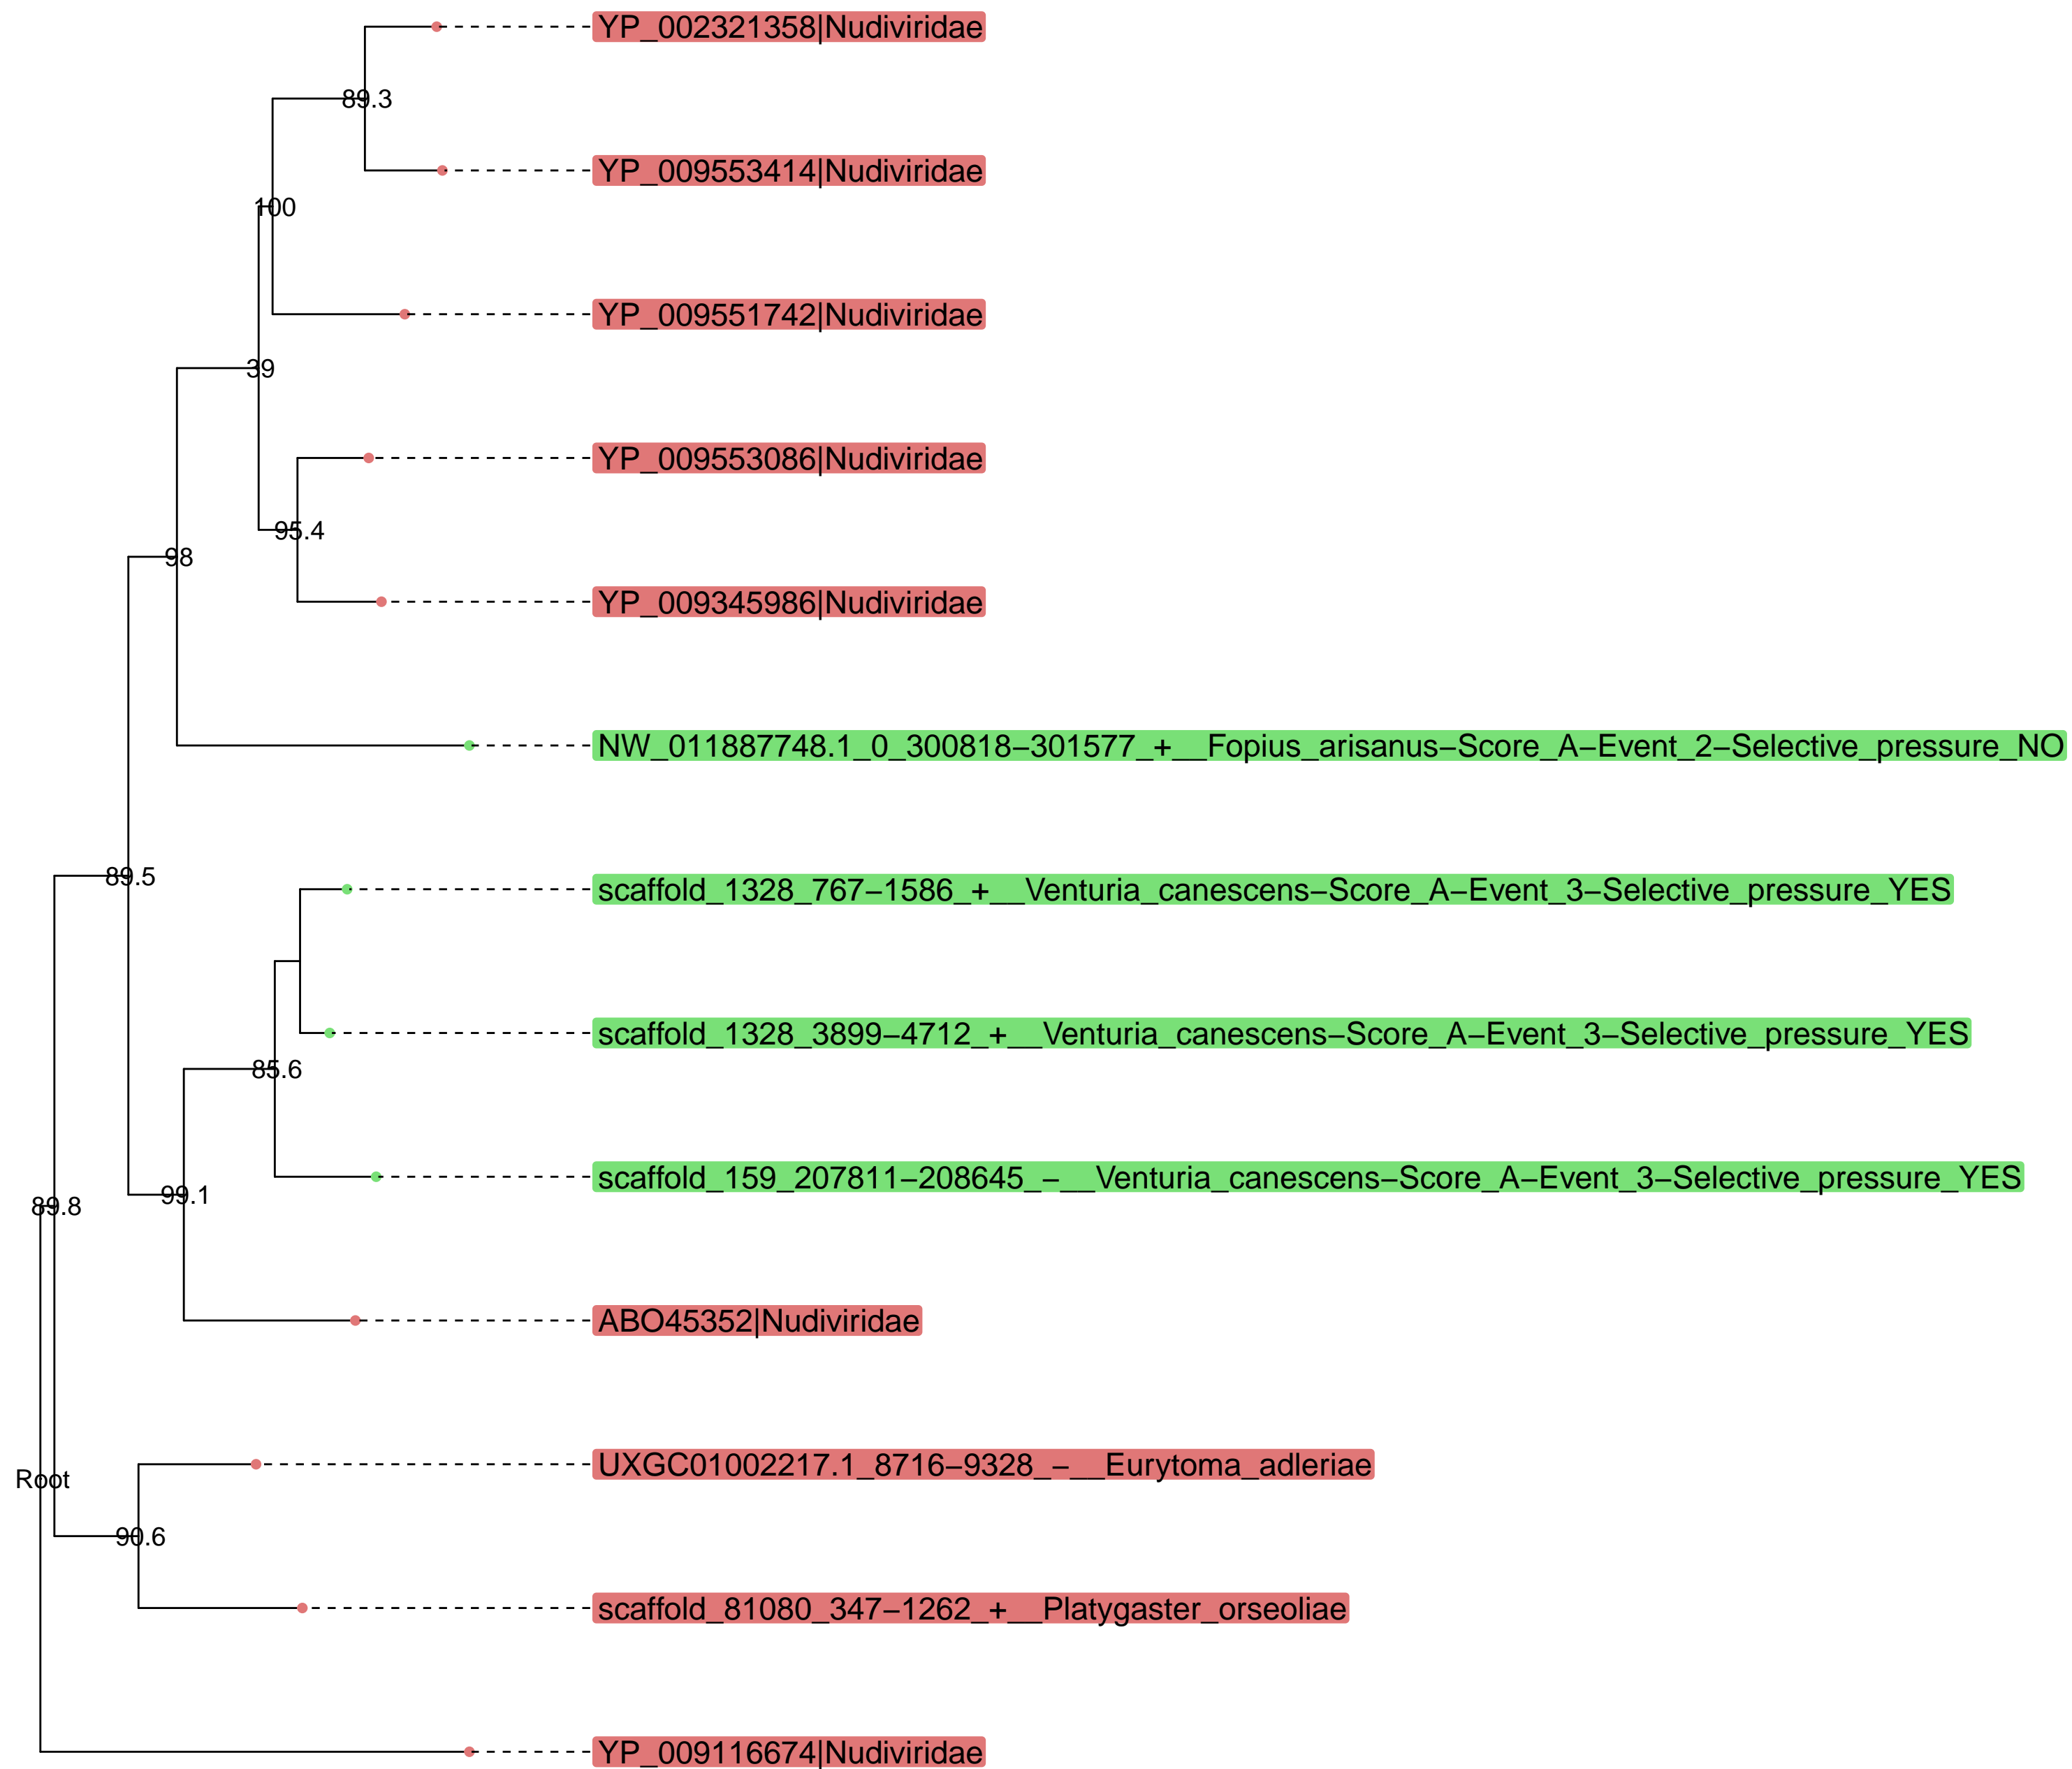

Cluster18059 – families involved : ['Nudiviridae'] – putative protein : ['GrBNV\_gp35-like protein']

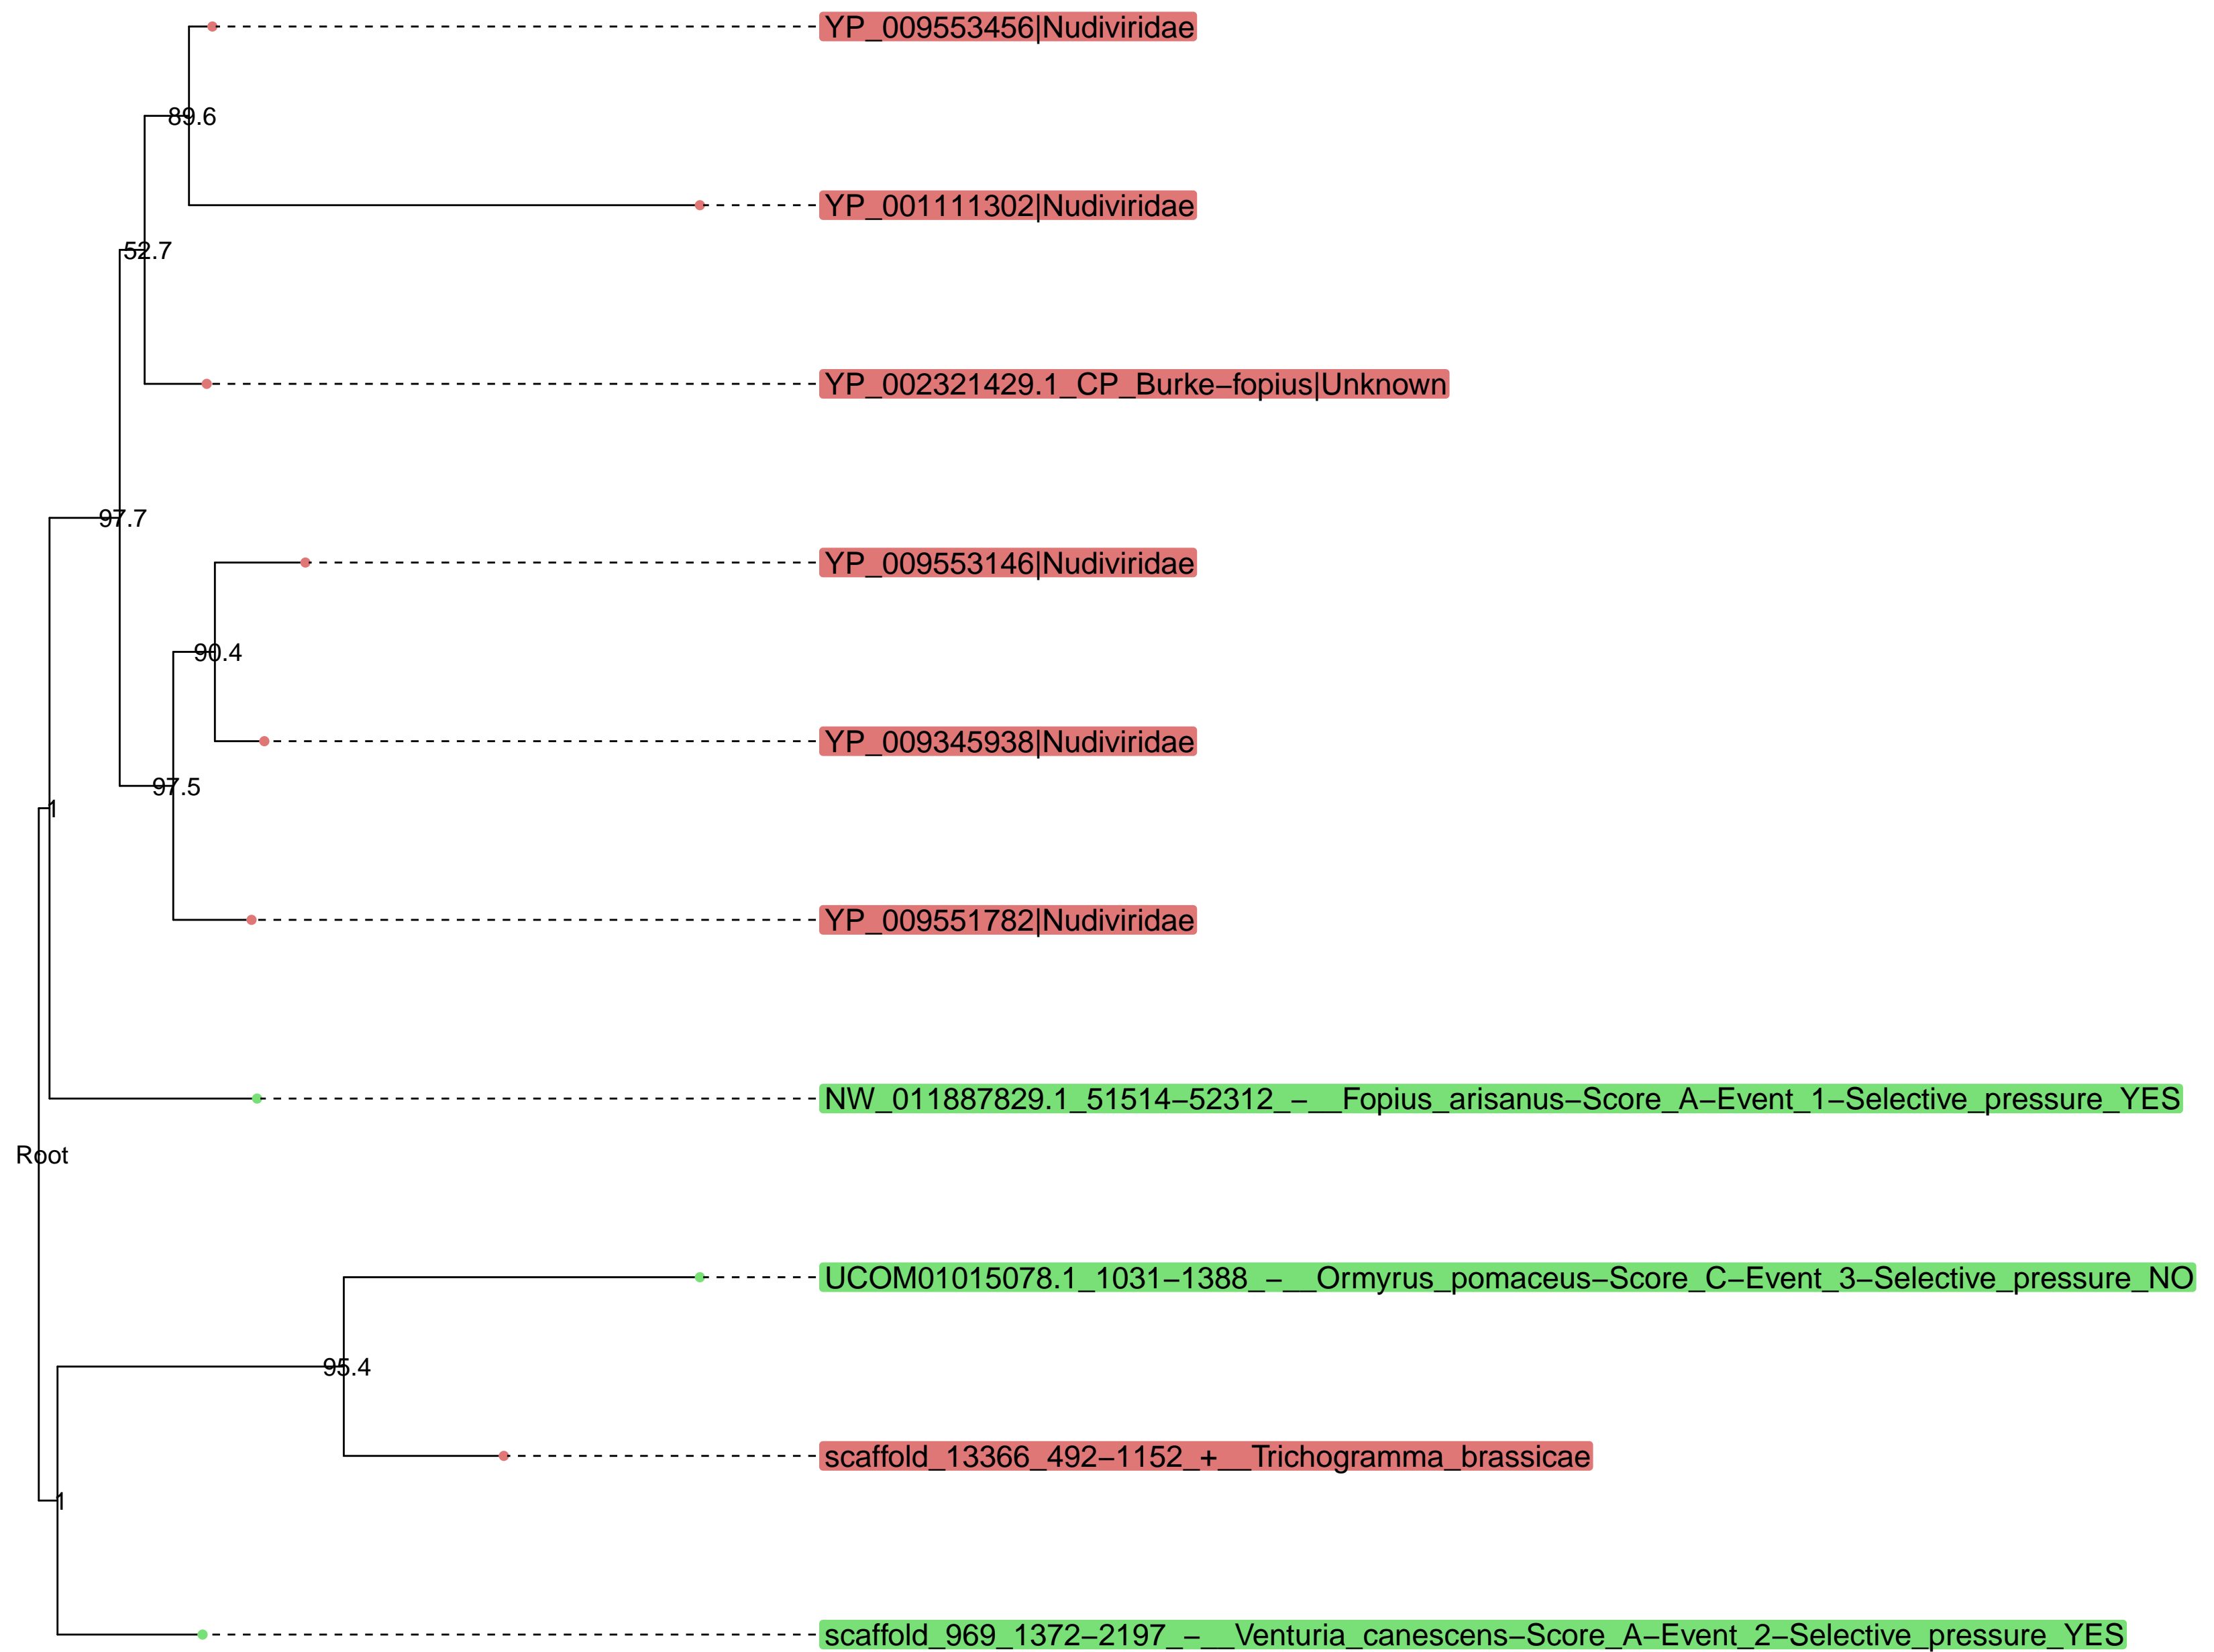

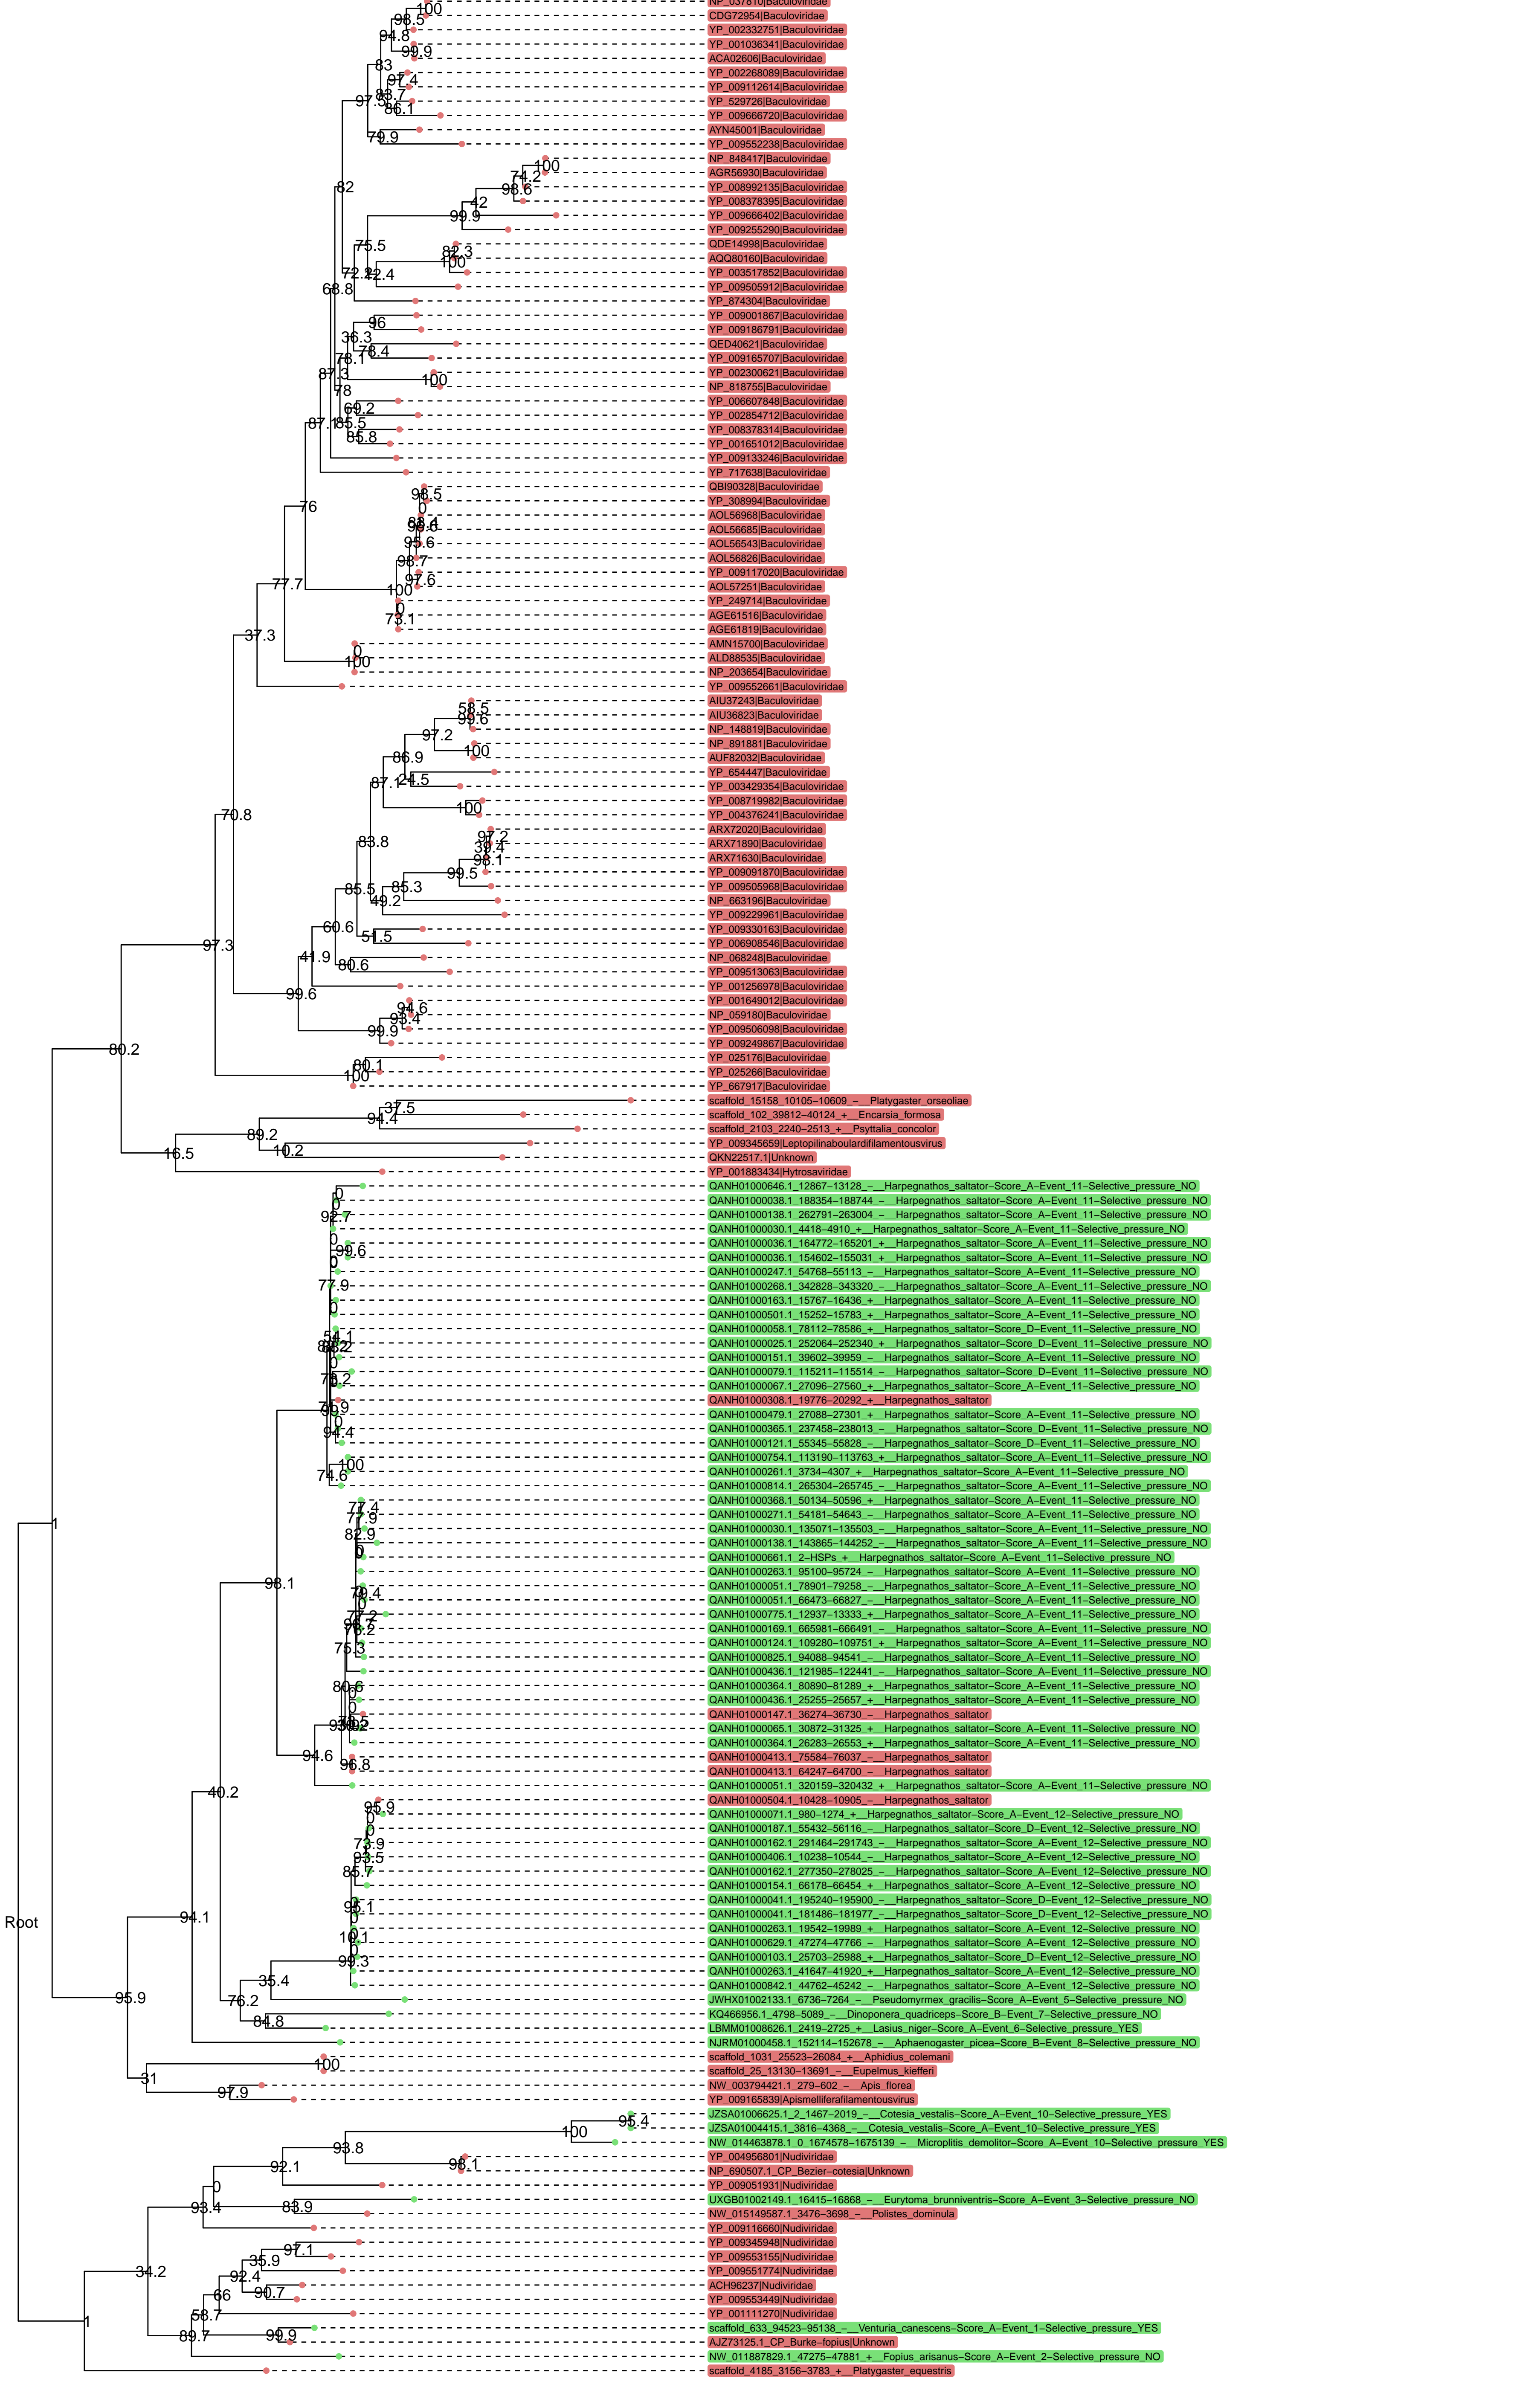

Cluster17609 – families involved : ['Nudiviridae'] – putative protein : ['Helicase']

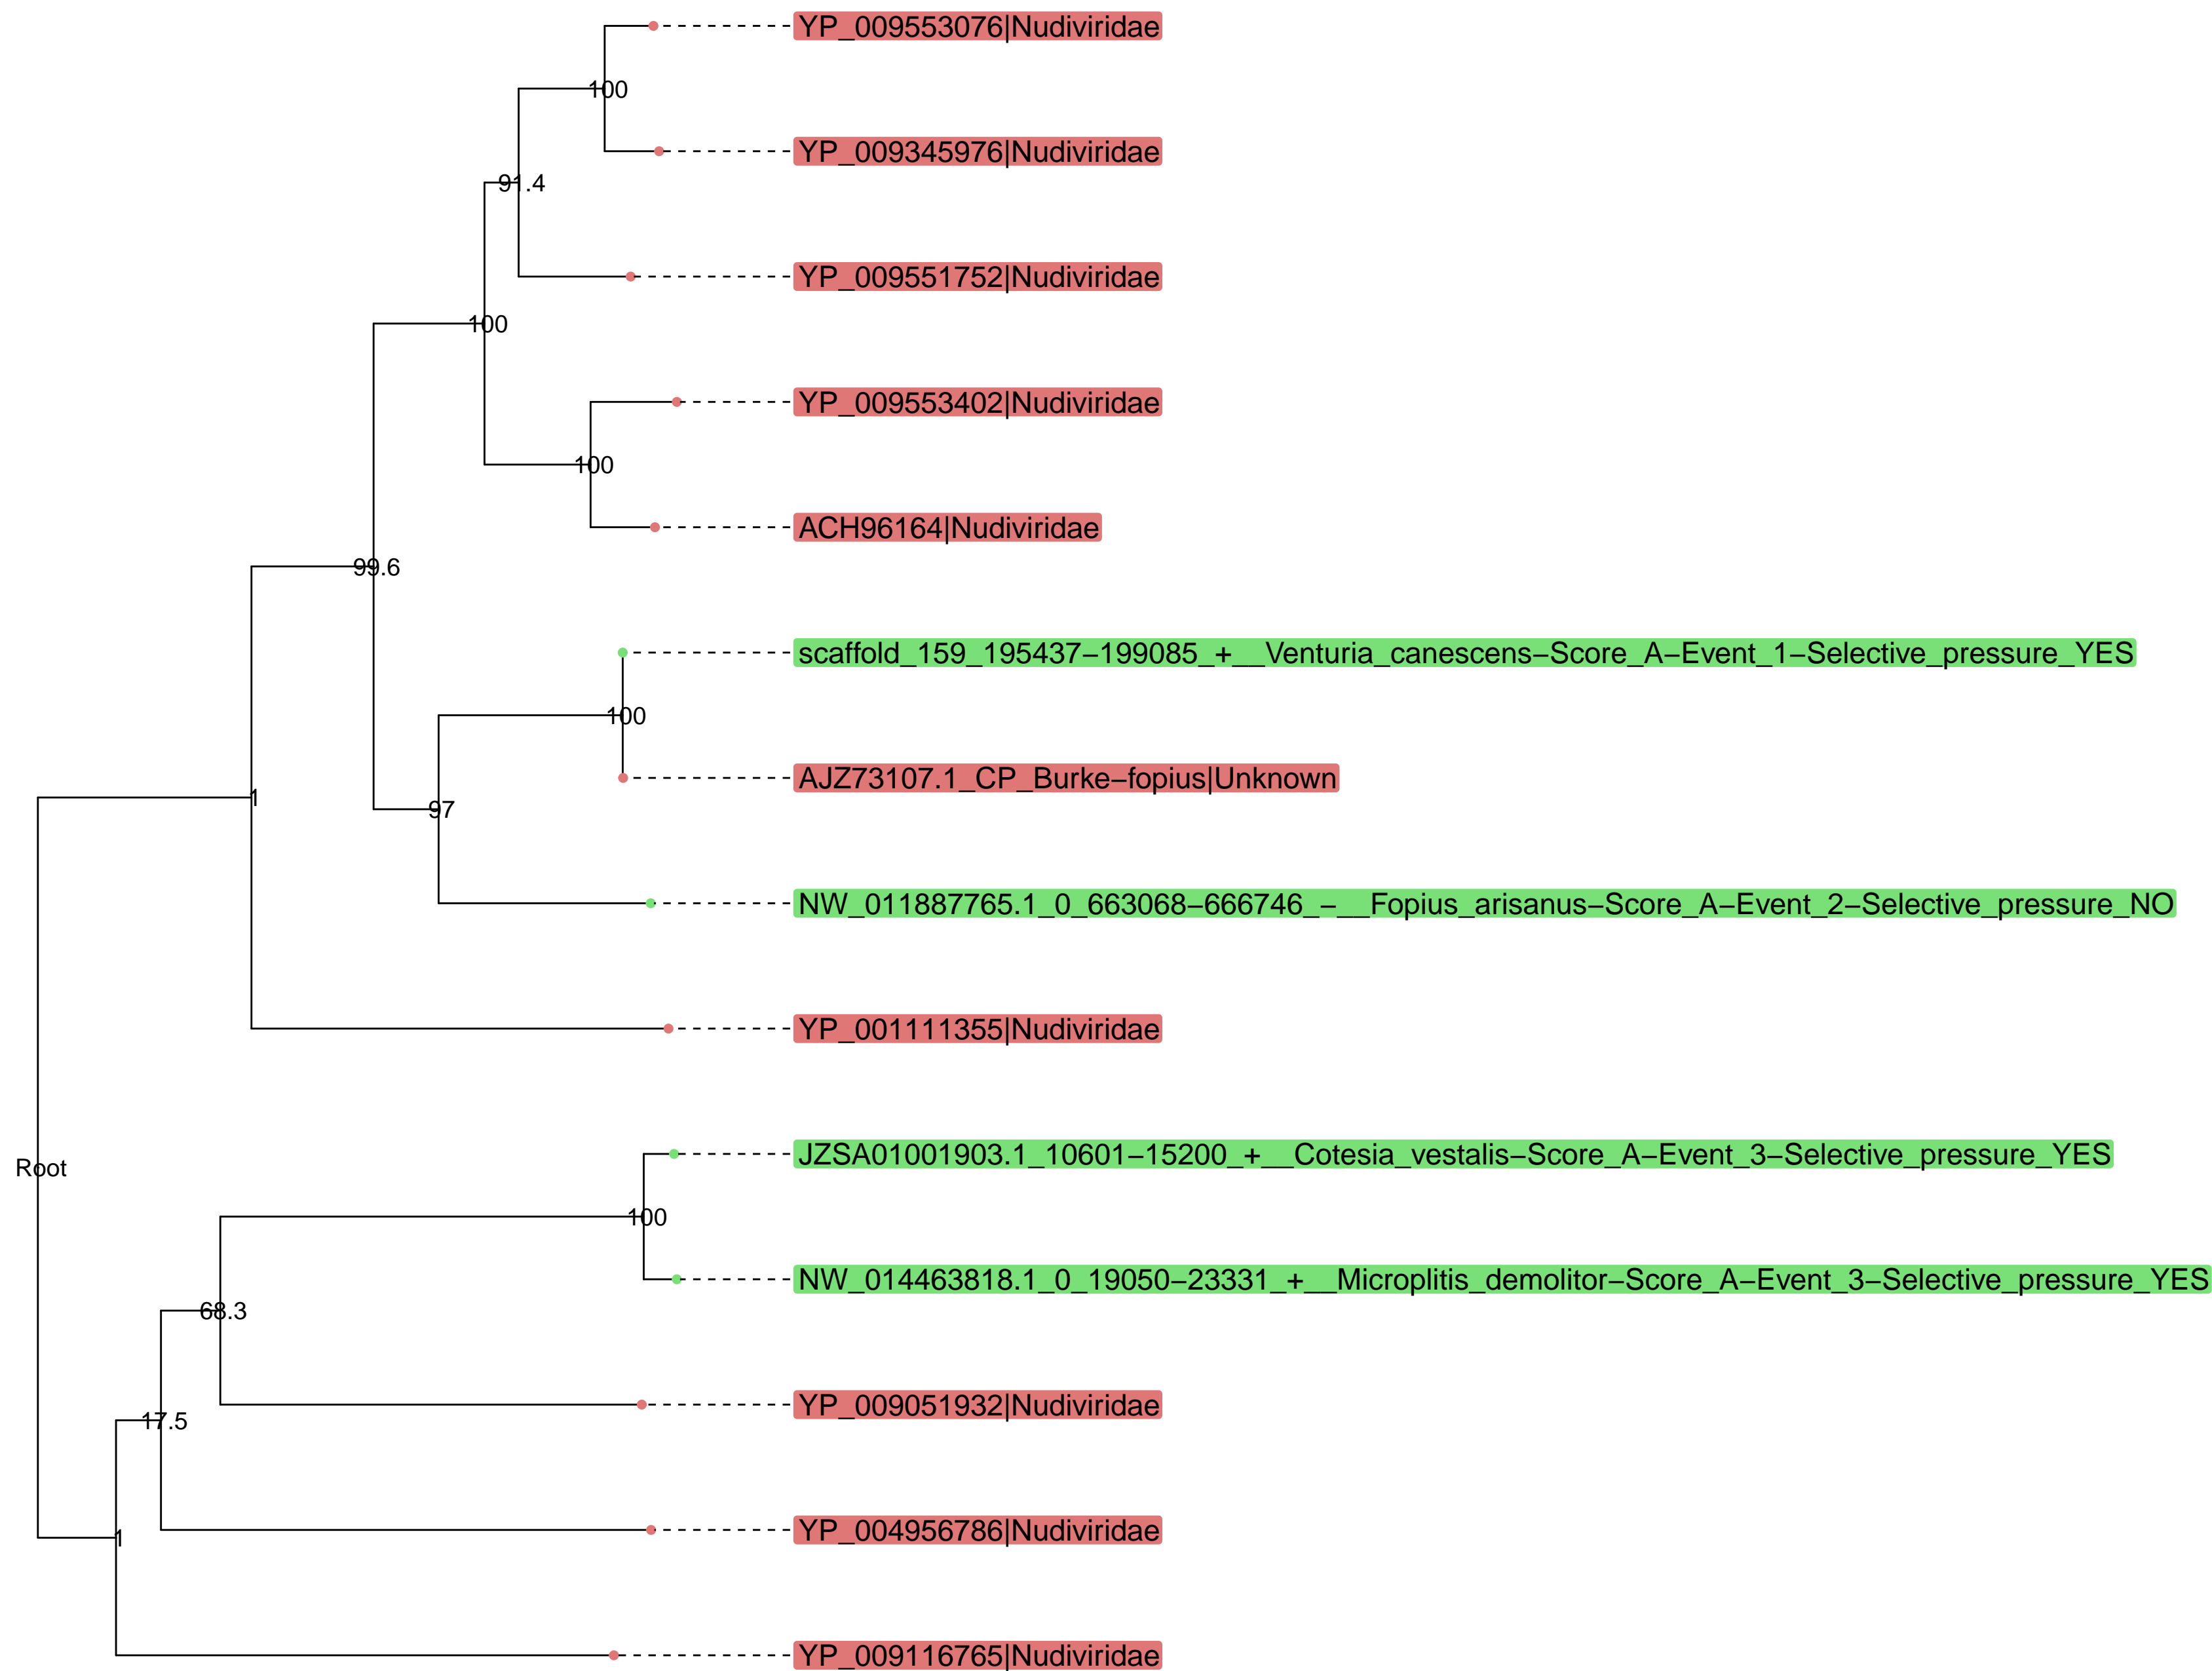

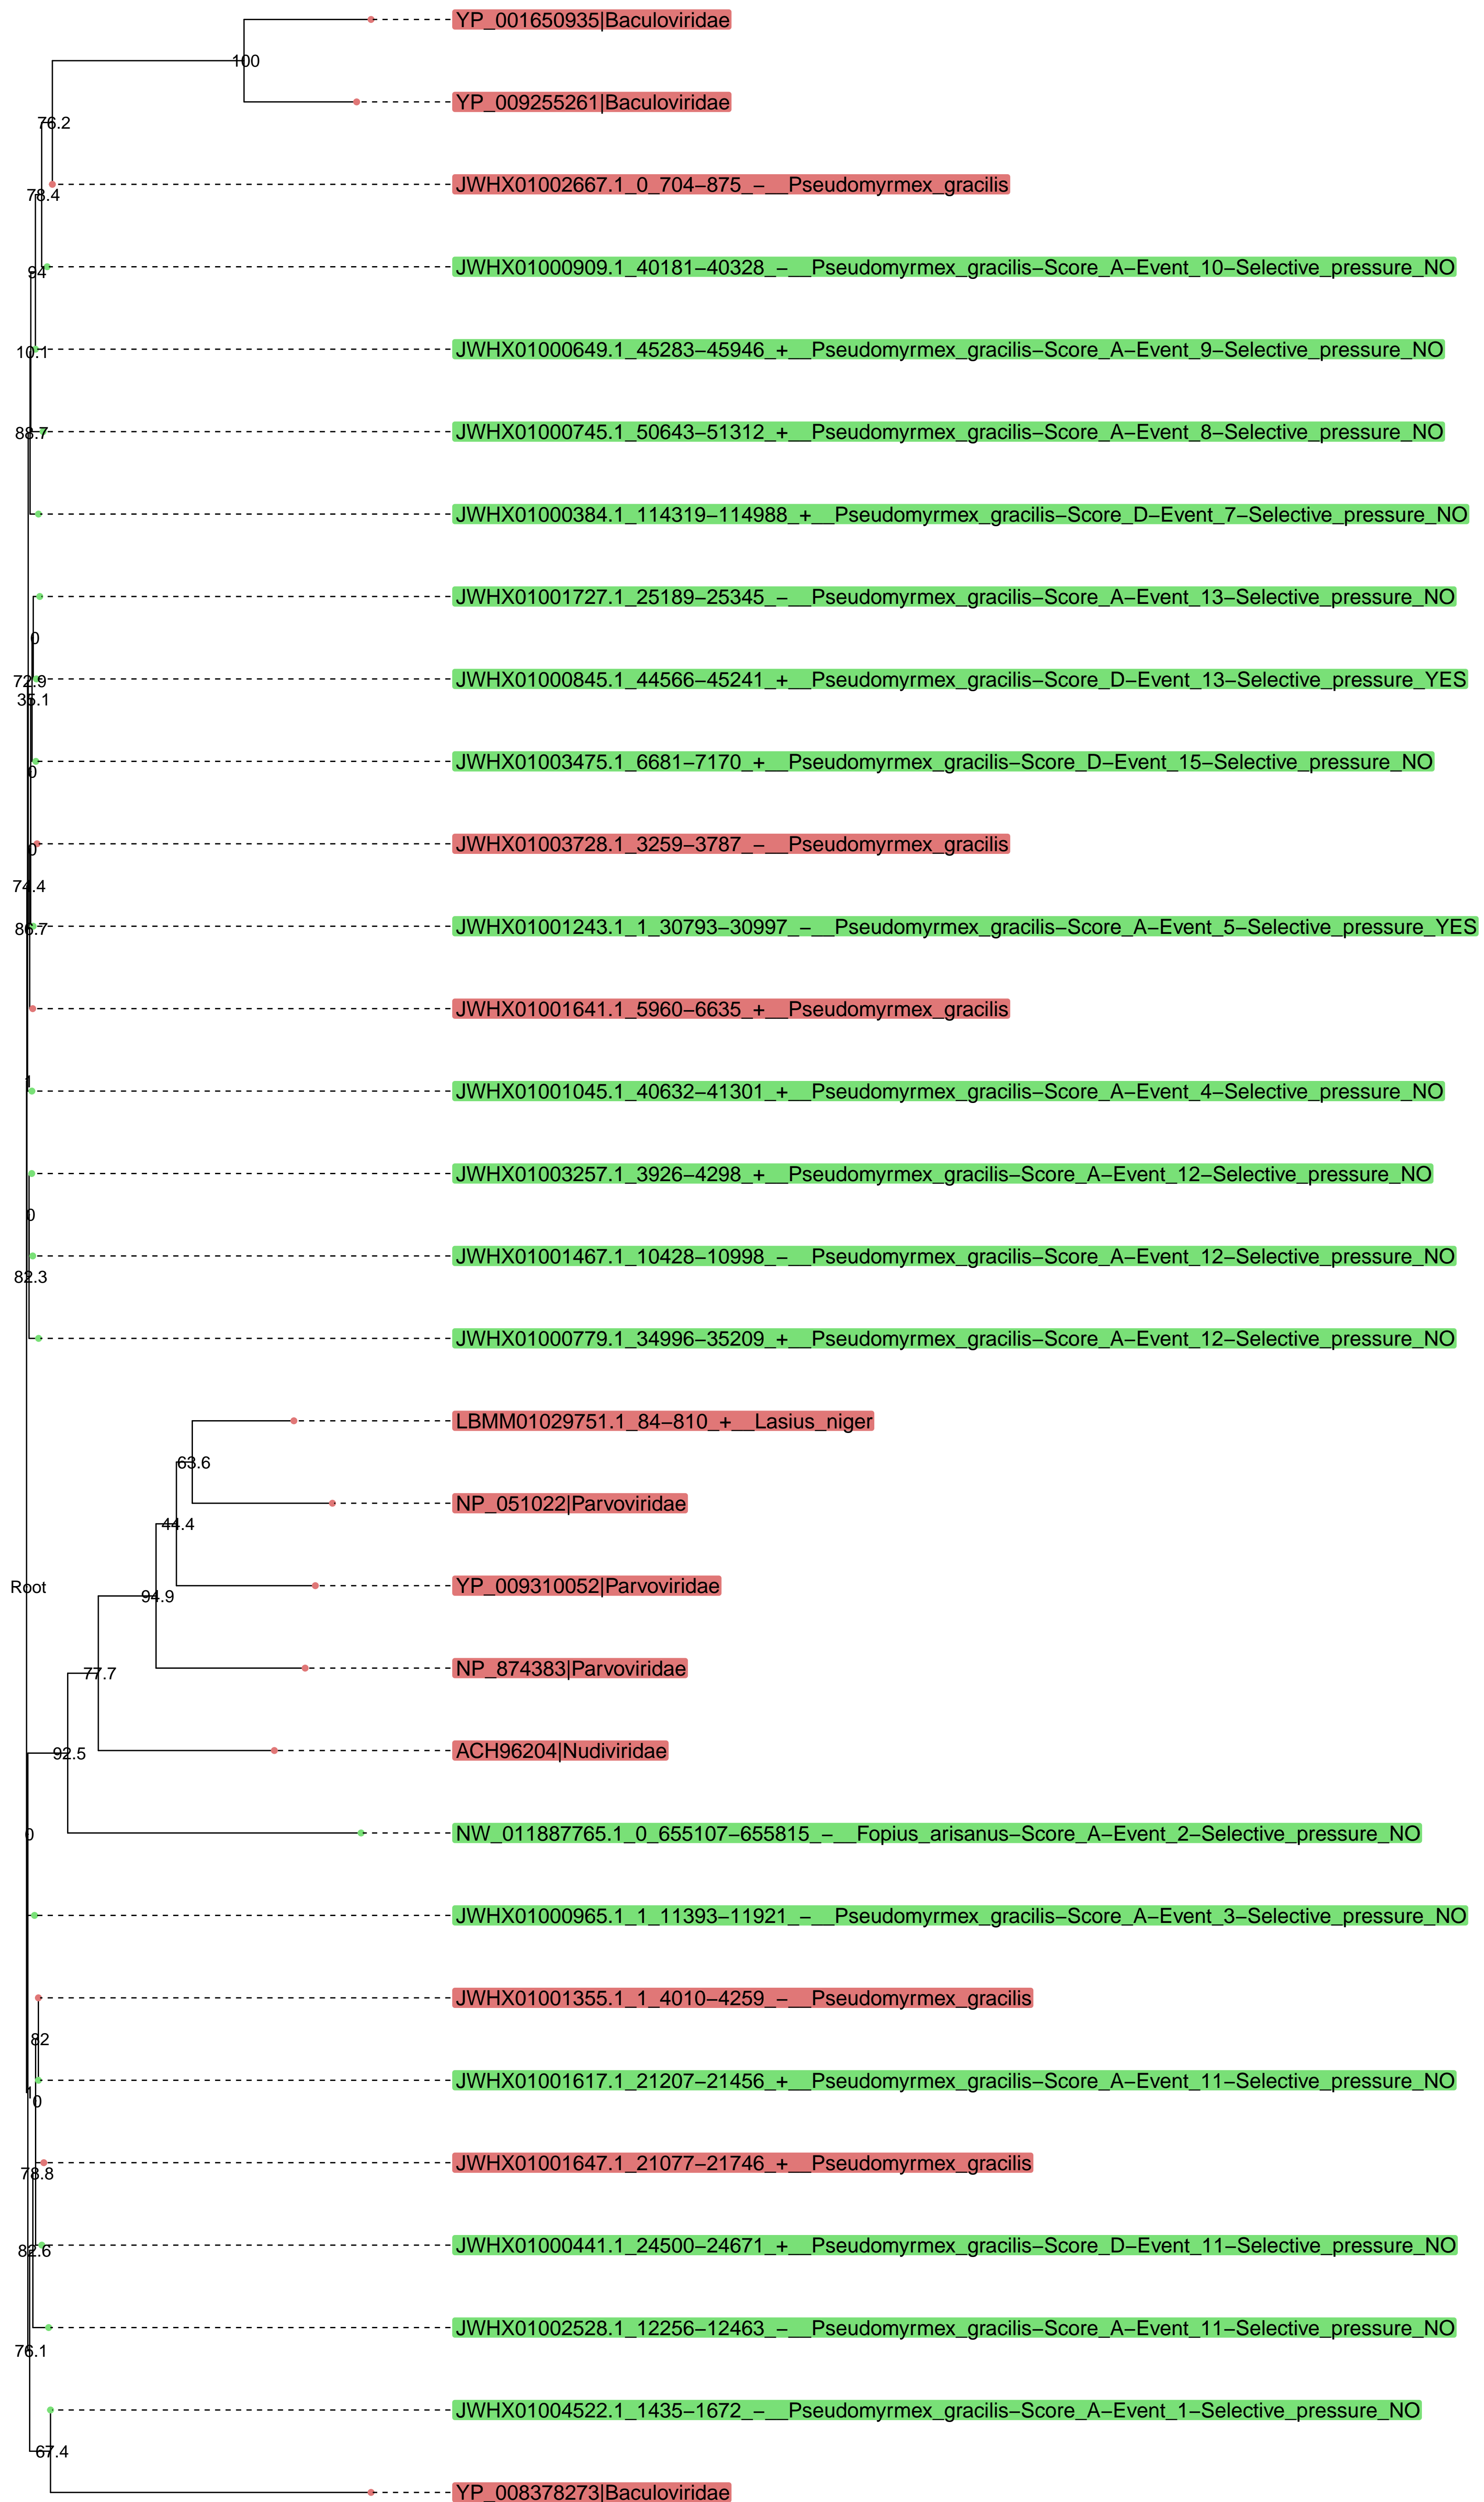

Cluster16413 – families involved : ['Nudiviridae'] – putative protein : ['GrBNV\_gp76-like protein']

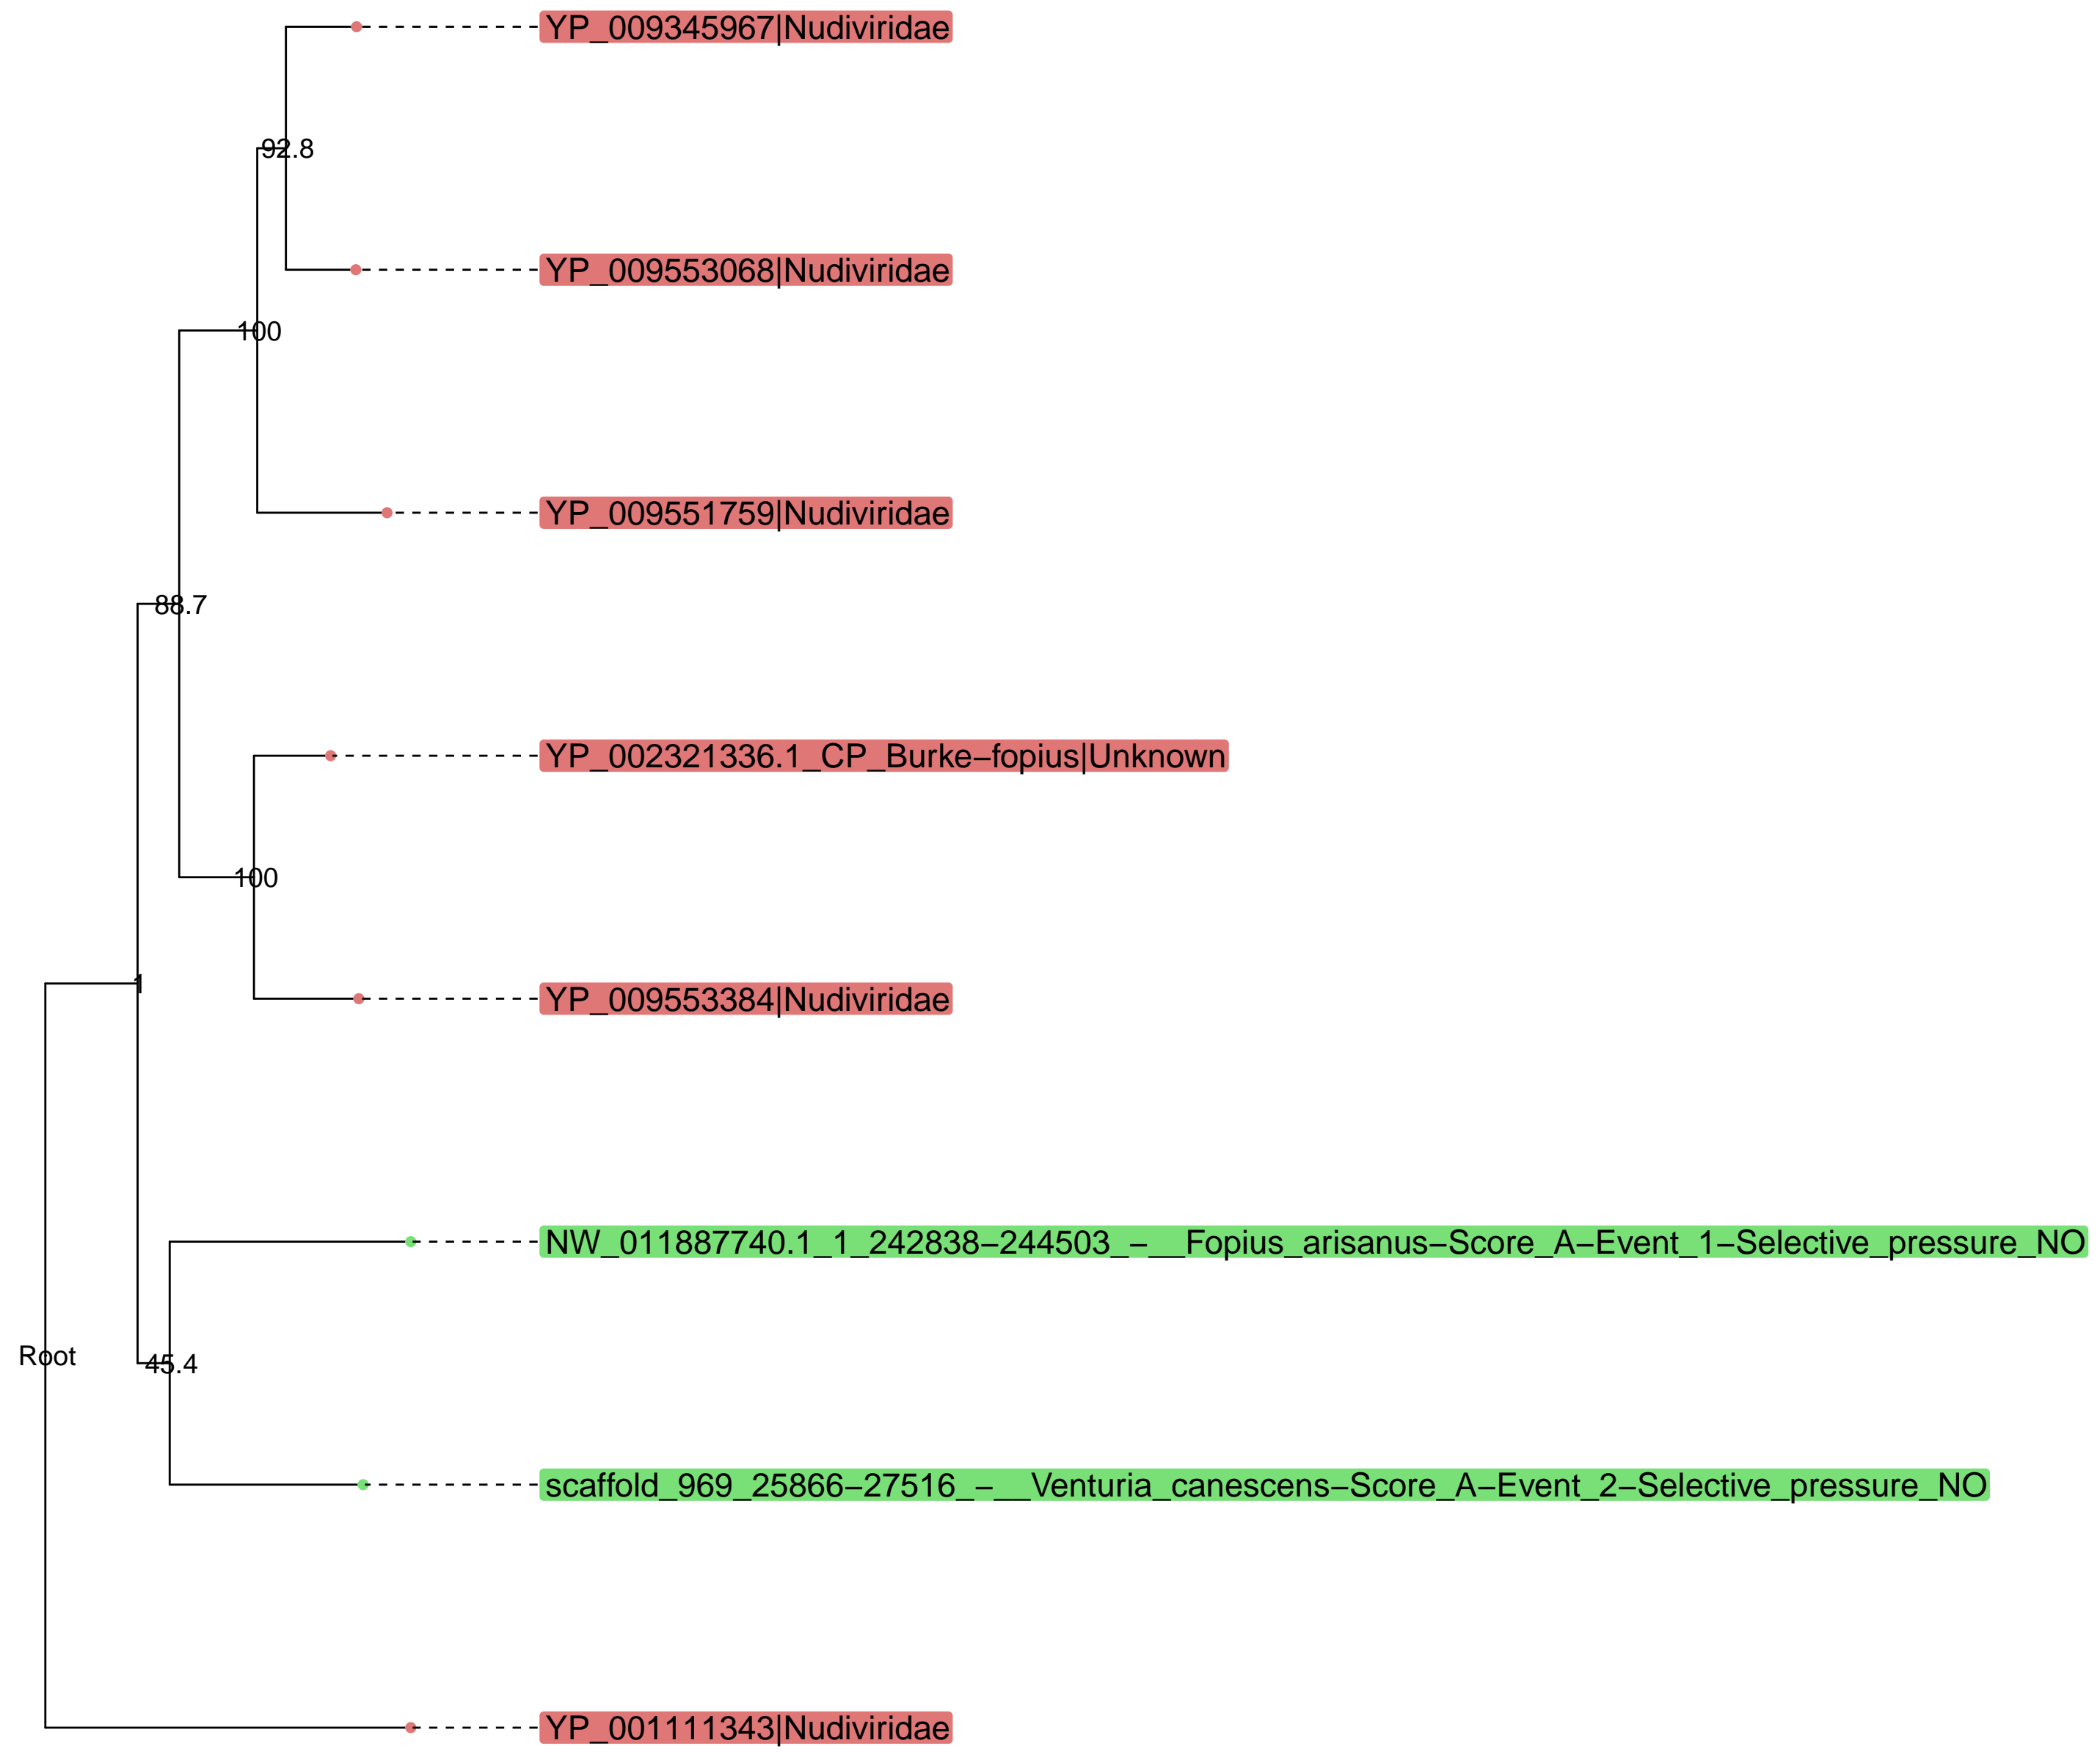

Cluster15164 – families involved : ['Nudiviridae'] – putative protein : ['LEF-9']

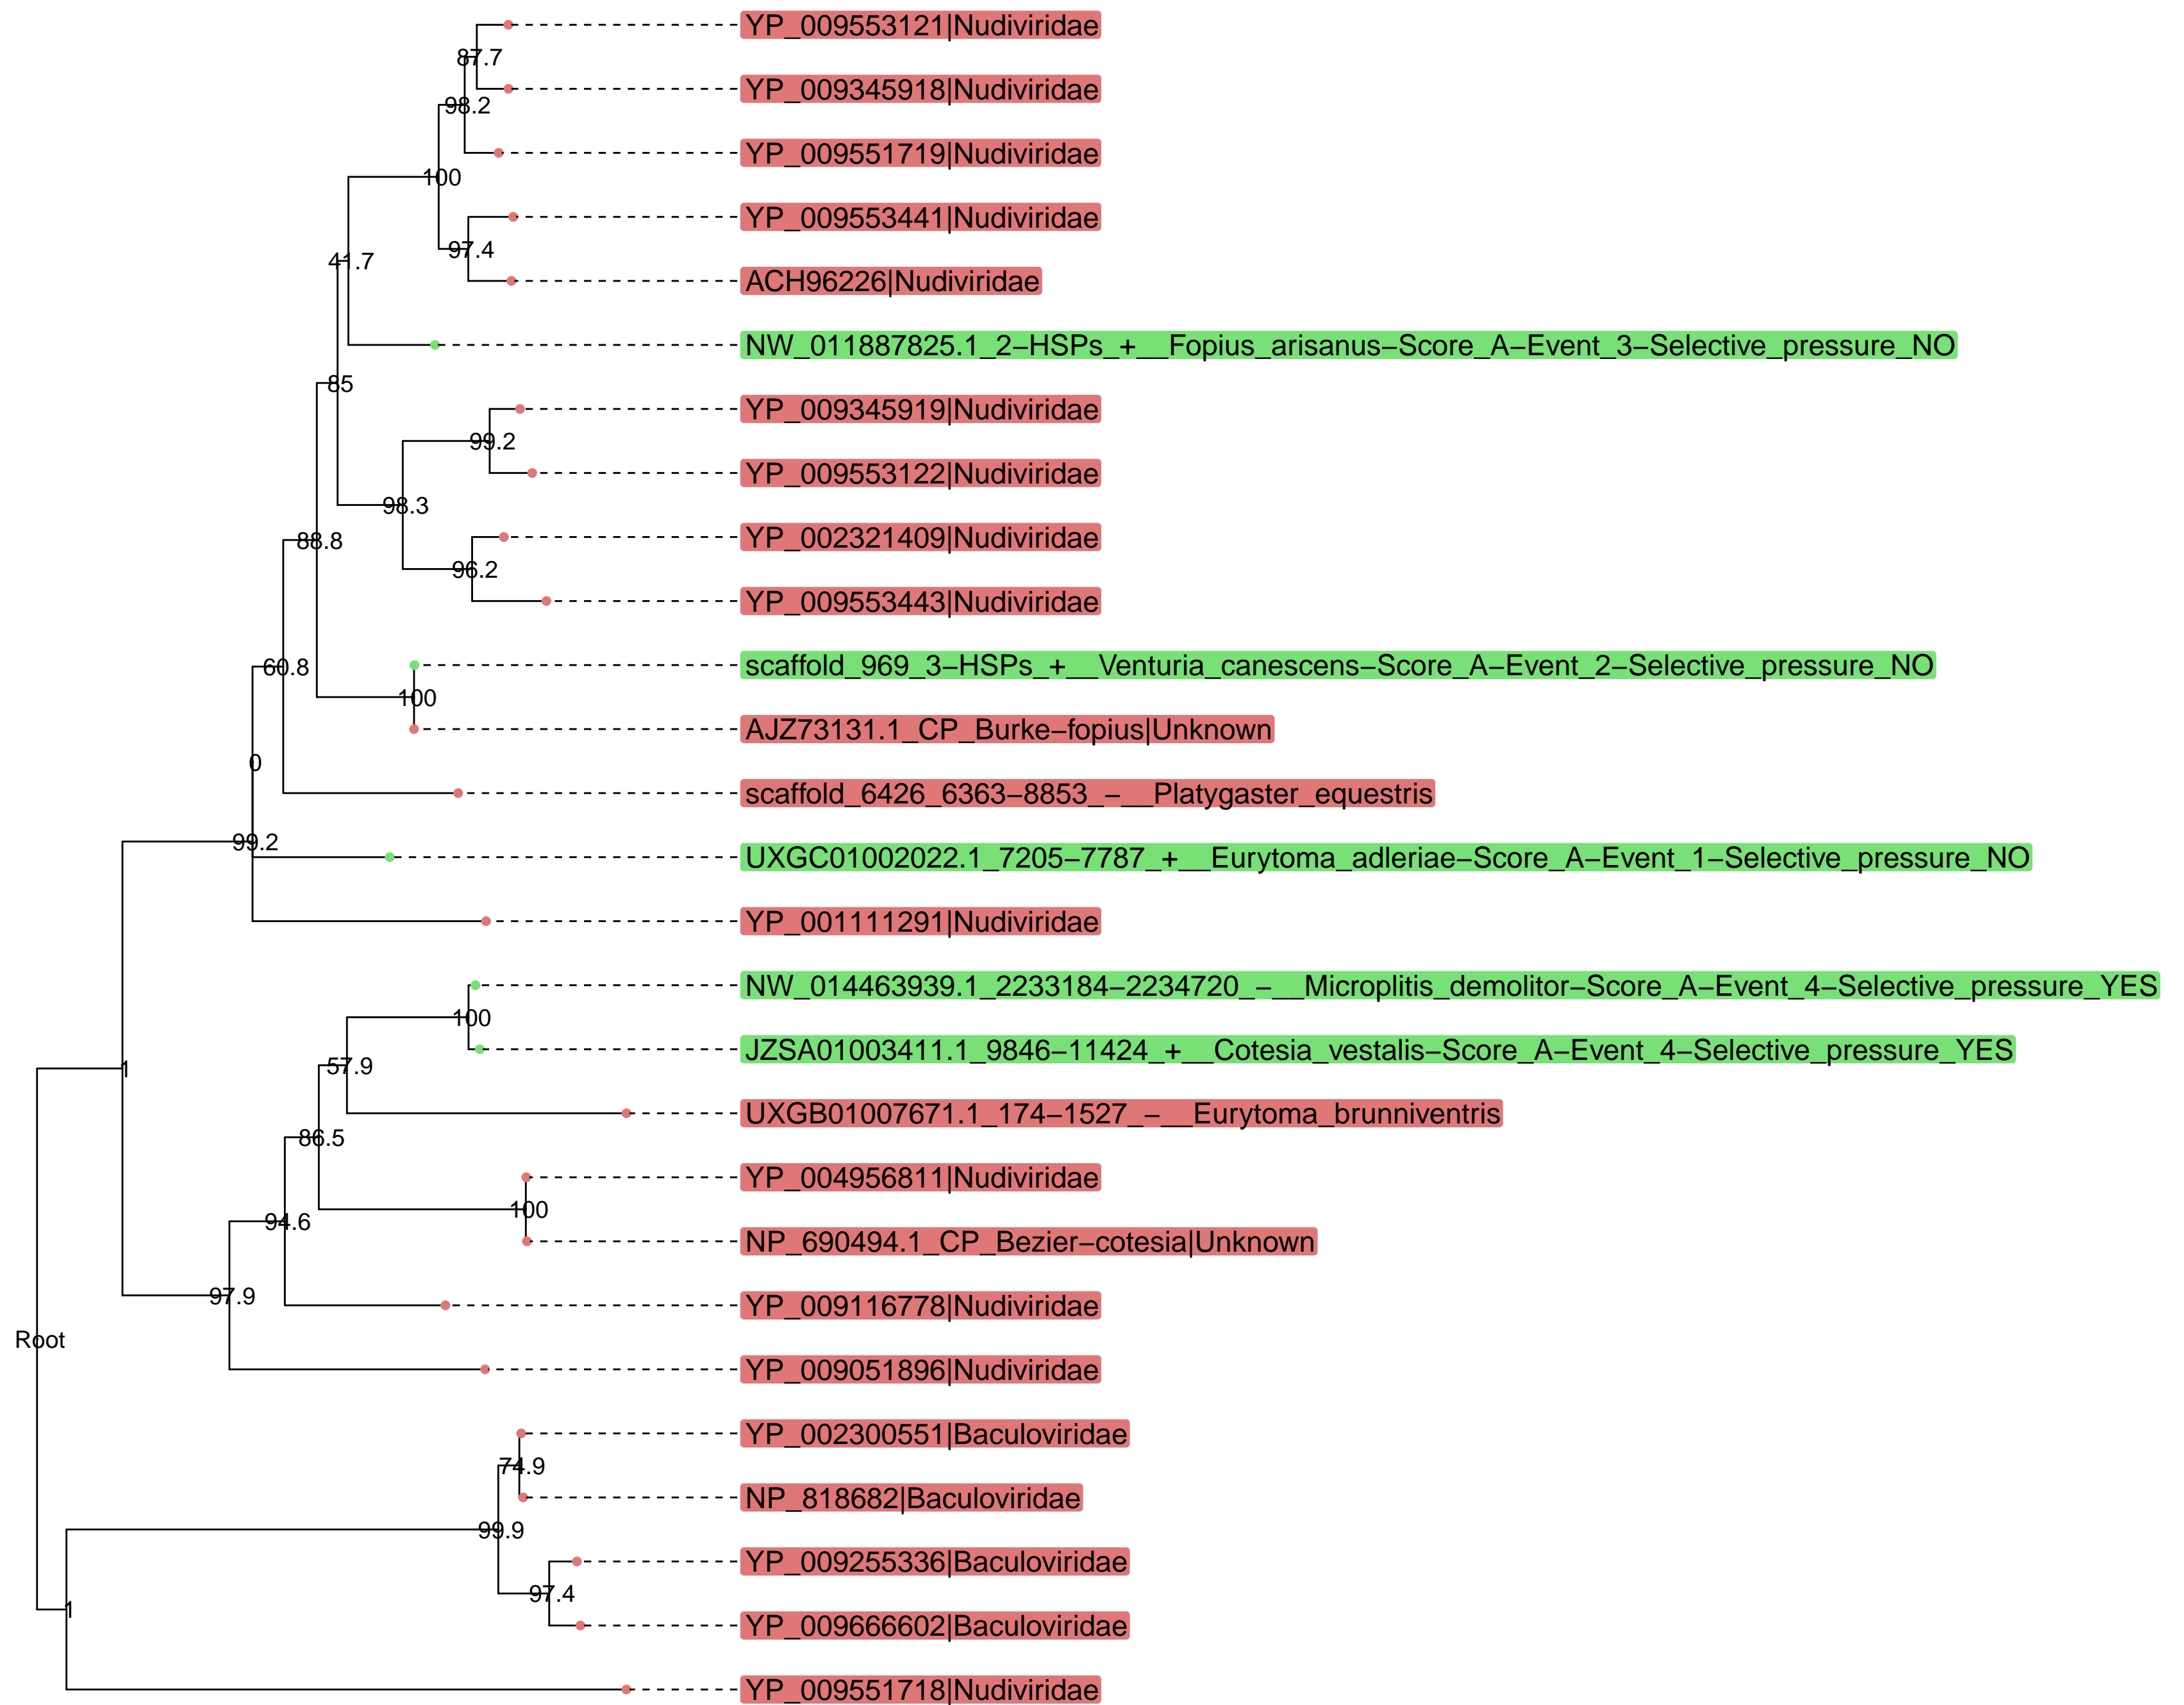

Cluster12087 – families involved : ['Nudiviridae'] – putative protein : ['Lef-5']

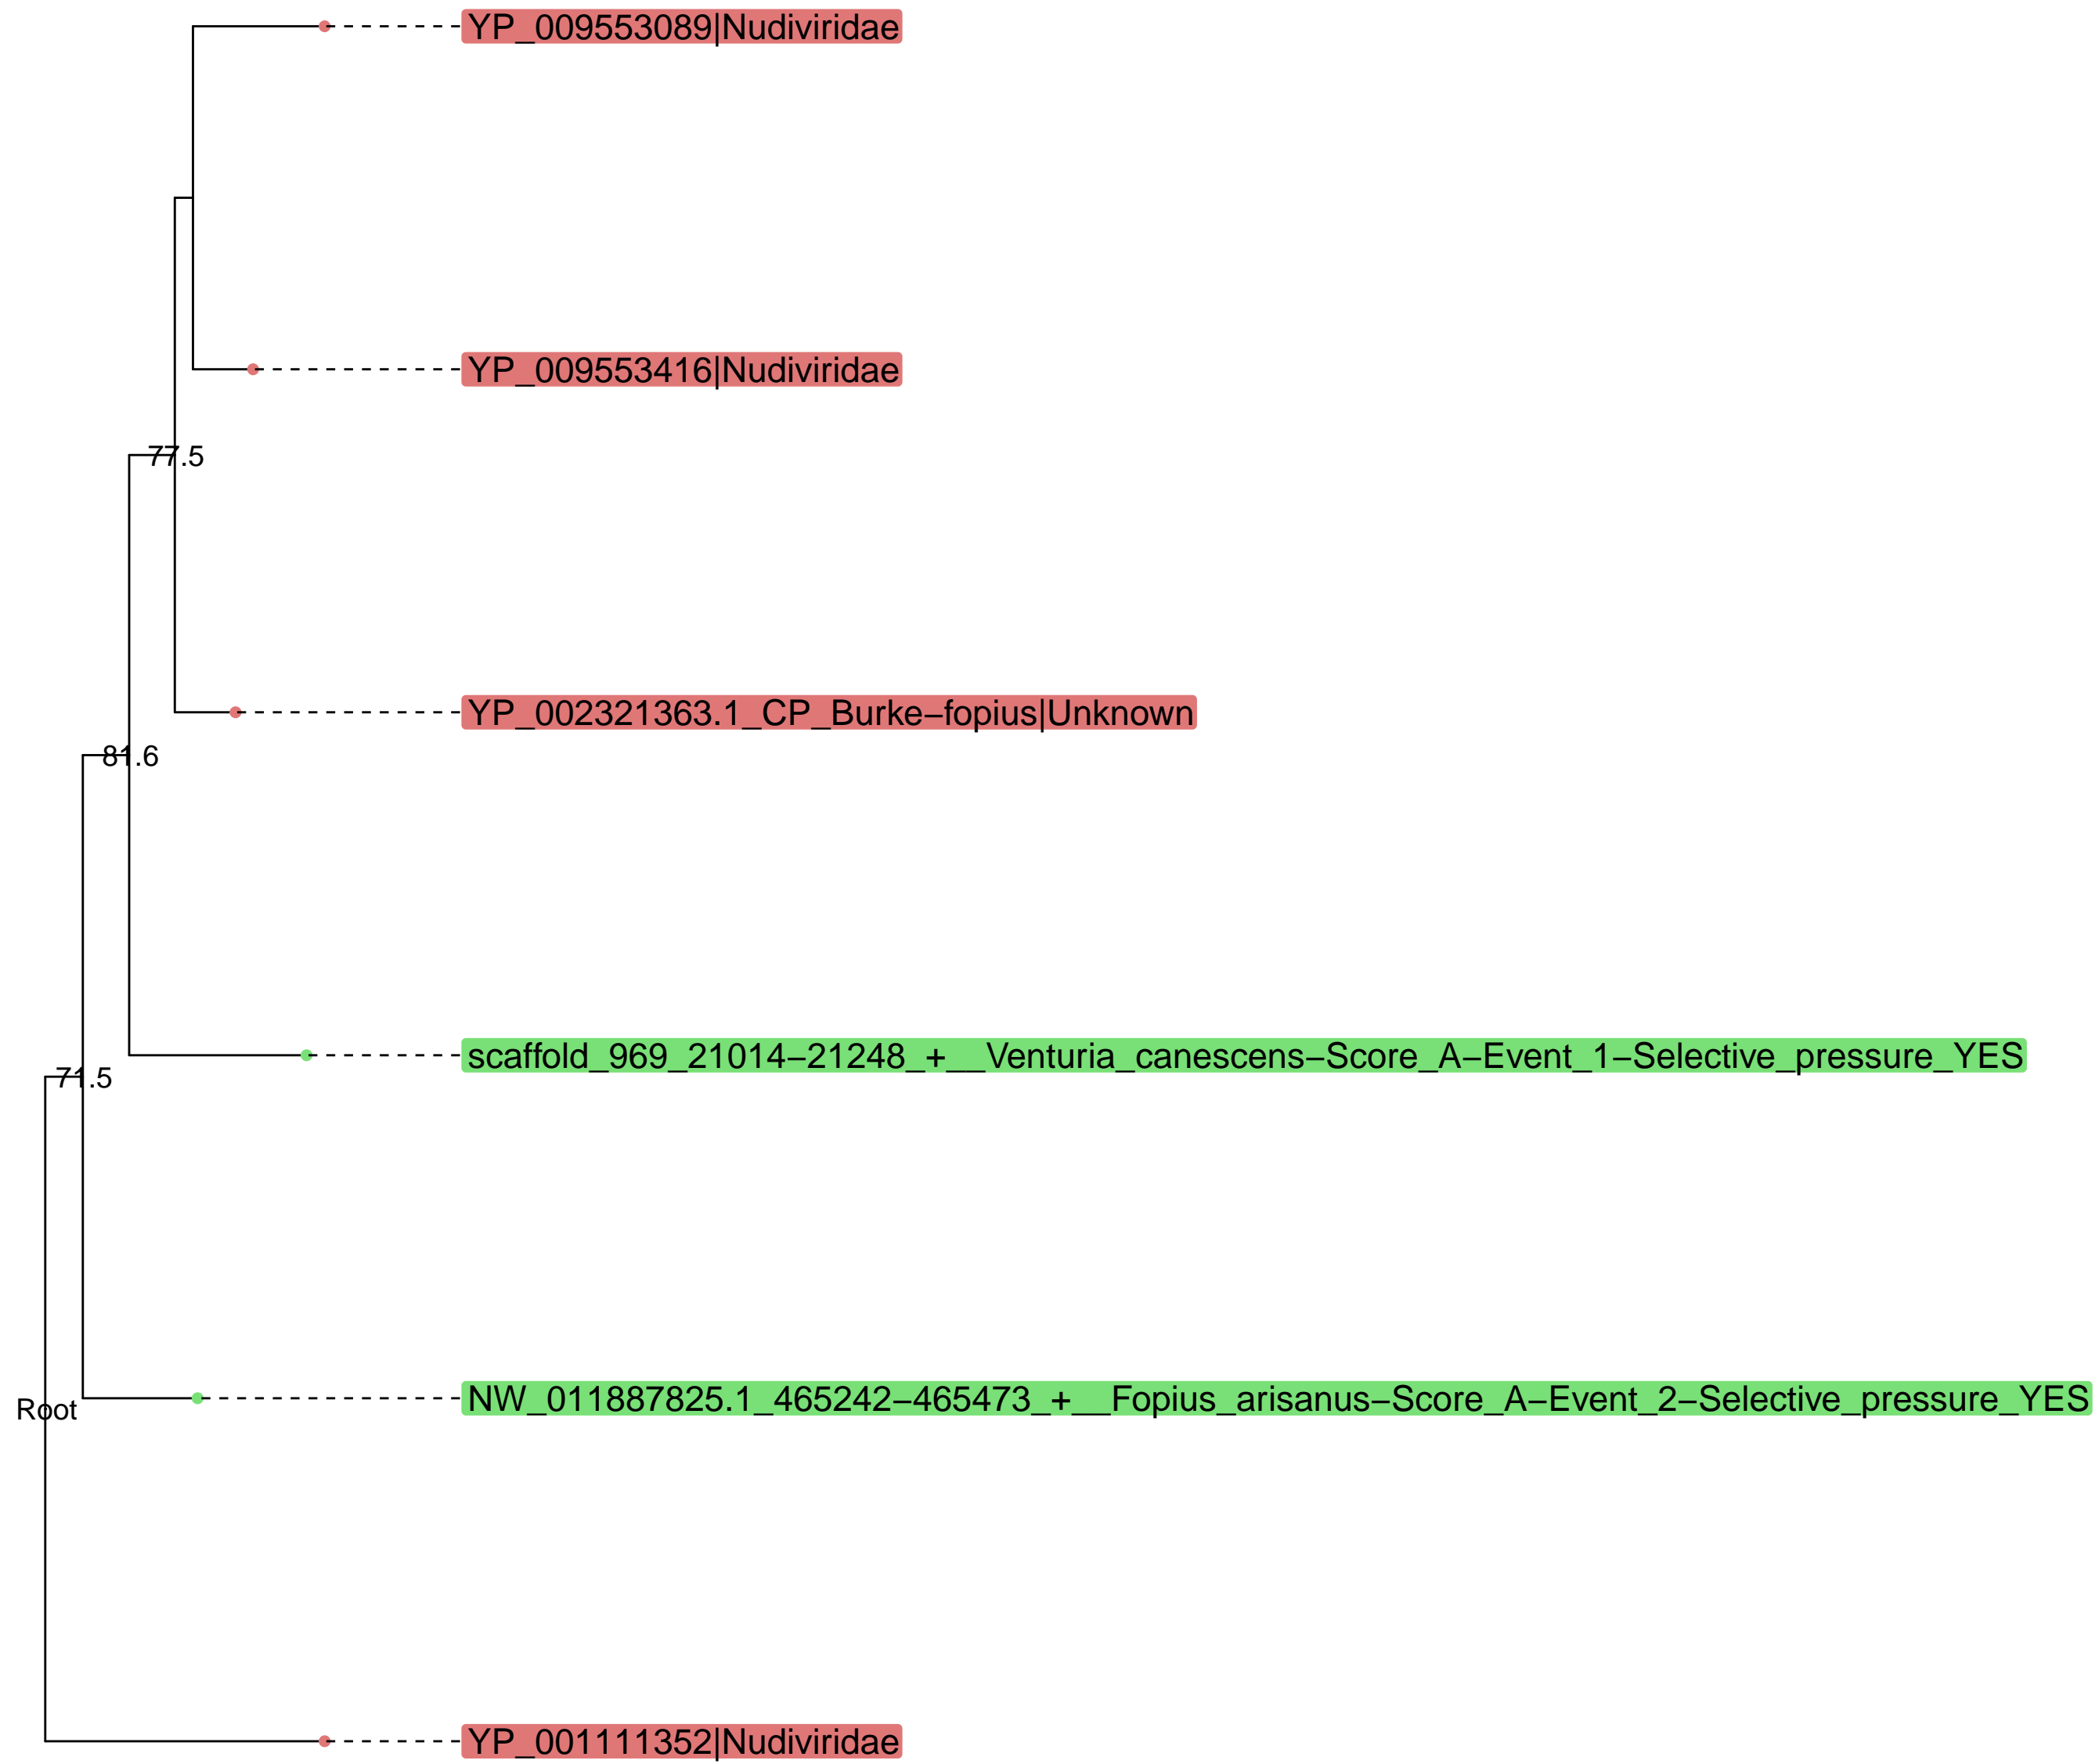



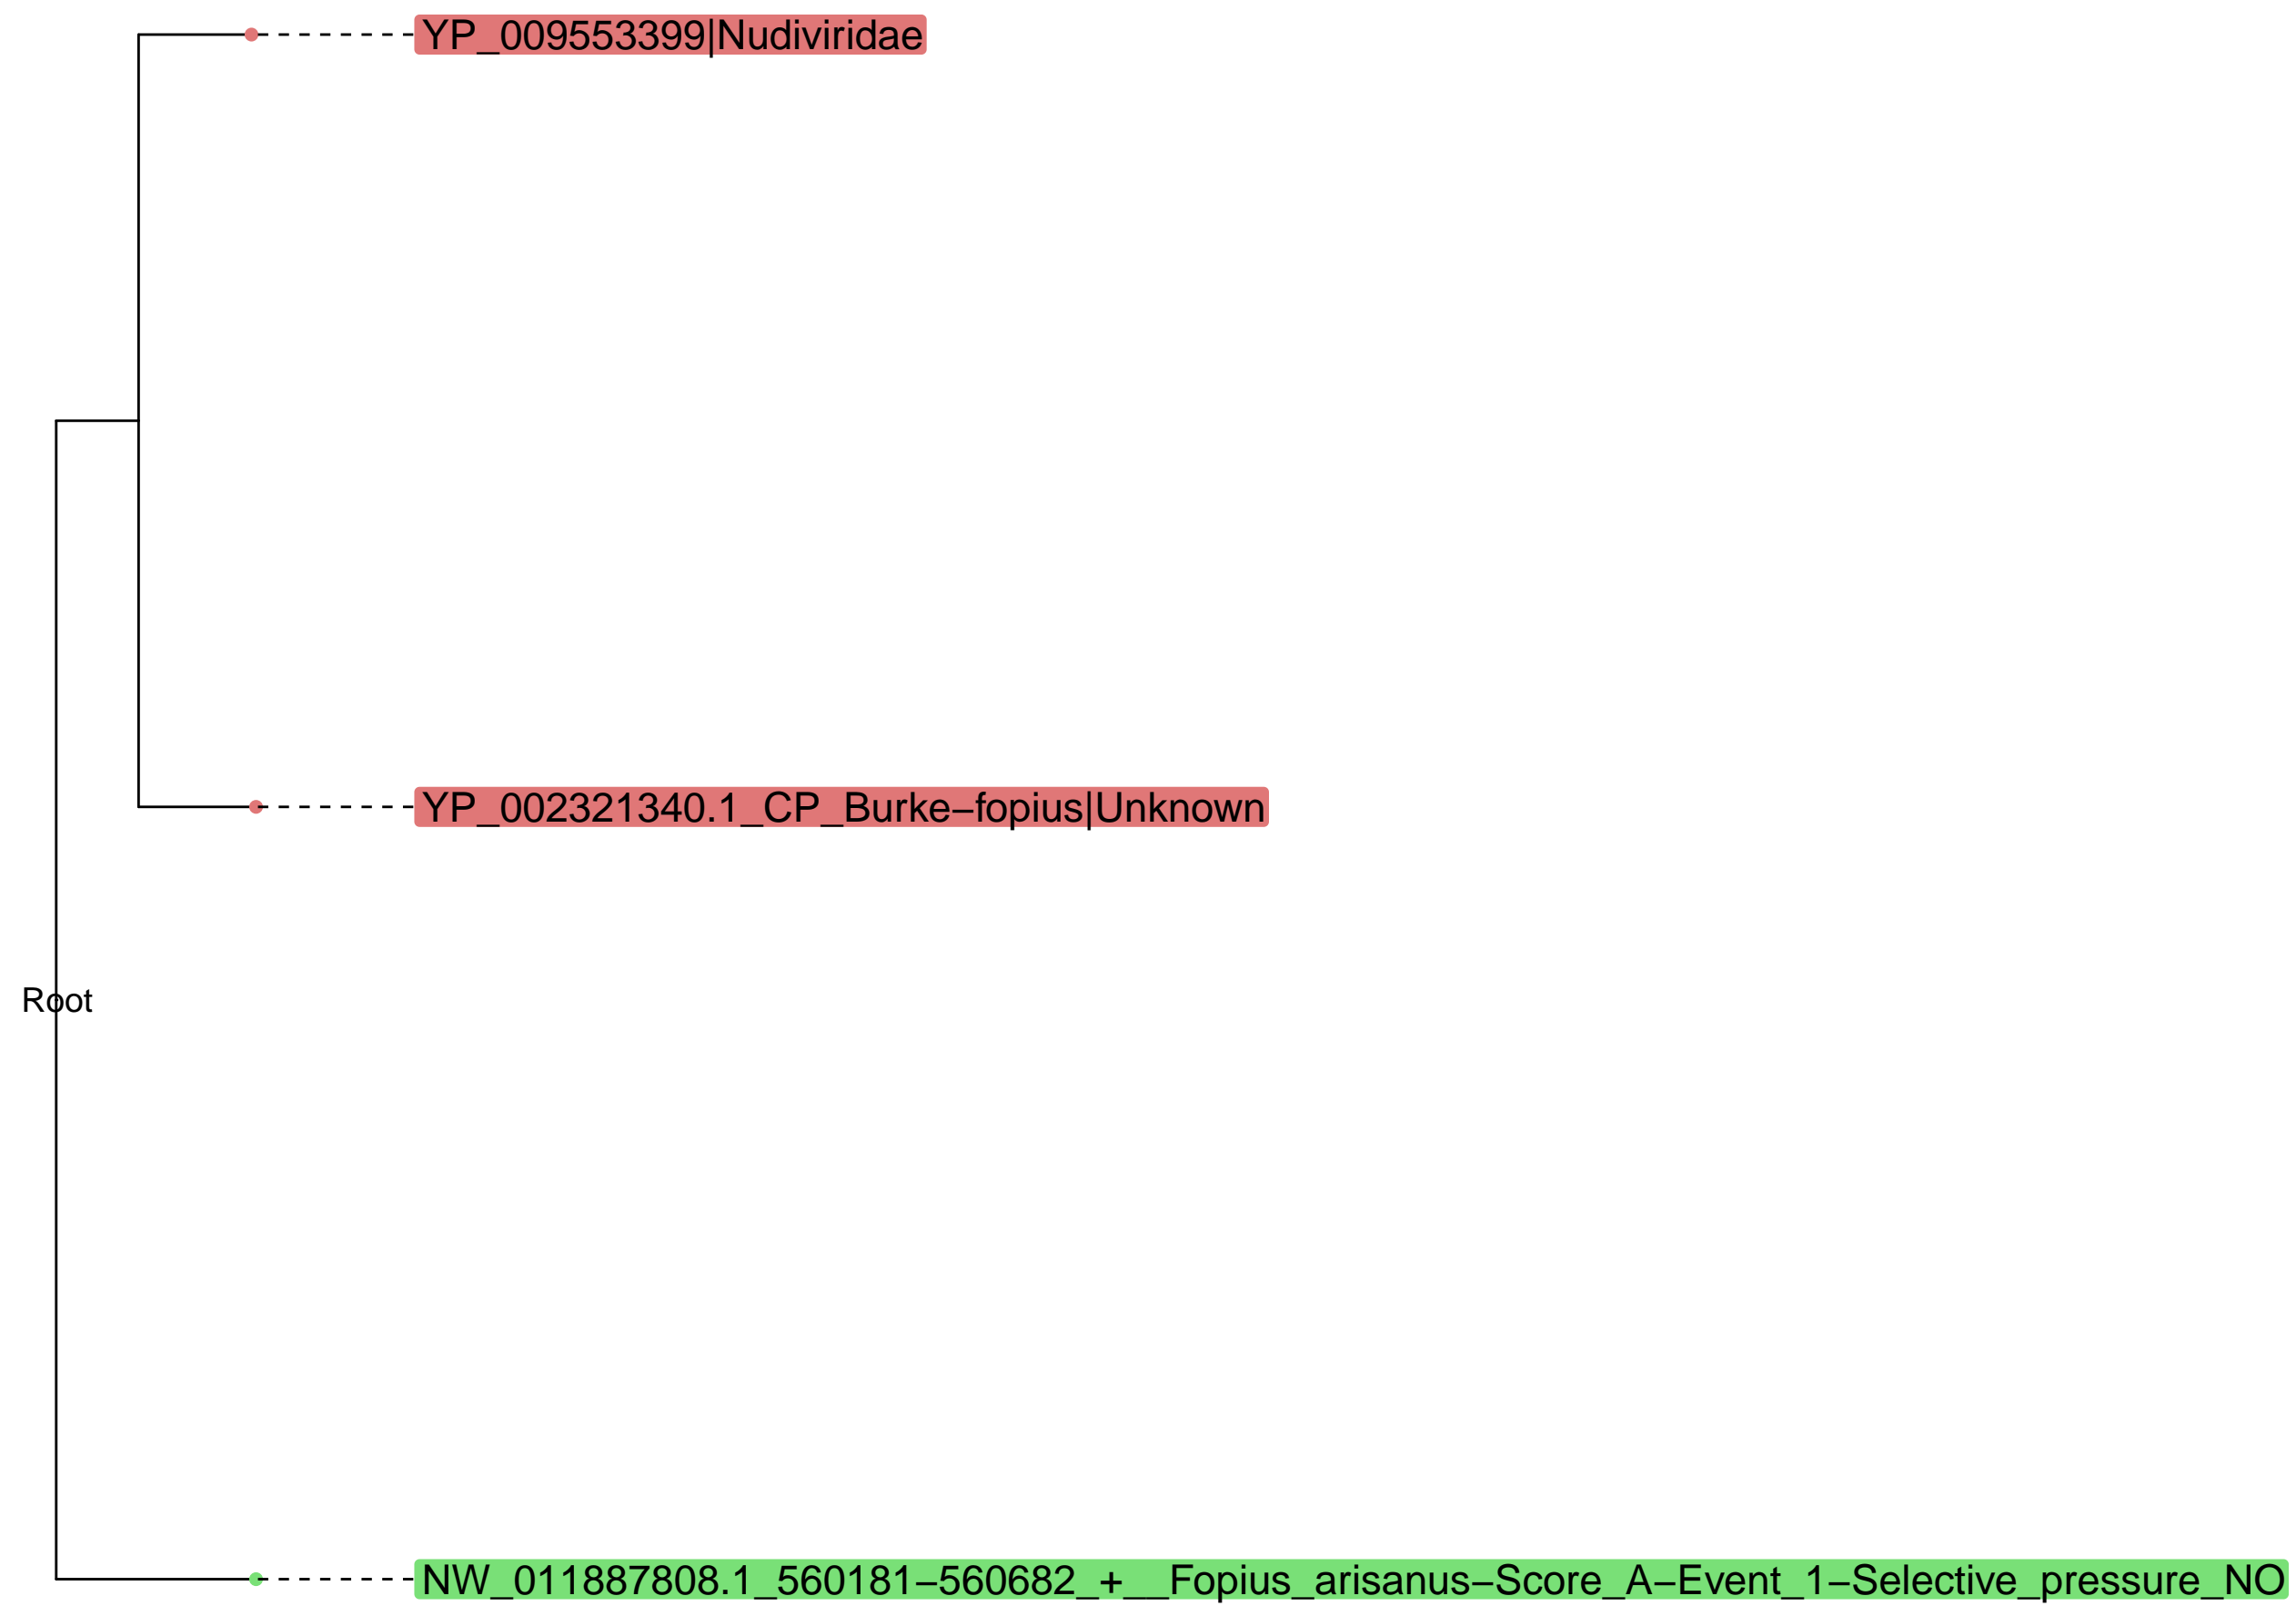

Cluster11825 – families involved : ['Nudiviridae'] – putative protein : ['GrBNV\_gp58-like protein']

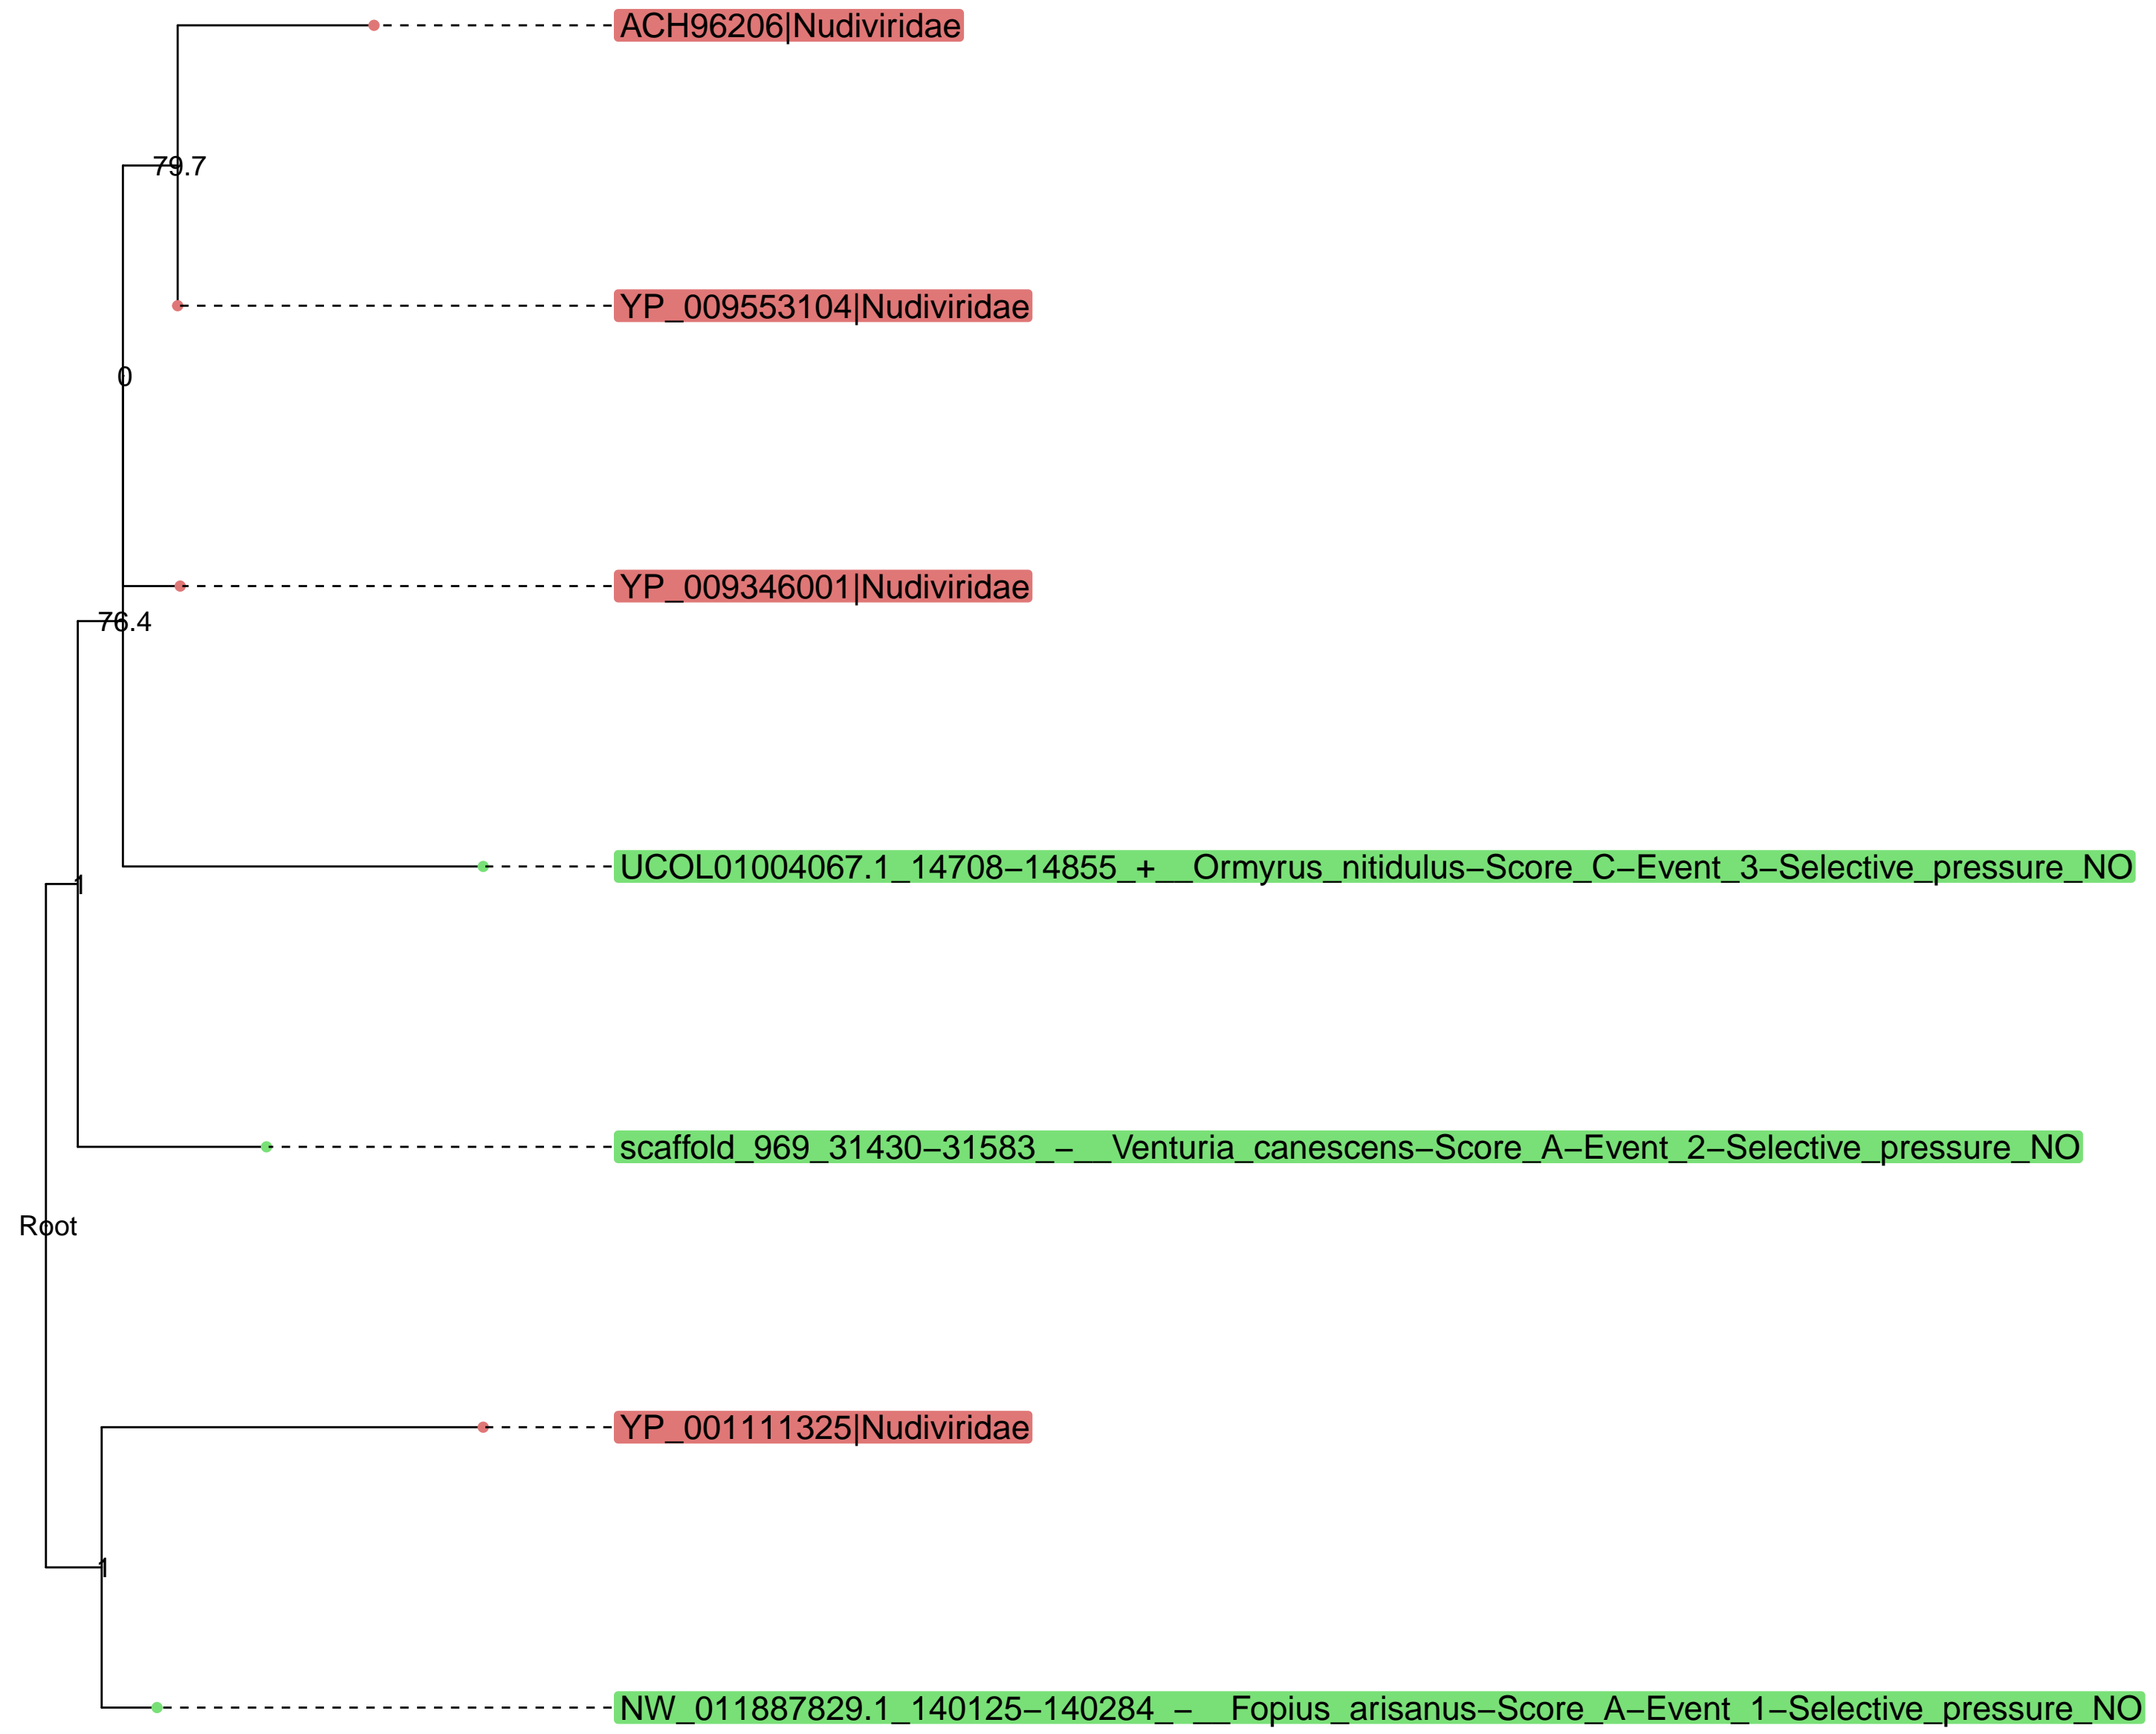

Cluster11455 – families involved : ['Nudiviridae'] – putative protein : ['GrBNV\_gp23-like protein']

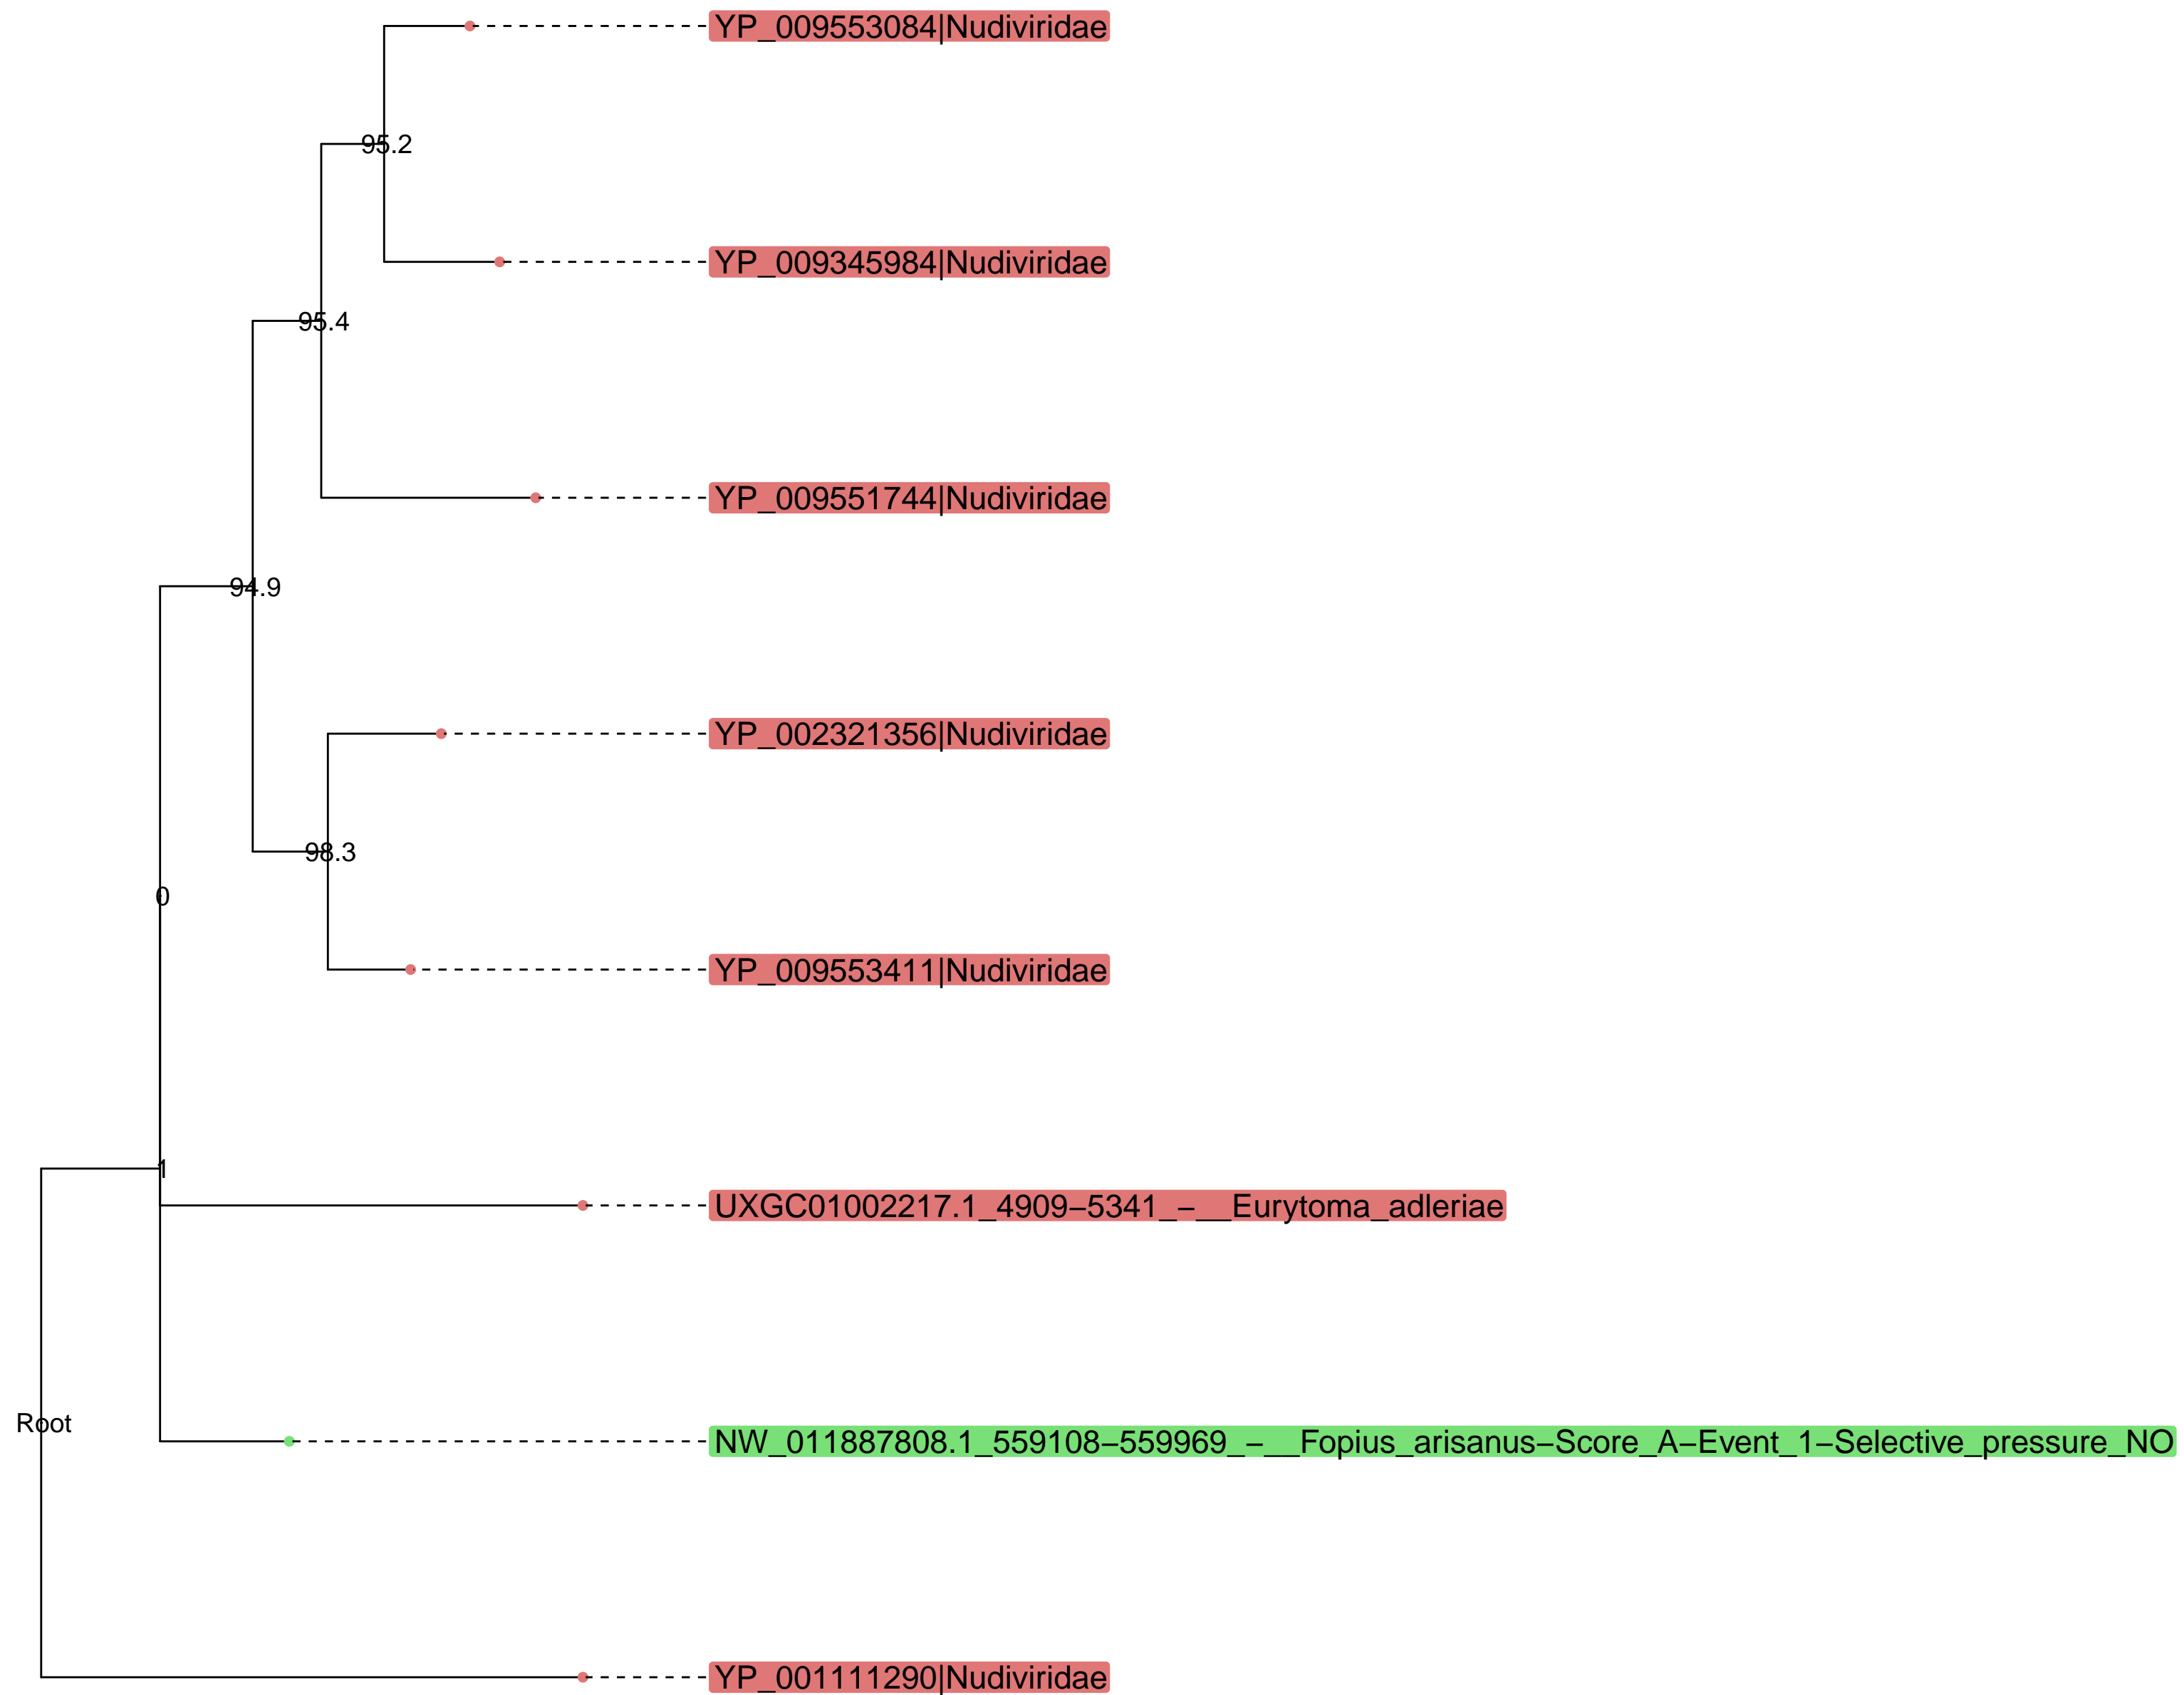

Cluster11238 – families involved : ['Nudiviridae'] – putative protein : ['GrBNV\_gp97-like protein']

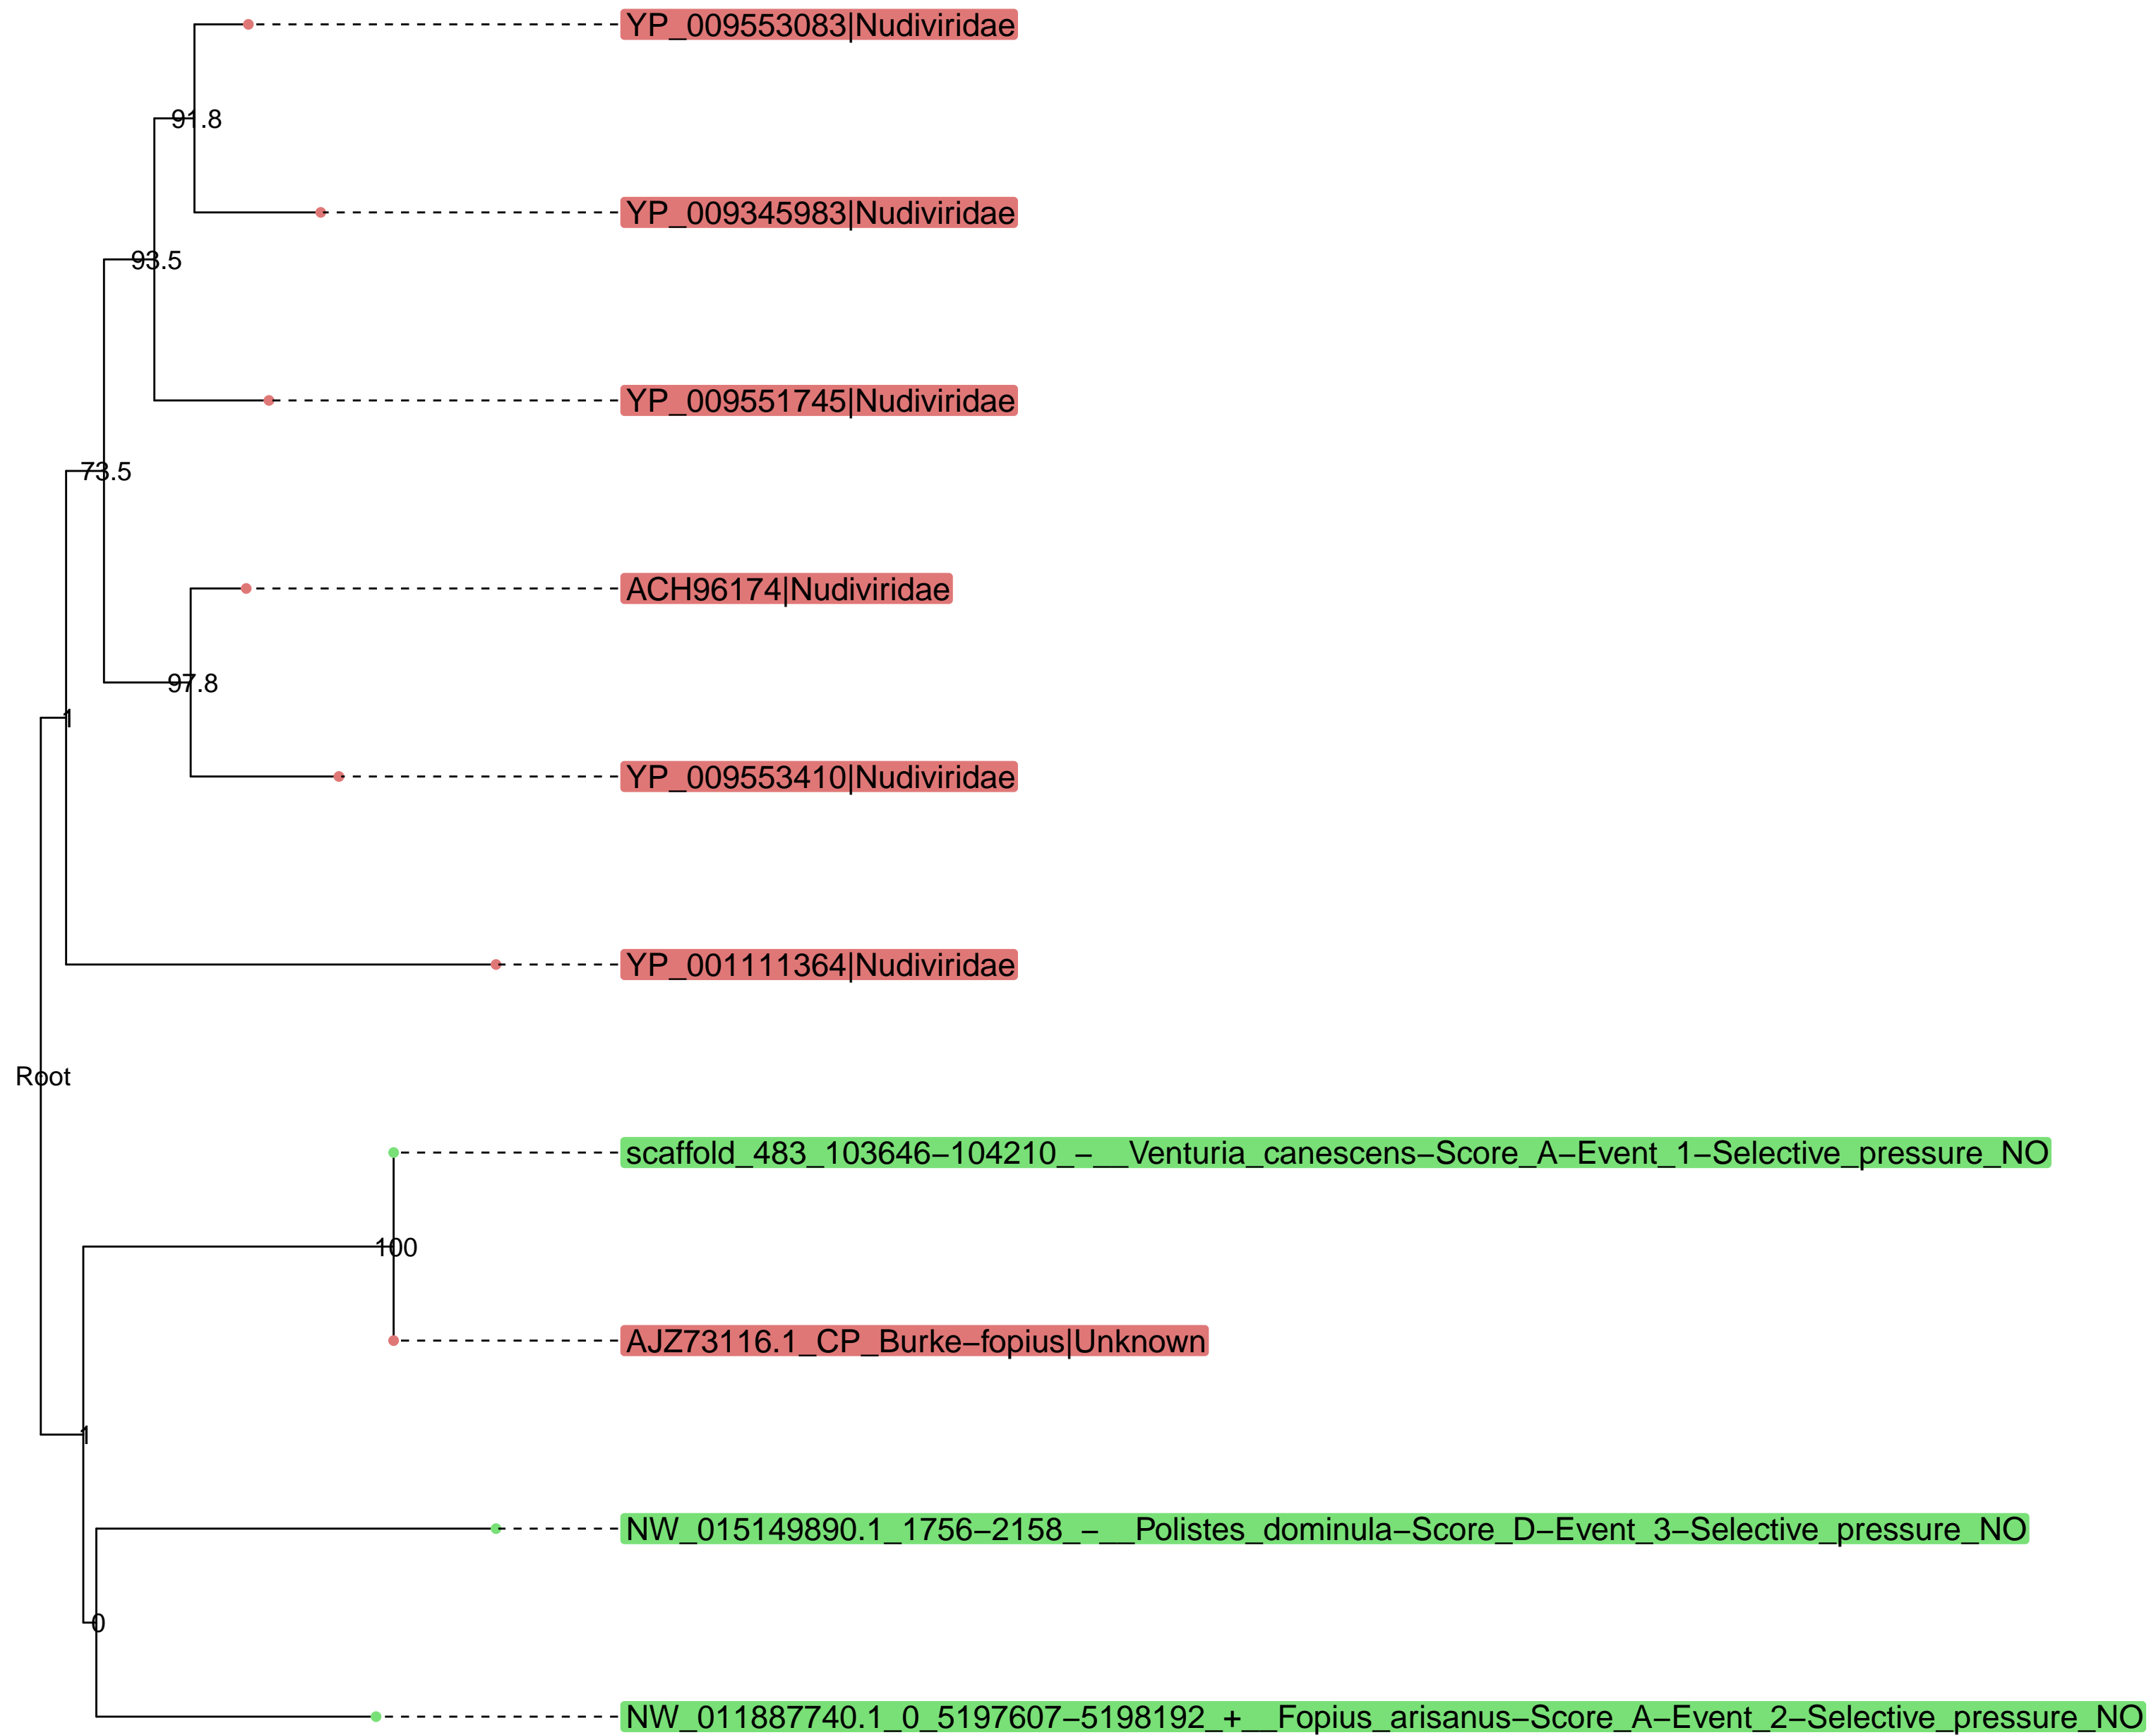

Cluster11092 – families involved : ['Nudiviridae'] – putative protein : ['GrBNV\_gp41-like protein']

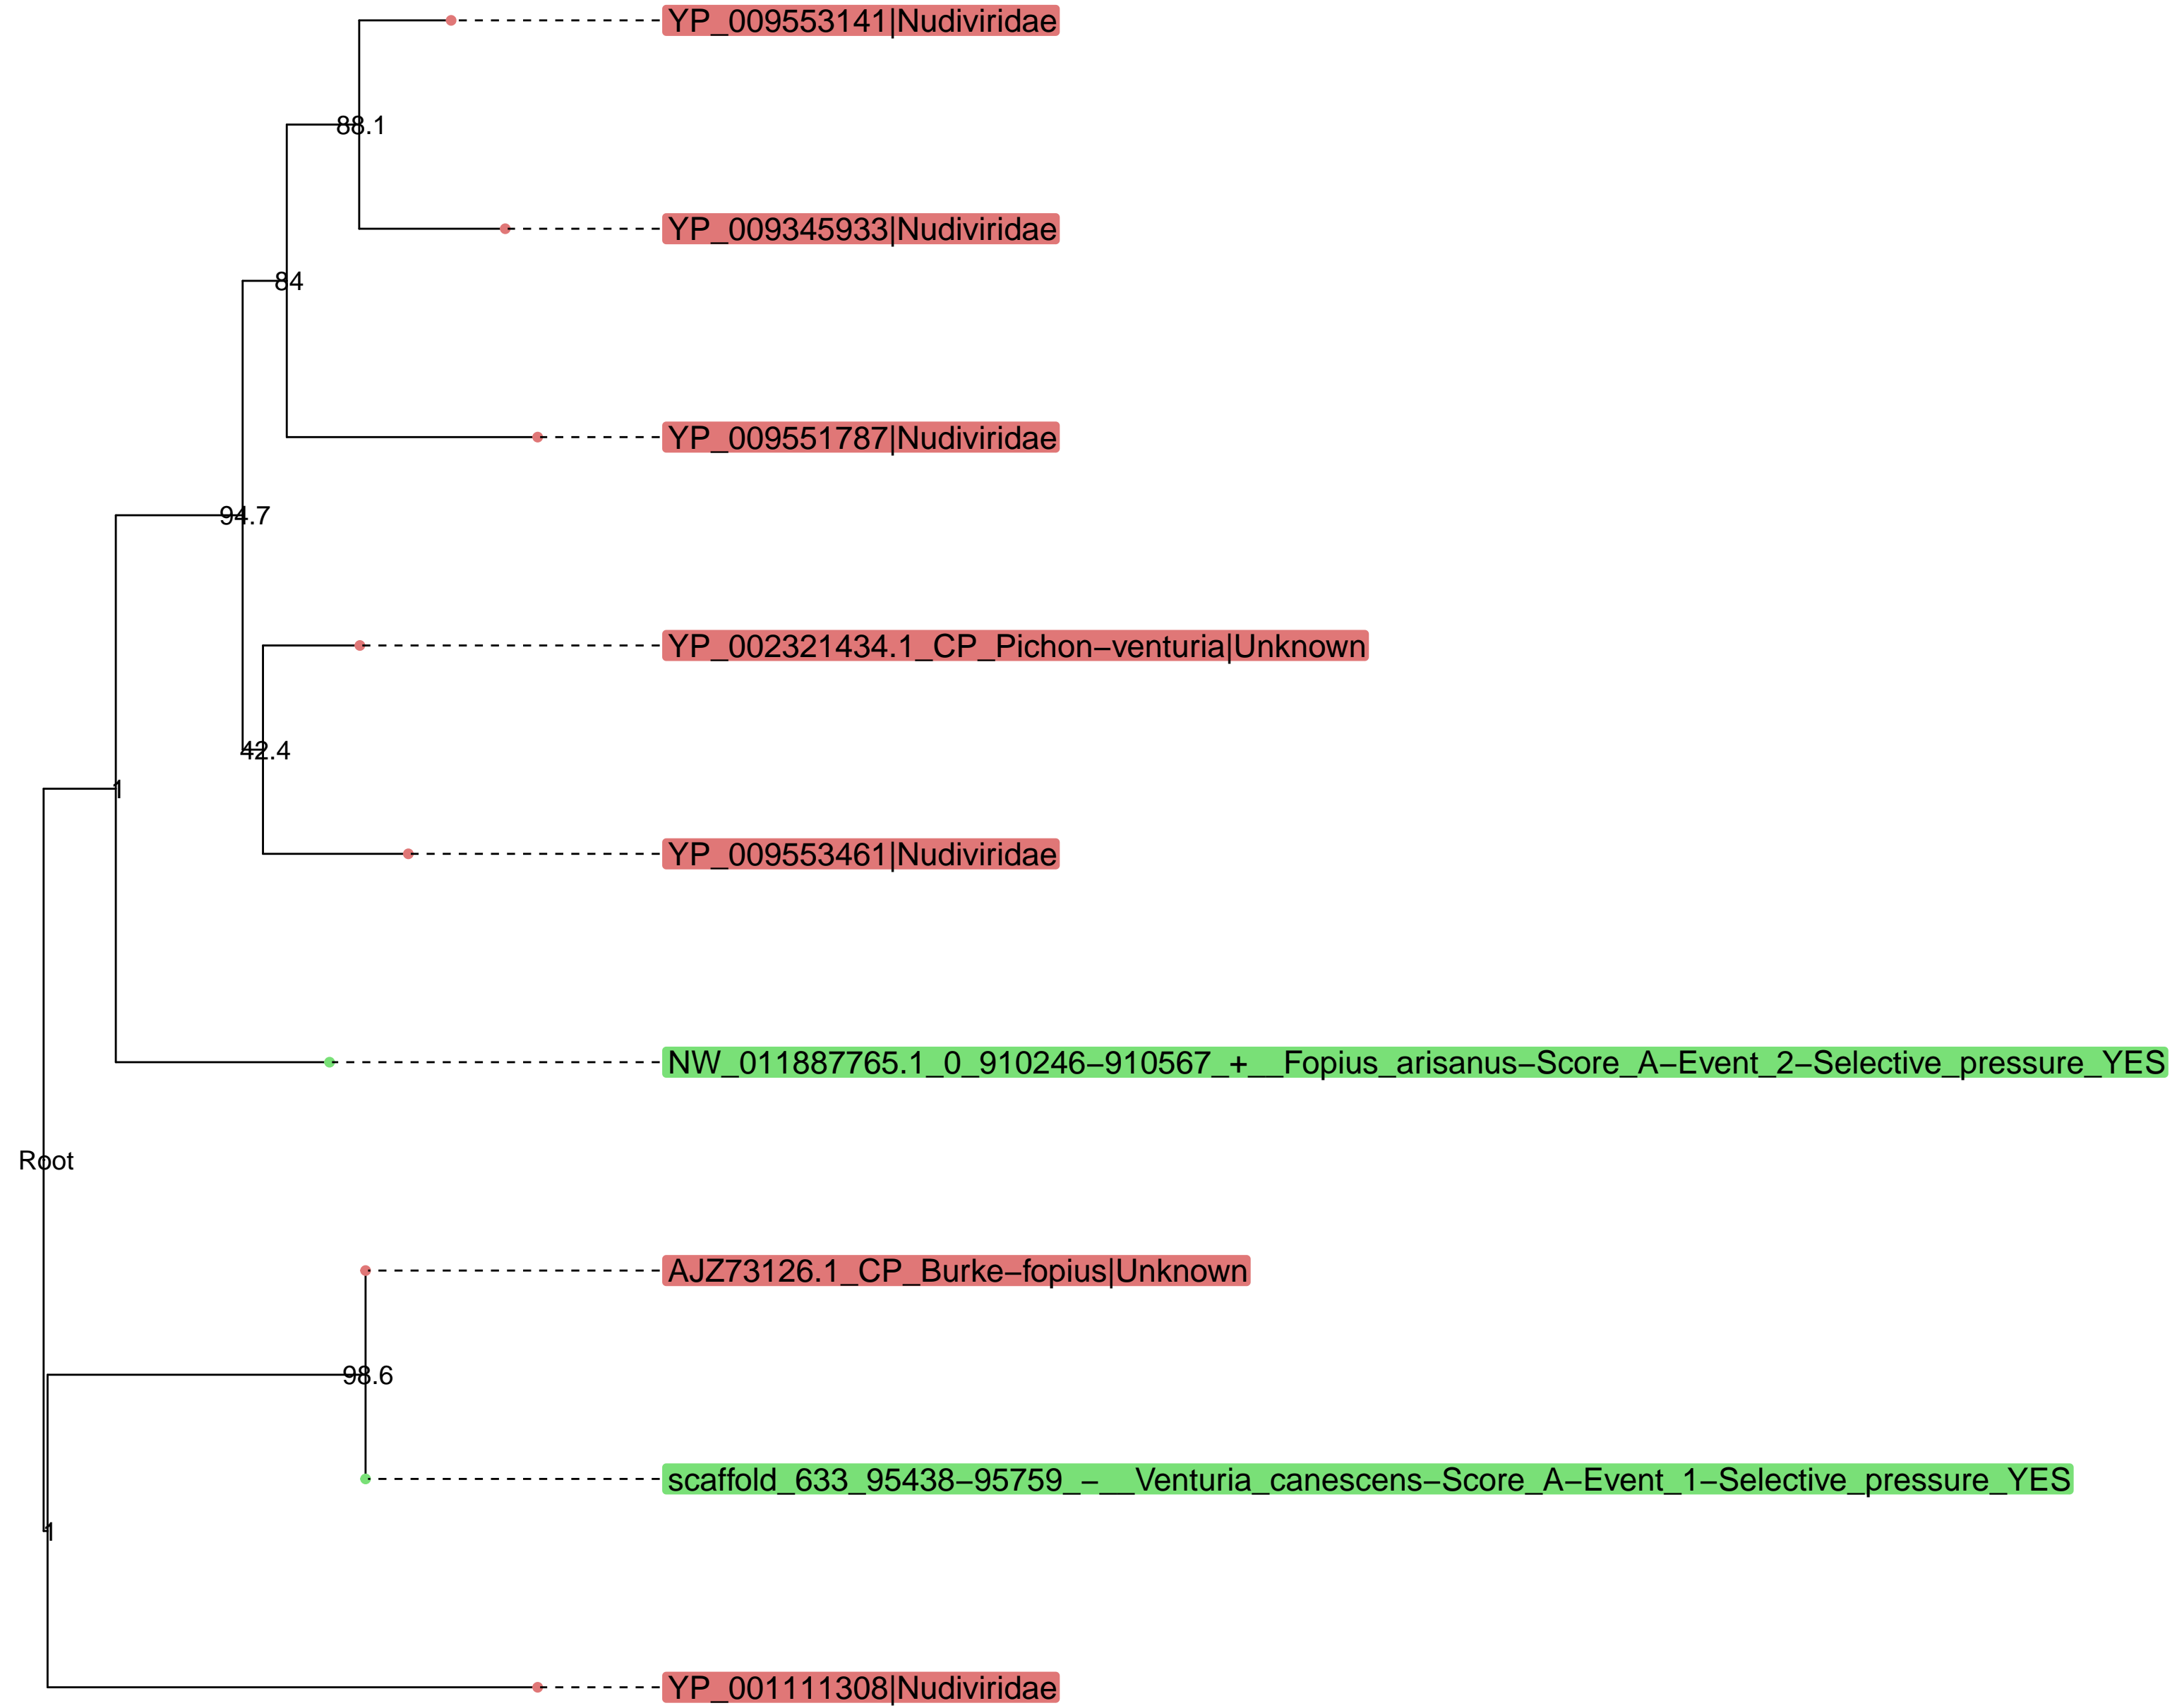

Cluster10833 – families involved : ['Nudiviridae'] – putative protein : ['DNA-directed RNA polymerase (EC 2.7.7.6)']

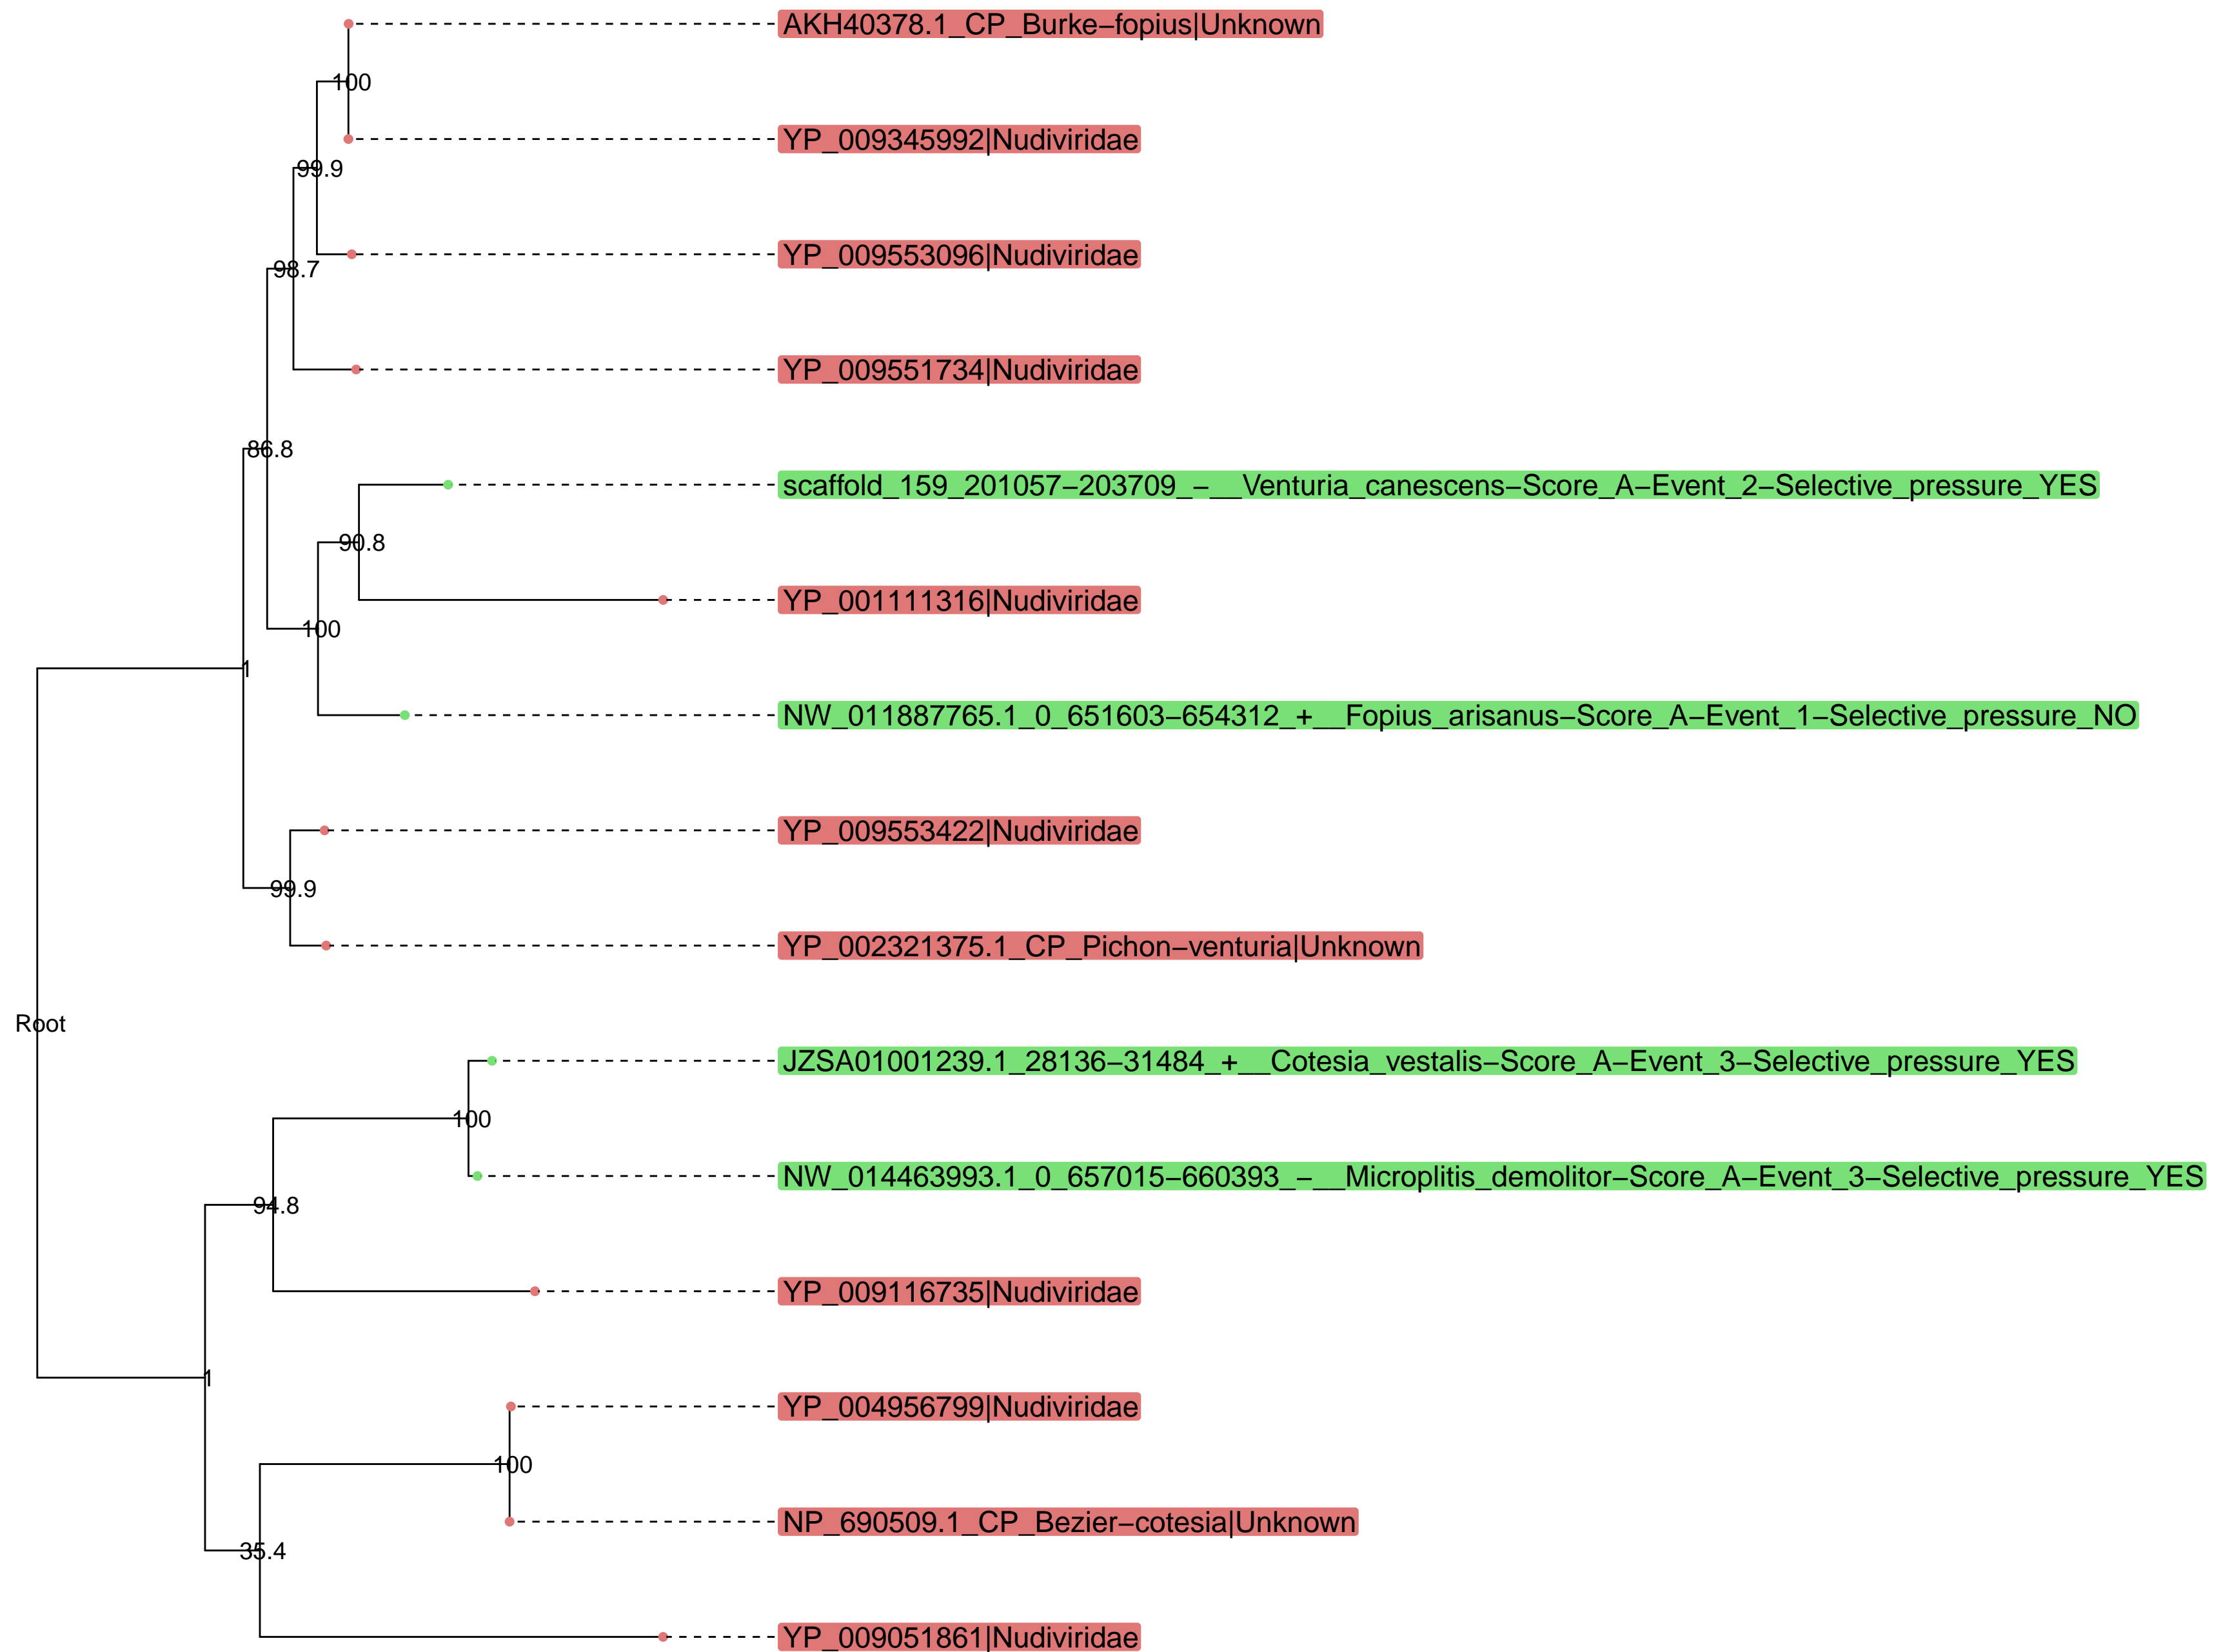

Cluster10771 – families involved : ['Nudiviridae'] – putative protein : ['GrBNV\_gp93-like protein']

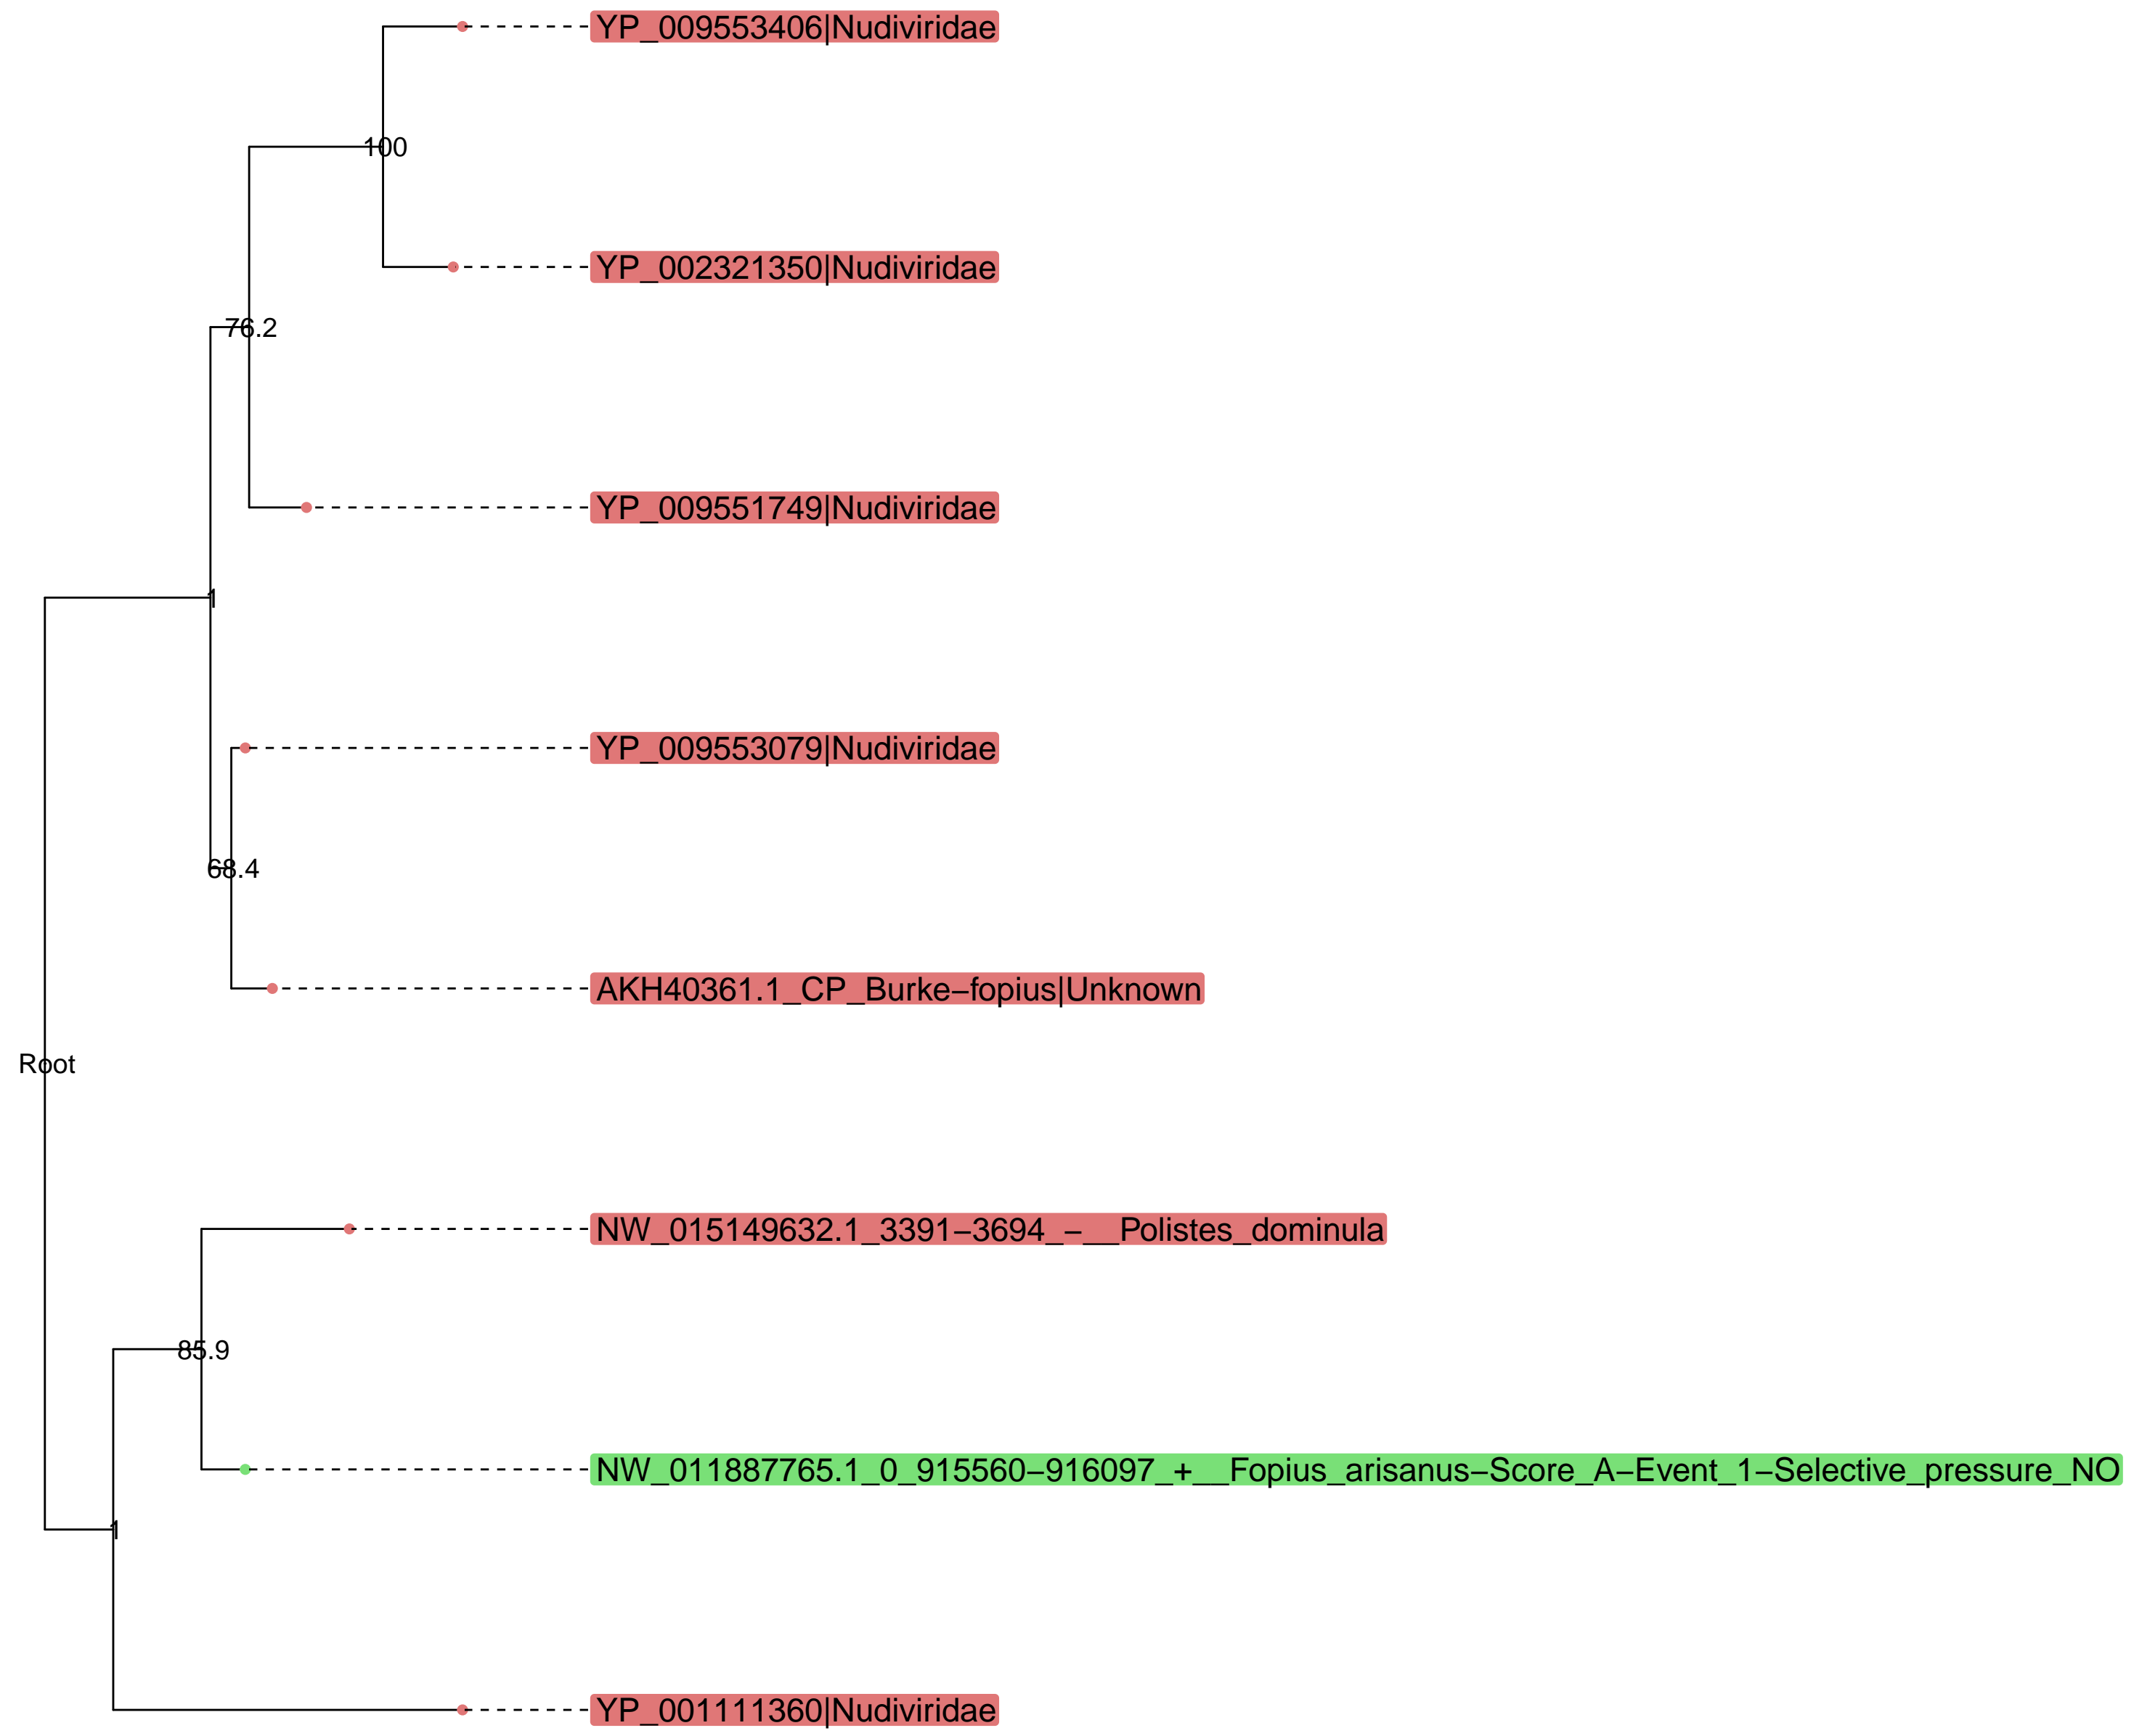

Cluster8973 – families involved : ['LbFV\_like'] – putative protein : ['mRNA capping enzyme, catalytic domain']

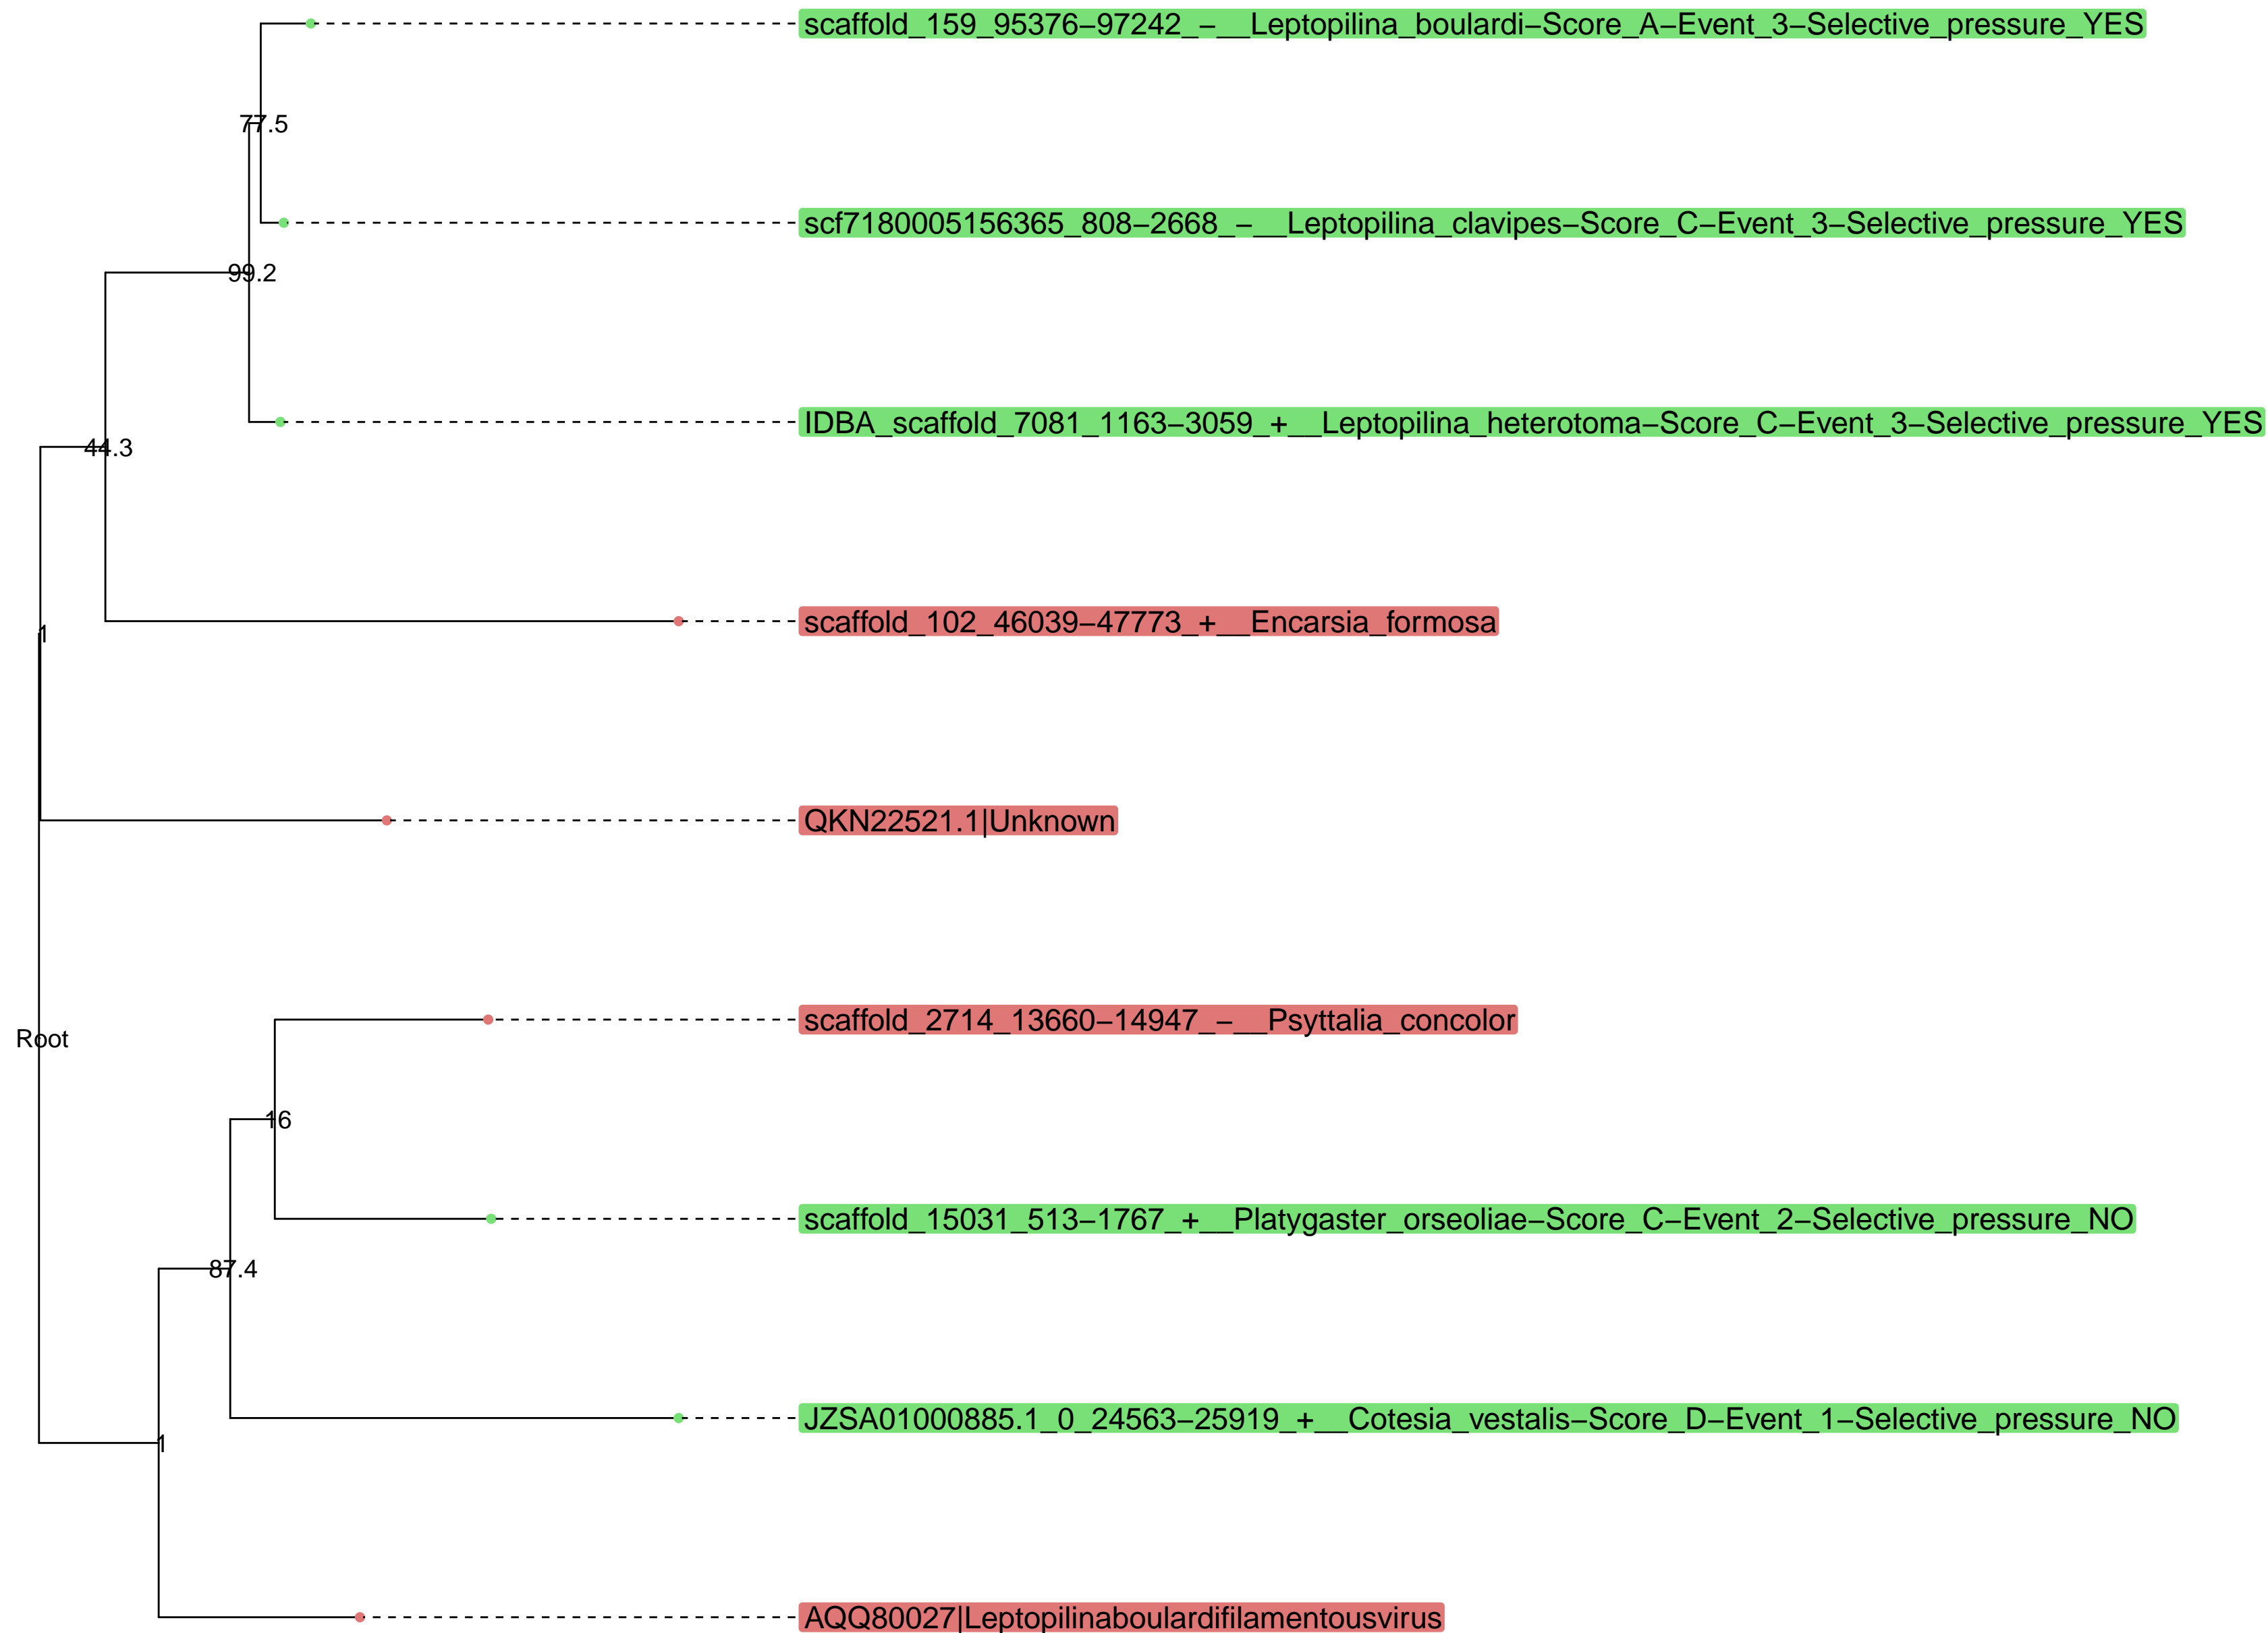



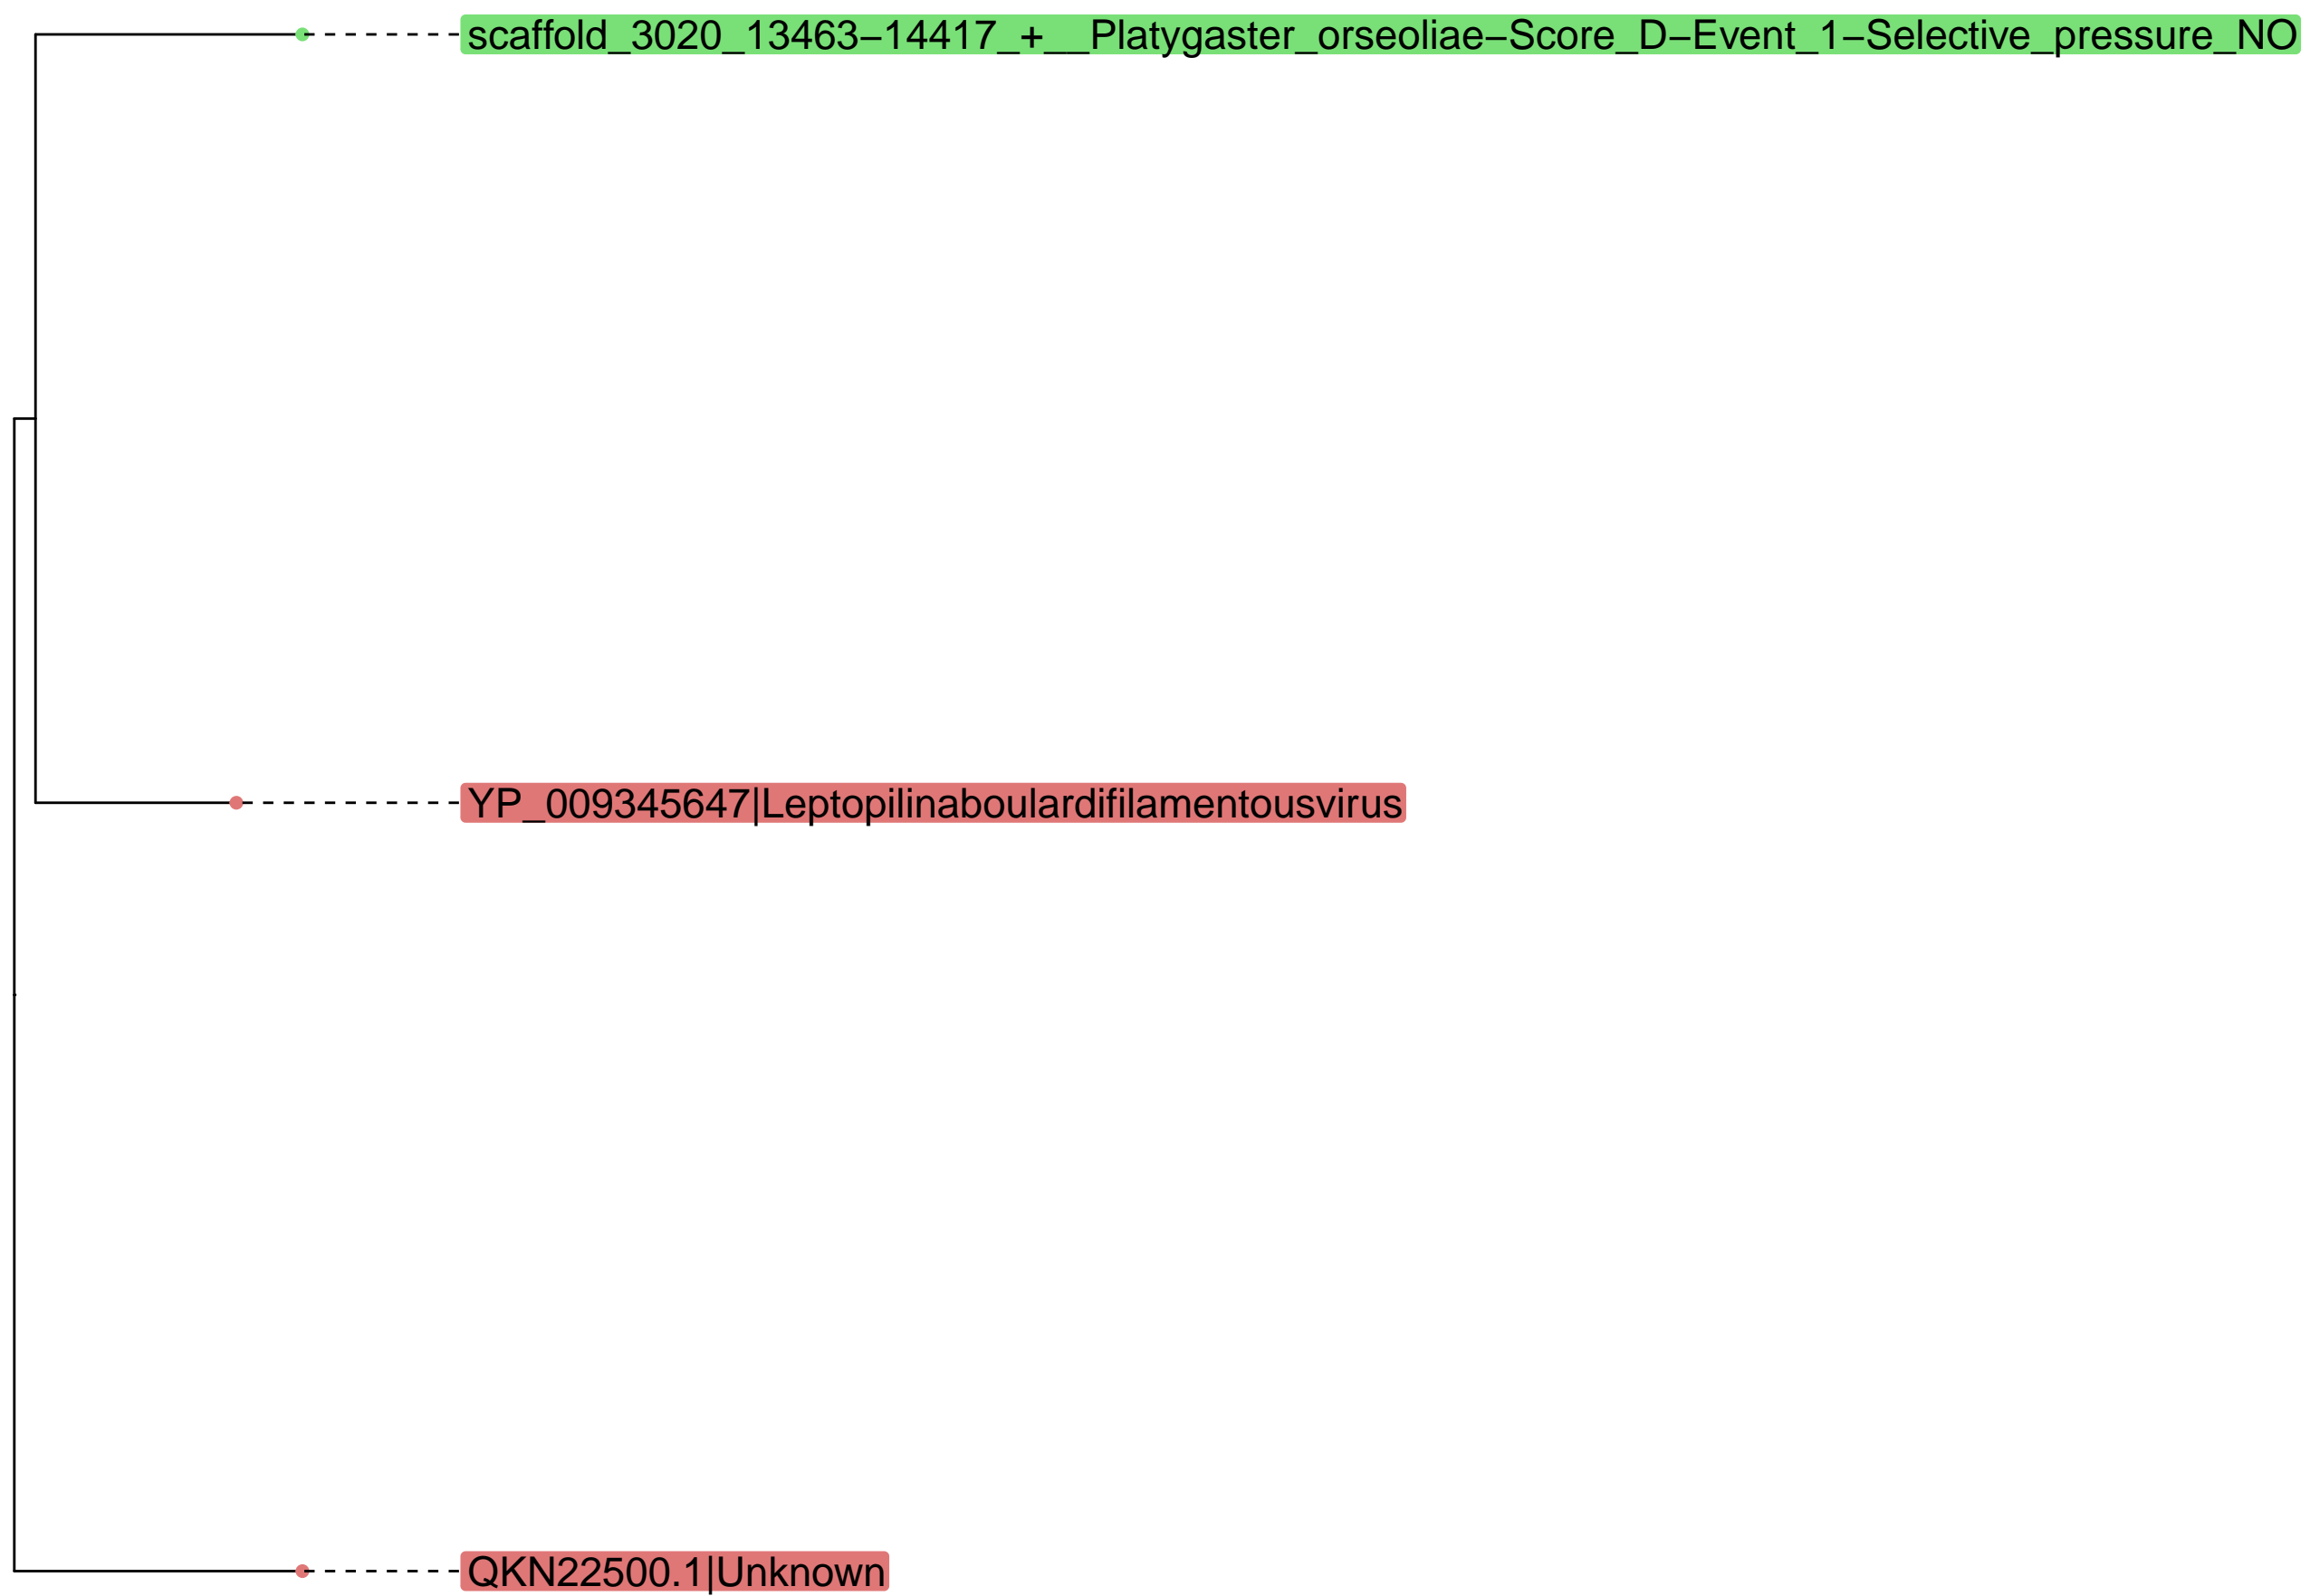

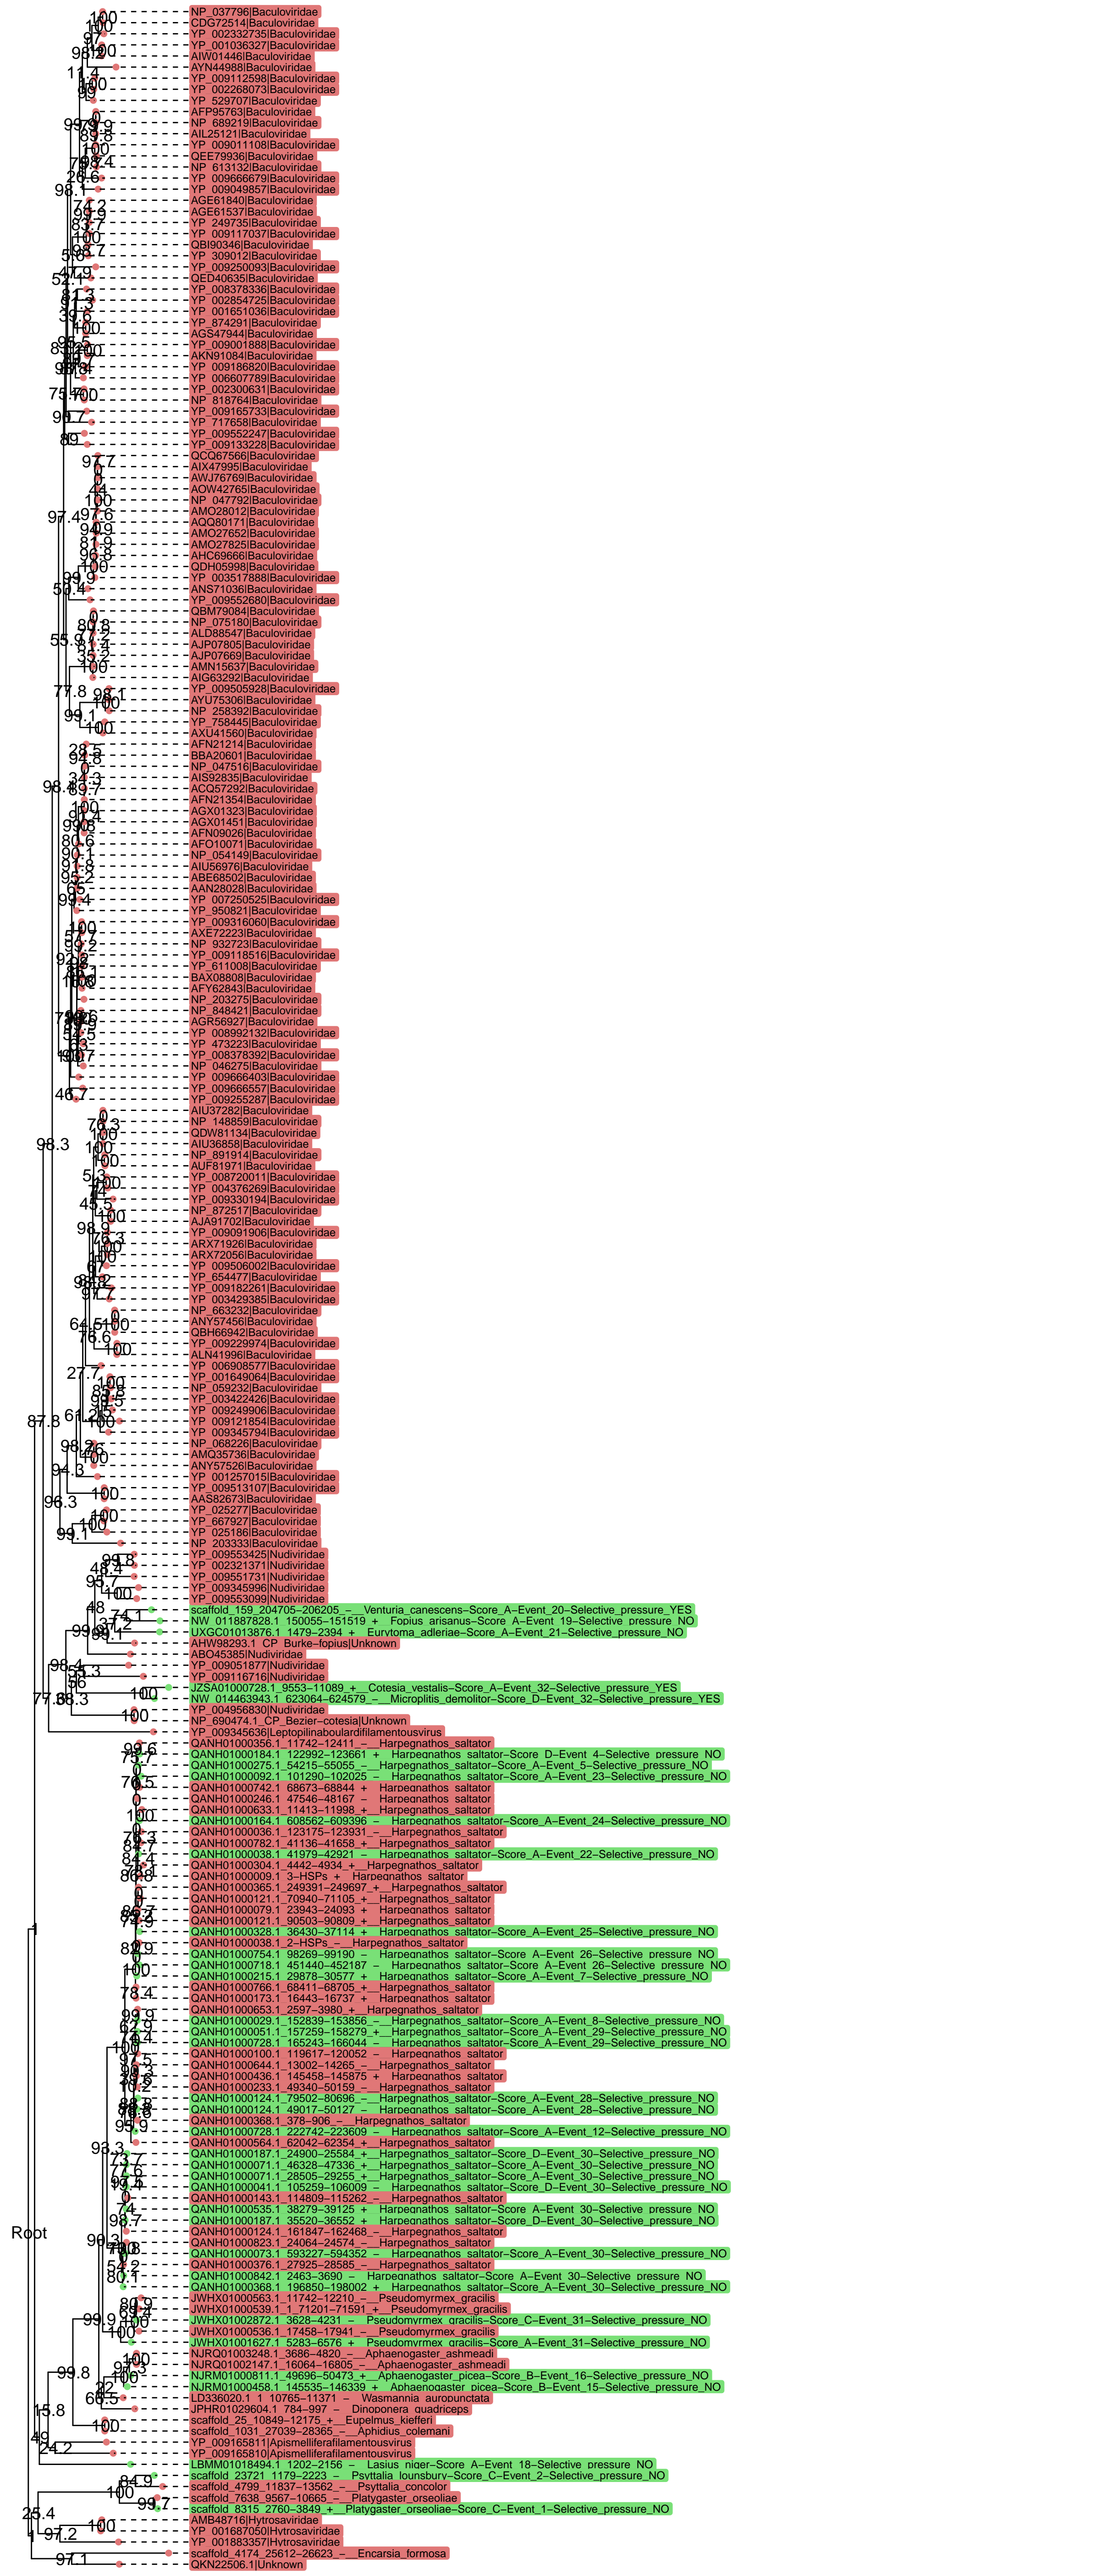

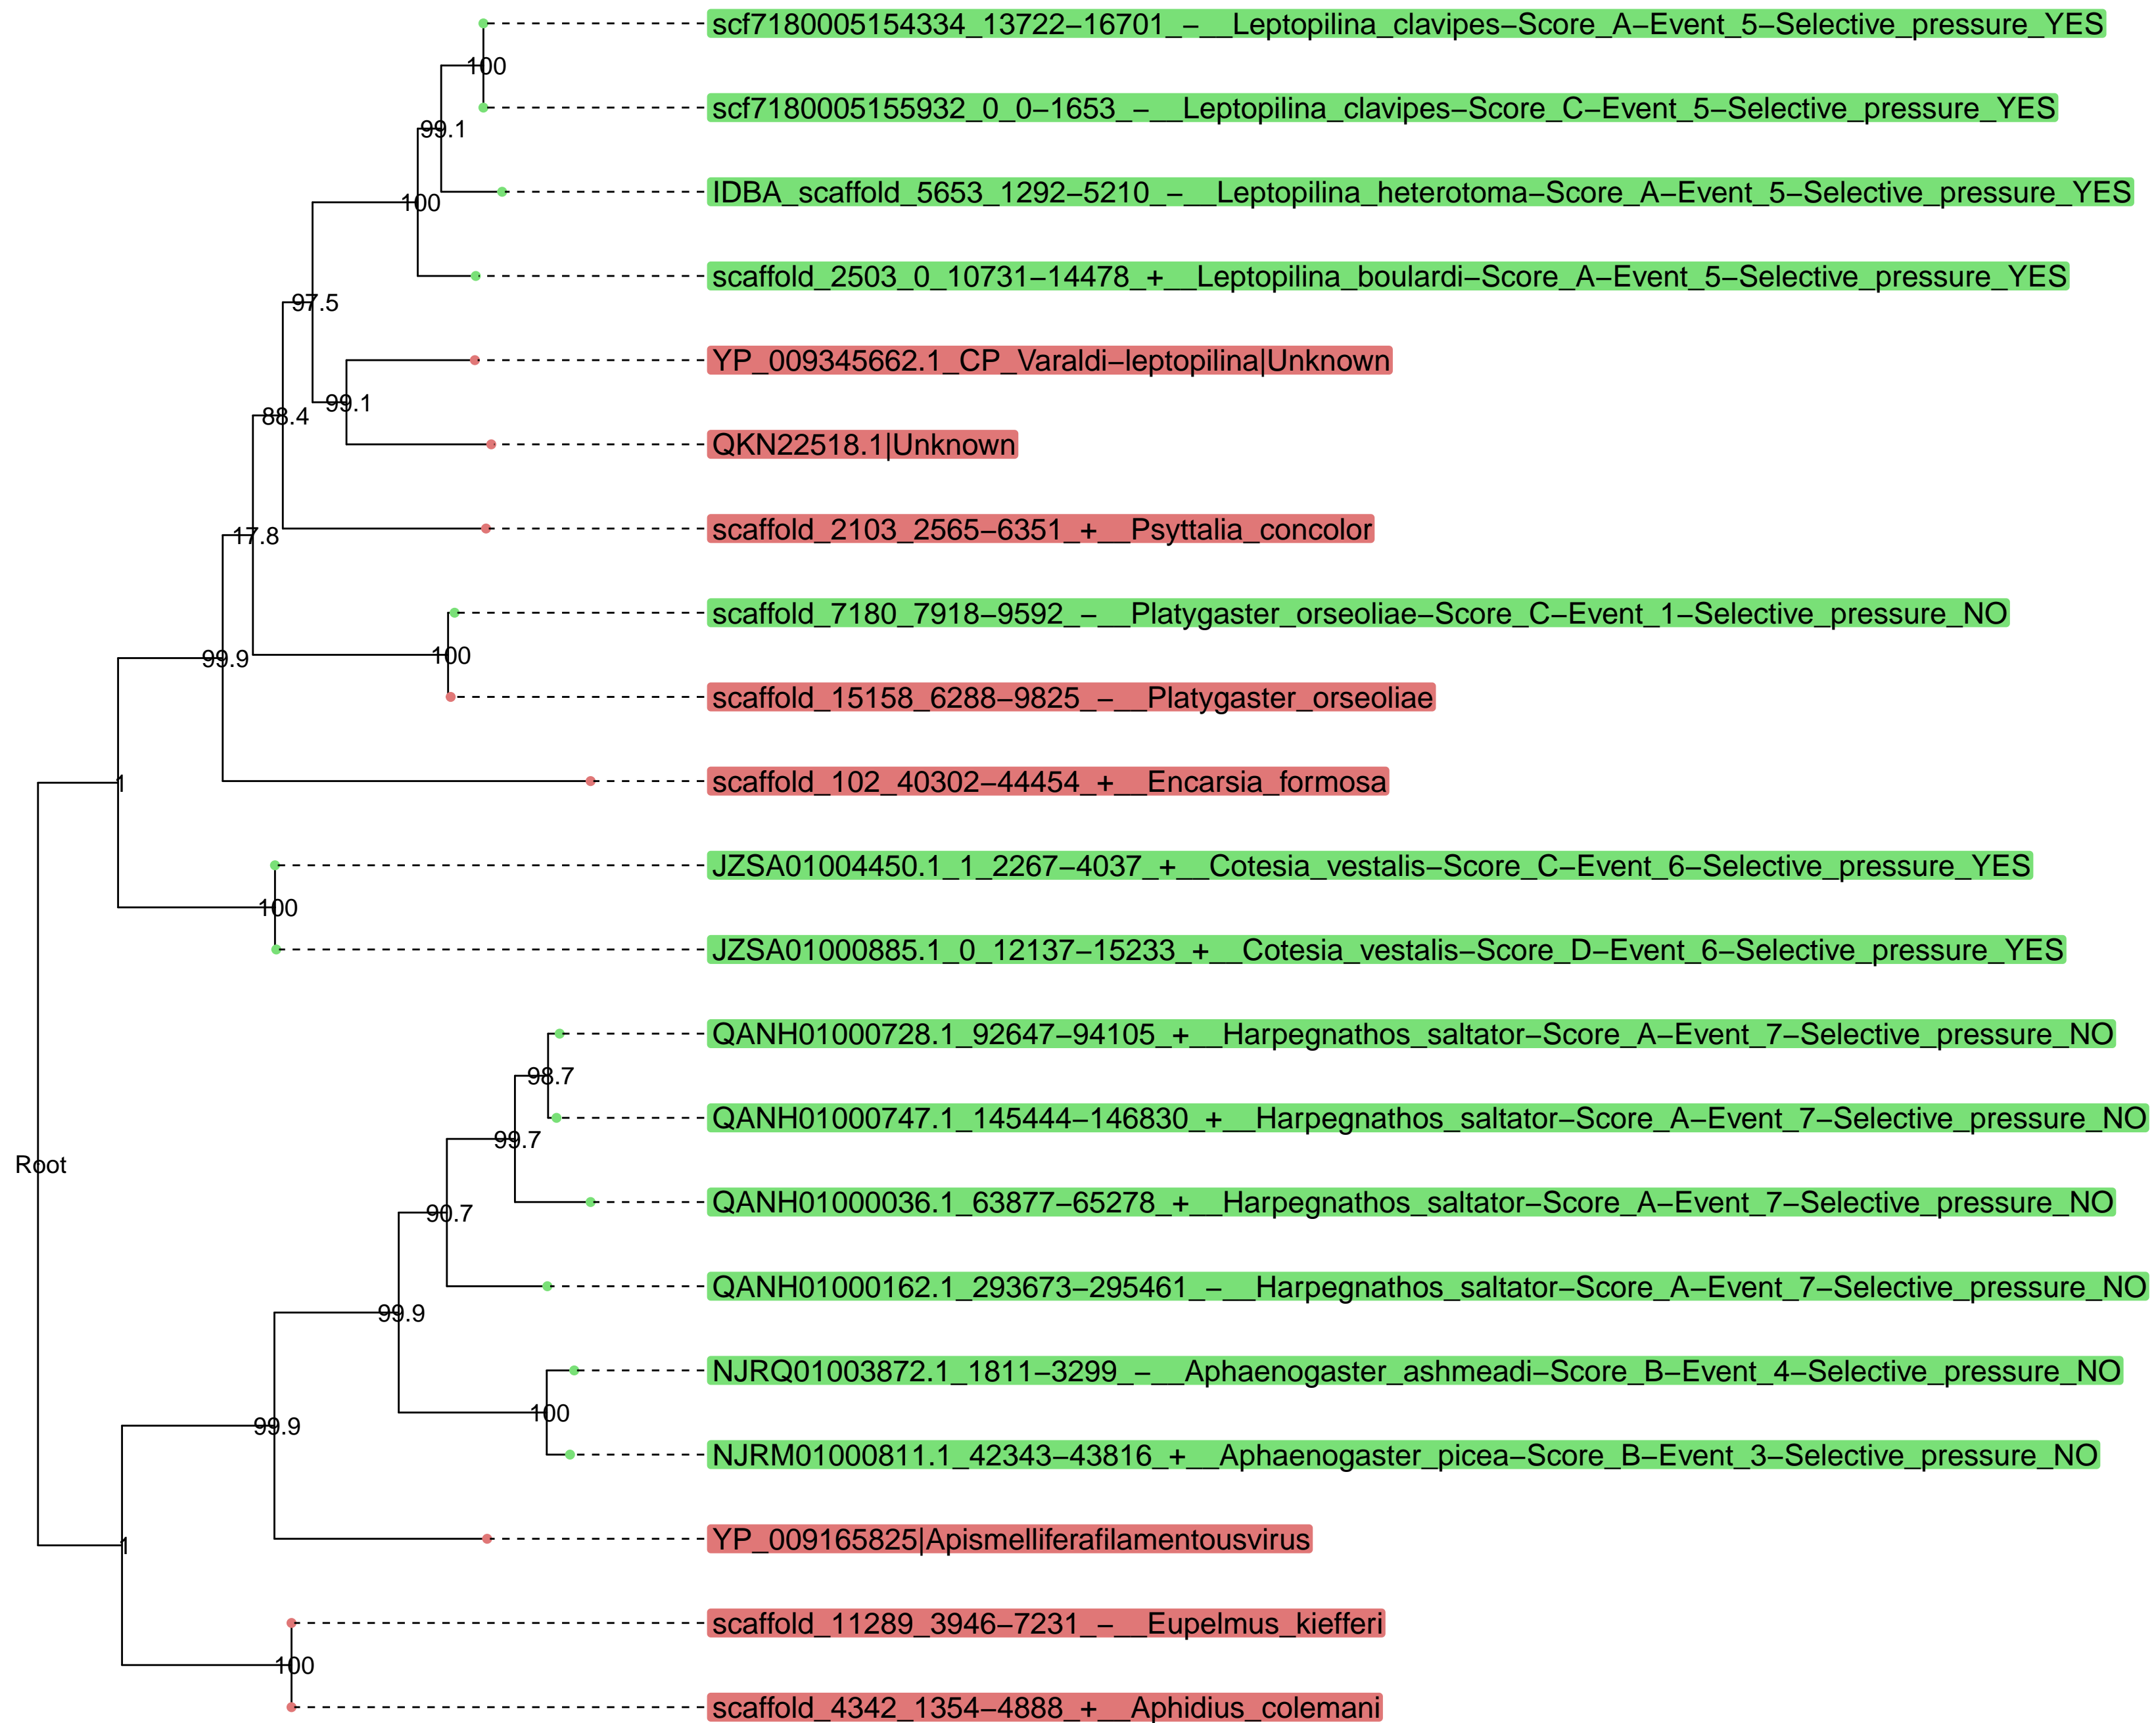

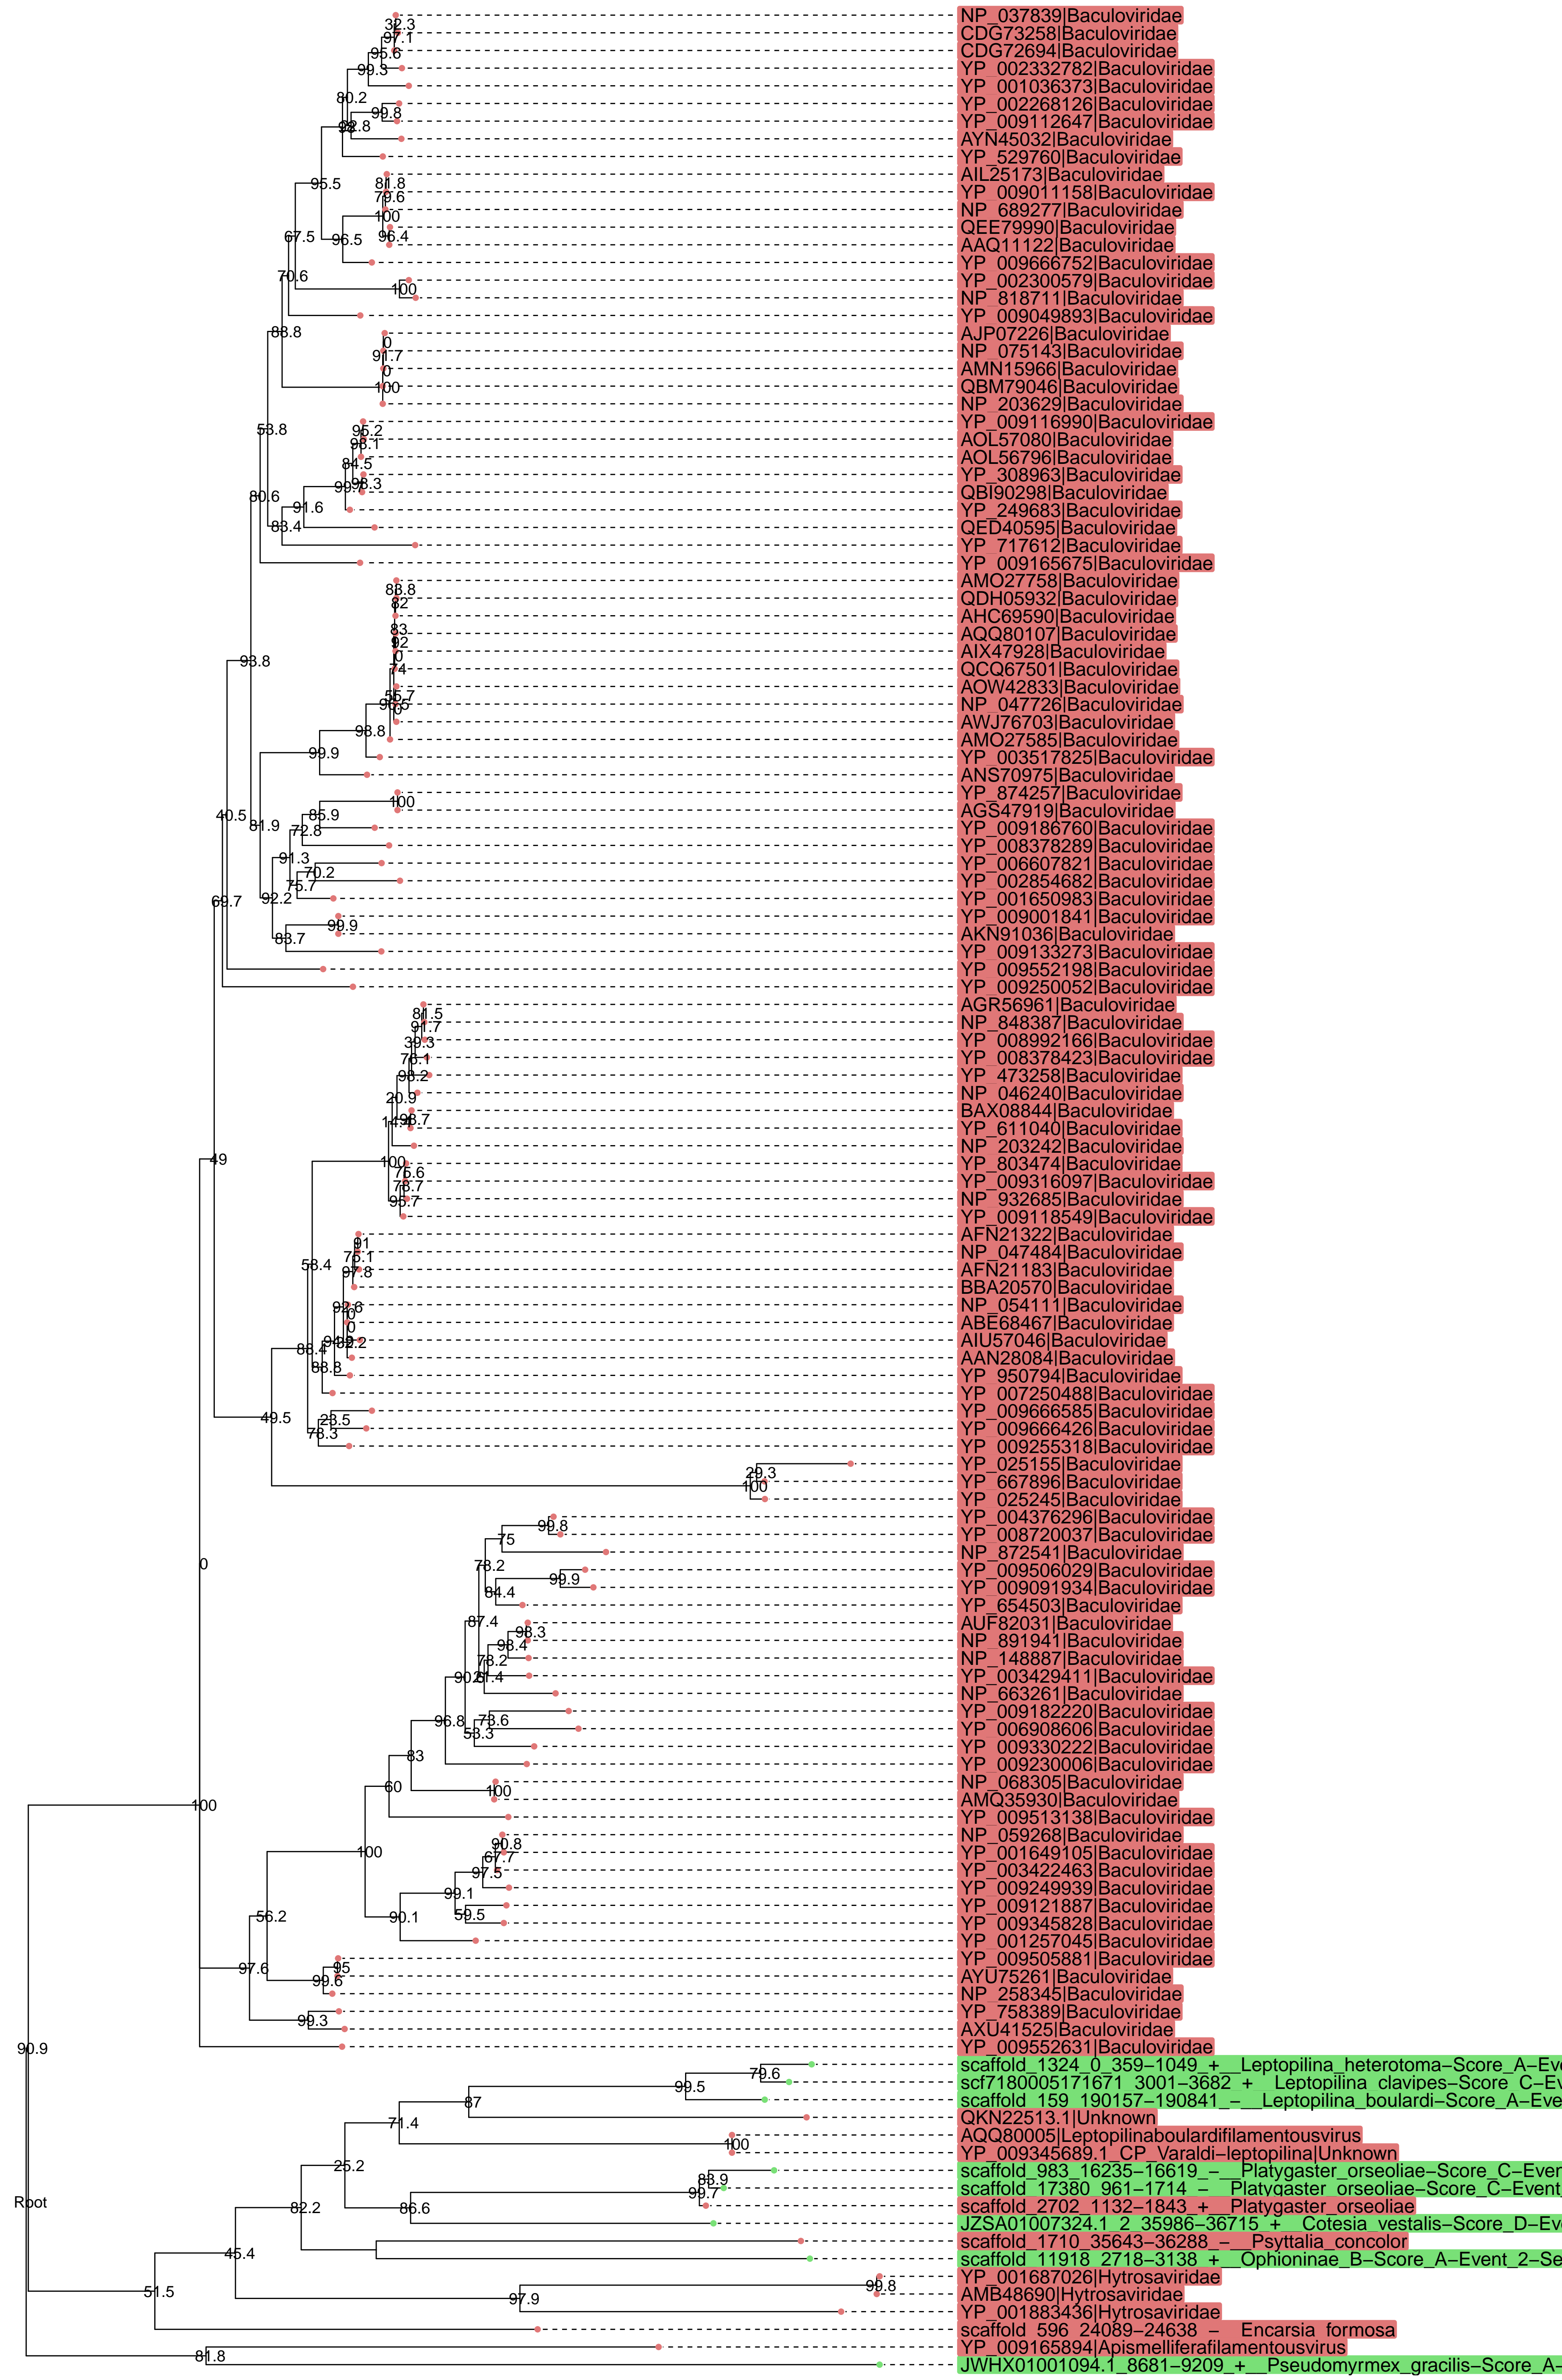

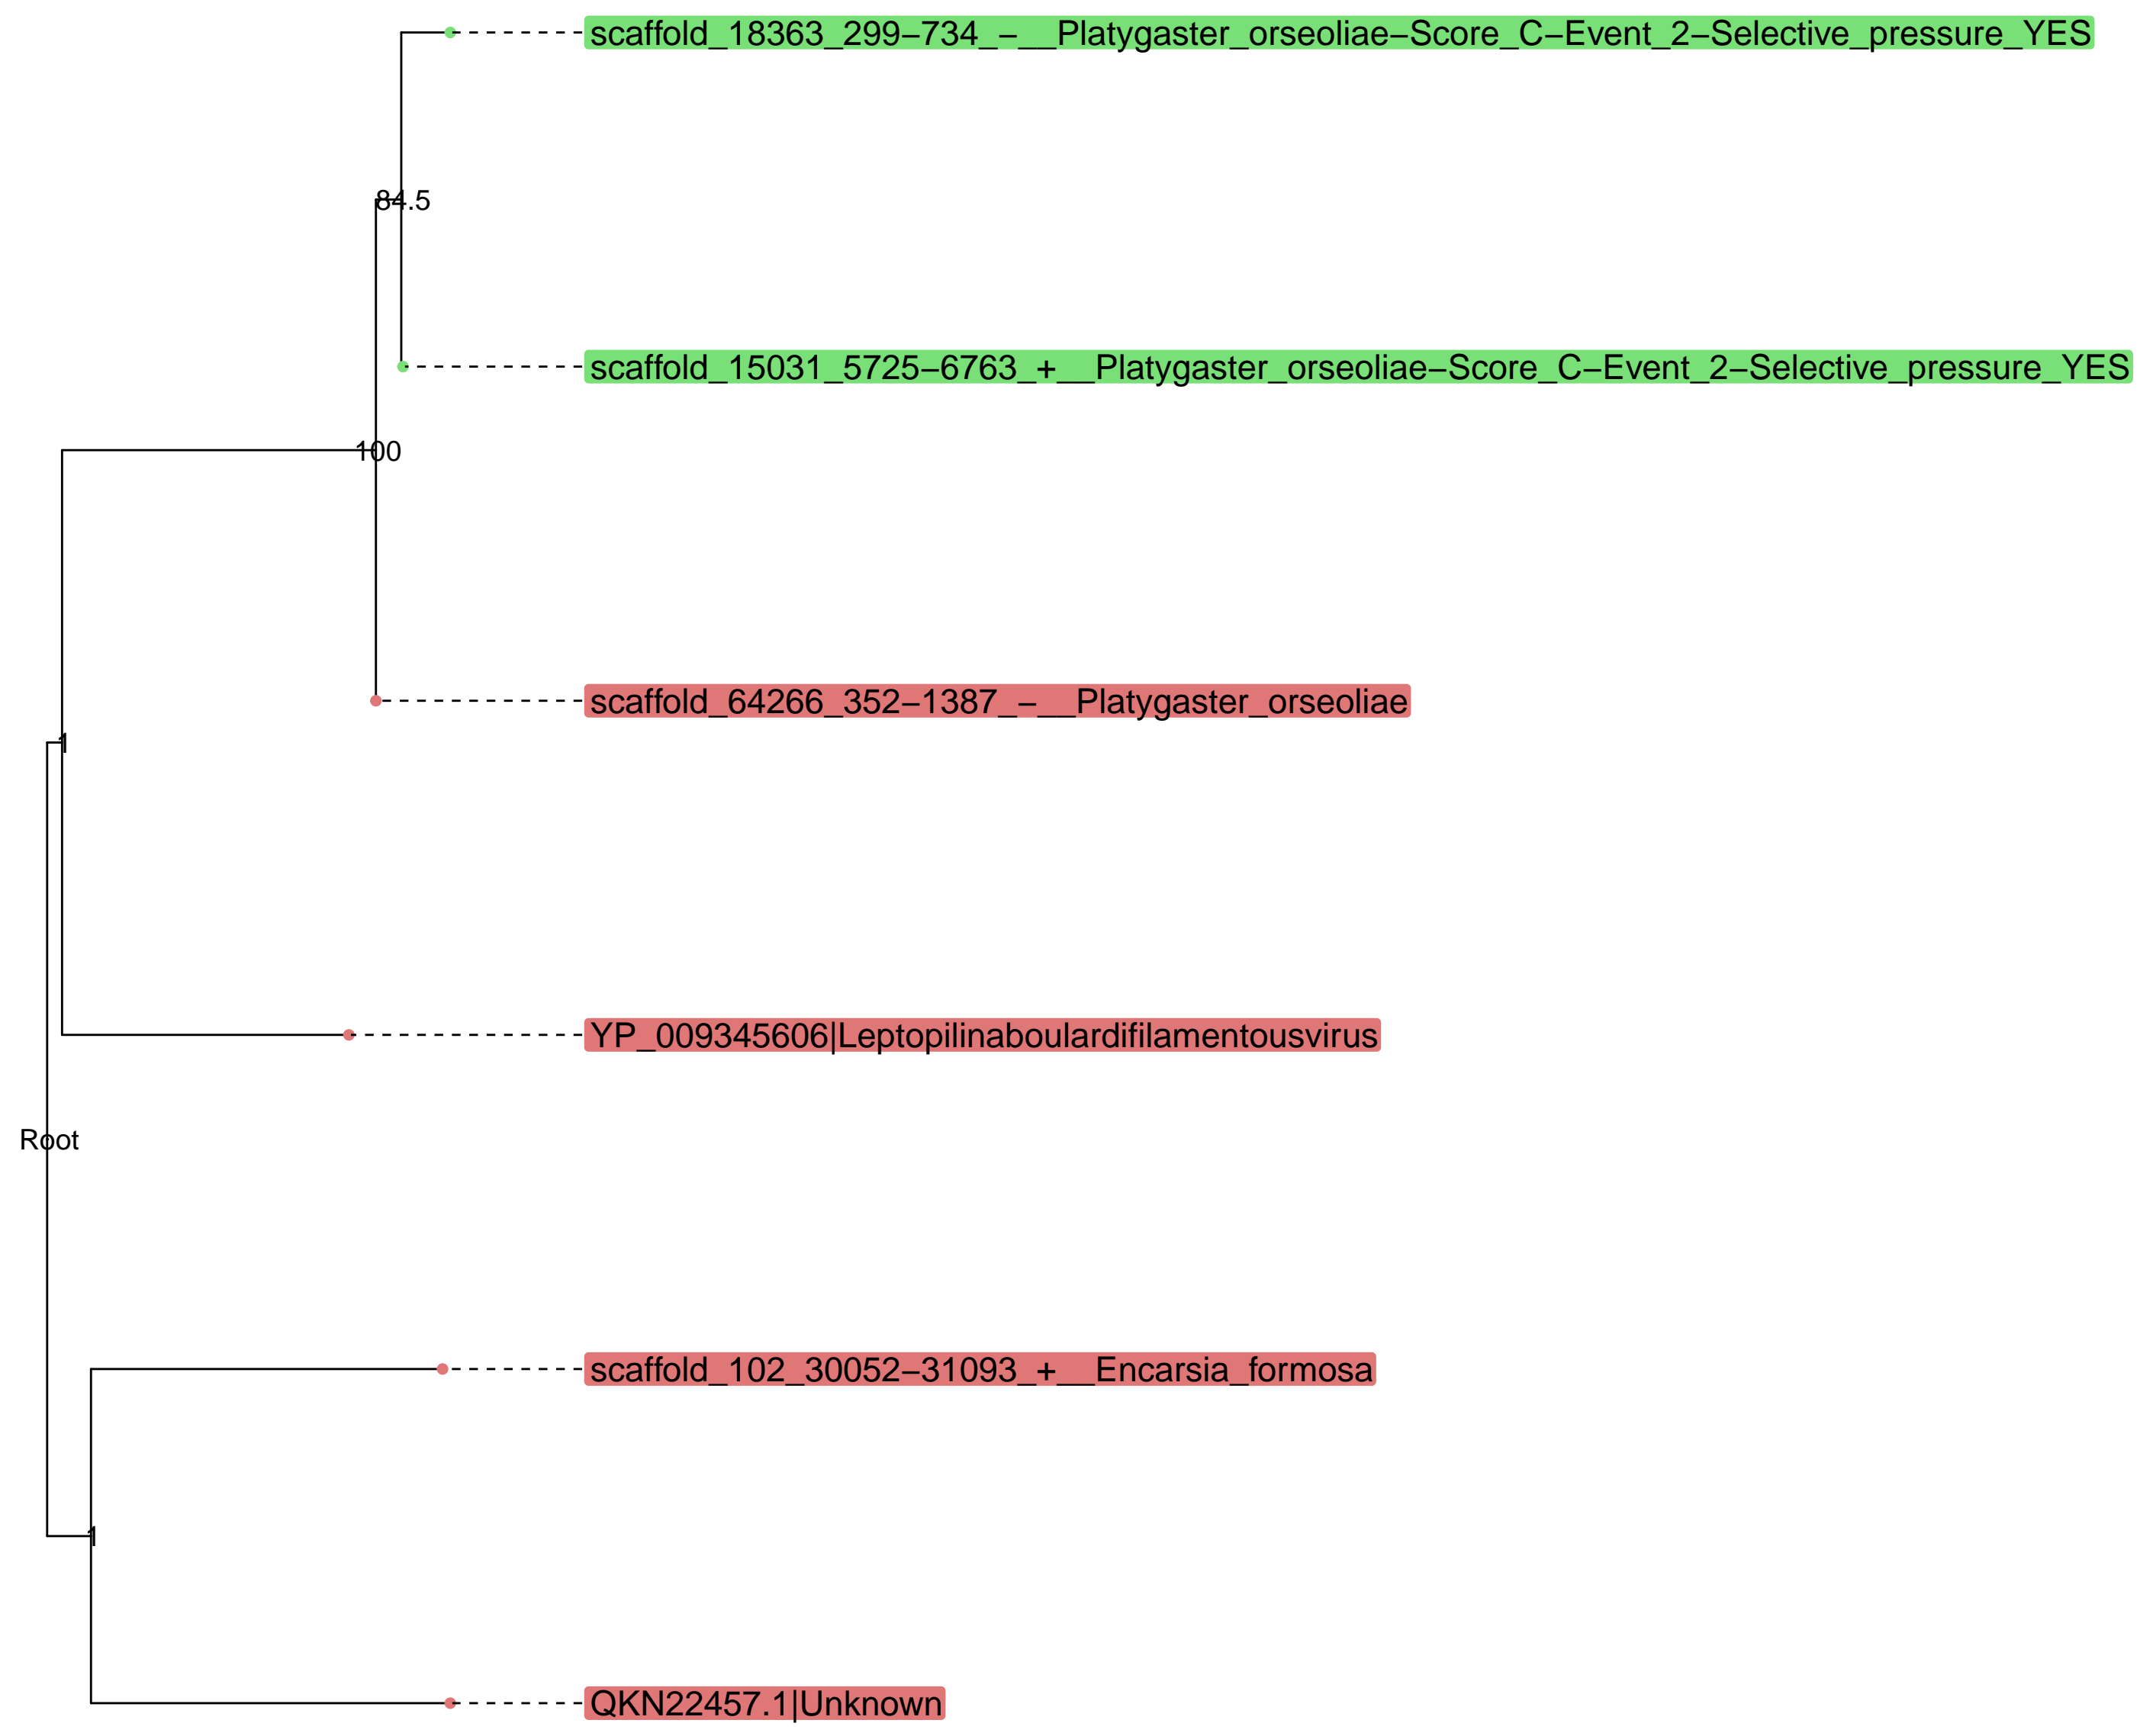

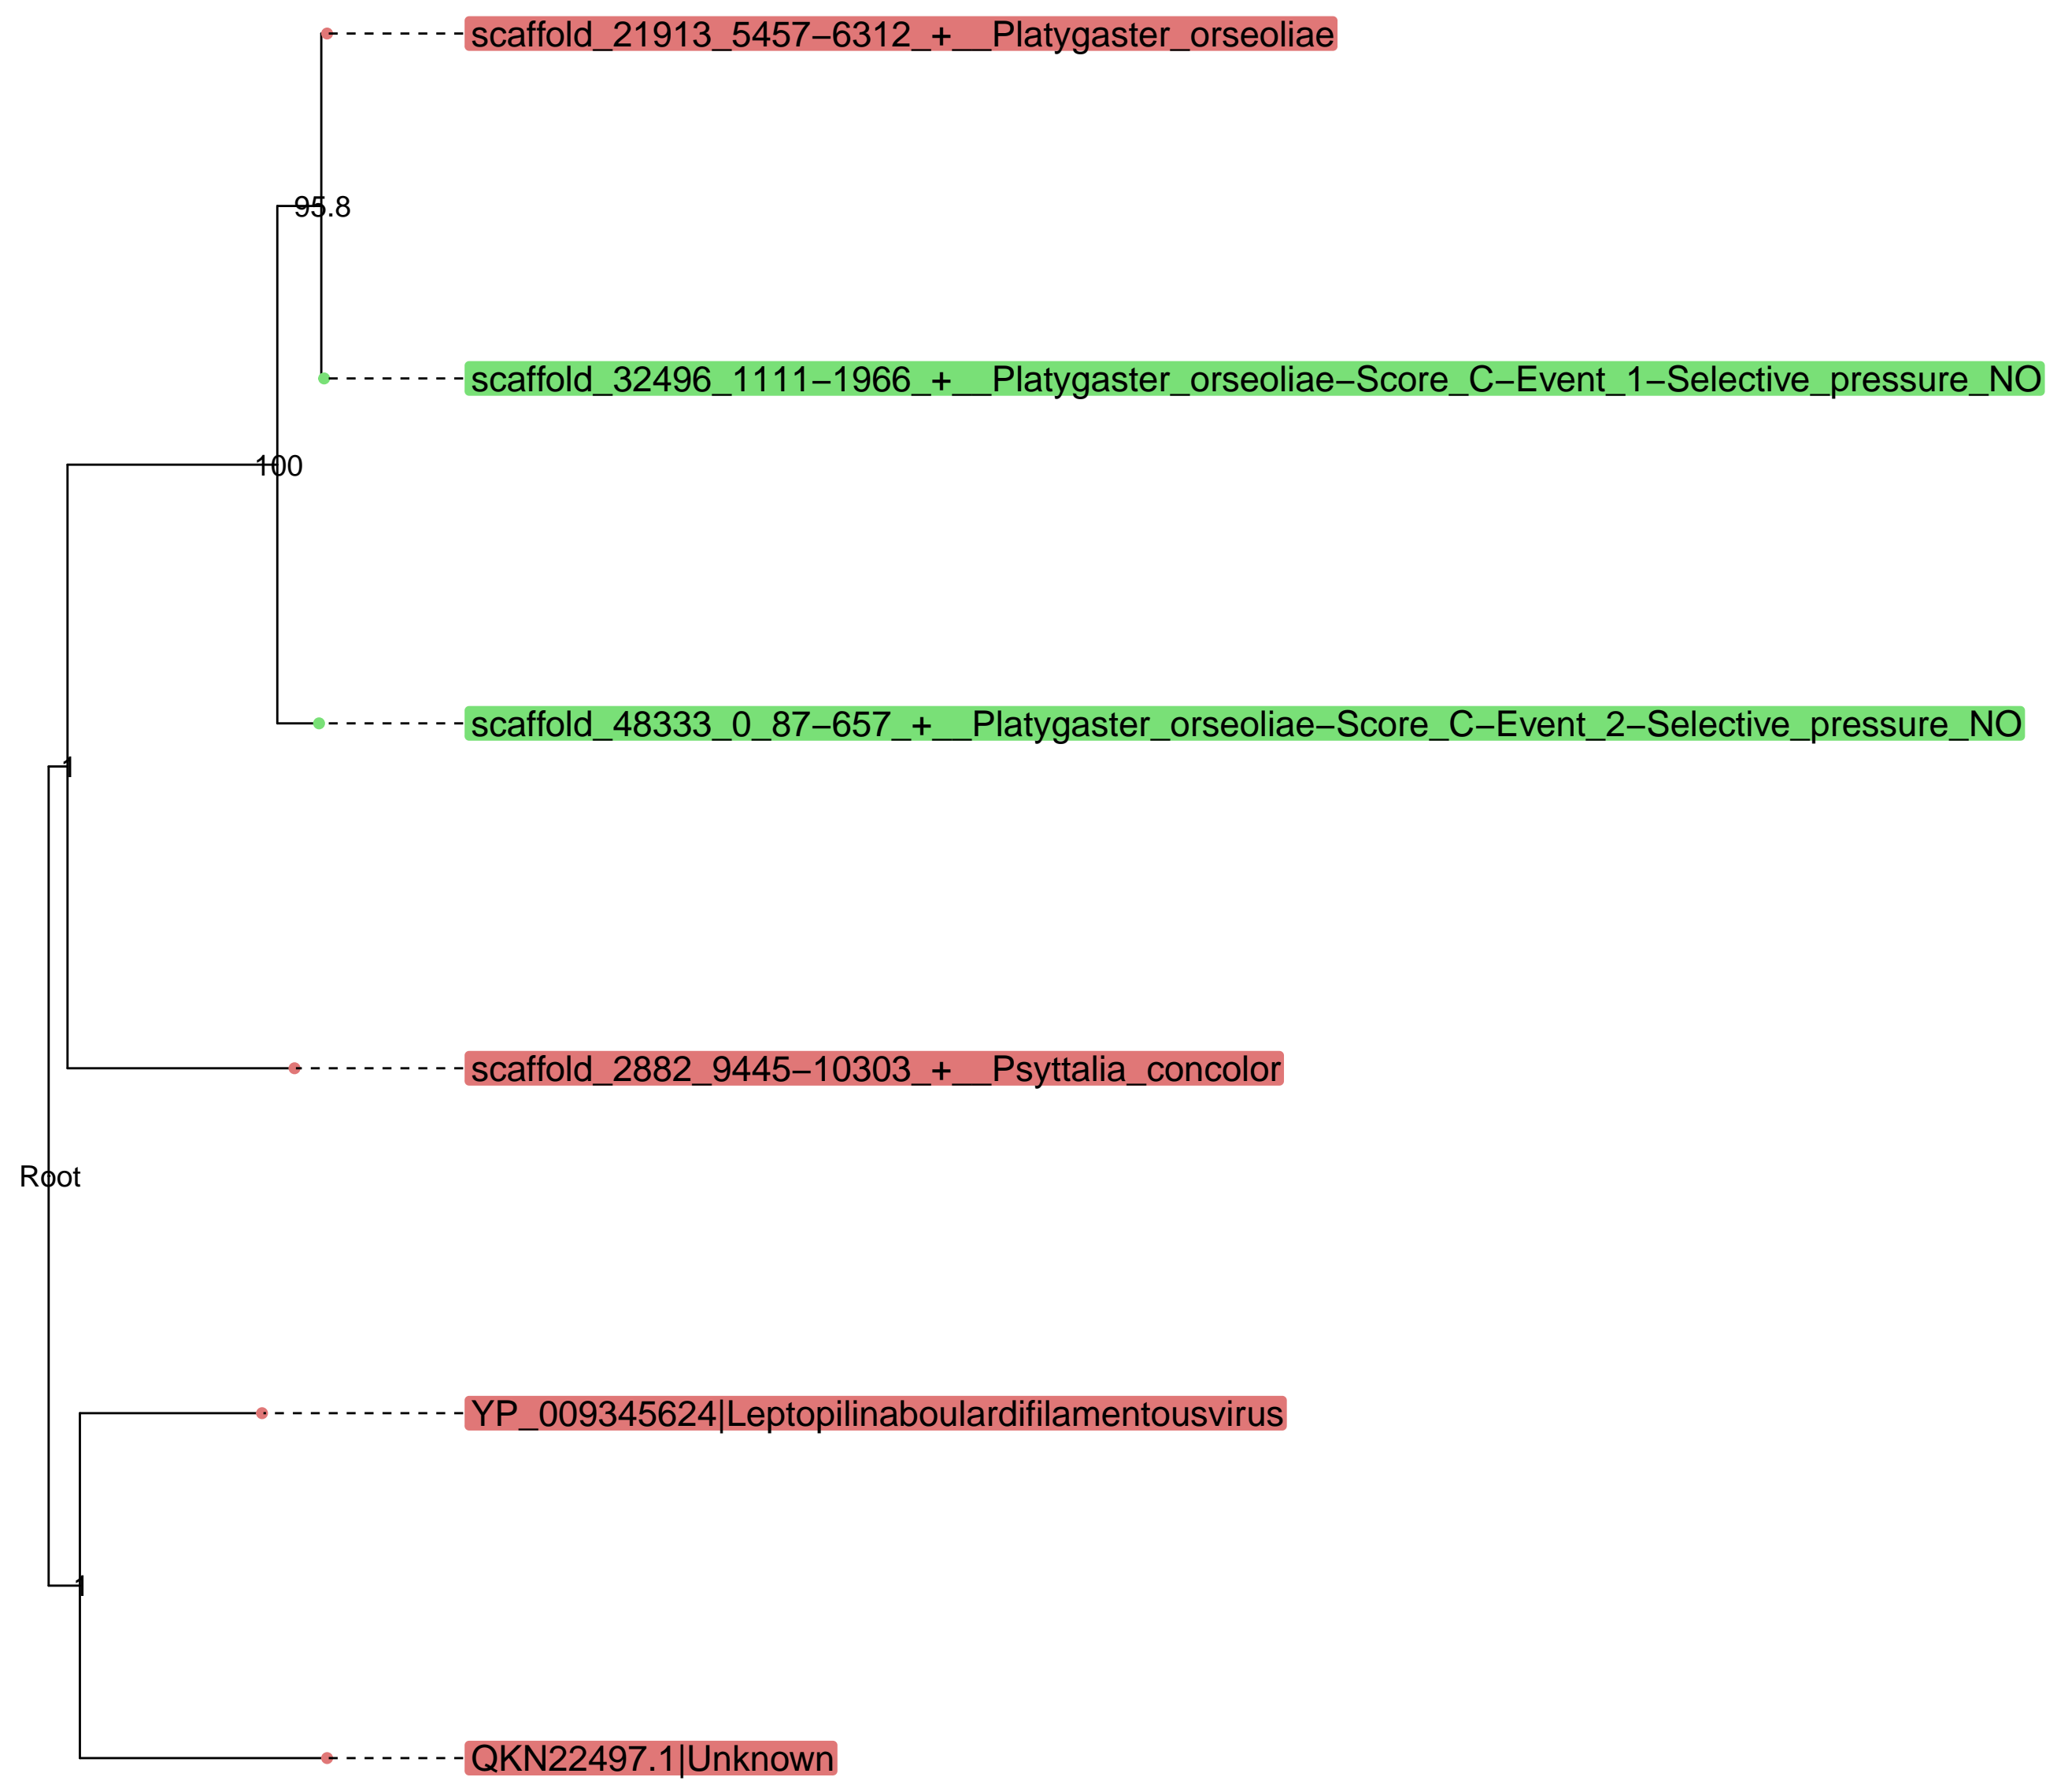

Cluster21657 – families involved : ['LbFV\_like'] – putative protein : ['Putative lecithine cholesterol acyltransferase']

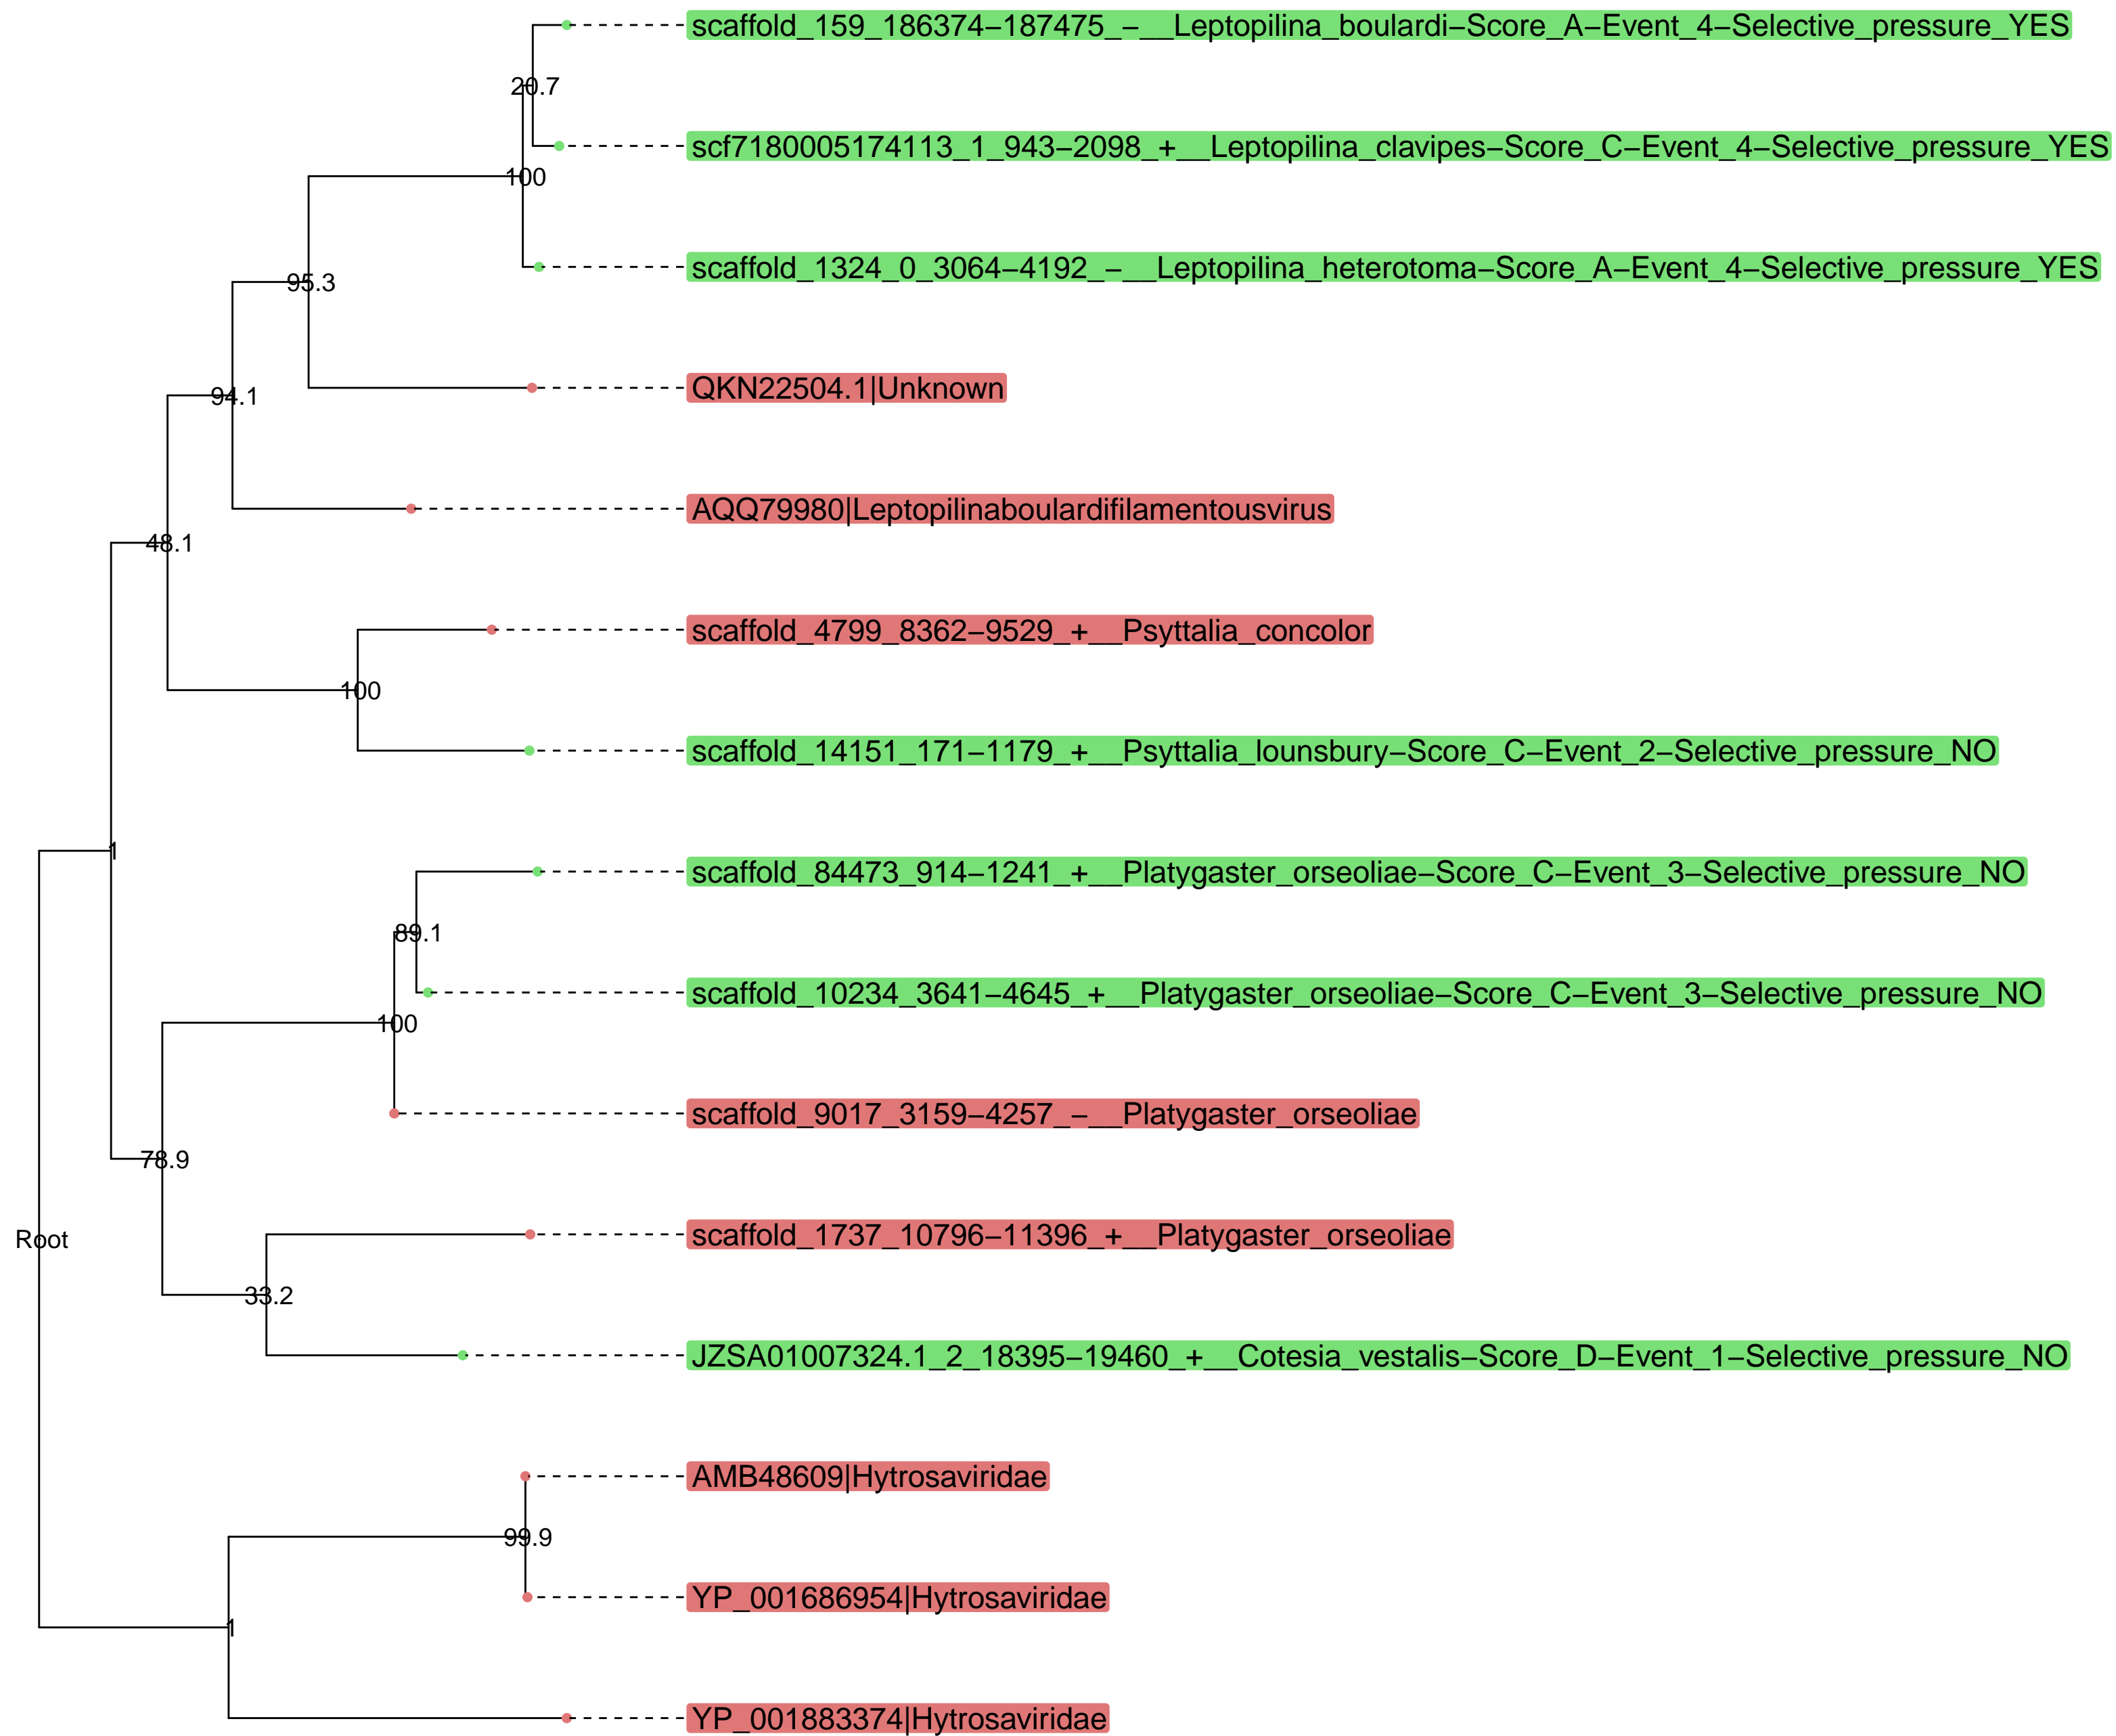

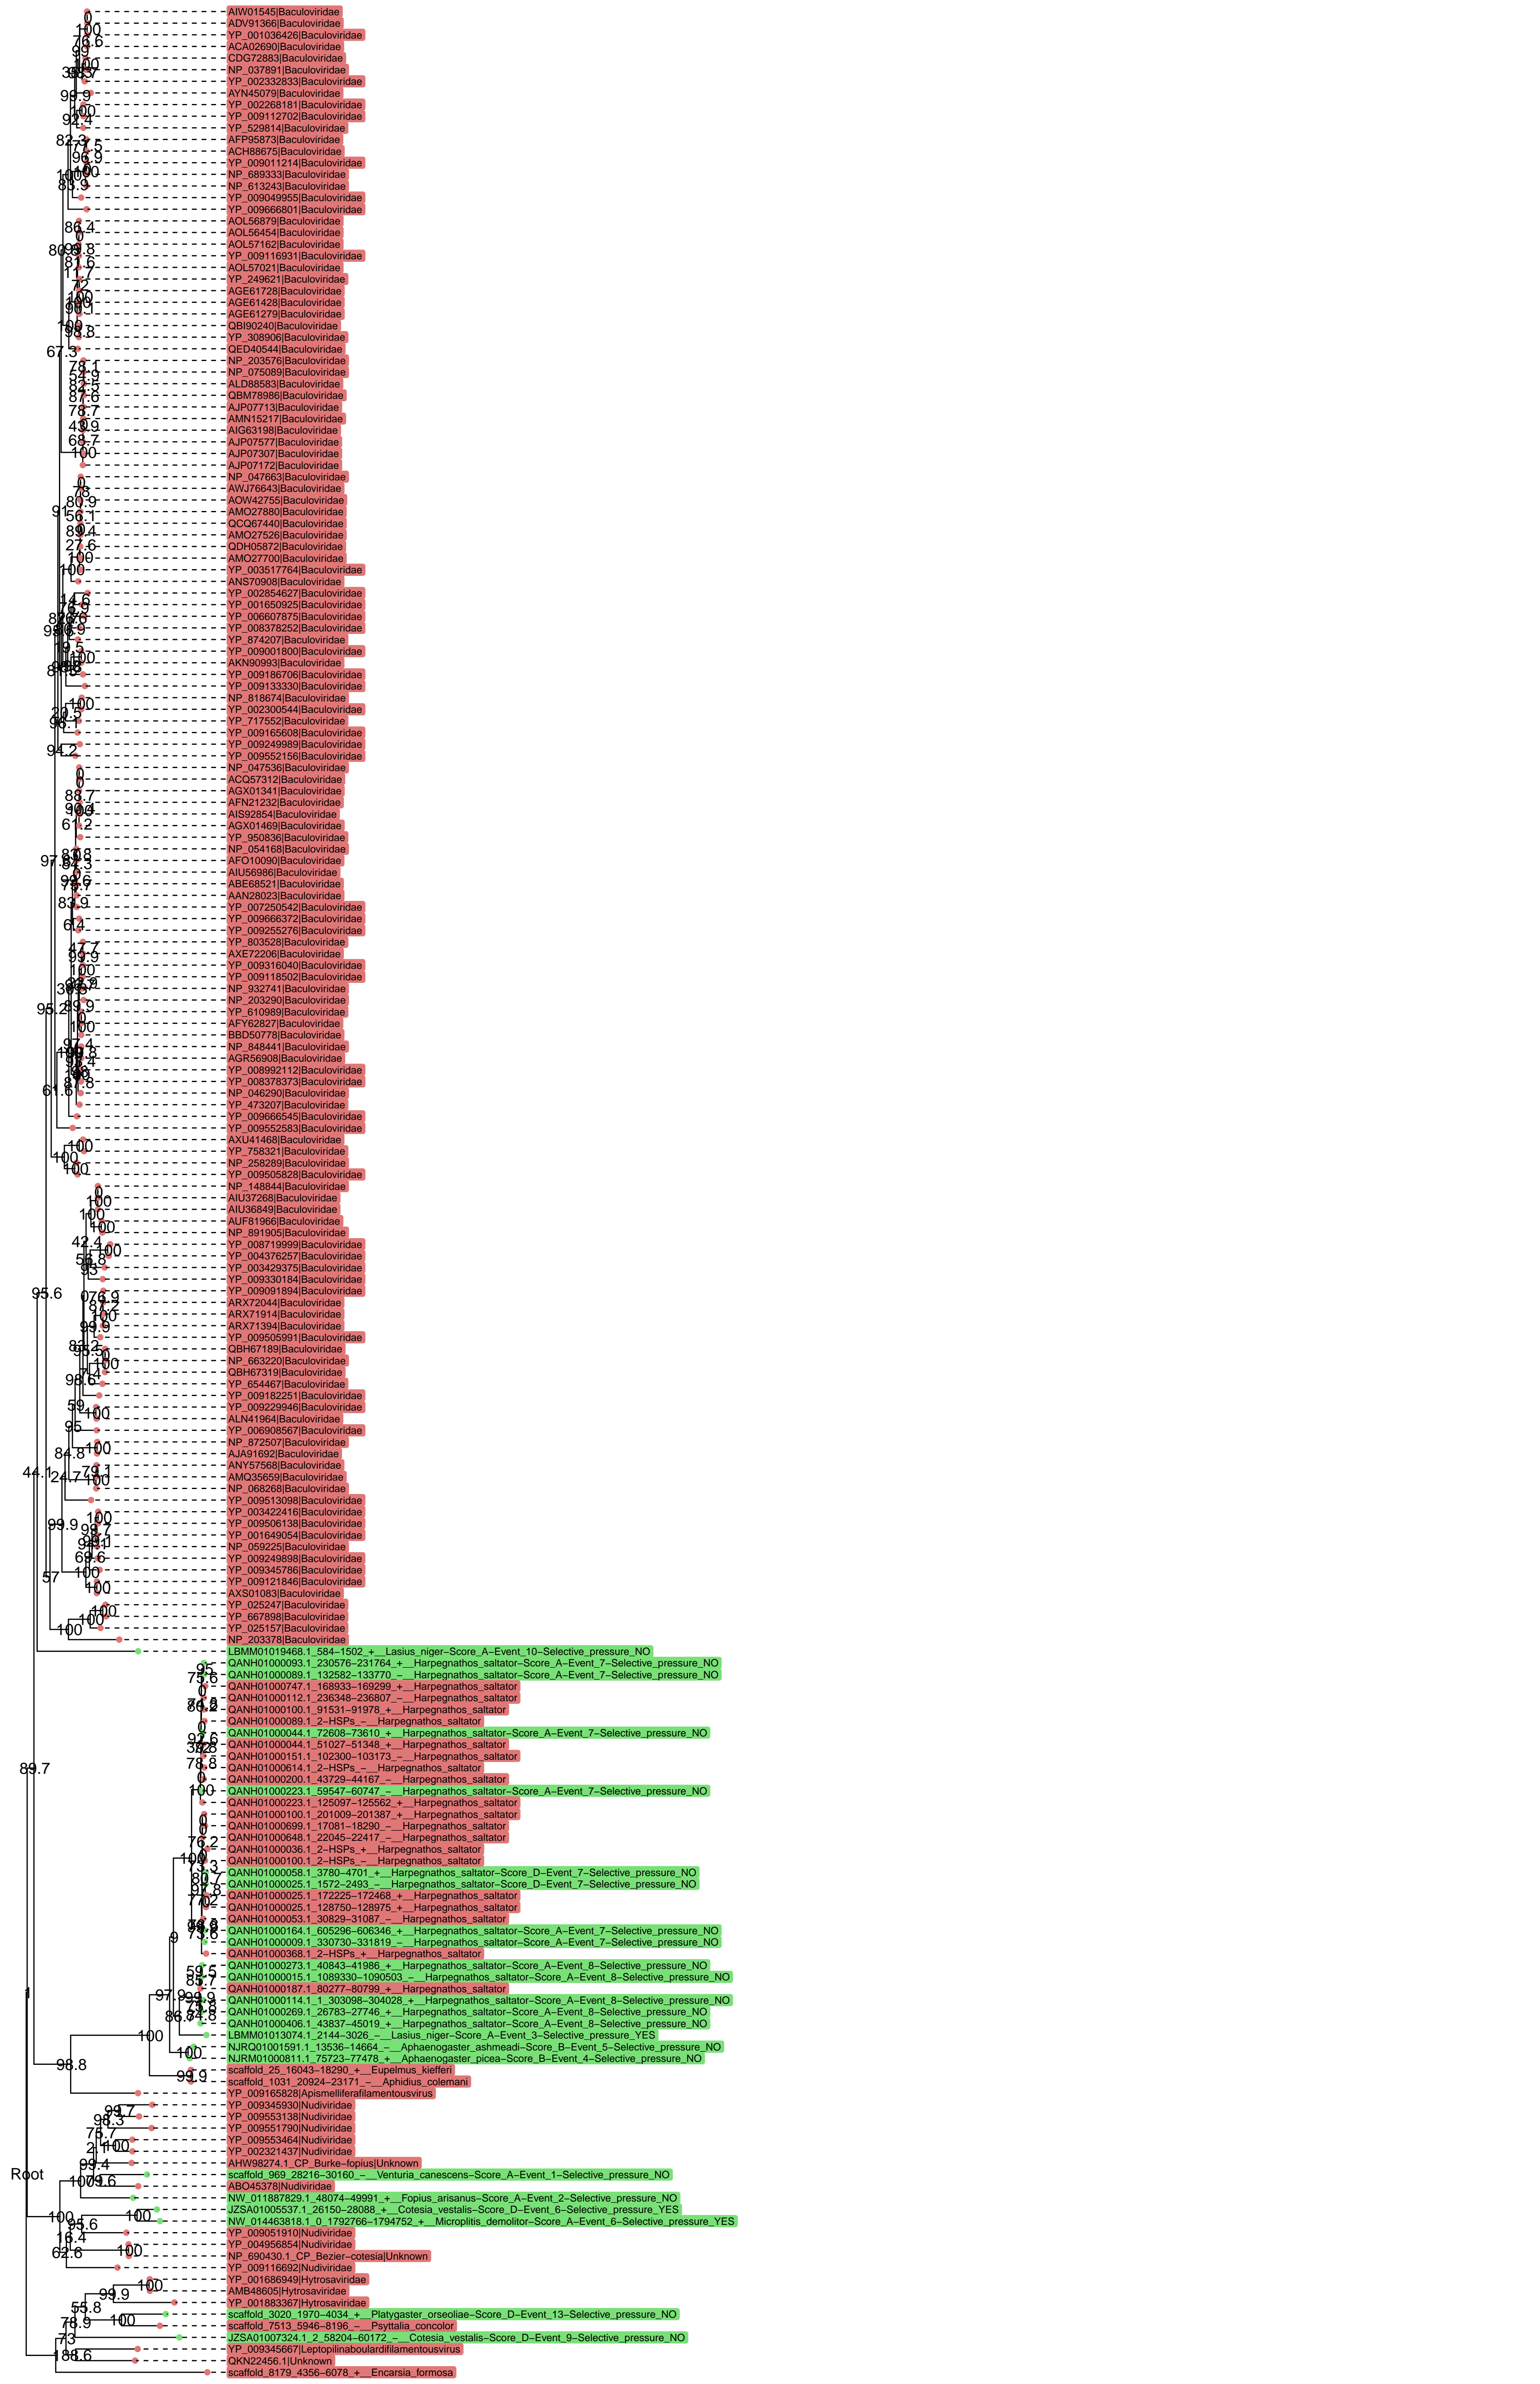



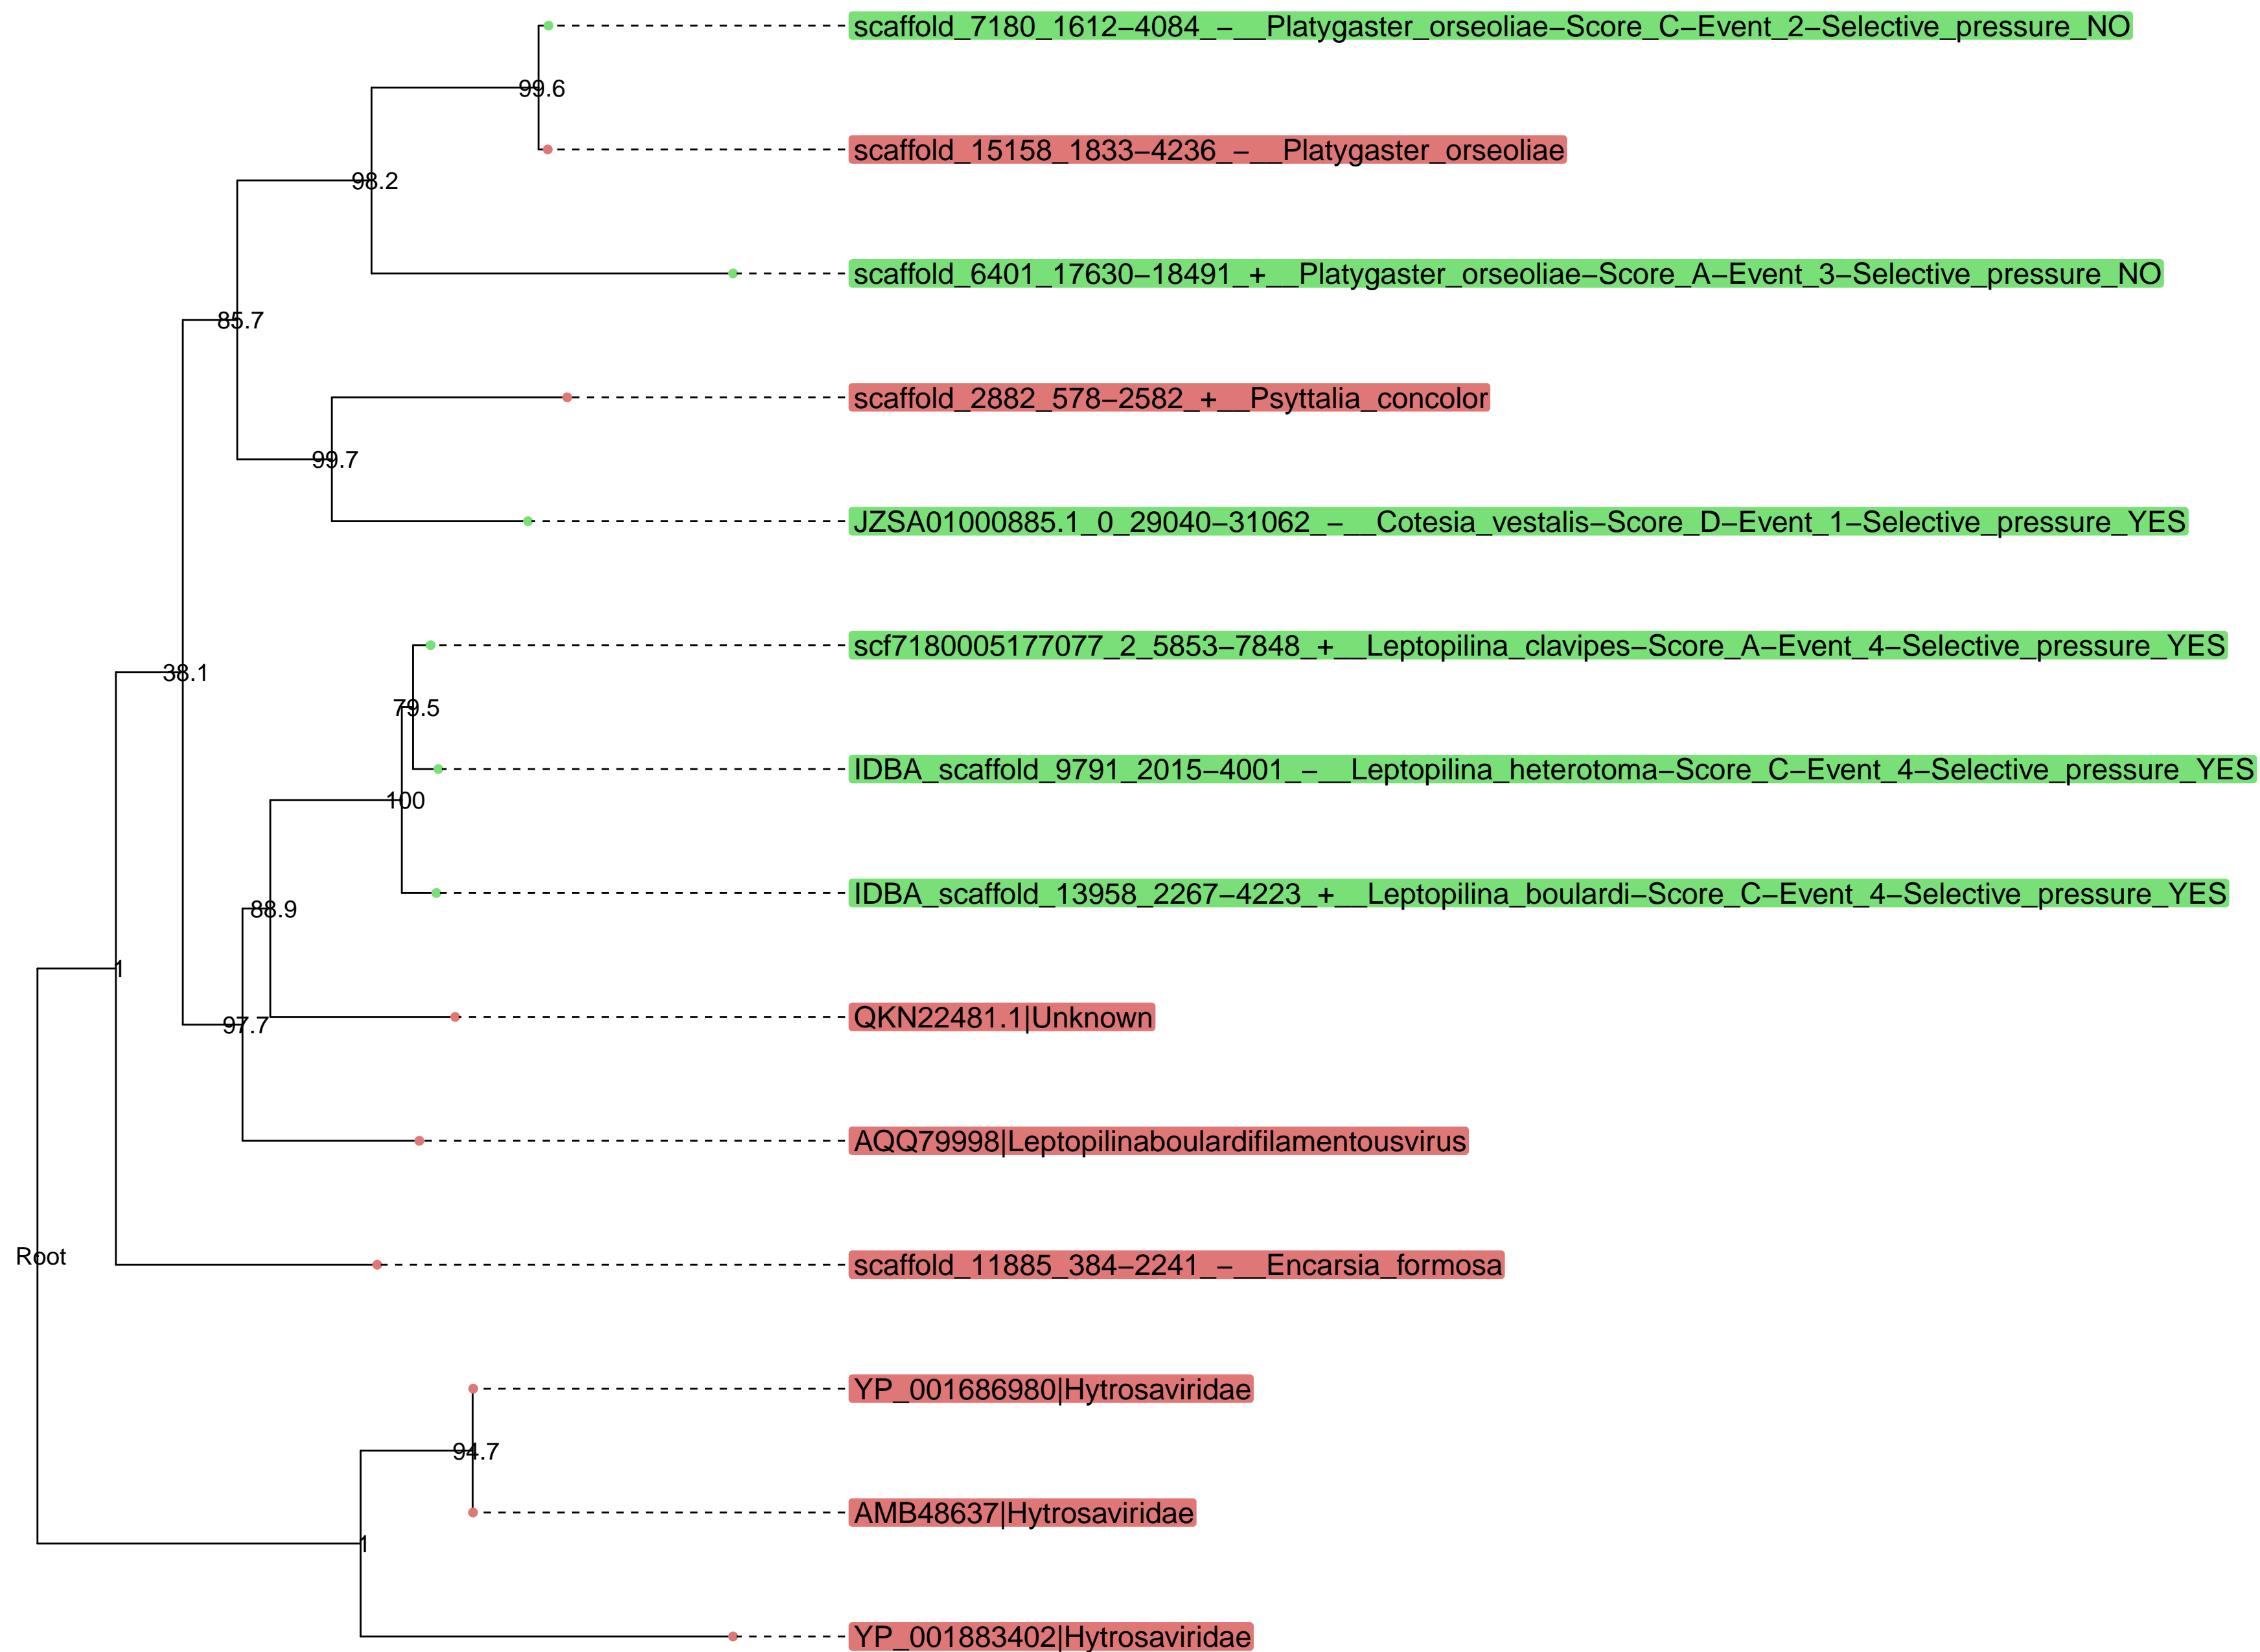

Cluster17683 – families involved : ['Baculoviridae'] – putative protein : ['Golgin subfamily A member 7/ERF4 family']

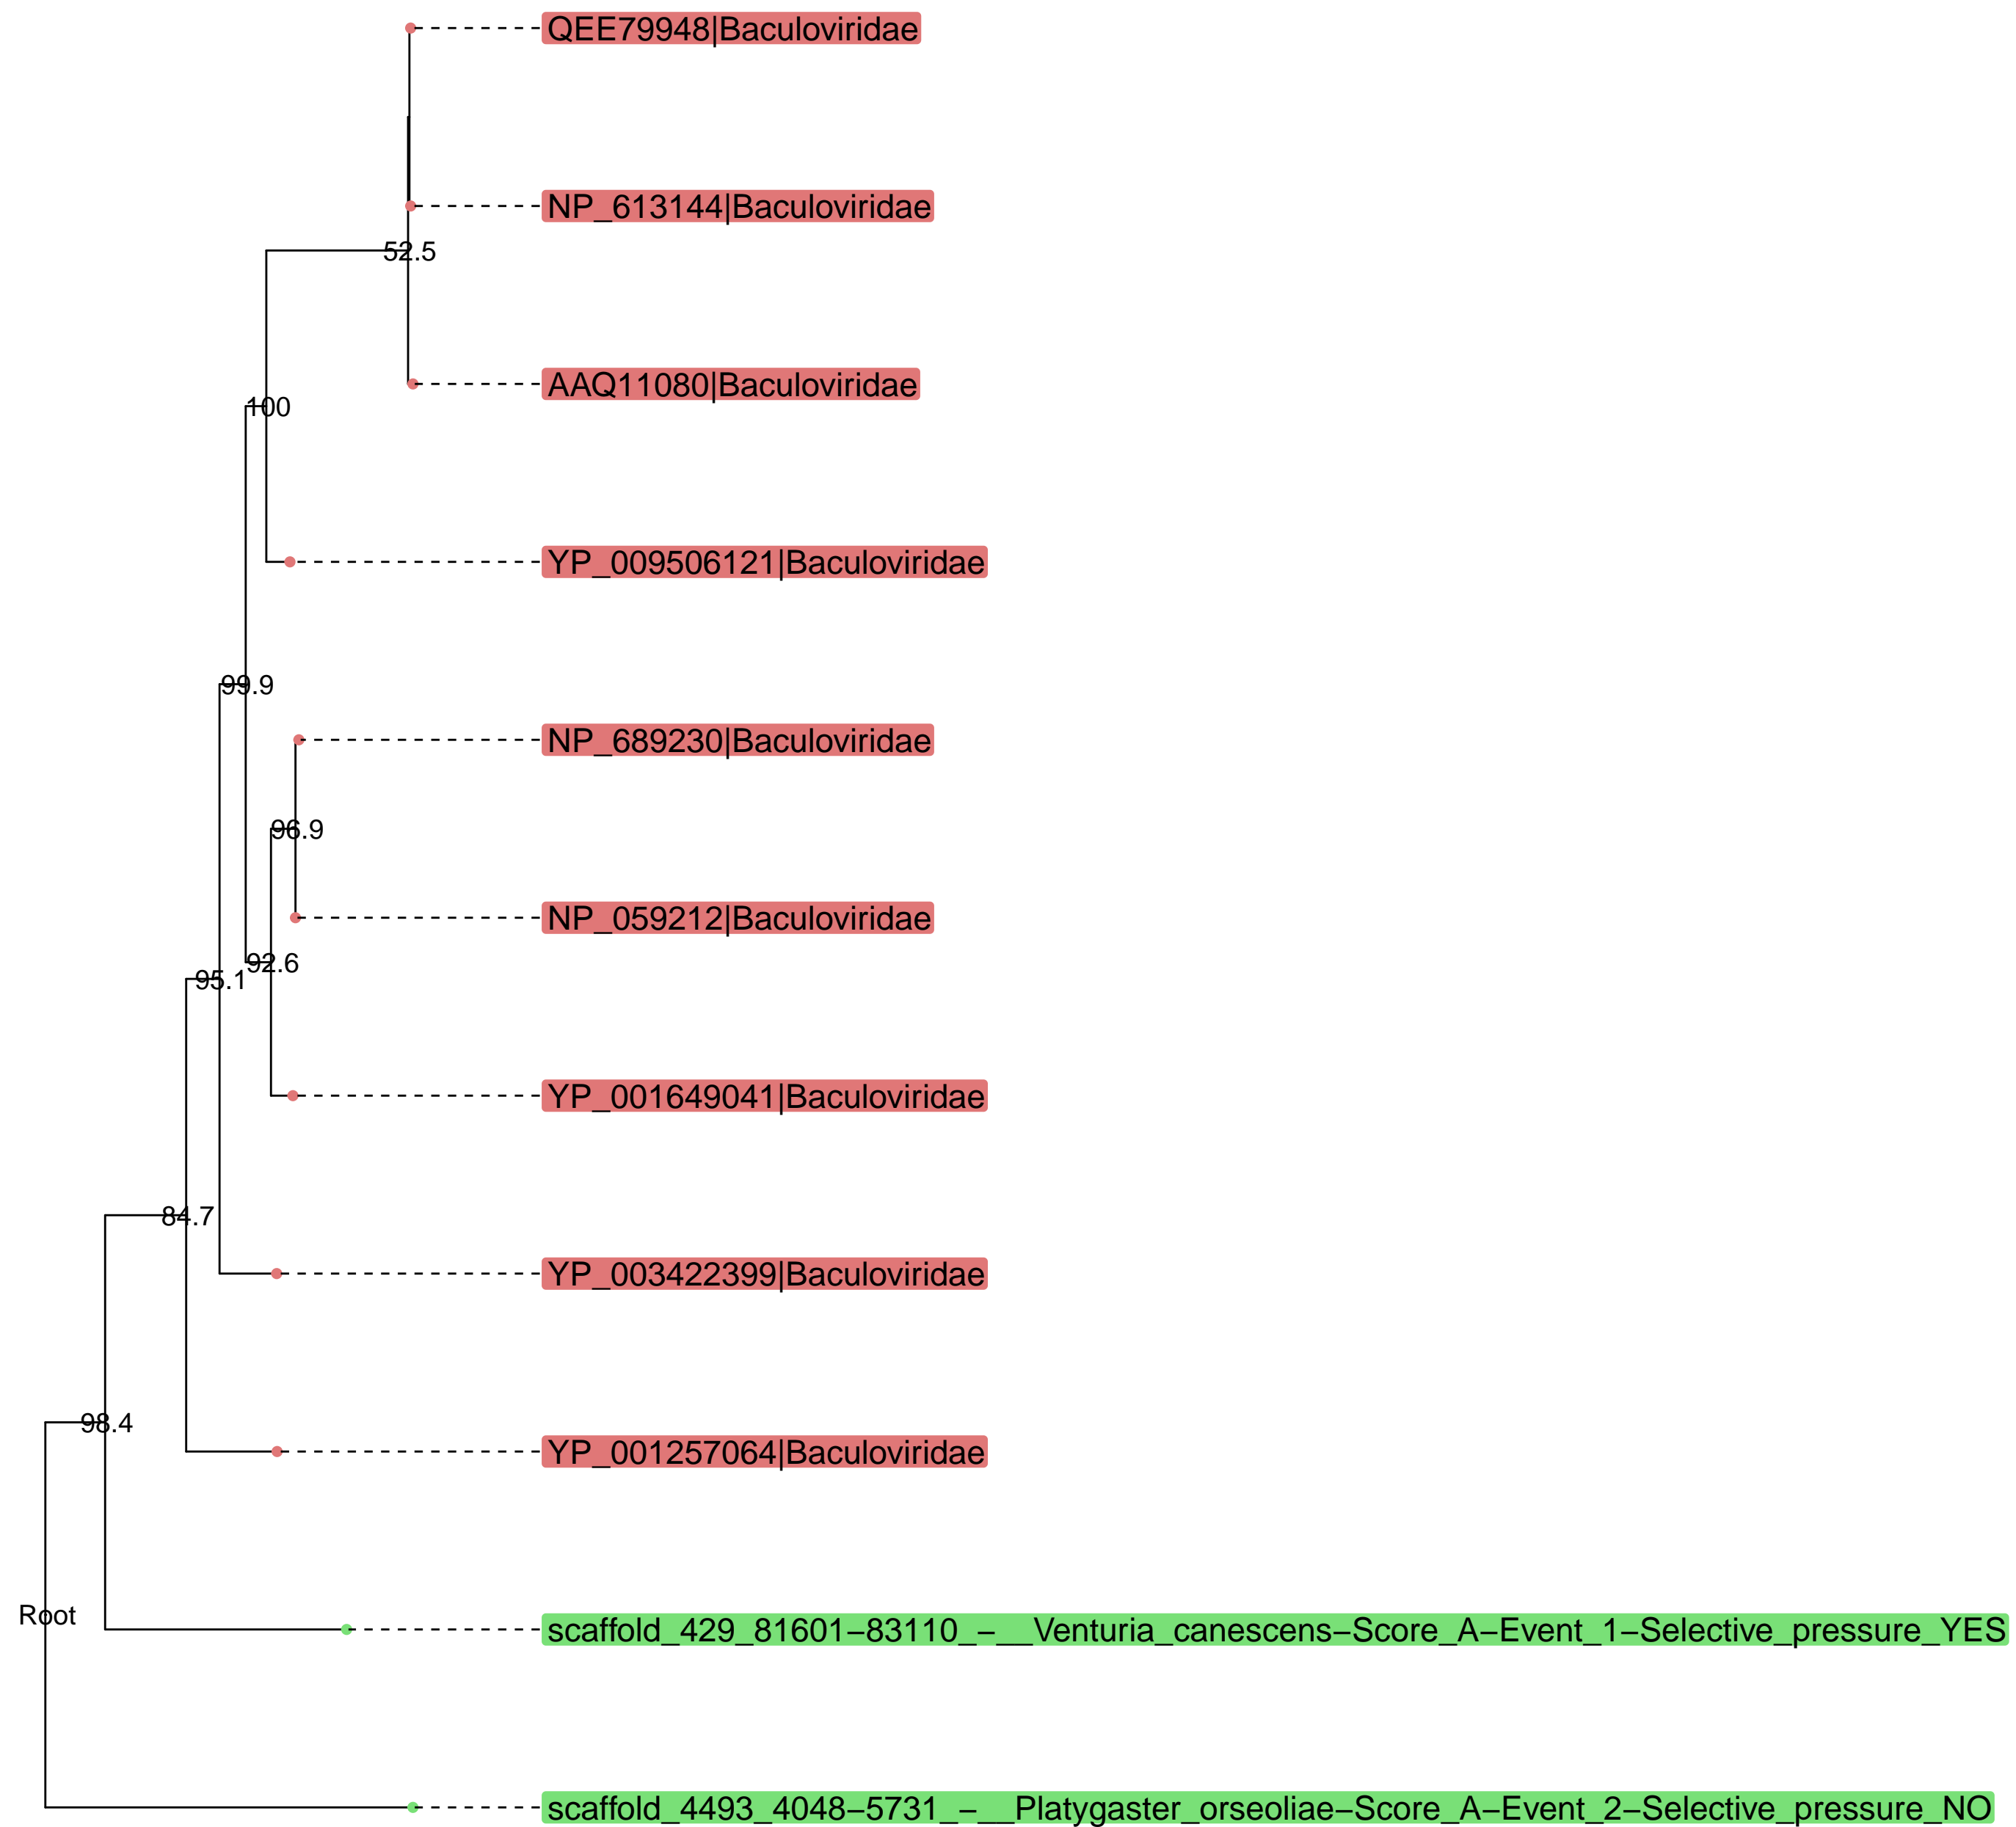

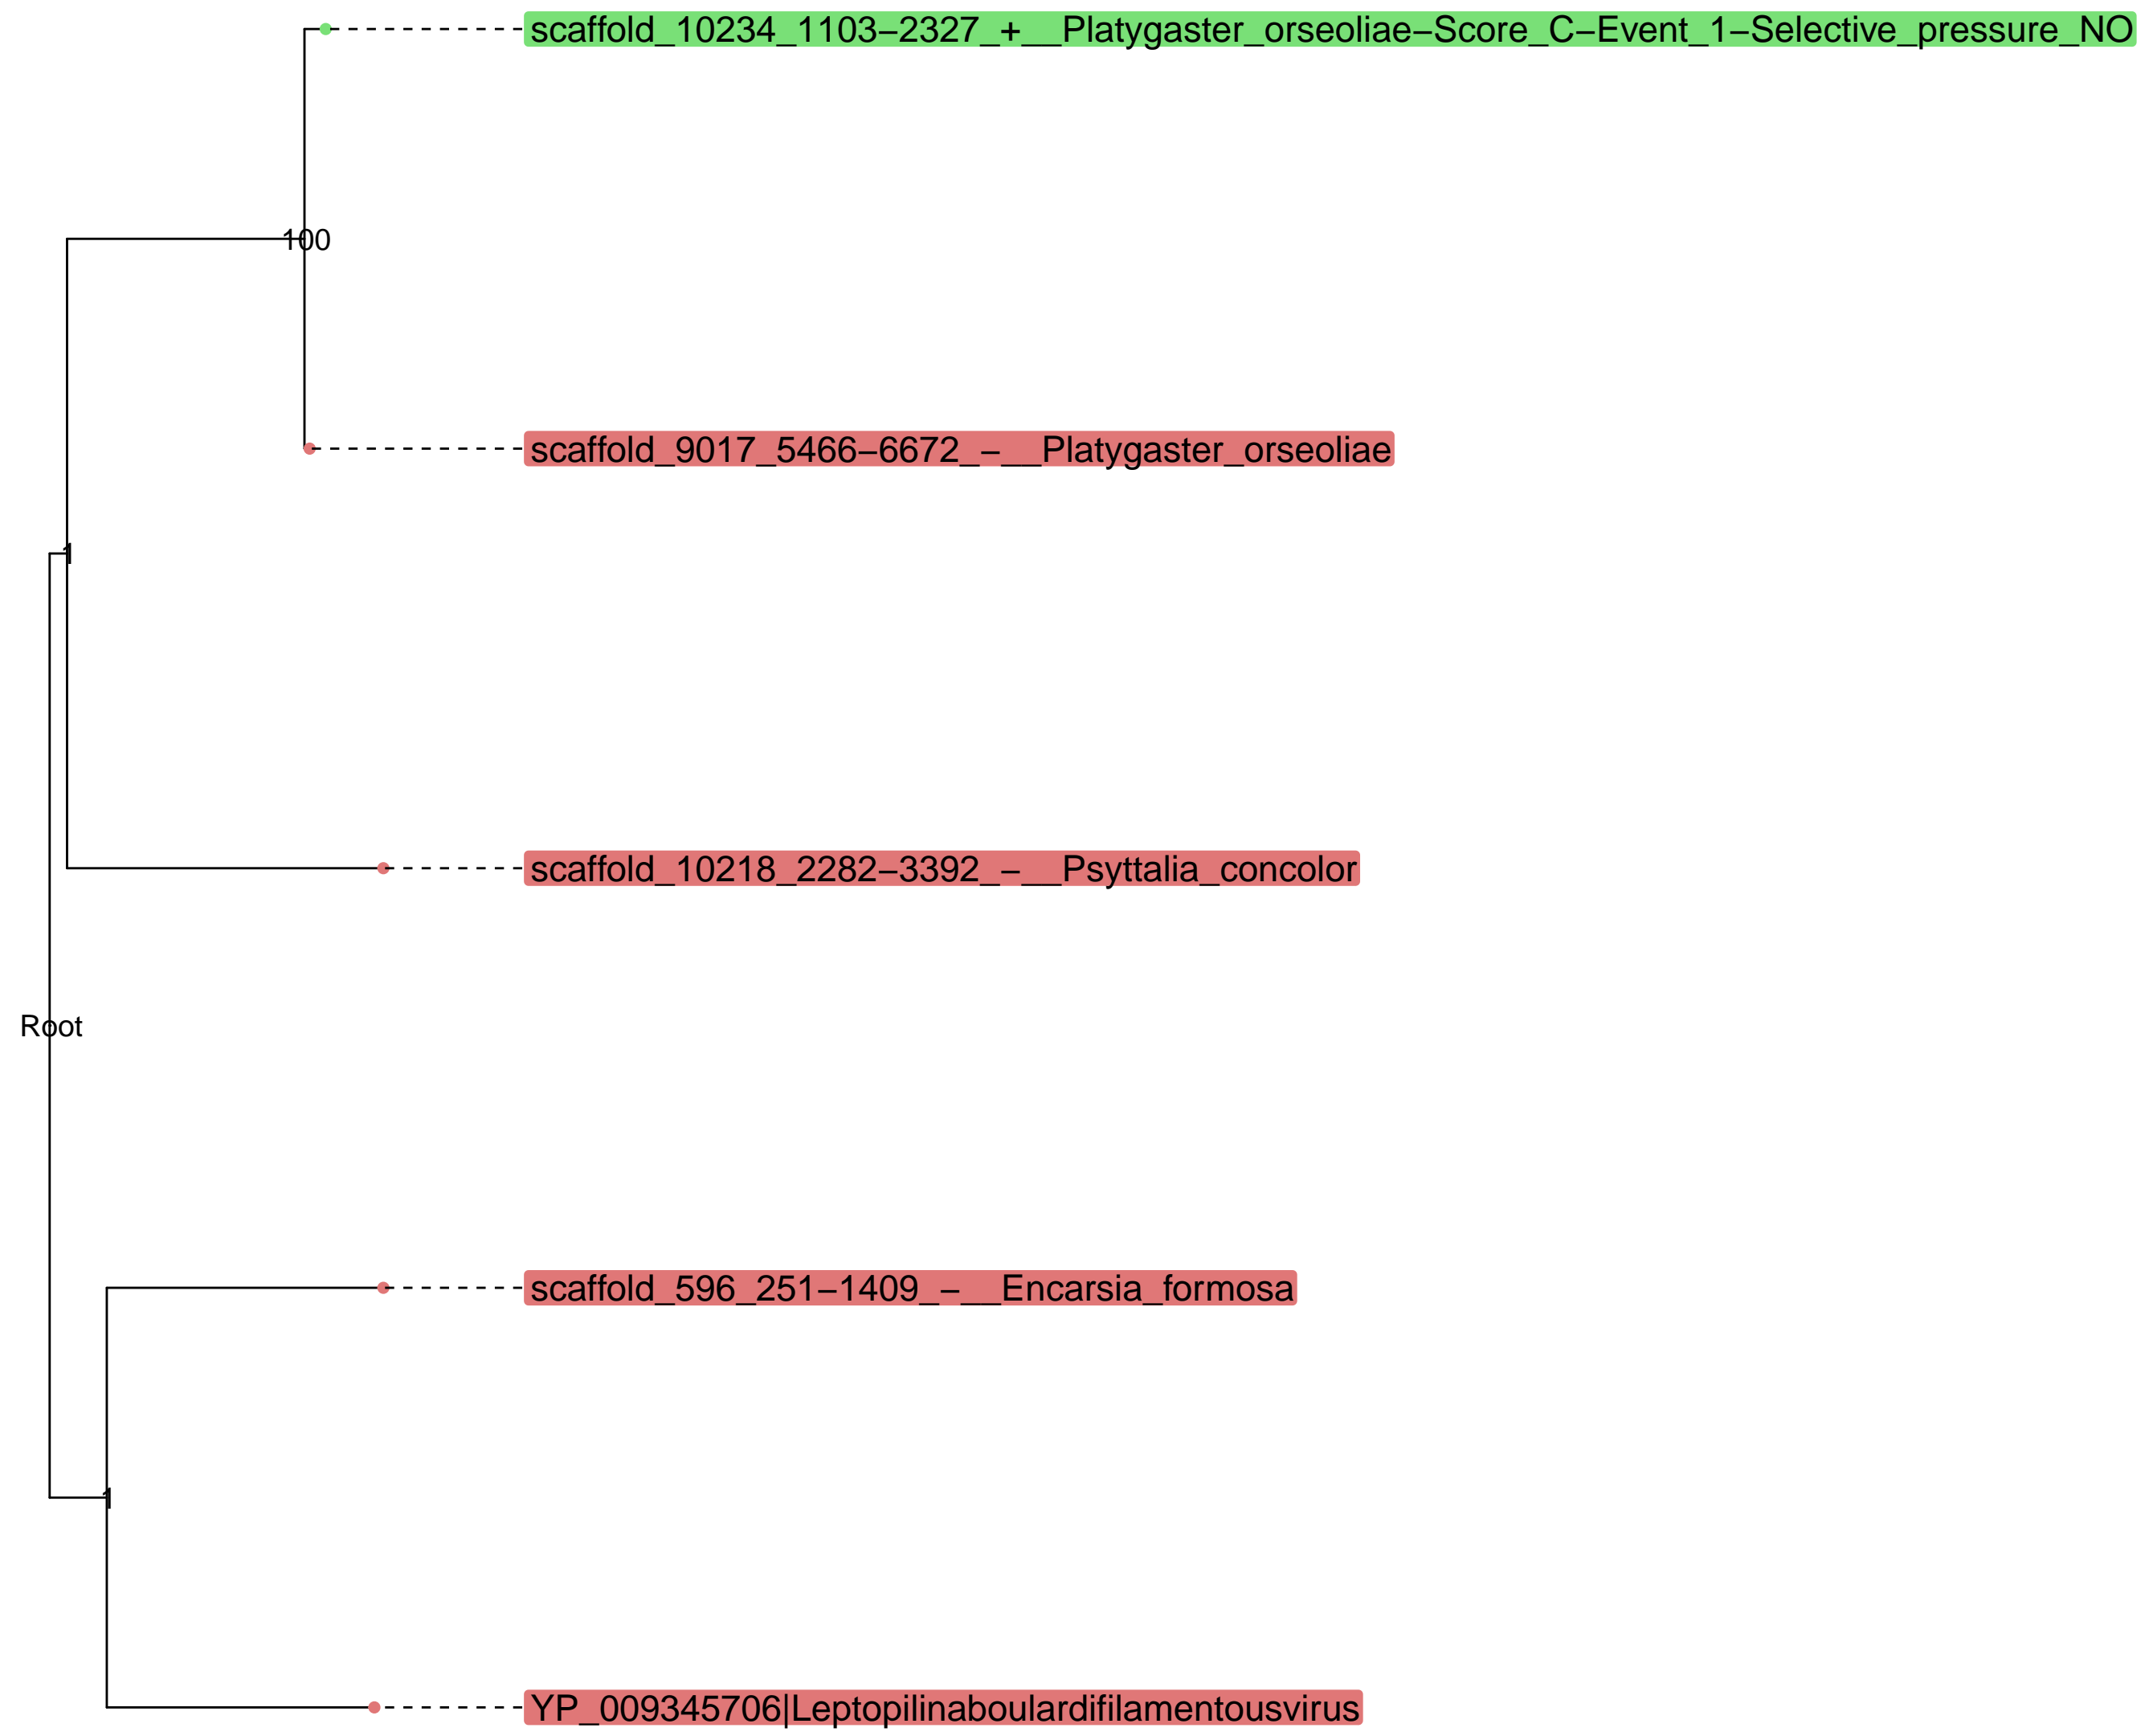

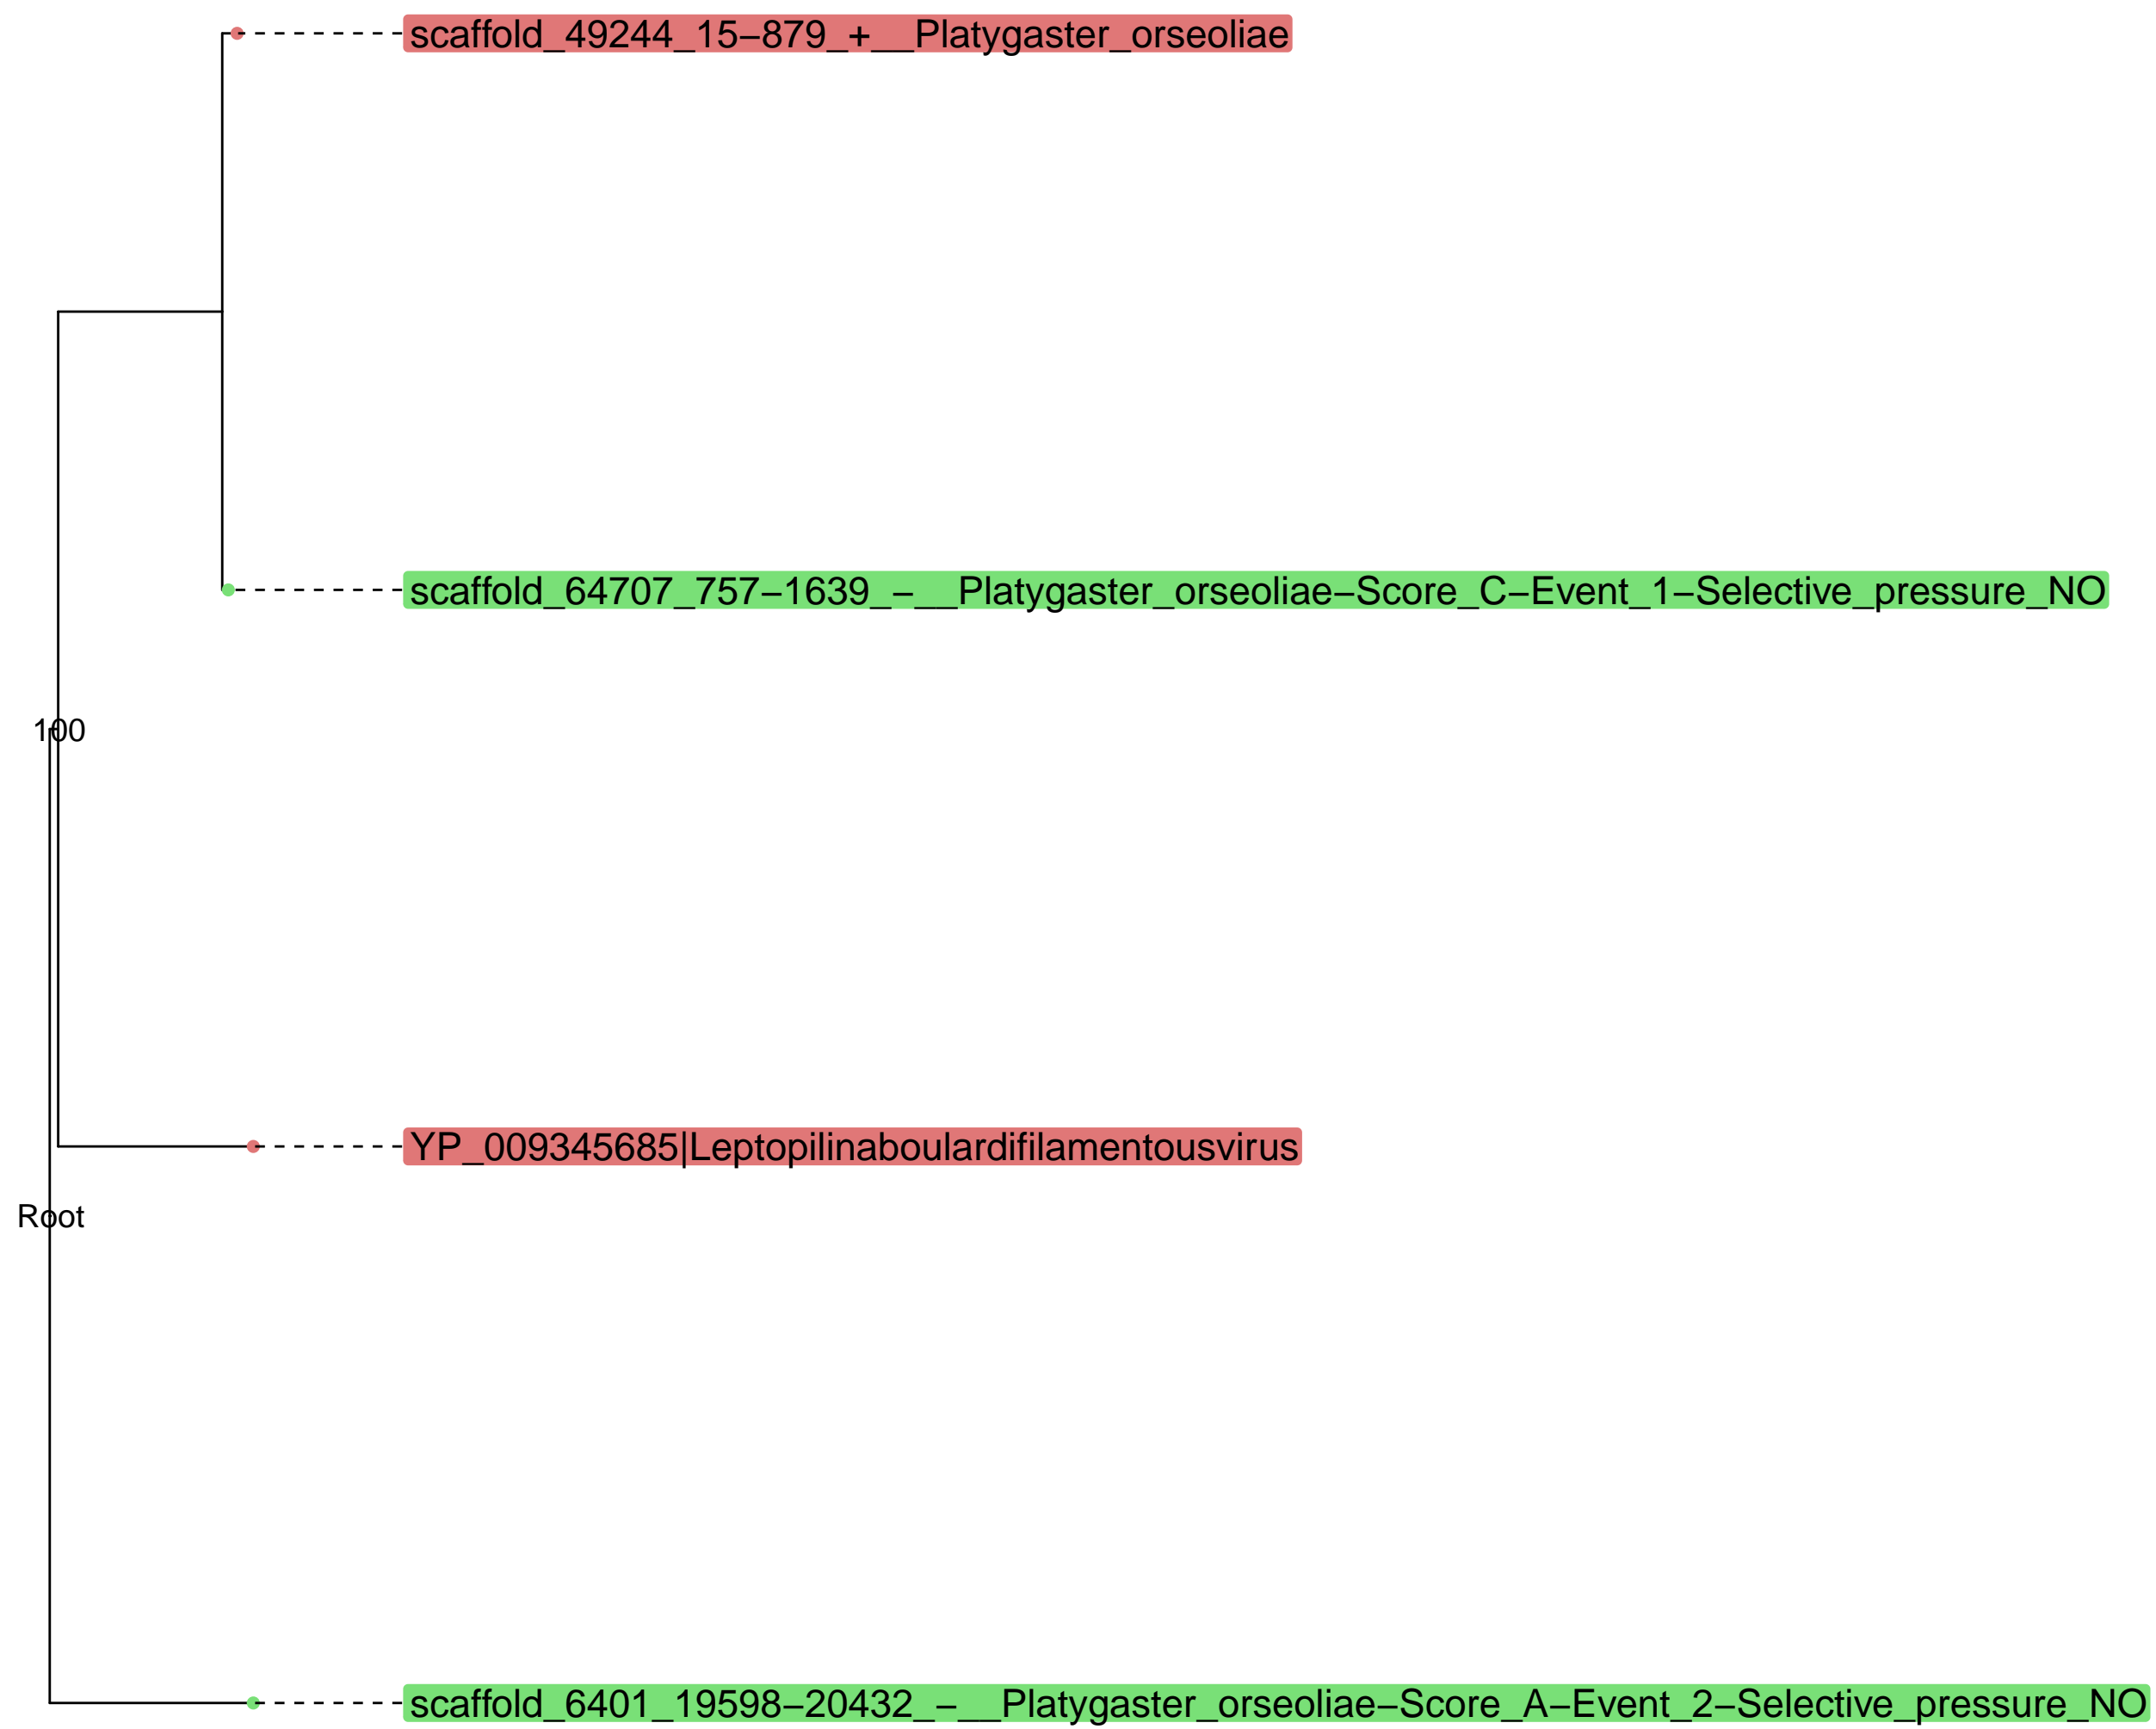

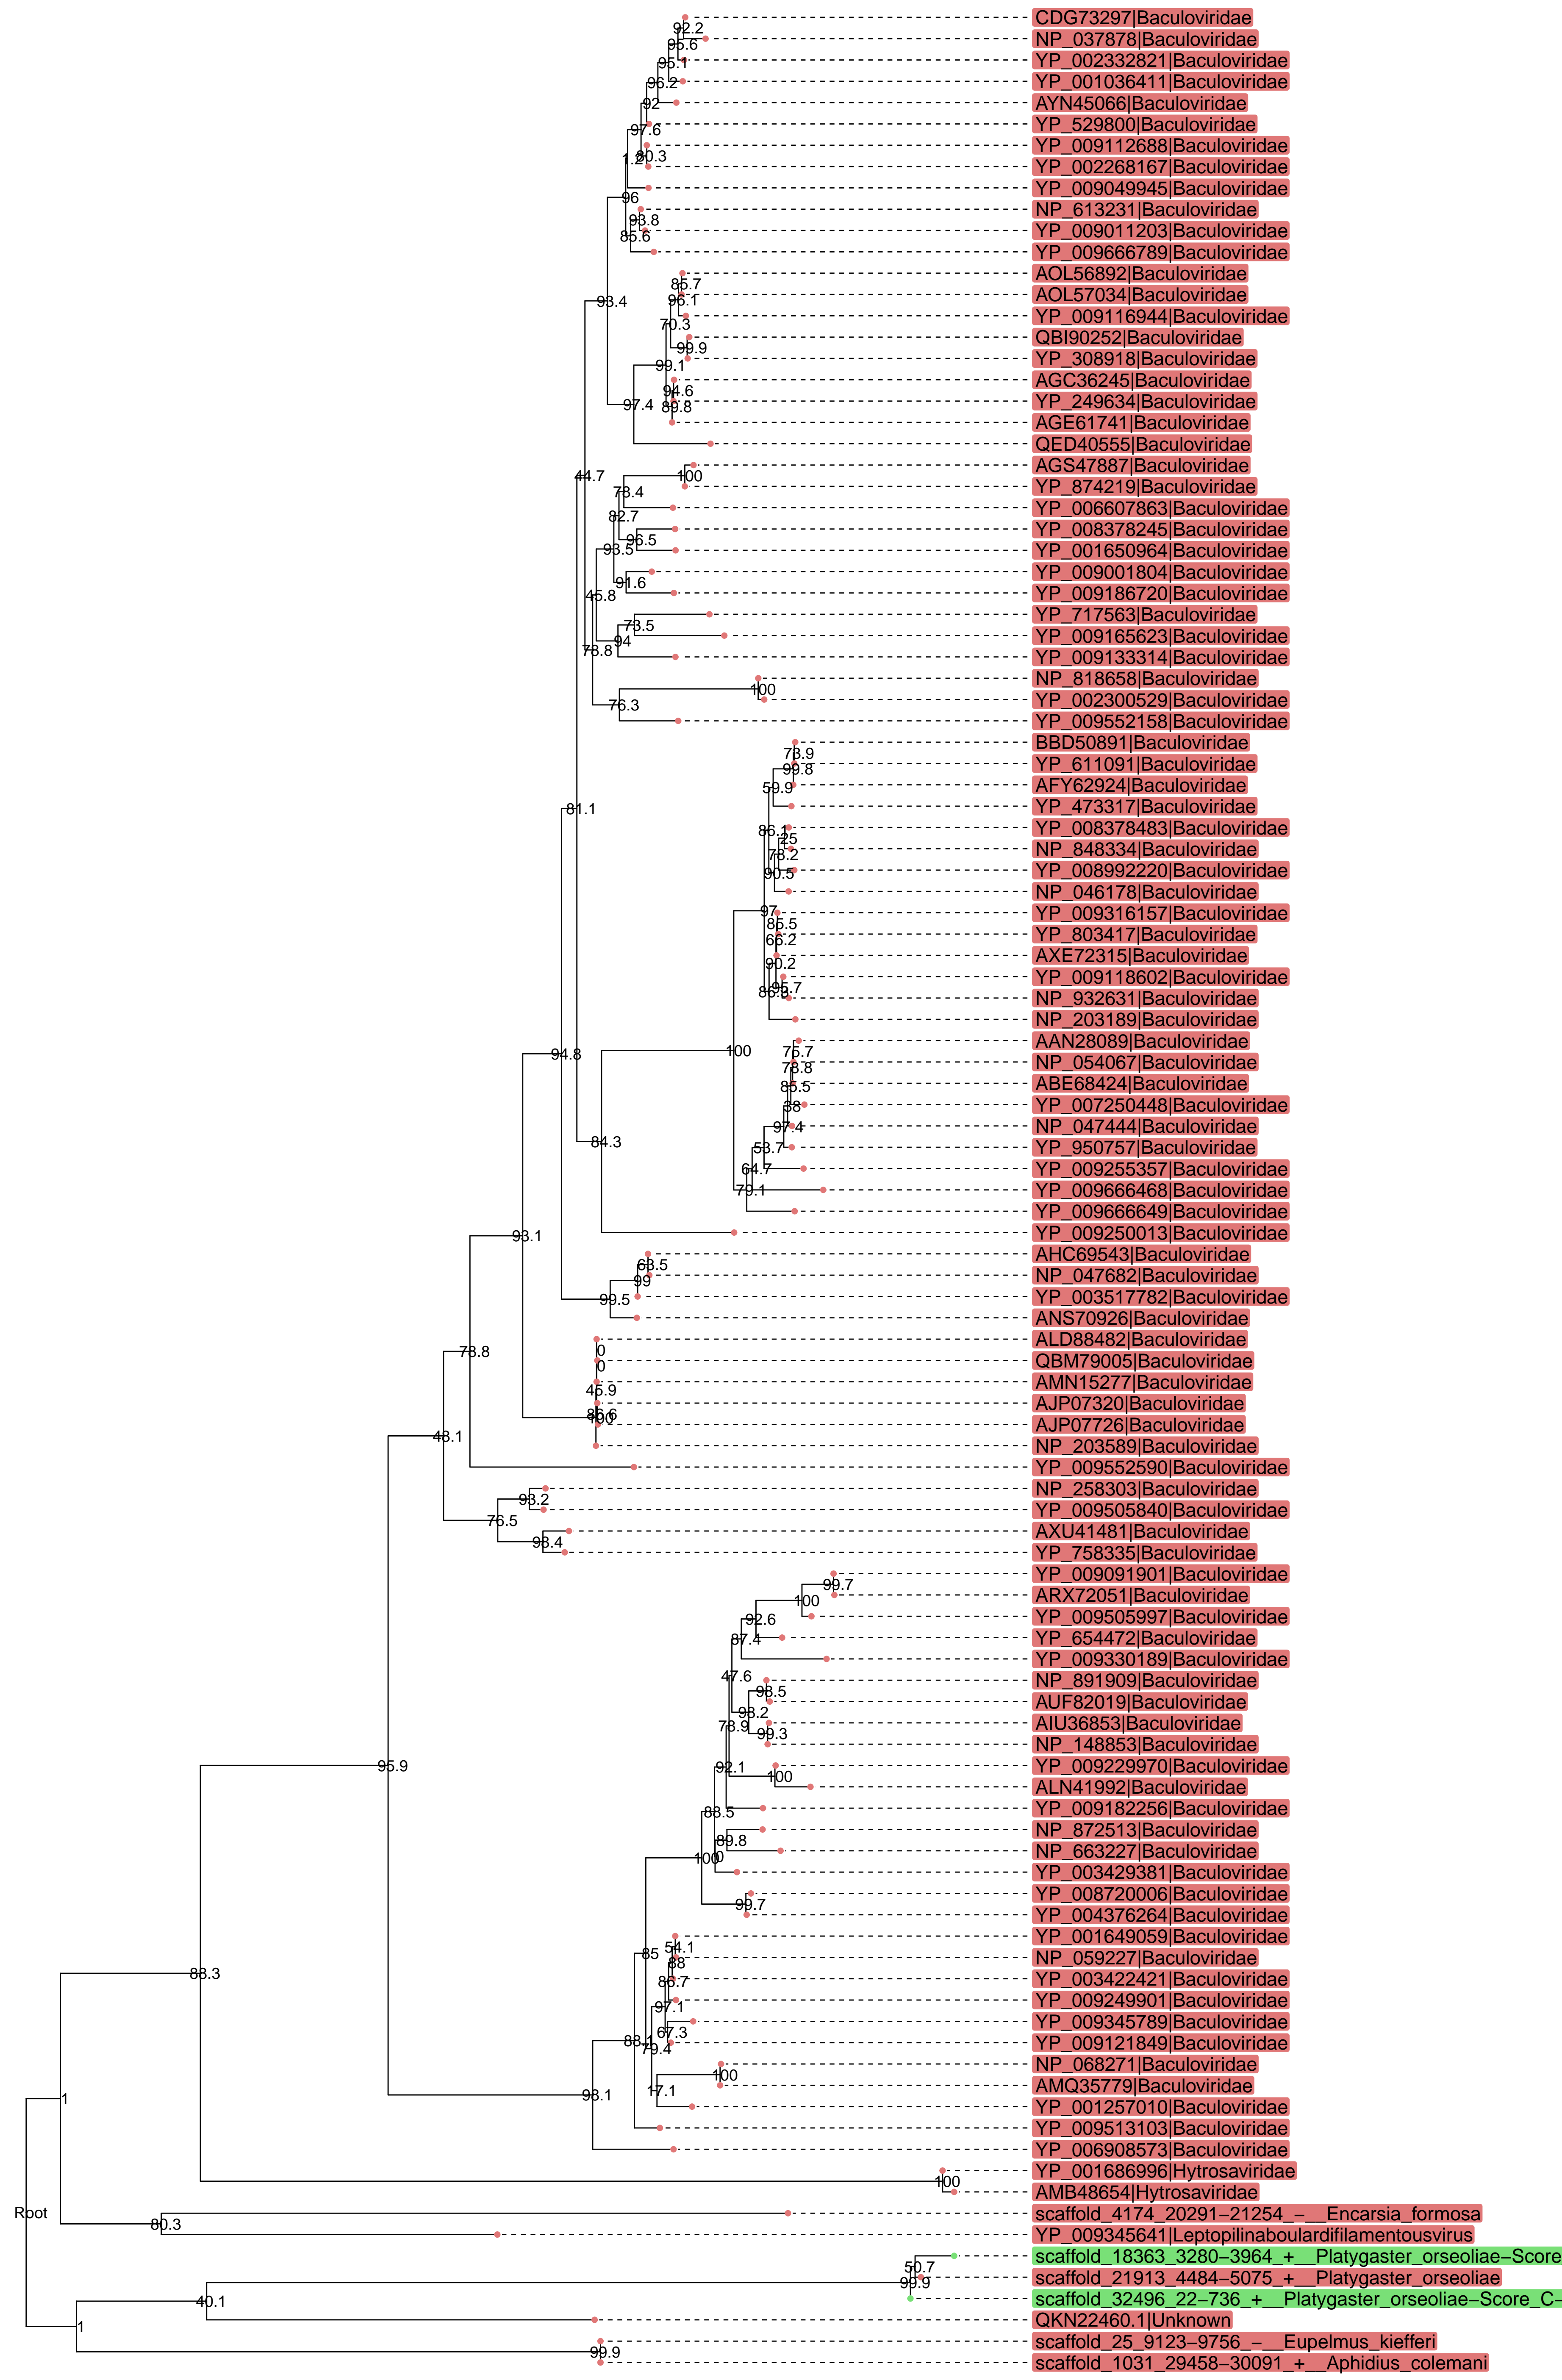

- CDG73297|Baculoviridae
- NP\_037878|Baculoviridae
- YP\_002332821|Baculoviridae
- YP\_001036411|Baculoviridae
- AYN45066|Baculoviridae
- YP\_529800|Baculoviridae
- YP\_009112688|Baculoviridae
- YP\_002268167|Baculoviridae
- YP\_009049945|Baculoviridae
- NP\_613231|Baculoviridae
- YP\_009011203|Baculoviridae
- YP\_009666789|Baculoviridae
- AOL56892|Baculoviridae
- AOL57034|Baculoviridae
- YP\_009116944|Baculoviridae
- QBI90252|Baculoviridae
- YP\_308918|Baculoviridae
- AGC36245|Baculoviridae
- YP\_249634|Baculoviridae
- AGE61741|Baculoviridae
- QED40555|Baculoviridae
- AGS47887|Baculoviridae
- YP\_874219|Baculoviridae
- YP\_006607863|Baculoviridae
- YP\_008378245|Baculoviridae
- YP\_001650964|Baculoviridae
- YP\_009001804|Baculoviridae
- YP\_009186720|Baculoviridae
- YP\_717563|Baculoviridae
- YP\_009165623|Baculoviridae
- YP\_009133314|Baculoviridae
- NP\_818658|Baculoviridae
- YP\_002300529|Baculoviridae
- YP\_009552158|Baculoviridae
- BBD50891|Baculoviridae
- YP\_611091|Baculoviridae
- AFY62924|Baculoviridae
- YP\_473317|Baculoviridae
- YP\_008378483|Baculoviridae
- NP\_848334|Baculoviridae
- YP\_008992220|Baculoviridae
- NP\_046178|Baculoviridae
- YP\_009316157|Baculoviridae
- YP\_803417|Baculoviridae
- AXE72315|Baculoviridae
- YP\_009118602|Baculoviridae
- NP\_932631|Baculoviridae
- NP\_203189|Baculoviridae
- AAN28089|Baculoviridae
- NP\_054067|Baculoviridae
- ABE68424|Baculoviridae
- YP\_007250448|Baculoviridae
- NP\_047444|Baculoviridae
- YP\_950757|Baculoviridae
- YP\_009255357|Baculoviridae
- YP\_009666468|Baculoviridae
- YP\_009666649|Baculoviridae
- YP\_009250013|Baculoviridae
- AHC69543|Baculoviridae
- NP\_047682|Baculoviridae
- YP\_003517782|Baculoviridae
- ANS70926|Baculoviridae
- ALD88482|Baculoviridae
- QBM79005|Baculoviridae
- AMN15277|Baculoviridae
- AJP07320|Baculoviridae
- AJP07726|Baculoviridae
- NP\_203589|Baculoviridae
- YP\_009552590|Baculoviridae
- NP\_258303|Baculoviridae
- YP\_009505840|Baculoviridae
- AXU41481|Baculoviridae
- YP\_758335|Baculoviridae
- YP\_009091901|Baculoviridae
- ARX72051|Baculoviridae
- YP\_009505997|Baculoviridae
- YP\_654472|Baculoviridae
- YP\_009330189|Baculoviridae
- NP\_891909|Baculoviridae
- AUF82019|Baculoviridae
- AIU36853|Baculoviridae
- NP\_148853|Baculoviridae
- YP\_009229970|Baculoviridae
- ALN41992|Baculoviridae
- YP\_009182256|Baculoviridae
- NP\_872513|Baculoviridae
- NP\_663227|Baculoviridae
- YP\_003429381|Baculoviridae
- YP\_008720006|Baculoviridae
- YP\_004376264|Baculoviridae
- YP\_001649059|Baculoviridae
- NP\_059227|Baculoviridae
- YP\_003422421|Baculoviridae
- YP\_009249901|Baculoviridae
- YP\_009345789|Baculoviridae
- YP\_009121849|Baculoviridae
- NP\_068271|Baculoviridae
- AMQ35779|Baculoviridae
- YP\_001257010|Baculoviridae
- YP\_009513103|Baculoviridae
- YP\_006908573|Baculoviridae
- YP\_001686996|Hytrosaviridae
- AMB48654|Hytrosaviridae
- scaffold\_4174\_20291-21254 - Encarsia formosa
- scaffold\_18363\_3280-3964 + Platygaster orseoliae-Score
- scaffold\_21913\_4484-5075 + Platygaster orseoliae
- scaffold\_32496\_22-736 + Platygaster orseoliae-Score\_C
- QKN22460.1|Unknown
- scaffold\_25\_9123-9756 - Eupelmus kiefferi
- scaffold\_1031\_29458-30091 + Aphidius colemani

Cluster12537 – families involved : ['LbFV\_like'] – putative protein : ['Neurogenesis glycoprotein']

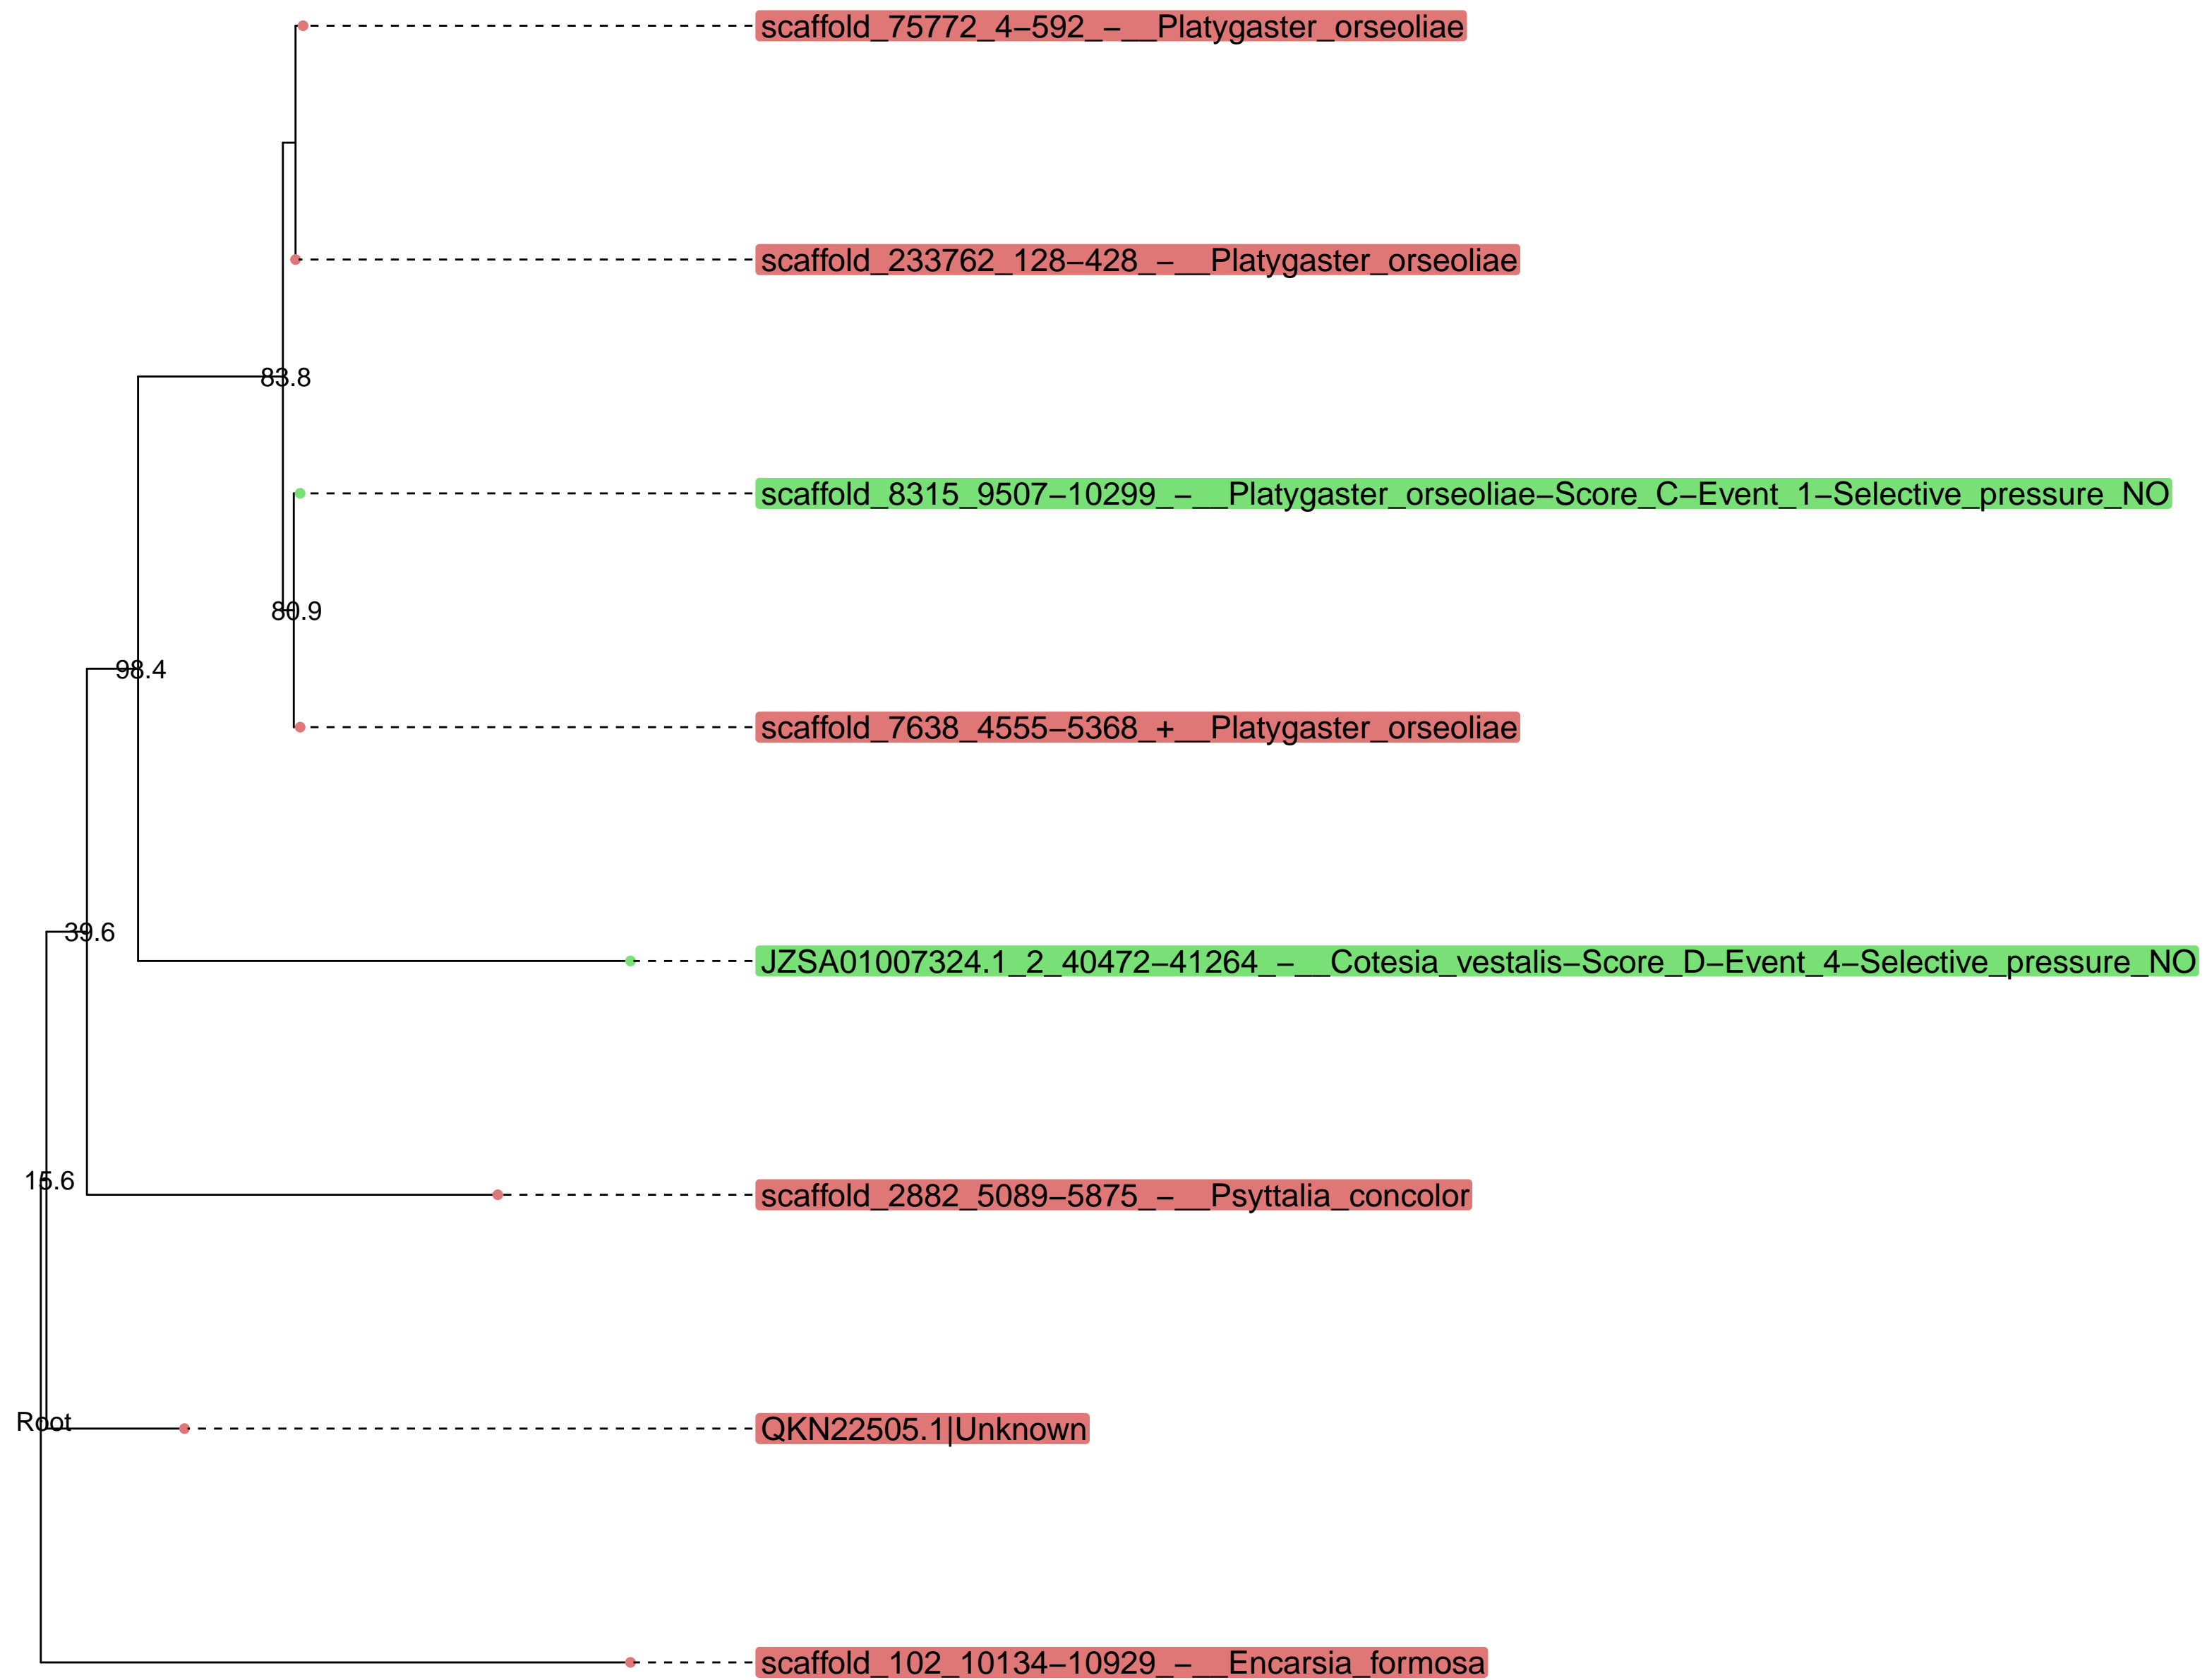

Cluster1043 – families involved : ['LbFV\_like'] – putative protein : ['Early growth response N-terminal domain']

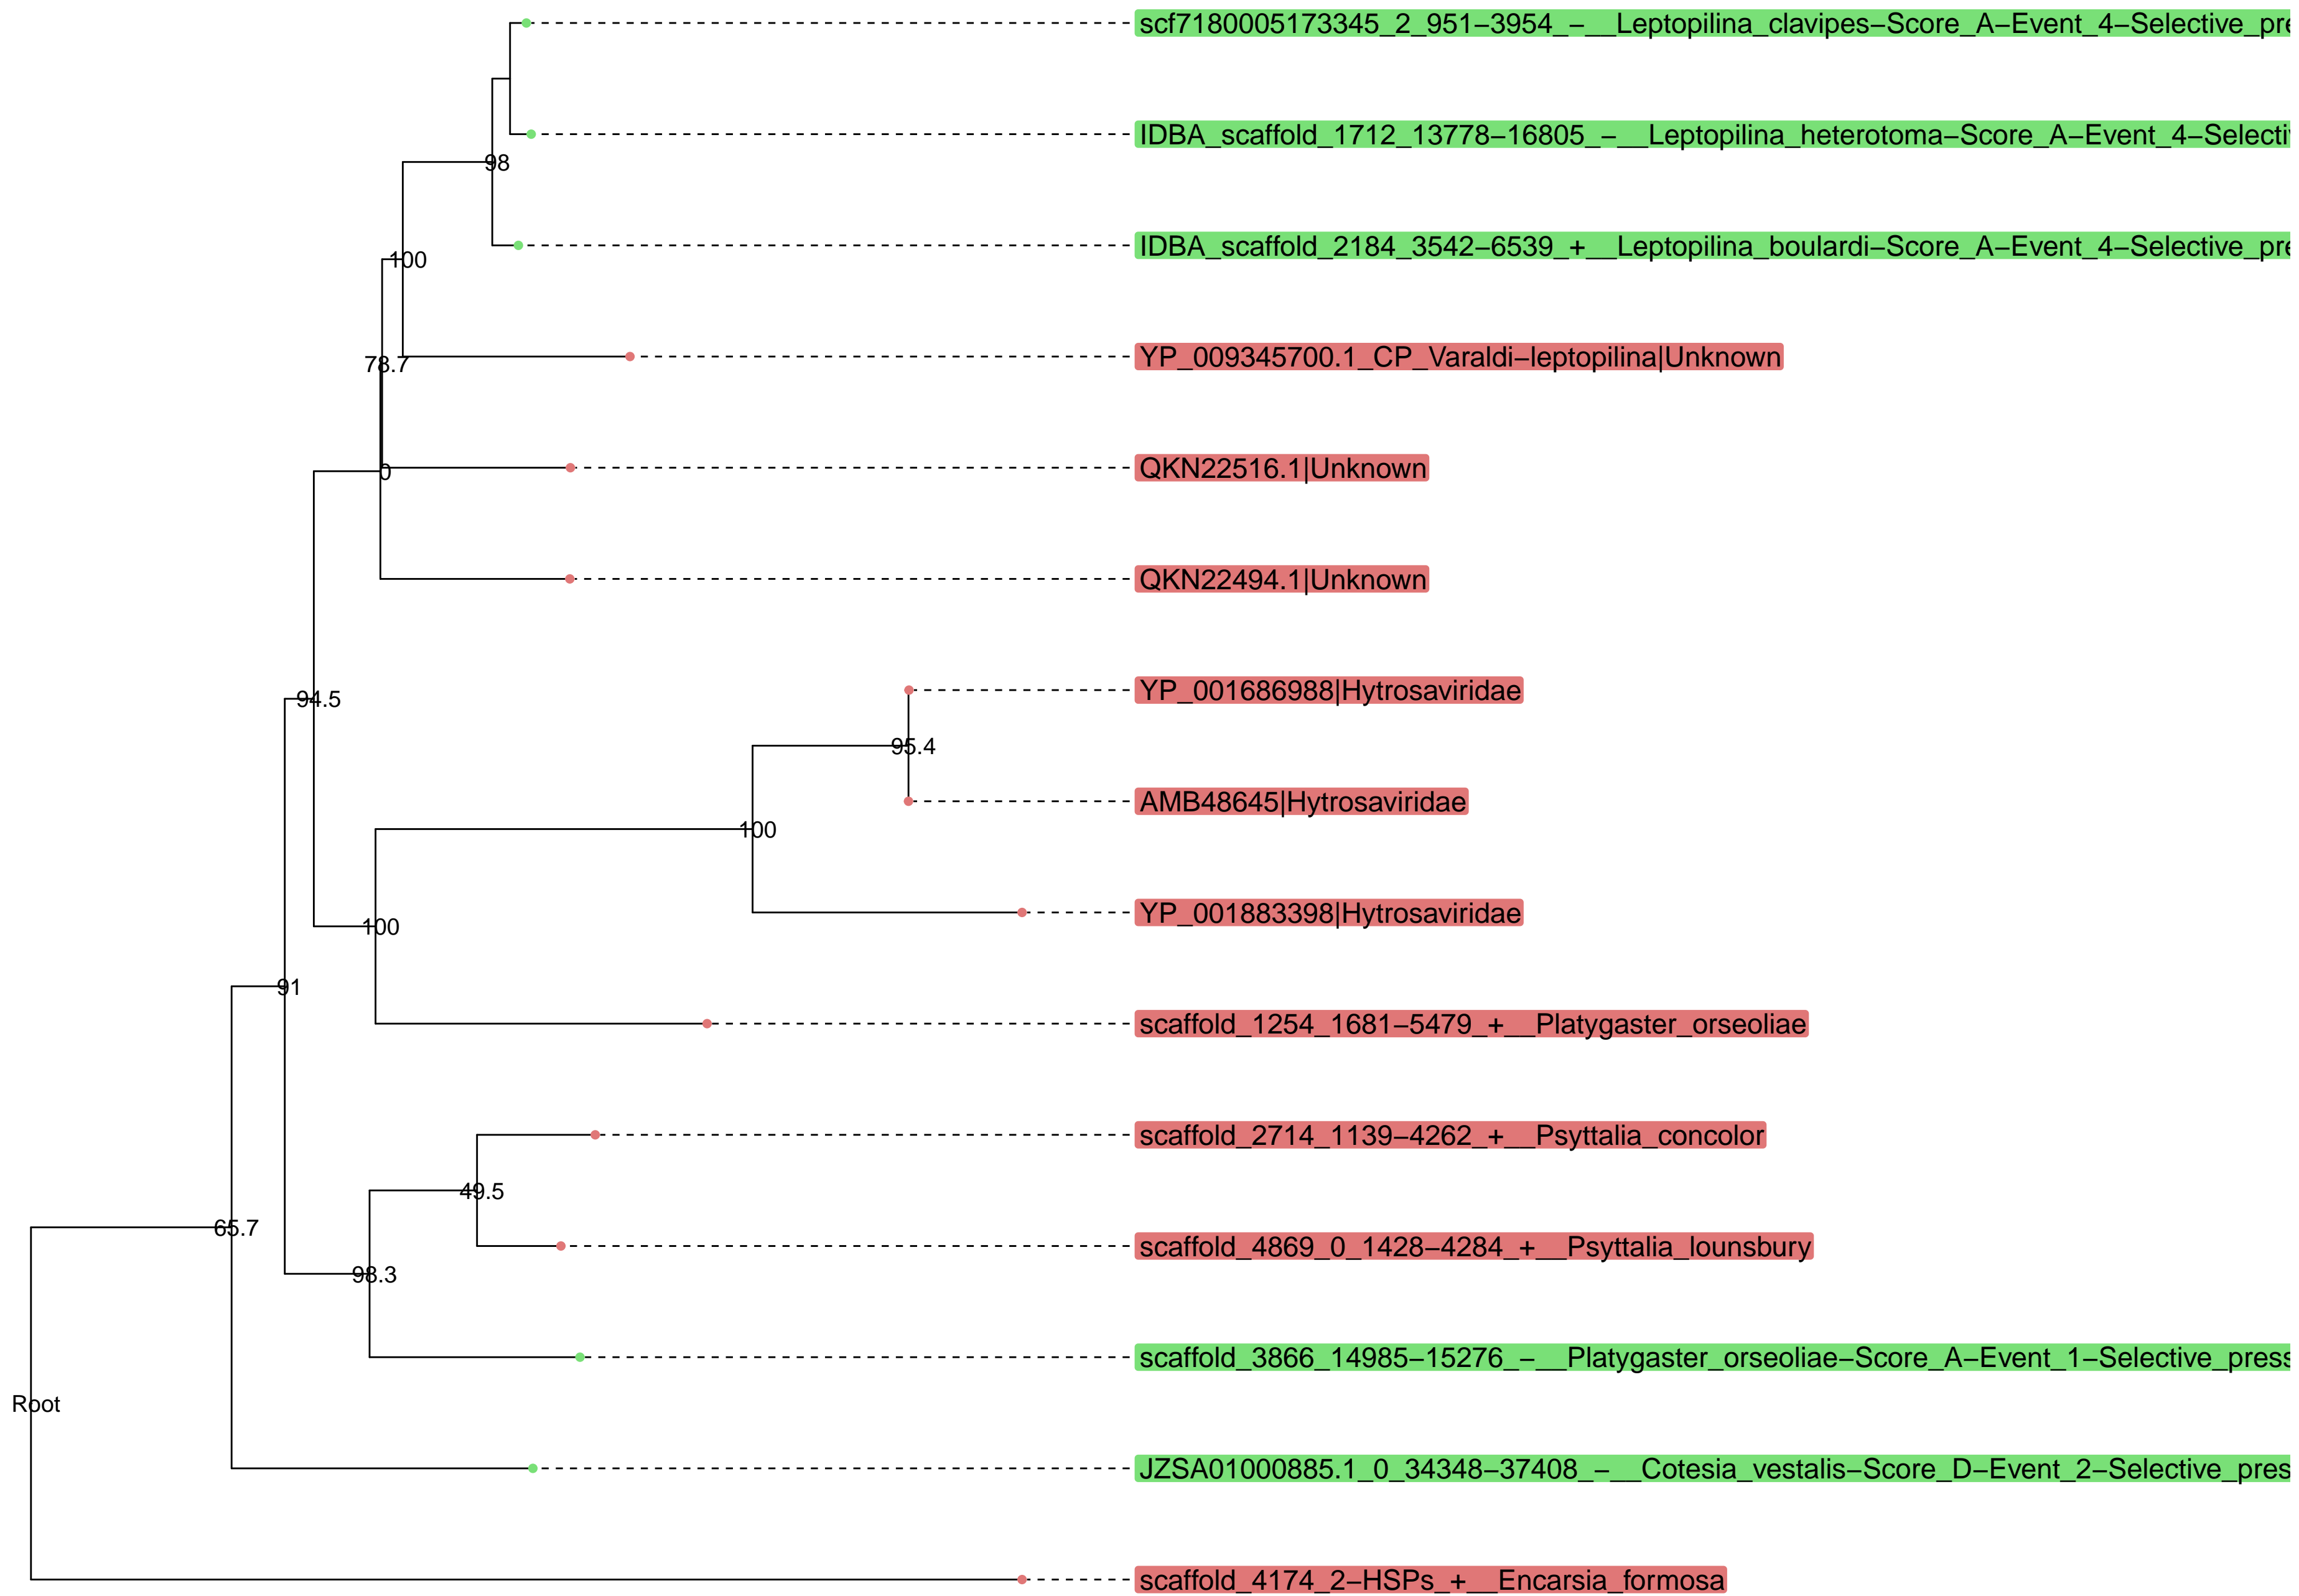

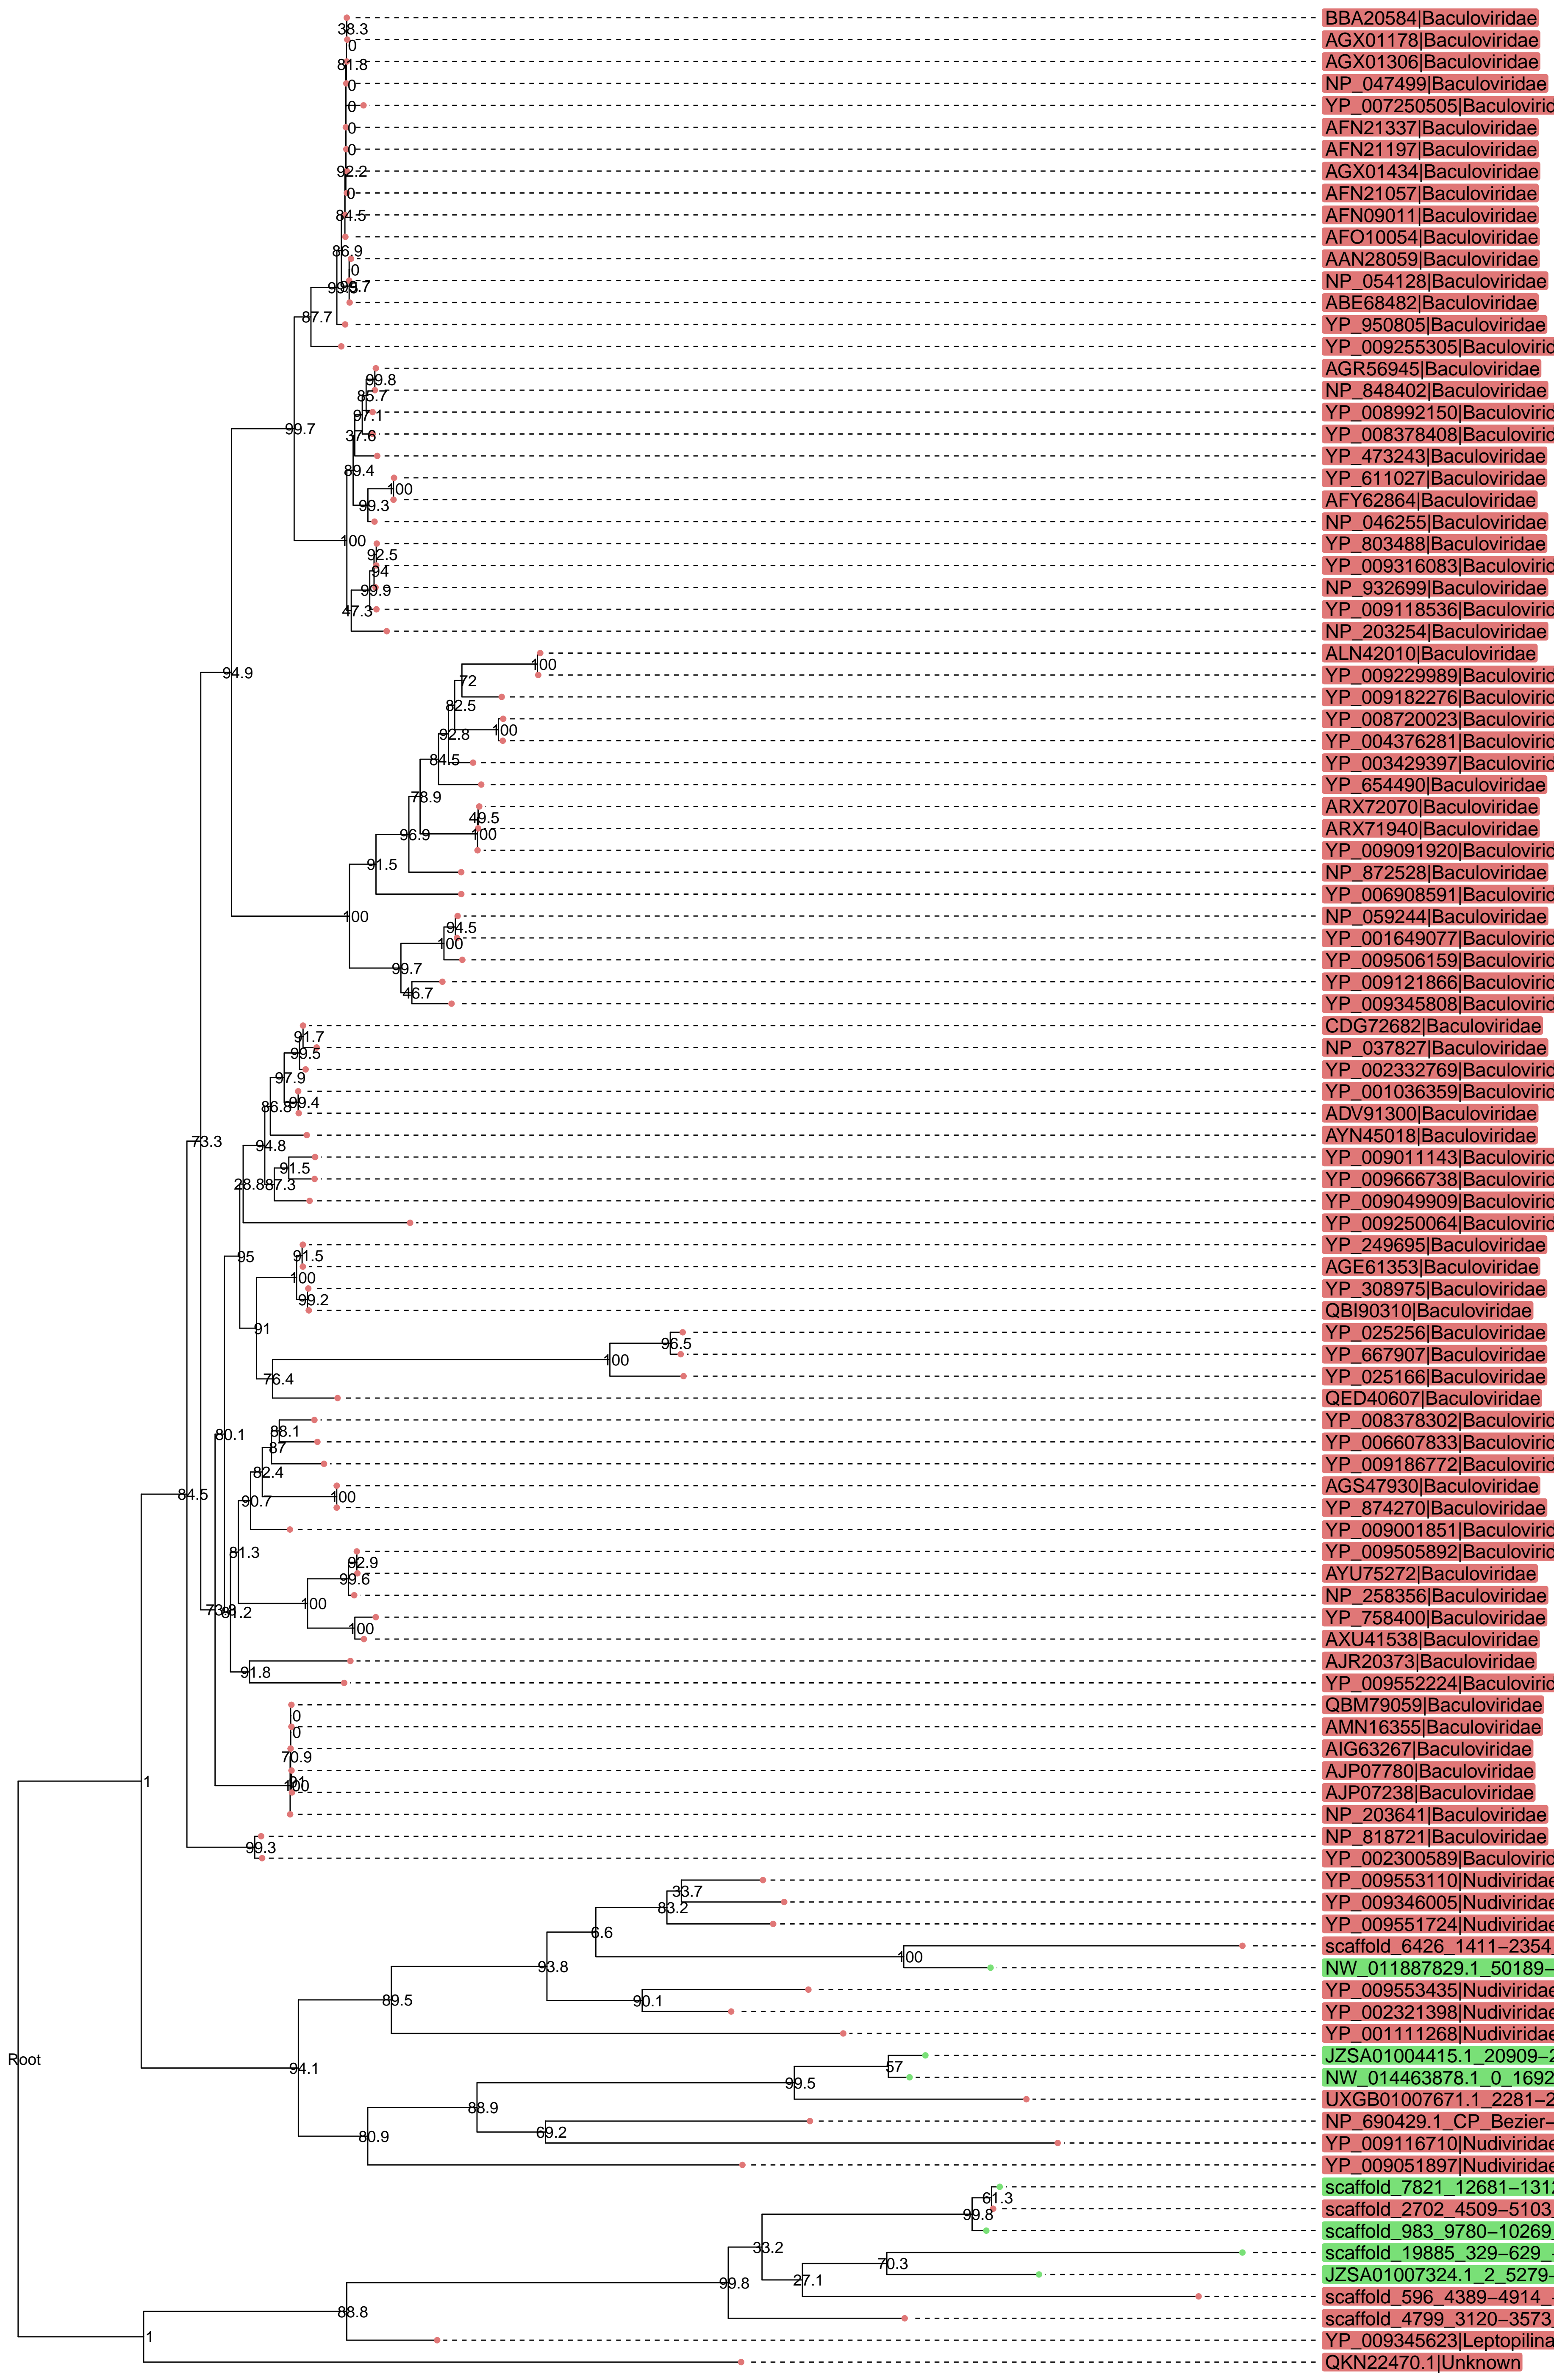



Cluster10025 – families involved : ['Baculoviridae'] – putative protein : ['Uncharacterized protein']

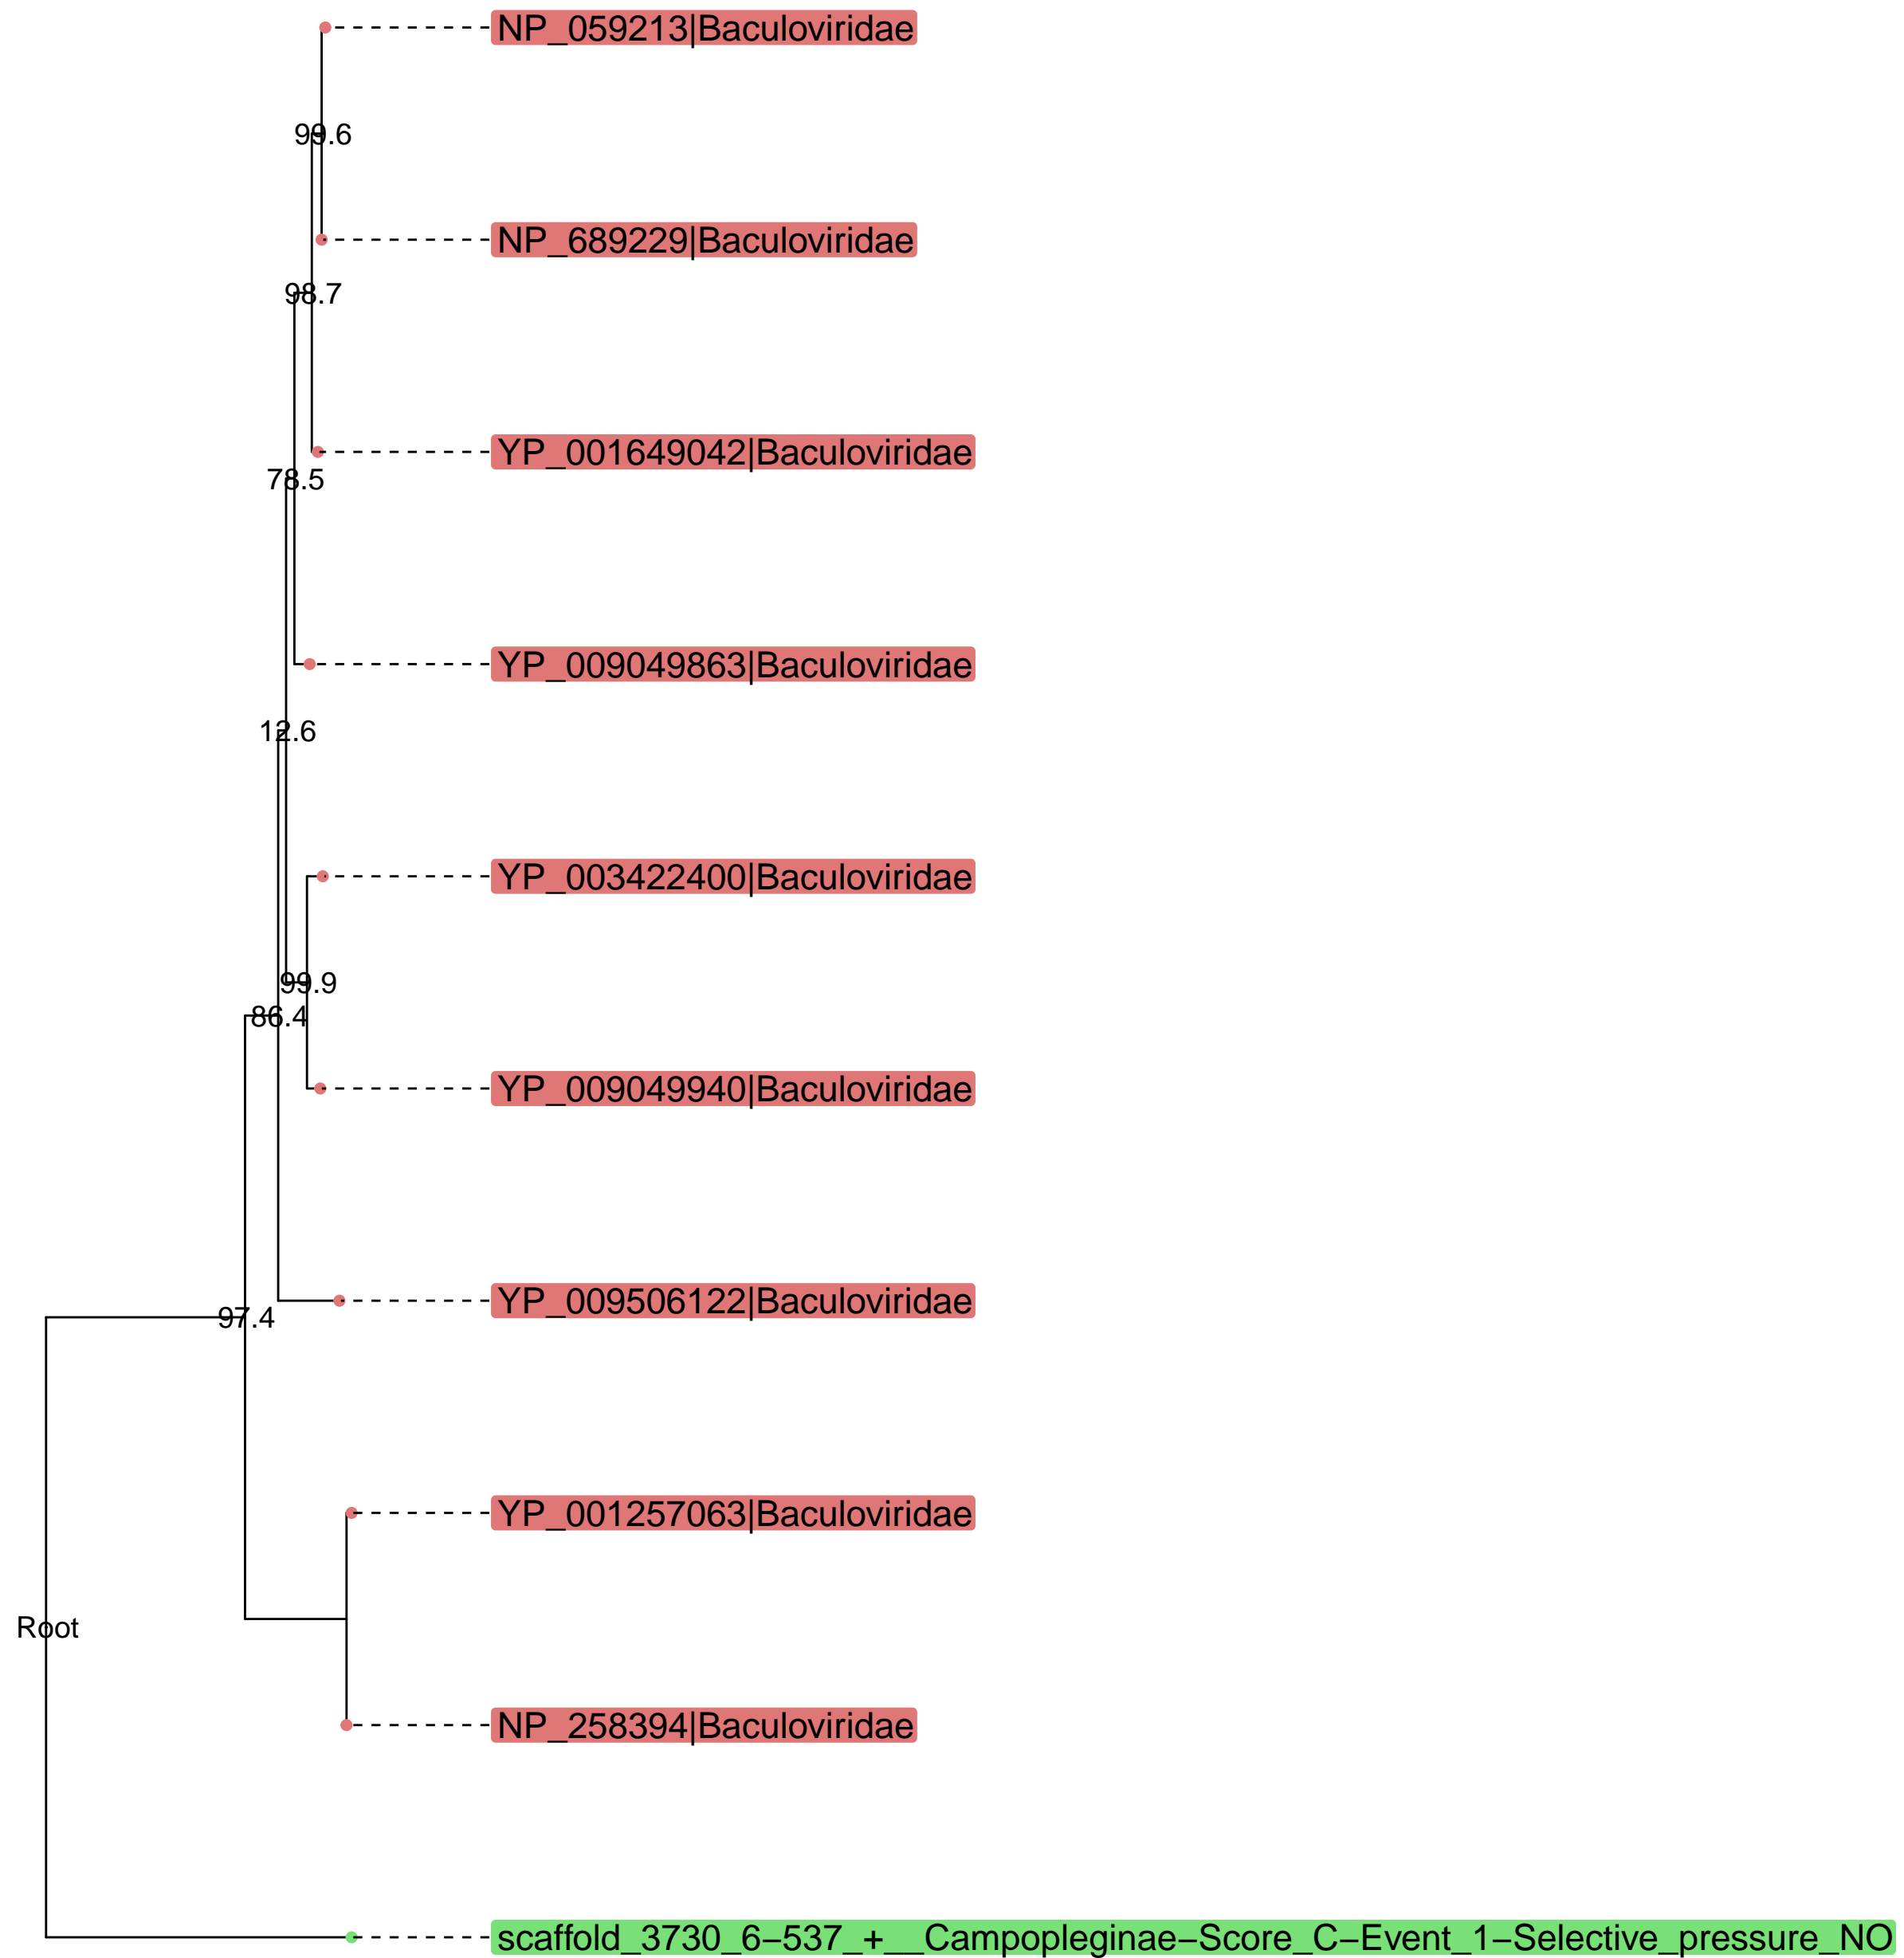

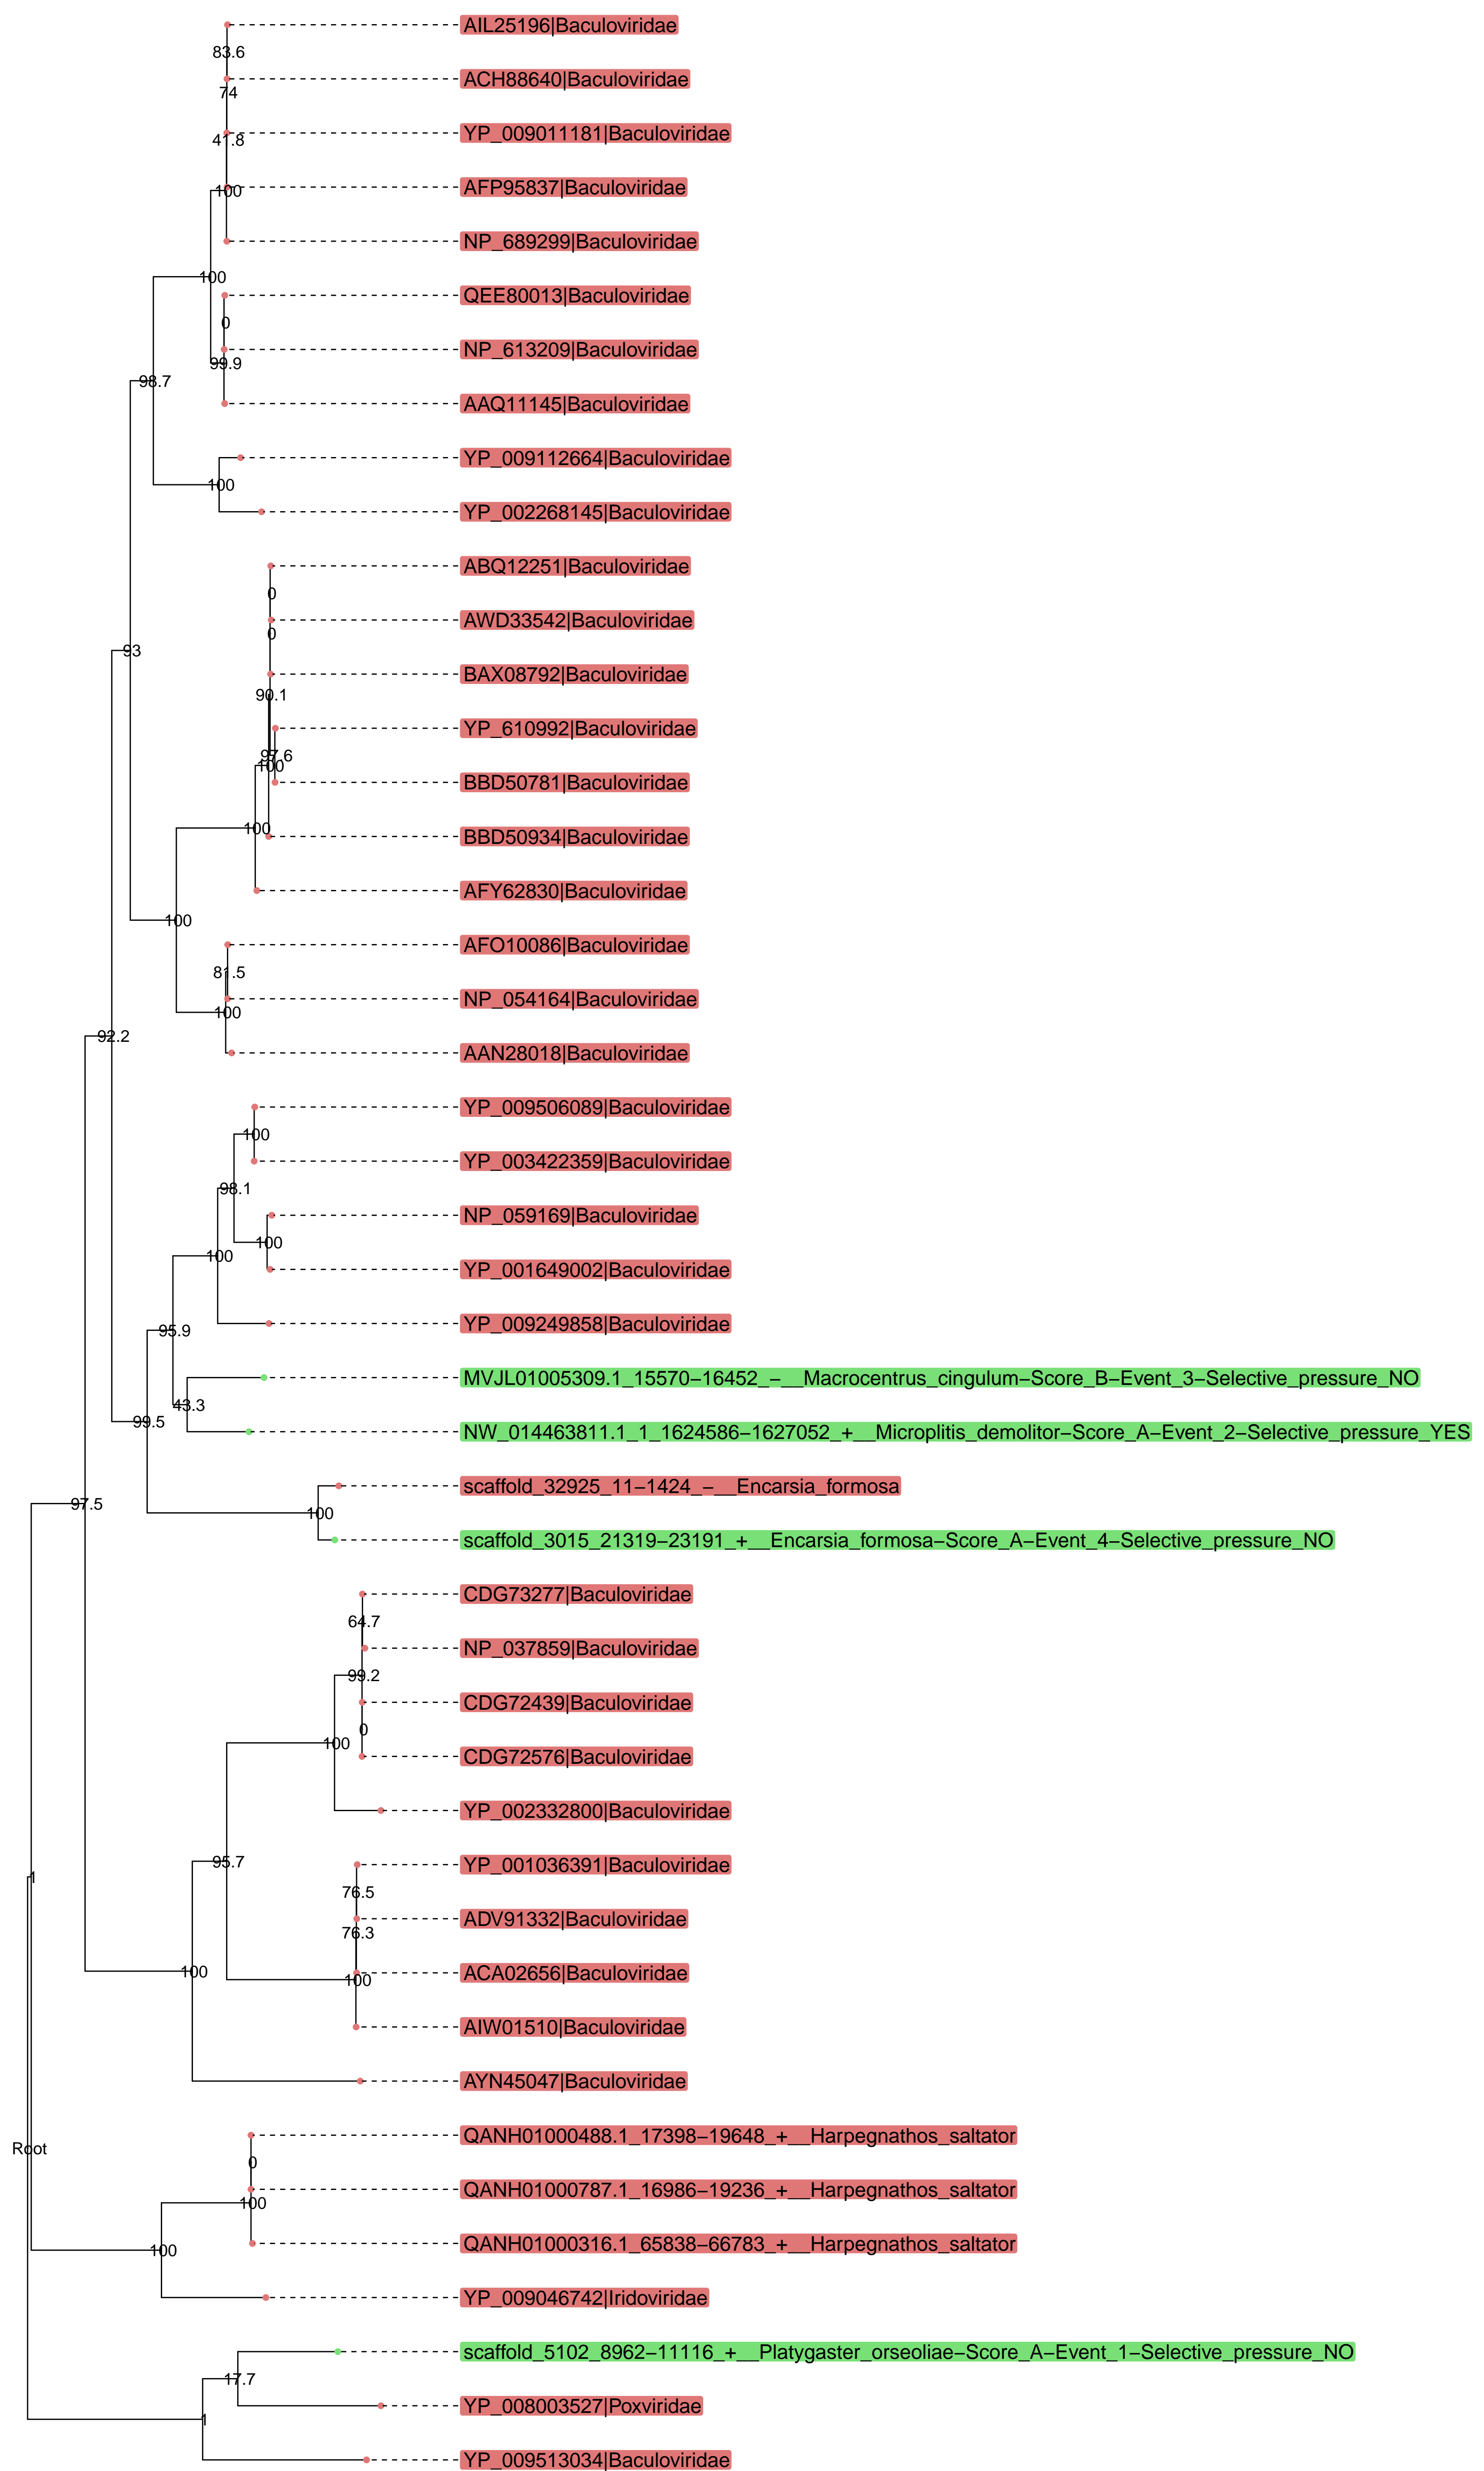

Cluster10412 – families involved : ['Baculoviridae'] – putative protein : ['Chitin-binding type-2 domain-containing protein']

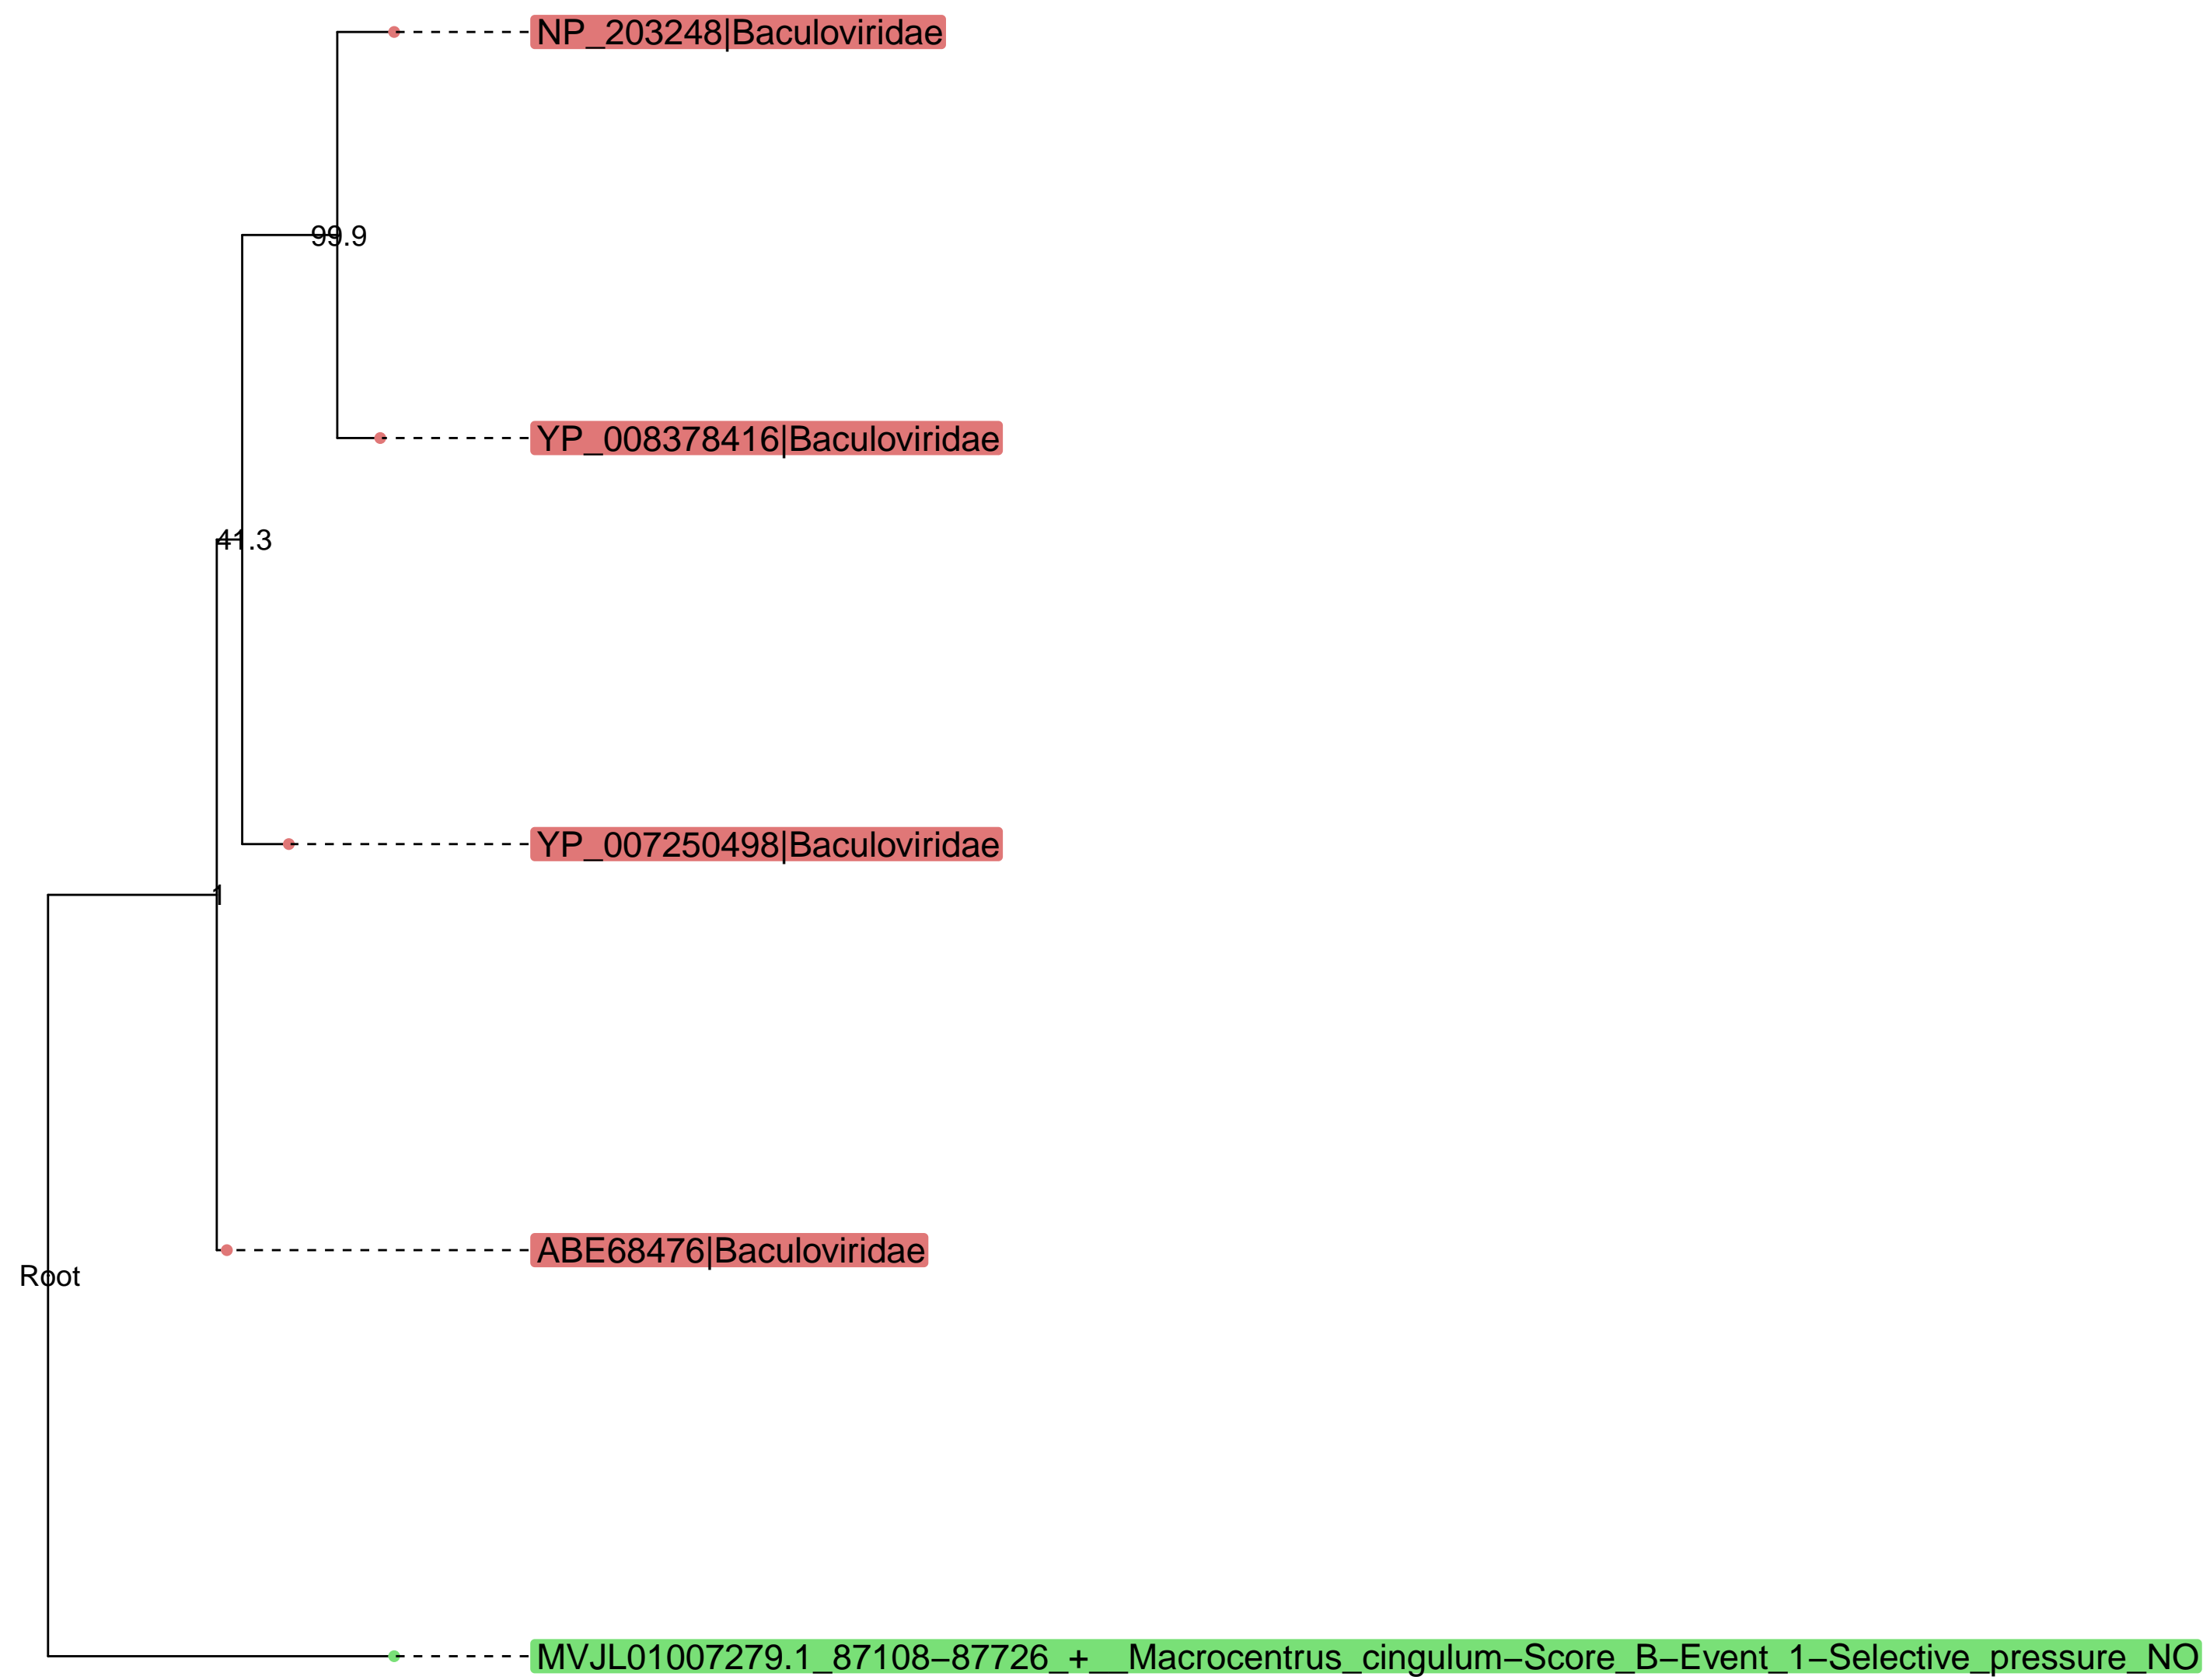

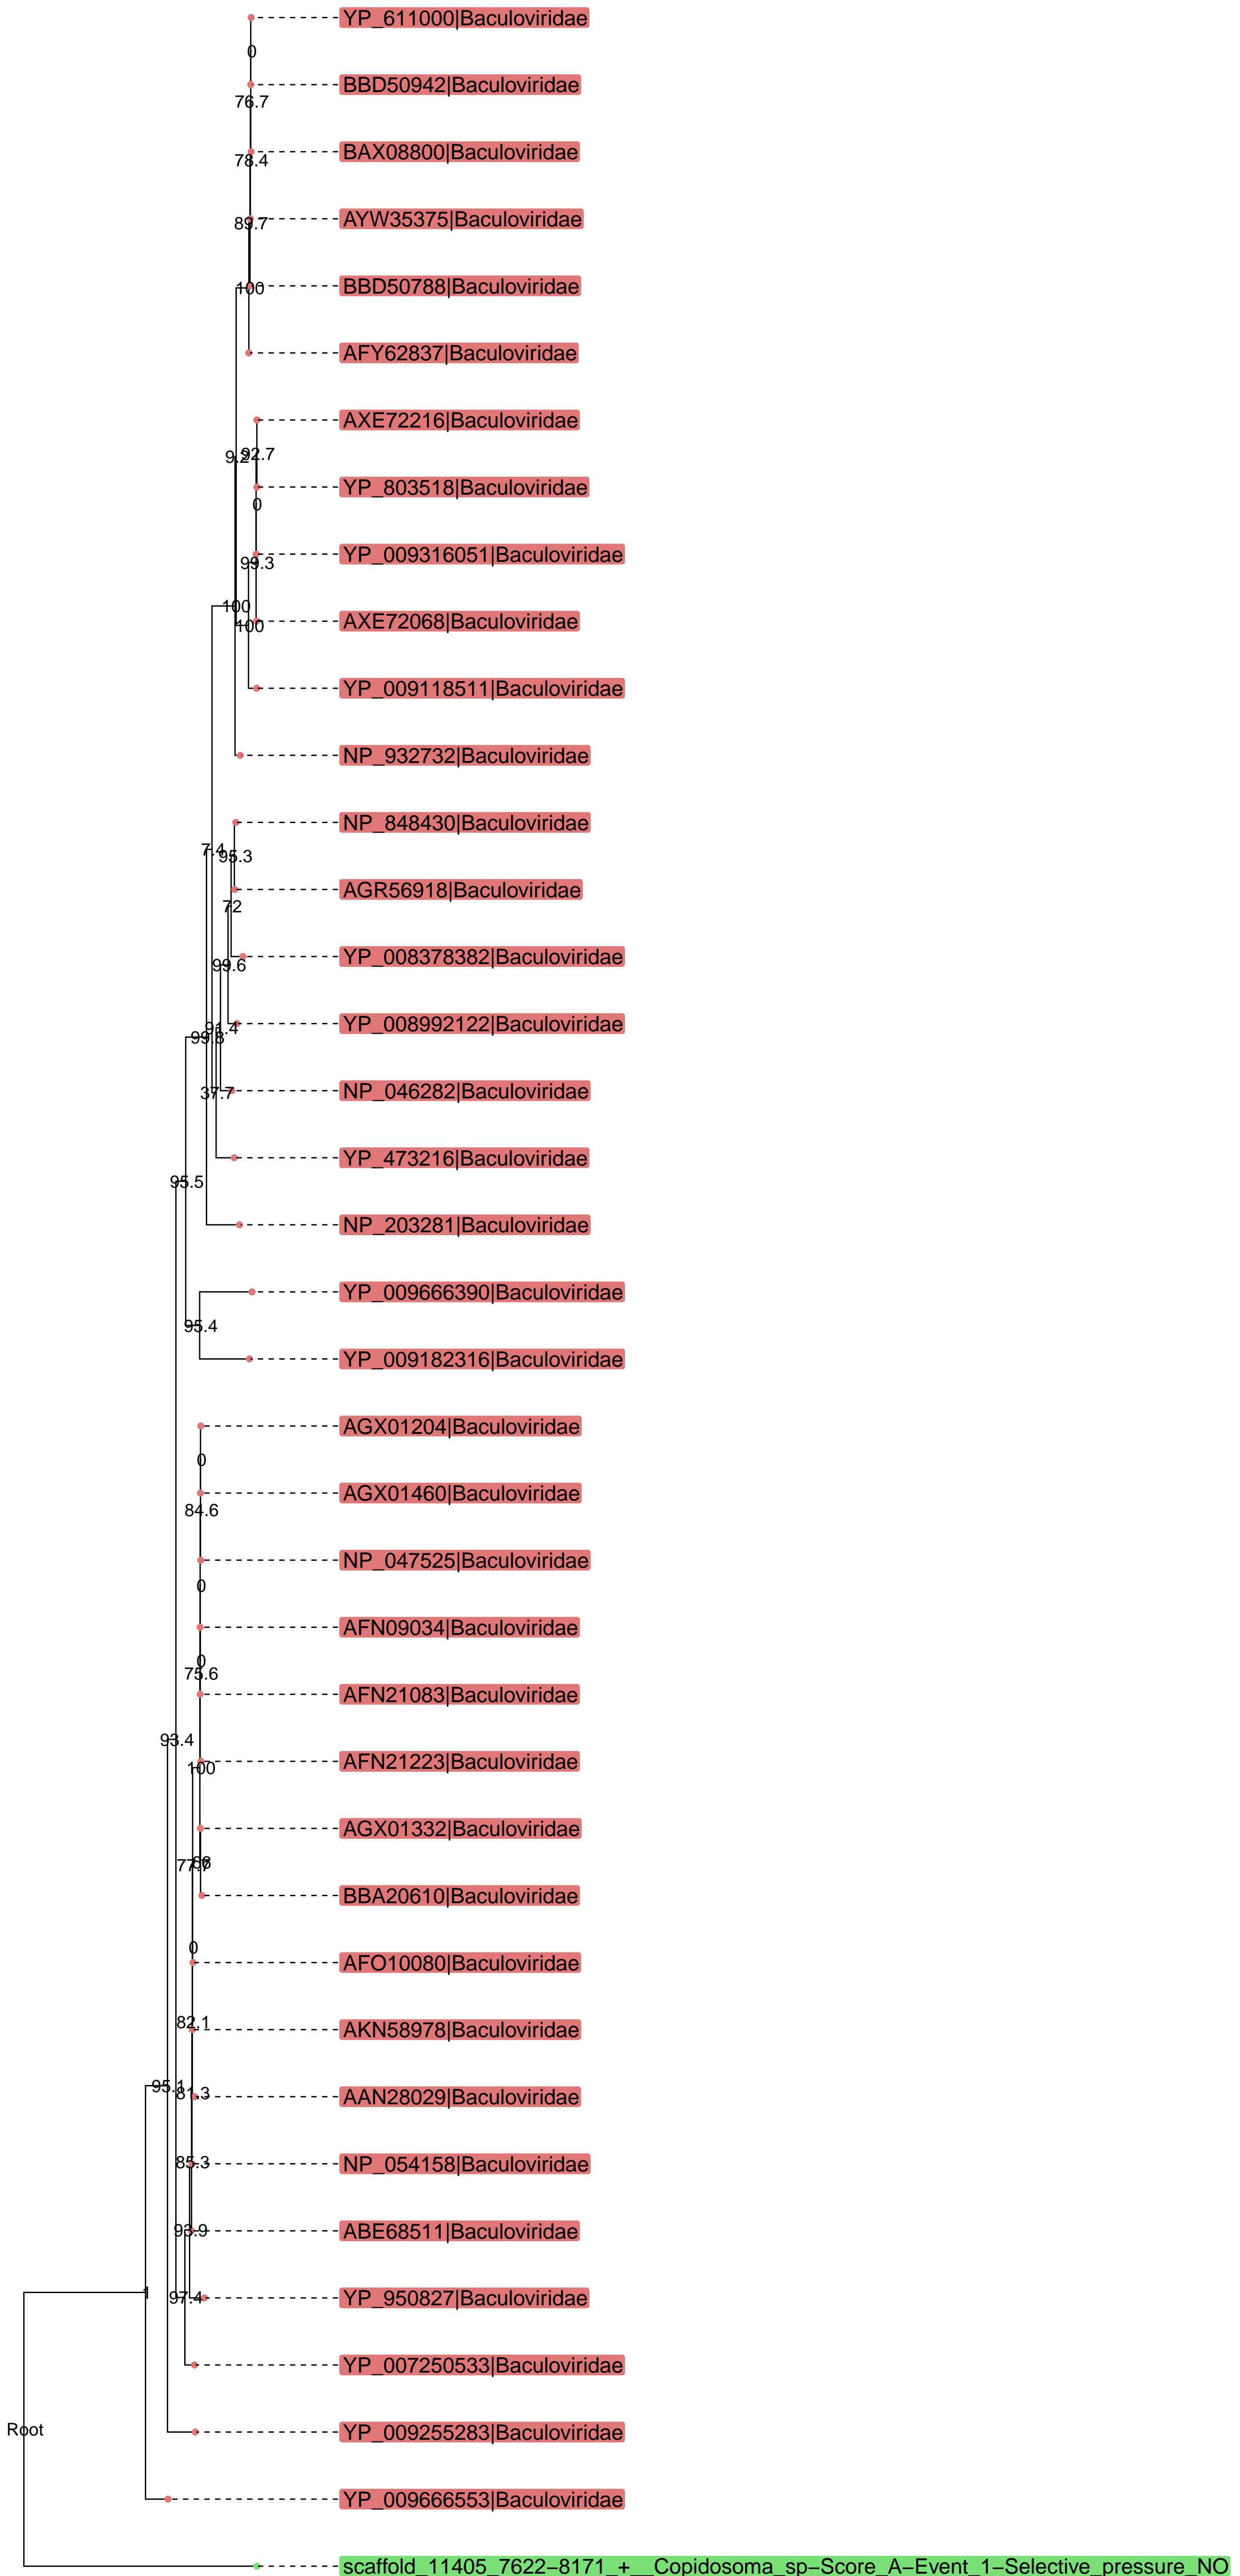

Supplement: supp12 [file elife-85993-supp12-v1.pdf]
