# Supplementary material for: Endoparasitoid lifestyle promotes endogenization and domestication of dsDNA viruses
Source: eLife. 2023 Jun 6;12:e85993. doi: 10.7554/eLife.85993 (PMC10259472; doi:10.7554/eLife.85993)
Supplement: Supplementary file 1. [file elife-85993-supp1.xlsx]

## Sheet: Summary_EVE_statistics
	dsDNA	ssDNA	dsRNA	ssRNA	Total
Clusters	166	9	18	36	229
Raw EVEs (A|B|C|D)	819 (534|61|102|122)	92 (40|27|6|19)	95 (45|19|26|5)	255 (129|74\|34|18)	1261
Complet raw EVEs ORFs (>80 % best viral hit)	694 (409)	74 (39)	76 (26)	223 (76)	1067 (550)
EVEs	366	32	61	162	621
Mean pident (sd)	36.99 (15.35)	36.91 (11.37)	38.32 (13.27)	33.30 (11.82)	36.32
EVE pidents >= 80	22	0	0	0	22
EVE E-values 1e-20	430	29	67	126	652
dEVEs	112	9	12	38	171
Events	130	26	59	152	367
shared Events	17	1	5	13	36
viral families/clades	12	3	4	21	40
dEvents	47	10	12	38	107
Clusters refers to the number of homologous clusters with one or more candidate Endogenous Viral Elements (EVEs). Raw EVEs is the raw number of EVEs (i.e. including all paralogs and orthologs) according to the scaffold categories from A to D. Number EVEs with complete ORFs corresponds to the number of raw EVEs with an ORF starting with a methionine, without premature stop codons, and ending with …
