# Supplementary material for: Endoparasitoid lifestyle promotes endogenization and domestication of dsDNA viruses
Source: eLife. 2023 Jun 6;12:e85993. doi: 10.7554/eLife.85993 (PMC10259472; doi:10.7554/eLife.85993)
Supplement: Supplementary file 2. [file elife-85993-supp2.xlsx]

## Sheet: Assembly_information
Species name	Family	SubFamily	SuperFamily	Order	lifestyle1	ref-lifestyle1	lifestyle2	ref-lifestyle2	Source	Acc_number	Complet	Duplicated	Fragmented	Missing	Total	length	GC(%)	N50	Assembly_coverage
Venturia canescens	Ichneumonidae	Campopleginae	Ichneumonoidea	Hymenoptera	endo-parasitoid	MM Rahman et al 2007 (Doi:10.1016/j.jinsphys.2007.01.007)	endo-parasitoid		BIPPA	Venturia canescens genome v1.0	4117	18	185	113	4415	227772020	40.09	121512	6
Leptopilina heterotoma	Figitidae	Figitinae	Cynipoidea	Hymenoptera	endo-parasitoid	Eric Wajnber et al 1990 (Archives insect Biochemistryand Physiology 13:239-245 (1990))	endo-parasitoid		NCBI	GCA_010016045.1	3777	19	340	298	4415	388107436	26.18	15606	52
Leptopilina clavipes	Figitidae	Figitinae	Cynipoidea	Hymenoptera	endo-parasitoid	Eric Wajnber et al 1990 (Archives insect Biochemistryand Physiology 13:239-245 (1990))	endo-parasitoid		NCBI	GCA_001855655.1	3750	23	330	335	4415	255946671	29.67	17720	86
Leptopilina boulardi	Figitidae	Figitinae	Cynipoidea	Hymenoptera	endo-parasitoid	Eric Wajnber et al 1990 (Archives insect Biochemistryand Physiology 13:239-245 (1990))	endo-parasitoid		NCBI	GCA_003121605.1	3948	19	233	234	4415	274972964	27.52	16661	45
Synergus umbraculus	Cynipidae	Cynipinae	Cynipoidea	Hymenoptera	free-living	Péter Bihari et al 2011 (Doi:10.1111/j.1095-8312.2010.01609.x)	free-living		NCBI	GCA_900474325.1	3995	43	236	187	4415	234689381	33.22	49612	93
Synergus japonicus	Cynipidae	Cynipinae	Cynipoidea	Hymenoptera	free-living	J. Pujade-Villar et al 2017 (Doi:10.11646/zootaxa.4341.1.4)	free-living		NCBI	GCA_900474275.1	4022	51	215	180	4415	226142052	33.11	61592	132
Torymus geranii	Torymidae	Toryminae	Chalcidoidea	Hymenoptera	ecto-parasitoid	Chul-Su Kim et al 2005 (ISSN : 1225-1305)	ecto-parasitoid		NCBI	GCA_900474355.1	2800	25	1015	601	4415	357140807	38.18	5133	53
Atta texana	Formicidae	Myrmicinae	Formicoidea	Hymenoptera	free-living	Moser & Blum, 1963 (Doi: 10.1126/science.140.3572.1228.a)	eusocial	Ralph S. Peters et al 2017 (Doi:10.1016/j.cub.2017.01.027)	NCBI	GCA_004480015.1	3500	13	700	215	4415	285512682	32.75	10824	3
Cataglyphis hispanica	Formicidae	Formicinae	formicoidea	Hymenoptera	free-living	Leniaud L et al 2012 (Doi: 10.1016/j.cub.2012.04.060)	eusocial	Ralph S. Peters et al 2017 (Doi:10.1016/j.cub.2017.01.027)	NCBI	GCA_004195275.1	3487	16	688	240	4415	196868387	34.92	13224	32
Torymus auratus	Torymidae	Toryminae	Chalcidoidea	Hymenoptera	ecto-parasitoid	https://www.nhm.ac.uk/our-science/data/chalcidoids/torymidae.html	ecto-parasitoid		NCBI	GCA_900474315.1	3627	47	504	288	4415	392945844	37.86	10935	31
Cecidostiba semifascia	Pteromalidae	Pteromalinae	Chalcidoidea	Hymenoptera	ecto-parasitoid	Personal communication from Stone Graham	ecto-parasitoid		NCBI	GCA_900474235.1	3723	30	435	259	4415	268891058	39.87	7059	29
Solenopsis fugax	Formicidae	Myrmicinae	Formicoidea	Hymenoptera	free-living	Ralph S. Peters et al 2017 (Doi: 10.1016/j.cub.2017.01.027) & The book chapter by Xim Cerdá and Alain DejeanAlain Dejean: Predation in the Hymenoptera: An Evolutionary PerspectiveChapter: chapter 3Publisher: TransWorld Research Network, Kerala, India & Arthur Weyna and Jonathan Romiguier (2021) (Doi: 10.24072/pci.evolbiol.100120)	eusocial	Ralph S. Peters et al 2017 (Doi:10.1016/j.cub.2017.01.027)	NCBI	GCA_003595255.1	3796	11	421	199	4415	326213504	35.79	14987	30*
Cotesia vestalis	Braconidae	Microgastrinae	Ichneumonoidea	Hymenoptera	endo-parasitoid	Shi, M. et al 2015 (Doi:10.1038/srep08173)	endo-parasitoid		NCBI	GCA_000956155.1	3593	184	401	426	4415	186076190	30.58	46055	118
Lasius niger	Formicidae	Formicinae	Formicoidea	Hymenoptera	free-living	Ralph S. Peters et al 2017 (Doi: 10.1016/j.cub.2017.01.027) & The book chapter by Xim Cerdá and Alain DejeanAlain Dejean: Predation in the Hymenoptera: An Evolutionary PerspectiveChapter: chapter 3Publisher: TransWorld Research Network, Kerala, India & Arthur Weyna and Jonathan Romiguier (2021) (Doi: 10.24072/pci.evolbiol.100120)	eusocial	Ralph S. Peters et al 2017 (Doi:10.1016/j.cub.2017.01.027)	NCBI	GCA_001045655.1	3893	30	391	131	4415	236236391	37.08	17057	103
Megastigmus stigmatizans	Megastigmidae	Megastigminae	Chalcidoidea	Hymenoptera	endo-parasitoid	Personal communication from Stone Graham	endo-parasitoid		NCBI	GCA_900490015.1	3853	62	385	183	4415	567086610	37.33	9480	29
Eupelmus urozonus	Eupelmidae	Eupelminae	Chalcidoidea	Hymenoptera	ecto-parasitoid	Al khatib et al. 2016 (Doi:10.1186/s12862-015-0571-2)	ecto-parasitoid		NCBI	GCA_900480035.1	3853	37	378	185	4415	355431657	36.08	21852	21
Eurytoma brunniventris	Eupelmidae	Eurytominae	Chalcidoidea	Hymenoptera	ecto-parasitoid	Gómez J.F et al 2011 (Doi:10.5252/z2011n3a3)	ecto-parasitoid		NCBI	GCA_900475205.1	3800	35	377	239	4415	306298026	39.52	15700	28
Lepidotrigona ventralis	Apidae	Meliponinae	Apoidea	Hymenoptera	free-living	de Paula Freitas, et al 2020 (Doi:10.1186/s12864-020-06784-8)	eusocial	Tong X. Chinh et al 2005 (Doi:10.1051/apido:2005035)	NCBI	GCA_002806875.1	3883	16	374	158	4415	333075982	36.36	6644	447*
Eupelmus annulatus	Eupelmidae	Eupelminae	Chalcidoidea	Hymenoptera	ecto-parasitoid	Al khatib et al. 2016 (Doi:10.1186/s12862-015-0571-2)	ecto-parasitoid		NCBI	GCA_900480025.1	3865	29	353	197	4415	313379466	36.77	28792	21
Cataglyphis niger	Formicidae	Formicinae	Formicoidea	Hymenoptera	free-living	Ralph S. Peters et al 2017 (Doi: 10.1016/j.cub.2017.01.027) & The book chapter by Xim Cerdá and Alain DejeanAlain Dejean: Predation in the Hymenoptera: An Evolutionary PerspectiveChapter: chapter 3Publisher: TransWorld Research Network, Kerala, India & Arthur Weyna and Jonathan Romiguier (2021) (Doi: 10.24072/pci.evolbiol.100120)	eusocial	Ralph S. Peters et al 2017 (Doi:10.1016/j.cub.2017.01.027)	NCBI	GCA_004329405.1	3958	27	350	109	4415	259431754	36.02	21914	174
Ormyrus nitidulus	Chalcidoidea	Ormyrinae	Chalcidoidea	Hymenoptera	ecto-parasitoid	José F. Goméz et al 2017 (Doi:10.3897/zookeys.644.10035)	ecto-parasitoid		NCBI	GCA_900474335.1	3870	38	343	204	4415	258483172	38.79	23183	35
Eurytoma adleriae	Eupelmidae	Eurytominae	Chalcidoidea	Hymenoptera	ecto-parasitoid	Gómez J.F et al 2011 (Doi:10.5252/z2011n3a3)	ecto-parasitoid		NCBI	GCA_900480045.1	3937	32	310	169	4415	294798487	39.25	52520	58
Anoplophora glabripennis	Cerambycidae	Lamiinae	Coleoptera	Hymenoptera	free-living		free-living		NCBI	GCF_000390285.2	2816	77	291	1312	4415	706968555	32.84	678234	121
Ormyrus pomaceus	Chalcidoidea	Ormyrinae	Chalcidoidea	Hymenoptera	ecto-parasitoid	José F. Goméz et al 2017 (Doi:10.3897/zookeys.644.10035)	ecto-parasitoid		NCBI	GCA_900474385.1	3988	39	283	148	4415	260009724	38.96	32301	170
Apis florea	Apidae	Apinae	Apoidea	Hymenoptera	free-living	Ralph S. Peters et al 2017 (Doi: 10.1016/j.cub.2017.01.027) AND A.Weyna and J.Romiguier (2021) (Doi: 10.24072/pci.evolbiol.100120)	eusocial	Ralph S. Peters et al 2017 (Doi:10.1016/j.cub.2017.01.027)	NCBI	GCF_000184785.3	4101	6	266	48	4415	230485475	33.77	2863240	2
Megastigmus dorsalis	Megastigmidae	Megastigminae	Chalcidoidea	Hymenoptera	ecto-parasitoid	Personal communication from Stone Graham	ecto-parasitoid		NCBI	GCA_900490025.1	4029	81	245	150	4415	576973147	37.2	19725	82*
Neodiprion pinetum	Diprionidae	Diprioninae	Tenthredinoidea	Hymenoptera	free-living	Aunu Rauf et al. 1980 (Great Lakes Entomologist 13(4):219-224)	free-living		NCBI	GCA_004916985.1	4064	25	223	129	4415	269775091	39.72	609994	50*
Trichomalopsis sarcophagae	Pteromalidae	Pteromalinae	Chalcidoidea	Hymenoptera	ecto-parasitoid	Claire Garros et al 2018 (ISBN:9086868630, 9789086868636)	ecto-parasitoid		NCBI	GCA_002249905.1	4093	40	221	104	4415	233049391	41.65	22913	74
Macrocentrus cingulum	Braconidae	Macrocentrinae	Ichneumonoidea	Hymenoptera	endo-parasitoid	Jian Hu et al 2003 (Doi:10.1016/s0022-1910(03)00021-0)	endo-parasitoid		NCBI	GCA_002156465.1	4034	48	214	170	4415	126835265	35.62	65830	750*
Ceratosolen solmsi	Agaonidae	Kradibiinae	Chalcidoidea	Hymenoptera	free-living	Ling-Yi Jia et al 2014 (Doi:0.1017/S0007485313000606)	free-living		NCBI	GCF_000503995.1	4069	16	209	138	4415	276755588	30.35	10507856	116
Nasonia longicornis	Pteromalidae	Pteromalinae	Chalcidoidea	Hymenoptera	ecto-parasitoid	MM Mair et al 2019 (Doi:10.3389/fevo.2019.00184)	ecto-parasitoid		NCBI	GCA_000004795.1	4090	32	208	119	4415	285553214	42.73	758407	13
Nasonia giraulti	Pteromalidae	Pteromalinae	Chalcidoidea	Hymenoptera	ecto-parasitoid	Phd Edward Mathison Sykes	ecto-parasitoid		NCBI	GCA_000004775.1	4094	30	207	114	4415	283452533	42.87	759431	677
Pogonomyrmex barbatus	Formicidae	Myrmicinae	Formicoidea	Hymenoptera	free-living	Ralph S. Peters et al 2017 (Doi: 10.1016/j.cub.2017.01.027) & The book chapter by Xim Cerdá and Alain DejeanAlain Dejean: Predation in the Hymenoptera: An Evolutionary PerspectiveChapter: chapter 3Publisher: TransWorld Research Network, Kerala, India & Arthur Weyna and Jonathan Romiguier (2021) (Doi: 10.24072/pci.evolbiol.100120)	eusocial	Ralph S. Peters et al 2017 (Doi:10.1016/j.cub.2017.01.027)	NCBI	GCF_000187915.1	4159	4	206	50	4415	235639139	36.5	819605	5
Euglossa dilemma	Apidae	Apinae	Apoidea	Hymenoptera	free-living	Ralph S. Peters et al 2017 (Doi: 10.1016/j.cub.2017.01.027) AND A.Weyna and J.Romiguier (2021) (Doi: 10.24072/pci.evolbiol.100120)	free-living		NCBI	GCA_002201625.1	4111	72	198	108	4415	588198615	39.94	143590	19.7*
Nasonia vitripennis	Pteromalidae	Pteromalinae	Chalcidoidea	Hymenoptera	ecto-parasitoid	Phd from Edward Mathison Sykes	ecto-parasitoid		NCBI	GCF_000002325.3	4112	21	194	109	4415	295778491	41.71	897131	216
Copidosoma floridanum	Encyrtidae	Encyrtinae	Chalcidoidea	Hymenoptera	endo-parasitoid	Margaret S. Smith et al 2017 (Doi:10.1093/aesa/sax056)	endo-parasitoid		NCBI	GCF_000648655.2	3976	44	193	248	4415	555044930	36.25	1037125	181
Melipona quadrifasciata	Apidae	Meliponinae	Apoidea	Hymenoptera	free-living	Ralph S. Peters et al 2017 (Doi: 10.1016/j.cub.2017.01.027) AND A.Weyna and J.Romiguier (2021) (Doi: 10.24072/pci.evolbiol.100120)	eusocial	https://i5k.nal.usda.gov/Melipona_quadrifasciata	NCBI	GCA_001276565.1	4180	5	188	47	4415	255840597	38.88	1864352	601
Ceratina australensis	Apidae	Xylocopinae	Apoidea	Hymenoptera	free-living	Ralph S. Peters et al 2017 (Doi: 10.1016/j.cub.2017.01.027) AND A.Weyna and J.Romiguier (2021) (Doi: 10.24072/pci.evolbiol.100120)	subsocial	10.1007/s00040-010-0097-y	NCBI	GCA_004307685.1	4053	207	186	184	4415	216686406	42.1	148441	107
Microplitis demolitor	Braconidae	Microgastrinae	Ichneumonoidea	Hymenoptera	endo-parasitoid	B. Merle Shepard et al 1983 (Doi:10.1093/ee/12.3.641)	endo-parasitoid		NCBI	GCF_000572035.2	4053	40	185	179	4415	241190213	30.45	1139389	366
Nylanderia fulva	Formicidae	Frrmicinae	Formicoidea	Hymenoptera	free-living	Ralph S. Peters et al 2017 (Doi: 10.1016/j.cub.2017.01.027) & The book chapter by Xim Cerdá and Alain DejeanAlain Dejean: Predation in the Hymenoptera: An Evolutionary PerspectiveChapter: chapter 3Publisher: TransWorld Research Network, Kerala, India & Arthur Weyna and Jonathan Romiguier (2021) (Doi: 10.24072/pci.evolbiol.100120)	eusocial	Ralph S. Peters et al 2017 (Doi:10.1016/j.cub.2017.01.027)	NCBI	GCF_005281655.1	4152	76	185	82	4415	375107333	35.18	443094	150*
Atta cephalotes	Formicidae	Myrmicinae	Formicoidea	Hymenoptera	free-living	Ralph S. Peters et al 2017 (Doi: 10.1016/j.cub.2017.01.027) & The book chapter by Xim Cerdá and Alain DejeanAlain Dejean: Predation in the Hymenoptera: An Evolutionary PerspectiveChapter: chapter 3Publisher: TransWorld Research Network, Kerala, India & Arthur Weyna and Jonathan Romiguier (2021) (Doi: 10.24072/pci.evolbiol.100120)	eusocial	Ralph S. Peters et al 2017 (Doi:10.1016/j.cub.2017.01.027)	NCBI	GCF_000143395.1	4177	6	177	61	4415	317671980	32.57	5154485	19
Apis cerana	Apidae	Apinae	Apoidea	Hymenoptera	free-living	Ralph S. Peters et al 2017 (Doi: 10.1016/j.cub.2017.01.027) AND A.Weyna and J.Romiguier (2021) (Doi: 10.24072/pci.evolbiol.100120)	eusocial	Ralph S. Peters et al 2017 (Doi:10.1016/j.cub.2017.01.027)	NCBI	GCF_001442555.1	4174	29	176	66	4415	228315917	33.28	1421626	95
Temnothorax longispinosus	Formicidae	Myrmicinae	Formicoidea	Hymenoptera	free-living	Ralph S. Peters et al 2017 (Doi: 10.1016/j.cub.2017.01.027) & The book chapter by Xim Cerdá and Alain DejeanAlain Dejean: Predation in the Hymenoptera: An Evolutionary PerspectiveChapter: chapter 3Publisher: TransWorld Research Network, Kerala, India & Arthur Weyna and Jonathan Romiguier (2021) (Doi: 10.24072/pci.evolbiol.100120)	eusocial	Ralph S. Peters et al 2017 (Doi:10.1016/j.cub.2017.01.027)	NCBI	GCA_004794745.1	4174	24	173	68	4415	260681563	38.78	514432	810
Diachasma alloeum	Braconidae	Opiinae	Ichneumonoidea	Hymenoptera	endo-parasitoid	Glen R. Hood et al 2015 (Doi : 10.1073/pnas.1424717112)	endo-parasitoid		NCBI	GCF_001412515.2	4127	25	157	131	4415	388752668	38.45	645483	500
Temnothorax curvispinosus	Formicidae	Myrmicinae	Formicoidea	Hymenoptera	free-living	Ralph S. Peters et al 2017 (Doi: 10.1016/j.cub.2017.01.027) & The book chapter by Xim Cerdá and Alain DejeanAlain Dejean: Predation in the Hymenoptera: An Evolutionary PerspectiveChapter: chapter 3Publisher: TransWorld Research Network, Kerala, India & Arthur Weyna and Jonathan Romiguier (2021) (Doi: 10.24072/pci.evolbiol.100120)	eusocial	Ralph S. Peters et al 2017 (Doi:10.1016/j.cub.2017.01.027)	NCBI	GCF_003070985.1	4122	261	156	139	4415	303539295	39.01	223562	41*
Fopius arisanus	Braconidae	Opiinae	Ichneumonoidea	Hymenoptera	endo-parasitoid	Pascal rousse Phd	endo-parasitoid		NCBI	GCF_000806365.1	4154	6	146	115	4415	153631861	38.6	978588	153
Goniozus legneri	Bethylidae	Bethylinae	Chrysidoidea	Hymenoptera	ecto-parasitoid	http://www.faculty.ucr.edu/~legneref/biotact/ch-77.htm	ecto-parasitoid		NCBI	GCA_003055095.1	4197	17	144	74	4415	139129501	40.66	171790	160
Ceratina calcarata	Apidae	Xylocopinae	Apoidea	Hymenoptera	free-living	Ralph S. Peters et al 2017 (Doi: 10.1016/j.cub.2017.01.027) AND A.Weyna and J.Romiguier (2021) (Doi: 10.24072/pci.evolbiol.100120)	subsocial	SM Reham et al 2010 (Doi:10.4039/n09-056)	NCBI	GCF_001652005.1	4168	47	141	107	4415	188628874	41.24	679196	55
Cecidostiba fungosa	Pteromalidae	Pteromalinae	Chalcidoidea	Hymenoptera	ecto-parasitoid	H. Vårdal et al 2016 (doi:10.3989/graellsia.2016.v72.165)	ecto-parasitoid		NCBI	GCA_900474305.1	4080	38	136	201	4415	184211771	40.19	88168	245
Neodiprion lecontei	Diprionidae	Diprioninae	Tenthredinoidea	Hymenoptera	free-living	https://entnemdept.ufl.edu/creatures/trees/sawfly/redheaded_pine_sawfly.htm	free-living		NCBI	GCA_001263575.2	4212	24	133	70	4415	239776993	39.59	28536692	173
Habropoda laboriosa	Apidae	Apinae	Apoidea	Hymenoptera	free-living	Ralph S. Peters et al 2017 (Doi: 10.1016/j.cub.2017.01.027) AND A.Weyna and J.Romiguier (2021) (Doi: 10.24072/pci.evolbiol.100120)	free-living	https://i5k.nal.usda.gov/habropoda-laboriosa	NCBI	GCF_001263275.1	4240	10	133	43	4415	291297904	39.3	1837695	76
Dinoponera quadriceps	Formicidae	Ponerinae	Formicoidea	Hymenoptera	free-living	antwiki	eusocial	10.1073/pnas.1515937112	NCBI	GCF_001313825.1	4212	13	131	72	4415	258527350	43.59	1361239	100*
Apis dorsata	Apidae	Apinae	Apoidea	Hymenoptera	free-living	Ralph S. Peters et al 2017 (Doi: 10.1016/j.cub.2017.01.027) AND A.Weyna and J.Romiguier (2021) (Doi: 10.24072/pci.evolbiol.100120)	eusocial	Ralph S. Peters et al 2017 (Doi:10.1016/j.cub.2017.01.027)	NCBI	GCF_000469605.1	4243	2	130	42	4415	229675748	31.93	732466	104
Pseudomyrmex gracilis	Formicidae	Pseudomyrmecinae	Formicoidea	Hymenoptera	free-living	antwiki	eusocial	Ralph S. Peters et al 2017 (Doi:10.1016/j.cub.2017.01.027)	NCBI	GCF_002006095.1	4225	13	129	61	4415	282776121	39.1	317681	221
Bombus terrestris	Apidae	Apinae	Apoidea	Hymenoptera	free-living	Ralph S. Peters et al 2017 (Doi: 10.1016/j.cub.2017.01.027) AND A.Weyna and J.Romiguier (2021) (Doi: 10.24072/pci.evolbiol.100120)	eusocial	Ralph S. Peters et al 2017 (Doi:10.1016/j.cub.2017.01.027)	NCBI	GCF_000214255.1	4256	7	128	32	4415	248654244	37.51	12868931	21.4*
Monomorium pharaonis	Formicidae	Myrmicinae	Formicoidea	Hymenoptera	free-living	antwiki	eusocial	Ralph S. Peters et al 2017 (Doi:10.1016/j.cub.2017.01.027)	NCBI	GCF_000980195.1	4238	6	127	50	4415	257940984	36.56	75377	18
Trichogramma pretiosum	Trichogrammatidae	Trichogrammatinae	Chalcidoidea	Hymenoptera	endo-parasitoid	https://bugsforbugs.com.au/product/trichogramma/	endo-parasitoid		NCBI	GCF_000599845.2	4157	51	120	139	4415	195087592	39.92	3706225	232.7*
Formica exsecta	Formicidae	Formicinae	Formicoidea	Hymenoptera	free-living	Ralph S. Peters et al 2017 (Doi: 10.1016/j.cub.2017.01.027) & The book chapter by Xim Cerdá and Alain DejeanAlain Dejean: Predation in the Hymenoptera: An Evolutionary PerspectiveChapter: chapter 3Publisher: TransWorld Research Network, Kerala, India & Arthur Weyna and Jonathan Romiguier (2021) (Doi: 10.24072/pci.evolbiol.100120)	eusocial	Ralph S. Peters et al 2017 (Doi:10.1016/j.cub.2017.01.027)	NCBI	GCF_003651465.1	4257	102	120	43	4415	275309343	36.03	1007268	80*
Nomia melanderi	Halictidae	Nomiinae	Apoidea	Hymenoptera	free-living	Ralph S. Peters et al 2017 (Doi: 10.1016/j.cub.2017.01.027) AND A.Weyna and J.Romiguier (2021) (Doi: 10.24072/pci.evolbiol.100120)	free-living	KM Kapheim et al 2017 (Doi:10.1242/jeb.162255)	NCBI	GCF_003710045.1	4253	7	114	48	4415	301612390	39.78	2631566	68
Lasioglossum albipes	Halictidae	Halictinae	Apoidea	Hymenoptera	free-living	Ralph S. Peters et al 2017 (Doi: 10.1016/j.cub.2017.01.027) AND A.Weyna and J.Romiguier (2021) (Doi: 10.24072/pci.evolbiol.100120)	free-living/eusocial	SD Kocher et al 2018 (Doi:10.1038/s41467-018-06824-8)	NCBI	GCA_000346575.1	4266	46	114	36	4415	335087898	41.47	628755	96
Solenopsis invicta	Formicidae	Myrmicinae	Formicoidea	Hymenoptera	free-living	Ralph S. Peters et al 2017 (Doi: 10.1016/j.cub.2017.01.027) & The book chapter by Xim Cerdá and Alain DejeanAlain Dejean: Predation in the Hymenoptera: An Evolutionary PerspectiveChapter: chapter 3Publisher: TransWorld Research Network, Kerala, India & Arthur Weyna and Jonathan Romiguier (2021) (Doi: 10.24072/pci.evolbiol.100120)	eusocial	Ralph S. Peters et al 2017 (Doi:10.1016/j.cub.2017.01.027)	NCBI	GCF_000188075.2	4248	18	108	60	4415	389649489	36.22	670247	109
Aphaenogaster fulva	Formicidae	Myrmicinae	Formicoidea	Hymenoptera	free-living	Ralph S. Peters et al 2017 (Doi: 10.1016/j.cub.2017.01.027) & The book chapter by Xim Cerdá and Alain DejeanAlain Dejean: Predation in the Hymenoptera: An Evolutionary PerspectiveChapter: chapter 3Publisher: TransWorld Research Network, Kerala, India & Arthur Weyna and Jonathan Romiguier (2021) (Doi: 10.24072/pci.evolbiol.100120)	eusocial	Ralph S. Peters et al 2017 (Doi:10.1016/j.cub.2017.01.027)	NCBI	GCA_003063765.1	4243	18	106	67	4415	346134187	38.39	255328	22
Acromyrmex echinatior	Formicidae	Myrmicinae	Formicoidea	Hymenoptera	free-living	Ralph S. Peters et al 2017 (Doi: 10.1016/j.cub.2017.01.027) & The book chapter by Xim Cerdá and Alain DejeanAlain Dejean: Predation in the Hymenoptera: An Evolutionary PerspectiveChapter: chapter 3Publisher: TransWorld Research Network, Kerala, India & Arthur Weyna and Jonathan Romiguier (2021) (Doi: 10.24072/pci.evolbiol.100120)	eusocial	Ralph S. Peters et al 2017 (Doi:10.1016/j.cub.2017.01.027)	NCBI	GCF_000204515.1	4286	16	101	29	4415	295279671	33.65	1114638	107
Aphaenogaster picea	Formicidae	Myrmicinae	Formicoidea	Hymenoptera	free-living	Ralph S. Peters et al 2017 (Doi: 10.1016/j.cub.2017.01.027) & The book chapter by Xim Cerdá and Alain DejeanAlain Dejean: Predation in the Hymenoptera: An Evolutionary PerspectiveChapter: chapter 3Publisher: TransWorld Research Network, Kerala, India & Arthur Weyna and Jonathan Romiguier (2021) (Doi: 10.24072/pci.evolbiol.100120)	eusocial	Ralph S. Peters et al 2017 (Doi:10.1016/j.cub.2017.01.027)	NCBI	GCA_003063865.1	4270	15	100	45	4415	386044929	38.32	322984	31*
Apis mellifera	Apidae	Apinae	Apoidea	Hymenoptera	free-living	Ralph S. Peters et al 2017 (Doi: 10.1016/j.cub.2017.01.027) AND A.Weyna and J.Romiguier (2021) (Doi: 10.24072/pci.evolbiol.100120)	eusocial	Ralph S. Peters et al 2017 (Doi:10.1016/j.cub.2017.01.027)	NCBI	GCF_003254395.2	4285	9	97	33	4415	250287000	32.69	13219345	70
Crematogaster levior	Formicidae	Myrmicinae	Formicoidea	Hymenoptera	free-living	Ralph S. Peters et al 2017 (Doi: 10.1016/j.cub.2017.01.027) & The book chapter by Xim Cerdá and Alain DejeanAlain Dejean: Predation in the Hymenoptera: An Evolutionary PerspectiveChapter: chapter 3Publisher: TransWorld Research Network, Kerala, India & Arthur Weyna and Jonathan Romiguier (2021) (Doi: 10.24072/pci.evolbiol.100120)	eusocial	Ralph S. Peters et al 2017 (Doi:10.1016/j.cub.2017.01.027)	NCBI	GCA_901521435.1	4236	87	94	89	4415	326199551	36.5	383244	120
Trachymyrmex zeteki	Formicidae	Myrmicinae	Formicoidea	Hymenoptera	free-living	Ralph S. Peters et al 2017 (Doi: 10.1016/j.cub.2017.01.027) & The book chapter by Xim Cerdá and Alain DejeanAlain Dejean: Predation in the Hymenoptera: An Evolutionary PerspectiveChapter: chapter 3Publisher: TransWorld Research Network, Kerala, India & Arthur Weyna and Jonathan Romiguier (2021) (Doi: 10.24072/pci.evolbiol.100120)	eusocial	Ralph S. Peters et al 2017 (Doi:10.1016/j.cub.2017.01.027)	NCBI	GCF_001594055.1	4298	8	93	25	4415	267370203	34.67	1333945	82
Aphaenogaster rudis	Formicidae	Myrmicinae	Formicoidea	Hymenoptera	free-living	Ralph S. Peters et al 2017 (Doi: 10.1016/j.cub.2017.01.027) & The book chapter by Xim Cerdá and Alain DejeanAlain Dejean: Predation in the Hymenoptera: An Evolutionary PerspectiveChapter: chapter 3Publisher: TransWorld Research Network, Kerala, India & Arthur Weyna and Jonathan Romiguier (2021) (Doi: 10.24072/pci.evolbiol.100120)	eusocial	Ralph S. Peters et al 2017 (Doi:10.1016/j.cub.2017.01.027)	NCBI	GCA_003063815.1	4280	22	92	45	4415	395412201	38.25	300103	25*
Orussus abietinus	Orussidae	Orussinae	Orussoidea	Hymenoptera	ecto-parasitoid	Jan Philip Oeyen et al 2020 (Doi:10.1093/gbe/evaa106)	ecto-parasitoid		NCBI	GCF_000612105.2	4216	9	91	108	4415	186373127	45.0	612083	467.1
Aphaenogaster miamiana	Formicidae	Myrmicinae	Formicoidea	Hymenoptera	free-living	Ralph S. Peters et al 2017 (Doi: 10.1016/j.cub.2017.01.027) & The book chapter by Xim Cerdá and Alain DejeanAlain Dejean: Predation in the Hymenoptera: An Evolutionary PerspectiveChapter: chapter 3Publisher: TransWorld Research Network, Kerala, India & Arthur Weyna and Jonathan Romiguier (2021) (Doi: 10.24072/pci.evolbiol.100120)	eusocial	Ralph S. Peters et al 2017 (Doi:10.1016/j.cub.2017.01.027)	NCBI	GCA_003063725.1	4297	18	87	32	4415	342642954	38.21	351517	24*
Linepithema humile	Formicidae	Dolichoderinae	Formicoidea	Hymenoptera	free-living	Ralph S. Peters et al 2017 (Doi: 10.1016/j.cub.2017.01.027) & The book chapter by Xim Cerdá and Alain DejeanAlain Dejean: Predation in the Hymenoptera: An Evolutionary PerspectiveChapter: chapter 3Publisher: TransWorld Research Network, Kerala, India & Arthur Weyna and Jonathan Romiguier (2021) (Doi: 10.24072/pci.evolbiol.100120)	eusocial	Ralph S. Peters et al 2017 (Doi:10.1016/j.cub.2017.01.027)	NCBI	GCF_000217595.1	4301	12	86	28	4415	219481541	37.66	1402257	30*
Trachymyrmex cornetzi	Formicidae	Myrmicinae	Formicoidea	Hymenoptera	free-living	Ralph S. Peters et al 2017 (Doi: 10.1016/j.cub.2017.01.027) & The book chapter by Xim Cerdá and Alain DejeanAlain Dejean: Predation in the Hymenoptera: An Evolutionary PerspectiveChapter: chapter 3Publisher: TransWorld Research Network, Kerala, India & Arthur Weyna and Jonathan Romiguier (2021) (Doi: 10.24072/pci.evolbiol.100120)	eusocial	Ralph S. Peters et al 2017 (Doi:10.1016/j.cub.2017.01.027)	NCBI	GCF_001594075.1	4306	14	84	26	4415	365804499	35.01	773208	109
Dufourea novaeangliae	Halictidae	Rophitinae	Apoidea	Hymenoptera	free-living	Ralph S. Peters et al 2017 (Doi: 10.1016/j.cub.2017.01.027) AND A.Weyna and J.Romiguier (2021) (Doi: 10.24072/pci.evolbiol.100120)	free-living	CP Costa et al 2022 (Doi:10.3389/fphys.2022.831928)	NCBI	GCF_001272555.1	4296	8	83	36	4415	278770933	39.48	2549405	130
Cyphomyrmex costatus	Formicidae	Myrmicinae	Formicoidea	Hymenoptera	free-living	Ralph S. Peters et al 2017 (Doi: 10.1016/j.cub.2017.01.027) & The book chapter by Xim Cerdá and Alain DejeanAlain Dejean: Predation in the Hymenoptera: An Evolutionary PerspectiveChapter: chapter 3Publisher: TransWorld Research Network, Kerala, India & Arthur Weyna and Jonathan Romiguier (2021) (Doi: 10.24072/pci.evolbiol.100120)	eusocial	Ralph S. Peters et al 2017 (Doi:10.1016/j.cub.2017.01.027)	NCBI	GCF_001594065.1	4303	32	82	32	4415	297730753	34.72	1165170	91
Wasmannia auropunctata	Formicidae	Myrmicinae	Formicoidea	Hymenoptera	free-living	Ralph S. Peters et al 2017 (Doi: 10.1016/j.cub.2017.01.027) & The book chapter by Xim Cerdá and Alain DejeanAlain Dejean: Predation in the Hymenoptera: An Evolutionary PerspectiveChapter: chapter 3Publisher: TransWorld Research Network, Kerala, India & Arthur Weyna and Jonathan Romiguier (2021) (Doi: 10.24072/pci.evolbiol.100120)	eusocial	Ralph S. Peters et al 2017 (Doi:10.1016/j.cub.2017.01.027)	NCBI	GCF_000956235.1	4305	9	78	32	4415	306205287	38.55	1386614	87
Aphaenogaster ashmeadi	Formicidae	Myrmicinae	Formicoidea	Hymenoptera	free-living	Ralph S. Peters et al 2017 (Doi: 10.1016/j.cub.2017.01.027) & The book chapter by Xim Cerdá and Alain DejeanAlain Dejean: Predation in the Hymenoptera: An Evolutionary PerspectiveChapter: chapter 3Publisher: TransWorld Research Network, Kerala, India & Arthur Weyna and Jonathan Romiguier (2021) (Doi: 10.24072/pci.evolbiol.100120)	eusocial	Ralph S. Peters et al 2017 (Doi:10.1016/j.cub.2017.01.027)	NCBI	GCA_003063805.1	4296	23	78	41	4415	310333780	38.27	336807	32*
Aphaenogaster floridana	Formicidae	Myrmicinae	Formicoidea	Hymenoptera	free-living	Ralph S. Peters et al 2017 (Doi: 10.1016/j.cub.2017.01.027) & The book chapter by Xim Cerdá and Alain DejeanAlain Dejean: Predation in the Hymenoptera: An Evolutionary PerspectiveChapter: chapter 3Publisher: TransWorld Research Network, Kerala, India & Arthur Weyna and Jonathan Romiguier (2021) (Doi: 10.24072/pci.evolbiol.100120)	eusocial	Ralph S. Peters et al 2017 (Doi:10.1016/j.cub.2017.01.027)	NCBI	GCA_003063835.1	4307	19	75	35	4415	382861007	38.03	439114	28*
Trachymyrmex septentrionalis	Formicidae	Myrmicinae	Formicoidea	Hymenoptera	free-living	Ralph S. Peters et al 2017 (Doi: 10.1016/j.cub.2017.01.027) & The book chapter by Xim Cerdá and Alain DejeanAlain Dejean: Predation in the Hymenoptera: An Evolutionary PerspectiveChapter: chapter 3Publisher: TransWorld Research Network, Kerala, India & Arthur Weyna and Jonathan Romiguier (2021) (Doi: 10.24072/pci.evolbiol.100120)	eusocial	Ralph S. Peters et al 2017 (Doi:10.1016/j.cub.2017.01.027)	NCBI	GCF_001594115.1	4320	16	70	26	4415	290716531	34.46	2520094	84
Atta colombica	Formicidae	Myrmicinae	Formicoidea	Hymenoptera	free-living	Ralph S. Peters et al 2017 (Doi: 10.1016/j.cub.2017.01.027) & The book chapter by Xim Cerdá and Alain DejeanAlain Dejean: Predation in the Hymenoptera: An Evolutionary PerspectiveChapter: chapter 3Publisher: TransWorld Research Network, Kerala, India & Arthur Weyna and Jonathan Romiguier (2021) (Doi: 10.24072/pci.evolbiol.100120)	eusocial	Ralph S. Peters et al 2017 (Doi:10.1016/j.cub.2017.01.027)	NCBI	GCF_001594045.1	4321	9	69	26	4415	291072577	32.74	2037154	129
Athalia rosae	Tenthredinidae	Tenthredininae	Tenthredinoidea	Hymenoptera	free-living	http://www.agroatlas.ru/en/content/pests/Athalia_rosae/index.html	free-living		NCBI	GCF_000344095.2	4307	19	69	39	4415	155798676	41.18	943070	247
Harpegnathos saltator	Formicidae	Ponerinae	Formicoidea	Hymenoptera	free-living	Ralph S. Peters et al 2017 (Doi: 10.1016/j.cub.2017.01.027) & The book chapter by Xim Cerdá and Alain DejeanAlain Dejean: Predation in the Hymenoptera: An Evolutionary PerspectiveChapter: chapter 3Publisher: TransWorld Research Network, Kerala, India & Arthur Weyna and Jonathan Romiguier (2021) (Doi: 10.24072/pci.evolbiol.100120)	eusocial	Ralph S. Peters et al 2017 (Doi:10.1016/j.cub.2017.01.027)	NCBI	GCF_003227715.1	4308	18	66	42	4415	334536844	44.75	1078644	19
Vollenhovia emeryi	Formicidae	Myrmicinae	Formicoidea	Hymenoptera	free-living	Ralph S. Peters et al 2017 (Doi: 10.1016/j.cub.2017.01.027) & The book chapter by Xim Cerdá and Alain DejeanAlain Dejean: Predation in the Hymenoptera: An Evolutionary PerspectiveChapter: chapter 3Publisher: TransWorld Research Network, Kerala, India & Arthur Weyna and Jonathan Romiguier (2021) (Doi: 10.24072/pci.evolbiol.100120)	eusocial	Ralph S. Peters et al 2017 (Doi:10.1016/j.cub.2017.01.027)	NCBI	GCF_000949405.1	4329	13	65	22	4415	287900827	42.17	1346088	105
Eufriesea mexicana	Apidae	Apinae	Apoidea	Hymenoptera	free-living	Ralph S. Peters et al 2017 (Doi: 10.1016/j.cub.2017.01.027) AND A.Weyna and J.Romiguier (2021) (Doi: 10.24072/pci.evolbiol.100120)	free-living	CP Costa et al 2022 (Doi:10.3389/fphys.2022.831928)	NCBI	GCF_001483705.1	4317	39	62	36	4415	567137170	40.85	382326	56
Polistes canadensis	Vespidae	Polistinae	Vespoidea	Hymenoptera	free-living	H.Kovac et al 2019 (Doi:10.3390/insects10070187)	free-living	J da Silva et al 2021 (Doi:10.3389/fevo.2021.727124)	NCBI	GCF_001313835.1	4301	14	61	53	4415	211202212	32.15	521566	10
Polistes dominula	Vespidae	Polistinae	Vespoidea	Hymenoptera	free-living	H.Kovac et al 2019 (Doi:10.3390/insects10070187)	free-living	J da Silva et al 2021 (Doi:10.3389/fevo.2021.727124)	NCBI	GCF_001465965.1	4314	11	59	42	4415	208026220	30.77	1625592	181
Cephus cinctus	Cephidae	Cephinae	Cephoidea	Hymenoptera	free-living	Hugh M Robertson et al 2018 (doi:10.1093/gbe/evy232)	free-living		NCBI	GCF_000341935.1	4331	10	58	26	4415	162226239	40.33	622163	216
Osmia bicornis	Megachilidae	Megachilinae	Apoidea	Hymenoptera	free-living	Ralph S. Peters et al 2017 (Doi: 10.1016/j.cub.2017.01.027) AND A.Weyna and J.Romiguier (2021) (Doi: 10.24072/pci.evolbiol.100120)	free-living	CP Costa et al 2022 (Doi:10.3389/fphys.2022.831928)	NCBI	GCF_004153925.1	4336	10	55	24	4415	210591136	39.77	607766	121
Ooceraea biroi	Formicidae	Dorylinae	Formicoidea	Hymenoptera	free-living	Ralph S. Peters et al 2017 (Doi: 10.1016/j.cub.2017.01.027) & The book chapter by Xim Cerdá and Alain DejeanAlain Dejean: Predation in the Hymenoptera: An Evolutionary PerspectiveChapter: chapter 3Publisher: TransWorld Research Network, Kerala, India & Arthur Weyna and Jonathan Romiguier (2021) (Doi: 10.24072/pci.evolbiol.100120)	eusocial	Ralph S. Peters et al 2017 (Doi:10.1016/j.cub.2017.01.027)	NCBI	GCF_003672135.1	4313	21	48	56	4415	223893595	41.31	16888278	160
Camponotus floridanus	Formicidae	Formicinae	Formicoidea	Hymenoptera	free-living	Ralph S. Peters et al 2017 (Doi: 10.1016/j.cub.2017.01.027) & The book chapter by Xim Cerdá and Alain DejeanAlain Dejean: Predation in the Hymenoptera: An Evolutionary PerspectiveChapter: chapter 3Publisher: TransWorld Research Network, Kerala, India & Arthur Weyna and Jonathan Romiguier (2021) (Doi: 10.24072/pci.evolbiol.100120)	eusocial	Ralph S. Peters et al 2017 (Doi:10.1016/j.cub.2017.01.027)	NCBI	GCF_003227725.1	4353	20	46	18	4415	284009182	34.31	1585631	53*
Bombus impatiens	Apidae	Apinae	Apoidea	Hymenoptera	free-living	Ralph S. Peters et al 2017 (Doi: 10.1016/j.cub.2017.01.027) AND A.Weyna and J.Romiguier (2021) (Doi: 10.24072/pci.evolbiol.100120)	eusocial	Ralph S. Peters et al 2017 (Doi:10.1016/j.cub.2017.01.027)	NCBI	GCF_000188095.3	4356	9	44	15	4415	248187610	37.75	1399493	35
Megachile rotundata	Megachilidae	Megachilinae	Apoidea	Hymenoptera	free-living	Ralph S. Peters et al 2017 (Doi: 10.1016/j.cub.2017.01.027) AND A.Weyna and J.Romiguier (2021) (Doi: 10.24072/pci.evolbiol.100120)	free-living	CP Costa et al 2022 (Doi:10.3389/fphys.2022.831928)	NCBI	GCF_000220905.1	4358	3	41	16	4415	271532722	36.55	1699680	98
Ganaspis brasiliensis	Figitidae	Figitinae	Cynipoidea	Hymenoptera	endo-parasitoid	E.H.Beers et al 2022 (Doi:10.3897/jhr.91.82812)	endo-parasitoid		NCBI	GCA_009823575.1	1917	18	1289	1209	4415	683910252	27.68	5739	25
Ganaspis sp	Figitidae	Figitinae	Cynipoidea	Hymenoptera	endo-parasitoid	P.Girod et al 2018 (Doi:10.1111/jen.12496)	endo-parasitoid		NCBI	GCA_011057455.1	2701	17	885	829	4415	496623227	29.79	6451	16
Unknown species	NA	NA	Chalcidoidea ?	Hymenoptera	Unknown		Unknown		this study	JAQJZY000000000	1179	5	1399	3413	5991	NA	NA	NA	4
Platygaster orseoliae	Platygastridae	Platygastrinae	Platygastroidea	Hymenoptera	endo-parasitoid	Buhl and Hidayat 2015 (Doi:10.1080/00207233.2015.1092855)	endo-parasitoid		this study	JAPYZL000000000	3024	23	1091	1876	5991	519138286	32.94	5062	33
Eretmocerus eremicus	Aphelinidae	Eretmocerinae	Chalcidoidea	Hymenoptera	Ecto/endo-parasitoid	https://biocontrol.entomology.cornell.edu/parasitoids/eretmocerus.php, Mohammad Javad Ardeh (SBN: 90-8504-174-0)	Ecto/endo-parasitoid		this study	JAPYYZ000000000	2270	17	911	1234	4415	538701332	42.64	3925	29
Eupelmus kiefferi	Eupelmidae	Eupelminae	Chalcidoidea	Hymenoptera	ecto-parasitoid	Al khatib et al. 2016 (Doi:10.1186/s12862-015-0571-2)	ecto-parasitoid		this study	JAPYZB000000000	2995	26	818	602	4415	462435127	35.66	3542	15
Platygaster equestris	Platygastridae	Platygastrinae	Platygastroidea	Hymenoptera	endo-parasitoid	Peter N Buhl et al 2016 (Doi:10.3897/BDJ.4.e7991)	endo-parasitoid		this study	JAPYZK000000000	2817	24	781	817	4415	273406551	34.78	8694	29
Ceratosolen corneri	Agaonidae	Kradibiinae	Chalcidoidea	Hymenoptera	free-living	http://www.figweb.org/fig_wasps/agaonidae/Kradibiinae/index.htm	free-living		this study	JAPYYT000000000	3027	9	685	704	4415	309712932	33.85	7910	55
Ichneumoninae B	Ichneumonidae	Ichneumoninae	Ichneumonoidea	Hymenoptera	endo-parasitoid	NBN atlas	endo-parasitoid		this study	JAPYZD000000000	3461	15	628	326	4415	260132426	41.67	13042	8
Ichneumoninae A	Ichneumonidae	Ichneumoninae	Ichneumonoidea	Hymenoptera	endo-parasitoid	NBN atlas	endo-parasitoid		this study	JAPYZC000000000	3526	15	617	272	4415	254274803	42.14	13646	20
Trichopria nigra	Diapriidae	Diapriinae	Diaprioidea	Hymenoptera	endo-parasitoid	Huggert & Morgan 1993 (Doi:10.1111/j.1365-2915.1993.tb00705.x)	endo-parasitoid		this study	JAPYZR000000000	3153	43	605	658	4415	396335665	34.81	9241	35
Torymus sinensis	Torymidae	Toryminae	Chalcidoidea	Hymenoptera	ecto-parasitoid	CS Kim et al 2005 (Doi:10.1016/j.biocontrol.2013.07.012)	ecto-parasitoid		this study	JAPYZP000000000	2806	22	588	1022	4415	471282933	38.0	4730	6
Copidosoma aretas	Encyrtidae	Encyrtinae	Chalcidoidea	Hymenoptera	endo-parasitoid	Emilio Guerrieri & John Noyes (2005) (Doi:10.1111/j.1365-3113.2005.00271.x )	endo-parasitoid		this study	JAPYYV000000000	3485	24	488	442	4415	699215440	36.46	10118	17
Torymus flavipes	Torymidae	Toryminae	Chalcidoidea	Hymenoptera	ecto-parasitoid	https://www.nhm.ac.uk/our-science/data/chalcidoids/torymidae.html	ecto-parasitoid		this study	JAPYZO000000000	3658	36	488	272	4415	401967120	37.97	7455	11
Psyttalia lounsburyi	Braconidae	Opiinae	Ichneumonoidea	Hymenoptera	endo-parasitoid	Chanté Powel et al 2020 (Doi:10.3390/insects11120854)	endo-parasitoid		this study	JAPYZN000000000	3583	14	484	348	4415	213403230	39.06	8109	32
Eupelmus azureus	Eupelmidae	Eupelminae	Chalcidoidea	Hymenoptera	ecto-parasitoid	Al khatib et al. 2016 (Doi:10.1186/s12862-015-0571-2)	ecto-parasitoid		this study	JAPYZA000000000	3707	41	473	237	4415	417111844	36.5	8355	29
Psyttalia concolor	Braconidae	Opiinae	Ichneumonoidea	Hymenoptera	endo-parasitoid	Chanté Powel et al 2020 (Doi:10.3390/insects11120854)	endo-parasitoid		this study	JAPYZM000000000	3637	14	456	323	4415	235859789	39.56	9080	44
Ophioninae B	Ichneumonidae	Ophioninae	Ichneumonoidea	Hymenoptera	endo-parasitoid	http://www.waspweb.org	endo-parasitoid		this study	JAPYZJ000000000	3783	8	422	210	4415	274276546	38.79	20373	52
Cremastinae A	Ichneumonidae	Cremastinae	Ichneumonoidea	Hymenoptera	endo-parasitoid	Pascal Rousse & Simon van Noort (2015) (Doi:10.5852/ejt.2015.124 )	endo-parasitoid		this study	JAPYYW000000000	3749	5	420	246	4415	223332502	36.23	28138	95
Encarsia formosa	Aphelinidae	Coccophaginae	Chalcidoidea	Hymenoptera	endo-parasitoid	https://biocontrol.entomology.cornell.edu/parasitoids/encarsia.php	endo-parasitoid		this study	JAPYYY000000000	3640	53	416	360	4415	314766929	34.54	11552	33
Leptomastidea abnormis	Encyrtidae	Encyrtinae	Chalcidoidea	Hymenoptera	endo-parasitoid	Akshay Kumar Chakravarthy, Shakunthala Sridhara (ISBN:981101518X, 9789811015182)	endo-parasitoid		this study	JAPYZE000000000	3773	32	411	232	4415	312685629	33.15	10413	46
Cremastinae B	Ichneumonidae	Cremastinae	Ichneumonoidea	Hymenoptera	endo-parasitoid	Pascal Rousse & Simon van Noort (2015) (Doi:10.5852/ejt.2015.124 )	endo-parasitoid		this study	JAPYYX000000000	3849	7	384	182	4415	191744766	36.8	30676	49
Ceratosolen marchali	Agaonidae	Kradibiinae	Chalcidoidea	Hymenoptera	free-living	Chun Chen & Qishi Song (2008) (Doi:10.1007/s10886-008-9558-4 )	free-living		this study	JAPYYU000000000	3813	11	383	220	4415	270631741	30.16	49142	48
Tryphoninae B	Ichneumonidae	Tryphoninae	Ichneumonoidea	Hymenoptera	ecto-parasitoid	Donald L. J. Quicke - 2015 (ISBN:1118907051, 9781118907054),https://bugguide.net/node/view/250255	ecto-parasitoid		this study	JAPYZU000000000	3907	16	351	157	4415	210597836	39.23	9223	63
Ophioninae A	Ichneumonidae	Ophioninae	Ichneumonoidea	Hymenoptera	endo-parasitoid	http://www.waspweb.org	endo-parasitoid		this study	JAPYZI000000000	3943	7	337	135	4415	227268138	38.89	32989	76
Trissolcus japonicus	Platygastridae	Telenominae	Platygastroidea	Hymenoptera	endo-parasitoid	Arthur V. Ribeiro et al 2021 (Doi:10.3389/finsc.2021.685755)	endo-parasitoid		this study	JAPYZS000000000	3842	40	288	286	4415	156321667	35.38	74819	90
Anagyrus pseudococci	Encyrtidae	Tetracneminae	Chalcidoidea	Hymenoptera	endo-parasitoid	https://entnemdept.ufl.edu/creatures/BENEFICIAL/Anagyrus_pseudococci.htm	endo-parasitoid		this study	JAPYYQ000000000	3981	34	269	166	4415	266885298	41.59	29684	48
Trissolcus brochymenae	Platygastridae	Telenominae	Platygastroidea	Hymenoptera	endo-parasitoid	Alessia Lacovone et al 2016 (Doi:10.1016/j.jinsphys.2016.07.001)	endo-parasitoid		this study	JAQQRF000000000	3884	36	267	265	4415	149067578	35.1	134433	116
Aphidius colemani	Braconidae	Aphidiinae	Ichneumonoidea	Hymenoptera	endo-parasitoid	Benelli et al. 2014 (Doi:10.1603/EC14291)	endo-parasitoid		this study	JAPYYR000000000	3886	28	264	265	4415	106140005	26.8	24129	90
Tryphoninae A	Ichneumonidae	Tryphoninae	Ichneumonoidea	Hymenoptera	ecto-parasitoid	Donald L. J. Quicke - 2015 (ISBN:1118907051, 9781118907054),https://bugguide.net/node/view/250255	ecto-parasitoid		this study	JAPYZT000000000	4041	11	259	115	4415	208397322	39.35	16419	78
Meteorus colon F	Braconidae	Meteorinae	Ichneumonoidea	Hymenoptera	endo-parasitoid	Shunpei Fujie et al 2021 (Doi:10.3897/jhr.86.71225)	endo-parasitoid		this study	JAPYZG000000000	4024	13	245	146	4415	127800032	34.24	35335	139
Trichogramma brassicae	Trichogrammatidae	Trichogrammatinae	Chalcidoidea	Hymenoptera	endo-parasitoid	https://www.buglogical.com/trichogramma/trichogramma-brassicae-wasps/	endo-parasitoid		this study	JAPYZQ000000000	3963	46	241	212	4415	187482126	39.83	23593	19
Campopleginae	Ichneumonidae	Campopleginae	Ichneumonoidea	Hymenoptera	endo-parasitoid	https://www.discoverlife.org/nh/tx/Insecta/Hymenoptera/Ichneumonoidea/Ichneumonidae/Campopleginae/#Wahl,%201993	endo-parasitoid		this study	JAPYYS000000000	4135	14	203	77	4415	170462951	40.19	135248	70
Meteorus colon M	Braconidae	Meteorinae	Ichneumonoidea	Hymenoptera	endo-parasitoid	Shunpei Fujie et al 2021 (Doi :10.3897/jhr.86.71225)	endo-parasitoid		this study	JAPYZH000000000	4134	15	171	110	4415	129383299	34.24	215404	78
Meteorus cinctellus	Braconidae	Meteorinae	Ichneumonoidea	Hymenoptera	endo-parasitoid	Shunpei Fujie et al 2021 (Doi :10.3897/jhr.86.71225)	endo-parasitoid		this study	KAPYZF000000000	4139	14	164	112	4415	130246189	34.32	237827	81
The coverage with a star have been retrieved from the NCBI genome metadata as no reads were available at the time of our study. BUSCOs statistics were obtained using BUSCOv3 using the hymenoptera odb9 dataset. Other genomic statistics have been calculated using Quast.
