# Supplementary material for: Endoparasitoid lifestyle promotes endogenization and domestication of dsDNA viruses
Source: eLife. 2023 Jun 6;12:e85993. doi: 10.7554/eLife.85993 (PMC10259472; doi:10.7554/eLife.85993)
Supplement: Supplementary file 3. [file elife-85993-supp3.xlsx]

## Sheet: Summary_control_EVEs
	V. canescens	F. arisanus	C. vestalis	M. demolitor	L. boulardi	L. heterotoma	L. clavipes	% Total
Number EVEs [1]	36/40	42/47	20/21	18/25	12/13	12/13	12/13	88.4 %
Scaffold A	36	42	18	16	11	6	8	90.13 %
Scaffold B	0	0	0	0	0	0	0	0
Scaffold C	0	0	0	0	1	6	4	7.24 %
Scaffold D	0	0	2	2	0	0	0	2.63 %
Scaffolds E-F-X	0	0	0	0	0	0	0	0
Number dEVEs	22/36	11/42	20/20	18/18	12/12	12/12	12/12	71.82 %
dN/dS [2]	03/03	0/1	16/20	15/18	12/12	12/12	12/12	70.39 %
by TPM 1000	21	11	10	9	1	0	0	43.60 %
Number Events	1/1	1/1	3/1*		1/1
[1] When paralogs were detected on different scaffolds, the best scaffold score was used.
[2] Analysis on dN/dS was only possible when orthologs or paralogs were detected (for example, in V. canescens this calculation was only possible for 3 genes having paralogs).
The numerator indicates the numbers of EVEs or dEVEs inferred by our pipeline, and the denominator indicates the number of known EVEs for each case. Analysis on dN/dS was only possible when orthologs or paralogs were available. Controls Endogenous viral elements present in scaffolds probably belonging to the Hymenoptera genome are scored from A to D, and scaffolds probably belonging to free virus…
