# Supplementary material for: Endoparasitoid lifestyle promotes endogenization and domestication of dsDNA viruses
Source: eLife. 2023 Jun 6;12:e85993. doi: 10.7554/eLife.85993 (PMC10259472; doi:10.7554/eLife.85993)
Supplement: Supplementary file 4. — Endogenized loci (scoring from A to D) are displayed in the first sheet, whereas exogenous loci (from E to X) are displayed in the second sheet. [file elife-85993-supp4.xlsx]

## Sheet: Endogenous viral elements (A-D)
ID	consensus_family_ID	Clustername	Event	New_query_bis2	Species_name	query_bis	Scaffold_species	count	Nb_Transcripto_Reads	TPM	Nb_Transcripto_Reads_whole_body	TPM_whole_body	TPM_all	target	family_y	Unnamed..0_x	Scaff_name	count_repeat	count_eucaryote	pident	alnlen	mismatch	gapopen	qstart	qend	tstart	tend	evalue	bits	tlen	Taxid	no_rank	species	genus	family	consensus_family	superkingdom	subfamily	superfamily	infraorder	suborder	order	cohort	infraclass	subclass	class	subphylum	phylum	kingdom
303	Baculoviridae	Cluster10014	1	scaffold_5775:57-774(+):Copidosoma_sp	Copidosoma_sp	scaffold_5775_57-774_+__Copidosoma_sp	scaffold_5775:Copidosoma_sp	NA	NA	NA	NA	NA	NA	YP_003422388	NA	97147	scaffold_5775:Copidosoma_sp	NA	0	21.9	234	176	0	1	234	328	553	7.66e-10	63	571	36355	Pseudalatia_unipuncta_granulovirus	Mythimna_unipuncta_granulovirus_A	Betabaculovirus	Baculoviridae	Baculoviridae	Viruses	NA	NA	NA	NA	NA	NA	NA	NA	NA	NA	NA	NA
303	Baculoviridae	Cluster10014	24	scaffold_28134:3860-5012(+):Copidosoma_sp	Copidosoma_sp	scaffold_28134_3860-5012_+__Copidosoma_sp	scaffold_28134:Copidosoma_sp	NA	NA	NA	NA	NA	NA	YP_003422388	NA	97972	scaffold_28134:Copidosoma_sp	NA	0	21.3	355	233	0	4	358	4	300	3.741e-17	89	571	36355	Pseudalatia_unipuncta_granulovirus	Mythimna_unipuncta_granulovirus_A	Betabaculovirus	Baculoviridae	Baculoviridae	Viruses	NA	NA	NA	NA	NA	NA	NA	NA	NA	NA	NA	NA
303	Baculoviridae	Cluster10014	24	scaffold_6852:33513-34605(+):Copidosoma_sp	Copidosoma_sp	scaffold_6852_33513-34605_+__Copidosoma_sp	scaffold_6852:Copidosoma_sp	1	NA	NA	NA	NA	NA	YP_003422388	NA	97180	scaffold_6852:Copidosoma_sp	1	0	20.6	354	245	0	3	356	3	311	3.127e-15	82	571	36355	Pseudalatia_unipuncta_granulovirus	Mythimna_unipuncta_granulovirus_A	Betabaculovirus	Baculoviridae	Baculoviridae	Viruses	NA	NA	NA	NA	NA	NA	NA	NA	NA	NA	NA	NA
303	Baculoviridae	Cluster10014	24	scf7180005170136_1:7295-8519(+):Leptopilina_clavipes	Leptopilina_clavipes	scf7180005170136_1_7295-8519_+__Leptopilina_clavipes	scf7180005170136_1:Leptopilina_clavipes	NA	NA	NA	0	0	0	YP_009116744	NA	97364	scf7180005170136_1:Leptopilina_clavipes	NA	0	18.5	410	328	0	5	408	203	612	1.42e-12	74	642	1546257	unclassified_Nudiviridae	Tipula_oleracea_nudivirus	NA	Nudiviridae	Nudiviridae	Viruses	NA	NA	NA	NA	NA	NA	NA	NA	NA	NA	NA	NA
303	Baculoviridae	Cluster915	1	scaffold_11405:7622-8171(+):Copidosoma_sp	Copidosoma_sp	scaffold_11405_7622-8171_+__Copidosoma_sp	scaffold_11405:Copidosoma_sp	4	NA	NA	NA	NA	NA	YP_009666553	NA	84016	scaffold_11405:Copidosoma_sp	4	1	45.9	184	98	0	1	183	85	268	5.677e-42	155	514	2083176	NA	Oxyplax_ochracea_nucleopolyhedrovirus	Alphabaculovirus	Baculoviridae	Baculoviridae	Viruses	NA	NA	NA	NA	NA	NA	NA	NA	NA	NA	NA	NA
77	Nudiviridae	Cluster10014	11	IDBA_scaffold_13445:644-1520(-):Leptopilina_boulardi	Leptopilina_boulardi	IDBA_scaffold_13445_644-1520_-__Leptopilina_boulardi	IDBA_scaffold_13445:Leptopilina_boulardi	NA	NA	NA	264	140.894	140.894	YP_009116744	NA	100212	IDBA_scaffold_13445:Leptopilina_boulardi	NA	0	21.7	347	228	0	1	292	266	612	5.265e-18	89	642	1546257	unclassified_Nudiviridae	Tipula_oleracea_nudivirus	NA	Nudiviridae	Nudiviridae	Viruses	NA	NA	NA	NA	NA	NA	NA	NA	NA	NA	NA	NA
77	Nudiviridae	Cluster10014	14	IDBA_scaffold_53263:24-564(-):Leptopilina_boulardi	Leptopilina_boulardi	IDBA_scaffold_53263_24-564_-__Leptopilina_boulardi	IDBA_scaffold_53263:Leptopilina_boulardi	NA	NA	NA	163	141.02	141.02	YP_009116744	NA	97877	IDBA_scaffold_53263:Leptopilina_boulardi	NA	0	30.1	164	113	0	4	167	456	617	4.384e-15	77	642	1546257	unclassified_Nudiviridae	Tipula_oleracea_nudivirus	NA	Nudiviridae	Nudiviridae	Viruses	NA	NA	NA	NA	NA	NA	NA	NA	NA	NA	NA	NA
77	Nudiviridae	Cluster10014	9	IDBA_scaffold_1832:13976-14762(+):Leptopilina_boulardi	Leptopilina_boulardi	IDBA_scaffold_1832_13976-14762_+__Leptopilina_boulardi	IDBA_scaffold_1832:Leptopilina_boulardi	NA	NA	NA	173	102.887	102.887	YP_009116744	NA	65138	IDBA_scaffold_1832:Leptopilina_boulardi	NA	7	19.8	300	209	0	1	262	271	570	3.369e-10	65	642	1546257	unclassified_Nudiviridae	Tipula_oleracea_nudivirus	NA	Nudiviridae	Nudiviridae	Viruses	NA	NA	NA	NA	NA	NA	NA	NA	NA	NA	NA	NA
95	Nudiviridae	Cluster10014	13	IDBA_scaffold_17058:7523-8462(+):Leptopilina_heterotoma	Leptopilina_heterotoma	IDBA_scaffold_17058_7523-8462_+__Leptopilina_heterotoma	IDBA_scaffold_17058:Leptopilina_heterotoma	NA	NA	NA	519	295.345	295.345	YP_009116744	NA	97853	IDBA_scaffold_17058:Leptopilina_heterotoma	NA	0	23.5	360	236	0	4	313	271	630	3.084e-24	109	642	1546257	unclassified_Nudiviridae	Tipula_oleracea_nudivirus	NA	Nudiviridae	Nudiviridae	Viruses	NA	NA	NA	NA	NA	NA	NA	NA	NA	NA	NA	NA
95	Nudiviridae	Cluster10014	4	IDBA_scaffold_13623:199-1360(-):Leptopilina_heterotoma	Leptopilina_heterotoma	IDBA_scaffold_13623_199-1360_-__Leptopilina_heterotoma	IDBA_scaffold_13623:Leptopilina_heterotoma	NA	NA	NA	0	0	0	YP_009116744	NA	62927	IDBA_scaffold_13623:Leptopilina_heterotoma	NA	1	19.3	416	312	0	1	387	203	618	2.214e-15	83	642	1546257	unclassified_Nudiviridae	Tipula_oleracea_nudivirus	NA	Nudiviridae	Nudiviridae	Viruses	NA	NA	NA	NA	NA	NA	NA	NA	NA	NA	NA	NA
95	Nudiviridae	Cluster10014	6	IDBA_scaffold_41570:553-1792(+):Leptopilina_heterotoma	Leptopilina_heterotoma	IDBA_scaffold_41570_553-1792_+__Leptopilina_heterotoma	IDBA_scaffold_41570:Leptopilina_heterotoma	NA	NA	NA	645	278.245	278.245	YP_009116744	NA	97686	IDBA_scaffold_41570:Leptopilina_heterotoma	NA	0	19	419	330	0	5	413	196	614	1.543e-14	81	642	1546257	unclassified_Nudiviridae	Tipula_oleracea_nudivirus	NA	Nudiviridae	Nudiviridae	Viruses	NA	NA	NA	NA	NA	NA	NA	NA	NA	NA	NA	NA
36	Nudiviridae	Cluster10014	15	scaffold_23663:1954-2857(+):Ganaspis_ganaspis	Ganaspis_ganaspis	scaffold_23663_1954-2857_+__Ganaspis_ganaspis	scaffold_23663:Ganaspis_ganaspis	NA	NA	NA	NA	NA	NA	YP_009116744	NA	98278	scaffold_23663:Ganaspis_ganaspis	NA	0	21.6	347	234	0	2	301	271	617	1.136e-17	89	642	1546257	unclassified_Nudiviridae	Tipula_oleracea_nudivirus	NA	Nudiviridae	Nudiviridae	Viruses	NA	NA	NA	NA	NA	NA	NA	NA	NA	NA	NA	NA
36	Nudiviridae	Cluster10014	26	scaffold_33311:5256-6033(-):Ganaspis_ganaspis	Ganaspis_ganaspis	scaffold_33311_5256-6033_-__Ganaspis_ganaspis	scaffold_33311:Ganaspis_ganaspis	NA	NA	NA	NA	NA	NA	YP_009116744	NA	97411	scaffold_33311:Ganaspis_ganaspis	NA	0	26	271	173	0	25	259	344	614	2.338e-21	98	642	1546257	unclassified_Nudiviridae	Tipula_oleracea_nudivirus	NA	Nudiviridae	Nudiviridae	Viruses	NA	NA	NA	NA	NA	NA	NA	NA	NA	NA	NA	NA
36	Nudiviridae	Cluster10014	26	scaffold_38559:356-1025(+):Ganaspis_ganaspis	Ganaspis_ganaspis	scaffold_38559_356-1025_+__Ganaspis_ganaspis	scaffold_38559:Ganaspis_ganaspis	NA	NA	NA	NA	NA	NA	YP_009116744	NA	100208	scaffold_38559:Ganaspis_ganaspis	NA	0	21.1	252	175	0	1	223	344	595	1.045e-09	63	642	1546257	unclassified_Nudiviridae	Tipula_oleracea_nudivirus	NA	Nudiviridae	Nudiviridae	Viruses	NA	NA	NA	NA	NA	NA	NA	NA	NA	NA	NA	NA
36	Nudiviridae	Cluster10014	5	scaffold_22361:2052-3249(+):Ganaspis_ganaspis	Ganaspis_ganaspis	scaffold_22361_2052-3249_+__Ganaspis_ganaspis	scaffold_22361:Ganaspis_ganaspis	NA	NA	NA	NA	NA	NA	YP_009116744	NA	97080	scaffold_22361:Ganaspis_ganaspis	NA	0	21.6	410	292	0	9	381	203	612	5.1e-22	104	642	1546257	unclassified_Nudiviridae	Tipula_oleracea_nudivirus	NA	Nudiviridae	Nudiviridae	Viruses	NA	NA	NA	NA	NA	NA	NA	NA	NA	NA	NA	NA
36	Nudiviridae	Cluster10014	7	scaffold_7613:6664-7549(+):Ganaspis_ganaspis	Ganaspis_ganaspis	scaffold_7613_6664-7549_+__Ganaspis_ganaspis	scaffold_7613:Ganaspis_ganaspis	1	NA	NA	NA	NA	NA	YP_009116744	NA	98009	scaffold_7613:Ganaspis_ganaspis	1	0	22.1	340	229	0	1	295	275	614	1.678e-18	91	642	1546257	unclassified_Nudiviridae	Tipula_oleracea_nudivirus	NA	Nudiviridae	Nudiviridae	Viruses	NA	NA	NA	NA	NA	NA	NA	NA	NA	NA	NA	NA
36	Nudiviridae	Cluster10014	8	scaffold_7873:11020-12280(-):Ganaspis_ganaspis	Ganaspis_ganaspis	scaffold_7873_11020-12280_-__Ganaspis_ganaspis	scaffold_7873:Ganaspis_ganaspis	NA	NA	NA	NA	NA	NA	YP_009116744	NA	77064	scaffold_7873:Ganaspis_ganaspis	NA	1	18.1	403	328	0	18	420	202	602	8.063e-11	69	642	1546257	unclassified_Nudiviridae	Tipula_oleracea_nudivirus	NA	Nudiviridae	Nudiviridae	Viruses	NA	NA	NA	NA	NA	NA	NA	NA	NA	NA	NA	NA
212	Nudiviridae	Cluster10014	16	scaffold_867:29416-31576(+):Aphidius_colemani	Aphidius_colemani	scaffold_867_29416-31576_+__Aphidius_colemani	scaffold_867:Aphidius_colemani	NA	NA	NA	56	317.479	317.479	YP_009116744	NA	92318	scaffold_867:Aphidius_colemani	NA	4	18.5	675	498	0	27	701	1	612	5.771e-26	120	642	1546257	unclassified_Nudiviridae	Tipula_oleracea_nudivirus	NA	Nudiviridae	Nudiviridae	Viruses	NA	NA	NA	NA	NA	NA	NA	NA	NA	NA	NA	NA
212	Nudiviridae	Cluster10014	3	scaffold_5663:1089-2250(+):Aphidius_colemani	Aphidius_colemani	scaffold_5663_1089-2250_+__Aphidius_colemani	scaffold_5663:Aphidius_colemani	NA	NA	NA	2	21.0865	21.0865	YP_009116744	NA	98406	scaffold_5663:Aphidius_colemani	NA	0	17.9	399	317	0	1	387	2	400	4.812e-10	66	642	1546257	unclassified_Nudiviridae	Tipula_oleracea_nudivirus	NA	Nudiviridae	Nudiviridae	Viruses	NA	NA	NA	NA	NA	NA	NA	NA	NA	NA	NA	NA
169	Nudiviridae	Cluster10014	19	scaffold_5043:4318-5323(-):Platygaster_orseoliae	Platygaster_orseoliae	scaffold_5043_4318-5323_-__Platygaster_orseoliae	scaffold_5043:Platygaster_orseoliae	NA	NA	NA	NA	NA	NA	YP_009116744	NA	54353	scaffold_5043:Platygaster_orseoliae	NA	2	29.5	243	166	0	1	243	125	361	3.64e-24	109	642	1546257	unclassified_Nudiviridae	Tipula_oleracea_nudivirus	NA	Nudiviridae	Baculoviridae	Viruses	NA	NA	NA	NA	NA	NA	NA	NA	NA	NA	NA	NA
104	Baculoviridae	Cluster10014	2	MVJL01011278.1:58235-60425(+):Macrocentrus_cingulum	Macrocentrus_cingulum	MVJL01011278.1_58235-60425_+__Macrocentrus_cingulum	MVJL01011278.1:Macrocentrus_cingulum	NA	NA	NA	NA	NA	NA	YP_003422388	NA	12085	MVJL01011278.1:Macrocentrus_cingulum	NA	1	18.2	722	425	0	2	723	41	561	1.12e-26	122	571	36355	Pseudalatia_unipuncta_granulovirus	Mythimna_unipuncta_granulovirus_A	Betabaculovirus	Baculoviridae	Baculoviridae	Viruses	NA	NA	NA	NA	NA	NA	NA	NA	NA	NA	NA	NA
104	Baculoviridae	Cluster10014	20	MVJL01000523.1_2-HSPs_+__Macrocentrus_cingulum	Macrocentrus_cingulum	MVJL01000523.1_2-HSPs_+__Macrocentrus_cingulum	MVJL01000523.1:Macrocentrus_cingulum	1	NA	NA	NA	NA	NA	YP_001649139	NA	11702	MVJL01000523.1:Macrocentrus_cingulum	1	23	28.7	174	116	0	1	174	94	257	1.015e-14	76	576	489830	NA	Helicoverpa_armigera_granulovirus	Betabaculovirus	Baculoviridae	Baculoviridae	Viruses	NA	NA	NA	NA	NA	NA	NA	NA	NA	NA	NA	NA
104	Baculoviridae	Cluster10014	20	MVJL01006060.1:119538-120324(-):Macrocentrus_cingulum	Macrocentrus_cingulum	MVJL01006060.1_119538-120324_-__Macrocentrus_cingulum	MVJL01006060.1:Macrocentrus_cingulum	NA	NA	NA	NA	NA	NA	YP_762389	NA	61959	MVJL01006060.1:Macrocentrus_cingulum	NA	5	28.1	173	106	0	90	262	124	271	6.543e-13	73	564	113370	NA	Spodoptera_frugiperda_ascovirus_1a	Ascovirus	Ascoviridae	Baculoviridae	Viruses	NA	NA	NA	NA	NA	NA	NA	NA	NA	NA	NA	NA
104	Baculoviridae	Cluster10014	20	MVJL01007477.1:55075-55426(-):Macrocentrus_cingulum	Macrocentrus_cingulum	MVJL01007477.1_55075-55426_-__Macrocentrus_cingulum	MVJL01007477.1:Macrocentrus_cingulum	NA	NA	NA	NA	NA	NA	NP_689193	NA	62321	MVJL01007477.1:Macrocentrus_cingulum	NA	2	40.5	84	49	0	4	86	186	269	7.599e-11	62	301	204440	NA	Mamestra_configurata_nucleopolyhedrovirus_B	Alphabaculovirus	Baculoviridae	Baculoviridae	Viruses	NA	NA	NA	NA	NA	NA	NA	NA	NA	NA	NA	NA
104	Baculoviridae	Cluster10014	20	MVJL01007816.1:6495-6873(-):Macrocentrus_cingulum	Macrocentrus_cingulum	MVJL01007816.1_6495-6873_-__Macrocentrus_cingulum	MVJL01007816.1:Macrocentrus_cingulum	NA	NA	NA	NA	NA	NA	NP_689193	NA	62360	MVJL01007816.1:Macrocentrus_cingulum	NA	1	37.5	96	59	0	1	95	174	269	3.005e-11	64	301	204440	NA	Mamestra_configurata_nucleopolyhedrovirus_B	Alphabaculovirus	Baculoviridae	Baculoviridae	Viruses	NA	NA	NA	NA	NA	NA	NA	NA	NA	NA	NA	NA
104	Baculoviridae	Cluster10014	21	MVJL01001975.1:16215-17064(-):Macrocentrus_cingulum	Macrocentrus_cingulum	MVJL01001975.1_16215-17064_-__Macrocentrus_cingulum	MVJL01001975.1:Macrocentrus_cingulum	NA	NA	NA	NA	NA	NA	YP_009506113	NA	61808	MVJL01001975.1:Macrocentrus_cingulum	NA	2	21.7	267	164	0	5	271	46	256	9.854e-12	70	571	1916701	Trichoplusia_ni_granulovirus_LBIV-12	Trichoplusia_ni_granulovirus	Betabaculovirus	Baculoviridae	Baculoviridae	Viruses	NA	NA	NA	NA	NA	NA	NA	NA	NA	NA	NA	NA
104	Baculoviridae	Cluster10014	21	MVJL01006696.1:67833-69924(+):Macrocentrus_cingulum	Macrocentrus_cingulum	MVJL01006696.1_67833-69924_+__Macrocentrus_cingulum	MVJL01006696.1:Macrocentrus_cingulum	NA	NA	NA	NA	NA	NA	YP_009506113	NA	62276	MVJL01006696.1:Macrocentrus_cingulum	NA	10	16.6	697	413	0	1	697	58	553	2.765e-17	91	571	1916701	Trichoplusia_ni_granulovirus_LBIV-12	Trichoplusia_ni_granulovirus	Betabaculovirus	Baculoviridae	Baculoviridae	Viruses	NA	NA	NA	NA	NA	NA	NA	NA	NA	NA	NA	NA
104	Baculoviridae	Cluster10014	21	MVJL01011943.1:3448-3979(+):Macrocentrus_cingulum	Macrocentrus_cingulum	MVJL01011943.1_3448-3979_+__Macrocentrus_cingulum	MVJL01011943.1:Macrocentrus_cingulum	NA	NA	NA	NA	NA	NA	AJP09145	NA	62691	MVJL01011943.1:Macrocentrus_cingulum	NA	1	28.3	144	88	0	50	173	129	272	5.063e-10	62	312	328614	Heliothis_virescens_ascovirus_3f	Heliothis_virescens_ascovirus_3a	Ascovirus	Ascoviridae	Baculoviridae	Viruses	NA	NA	NA	NA	NA	NA	NA	NA	NA	NA	NA	NA
104	Baculoviridae	Cluster10014	22	MVJL01005245.1:114456-114771(+):Macrocentrus_cingulum	Macrocentrus_cingulum	MVJL01005245.1_114456-114771_+__Macrocentrus_cingulum	MVJL01005245.1:Macrocentrus_cingulum	NA	NA	NA	NA	NA	NA	NP_689193	NA	61926	MVJL01005245.1:Macrocentrus_cingulum	NA	6	37.7	98	60	0	1	97	171	268	3.806e-12	65	301	204440	NA	Mamestra_configurata_nucleopolyhedrovirus_B	Alphabaculovirus	Baculoviridae	Baculoviridae	Viruses	NA	NA	NA	NA	NA	NA	NA	NA	NA	NA	NA	NA
104	Baculoviridae	Cluster10014	22	MVJL01005245.1:120651-120990(-):Macrocentrus_cingulum	Macrocentrus_cingulum	MVJL01005245.1_120651-120990_-__Macrocentrus_cingulum	MVJL01005245.1:Macrocentrus_cingulum	NA	NA	NA	NA	NA	NA	NP_689193	NA	61880	MVJL01005245.1:Macrocentrus_cingulum	NA	6	38	98	60	0	9	105	171	268	2.783e-12	66	301	204440	NA	Mamestra_configurata_nucleopolyhedrovirus_B	Alphabaculovirus	Baculoviridae	Baculoviridae	Viruses	NA	NA	NA	NA	NA	NA	NA	NA	NA	NA	NA	NA
104	Baculoviridae	Cluster10412	1	MVJL01007279.1:87108-87726(+):Macrocentrus_cingulum	Macrocentrus_cingulum	MVJL01007279.1_87108-87726_+__Macrocentrus_cingulum	MVJL01007279.1:Macrocentrus_cingulum	1	NA	NA	NA	NA	NA	YP_008378416	NA	12050	MVJL01007279.1:Macrocentrus_cingulum	1	18	28.6	138	98	0	37	174	31	168	2.491e-09	61	249	58094	NA	Choristoneura_rosaceana_nucleopolyhedrovirus	Alphabaculovirus	Baculoviridae	Baculoviridae	Viruses	NA	NA	NA	NA	NA	NA	NA	NA	NA	NA	NA	NA
104	Baculoviridae	Cluster4844	3	MVJL01005309.1:15570-16452(-):Macrocentrus_cingulum	Macrocentrus_cingulum	MVJL01005309.1_15570-16452_-__Macrocentrus_cingulum	MVJL01005309.1:Macrocentrus_cingulum	NA	NA	NA	NA	NA	NA	YP_001649002	NA	61930	MVJL01005309.1:Macrocentrus_cingulum	NA	7	42.6	298	168	0	2	294	1	298	2.503e-64	226	824	489830	NA	Helicoverpa_armigera_granulovirus	Betabaculovirus	Baculoviridae	Baculoviridae	Viruses	NA	NA	NA	NA	NA	NA	NA	NA	NA	NA	NA	NA
356	Nudiviridae	Cluster10014	25	scaffold_31600:1793-2621(-):Ganaspis_ganaspis	Ganaspis_ganaspis	scaffold_31600_1793-2621_-__Ganaspis_ganaspis	scaffold_31600:Ganaspis_ganaspis	NA	NA	NA	NA	NA	NA	YP_009116744	NA	97103	scaffold_31600:Ganaspis_ganaspis	NA	0	24.7	269	177	0	35	270	344	612	2.813e-18	90	642	1546257	unclassified_Nudiviridae	Tipula_oleracea_nudivirus	NA	Nudiviridae	Nudiviridae	Viruses	NA	NA	NA	NA	NA	NA	NA	NA	NA	NA	NA	NA
356	Nudiviridae	Cluster10014	25	scaffold_55695_1:1437-1953(-):Ganaspis_brasiliensis	Ganaspis_brasiliensis	scaffold_55695_1_1437-1953_-__Ganaspis_brasiliensis	scaffold_55695_1:Ganaspis_brasiliensis	NA	NA	NA	NA	NA	NA	YP_009116744	NA	77250	scaffold_55695_1:Ganaspis_brasiliensis	NA	1	25.6	172	118	0	1	172	460	618	3.259e-10	63	642	1546257	unclassified_Nudiviridae	Tipula_oleracea_nudivirus	NA	Nudiviridae	Nudiviridae	Viruses	NA	NA	NA	NA	NA	NA	NA	NA	NA	NA	NA	NA
276	Baculoviridae	Cluster10025	1	scaffold_3730:6-537(+):Campopleginae	Campopleginae	scaffold_3730_6-537_+__Campopleginae	scaffold_3730:Campopleginae	NA	NA	NA	NA	NA	NA	NP_258394	NA	171455	scaffold_3730:Campopleginae	NA	0	21.6	217	136	0	1	175	217	433	2.727e-08	57	456	46242	NA	Spodoptera_litura_nucleopolyhedrovirus	Alphabaculovirus	Baculoviridae	Baculoviridae	Viruses	NA	NA	NA	NA	NA	NA	NA	NA	NA	NA	NA	NA
4	LbFV_like	Cluster10416	1	scaffold_19885:329-629(-):Eretmocerus_eremicus	Eretmocerus_eremicus	scaffold_19885_329-629_-__Eretmocerus_eremicus	scaffold_19885:Eretmocerus_eremicus	NA	NA	NA	NA	NA	NA	YP_009345623	NA	155923	scaffold_19885:Eretmocerus_eremicus	NA	0	38.3	100	59	0	1	100	53	149	3.378e-13	68	226	552509	unclassified_viruses	Leptopilina_boulardi_filamentous_virus	NA	LbFV_like	LbFV_like	Viruses	NA	NA	NA	NA	NA	NA	NA	NA	NA	NA	NA	NA
175	LbFV_like	Cluster10014	23	scaffold_15031:3585-5052(-):Platygaster_orseoliae	Platygaster_orseoliae	scaffold_15031_3585-5052_-__Platygaster_orseoliae	scaffold_15031:Platygaster_orseoliae	NA	NA	NA	NA	NA	NA	YP_009506113	NA	97531	scaffold_15031:Platygaster_orseoliae	NA	0	25.9	488	314	0	1	488	131	555	5.659e-44	173	571	1916701	Trichoplusia_ni_granulovirus_LBIV-12	Trichoplusia_ni_granulovirus	Betabaculovirus	Baculoviridae	Baculoviridae	Viruses	NA	NA	NA	NA	NA	NA	NA	NA	NA	NA	NA	NA
175	LbFV_like	Cluster10014	23	scaffold_6401_2-HSPs_-__Platygaster_orseoliae	Platygaster_orseoliae	scaffold_6401_2-HSPs_-__Platygaster_orseoliae	scaffold_6401:Platygaster_orseoliae	1	NA	NA	NA	NA	NA	YP_001110890	NA	54501	scaffold_6401:Platygaster_orseoliae	1	1	30.3	174	113	0	1	174	404	566	6.421e-17	83	608	260797	Heliothis_virescens_ascovirus_3e	Heliothis_virescens_ascovirus_3a	Ascovirus	Ascoviridae	Baculoviridae	Viruses	NA	NA	NA	NA	NA	NA	NA	NA	NA	NA	NA	NA
175	LbFV_like	Cluster10014	23	scaffold_7821:1290-3111(-):Platygaster_orseoliae	Platygaster_orseoliae	scaffold_7821_1290-3111_-__Platygaster_orseoliae	scaffold_7821:Platygaster_orseoliae	NA	NA	NA	NA	NA	NA	YP_009506113	NA	98055	scaffold_7821:Platygaster_orseoliae	NA	0	24.1	584	386	0	1	584	46	555	8.944e-46	181	571	1916701	Trichoplusia_ni_granulovirus_LBIV-12	Trichoplusia_ni_granulovirus	Betabaculovirus	Baculoviridae	Baculoviridae	Viruses	NA	NA	NA	NA	NA	NA	NA	NA	NA	NA	NA	NA
175	LbFV_like	Cluster10416	3	scaffold_7821:12681-13122(+):Platygaster_orseoliae	Platygaster_orseoliae	scaffold_7821_12681-13122_+__Platygaster_orseoliae	scaffold_7821:Platygaster_orseoliae	NA	NA	NA	NA	NA	NA	YP_009345623	NA	98092	scaffold_7821:Platygaster_orseoliae	NA	0	37	143	84	0	5	147	52	186	1.825e-20	91	226	552509	unclassified_viruses	Leptopilina_boulardi_filamentous_virus	NA	LbFV_like	LbFV_like	Viruses	NA	NA	NA	NA	NA	NA	NA	NA	NA	NA	NA	NA
175	LbFV_like	Cluster10416	4	scaffold_983:9780-10269(+):Platygaster_orseoliae	Platygaster_orseoliae	scaffold_983_9780-10269_+__Platygaster_orseoliae	scaffold_983:Platygaster_orseoliae	NA	NA	NA	NA	NA	NA	YP_009345623	NA	97048	scaffold_983:Platygaster_orseoliae	NA	0	32.4	163	108	0	3	163	58	220	2.646e-18	86	226	552509	unclassified_viruses	Leptopilina_boulardi_filamentous_virus	NA	LbFV_like	LbFV_like	Viruses	NA	NA	NA	NA	NA	NA	NA	NA	NA	NA	NA	NA
175	LbFV_like	Cluster1043	1	scaffold_3866:14985-15276(-):Platygaster_orseoliae	Platygaster_orseoliae	scaffold_3866_14985-15276_-__Platygaster_orseoliae	scaffold_3866:Platygaster_orseoliae	1	NA	NA	NA	NA	NA	QKN22494.1	NA	146945	scaffold_3866:Platygaster_orseoliae	1	0	36	89	56	0	9	97	188	276	3.987e-09	56	279	NA	NA	Drosophila-associated filamentous virus	NA	LbFV_like	LbFV_like	NA	NA	NA	NA	NA	NA	NA	NA	NA	NA	NA	NA	NA
175	LbFV_like	Cluster12537	1	scaffold_8315:9507-10299(-):Platygaster_orseoliae	Platygaster_orseoliae	scaffold_8315_9507-10299_-__Platygaster_orseoliae	scaffold_8315:Platygaster_orseoliae	NA	NA	NA	NA	NA	NA	QKN22505.1	NA	112818	scaffold_8315:Platygaster_orseoliae	NA	0	36.3	268	168	0	1	264	5	272	2.364e-43	163	302	NA	NA	Drosophila-associated filamentous virus	NA	LbFV_like	LbFV_like	NA	NA	NA	NA	NA	NA	NA	NA	NA	NA	NA	NA	NA
175	LbFV_like	Cluster12545	2	scaffold_32496:22-736(+):Platygaster_orseoliae	Platygaster_orseoliae	scaffold_32496_22-736_+__Platygaster_orseoliae	scaffold_32496:Platygaster_orseoliae	NA	NA	NA	NA	NA	NA	YP_009345641	NA	164269	scaffold_32496:Platygaster_orseoliae	NA	0	30.9	238	152	0	1	238	12	232	3.065e-27	115	232	552509	unclassified_viruses	Leptopilina_boulardi_filamentous_virus	NA	LbFV_like	LbFV_like	Viruses	NA	NA	NA	NA	NA	NA	NA	NA	NA	NA	NA	NA
175	LbFV_like	Cluster12545	3	scaffold_18363:3280-3964(+):Platygaster_orseoliae	Platygaster_orseoliae	scaffold_18363_3280-3964_+__Platygaster_orseoliae	scaffold_18363:Platygaster_orseoliae	NA	NA	NA	NA	NA	NA	YP_009345641	NA	104869	scaffold_18363:Platygaster_orseoliae	NA	0	28.8	226	150	0	3	228	15	226	1.367e-21	98	232	552509	unclassified_viruses	Leptopilina_boulardi_filamentous_virus	NA	LbFV_like	LbFV_like	Viruses	NA	NA	NA	NA	NA	NA	NA	NA	NA	NA	NA	NA
175	LbFV_like	Cluster15514	1	scaffold_64707:757-1639(-):Platygaster_orseoliae	Platygaster_orseoliae	scaffold_64707_757-1639_-__Platygaster_orseoliae	scaffold_64707:Platygaster_orseoliae	NA	NA	NA	NA	NA	NA	YP_009345685	NA	170394	scaffold_64707:Platygaster_orseoliae	NA	0	23.2	294	203	0	1	294	262	526	3.308e-17	87	536	552509	unclassified_viruses	Leptopilina_boulardi_filamentous_virus	NA	LbFV_like	LbFV_like	Viruses	NA	NA	NA	NA	NA	NA	NA	NA	NA	NA	NA	NA
175	LbFV_like	Cluster15514	2	scaffold_6401:19598-20432(-):Platygaster_orseoliae	Platygaster_orseoliae	scaffold_6401_19598-20432_-__Platygaster_orseoliae	scaffold_6401:Platygaster_orseoliae	1	NA	NA	NA	NA	NA	YP_009345685	NA	54540	scaffold_6401:Platygaster_orseoliae	1	1	25.5	293	206	0	1	278	228	520	9.608e-23	103	536	552509	unclassified_viruses	Leptopilina_boulardi_filamentous_virus	NA	LbFV_like	LbFV_like	Viruses	NA	NA	NA	NA	NA	NA	NA	NA	NA	NA	NA	NA
175	LbFV_like	Cluster17071	1	scaffold_10234:1103-2327(+):Platygaster_orseoliae	Platygaster_orseoliae	scaffold_10234_1103-2327_+__Platygaster_orseoliae	scaffold_10234:Platygaster_orseoliae	NA	NA	NA	NA	NA	NA	YP_009345706	NA	43449	scaffold_10234:Platygaster_orseoliae	NA	0	21.9	408	267	0	1	408	6	348	5.504e-23	107	360	552509	unclassified_viruses	Leptopilina_boulardi_filamentous_virus	NA	LbFV_like	LbFV_like	Viruses	NA	NA	NA	NA	NA	NA	NA	NA	NA	NA	NA	NA
175	LbFV_like	Cluster17683	2	scaffold_4493:4048-5731(-):Platygaster_orseoliae	Platygaster_orseoliae	scaffold_4493_4048-5731_-__Platygaster_orseoliae	scaffold_4493:Platygaster_orseoliae	NA	NA	NA	NA	NA	NA	YP_009506121	NA	54313	scaffold_4493:Platygaster_orseoliae	NA	3	20.8	558	391	0	1	558	38	532	1.961e-29	130	691	1916701	Trichoplusia_ni_granulovirus_LBIV-12	Trichoplusia_ni_granulovirus	Betabaculovirus	Baculoviridae	Baculoviridae	Viruses	NA	NA	NA	NA	NA	NA	NA	NA	NA	NA	NA	NA
175	LbFV_like	Cluster20069	2	scaffold_7180:1612-4084(-):Platygaster_orseoliae	Platygaster_orseoliae	scaffold_7180_1612-4084_-__Platygaster_orseoliae	scaffold_7180:Platygaster_orseoliae	NA	NA	NA	NA	NA	NA	YP_009345682.1_CP_Varaldi-leptopilina	NA	146195	scaffold_7180:Platygaster_orseoliae	NA	0	26.2	656	396	0	167	822	130	667	4.699e-62	236	676	552509	unclassified_viruses	Leptopilina_boulardi_filamentous_virus	NA	LbFV_like	LbFV_like	Viruses	NA	NA	NA	NA	NA	NA	NA	NA	NA	NA	NA	NA
175	LbFV_like	Cluster20069	3	scaffold_6401:17630-18491(+):Platygaster_orseoliae	Platygaster_orseoliae	scaffold_6401_17630-18491_+__Platygaster_orseoliae	scaffold_6401:Platygaster_orseoliae	1	NA	NA	NA	NA	NA	QKN22481.1	NA	54536	scaffold_6401:Platygaster_orseoliae	1	1	21.9	286	212	0	15	286	328	613	9.203e-14	76	617	NA	NA	Drosophila-associated filamentous virus	NA	LbFV_like	LbFV_like	NA	NA	NA	NA	NA	NA	NA	NA	NA	NA	NA	NA	NA
175	LbFV_like	Cluster20217	13	scaffold_3020:1970-4034(+):Platygaster_orseoliae	Platygaster_orseoliae	scaffold_3020_1970-4034_+__Platygaster_orseoliae	scaffold_3020:Platygaster_orseoliae	1	NA	NA	NA	NA	NA	QKN22456.1	NA	54243	scaffold_3020:Platygaster_orseoliae	1	1	30.5	574	360	0	2	575	15	533	3.674e-73	267	769	NA	NA	Drosophila-associated filamentous virus	NA	LbFV_like	LbFV_like	NA	NA	NA	NA	NA	NA	NA	NA	NA	NA	NA	NA	NA
175	LbFV_like	Cluster21657	3	scaffold_10234:3641-4645(+):Platygaster_orseoliae	Platygaster_orseoliae	scaffold_10234_3641-4645_+__Platygaster_orseoliae	scaffold_10234:Platygaster_orseoliae	NA	NA	NA	NA	NA	NA	YP_009345664.1_CP_Varaldi-leptopilina	NA	43444	scaffold_10234:Platygaster_orseoliae	NA	0	32.1	166	109	0	2	167	3	164	1.153e-16	86	362	552509	unclassified_viruses	Leptopilina_boulardi_filamentous_virus	NA	LbFV_like	LbFV_like	Viruses	NA	NA	NA	NA	NA	NA	NA	NA	NA	NA	NA	NA
175	LbFV_like	Cluster21657	3	scaffold_84473:914-1241(+):Platygaster_orseoliae	Platygaster_orseoliae	scaffold_84473_914-1241_+__Platygaster_orseoliae	scaffold_84473:Platygaster_orseoliae	NA	NA	NA	NA	NA	NA	AQQ79980	NA	170043	scaffold_84473:Platygaster_orseoliae	NA	0	30	112	75	0	2	109	3	114	4.225e-08	54	362	552509	unclassified_viruses	Leptopilina_boulardi_filamentous_virus	NA	LbFV_like	LbFV_like	Viruses	NA	NA	NA	NA	NA	NA	NA	NA	NA	NA	NA	NA
175	LbFV_like	Cluster23517	1	scaffold_32496:1111-1966(+):Platygaster_orseoliae	Platygaster_orseoliae	scaffold_32496_1111-1966_+__Platygaster_orseoliae	scaffold_32496:Platygaster_orseoliae	NA	NA	NA	NA	NA	NA	YP_009345624	NA	164357	scaffold_32496:Platygaster_orseoliae	NA	0	23.3	234	177	0	1	234	94	325	5.622e-12	71	382	552509	unclassified_viruses	Leptopilina_boulardi_filamentous_virus	NA	LbFV_like	LbFV_like	Viruses	NA	NA	NA	NA	NA	NA	NA	NA	NA	NA	NA	NA
175	LbFV_like	Cluster23517	2	scaffold_48333_0:87-657(+):Platygaster_orseoliae	Platygaster_orseoliae	scaffold_48333_0_87-657_+__Platygaster_orseoliae	scaffold_48333_0:Platygaster_orseoliae	NA	NA	NA	NA	NA	NA	YP_009345624	NA	171453	scaffold_48333_0:Platygaster_orseoliae	NA	0	25.1	171	127	0	5	174	160	330	3.22e-09	60	382	552509	unclassified_viruses	Leptopilina_boulardi_filamentous_virus	NA	LbFV_like	LbFV_like	Viruses	NA	NA	NA	NA	NA	NA	NA	NA	NA	NA	NA	NA
175	LbFV_like	Cluster25710	2	scaffold_15031:5725-6763(+):Platygaster_orseoliae	Platygaster_orseoliae	scaffold_15031_5725-6763_+__Platygaster_orseoliae	scaffold_15031:Platygaster_orseoliae	NA	NA	NA	NA	NA	NA	YP_009345606	NA	97555	scaffold_15031:Platygaster_orseoliae	NA	0	24.7	346	246	0	1	346	4	331	9.084e-26	114	334	552509	unclassified_viruses	Leptopilina_boulardi_filamentous_virus	NA	LbFV_like	LbFV_like	Viruses	NA	NA	NA	NA	NA	NA	NA	NA	NA	NA	NA	NA
175	LbFV_like	Cluster25710	2	scaffold_18363:299-734(-):Platygaster_orseoliae	Platygaster_orseoliae	scaffold_18363_299-734_-__Platygaster_orseoliae	scaffold_18363:Platygaster_orseoliae	NA	NA	NA	NA	NA	NA	YP_009345606	NA	104867	scaffold_18363:Platygaster_orseoliae	NA	0	27.3	140	86	0	6	145	174	292	8.422e-09	57	334	552509	unclassified_viruses	Leptopilina_boulardi_filamentous_virus	NA	LbFV_like	LbFV_like	Viruses	NA	NA	NA	NA	NA	NA	NA	NA	NA	NA	NA	NA
175	LbFV_like	Cluster26675	3	scaffold_17380:961-1714(-):Platygaster_orseoliae	Platygaster_orseoliae	scaffold_17380_961-1714_-__Platygaster_orseoliae	scaffold_17380:Platygaster_orseoliae	NA	NA	NA	NA	NA	NA	YP_009345689.1_CP_Varaldi-leptopilina	NA	151696	scaffold_17380:Platygaster_orseoliae	NA	0	26.8	243	153	0	9	251	4	213	1.019e-19	93	215	552509	unclassified_viruses	Leptopilina_boulardi_filamentous_virus	NA	LbFV_like	LbFV_like	Viruses	NA	NA	NA	NA	NA	NA	NA	NA	NA	NA	NA	NA
175	LbFV_like	Cluster27203	1	scaffold_7180:7918-9592(-):Platygaster_orseoliae	Platygaster_orseoliae	scaffold_7180_7918-9592_-__Platygaster_orseoliae	scaffold_7180:Platygaster_orseoliae	NA	NA	NA	NA	NA	NA	AQQ79978	NA	146209	scaffold_7180:Platygaster_orseoliae	NA	0	31.7	551	369	0	8	558	50	590	2.617e-76	272	1308	552509	unclassified_viruses	Leptopilina_boulardi_filamentous_virus	NA	LbFV_like	LbFV_like	Viruses	NA	NA	NA	NA	NA	NA	NA	NA	NA	NA	NA	NA
175	LbFV_like	Cluster3614	1	scaffold_8315:2760-3849(+):Platygaster_orseoliae	Platygaster_orseoliae	scaffold_8315_2760-3849_+__Platygaster_orseoliae	scaffold_8315:Platygaster_orseoliae	NA	NA	NA	NA	NA	NA	QKN22506.1	NA	112216	scaffold_8315:Platygaster_orseoliae	NA	0	27.7	255	176	0	119	363	176	430	5.383e-22	103	727	NA	NA	Drosophila-associated filamentous virus	NA	LbFV_like	LbFV_like	NA	NA	NA	NA	NA	NA	NA	NA	NA	NA	NA	NA	NA
175	LbFV_like	Cluster5269	1	scaffold_3020:13463-14417(+):Platygaster_orseoliae	Platygaster_orseoliae	scaffold_3020_13463-14417_+__Platygaster_orseoliae	scaffold_3020:Platygaster_orseoliae	1	NA	NA	NA	NA	NA	YP_009345647	NA	54245	scaffold_3020:Platygaster_orseoliae	1	1	21.7	318	231	0	1	318	10	305	1.746e-15	82	336	552509	unclassified_viruses	Leptopilina_boulardi_filamentous_virus	NA	LbFV_like	LbFV_like	Viruses	NA	NA	NA	NA	NA	NA	NA	NA	NA	NA	NA	NA
175	LbFV_like	Cluster8973	2	scaffold_15031:513-1767(+):Platygaster_orseoliae	Platygaster_orseoliae	scaffold_15031_513-1767_+__Platygaster_orseoliae	scaffold_15031:Platygaster_orseoliae	NA	NA	NA	NA	NA	NA	YP_009345711.1_CP_Varaldi-leptopilina	NA	97557	scaffold_15031:Platygaster_orseoliae	NA	0	17.6	418	337	0	1	418	213	622	5.75e-10	66	625	552509	unclassified_viruses	Leptopilina_boulardi_filamentous_virus	NA	LbFV_like	LbFV_like	Viruses	NA	NA	NA	NA	NA	NA	NA	NA	NA	NA	NA	NA
29	Nudiviridae	Cluster10416	5	NW_011887829.1:50189-51005(-):Fopius_arisanus	Fopius_arisanus	NW_011887829.1_50189-51005_-__Fopius_arisanus	NW_011887829.1:Fopius_arisanus	4	NA	NA	514	687.866	687.866	YP_002321398	NA	18500	NW_011887829.1:Fopius_arisanus	4	47	50.1	271	133	0	1	271	12	278	2.227e-74	254	279	92521	NA	Oryctes_rhinoceros_nudivirus	Alphanudivirus	Nudiviridae	Nudiviridae	Viruses	NA	NA	NA	NA	NA	NA	NA	NA	NA	NA	NA	NA
29	Nudiviridae	Cluster10771	1	NW_011887765.1_0:915560-916097(+):Fopius_arisanus	Fopius_arisanus	NW_011887765.1_0_915560-916097_+__Fopius_arisanus	NW_011887765.1_0:Fopius_arisanus	2	NA	NA	326	662.518	662.518	YP_009553079	NA	17990	NW_011887765.1_0:Fopius_arisanus	2	127	52.1	166	78	0	9	172	11	176	2.518e-45	165	192	2057187	unclassified_Nudiviridae	Drosophila_innubila_nudivirus	NA	Nudiviridae	Nudiviridae	Viruses	NA	NA	NA	NA	NA	NA	NA	NA	NA	NA	NA	NA
29	Nudiviridae	Cluster10833	1	NW_011887765.1_0:651603-654312(+):Fopius_arisanus	Fopius_arisanus	NW_011887765.1_0_651603-654312_+__Fopius_arisanus	NW_011887765.1_0:Fopius_arisanus	2	NA	NA	654	263.858	263.858	AKH40378.1_CP_Burke-fopius	NA	17998	NW_011887765.1_0:Fopius_arisanus	2	127	63.1	878	320	0	1	878	1	867	0	1086	908	1654582	unclassified_Nudiviridae	Kallithea_virus	NA	Nudiviridae	Nudiviridae	Viruses	NA	NA	NA	NA	NA	NA	NA	NA	NA	NA	NA	NA
29	Nudiviridae	Cluster11092	2	NW_011887765.1_0:910246-910567(+):Fopius_arisanus	Fopius_arisanus	NW_011887765.1_0_910246-910567_+__Fopius_arisanus	NW_011887765.1_0:Fopius_arisanus	2	NA	NA	629	2135.78	2135.78	YP_009553141	NA	18009	NW_011887765.1_0:Fopius_arisanus	2	127	37.9	107	65	0	1	107	1	106	2.621e-14	72	127	2057187	unclassified_Nudiviridae	Drosophila_innubila_nudivirus	NA	Nudiviridae	Nudiviridae	Viruses	NA	NA	NA	NA	NA	NA	NA	NA	NA	NA	NA	NA
29	Nudiviridae	Cluster11238	2	NW_011887740.1_0:5197607-5198192(+):Fopius_arisanus	Fopius_arisanus	NW_011887740.1_0_5197607-5198192_+__Fopius_arisanus	NW_011887740.1_0:Fopius_arisanus	9	NA	NA	170	317.186	317.186	YP_009553083	NA	17897	NW_011887740.1_0:Fopius_arisanus	9	387	35.7	213	125	0	1	195	6	218	4.413e-32	127	219	2057187	unclassified_Nudiviridae	Drosophila_innubila_nudivirus	NA	Nudiviridae	Nudiviridae	Viruses	NA	NA	NA	NA	NA	NA	NA	NA	NA	NA	NA	NA
29	Nudiviridae	Cluster11455	1	NW_011887808.1:559108-559969(-):Fopius_arisanus	Fopius_arisanus	NW_011887808.1_559108-559969_-__Fopius_arisanus	NW_011887808.1:Fopius_arisanus	8	NA	NA	150	190.26	190.26	YP_002321356	NA	18117	NW_011887808.1:Fopius_arisanus	8	58	45.3	310	156	0	1	287	4	313	2.184e-74	254	323	92521	NA	Oryctes_rhinoceros_nudivirus	Alphanudivirus	Nudiviridae	Nudiviridae	Viruses	NA	NA	NA	NA	NA	NA	NA	NA	NA	NA	NA	NA
29	Nudiviridae	Cluster11825	1	NW_011887829.1:140125-140284(-):Fopius_arisanus	Fopius_arisanus	NW_011887829.1_140125-140284_-__Fopius_arisanus	NW_011887829.1:Fopius_arisanus	4	NA	NA	76	519.345	519.345	YP_009553104	NA	18684	NW_011887829.1:Fopius_arisanus	4	47	61.7	50	19	0	1	50	1	50	1.72e-12	63	50	2057187	unclassified_Nudiviridae	Drosophila_innubila_nudivirus	NA	Nudiviridae	Nudiviridae	Viruses	NA	NA	NA	NA	NA	NA	NA	NA	NA	NA	NA	NA
29	Nudiviridae	Cluster12013	1	NW_011887808.1:560181-560682(+):Fopius_arisanus	Fopius_arisanus	NW_011887808.1_560181-560682_+__Fopius_arisanus	NW_011887808.1:Fopius_arisanus	8	NA	NA	152	331.057	331.057	YP_009553399	NA	18123	NW_011887808.1:Fopius_arisanus	8	58	33	158	103	0	1	155	3	160	4.154e-18	85	189	2053981	unclassified_Nudiviridae	Tomelloso_virus	NA	Nudiviridae	Nudiviridae	Viruses	NA	NA	NA	NA	NA	NA	NA	NA	NA	NA	NA	NA
29	Nudiviridae	Cluster12087	2	NW_011887825.1:465242-465473(+):Fopius_arisanus	Fopius_arisanus	NW_011887825.1_465242-465473_+__Fopius_arisanus	NW_011887825.1:Fopius_arisanus	1	NA	NA	237	1116.92	1116.92	YP_002321363.1_CP_Burke-fopius	NA	18157	NW_011887825.1:Fopius_arisanus	1	28	51.7	77	36	0	1	77	1	76	5.952e-17	78	78	92521	NA	Oryctes_rhinoceros_nudivirus	Alphanudivirus	Nudiviridae	Nudiviridae	Viruses	NA	NA	NA	NA	NA	NA	NA	NA	NA	NA	NA	NA
29	Nudiviridae	Cluster15164	3	NW_011887825.1_2-HSPs_+__Fopius_arisanus	Fopius_arisanus	NW_011887825.1_2-HSPs_+__Fopius_arisanus	NW_011887825.1:Fopius_arisanus	1	NA	NA	NA	NA	NA	AJZ73131.1_CP_Burke-fopius	NA	18139	NW_011887825.1:Fopius_arisanus	1	28	50.3	454	224	0	3	456	24	475	3.797e-130	424	631	32260	cellular_organisms	Venturia_canescens	Venturia	Nudiviridae	Nudiviridae	Eukaryota	Campopleginae	Ichneumonoidea	Parasitoida	Apocrita	Hymenoptera	Holometabola	Neoptera	Pterygota	Insecta	Hexapoda	Arthropoda	Metazoa
29	Nudiviridae	Cluster16413	1	NW_011887740.1_1:242838-244503(-):Fopius_arisanus	Fopius_arisanus	NW_011887740.1_1_242838-244503_-__Fopius_arisanus	NW_011887740.1_1:Fopius_arisanus	2	NA	NA	667	437.737	437.737	YP_009553068	NA	17916	NW_011887740.1_1:Fopius_arisanus	2	38	42	554	320	0	1	554	1	552	4.49e-123	409	553	2057187	unclassified_Nudiviridae	Drosophila_innubila_nudivirus	NA	Nudiviridae	Nudiviridae	Viruses	NA	NA	NA	NA	NA	NA	NA	NA	NA	NA	NA	NA
29	Nudiviridae	Cluster1694	2	NW_011887765.1_0:655107-655815(-):Fopius_arisanus	Fopius_arisanus	NW_011887765.1_0_655107-655815_-__Fopius_arisanus	NW_011887765.1_0:Fopius_arisanus	2	NA	NA	556	857.415	857.415	ACH96204	NA	17938	NW_011887765.1_0:Fopius_arisanus	2	127	20.7	234	175	0	1	222	20	253	1.14e-07	57	290	92521	NA	Oryctes_rhinoceros_nudivirus	Alphanudivirus	Nudiviridae	Nudiviridae	Viruses	NA	NA	NA	NA	NA	NA	NA	NA	NA	NA	NA	NA
29	Nudiviridae	Cluster17609	2	NW_011887765.1_0:663068-666746(-):Fopius_arisanus	Fopius_arisanus	NW_011887765.1_0_663068-666746_-__Fopius_arisanus	NW_011887765.1_0:Fopius_arisanus	2	NA	NA	329	97.7752	97.7752	AJZ73107.1_CP_Burke-fopius	NA	18013	NW_011887765.1_0:Fopius_arisanus	2	127	38.4	1177	721	0	24	1200	16	1186	2.123e-234	764	1207	32260	cellular_organisms	Venturia_canescens	Venturia	Nudiviridae	Nudiviridae	Eukaryota	Campopleginae	Ichneumonoidea	Parasitoida	Apocrita	Hymenoptera	Holometabola	Neoptera	Pterygota	Insecta	Hexapoda	Arthropoda	Metazoa
29	Nudiviridae	Cluster17704	2	NW_011887829.1:47275-47881(+):Fopius_arisanus	Fopius_arisanus	NW_011887829.1_47275-47881_+__Fopius_arisanus	NW_011887829.1:Fopius_arisanus	4	NA	NA	144	259.38	259.38	YP_009553449	NA	18335	NW_011887829.1:Fopius_arisanus	4	47	51.2	197	95	0	2	198	5	199	8.596e-54	190	203	2053981	unclassified_Nudiviridae	Tomelloso_virus	NA	Nudiviridae	Nudiviridae	Viruses	NA	NA	NA	NA	NA	NA	NA	NA	NA	NA	NA	NA
29	Nudiviridae	Cluster18059	1	NW_011887829.1:51514-52312(-):Fopius_arisanus	Fopius_arisanus	NW_011887829.1_51514-52312_-__Fopius_arisanus	NW_011887829.1:Fopius_arisanus	4	NA	NA	912	1247.99	1247.99	YP_002321429.1_CP_Burke-fopius	NA	18637	NW_011887829.1:Fopius_arisanus	4	47	50.1	262	129	0	5	266	5	263	9.319e-72	246	263	92521	NA	Oryctes_rhinoceros_nudivirus	Alphanudivirus	Nudiviridae	Nudiviridae	Viruses	NA	NA	NA	NA	NA	NA	NA	NA	NA	NA	NA	NA
29	Nudiviridae	Cluster18349	2	NW_011887748.1_0:300818-301577(+):Fopius_arisanus	Fopius_arisanus	NW_011887748.1_0_300818-301577_+__Fopius_arisanus	NW_011887748.1_0:Fopius_arisanus	NA	NA	NA	152	218.672	218.672	YP_009345986	NA	17930	NW_011887748.1_0:Fopius_arisanus	NA	54	41.3	254	147	0	2	253	27	280	3.917e-51	185	283	1654582	unclassified_Nudiviridae	Kallithea_virus	NA	Nudiviridae	Nudiviridae	Viruses	NA	NA	NA	NA	NA	NA	NA	NA	NA	NA	NA	NA
29	Nudiviridae	Cluster19347	1	NW_011887842.1:79225-79960(+):Fopius_arisanus	Fopius_arisanus	NW_011887842.1_79225-79960_+__Fopius_arisanus	NW_011887842.1:Fopius_arisanus	NA	NA	NA	11791	17516	17516	YP_002321326.1_CP_Burke-fopius	NA	18716	NW_011887842.1:Fopius_arisanus	NA	34	46.5	244	129	0	1	244	4	245	3.603e-59	208	250	92521	NA	Oryctes_rhinoceros_nudivirus	Alphanudivirus	Nudiviridae	Nudiviridae	Viruses	NA	NA	NA	NA	NA	NA	NA	NA	NA	NA	NA	NA
29	Nudiviridae	Cluster19564	1	NW_011887828.1:172988-173381(+):Fopius_arisanus	Fopius_arisanus	NW_011887828.1_172988-173381_+__Fopius_arisanus	NW_011887828.1:Fopius_arisanus	93	NA	NA	213	591.079	591.079	AJZ73143.1_CP_Burke-fopius	NA	18316	NW_011887828.1:Fopius_arisanus	93	39	57.6	122	51	0	1	122	1	122	6.497e-37	138	136	32260	cellular_organisms	Venturia_canescens	Venturia	Nudiviridae	Nudiviridae	Eukaryota	Campopleginae	Ichneumonoidea	Parasitoida	Apocrita	Hymenoptera	Holometabola	Neoptera	Pterygota	Insecta	Hexapoda	Arthropoda	Metazoa
29	Nudiviridae	Cluster1964	10	NW_011887740.1_0:5192288-5193692(+):Fopius_arisanus	Fopius_arisanus	NW_011887740.1_0_5192288-5193692_+__Fopius_arisanus	NW_011887740.1_0:Fopius_arisanus	NA	NA	NA	236	183.653	183.653	ACH96142	NA	17723	NW_011887740.1_0:Fopius_arisanus	109	387	24.7	468	346	0	1	468	53	513	1.663e-37	153	593	92521	NA	Oryctes_rhinoceros_nudivirus	Alphanudivirus	Nudiviridae	Nudiviridae	Viruses	NA	NA	NA	NA	NA	NA	NA	NA	NA	NA	NA	NA
29	Nudiviridae	Cluster1964	10	NW_011887794.1_0:213648-215283(+):Fopius_arisanus	Fopius_arisanus	NW_011887794.1_0_213648-215283_+__Fopius_arisanus	NW_011887794.1_0:Fopius_arisanus	NA	NA	NA	247	165.073	165.073	ACH96142	NA	18088	NW_011887794.1_0:Fopius_arisanus	15	109	22.8	545	416	0	1	545	52	591	5.837e-37	153	593	92521	NA	Oryctes_rhinoceros_nudivirus	Alphanudivirus	Nudiviridae	Nudiviridae	Viruses	NA	NA	NA	NA	NA	NA	NA	NA	NA	NA	NA	NA
29	Nudiviridae	Cluster1964	10	NW_011887794.1_0:216326-218063(+):Fopius_arisanus	Fopius_arisanus	NW_011887794.1_0_216326-218063_+__Fopius_arisanus	NW_011887794.1_0:Fopius_arisanus	NA	NA	NA	655	412.054	412.054	ACH96142	NA	18094	NW_011887794.1_0:Fopius_arisanus	15	109	22	579	441	0	1	579	25	591	5.208e-36	151	593	92521	NA	Oryctes_rhinoceros_nudivirus	Alphanudivirus	Nudiviridae	Nudiviridae	Viruses	NA	NA	NA	NA	NA	NA	NA	NA	NA	NA	NA	NA
29	Nudiviridae	Cluster1964	10	NW_011887794.1_0:219696-221316(+):Fopius_arisanus	Fopius_arisanus	NW_011887794.1_0_219696-221316_+__Fopius_arisanus	NW_011887794.1_0:Fopius_arisanus	NA	NA	NA	569	383.788	383.788	ACH96142	NA	18082	NW_011887794.1_0:Fopius_arisanus	15	109	22.3	540	419	0	1	540	52	591	2.569e-34	145	593	92521	NA	Oryctes_rhinoceros_nudivirus	Alphanudivirus	Nudiviridae	Nudiviridae	Viruses	NA	NA	NA	NA	NA	NA	NA	NA	NA	NA	NA	NA
29	Nudiviridae	Cluster1971	1	NW_011887765.1_0:913894-915118(-):Fopius_arisanus	Fopius_arisanus	NW_011887765.1_0_913894-915118_-__Fopius_arisanus	NW_011887765.1_0:Fopius_arisanus	2	NA	NA	171	152.624	152.624	XP_011300598.1_CP_Burke-fopius	NA	17959	NW_011887765.1_0:Fopius_arisanus	2	127	96.4	408	15	0	1	408	1	408	4.4e-271	829	408	64838	cellular_organisms	Fopius_arisanus	Fopius	Nudiviridae	Nudiviridae	Eukaryota	Opiinae	Ichneumonoidea	Parasitoida	Apocrita	Hymenoptera	Holometabola	Neoptera	Pterygota	Insecta	Hexapoda	Arthropoda	Metazoa
29	Nudiviridae	Cluster20217	2	NW_011887829.1:48074-49991(+):Fopius_arisanus	Fopius_arisanus	NW_011887829.1_48074-49991_+__Fopius_arisanus	NW_011887829.1:Fopius_arisanus	4	NA	NA	678	386.495	386.495	YP_009553464	NA	18483	NW_011887829.1:Fopius_arisanus	4	47	31.8	678	428	0	3	630	1	678	1.147e-96	335	699	2053981	unclassified_Nudiviridae	Tomelloso_virus	NA	Nudiviridae	Nudiviridae	Viruses	NA	NA	NA	NA	NA	NA	NA	NA	NA	NA	NA	NA
29	Nudiviridae	Cluster21204	2	NW_011887825.1:469594-470107(-):Fopius_arisanus	Fopius_arisanus	NW_011887825.1_469594-470107_-__Fopius_arisanus	NW_011887825.1:Fopius_arisanus	1	NA	NA	431	916.804	916.804	AJZ73137.1_CP_Burke-fopius	NA	18189	NW_011887825.1:Fopius_arisanus	1	28	35.3	153	98	0	20	171	20	172	4.385e-20	91	173	32260	cellular_organisms	Venturia_canescens	Venturia	Nudiviridae	Nudiviridae	Eukaryota	Campopleginae	Ichneumonoidea	Parasitoida	Apocrita	Hymenoptera	Holometabola	Neoptera	Pterygota	Insecta	Hexapoda	Arthropoda	Metazoa
29	Nudiviridae	Cluster21733	1	NW_011887829.1:138909-140064(-):Fopius_arisanus	Fopius_arisanus	NW_011887829.1_138909-140064_-__Fopius_arisanus	NW_011887829.1:Fopius_arisanus	4	NA	NA	289	273.34	273.34	AKH40343.1_CP_Burke-fopius	NA	18512	NW_011887829.1:Fopius_arisanus	4	47	50.1	377	187	0	1	375	65	441	2.498e-106	352	461	1654582	unclassified_Nudiviridae	Kallithea_virus	NA	Nudiviridae	Nudiviridae	Viruses	NA	NA	NA	NA	NA	NA	NA	NA	NA	NA	NA	NA
29	Nudiviridae	Cluster2197	1	NW_011887765.1_0:656133-657693(-):Fopius_arisanus	Fopius_arisanus	NW_011887765.1_0_656133-657693_-__Fopius_arisanus	NW_011887765.1_0:Fopius_arisanus	2	NA	NA	2123	1487	1487	YP_002321431.1_CP_Burke-fopius	NA	17980	NW_011887765.1_0:Fopius_arisanus	2	127	36.8	464	287	0	18	472	160	623	2.37e-81	285	681	92521	NA	Oryctes_rhinoceros_nudivirus	Alphanudivirus	Nudiviridae	Nudiviridae	Viruses	NA	NA	NA	NA	NA	NA	NA	NA	NA	NA	NA	NA
29	Nudiviridae	Cluster23368	1	NW_011887765.1_0:658685-658979(+):Fopius_arisanus	Fopius_arisanus	NW_011887765.1_0_658685-658979_+__Fopius_arisanus	NW_011887765.1_0:Fopius_arisanus	2	NA	NA	63	233.497	233.497	ACH96252	NA	18029	NW_011887765.1_0:Fopius_arisanus	2	127	36.8	98	61	0	1	98	64	160	1.389e-11	63	160	92521	NA	Oryctes_rhinoceros_nudivirus	Alphanudivirus	Nudiviridae	Nudiviridae	Viruses	NA	NA	NA	NA	NA	NA	NA	NA	NA	NA	NA	NA
29	Nudiviridae	Cluster23691	1	NW_011887765.1_0:912106-913015(+):Fopius_arisanus	Fopius_arisanus	NW_011887765.1_0_912106-913015_+__Fopius_arisanus	NW_011887765.1_0:Fopius_arisanus	2	NA	NA	728	874.687	874.687	YP_009551713	NA	18043	NW_011887765.1_0:Fopius_arisanus	2	127	43.9	227	123	0	59	278	145	371	1.889e-48	180	432	2072209	unclassified_Nudiviridae	Esparto_virus	NA	Nudiviridae	Nudiviridae	Viruses	NA	NA	NA	NA	NA	NA	NA	NA	NA	NA	NA	NA
29	Nudiviridae	Cluster23903	1	NW_011887842.1:78097-78724(+):Fopius_arisanus	Fopius_arisanus	NW_011887842.1_78097-78724_+__Fopius_arisanus	NW_011887842.1:Fopius_arisanus	NA	NA	NA	897	1561.69	1561.69	YP_009345998	NA	18700	NW_011887842.1:Fopius_arisanus	NA	34	35.3	129	82	0	83	209	210	338	7.306e-15	78	347	1654582	unclassified_Nudiviridae	Kallithea_virus	NA	Nudiviridae	Nudiviridae	Viruses	NA	NA	NA	NA	NA	NA	NA	NA	NA	NA	NA	NA
29	Nudiviridae	Cluster25942	1	NW_011887765.1_0:916996-917731(+):Fopius_arisanus	Fopius_arisanus	NW_011887765.1_0_916996-917731_+__Fopius_arisanus	NW_011887765.1_0:Fopius_arisanus	2	NA	NA	71	105.473	105.473	YP_009551720	NA	18036	NW_011887765.1_0:Fopius_arisanus	2	127	47.3	250	129	0	1	245	131	380	1.92e-62	218	383	2072209	unclassified_Nudiviridae	Esparto_virus	NA	Nudiviridae	Nudiviridae	Viruses	NA	NA	NA	NA	NA	NA	NA	NA	NA	NA	NA	NA
29	Nudiviridae	Cluster26	1	NW_011887806.1:512466-512946(+):Fopius_arisanus	Fopius_arisanus	NW_011887806.1_512466-512946_+__Fopius_arisanus	NW_011887806.1:Fopius_arisanus	NA	NA	NA	548	1245.66	1245.66	AHW98244.1_CP_Burke-fopius	NA	18105	NW_011887806.1:Fopius_arisanus	NA	37	50.5	153	75	0	8	160	21	172	3.038e-39	146	178	1487700	unclassified_Nudiviridae	Nilaparvata_lugens_endogenous_nudivirus	NA	Nudiviridae	Nudiviridae	Viruses	NA	NA	NA	NA	NA	NA	NA	NA	NA	NA	NA	NA
29	Nudiviridae	Cluster26944	1	NW_011887829.1:144074-144341(-):Fopius_arisanus	Fopius_arisanus	NW_011887829.1_144074-144341_-__Fopius_arisanus	NW_011887829.1:Fopius_arisanus	4	NA	NA	2485	10138	10138	YP_009553398	NA	18682	NW_011887829.1:Fopius_arisanus	4	47	37.2	88	53	0	1	86	5	92	5.86e-10	58	282	2053981	unclassified_Nudiviridae	Tomelloso_virus	NA	Nudiviridae	Nudiviridae	Viruses	NA	NA	NA	NA	NA	NA	NA	NA	NA	NA	NA	NA
29	Nudiviridae	Cluster27187	1	NW_011887765.1_0:910768-911443(-):Fopius_arisanus	Fopius_arisanus	NW_011887765.1_0_910768-911443_-__Fopius_arisanus	NW_011887765.1_0:Fopius_arisanus	2	NA	NA	141	228.053	228.053	YP_009553090	NA	18050	NW_011887765.1_0:Fopius_arisanus	2	127	38.4	215	127	0	9	223	16	222	9.077e-37	142	225	2057187	unclassified_Nudiviridae	Drosophila_innubila_nudivirus	NA	Nudiviridae	Nudiviridae	Viruses	NA	NA	NA	NA	NA	NA	NA	NA	NA	NA	NA	NA
29	Nudiviridae	Cluster3072	1	NW_011887842.1:76167-77145(+):Fopius_arisanus	Fopius_arisanus	NW_011887842.1_76167-77145_+__Fopius_arisanus	NW_011887842.1:Fopius_arisanus	NA	NA	NA	440	491.397	491.397	AJZ73123.1_CP_Burke-fopius	NA	18711	NW_011887842.1:Fopius_arisanus	NA	34	47.6	356	170	0	1	326	2	357	3.409e-93	311	357	32260	cellular_organisms	Venturia_canescens	Venturia	Nudiviridae	Nudiviridae	Eukaryota	Campopleginae	Ichneumonoidea	Parasitoida	Apocrita	Hymenoptera	Holometabola	Neoptera	Pterygota	Insecta	Hexapoda	Arthropoda	Metazoa
29	Nudiviridae	Cluster312	4	NW_011887829.1:44993-47180(+):Fopius_arisanus	Fopius_arisanus	NW_011887829.1_44993-47180_+__Fopius_arisanus	NW_011887829.1:Fopius_arisanus	4	NA	NA	837	418.255	418.255	YP_009551773	NA	18647	NW_011887829.1:Fopius_arisanus	4	47	27.1	713	491	0	4	716	1	674	2.382e-74	271	677	2072209	unclassified_Nudiviridae	Esparto_virus	NA	Nudiviridae	Nudiviridae	Viruses	NA	NA	NA	NA	NA	NA	NA	NA	NA	NA	NA	NA
29	Nudiviridae	Cluster3232	1	NW_011887829.1:142192-142669(+):Fopius_arisanus	Fopius_arisanus	NW_011887829.1_142192-142669_+__Fopius_arisanus	NW_011887829.1:Fopius_arisanus	4	NA	NA	1320	3019.32	3019.32	YP_009345959	NA	18692	NW_011887829.1:Fopius_arisanus	4	47	51.3	134	65	0	1	134	1	134	4.614e-34	131	497	1654582	unclassified_Nudiviridae	Kallithea_virus	NA	Nudiviridae	Nudiviridae	Viruses	NA	NA	NA	NA	NA	NA	NA	NA	NA	NA	NA	NA
29	Nudiviridae	Cluster335	1	NW_011887842.1:77493-77733(-):Fopius_arisanus	Fopius_arisanus	NW_011887842.1_77493-77733_-__Fopius_arisanus	NW_011887842.1:Fopius_arisanus	NA	NA	NA	111	503.58	503.58	AJZ73133.1_CP_Burke-fopius	NA	18705	NW_011887842.1:Fopius_arisanus	NA	34	42.3	78	44	0	1	78	5	82	3.109e-11	61	85	32260	cellular_organisms	Venturia_canescens	Venturia	Nudiviridae	Nudiviridae	Eukaryota	Campopleginae	Ichneumonoidea	Parasitoida	Apocrita	Hymenoptera	Holometabola	Neoptera	Pterygota	Insecta	Hexapoda	Arthropoda	Metazoa
29	Nudiviridae	Cluster3614	19	NW_011887828.1:150055-151519(+):Fopius_arisanus	Fopius_arisanus	NW_011887828.1_150055-151519_+__Fopius_arisanus	NW_011887828.1:Fopius_arisanus	93	NA	NA	322	240.315	240.315	YP_009345996	NA	18216	NW_011887828.1:Fopius_arisanus	93	39	37.4	480	297	0	12	487	21	500	1.371e-87	302	500	1654582	unclassified_Nudiviridae	Kallithea_virus	NA	Nudiviridae	Nudiviridae	Viruses	NA	NA	NA	NA	NA	NA	NA	NA	NA	NA	NA	NA
29	Nudiviridae	Cluster3912	1	NW_011887740.1_0:5194224-5196252(-):Fopius_arisanus	Fopius_arisanus	NW_011887740.1_0_5194224-5196252_-__Fopius_arisanus	NW_011887740.1_0:Fopius_arisanus	9	NA	NA	159	85.6796	85.6796	YP_002321401.1_CP_Pichon-venturia	NA	17905	NW_011887740.1_0:Fopius_arisanus	9	387	19.7	684	520	0	2	649	328	1011	1.19e-32	141	1083	92521	NA	Oryctes_rhinoceros_nudivirus	Alphanudivirus	Nudiviridae	Nudiviridae	Viruses	NA	NA	NA	NA	NA	NA	NA	NA	NA	NA	NA	NA
29	Nudiviridae	Cluster4454	1	NW_011887825.1:468366-469380(-):Fopius_arisanus	Fopius_arisanus	NW_011887825.1_468366-469380_-__Fopius_arisanus	NW_011887825.1:Fopius_arisanus	1	NA	NA	1653	1780.61	1780.61	YP_009553145	NA	18181	NW_011887825.1:Fopius_arisanus	1	28	38.8	341	205	0	3	338	1	341	5.009e-64	227	361	2057187	unclassified_Nudiviridae	Drosophila_innubila_nudivirus	NA	Nudiviridae	Nudiviridae	Viruses	NA	NA	NA	NA	NA	NA	NA	NA	NA	NA	NA	NA
29	Nudiviridae	Cluster469	1	NW_011887765.1_0:913335-913587(+):Fopius_arisanus	Fopius_arisanus	NW_011887765.1_0_913335-913587_+__Fopius_arisanus	NW_011887765.1_0:Fopius_arisanus	2	NA	NA	135	583.413	583.413	ACH96149	NA	18025	NW_011887765.1_0:Fopius_arisanus	2	127	49.3	84	41	0	1	84	17	98	1.689e-17	79	103	92521	NA	Oryctes_rhinoceros_nudivirus	Alphanudivirus	Nudiviridae	Nudiviridae	Viruses	NA	NA	NA	NA	NA	NA	NA	NA	NA	NA	NA	NA
29	Nudiviridae	Cluster5096	4	NW_011887769.1:1059936-1060407(-):Fopius_arisanus	Fopius_arisanus	NW_011887769.1_1059936-1060407_-__Fopius_arisanus	NW_011887769.1:Fopius_arisanus	3	NA	NA	17	39.3794	39.3794	YP_009553401	NA	18058	NW_011887769.1:Fopius_arisanus	3	97	57.2	118	50	0	36	152	18	135	1.65e-34	132	287	2053981	unclassified_Nudiviridae	Tomelloso_virus	NA	Nudiviridae	Nudiviridae	Viruses	NA	NA	NA	NA	NA	NA	NA	NA	NA	NA	NA	NA
29	Nudiviridae	Cluster5096	4	NW_011887769.1:1061515-1061749(-):Fopius_arisanus	Fopius_arisanus	NW_011887769.1_1061515-1061749_-__Fopius_arisanus	NW_011887769.1:Fopius_arisanus	3	NA	NA	23	107.01	107.01	ACH96163	NA	18072	NW_011887769.1:Fopius_arisanus	3	97	44.5	68	37	0	11	78	7	74	6.829e-10	57	255	92521	NA	Oryctes_rhinoceros_nudivirus	Alphanudivirus	Nudiviridae	Nudiviridae	Viruses	NA	NA	NA	NA	NA	NA	NA	NA	NA	NA	NA	NA
29	Nudiviridae	Cluster5096	4	NW_011887829.1:140871-141420(-):Fopius_arisanus	Fopius_arisanus	NW_011887829.1_140871-141420_-__Fopius_arisanus	NW_011887829.1:Fopius_arisanus	4	NA	NA	151	300.177	300.177	YP_009553401	NA	18667	NW_011887829.1:Fopius_arisanus	4	47	52.2	164	77	0	22	183	13	176	1.049e-44	163	287	2053981	unclassified_Nudiviridae	Tomelloso_virus	NA	Nudiviridae	Nudiviridae	Viruses	NA	NA	NA	NA	NA	NA	NA	NA	NA	NA	NA	NA
29	Nudiviridae	Cluster8496	1	NW_011887825.1:470313-471378(+):Fopius_arisanus	Fopius_arisanus	NW_011887825.1_470313-471378_+__Fopius_arisanus	NW_011887825.1:Fopius_arisanus	1	NA	NA	725	743.607	743.607	AKH40321.1_CP_Burke-fopius	NA	18172	NW_011887825.1:Fopius_arisanus	1	28	39	363	213	0	6	355	160	522	1.877e-69	243	523	1654582	unclassified_Nudiviridae	Kallithea_virus	NA	Nudiviridae	Nudiviridae	Viruses	NA	NA	NA	NA	NA	NA	NA	NA	NA	NA	NA	NA
29	Nudiviridae	Cluster8604	1	NW_011887740.1_0:5191350-5191881(+):Fopius_arisanus	Fopius_arisanus	NW_011887740.1_0_5191350-5191881_+__Fopius_arisanus	NW_011887740.1_0:Fopius_arisanus	9	NA	NA	386	793.301	793.301	AKH40381.1_CP_Burke-fopius	NA	17909	NW_011887740.1_0:Fopius_arisanus	9	387	29.1	208	119	0	1	169	1	208	2.887e-20	92	217	1654582	unclassified_Nudiviridae	Kallithea_virus	NA	Nudiviridae	Nudiviridae	Viruses	NA	NA	NA	NA	NA	NA	NA	NA	NA	NA	NA	NA
29	Nudiviridae	Cluster9535	2	NW_011887765.1_0:648914-650126(-):Fopius_arisanus	Fopius_arisanus	NW_011887765.1_0_648914-650126_-__Fopius_arisanus	NW_011887765.1_0:Fopius_arisanus	2	NA	NA	1210	1090.65	1090.65	YP_009345982	NA	17973	NW_011887765.1_0:Fopius_arisanus	2	127	46.9	392	203	0	10	401	90	473	1.461e-100	336	474	1654582	unclassified_Nudiviridae	Kallithea_virus	NA	Nudiviridae	Nudiviridae	Viruses	NA	NA	NA	NA	NA	NA	NA	NA	NA	NA	NA	NA
29	Nudiviridae	Cluster9642	1	NW_011887794.1_0:212317-212893(+):Fopius_arisanus	Fopius_arisanus	NW_011887794.1_0_212317-212893_+__Fopius_arisanus	NW_011887794.1_0:Fopius_arisanus	1	NA	NA	926	1754.68	1754.68	YP_009553067	NA	18103	NW_011887794.1_0:Fopius_arisanus	1	109	43.7	189	106	0	4	192	4	192	9.137e-40	149	192	2057187	unclassified_Nudiviridae	Drosophila_innubila_nudivirus	NA	Nudiviridae	Nudiviridae	Viruses	NA	NA	NA	NA	NA	NA	NA	NA	NA	NA	NA	NA
349	Nudiviridae	Cluster10416	6	JZSA01004415.1:20909-21776(-):Cotesia_vestalis	Cotesia_vestalis	JZSA01004415.1_20909-21776_-__Cotesia_vestalis	JZSA01004415.1:Cotesia_vestalis	1	NA	NA	3587	14277.4	14277.4	NP_690429.1_CP_Bezier-cotesia	NA	7159	JZSA01004415.1:Cotesia_vestalis	1	8	37.8	169	103	0	86	254	60	225	5.178e-25	110	259	NA	NA	NA	NA	Nudiviridae	Nudiviridae	NA	NA	NA	NA	NA	NA	NA	NA	NA	NA	NA	NA	NA
349	Nudiviridae	Cluster10416	6	NW_014463878.1_0:1692636-1693461(-):Microplitis_demolitor	Microplitis_demolitor	NW_014463878.1_0_1692636-1693461_-__Microplitis_demolitor	NW_014463878.1_0:Microplitis_demolitor	55	NA	NA	28044	25614.6	25614.6	NP_690429.1_CP_Bezier-cotesia	NA	20742	NW_014463878.1_0:Microplitis_demolitor	55	100	39.2	169	101	0	81	249	60	226	4.903e-27	116	259	NA	NA	NA	NA	Nudiviridae	Nudiviridae	NA	NA	NA	NA	NA	NA	NA	NA	NA	NA	NA	NA	NA
349	Nudiviridae	Cluster10833	3	JZSA01001239.1:28136-31484(+):Cotesia_vestalis	Cotesia_vestalis	JZSA01001239.1_28136-31484_+__Cotesia_vestalis	JZSA01001239.1:Cotesia_vestalis	20	NA	NA	281	289.886	289.886	YP_009116735	NA	6857	JZSA01001239.1:Cotesia_vestalis	20	9	29.9	1096	697	0	21	1116	7	1001	8.818e-143	488	1001	1546257	unclassified_Nudiviridae	Tipula_oleracea_nudivirus	NA	Nudiviridae	Nudiviridae	Viruses	NA	NA	NA	NA	NA	NA	NA	NA	NA	NA	NA	NA
349	Nudiviridae	Cluster10833	3	NW_014463993.1_0:657015-660393(-):Microplitis_demolitor	Microplitis_demolitor	NW_014463993.1_0_657015-660393_-__Microplitis_demolitor	NW_014463993.1_0:Microplitis_demolitor	153	NA	NA	73729	16461.8	16461.8	YP_009116735	NA	21544	NW_014463993.1_0:Microplitis_demolitor	153	70	29.7	1098	699	0	29	1126	7	1001	5.813e-141	483	1001	1546257	unclassified_Nudiviridae	Tipula_oleracea_nudivirus	NA	Nudiviridae	Nudiviridae	Viruses	NA	NA	NA	NA	NA	NA	NA	NA	NA	NA	NA	NA
349	Nudiviridae	Cluster13904	1	JZSA01004415.1:17583-18195(+):Cotesia_vestalis	Cotesia_vestalis	JZSA01004415.1_17583-18195_+__Cotesia_vestalis	JZSA01004415.1:Cotesia_vestalis	1	NA	NA	1740	9806.75	9806.75	YP_009051945	NA	7307	JZSA01004415.1:Cotesia_vestalis	1	8	23.6	204	154	0	1	204	26	228	2.858e-10	64	235	1529056	unclassified_Nudiviridae	Penaeus_monodon_nudivirus	NA	Nudiviridae	Nudiviridae	Viruses	NA	NA	NA	NA	NA	NA	NA	NA	NA	NA	NA	NA
349	Nudiviridae	Cluster13904	1	NW_014463878.1_0:1688169-1688853(+):Microplitis_demolitor	Microplitis_demolitor	NW_014463878.1_0_1688169-1688853_+__Microplitis_demolitor	NW_014463878.1_0:Microplitis_demolitor	55	NA	NA	50597	55726.6	55726.6	YP_009051945	NA	20905	NW_014463878.1_0:Microplitis_demolitor	55	100	23.1	227	171	0	1	227	5	228	2.301e-11	68	235	1529056	unclassified_Nudiviridae	Penaeus_monodon_nudivirus	NA	Nudiviridae	Nudiviridae	Viruses	NA	NA	NA	NA	NA	NA	NA	NA	NA	NA	NA	NA
349	Nudiviridae	Cluster15164	4	JZSA01003411.1:9846-11424(+):Cotesia_vestalis	Cotesia_vestalis	JZSA01003411.1_9846-11424_+__Cotesia_vestalis	JZSA01003411.1:Cotesia_vestalis	4	NA	NA	469	1026.19	1026.19	YP_009116778	NA	7064	JZSA01003411.1:Cotesia_vestalis	4	1	36.4	516	320	0	1	504	16	531	2.064e-90	312	535	1546257	unclassified_Nudiviridae	Tipula_oleracea_nudivirus	NA	Nudiviridae	Nudiviridae	Viruses	NA	NA	NA	NA	NA	NA	NA	NA	NA	NA	NA	NA
349	Nudiviridae	Cluster15164	4	NW_014463939.1:2233184-2234720(-):Microplitis_demolitor	Microplitis_demolitor	NW_014463939.1_2233184-2234720_-__Microplitis_demolitor	NW_014463939.1:Microplitis_demolitor	6	NA	NA	13462	6607.91	6607.91	YP_009116778	NA	21013	NW_014463939.1:Microplitis_demolitor	6	199	36.6	518	320	0	5	510	16	533	1.086e-91	315	535	1546257	unclassified_Nudiviridae	Tipula_oleracea_nudivirus	NA	Nudiviridae	Nudiviridae	Viruses	NA	NA	NA	NA	NA	NA	NA	NA	NA	NA	NA	NA
349	Nudiviridae	Cluster17433	3	JZSA01001694.1:13174-13846(+):Cotesia_vestalis	Cotesia_vestalis	JZSA01001694.1_13174-13846_+__Cotesia_vestalis	JZSA01001694.1:Cotesia_vestalis	NA	NA	NA	140	718.703	718.703	YP_009116721	NA	6869	JZSA01001694.1:Cotesia_vestalis	NA	4	20.3	217	160	0	1	217	207	408	1.08e-05	50	430	1546257	unclassified_Nudiviridae	Tipula_oleracea_nudivirus	NA	Nudiviridae	Nudiviridae	Viruses	NA	NA	NA	NA	NA	NA	NA	NA	NA	NA	NA	NA
349	Nudiviridae	Cluster17433	3	JZSA01004542.1:9617-10868(+):Cotesia_vestalis	Cotesia_vestalis	JZSA01004542.1_9617-10868_+__Cotesia_vestalis	JZSA01004542.1:Cotesia_vestalis	NA	NA	NA	1371	3783.29	3783.29	YP_009116721	NA	7310	JZSA01004542.1:Cotesia_vestalis	NA	4	19.6	334	265	0	64	397	65	395	3.396e-11	70	430	1546257	unclassified_Nudiviridae	Tipula_oleracea_nudivirus	NA	Nudiviridae	Nudiviridae	Viruses	NA	NA	NA	NA	NA	NA	NA	NA	NA	NA	NA	NA
349	Nudiviridae	Cluster17433	3	NW_014463811.1_1:514802-515969(+):Microplitis_demolitor	Microplitis_demolitor	NW_014463811.1_1_514802-515969_+__Microplitis_demolitor	NW_014463811.1_1:Microplitis_demolitor	5	NA	NA	24202	15632.8	15632.8	YP_009051848	NA	20451	NW_014463811.1_1:Microplitis_demolitor	5	146	22.6	351	259	0	55	389	49	399	3.631e-20	98	449	1529056	unclassified_Nudiviridae	Penaeus_monodon_nudivirus	NA	Nudiviridae	Nudiviridae	Viruses	NA	NA	NA	NA	NA	NA	NA	NA	NA	NA	NA	NA
349	Nudiviridae	Cluster17433	3	NW_014463811.1_1:517988-519128(+):Microplitis_demolitor	Microplitis_demolitor	NW_014463811.1_1_517988-519128_+__Microplitis_demolitor	NW_014463811.1_1:Microplitis_demolitor	5	NA	NA	35237	23299.2	23299.2	YP_009051848	NA	20456	NW_014463811.1_1:Microplitis_demolitor	5	146	21.8	387	296	0	1	380	13	399	5.522e-21	100	449	1529056	unclassified_Nudiviridae	Penaeus_monodon_nudivirus	NA	Nudiviridae	Nudiviridae	Viruses	NA	NA	NA	NA	NA	NA	NA	NA	NA	NA	NA	NA
349	Nudiviridae	Cluster17609	3	JZSA01001903.1:10601-15200(+):Cotesia_vestalis	Cotesia_vestalis	JZSA01001903.1_10601-15200_+__Cotesia_vestalis	JZSA01001903.1:Cotesia_vestalis	3	NA	NA	1216	913.297	913.297	YP_009051932	NA	6878	JZSA01001903.1:Cotesia_vestalis	3	4	17	1421	929	0	12	1432	71	1190	4.376e-48	195	1271	1529056	unclassified_Nudiviridae	Penaeus_monodon_nudivirus	NA	Nudiviridae	Nudiviridae	Viruses	NA	NA	NA	NA	NA	NA	NA	NA	NA	NA	NA	NA
349	Nudiviridae	Cluster17609	3	NW_014463818.1_0:19050-23331(+):Microplitis_demolitor	Microplitis_demolitor	NW_014463818.1_0_19050-23331_+__Microplitis_demolitor	NW_014463818.1_0:Microplitis_demolitor	3	NA	NA	6928	1220.65	1220.65	YP_009051932	NA	20691	NW_014463818.1_0:Microplitis_demolitor	3	251	17.8	1307	871	0	75	1381	97	1157	5.025e-51	204	1271	1529056	unclassified_Nudiviridae	Penaeus_monodon_nudivirus	NA	Nudiviridae	Nudiviridae	Viruses	NA	NA	NA	NA	NA	NA	NA	NA	NA	NA	NA	NA
349	Nudiviridae	Cluster17704	10	JZSA01004415.1:3816-4368(-):Cotesia_vestalis	Cotesia_vestalis	JZSA01004415.1_3816-4368_-__Cotesia_vestalis	JZSA01004415.1:Cotesia_vestalis	1	NA	NA	34	212.417	212.417	YP_004956801	NA	7303	JZSA01004415.1:Cotesia_vestalis	1	8	33.1	159	97	0	24	182	62	207	3.911e-18	86	214	1128424	Helicoverpa_zea_nudivirus_2	Heliothis_zea_nudivirus	Betanudivirus	Nudiviridae	Nudiviridae	Viruses	NA	NA	NA	NA	NA	NA	NA	NA	NA	NA	NA	NA
349	Nudiviridae	Cluster17704	10	JZSA01006625.1_2:1467-2019(-):Cotesia_vestalis	Cotesia_vestalis	JZSA01006625.1_2_1467-2019_-__Cotesia_vestalis	JZSA01006625.1_2:Cotesia_vestalis	1	NA	NA	25	156.189	156.189	YP_004956801	NA	84683	JZSA01006625.1_2:Cotesia_vestalis	1	2	33.1	159	97	0	24	182	62	207	3.911e-18	86	214	1128424	Helicoverpa_zea_nudivirus_2	Heliothis_zea_nudivirus	Betanudivirus	Nudiviridae	Nudiviridae	Viruses	NA	NA	NA	NA	NA	NA	NA	NA	NA	NA	NA	NA
349	Nudiviridae	Cluster17704	10	NW_014463878.1_0:1674578-1675139(-):Microplitis_demolitor	Microplitis_demolitor	NW_014463878.1_0_1674578-1675139_-__Microplitis_demolitor	NW_014463878.1_0:Microplitis_demolitor	55	NA	NA	16885	22666.9	22666.9	NP_690507.1_CP_Bezier-cotesia	NA	20887	NW_014463878.1_0:Microplitis_demolitor	55	100	35.5	157	97	0	31	187	61	212	8.501e-21	94	213	NA	NA	NA	NA	Nudiviridae	Nudiviridae	NA	NA	NA	NA	NA	NA	NA	NA	NA	NA	NA	NA	NA
349	Nudiviridae	Cluster19564	4	JZSA01004415.1:18623-18920(+):Cotesia_vestalis	Cotesia_vestalis	JZSA01004415.1_18623-18920_+__Cotesia_vestalis	JZSA01004415.1:Cotesia_vestalis	1	NA	NA	192	2225.98	2225.98	YP_009116703	NA	7308	JZSA01004415.1:Cotesia_vestalis	1	8	30.6	99	66	0	1	99	30	125	9.359e-07	49	143	1546257	unclassified_Nudiviridae	Tipula_oleracea_nudivirus	NA	Nudiviridae	Nudiviridae	Viruses	NA	NA	NA	NA	NA	NA	NA	NA	NA	NA	NA	NA
349	Nudiviridae	Cluster19564	4	NW_014463878.1_0:1690411-1690738(+):Microplitis_demolitor	Microplitis_demolitor	NW_014463878.1_0_1690411-1690738_+__Microplitis_demolitor	NW_014463878.1_0:Microplitis_demolitor	55	NA	NA	16993	39086.3	39086.3	YP_009116703	NA	20906	NW_014463878.1_0:Microplitis_demolitor	55	100	45	66	34	0	36	101	30	91	4.645e-09	57	143	1546257	unclassified_Nudiviridae	Tipula_oleracea_nudivirus	NA	Nudiviridae	Nudiviridae	Viruses	NA	NA	NA	NA	NA	NA	NA	NA	NA	NA	NA	NA
349	Nudiviridae	Cluster1964	11	JZSA01003787.1:56097-57357(-):Cotesia_vestalis	Cotesia_vestalis	JZSA01003787.1_56097-57357_-__Cotesia_vestalis	JZSA01003787.1:Cotesia_vestalis	NA	NA	NA	273	747.969	747.969	ABF93339.1_CP_Bezier-cotesia	NA	7122	JZSA01003787.1:Cotesia_vestalis	NA	14	17.8	403	306	0	18	420	84	456	5.811e-10	66	593	92521	NA	Oryctes_rhinoceros_nudivirus	Alphanudivirus	Nudiviridae	LbFV_like	Viruses	NA	NA	NA	NA	NA	NA	NA	NA	NA	NA	NA	NA
349	Nudiviridae	Cluster1964	11	JZSA01003787.1:61286-62696(+):Cotesia_vestalis	Cotesia_vestalis	JZSA01003787.1_61286-62696_+__Cotesia_vestalis	JZSA01003787.1:Cotesia_vestalis	NA	NA	NA	101	247.304	247.304	ABF93339.1_CP_Bezier-cotesia	NA	7128	JZSA01003787.1:Cotesia_vestalis	2	14	23	249	184	0	128	376	142	381	4.691e-12	73	593	92521	NA	Oryctes_rhinoceros_nudivirus	Alphanudivirus	Nudiviridae	LbFV_like	Viruses	NA	NA	NA	NA	NA	NA	NA	NA	NA	NA	NA	NA
349	Nudiviridae	Cluster1964	11	NW_014463818.1_0:1127225-1128371(-):Microplitis_demolitor	Microplitis_demolitor	NW_014463818.1_0_1127225-1128371_-__Microplitis_demolitor	NW_014463818.1_0:Microplitis_demolitor	3	NA	NA	5346	3516.36	3516.36	YP_009345710	NA	20513	NW_014463818.1_0:Microplitis_demolitor	3	251	22.9	301	220	0	82	382	127	412	1.168e-16	87	685	552509	unclassified_viruses	Leptopilina_boulardi_filamentous_virus	NA	LbFV_like	LbFV_like	Viruses	NA	NA	NA	NA	NA	NA	NA	NA	NA	NA	NA	NA
349	Nudiviridae	Cluster1964	11	NW_014463818.1_0:1143290-1144232(-):Microplitis_demolitor	Microplitis_demolitor	NW_014463818.1_0_1143290-1144232_-__Microplitis_demolitor	NW_014463818.1_0:Microplitis_demolitor	3	NA	NA	27326	21862.1	21862.1	YP_009345710	NA	20477	NW_014463818.1_0:Microplitis_demolitor	3	251	20.7	298	230	0	2	292	102	399	1.096e-11	70	685	552509	unclassified_viruses	Leptopilina_boulardi_filamentous_virus	NA	LbFV_like	LbFV_like	Viruses	NA	NA	NA	NA	NA	NA	NA	NA	NA	NA	NA	NA
349	Nudiviridae	Cluster1964	11	NW_014463818.1_0:1146060-1147479(-):Microplitis_demolitor	Microplitis_demolitor	NW_014463818.1_0_1146060-1147479_-__Microplitis_demolitor	NW_014463818.1_0:Microplitis_demolitor	3	NA	NA	57818	30718.7	30718.7	YP_009345710	NA	20580	NW_014463818.1_0:Microplitis_demolitor	3	251	17.8	444	363	0	32	473	37	480	6.301e-12	73	685	552509	unclassified_viruses	Leptopilina_boulardi_filamentous_virus	NA	LbFV_like	LbFV_like	Viruses	NA	NA	NA	NA	NA	NA	NA	NA	NA	NA	NA	NA
349	Nudiviridae	Cluster1964	11	NW_014463818.1_0:1148954-1150373(-):Microplitis_demolitor	Microplitis_demolitor	NW_014463818.1_0_1148954-1150373_-__Microplitis_demolitor	NW_014463818.1_0:Microplitis_demolitor	3	NA	NA	61586	32720.7	32720.7	YP_009345710	NA	20500	NW_014463818.1_0:Microplitis_demolitor	3	251	17.9	447	354	0	27	473	49	480	2.712e-12	74	685	552509	unclassified_viruses	Leptopilina_boulardi_filamentous_virus	NA	LbFV_like	LbFV_like	Viruses	NA	NA	NA	NA	NA	NA	NA	NA	NA	NA	NA	NA
349	Nudiviridae	Cluster1964	11	NW_014465001.1:517060-518407(-):Microplitis_demolitor	Microplitis_demolitor	NW_014465001.1_517060-518407_-__Microplitis_demolitor	NW_014465001.1:Microplitis_demolitor	6	NA	NA	87119	48758.6	48758.6	YP_002321323.1_CP_Burke-fopius	NA	22926	NW_014465001.1:Microplitis_demolitor	6	27	19.2	343	260	0	1	343	84	406	1.24e-10	68	593	92521	NA	Oryctes_rhinoceros_nudivirus	Alphanudivirus	Nudiviridae	LbFV_like	Viruses	NA	NA	NA	NA	NA	NA	NA	NA	NA	NA	NA	NA
349	Nudiviridae	Cluster1964	11	NW_014465001.1:521932-523255(+):Microplitis_demolitor	Microplitis_demolitor	NW_014465001.1_521932-523255_+__Microplitis_demolitor	NW_014465001.1:Microplitis_demolitor	NA	NA	NA	44961	25619.8	25619.8	YP_001883375	NA	22916	NW_014465001.1:Microplitis_demolitor	39	27	18.4	380	301	0	25	394	21	400	1.193e-10	68	700	523909	Musca_domestica_salivary_gland_hypertrophy_virus	Musca_hytrovirus	Muscavirus	Hytrosaviridae	LbFV_like	Viruses	NA	NA	NA	NA	NA	NA	NA	NA	NA	NA	NA	NA
349	Nudiviridae	Cluster20217	6	JZSA01005537.1:26150-28088(+):Cotesia_vestalis	Cotesia_vestalis	JZSA01005537.1_26150-28088_+__Cotesia_vestalis	JZSA01005537.1:Cotesia_vestalis	2	NA	NA	162	288.651	288.651	YP_009051910	NA	7644	JZSA01005537.1:Cotesia_vestalis	2	7	26.7	677	466	0	7	643	1	677	1.036e-68	252	684	1529056	unclassified_Nudiviridae	Penaeus_monodon_nudivirus	NA	Nudiviridae	Nudiviridae	Viruses	NA	NA	NA	NA	NA	NA	NA	NA	NA	NA	NA	NA
349	Nudiviridae	Cluster20217	6	NW_014463818.1_0:1792766-1794752(+):Microplitis_demolitor	Microplitis_demolitor	NW_014463818.1_0_1792766-1794752_+__Microplitis_demolitor	NW_014463818.1_0:Microplitis_demolitor	3	NA	NA	59790	22701.7	22701.7	YP_009051910	NA	20590	NW_014463818.1_0:Microplitis_demolitor	3	251	26.9	629	440	0	10	612	1	629	7.508e-64	238	684	1529056	unclassified_Nudiviridae	Penaeus_monodon_nudivirus	NA	Nudiviridae	Nudiviridae	Viruses	NA	NA	NA	NA	NA	NA	NA	NA	NA	NA	NA	NA
349	Nudiviridae	Cluster21733	7	JZSA01000728.1:11438-12605(-):Cotesia_vestalis	Cotesia_vestalis	JZSA01000728.1_11438-12605_-__Cotesia_vestalis	JZSA01000728.1:Cotesia_vestalis	NA	NA	NA	676	1999.59	1999.59	YP_001111333	NA	84645	JZSA01000728.1:Cotesia_vestalis	NA	7	32.3	351	225	0	39	389	43	376	3.751e-47	179	378	432587	NA	Gryllus_bimaculatus_nudivirus	Alphanudivirus	Nudiviridae	Nudiviridae	Viruses	NA	NA	NA	NA	NA	NA	NA	NA	NA	NA	NA	NA
349	Nudiviridae	Cluster21733	7	NW_014463943.1:629502-630657(+):Microplitis_demolitor	Microplitis_demolitor	NW_014463943.1_629502-630657_+__Microplitis_demolitor	NW_014463943.1:Microplitis_demolitor	NA	NA	NA	37053	24182.1	24182.1	YP_001111333	NA	21528	NW_014463943.1:Microplitis_demolitor	126	109	33.1	324	202	0	15	338	27	329	8.463e-45	172	378	432587	NA	Gryllus_bimaculatus_nudivirus	Alphanudivirus	Nudiviridae	Nudiviridae	Viruses	NA	NA	NA	NA	NA	NA	NA	NA	NA	NA	NA	NA
349	Nudiviridae	Cluster22358	7	JZSA01000646.1:6300-7137(+):Cotesia_vestalis	Cotesia_vestalis	JZSA01000646.1_6300-7137_+__Cotesia_vestalis	JZSA01000646.1:Cotesia_vestalis	NA	NA	NA	692	2852.98	2852.98	YP_009116690	NA	6605	JZSA01000646.1:Cotesia_vestalis	NA	4	34.8	279	170	0	19	279	51	329	6.559e-42	160	331	1546257	unclassified_Nudiviridae	Tipula_oleracea_nudivirus	NA	Nudiviridae	Nudiviridae	Viruses	NA	NA	NA	NA	NA	NA	NA	NA	NA	NA	NA	NA
349	Nudiviridae	Cluster22358	7	JZSA01003236.1:1714-2650(+):Cotesia_vestalis	Cotesia_vestalis	JZSA01003236.1_1714-2650_+__Cotesia_vestalis	JZSA01003236.1:Cotesia_vestalis	NA	NA	NA	430	1585.5	1585.5	YP_009116690	NA	7047	JZSA01003236.1:Cotesia_vestalis	NA	6	24	281	203	0	1	268	6	286	1.024e-17	89	331	1546257	unclassified_Nudiviridae	Tipula_oleracea_nudivirus	NA	Nudiviridae	Nudiviridae	Viruses	NA	NA	NA	NA	NA	NA	NA	NA	NA	NA	NA	NA
349	Nudiviridae	Cluster22358	7	NW_014463810.1_0:87458-88379(+):Microplitis_demolitor	Microplitis_demolitor	NW_014463810.1_0_87458-88379_+__Microplitis_demolitor	NW_014463810.1_0:Microplitis_demolitor	40	NA	NA	3205	2622.56	2622.56	YP_009116690	NA	20414	NW_014463810.1_0:Microplitis_demolitor	40	17	24.7	258	179	0	17	255	15	272	7.569e-17	86	331	1546257	unclassified_Nudiviridae	Tipula_oleracea_nudivirus	NA	Nudiviridae	Nudiviridae	Viruses	NA	NA	NA	NA	NA	NA	NA	NA	NA	NA	NA	NA
349	Nudiviridae	Cluster22358	7	NW_014463878.1_0:1737989-1738817(+):Microplitis_demolitor	Microplitis_demolitor	NW_014463878.1_0_1737989-1738817_+__Microplitis_demolitor	NW_014463878.1_0:Microplitis_demolitor	55	NA	NA	6483	5899.97	5899.97	YP_009116690	NA	20899	NW_014463878.1_0:Microplitis_demolitor	55	100	36.7	276	163	0	19	276	51	326	1.313e-45	170	331	1546257	unclassified_Nudiviridae	Tipula_oleracea_nudivirus	NA	Nudiviridae	Nudiviridae	Viruses	NA	NA	NA	NA	NA	NA	NA	NA	NA	NA	NA	NA
349	Nudiviridae	Cluster24469	1	JZSA01004929.1_1:3863-4793(-):Cotesia_vestalis	Cotesia_vestalis	JZSA01004929.1_1_3863-4793_-__Cotesia_vestalis	JZSA01004929.1_1:Cotesia_vestalis	1	NA	NA	548	2033.61	2033.61	YP_009116712	NA	7324	JZSA01004929.1_1:Cotesia_vestalis	1	1	29.2	300	210	0	1	300	66	362	5.876e-32	132	385	1546257	unclassified_Nudiviridae	Tipula_oleracea_nudivirus	NA	Nudiviridae	Nudiviridae	Viruses	NA	NA	NA	NA	NA	NA	NA	NA	NA	NA	NA	NA
349	Nudiviridae	Cluster24469	1	NW_014463939.1:1880846-1881779(+):Microplitis_demolitor	Microplitis_demolitor	NW_014463939.1_1880846-1881779_+__Microplitis_demolitor	NW_014463939.1:Microplitis_demolitor	6	NA	NA	13243	10697.1	10697.1	YP_009116712	NA	20995	NW_014463939.1:Microplitis_demolitor	6	199	27.5	311	223	0	1	311	67	374	2.771e-29	124	385	1546257	unclassified_Nudiviridae	Tipula_oleracea_nudivirus	NA	Nudiviridae	Nudiviridae	Viruses	NA	NA	NA	NA	NA	NA	NA	NA	NA	NA	NA	NA
349	Nudiviridae	Cluster27041	1	JZSA01004415.1:6868-7723(+):Cotesia_vestalis	Cotesia_vestalis	JZSA01004415.1_6868-7723_+__Cotesia_vestalis	JZSA01004415.1:Cotesia_vestalis	1	NA	NA	15785	63709.9	63709.9	YP_009116734	NA	7305	JZSA01004415.1:Cotesia_vestalis	1	8	21.3	272	206	0	1	263	26	297	2.452e-11	69	324	1546257	unclassified_Nudiviridae	Tipula_oleracea_nudivirus	NA	Nudiviridae	Nudiviridae	Viruses	NA	NA	NA	NA	NA	NA	NA	NA	NA	NA	NA	NA
349	Nudiviridae	Cluster27041	1	JZSA01006625.1_2:4519-5374(+):Cotesia_vestalis	Cotesia_vestalis	JZSA01006625.1_2_4519-5374_+__Cotesia_vestalis	JZSA01006625.1_2:Cotesia_vestalis	1	NA	NA	9538	38496.4	38496.4	YP_009116734	NA	84685	JZSA01006625.1_2:Cotesia_vestalis	1	2	21.2	272	206	0	1	263	26	297	4.415e-11	68	324	1546257	unclassified_Nudiviridae	Tipula_oleracea_nudivirus	NA	Nudiviridae	Nudiviridae	Viruses	NA	NA	NA	NA	NA	NA	NA	NA	NA	NA	NA	NA
349	Nudiviridae	Cluster27041	1	NW_014463878.1_0:1675610-1676423(+):Microplitis_demolitor	Microplitis_demolitor	NW_014463878.1_0_1675610-1676423_+__Microplitis_demolitor	NW_014463878.1_0:Microplitis_demolitor	55	NA	NA	232017	215042	215042	YP_009116734	NA	20903	NW_014463878.1_0:Microplitis_demolitor	55	100	21.4	284	212	0	1	271	26	309	1.386e-12	72	324	1546257	unclassified_Nudiviridae	Tipula_oleracea_nudivirus	NA	Nudiviridae	Nudiviridae	Viruses	NA	NA	NA	NA	NA	NA	NA	NA	NA	NA	NA	NA
349	Nudiviridae	Cluster3072	4	JZSA01004897.1:7705-8662(+):Cotesia_vestalis	Cotesia_vestalis	JZSA01004897.1_7705-8662_+__Cotesia_vestalis	JZSA01004897.1:Cotesia_vestalis	1	NA	NA	1333	4807.3	4807.3	YP_009116762	NA	7322	JZSA01004897.1:Cotesia_vestalis	1	6	30.1	318	212	0	1	318	26	329	8.625e-37	146	333	1546257	unclassified_Nudiviridae	Tipula_oleracea_nudivirus	NA	Nudiviridae	Nudiviridae	Viruses	NA	NA	NA	NA	NA	NA	NA	NA	NA	NA	NA	NA
349	Nudiviridae	Cluster3072	4	NW_014463939.1:1121724-1122696(+):Microplitis_demolitor	Microplitis_demolitor	NW_014463939.1_1121724-1122696_+__Microplitis_demolitor	NW_014463939.1:Microplitis_demolitor	6	NA	NA	28844	22365.1	22365.1	YP_009116762	NA	21089	NW_014463939.1:Microplitis_demolitor	6	199	30.3	323	217	0	1	323	17	329	6.223e-38	150	333	1546257	unclassified_Nudiviridae	Tipula_oleracea_nudivirus	NA	Nudiviridae	Nudiviridae	Viruses	NA	NA	NA	NA	NA	NA	NA	NA	NA	NA	NA	NA
349	Nudiviridae	Cluster312	6	JZSA01003056.1:333693-334902(+):Cotesia_vestalis	Cotesia_vestalis	JZSA01003056.1_333693-334902_+__Cotesia_vestalis	JZSA01003056.1:Cotesia_vestalis	NA	NA	NA	104	296.951	296.951	YP_009116663	NA	7011	JZSA01003056.1:Cotesia_vestalis	NA	51	25.4	247	176	0	81	327	81	317	1.442e-16	87	742	1546257	unclassified_Nudiviridae	Tipula_oleracea_nudivirus	NA	Nudiviridae	Nudiviridae	Viruses	NA	NA	NA	NA	NA	NA	NA	NA	NA	NA	NA	NA
349	Nudiviridae	Cluster312	6	NW_014463781.1:3058689-3059700(-):Microplitis_demolitor	Microplitis_demolitor	NW_014463781.1_3058689-3059700_-__Microplitis_demolitor	NW_014463781.1:Microplitis_demolitor	5	NA	NA	19143	14271.1	14271.1	YP_009116663	NA	20204	NW_014463781.1:Microplitis_demolitor	5	261	27.4	242	171	0	96	337	81	317	5.471e-20	96	742	1546257	unclassified_Nudiviridae	Tipula_oleracea_nudivirus	NA	Nudiviridae	Nudiviridae	Viruses	NA	NA	NA	NA	NA	NA	NA	NA	NA	NA	NA	NA
349	Nudiviridae	Cluster3614	32	JZSA01000728.1:9553-11089(+):Cotesia_vestalis	Cotesia_vestalis	JZSA01000728.1_9553-11089_+__Cotesia_vestalis	JZSA01000728.1:Cotesia_vestalis	NA	NA	NA	274	615.904	615.904	YP_009116716	NA	84602	JZSA01000728.1:Cotesia_vestalis	NA	7	26.6	430	293	0	83	512	74	473	9.418e-40	161	527	1546257	unclassified_Nudiviridae	Tipula_oleracea_nudivirus	NA	Nudiviridae	Nudiviridae	Viruses	NA	NA	NA	NA	NA	NA	NA	NA	NA	NA	NA	NA
349	Nudiviridae	Cluster3614	32	NW_014463943.1:623064-624579(-):Microplitis_demolitor	Microplitis_demolitor	NW_014463943.1_623064-624579_-__Microplitis_demolitor	NW_014463943.1:Microplitis_demolitor	19	NA	NA	32426	16137	16137	YP_009116716	NA	21479	NW_014463943.1:Microplitis_demolitor	19	109	26.3	478	330	0	28	505	31	479	2.356e-44	175	527	1546257	unclassified_Nudiviridae	Tipula_oleracea_nudivirus	NA	Nudiviridae	Nudiviridae	Viruses	NA	NA	NA	NA	NA	NA	NA	NA	NA	NA	NA	NA
315	LbFV_like	Cluster10416	7	JZSA01007324.1_2:5279-5795(-):Cotesia_vestalis	Cotesia_vestalis	JZSA01007324.1_2_5279-5795_-__Cotesia_vestalis	JZSA01007324.1_2:Cotesia_vestalis	1	NA	NA	7	46.7782	46.7782	YP_009345623	NA	84912	JZSA01007324.1_2:Cotesia_vestalis	1	1	32.2	172	109	0	1	172	51	212	2.167e-19	89	226	552509	unclassified_viruses	Leptopilina_boulardi_filamentous_virus	NA	LbFV_like	Nudiviridae	Viruses	NA	NA	NA	NA	NA	NA	NA	NA	NA	NA	NA	NA
315	LbFV_like	Cluster1043	2	JZSA01000885.1_0:34348-37408(-):Cotesia_vestalis	Cotesia_vestalis	JZSA01000885.1_0_34348-37408_-__Cotesia_vestalis	JZSA01000885.1_0:Cotesia_vestalis	2	NA	NA	88	99.3243	99.3243	YP_009345700.1_CP_Varaldi-leptopilina	NA	6827	JZSA01000885.1_0:Cotesia_vestalis	2	2	26.1	1011	743	0	1	1011	39	1044	3.836e-101	360	1048	552509	unclassified_viruses	Leptopilina_boulardi_filamentous_virus	NA	LbFV_like	LbFV_like	Viruses	NA	NA	NA	NA	NA	NA	NA	NA	NA	NA	NA	NA
315	LbFV_like	Cluster12537	4	JZSA01007324.1_2:40472-41264(-):Cotesia_vestalis	Cotesia_vestalis	JZSA01007324.1_2_40472-41264_-__Cotesia_vestalis	JZSA01007324.1_2:Cotesia_vestalis	1	NA	NA	7	30.4973	30.4973	QKN22505.1	NA	85000	JZSA01007324.1_2:Cotesia_vestalis	1	1	26	266	195	0	1	264	30	295	9e-21	97	302	NA	NA	Drosophila-associated filamentous virus	NA	LbFV_like	LbFV_like	NA	NA	NA	NA	NA	NA	NA	NA	NA	NA	NA	NA	NA
315	LbFV_like	Cluster1964	12	JZSA01007324.1_2:38158-40393(-):Cotesia_vestalis	Cotesia_vestalis	JZSA01007324.1_2_38158-40393_-__Cotesia_vestalis	JZSA01007324.1_2:Cotesia_vestalis	1	NA	NA	22	33.9928	33.9928	YP_009345710	NA	84748	JZSA01007324.1_2:Cotesia_vestalis	1	1	30.9	546	363	0	1	546	1	526	8.756e-70	258	685	552509	unclassified_viruses	Leptopilina_boulardi_filamentous_virus	NA	LbFV_like	LbFV_like	Viruses	NA	NA	NA	NA	NA	NA	NA	NA	NA	NA	NA	NA
315	LbFV_like	Cluster20069	1	JZSA01000885.1_0:29040-31062(-):Cotesia_vestalis	Cotesia_vestalis	JZSA01000885.1_0_29040-31062_-__Cotesia_vestalis	JZSA01000885.1_0:Cotesia_vestalis	2	NA	NA	127	216.892	216.892	AQQ79998	NA	6610	JZSA01000885.1_0:Cotesia_vestalis	2	2	30.8	661	418	0	1	661	50	654	7.742e-88	310	676	552509	unclassified_viruses	Leptopilina_boulardi_filamentous_virus	NA	LbFV_like	LbFV_like	Viruses	NA	NA	NA	NA	NA	NA	NA	NA	NA	NA	NA	NA
315	LbFV_like	Cluster20217	9	JZSA01007324.1_2:58204-60172(-):Cotesia_vestalis	Cotesia_vestalis	JZSA01007324.1_2_58204-60172_-__Cotesia_vestalis	JZSA01007324.1_2:Cotesia_vestalis	1	NA	NA	16	28.0744	28.0744	YP_009345667	NA	84891	JZSA01007324.1_2:Cotesia_vestalis	1	1	23.1	654	478	0	3	656	3	625	2.945e-47	187	729	552509	unclassified_viruses	Leptopilina_boulardi_filamentous_virus	NA	LbFV_like	Nudiviridae	Viruses	NA	NA	NA	NA	NA	NA	NA	NA	NA	NA	NA	NA
315	LbFV_like	Cluster21657	1	JZSA01007324.1_2:18395-19460(+):Cotesia_vestalis	Cotesia_vestalis	JZSA01007324.1_2_18395-19460_+__Cotesia_vestalis	JZSA01007324.1_2:Cotesia_vestalis	1	NA	NA	7	22.687	22.687	AQQ79980	NA	84996	JZSA01007324.1_2:Cotesia_vestalis	1	1	25.2	349	257	0	12	355	5	353	2.175e-27	119	362	552509	unclassified_viruses	Leptopilina_boulardi_filamentous_virus	NA	LbFV_like	LbFV_like	Viruses	NA	NA	NA	NA	NA	NA	NA	NA	NA	NA	NA	NA
315	LbFV_like	Cluster21733	26	JZSA01007324.1_2:17142-17889(-):Cotesia_vestalis	Cotesia_vestalis	JZSA01007324.1_2_17142-17889_-__Cotesia_vestalis	JZSA01007324.1_2:Cotesia_vestalis	1	NA	NA	2	9.23772	9.23772	YP_009345656	NA	84914	JZSA01007324.1_2:Cotesia_vestalis	1	1	29.3	249	159	0	1	249	140	365	1.287e-25	111	373	552509	unclassified_viruses	Leptopilina_boulardi_filamentous_virus	NA	LbFV_like	Nudiviridae	Viruses	NA	NA	NA	NA	NA	NA	NA	NA	NA	NA	NA	NA
315	LbFV_like	Cluster22219	2	JZSA01002659.1:43997-45989(+):Cotesia_vestalis	Cotesia_vestalis	JZSA01002659.1_43997-45989_+__Cotesia_vestalis	JZSA01002659.1:Cotesia_vestalis	1	NA	NA	1490	2582.95	2582.95	YP_009345672.1_CP_Varaldi-leptopilina	NA	7008	JZSA01002659.1:Cotesia_vestalis	1	2	20.5	664	462	0	1	664	63	644	4.932e-35	149	645	552509	unclassified_viruses	Leptopilina_boulardi_filamentous_virus	NA	LbFV_like	LbFV_like	Viruses	NA	NA	NA	NA	NA	NA	NA	NA	NA	NA	NA	NA
315	LbFV_like	Cluster26024	3	JZSA01007324.1_2:48826-52720(-):Cotesia_vestalis	Cotesia_vestalis	JZSA01007324.1_2_48826-52720_-__Cotesia_vestalis	JZSA01007324.1_2:Cotesia_vestalis	1	NA	NA	322	285.617	285.617	AQQ80012	NA	84901	JZSA01007324.1_2:Cotesia_vestalis	1	1	16.5	1289	903	0	9	1297	470	1552	2.102e-38	162	1593	552509	unclassified_viruses	Leptopilina_boulardi_filamentous_virus	NA	LbFV_like	LbFV_like	Viruses	NA	NA	NA	NA	NA	NA	NA	NA	NA	NA	NA	NA
315	LbFV_like	Cluster26675	1	JZSA01007324.1_2:35986-36715(+):Cotesia_vestalis	Cotesia_vestalis	JZSA01007324.1_2_35986-36715_+__Cotesia_vestalis	JZSA01007324.1_2:Cotesia_vestalis	1	NA	NA	0	0	0	QKN22513.1	NA	84983	JZSA01007324.1_2:Cotesia_vestalis	1	1	28	239	165	0	1	239	3	232	1.127e-21	99	233	NA	NA	Drosophila-associated filamentous virus	NA	LbFV_like	LbFV_like	NA	NA	NA	NA	NA	NA	NA	NA	NA	NA	NA	NA	NA
315	LbFV_like	Cluster27203	6	JZSA01000885.1_0:12137-15233(+):Cotesia_vestalis	Cotesia_vestalis	JZSA01000885.1_0_12137-15233_+__Cotesia_vestalis	JZSA01000885.1_0:Cotesia_vestalis	2	NA	NA	200	223.113	223.113	YP_009345662.1_CP_Varaldi-leptopilina	NA	6808	JZSA01000885.1_0:Cotesia_vestalis	2	2	25.2	1032	761	0	1	1032	245	1262	1.261e-95	344	1308	552509	unclassified_viruses	Leptopilina_boulardi_filamentous_virus	NA	LbFV_like	LbFV_like	Viruses	NA	NA	NA	NA	NA	NA	NA	NA	NA	NA	NA	NA
315	LbFV_like	Cluster27203	6	JZSA01004450.1_1:2267-4037(+):Cotesia_vestalis	Cotesia_vestalis	JZSA01004450.1_1_2267-4037_+__Cotesia_vestalis	JZSA01004450.1_1:Cotesia_vestalis	NA	NA	NA	47	91.6886	91.6886	AQQ79978	NA	165719	JZSA01004450.1_1:Cotesia_vestalis	NA	0	26	590	413	0	1	590	20	578	2.368e-55	210	1308	552509	unclassified_viruses	Leptopilina_boulardi_filamentous_virus	NA	LbFV_like	LbFV_like	Viruses	NA	NA	NA	NA	NA	NA	NA	NA	NA	NA	NA	NA
315	LbFV_like	Cluster5563	1	JZSA01000885.1_0:45546-45858(+):Cotesia_vestalis	Cotesia_vestalis	JZSA01000885.1_0_45546-45858_+__Cotesia_vestalis	JZSA01000885.1_0:Cotesia_vestalis	2	NA	NA	0	0	0	QKN22511.1	NA	6825	JZSA01000885.1_0:Cotesia_vestalis	2	2	40.3	84	48	0	1	84	145	226	6.294e-11	62	294	NA	NA	Drosophila-associated filamentous virus	NA	LbFV_like	LbFV_like	NA	NA	NA	NA	NA	NA	NA	NA	NA	NA	NA	NA	NA
315	LbFV_like	Cluster8973	1	JZSA01000885.1_0:24563-25919(+):Cotesia_vestalis	Cotesia_vestalis	JZSA01000885.1_0_24563-25919_+__Cotesia_vestalis	JZSA01000885.1_0:Cotesia_vestalis	2	NA	NA	99	252.053	252.053	AQQ80027	NA	6835	JZSA01000885.1_0:Cotesia_vestalis	2	2	19.3	471	358	0	9	452	152	622	2.968e-18	93	625	552509	unclassified_viruses	Leptopilina_boulardi_filamentous_virus	NA	LbFV_like	LbFV_like	Viruses	NA	NA	NA	NA	NA	NA	NA	NA	NA	NA	NA	NA
358	LbFV_like	Cluster1043	4	IDBA_scaffold_1712:13778-16805(-):Leptopilina_heterotoma	Leptopilina_heterotoma	IDBA_scaffold_1712_13778-16805_-__Leptopilina_heterotoma	IDBA_scaffold_1712:Leptopilina_heterotoma	NA	NA	NA	22	3.88648	3.88648	AQQ80016	NA	63077	IDBA_scaffold_1712:Leptopilina_heterotoma	NA	3	41.6	994	578	0	11	1000	48	1041	1.274e-222	720	1048	552509	unclassified_viruses	Leptopilina_boulardi_filamentous_virus	NA	LbFV_like	LbFV_like	Viruses	NA	NA	NA	NA	NA	NA	NA	NA	NA	NA	NA	NA
358	LbFV_like	Cluster1043	4	IDBA_scaffold_2184:3542-6539(+):Leptopilina_boulardi	Leptopilina_boulardi	IDBA_scaffold_2184_3542-6539_+__Leptopilina_boulardi	IDBA_scaffold_2184:Leptopilina_boulardi	NA	NA	NA	446	69.6294	69.6294	YP_009345700.1_CP_Varaldi-leptopilina	NA	65159	IDBA_scaffold_2184:Leptopilina_boulardi	NA	2	43.3	994	548	0	23	990	48	1041	4.147e-237	762	1048	552509	unclassified_viruses	Leptopilina_boulardi_filamentous_virus	NA	LbFV_like	LbFV_like	Viruses	NA	NA	NA	NA	NA	NA	NA	NA	NA	NA	NA	NA
358	LbFV_like	Cluster1043	4	scf7180005173345_2:951-3954(-):Leptopilina_clavipes	Leptopilina_clavipes	scf7180005173345_2_951-3954_-__Leptopilina_clavipes	scf7180005173345_2:Leptopilina_clavipes	NA	NA	NA	0	0	0	AQQ80016	NA	64668	scf7180005173345_2:Leptopilina_clavipes	NA	4	41.9	994	570	0	11	992	48	1041	1.396e-225	728	1048	552509	unclassified_viruses	Leptopilina_boulardi_filamentous_virus	NA	LbFV_like	LbFV_like	Viruses	NA	NA	NA	NA	NA	NA	NA	NA	NA	NA	NA	NA
358	LbFV_like	Cluster12272	1	IDBA_scaffold_9791:7005-8277(+):Leptopilina_heterotoma	Leptopilina_heterotoma	IDBA_scaffold_9791_7005-8277_+__Leptopilina_heterotoma	IDBA_scaffold_9791:Leptopilina_heterotoma	NA	NA	NA	231	97.0674	97.0674	AQQ80003	NA	146219	IDBA_scaffold_9791:Leptopilina_heterotoma	NA	0	23	420	303	0	5	424	14	407	2.299e-27	121	433	552509	unclassified_viruses	Leptopilina_boulardi_filamentous_virus	NA	LbFV_like	LbFV_like	Viruses	NA	NA	NA	NA	NA	NA	NA	NA	NA	NA	NA	NA
358	LbFV_like	Cluster12272	1	scaffold_2315:843-2139(+):Leptopilina_boulardi	Leptopilina_boulardi	scaffold_2315_843-2139_+__Leptopilina_boulardi	scaffold_2315:Leptopilina_boulardi	NA	NA	NA	248	89.4955	89.4955	AQQ80003	NA	65927	scaffold_2315:Leptopilina_boulardi	NA	2	22.2	432	313	0	1	432	5	407	8.908e-26	116	433	552509	unclassified_viruses	Leptopilina_boulardi_filamentous_virus	NA	LbFV_like	LbFV_like	Viruses	NA	NA	NA	NA	NA	NA	NA	NA	NA	NA	NA	NA
358	LbFV_like	Cluster12272	1	scf7180005174071_1:569-1841(+):Leptopilina_clavipes	Leptopilina_clavipes	scf7180005174071_1_569-1841_+__Leptopilina_clavipes	scf7180005174071_1:Leptopilina_clavipes	NA	NA	NA	0	0	0	YP_009345687.1_CP_Varaldi-leptopilina	NA	64674	scf7180005174071_1:Leptopilina_clavipes	NA	1	23.3	424	303	0	1	424	9	404	1.598e-28	124	433	552509	unclassified_viruses	Leptopilina_boulardi_filamentous_virus	NA	LbFV_like	LbFV_like	Viruses	NA	NA	NA	NA	NA	NA	NA	NA	NA	NA	NA	NA
358	LbFV_like	Cluster20069	4	IDBA_scaffold_13958:2267-4223(+):Leptopilina_boulardi	Leptopilina_boulardi	IDBA_scaffold_13958_2267-4223_+__Leptopilina_boulardi	IDBA_scaffold_13958:Leptopilina_boulardi	NA	NA	NA	421	100.689	100.689	AQQ79998	NA	146222	IDBA_scaffold_13958:Leptopilina_boulardi	NA	0	39.8	651	380	0	1	651	43	675	3.721e-134	445	676	552509	unclassified_viruses	Leptopilina_boulardi_filamentous_virus	NA	LbFV_like	LbFV_like	Viruses	NA	NA	NA	NA	NA	NA	NA	NA	NA	NA	NA	NA
358	LbFV_like	Cluster20069	4	IDBA_scaffold_9791:2015-4001(-):Leptopilina_heterotoma	Leptopilina_heterotoma	IDBA_scaffold_9791_2015-4001_-__Leptopilina_heterotoma	IDBA_scaffold_9791:Leptopilina_heterotoma	NA	NA	NA	21	5.65342	5.65342	AQQ79998	NA	146216	IDBA_scaffold_9791:Leptopilina_heterotoma	NA	0	40.3	662	377	0	1	662	43	675	2.075e-139	461	676	552509	unclassified_viruses	Leptopilina_boulardi_filamentous_virus	NA	LbFV_like	LbFV_like	Viruses	NA	NA	NA	NA	NA	NA	NA	NA	NA	NA	NA	NA
358	LbFV_like	Cluster20069	4	scf7180005177077_2:5853-7848(+):Leptopilina_clavipes	Leptopilina_clavipes	scf7180005177077_2_5853-7848_+__Leptopilina_clavipes	scf7180005177077_2:Leptopilina_clavipes	NA	NA	NA	0	0	0	AQQ79998	NA	64708	scf7180005177077_2:Leptopilina_clavipes	NA	1	39.5	664	381	0	1	664	40	669	3.557e-135	449	676	552509	unclassified_viruses	Leptopilina_boulardi_filamentous_virus	NA	LbFV_like	LbFV_like	Viruses	NA	NA	NA	NA	NA	NA	NA	NA	NA	NA	NA	NA
358	LbFV_like	Cluster21657	4	scaffold_1324_0:3064-4192(-):Leptopilina_heterotoma	Leptopilina_heterotoma	scaffold_1324_0_3064-4192_-__Leptopilina_heterotoma	scaffold_1324_0:Leptopilina_heterotoma	NA	NA	NA	741	351.086	351.086	QKN22504.1	NA	63566	scaffold_1324_0:Leptopilina_heterotoma	NA	1	38.3	374	228	0	3	373	33	406	2.123e-69	244	412	NA	NA	Drosophila-associated filamentous virus	NA	LbFV_like	LbFV_like	NA	NA	NA	NA	NA	NA	NA	NA	NA	NA	NA	NA	NA
358	LbFV_like	Cluster21657	4	scaffold_159:186374-187475(-):Leptopilina_boulardi	Leptopilina_boulardi	scaffold_159_186374-187475_-__Leptopilina_boulardi	scaffold_159:Leptopilina_boulardi	7	NA	NA	624	265.029	265.029	QKN22504.1	NA	44410	scaffold_159:Leptopilina_boulardi	7	60	36.3	382	231	0	1	364	25	406	4.513e-65	231	412	NA	NA	Drosophila-associated filamentous virus	NA	LbFV_like	LbFV_like	NA	NA	NA	NA	NA	NA	NA	NA	NA	NA	NA	NA	NA
358	LbFV_like	Cluster21657	4	scf7180005174113_1:943-2098(+):Leptopilina_clavipes	Leptopilina_clavipes	scf7180005174113_1_943-2098_+__Leptopilina_clavipes	scf7180005174113_1:Leptopilina_clavipes	NA	NA	NA	0	0	0	QKN22504.1	NA	170029	scf7180005174113_1:Leptopilina_clavipes	NA	0	38.3	382	235	0	1	382	25	406	6.924e-71	249	412	NA	NA	Drosophila-associated filamentous virus	NA	LbFV_like	LbFV_like	NA	NA	NA	NA	NA	NA	NA	NA	NA	NA	NA	NA	NA
358	LbFV_like	Cluster22219	4	IDBA_scaffold_6001:5554-7513(-):Leptopilina_heterotoma	Leptopilina_heterotoma	IDBA_scaffold_6001_5554-7513_-__Leptopilina_heterotoma	IDBA_scaffold_6001:Leptopilina_heterotoma	5	NA	NA	238	64.9547	64.9547	YP_009345672.1_CP_Varaldi-leptopilina	NA	113076	IDBA_scaffold_6001:Leptopilina_heterotoma	5	0	35.1	651	409	0	1	651	12	642	4.413e-109	372	645	552509	unclassified_viruses	Leptopilina_boulardi_filamentous_virus	NA	LbFV_like	LbFV_like	Viruses	NA	NA	NA	NA	NA	NA	NA	NA	NA	NA	NA	NA
358	LbFV_like	Cluster22219	4	scaffold_159:150948-152847(+):Leptopilina_boulardi	Leptopilina_boulardi	scaffold_159_150948-152847_+__Leptopilina_boulardi	scaffold_159:Leptopilina_boulardi	7	NA	NA	569	140.168	140.168	YP_009345672.1_CP_Varaldi-leptopilina	NA	44387	scaffold_159:Leptopilina_boulardi	7	60	35.6	633	402	0	1	633	18	642	8.06e-109	370	645	552509	unclassified_viruses	Leptopilina_boulardi_filamentous_virus	NA	LbFV_like	LbFV_like	Viruses	NA	NA	NA	NA	NA	NA	NA	NA	NA	NA	NA	NA
358	LbFV_like	Cluster22219	4	scf7180005174277:5075-7034(+):Leptopilina_clavipes	Leptopilina_clavipes	scf7180005174277_5075-7034_+__Leptopilina_clavipes	scf7180005174277:Leptopilina_clavipes	NA	NA	NA	0	0	0	YP_009345672.1_CP_Varaldi-leptopilina	NA	113068	scf7180005174277:Leptopilina_clavipes	NA	0	36.4	653	399	0	1	653	16	644	2.431e-116	393	645	552509	unclassified_viruses	Leptopilina_boulardi_filamentous_virus	NA	LbFV_like	LbFV_like	Viruses	NA	NA	NA	NA	NA	NA	NA	NA	NA	NA	NA	NA
358	LbFV_like	Cluster22585	2	IDBA_scaffold_8257:5441-7661(+):Leptopilina_heterotoma	Leptopilina_heterotoma	IDBA_scaffold_8257_5441-7661_+__Leptopilina_heterotoma	IDBA_scaffold_8257:Leptopilina_heterotoma	4	NA	NA	352	84.7781	84.7781	QKN22485.1	NA	63245	IDBA_scaffold_8257:Leptopilina_heterotoma	4	1	34.9	739	470	0	2	740	15	737	1.329e-123	418	737	NA	NA	Drosophila-associated filamentous virus	NA	LbFV_like	LbFV_like	NA	NA	NA	NA	NA	NA	NA	NA	NA	NA	NA	NA	NA
358	LbFV_like	Cluster22585	2	scaffold_159:5336-7385(-):Leptopilina_boulardi	Leptopilina_boulardi	scaffold_159_5336-7385_-__Leptopilina_boulardi	scaffold_159:Leptopilina_boulardi	7	NA	NA	514	117.354	117.354	QKN22485.1	NA	44418	scaffold_159:Leptopilina_boulardi	7	60	37	683	415	0	1	683	79	737	2.455e-125	421	737	NA	NA	Drosophila-associated filamentous virus	NA	LbFV_like	LbFV_like	NA	NA	NA	NA	NA	NA	NA	NA	NA	NA	NA	NA	NA
358	LbFV_like	Cluster22585	2	scf7180005159507:662-2858(-):Leptopilina_clavipes	Leptopilina_clavipes	scf7180005159507_662-2858_-__Leptopilina_clavipes	scf7180005159507:Leptopilina_clavipes	NA	NA	NA	0	0	0	QKN22485.1	NA	47030	scf7180005159507:Leptopilina_clavipes	NA	0	34.8	732	464	0	1	732	26	737	4.219e-122	413	737	NA	NA	Drosophila-associated filamentous virus	NA	LbFV_like	LbFV_like	NA	NA	NA	NA	NA	NA	NA	NA	NA	NA	NA	NA	NA
358	LbFV_like	Cluster25244	1	IDBA_scaffold_13988:2185-2740(-):Leptopilina_heterotoma	Leptopilina_heterotoma	IDBA_scaffold_13988_2185-2740_-__Leptopilina_heterotoma	IDBA_scaffold_13988:Leptopilina_heterotoma	1	NA	NA	6	5.77253	5.77253	YP_009345698.1_CP_Varaldi-leptopilina	NA	170376	IDBA_scaffold_13988:Leptopilina_heterotoma	1	0	28.3	171	115	0	24	185	1	171	1.124e-13	73	182	552509	unclassified_viruses	Leptopilina_boulardi_filamentous_virus	NA	LbFV_like	LbFV_like	Viruses	NA	NA	NA	NA	NA	NA	NA	NA	NA	NA	NA	NA
358	LbFV_like	Cluster25244	1	scaffold_159:98032-98557(+):Leptopilina_boulardi	Leptopilina_boulardi	scaffold_159_98032-98557_+__Leptopilina_boulardi	scaffold_159:Leptopilina_boulardi	7	NA	NA	134	119.236	119.236	AQQ80014	NA	44419	scaffold_159:Leptopilina_boulardi	7	60	28.3	173	117	0	12	175	1	173	4.51e-14	74	182	552509	unclassified_viruses	Leptopilina_boulardi_filamentous_virus	NA	LbFV_like	LbFV_like	Viruses	NA	NA	NA	NA	NA	NA	NA	NA	NA	NA	NA	NA
358	LbFV_like	Cluster25244	1	scf7180005161552:2307-2790(-):Leptopilina_clavipes	Leptopilina_clavipes	scf7180005161552_2307-2790_-__Leptopilina_clavipes	scf7180005161552:Leptopilina_clavipes	NA	NA	NA	0	0	0	YP_009345698.1_CP_Varaldi-leptopilina	NA	170379	scf7180005161552:Leptopilina_clavipes	NA	0	28.4	161	105	0	10	157	1	161	8.942e-13	70	182	552509	unclassified_viruses	Leptopilina_boulardi_filamentous_virus	NA	LbFV_like	LbFV_like	Viruses	NA	NA	NA	NA	NA	NA	NA	NA	NA	NA	NA	NA
358	LbFV_like	Cluster26024	2	IDBA_scaffold_7081:3928-8890(-):Leptopilina_heterotoma	Leptopilina_heterotoma	IDBA_scaffold_7081_3928-8890_-__Leptopilina_heterotoma	IDBA_scaffold_7081:Leptopilina_heterotoma	NA	NA	NA	66	7.1136	7.1136	QKN22478.1	NA	106965	IDBA_scaffold_7081:Leptopilina_heterotoma	NA	0	29.9	1686	1158	0	1	1653	62	1747	9.547e-224	748	1747	NA	NA	Drosophila-associated filamentous virus	NA	LbFV_like	LbFV_like	NA	NA	NA	NA	NA	NA	NA	NA	NA	NA	NA	NA	NA
358	LbFV_like	Cluster26024	2	scaffold_1017:18402-23022(-):Leptopilina_clavipes	Leptopilina_clavipes	scaffold_1017_18402-23022_-__Leptopilina_clavipes	scaffold_1017:Leptopilina_clavipes	NA	NA	NA	0	0	0	QKN22478.1	NA	63628	scaffold_1017:Leptopilina_clavipes	NA	3	30.7	1564	1066	0	2	1540	128	1691	3.364e-217	724	1747	NA	NA	Drosophila-associated filamentous virus	NA	LbFV_like	LbFV_like	NA	NA	NA	NA	NA	NA	NA	NA	NA	NA	NA	NA	NA
358	LbFV_like	Cluster26024	2	scaffold_159:90038-94898(+):Leptopilina_boulardi	Leptopilina_boulardi	scaffold_159_90038-94898_+__Leptopilina_boulardi	scaffold_159:Leptopilina_boulardi	7	NA	NA	1033	99.4636	99.4636	QKN22478.1	NA	44382	scaffold_159:Leptopilina_boulardi	7	60	30.1	1674	1127	0	1	1614	68	1741	1.937e-225	752	1747	NA	NA	Drosophila-associated filamentous virus	NA	LbFV_like	LbFV_like	NA	NA	NA	NA	NA	NA	NA	NA	NA	NA	NA	NA	NA
358	LbFV_like	Cluster26675	6	scaffold_1324_0:359-1049(+):Leptopilina_heterotoma	Leptopilina_heterotoma	scaffold_1324_0_359-1049_+__Leptopilina_heterotoma	scaffold_1324_0:Leptopilina_heterotoma	NA	NA	NA	165	127.731	127.731	QKN22513.1	NA	63545	scaffold_1324_0:Leptopilina_heterotoma	NA	1	34.9	224	144	0	7	228	9	232	2.37e-32	130	233	NA	NA	Drosophila-associated filamentous virus	NA	LbFV_like	LbFV_like	NA	NA	NA	NA	NA	NA	NA	NA	NA	NA	NA	NA	NA
358	LbFV_like	Cluster26675	6	scaffold_159:190157-190841(-):Leptopilina_boulardi	Leptopilina_boulardi	scaffold_159_190157-190841_-__Leptopilina_boulardi	scaffold_159:Leptopilina_boulardi	7	NA	NA	1864	1273.64	1273.64	AQQ80005	NA	44394	scaffold_159:Leptopilina_boulardi	7	60	34.5	216	136	0	9	224	5	212	3.242e-30	123	215	552509	unclassified_viruses	Leptopilina_boulardi_filamentous_virus	NA	LbFV_like	LbFV_like	Viruses	NA	NA	NA	NA	NA	NA	NA	NA	NA	NA	NA	NA
358	LbFV_like	Cluster26675	6	scf7180005171671:3001-3682(+):Leptopilina_clavipes	Leptopilina_clavipes	scf7180005171671_3001-3682_+__Leptopilina_clavipes	scf7180005171671:Leptopilina_clavipes	NA	NA	NA	0	0	0	QKN22513.1	NA	166369	scf7180005171671:Leptopilina_clavipes	NA	0	32.6	230	152	0	1	227	3	232	2.773e-29	121	233	NA	NA	Drosophila-associated filamentous virus	NA	LbFV_like	LbFV_like	NA	NA	NA	NA	NA	NA	NA	NA	NA	NA	NA	NA	NA
358	LbFV_like	Cluster27203	5	IDBA_scaffold_5653:1292-5210(-):Leptopilina_heterotoma	Leptopilina_heterotoma	IDBA_scaffold_5653_1292-5210_-__Leptopilina_heterotoma	IDBA_scaffold_5653:Leptopilina_heterotoma	NA	NA	NA	239	32.6221	32.6221	YP_009345662.1_CP_Varaldi-leptopilina	NA	63223	IDBA_scaffold_5653:Leptopilina_heterotoma	NA	1	32.4	1306	859	0	1	1306	17	1288	5.062e-198	659	1308	552509	unclassified_viruses	Leptopilina_boulardi_filamentous_virus	NA	LbFV_like	LbFV_like	Viruses	NA	NA	NA	NA	NA	NA	NA	NA	NA	NA	NA	NA
358	LbFV_like	Cluster27203	5	scaffold_2503_0:10731-14478(+):Leptopilina_boulardi	Leptopilina_boulardi	scaffold_2503_0_10731-14478_+__Leptopilina_boulardi	scaffold_2503_0:Leptopilina_boulardi	NA	NA	NA	538	67.185	67.185	AQQ79978	NA	66037	scaffold_2503_0:Leptopilina_boulardi	NA	1	32.9	1281	837	0	1	1249	11	1291	8.599e-200	662	1308	552509	unclassified_viruses	Leptopilina_boulardi_filamentous_virus	NA	LbFV_like	LbFV_like	Viruses	NA	NA	NA	NA	NA	NA	NA	NA	NA	NA	NA	NA
358	LbFV_like	Cluster27203	5	scf7180005154334:13722-16701(-):Leptopilina_clavipes	Leptopilina_clavipes	scf7180005154334_13722-16701_-__Leptopilina_clavipes	scf7180005154334:Leptopilina_clavipes	NA	NA	NA	0	0	0	YP_009345662.1_CP_Varaldi-leptopilina	NA	64131	scf7180005154334:Leptopilina_clavipes	NA	1	32.4	997	671	0	1	993	292	1288	2.313e-149	504	1308	552509	unclassified_viruses	Leptopilina_boulardi_filamentous_virus	NA	LbFV_like	LbFV_like	Viruses	NA	NA	NA	NA	NA	NA	NA	NA	NA	NA	NA	NA
358	LbFV_like	Cluster27203	5	scf7180005155932_0:0-1653(-):Leptopilina_clavipes	Leptopilina_clavipes	scf7180005155932_0_0-1653_-__Leptopilina_clavipes	scf7180005155932_0:Leptopilina_clavipes	NA	NA	NA	0	0	0	YP_009345662.1_CP_Varaldi-leptopilina	NA	165717	scf7180005155932_0:Leptopilina_clavipes	NA	0	38.2	555	340	0	1	551	17	571	4.289e-106	359	1308	552509	unclassified_viruses	Leptopilina_boulardi_filamentous_virus	NA	LbFV_like	LbFV_like	Viruses	NA	NA	NA	NA	NA	NA	NA	NA	NA	NA	NA	NA
358	LbFV_like	Cluster27528	1	IDBA_scaffold_7081:4445-4694(+):Leptopilina_heterotoma	Leptopilina_heterotoma	IDBA_scaffold_7081_4445-4694_+__Leptopilina_heterotoma	IDBA_scaffold_7081:Leptopilina_heterotoma	NA	NA	NA	2	4.27937	4.27937	QKN22482.1	NA	106969	IDBA_scaffold_7081:Leptopilina_heterotoma	NA	0	42.3	84	47	0	1	83	25	108	1.08e-12	66	125	NA	NA	Drosophila-associated filamentous virus	NA	LbFV_like	LbFV_like	NA	NA	NA	NA	NA	NA	NA	NA	NA	NA	NA	NA	NA
358	LbFV_like	Cluster27528	1	scaffold_1017:18754-19003(+):Leptopilina_clavipes	Leptopilina_clavipes	scaffold_1017_18754-19003_+__Leptopilina_clavipes	scaffold_1017:Leptopilina_clavipes	NA	NA	NA	0	0	0	QKN22482.1	NA	63631	scaffold_1017:Leptopilina_clavipes	NA	3	42.1	84	47	0	1	83	25	108	1.484e-12	65	125	NA	NA	Drosophila-associated filamentous virus	NA	LbFV_like	LbFV_like	NA	NA	NA	NA	NA	NA	NA	NA	NA	NA	NA	NA	NA
358	LbFV_like	Cluster27528	1	scaffold_159:94129-94399(-):Leptopilina_boulardi	Leptopilina_boulardi	scaffold_159_94129-94399_-__Leptopilina_boulardi	scaffold_159:Leptopilina_boulardi	7	NA	NA	89	153.713	153.713	QKN22482.1	NA	44422	scaffold_159:Leptopilina_boulardi	7	60	39.5	91	54	0	1	90	18	108	2.779e-12	65	125	NA	NA	Drosophila-associated filamentous virus	NA	LbFV_like	LbFV_like	NA	NA	NA	NA	NA	NA	NA	NA	NA	NA	NA	NA	NA
358	LbFV_like	Cluster5559	1	IDBA_scaffold_5653:5878-6409(+):Leptopilina_heterotoma	Leptopilina_heterotoma	IDBA_scaffold_5653_5878-6409_+__Leptopilina_heterotoma	IDBA_scaffold_5653:Leptopilina_heterotoma	NA	NA	NA	30	30.1647	30.1647	QKN22515.1	NA	63227	IDBA_scaffold_5653:Leptopilina_heterotoma	NA	1	30.5	177	115	0	1	177	11	176	1.084e-17	85	183	NA	NA	Drosophila-associated filamentous virus	NA	LbFV_like	LbFV_like	NA	NA	NA	NA	NA	NA	NA	NA	NA	NA	NA	NA	NA
358	LbFV_like	Cluster5559	1	scaffold_2503_0:8110-8659(-):Leptopilina_boulardi	Leptopilina_boulardi	scaffold_2503_0_8110-8659_-__Leptopilina_boulardi	scaffold_2503_0:Leptopilina_boulardi	NA	NA	NA	103	87.6525	87.6525	QKN22515.1	NA	66042	scaffold_2503_0:Leptopilina_boulardi	NA	1	31.5	183	112	0	1	183	11	174	4.832e-20	92	183	NA	NA	Drosophila-associated filamentous virus	NA	LbFV_like	LbFV_like	NA	NA	NA	NA	NA	NA	NA	NA	NA	NA	NA	NA	NA
358	LbFV_like	Cluster5559	1	scaffold_886_1:4432-4993(+):Leptopilina_clavipes	Leptopilina_clavipes	scaffold_886_1_4432-4993_+__Leptopilina_clavipes	scaffold_886_1:Leptopilina_clavipes	NA	NA	NA	0	0	0	QKN22515.1	NA	63799	scaffold_886_1:Leptopilina_clavipes	NA	1	31.9	181	112	0	1	181	11	176	2.958e-20	93	183	NA	NA	Drosophila-associated filamentous virus	NA	LbFV_like	LbFV_like	NA	NA	NA	NA	NA	NA	NA	NA	NA	NA	NA	NA	NA
275	IVSPERs	Cluster10664	1	scaffold_36_0:21693-21927(+):Campopleginae	Campopleginae	scaffold_36_0_21693-21927_+__Campopleginae	scaffold_36_0:Campopleginae	NA	NA	NA	NA	NA	NA	ADI40481.1_CP_Volkoff-hyposoter	NA	87300	scaffold_36_0:Campopleginae	NA	21	43.6	80	43	0	1	78	1	80	1.181e-12	65	85	260305	cellular_organisms	Hyposoter_didymator	Hyposoter	IVSPERs	IVSPERs	Eukaryota	Campopleginae	Ichneumonoidea	Parasitoida	Apocrita	Hymenoptera	Holometabola	Neoptera	Pterygota	Insecta	Hexapoda	Arthropoda	Metazoa
275	IVSPERs	Cluster11128	1	scaffold_869:34341-35739(-):Campopleginae	Campopleginae	scaffold_869_34341-35739_-__Campopleginae	scaffold_869:Campopleginae	NA	NA	NA	NA	NA	NA	ADI40459.1_CP_Volkoff-hyposoter	NA	87334	scaffold_869:Campopleginae	NA	20	67.6	509	151	0	1	466	1	509	3.729e-220	685	509	260305	cellular_organisms	Hyposoter_didymator	Hyposoter	IVSPERs	IVSPERs	Eukaryota	Campopleginae	Ichneumonoidea	Parasitoida	Apocrita	Hymenoptera	Holometabola	Neoptera	Pterygota	Insecta	Hexapoda	Arthropoda	Metazoa
275	IVSPERs	Cluster11128	2	scaffold_998:6140-7667(-):Campopleginae	Campopleginae	scaffold_998_6140-7667_-__Campopleginae	scaffold_998:Campopleginae	NA	NA	NA	NA	NA	NA	ADI40459.1_CP_Volkoff-hyposoter	NA	87363	scaffold_998:Campopleginae	NA	12	56.8	509	219	0	1	509	1	509	2.663e-174	555	509	260305	cellular_organisms	Hyposoter_didymator	Hyposoter	IVSPERs	IVSPERs	Eukaryota	Campopleginae	Ichneumonoidea	Parasitoida	Apocrita	Hymenoptera	Holometabola	Neoptera	Pterygota	Insecta	Hexapoda	Arthropoda	Metazoa
275	IVSPERs	Cluster11316	1	scaffold_869:39365-39848(-):Campopleginae	Campopleginae	scaffold_869_39365-39848_-__Campopleginae	scaffold_869:Campopleginae	NA	NA	NA	NA	NA	NA	ADI40455.1_CP_Volkoff-hyposoter	NA	87340	scaffold_869:Campopleginae	NA	20	80.6	162	31	0	1	161	1	162	3.028e-82	270	162	260305	cellular_organisms	Hyposoter_didymator	Hyposoter	IVSPERs	IVSPERs	Eukaryota	Campopleginae	Ichneumonoidea	Parasitoida	Apocrita	Hymenoptera	Holometabola	Neoptera	Pterygota	Insecta	Hexapoda	Arthropoda	Metazoa
275	IVSPERs	Cluster12414	1	scaffold_998:20916-21147(+):Campopleginae	Campopleginae	scaffold_998_20916-21147_+__Campopleginae	scaffold_998:Campopleginae	NA	NA	NA	NA	NA	NA	ADI40466.1_CP_Volkoff-hyposoter	NA	87369	scaffold_998:Campopleginae	NA	12	63.4	77	28	0	1	77	1	77	2.149e-24	99	77	260305	cellular_organisms	Hyposoter_didymator	Hyposoter	IVSPERs	IVSPERs	Eukaryota	Campopleginae	Ichneumonoidea	Parasitoida	Apocrita	Hymenoptera	Holometabola	Neoptera	Pterygota	Insecta	Hexapoda	Arthropoda	Metazoa
275	IVSPERs	Cluster12952	1	scaffold_998:19505-20327(+):Campopleginae	Campopleginae	scaffold_998_19505-20327_+__Campopleginae	scaffold_998:Campopleginae	NA	NA	NA	NA	NA	NA	ADI40467.1_CP_Volkoff-hyposoter	NA	87367	scaffold_998:Campopleginae	NA	12	84.3	274	43	0	1	274	1	274	1.521e-152	479	274	260305	cellular_organisms	Hyposoter_didymator	Hyposoter	IVSPERs	IVSPERs	Eukaryota	Campopleginae	Ichneumonoidea	Parasitoida	Apocrita	Hymenoptera	Holometabola	Neoptera	Pterygota	Insecta	Hexapoda	Arthropoda	Metazoa
275	IVSPERs	Cluster12953	1	scaffold_36_0:23896-25876(+):Campopleginae	Campopleginae	scaffold_36_0_23896-25876_+__Campopleginae	scaffold_36_0:Campopleginae	NA	NA	NA	NA	NA	NA	ADI40483.1_CP_Volkoff-hyposoter	NA	87301	scaffold_36_0:Campopleginae	NA	21	85.2	660	98	0	1	660	1	660	0	1165	660	260305	cellular_organisms	Hyposoter_didymator	Hyposoter	IVSPERs	IVSPERs	Eukaryota	Campopleginae	Ichneumonoidea	Parasitoida	Apocrita	Hymenoptera	Holometabola	Neoptera	Pterygota	Insecta	Hexapoda	Arthropoda	Metazoa
275	IVSPERs	Cluster13893	1	scaffold_36_0:29571-29778(+):Campopleginae	Campopleginae	scaffold_36_0_29571-29778_+__Campopleginae	scaffold_36_0:Campopleginae	NA	NA	NA	NA	NA	NA	ADI40485.1_CP_Volkoff-hyposoter	NA	87309	scaffold_36_0:Campopleginae	NA	21	78.6	69	15	0	1	69	1	69	1.163e-29	113	70	260305	cellular_organisms	Hyposoter_didymator	Hyposoter	IVSPERs	IVSPERs	Eukaryota	Campopleginae	Ichneumonoidea	Parasitoida	Apocrita	Hymenoptera	Holometabola	Neoptera	Pterygota	Insecta	Hexapoda	Arthropoda	Metazoa
275	IVSPERs	Cluster14323	1	scaffold_36_0:18542-20381(-):Campopleginae	Campopleginae	scaffold_36_0_18542-20381_-__Campopleginae	scaffold_36_0:Campopleginae	NA	NA	NA	NA	NA	NA	ADI40479.1_CP_Volkoff-hyposoter	NA	87311	scaffold_36_0:Campopleginae	NA	21	90.3	613	59	0	1	613	1	612	0	1157	612	260305	cellular_organisms	Hyposoter_didymator	Hyposoter	IVSPERs	IVSPERs	Eukaryota	Campopleginae	Ichneumonoidea	Parasitoida	Apocrita	Hymenoptera	Holometabola	Neoptera	Pterygota	Insecta	Hexapoda	Arthropoda	Metazoa
275	IVSPERs	Cluster14888	1	scaffold_998:13057-13996(-):Campopleginae	Campopleginae	scaffold_998_13057-13996_-__Campopleginae	scaffold_998:Campopleginae	NA	NA	NA	NA	NA	NA	ADI40469.1_CP_Volkoff-hyposoter	NA	87368	scaffold_998:Campopleginae	NA	12	85.5	316	45	0	1	313	1	316	3.159e-180	561	316	260305	cellular_organisms	Hyposoter_didymator	Hyposoter	IVSPERs	IVSPERs	Eukaryota	Campopleginae	Ichneumonoidea	Parasitoida	Apocrita	Hymenoptera	Holometabola	Neoptera	Pterygota	Insecta	Hexapoda	Arthropoda	Metazoa
275	IVSPERs	Cluster16262	1	scaffold_36_0:22632-22857(+):Campopleginae	Campopleginae	scaffold_36_0_22632-22857_+__Campopleginae	scaffold_36_0:Campopleginae	NA	NA	NA	NA	NA	NA	ADI40482.1_CP_Volkoff-hyposoter	NA	87304	scaffold_36_0:Campopleginae	NA	21	56.6	75	32	0	1	75	1	75	2.449e-19	84	77	260305	cellular_organisms	Hyposoter_didymator	Hyposoter	IVSPERs	IVSPERs	Eukaryota	Campopleginae	Ichneumonoidea	Parasitoida	Apocrita	Hymenoptera	Holometabola	Neoptera	Pterygota	Insecta	Hexapoda	Arthropoda	Metazoa
275	IVSPERs	Cluster16867	2	scaffold_869:29288-29795(+):Campopleginae	Campopleginae	scaffold_869_29288-29795_+__Campopleginae	scaffold_869:Campopleginae	NA	NA	NA	NA	NA	NA	ADI40491.1_CP_Volkoff-hyposoter	NA	87327	scaffold_869:Campopleginae	NA	20	37.6	167	102	0	5	169	313	479	5.733e-26	108	492	260305	cellular_organisms	Hyposoter_didymator	Hyposoter	IVSPERs	IVSPERs	Eukaryota	Campopleginae	Ichneumonoidea	Parasitoida	Apocrita	Hymenoptera	Holometabola	Neoptera	Pterygota	Insecta	Hexapoda	Arthropoda	Metazoa
275	IVSPERs	Cluster16867	3	scaffold_869:32349-33729(-):Campopleginae	Campopleginae	scaffold_869_32349-33729_-__Campopleginae	scaffold_869:Campopleginae	NA	NA	NA	NA	NA	NA	ADI40460.1_CP_Volkoff-hyposoter	NA	87329	scaffold_869:Campopleginae	NA	20	57.8	466	183	0	27	460	5	470	1.204e-162	519	470	260305	cellular_organisms	Hyposoter_didymator	Hyposoter	IVSPERs	IVSPERs	Eukaryota	Campopleginae	Ichneumonoidea	Parasitoida	Apocrita	Hymenoptera	Holometabola	Neoptera	Pterygota	Insecta	Hexapoda	Arthropoda	Metazoa
275	IVSPERs	Cluster16867	4	scaffold_36_0:37799-39269(+):Campopleginae	Campopleginae	scaffold_36_0_37799-39269_+__Campopleginae	scaffold_36_0:Campopleginae	NA	NA	NA	NA	NA	NA	ADI40491.1_CP_Volkoff-hyposoter	NA	87295	scaffold_36_0:Campopleginae	NA	21	81.3	492	91	0	1	490	1	492	2.166e-267	823	492	260305	cellular_organisms	Hyposoter_didymator	Hyposoter	IVSPERs	IVSPERs	Eukaryota	Campopleginae	Ichneumonoidea	Parasitoida	Apocrita	Hymenoptera	Holometabola	Neoptera	Pterygota	Insecta	Hexapoda	Arthropoda	Metazoa
275	IVSPERs	Cluster16867	5	scaffold_998:3230-4511(-):Campopleginae	Campopleginae	scaffold_998_3230-4511_-__Campopleginae	scaffold_998:Campopleginae	NA	NA	NA	NA	NA	NA	ADI40491.1_CP_Pichon-venturia	NA	87358	scaffold_998:Campopleginae	NA	12	50.6	487	208	0	5	427	5	491	1.189e-142	459	492	260305	cellular_organisms	Hyposoter_didymator	Hyposoter	IVSPERs	IVSPERs	Eukaryota	Campopleginae	Ichneumonoidea	Parasitoida	Apocrita	Hymenoptera	Holometabola	Neoptera	Pterygota	Insecta	Hexapoda	Arthropoda	Metazoa
275	IVSPERs	Cluster17553	1	scaffold_869:41536-42292(-):Campopleginae	Campopleginae	scaffold_869_41536-42292_-__Campopleginae	scaffold_869:Campopleginae	NA	NA	NA	NA	NA	NA	ADI40453.1_CP_Volkoff-hyposoter	NA	87333	scaffold_869:Campopleginae	NA	20	65	253	88	0	1	252	1	253	3.675e-100	327	253	260305	cellular_organisms	Hyposoter_didymator	Hyposoter	IVSPERs	IVSPERs	Eukaryota	Campopleginae	Ichneumonoidea	Parasitoida	Apocrita	Hymenoptera	Holometabola	Neoptera	Pterygota	Insecta	Hexapoda	Arthropoda	Metazoa
275	IVSPERs	Cluster17553	2	scaffold_998:24011-24692(-):Campopleginae	Campopleginae	scaffold_998_24011-24692_-__Campopleginae	scaffold_998:Campopleginae	NA	NA	NA	NA	NA	NA	ADI40464.1_CP_Volkoff-hyposoter	NA	87361	scaffold_998:Campopleginae	NA	12	66.2	194	65	0	34	227	1	194	2.7e-76	257	196	260305	cellular_organisms	Hyposoter_didymator	Hyposoter	IVSPERs	IVSPERs	Eukaryota	Campopleginae	Ichneumonoidea	Parasitoida	Apocrita	Hymenoptera	Holometabola	Neoptera	Pterygota	Insecta	Hexapoda	Arthropoda	Metazoa
275	IVSPERs	Cluster18062	1	scaffold_869:38576-38930(-):Campopleginae	Campopleginae	scaffold_869_38576-38930_-__Campopleginae	scaffold_869:Campopleginae	NA	NA	NA	NA	NA	NA	ADI40456.1_CP_Volkoff-hyposoter	NA	87339	scaffold_869:Campopleginae	NA	20	60.1	122	47	0	1	118	7	128	1.221e-39	145	131	260305	cellular_organisms	Hyposoter_didymator	Hyposoter	IVSPERs	IVSPERs	Eukaryota	Campopleginae	Ichneumonoidea	Parasitoida	Apocrita	Hymenoptera	Holometabola	Neoptera	Pterygota	Insecta	Hexapoda	Arthropoda	Metazoa
275	IVSPERs	Cluster1826	1	scaffold_36_0:15860-17765(+):Campopleginae	Campopleginae	scaffold_36_0_15860-17765_+__Campopleginae	scaffold_36_0:Campopleginae	NA	NA	NA	NA	NA	NA	ADI40478.1_CP_Volkoff-hyposoter	NA	87288	scaffold_36_0:Campopleginae	NA	21	72.4	527	145	0	109	635	3	527	2.548e-246	770	527	260305	cellular_organisms	Hyposoter_didymator	Hyposoter	IVSPERs	IVSPERs	Eukaryota	Campopleginae	Ichneumonoidea	Parasitoida	Apocrita	Hymenoptera	Holometabola	Neoptera	Pterygota	Insecta	Hexapoda	Arthropoda	Metazoa
275	IVSPERs	Cluster1826	2	scaffold_998:21678-23559(-):Campopleginae	Campopleginae	scaffold_998_21678-23559_-__Campopleginae	scaffold_998:Campopleginae	NA	NA	NA	NA	NA	NA	ADI40465.1_CP_Volkoff-hyposoter	NA	87350	scaffold_998:Campopleginae	NA	12	73.7	628	165	0	1	627	3	630	4.422e-304	937	630	260305	cellular_organisms	Hyposoter_didymator	Hyposoter	IVSPERs	IVSPERs	Eukaryota	Campopleginae	Ichneumonoidea	Parasitoida	Apocrita	Hymenoptera	Holometabola	Neoptera	Pterygota	Insecta	Hexapoda	Arthropoda	Metazoa
275	IVSPERs	Cluster1828	1	scaffold_36_0:33777-34974(+):Campopleginae	Campopleginae	scaffold_36_0_33777-34974_+__Campopleginae	scaffold_36_0:Campopleginae	NA	NA	NA	NA	NA	NA	ADI40489.1_CP_Volkoff-hyposoter	NA	87306	scaffold_36_0:Campopleginae	NA	21	64.8	399	139	0	1	399	1	395	2.537e-161	512	395	260305	cellular_organisms	Hyposoter_didymator	Hyposoter	IVSPERs	IVSPERs	Eukaryota	Campopleginae	Ichneumonoidea	Parasitoida	Apocrita	Hymenoptera	Holometabola	Neoptera	Pterygota	Insecta	Hexapoda	Arthropoda	Metazoa
275	IVSPERs	Cluster1828	2	scaffold_869:37077-38079(-):Campopleginae	Campopleginae	scaffold_869_37077-38079_-__Campopleginae	scaffold_869:Campopleginae	NA	NA	NA	NA	NA	NA	ADI40457.1_CP_Volkoff-hyposoter	NA	87341	scaffold_869:Campopleginae	NA	20	49.2	334	169	0	1	334	1	333	7.145e-91	304	333	260305	cellular_organisms	Hyposoter_didymator	Hyposoter	IVSPERs	IVSPERs	Eukaryota	Campopleginae	Ichneumonoidea	Parasitoida	Apocrita	Hymenoptera	Holometabola	Neoptera	Pterygota	Insecta	Hexapoda	Arthropoda	Metazoa
275	IVSPERs	Cluster18601	1	scaffold_998:15068-19142(-):Campopleginae	Campopleginae	scaffold_998_15068-19142_-__Campopleginae	scaffold_998:Campopleginae	NA	NA	NA	NA	NA	NA	ADI40468.1_CP_Volkoff-hyposoter	NA	87352	scaffold_998:Campopleginae	NA	12	86.6	1358	181	0	1	1358	1	1355	0	2439	1355	260305	cellular_organisms	Hyposoter_didymator	Hyposoter	IVSPERs	IVSPERs	Eukaryota	Campopleginae	Ichneumonoidea	Parasitoida	Apocrita	Hymenoptera	Holometabola	Neoptera	Pterygota	Insecta	Hexapoda	Arthropoda	Metazoa
275	IVSPERs	Cluster20806	1	scaffold_36_0:28179-28938(-):Campopleginae	Campopleginae	scaffold_36_0_28179-28938_-__Campopleginae	scaffold_36_0:Campopleginae	NA	NA	NA	NA	NA	NA	ADI40487.1_CP_Volkoff-hyposoter	NA	87302	scaffold_36_0:Campopleginae	NA	21	54.9	254	114	0	1	253	1	254	2.302e-79	267	257	260305	cellular_organisms	Hyposoter_didymator	Hyposoter	IVSPERs	IVSPERs	Eukaryota	Campopleginae	Ichneumonoidea	Parasitoida	Apocrita	Hymenoptera	Holometabola	Neoptera	Pterygota	Insecta	Hexapoda	Arthropoda	Metazoa
275	IVSPERs	Cluster20806	1	scaffold_36_0:30723-31155(-):Campopleginae	Campopleginae	scaffold_36_0_30723-31155_-__Campopleginae	scaffold_36_0:Campopleginae	NA	NA	NA	NA	NA	NA	ADI40487.1_CP_Volkoff-hyposoter	NA	87303	scaffold_36_0:Campopleginae	NA	21	63.2	144	52	0	1	144	46	188	9.613e-52	181	257	260305	cellular_organisms	Hyposoter_didymator	Hyposoter	IVSPERs	IVSPERs	Eukaryota	Campopleginae	Ichneumonoidea	Parasitoida	Apocrita	Hymenoptera	Holometabola	Neoptera	Pterygota	Insecta	Hexapoda	Arthropoda	Metazoa
275	IVSPERs	Cluster22471	1	scaffold_36_0:14339-15566(-):Campopleginae	Campopleginae	scaffold_36_0_14339-15566_-__Campopleginae	scaffold_36_0:Campopleginae	NA	NA	NA	NA	NA	NA	ADI40477.1_CP_Volkoff-hyposoter	NA	87297	scaffold_36_0:Campopleginae	NA	21	73.7	410	107	0	1	409	1	410	7.739e-196	612	410	260305	cellular_organisms	Hyposoter_didymator	Hyposoter	IVSPERs	IVSPERs	Eukaryota	Campopleginae	Ichneumonoidea	Parasitoida	Apocrita	Hymenoptera	Holometabola	Neoptera	Pterygota	Insecta	Hexapoda	Arthropoda	Metazoa
275	IVSPERs	Cluster22587	1	scaffold_36_0:20707-20941(+):Campopleginae	Campopleginae	scaffold_36_0_20707-20941_+__Campopleginae	scaffold_36_0:Campopleginae	NA	NA	NA	NA	NA	NA	ADI40480.1_CP_Volkoff-hyposoter	NA	87298	scaffold_36_0:Campopleginae	NA	21	64.1	78	28	0	1	78	1	78	3.365e-25	101	82	260305	cellular_organisms	Hyposoter_didymator	Hyposoter	IVSPERs	IVSPERs	Eukaryota	Campopleginae	Ichneumonoidea	Parasitoida	Apocrita	Hymenoptera	Holometabola	Neoptera	Pterygota	Insecta	Hexapoda	Arthropoda	Metazoa
275	IVSPERs	Cluster22765	1	scaffold_869:42988-43720(-):Campopleginae	Campopleginae	scaffold_869_42988-43720_-__Campopleginae	scaffold_869:Campopleginae	NA	NA	NA	NA	NA	NA	ADI40452.1_CP_Volkoff-hyposoter	NA	87336	scaffold_869:Campopleginae	NA	20	68.2	244	77	0	1	244	1	244	1.216e-102	334	244	260305	cellular_organisms	Hyposoter_didymator	Hyposoter	IVSPERs	IVSPERs	Eukaryota	Campopleginae	Ichneumonoidea	Parasitoida	Apocrita	Hymenoptera	Holometabola	Neoptera	Pterygota	Insecta	Hexapoda	Arthropoda	Metazoa
275	IVSPERs	Cluster23006	1	scaffold_36_0:32325-33537(-):Campopleginae	Campopleginae	scaffold_36_0_32325-33537_-__Campopleginae	scaffold_36_0:Campopleginae	NA	NA	NA	NA	NA	NA	ADI40488.1_CP_Volkoff-hyposoter	NA	87299	scaffold_36_0:Campopleginae	NA	21	72.3	401	111	0	1	401	1	400	8.905e-187	586	415	260305	cellular_organisms	Hyposoter_didymator	Hyposoter	IVSPERs	IVSPERs	Eukaryota	Campopleginae	Ichneumonoidea	Parasitoida	Apocrita	Hymenoptera	Holometabola	Neoptera	Pterygota	Insecta	Hexapoda	Arthropoda	Metazoa
275	IVSPERs	Cluster23555	1	scaffold_36_0:35225-36905(-):Campopleginae	Campopleginae	scaffold_36_0_35225-36905_-__Campopleginae	scaffold_36_0:Campopleginae	NA	NA	NA	NA	NA	NA	ADI40490.1_CP_Volkoff-hyposoter	NA	87310	scaffold_36_0:Campopleginae	NA	21	79	563	117	0	1	560	1	563	3.161e-296	910	563	260305	cellular_organisms	Hyposoter_didymator	Hyposoter	IVSPERs	IVSPERs	Eukaryota	Campopleginae	Ichneumonoidea	Parasitoida	Apocrita	Hymenoptera	Holometabola	Neoptera	Pterygota	Insecta	Hexapoda	Arthropoda	Metazoa
275	IVSPERs	Cluster24593	1	scaffold_998:10310-10649(-):Campopleginae	Campopleginae	scaffold_998_10310-10649_-__Campopleginae	scaffold_998:Campopleginae	NA	NA	NA	NA	NA	NA	ADI40472.1_CP_Volkoff-hyposoter	NA	87370	scaffold_998:Campopleginae	NA	12	35.9	113	62	0	1	113	4	100	1.184e-13	70	100	260305	cellular_organisms	Hyposoter_didymator	Hyposoter	IVSPERs	IVSPERs	Eukaryota	Campopleginae	Ichneumonoidea	Parasitoida	Apocrita	Hymenoptera	Holometabola	Neoptera	Pterygota	Insecta	Hexapoda	Arthropoda	Metazoa
275	IVSPERs	Cluster24594	1	scaffold_998:11123-11564(-):Campopleginae	Campopleginae	scaffold_998_11123-11564_-__Campopleginae	scaffold_998:Campopleginae	NA	NA	NA	NA	NA	NA	ADI40471.1_CP_Volkoff-hyposoter	NA	87359	scaffold_998:Campopleginae	NA	12	48.6	151	75	0	1	147	1	151	1.794e-36	138	152	260305	cellular_organisms	Hyposoter_didymator	Hyposoter	IVSPERs	IVSPERs	Eukaryota	Campopleginae	Ichneumonoidea	Parasitoida	Apocrita	Hymenoptera	Holometabola	Neoptera	Pterygota	Insecta	Hexapoda	Arthropoda	Metazoa
275	IVSPERs	Cluster26083	1	scaffold_869:40412-41096(-):Campopleginae	Campopleginae	scaffold_869_40412-41096_-__Campopleginae	scaffold_869:Campopleginae	NA	NA	NA	NA	NA	NA	ADI40454.1_CP_Volkoff-hyposoter	NA	87338	scaffold_869:Campopleginae	NA	20	82.4	228	40	0	1	228	1	228	4.035e-122	389	228	260305	cellular_organisms	Hyposoter_didymator	Hyposoter	IVSPERs	IVSPERs	Eukaryota	Campopleginae	Ichneumonoidea	Parasitoida	Apocrita	Hymenoptera	Holometabola	Neoptera	Pterygota	Insecta	Hexapoda	Arthropoda	Metazoa
275	IVSPERs	Cluster26688	1	scaffold_998:26129-27176(-):Campopleginae	Campopleginae	scaffold_998_26129-27176_-__Campopleginae	scaffold_998:Campopleginae	NA	NA	NA	NA	NA	NA	ADI40462.1_CP_Volkoff-hyposoter	NA	87365	scaffold_998:Campopleginae	NA	12	92.6	349	26	0	1	349	1	349	3.826e-220	679	349	260305	cellular_organisms	Hyposoter_didymator	Hyposoter	IVSPERs	IVSPERs	Eukaryota	Campopleginae	Ichneumonoidea	Parasitoida	Apocrita	Hymenoptera	Holometabola	Neoptera	Pterygota	Insecta	Hexapoda	Arthropoda	Metazoa
275	IVSPERs	Cluster27592	1	scaffold_998:11830-12439(+):Campopleginae	Campopleginae	scaffold_998_11830-12439_+__Campopleginae	scaffold_998:Campopleginae	NA	NA	NA	NA	NA	NA	ADI40470.1_CP_Volkoff-hyposoter	NA	87372	scaffold_998:Campopleginae	NA	12	89.2	203	22	0	1	203	1	203	2.428e-119	379	203	260305	cellular_organisms	Hyposoter_didymator	Hyposoter	IVSPERs	IVSPERs	Eukaryota	Campopleginae	Ichneumonoidea	Parasitoida	Apocrita	Hymenoptera	Holometabola	Neoptera	Pterygota	Insecta	Hexapoda	Arthropoda	Metazoa
275	IVSPERs	Cluster336	1	scaffold_998:24875-25490(-):Campopleginae	Campopleginae	scaffold_998_24875-25490_-__Campopleginae	scaffold_998:Campopleginae	NA	NA	NA	NA	NA	NA	ADI40463.1_CP_Volkoff-hyposoter	NA	87366	scaffold_998:Campopleginae	NA	12	70.1	212	61	0	1	205	1	212	1.232e-91	300	212	260305	cellular_organisms	Hyposoter_didymator	Hyposoter	IVSPERs	IVSPERs	Eukaryota	Campopleginae	Ichneumonoidea	Parasitoida	Apocrita	Hymenoptera	Holometabola	Neoptera	Pterygota	Insecta	Hexapoda	Arthropoda	Metazoa
275	IVSPERs	Cluster3513	1	scaffold_629:44066-44330(-):Campopleginae	Campopleginae	scaffold_629_44066-44330_-__Campopleginae	scaffold_629:Campopleginae	NA	NA	NA	NA	NA	NA	BAF73402.1_CP_Pichon-venturia	NA	46058	scaffold_629:Campopleginae	NA	20	55.4	57	25	0	13	68	12	68	9.063e-12	63	226	74492	unclassified_Ichnovirus	Tranosema_rostrale_ichnovirus	Ichnovirus	IVSPERs	Nudiviridae	Viruses	NA	NA	NA	NA	NA	NA	NA	NA	NA	NA	NA	NA
275	IVSPERs	Cluster3513	12	scaffold_250:51864-52269(-):Campopleginae	Campopleginae	scaffold_250_51864-52269_-__Campopleginae	scaffold_250:Campopleginae	NA	NA	NA	NA	NA	NA	BAF45627.1_CP_Pichon-venturia	NA	87285	scaffold_250:Campopleginae	NA	18	51.9	86	41	0	1	86	52	137	5.007e-19	87	233	74492	unclassified_Ichnovirus	Tranosema_rostrale_ichnovirus	Ichnovirus	IVSPERs	Nudiviridae	Viruses	NA	NA	NA	NA	NA	NA	NA	NA	NA	NA	NA	NA
275	IVSPERs	Cluster3513	13	scaffold_1062:107859-108369(+):Campopleginae	Campopleginae	scaffold_1062_107859-108369_+__Campopleginae	scaffold_1062:Campopleginae	7	NA	NA	NA	NA	NA	BAF73402.1_CP_Pichon-venturia	NA	87216	scaffold_1062:Campopleginae	7	15	38.5	135	79	0	38	166	64	198	4.234e-20	91	226	74492	unclassified_Ichnovirus	Tranosema_rostrale_ichnovirus	Ichnovirus	IVSPERs	Nudiviridae	Viruses	NA	NA	NA	NA	NA	NA	NA	NA	NA	NA	NA	NA
275	IVSPERs	Cluster3513	2	scaffold_280:40760-41396(+):Campopleginae	Campopleginae	scaffold_280_40760-41396_+__Campopleginae	scaffold_280:Campopleginae	NA	NA	NA	NA	NA	NA	BAF45626.1_CP_Pichon-venturia	NA	45513	scaffold_280:Campopleginae	NA	26	44	193	105	0	8	200	14	201	4.626e-41	154	237	74492	unclassified_Ichnovirus	Tranosema_rostrale_ichnovirus	Ichnovirus	IVSPERs	Nudiviridae	Viruses	NA	NA	NA	NA	NA	NA	NA	NA	NA	NA	NA	NA
275	IVSPERs	Cluster3513	24	scaffold_1614:20468-21095(-):Campopleginae	Campopleginae	scaffold_1614_20468-21095_-__Campopleginae	scaffold_1614:Campopleginae	1	NA	NA	NA	NA	NA	BAF45626.1_CP_Pichon-venturia	NA	87226	scaffold_1614:Campopleginae	1	4	35.9	220	133	0	1	209	15	234	9.237e-34	133	237	74492	unclassified_Ichnovirus	Tranosema_rostrale_ichnovirus	Ichnovirus	IVSPERs	Nudiviridae	Viruses	NA	NA	NA	NA	NA	NA	NA	NA	NA	NA	NA	NA
275	IVSPERs	Cluster3513	3	scaffold_1099_0:61568-61997(-):Campopleginae	Campopleginae	scaffold_1099_0_61568-61997_-__Campopleginae	scaffold_1099_0:Campopleginae	NA	NA	NA	NA	NA	NA	BAF45626.1_CP_Pichon-venturia	NA	43501	scaffold_1099_0:Campopleginae	NA	1	64.4	143	50	0	3	143	13	155	1.008e-52	184	237	74492	unclassified_Ichnovirus	Tranosema_rostrale_ichnovirus	Ichnovirus	IVSPERs	Nudiviridae	Viruses	NA	NA	NA	NA	NA	NA	NA	NA	NA	NA	NA	NA
275	IVSPERs	Cluster3513	4	scaffold_7_3-HSPs_-__Campopleginae	Campopleginae	scaffold_7_3-HSPs_-__Campopleginae	scaffold_7:Campopleginae	NA	NA	NA	NA	NA	NA	BAF45626.1_CP_Pichon-venturia	NA	87324	scaffold_7:Campopleginae	NA	26	46.2	119	62	0	1	116	106	224	7.492e-25	102	237	74492	unclassified_Ichnovirus	Tranosema_rostrale_ichnovirus	Ichnovirus	IVSPERs	Nudiviridae	Viruses	NA	NA	NA	NA	NA	NA	NA	NA	NA	NA	NA	NA
275	IVSPERs	Cluster3513	5	scaffold_924:21014-21575(+):Campopleginae	Campopleginae	scaffold_924_21014-21575_+__Campopleginae	scaffold_924:Campopleginae	NA	NA	NA	NA	NA	NA	BAF45626.1_CP_Pichon-venturia	NA	46602	scaffold_924:Campopleginae	NA	13	46.1	173	93	0	1	173	26	198	4.932e-39	147	237	74492	unclassified_Ichnovirus	Tranosema_rostrale_ichnovirus	Ichnovirus	IVSPERs	Nudiviridae	Viruses	NA	NA	NA	NA	NA	NA	NA	NA	NA	NA	NA	NA
275	IVSPERs	Cluster3513	6	scaffold_1099_0:62554-63166(-):Campopleginae	Campopleginae	scaffold_1099_0_62554-63166_-__Campopleginae	scaffold_1099_0:Campopleginae	NA	NA	NA	NA	NA	NA	BAF45626.1_CP_Pichon-venturia	NA	43504	scaffold_1099_0:Campopleginae	NA	1	54.5	203	92	0	1	203	19	221	2.833e-61	212	237	74492	unclassified_Ichnovirus	Tranosema_rostrale_ichnovirus	Ichnovirus	IVSPERs	Nudiviridae	Viruses	NA	NA	NA	NA	NA	NA	NA	NA	NA	NA	NA	NA
275	IVSPERs	Cluster3513	7	scaffold_783:42702-43247(-):Campopleginae	Campopleginae	scaffold_783_42702-43247_-__Campopleginae	scaffold_783:Campopleginae	NA	NA	NA	NA	NA	NA	BAF45626.1_CP_Pichon-venturia	NA	87315	scaffold_783:Campopleginae	NA	12	60.5	93	35	0	1	93	41	129	3.9e-27	112	237	74492	unclassified_Ichnovirus	Tranosema_rostrale_ichnovirus	Ichnovirus	IVSPERs	Nudiviridae	Viruses	NA	NA	NA	NA	NA	NA	NA	NA	NA	NA	NA	NA
275	IVSPERs	Cluster3513	8	scaffold_924:19461-20130(+):Campopleginae	Campopleginae	scaffold_924_19461-20130_+__Campopleginae	scaffold_924:Campopleginae	NA	NA	NA	NA	NA	NA	BAF45627.1_CP_Pichon-venturia	NA	46603	scaffold_924:Campopleginae	NA	13	47.7	223	116	0	1	223	3	224	1.337e-55	197	233	74492	unclassified_Ichnovirus	Tranosema_rostrale_ichnovirus	Ichnovirus	IVSPERs	Nudiviridae	Viruses	NA	NA	NA	NA	NA	NA	NA	NA	NA	NA	NA	NA
275	IVSPERs	Cluster3513	9	scaffold_924:17233-17875(+):Campopleginae	Campopleginae	scaffold_924_17233-17875_+__Campopleginae	scaffold_924:Campopleginae	NA	NA	NA	NA	NA	NA	BAF45626.1_CP_Pichon-venturia	NA	46597	scaffold_924:Campopleginae	NA	13	52.7	190	89	0	17	206	21	210	1.033e-53	191	237	74492	unclassified_Ichnovirus	Tranosema_rostrale_ichnovirus	Ichnovirus	IVSPERs	Nudiviridae	Viruses	NA	NA	NA	NA	NA	NA	NA	NA	NA	NA	NA	NA
275	IVSPERs	Cluster5349	1	scaffold_869:36016-36538(-):Campopleginae	Campopleginae	scaffold_869_36016-36538_-__Campopleginae	scaffold_869:Campopleginae	NA	NA	NA	NA	NA	NA	ADI40458.1_CP_Volkoff-hyposoter	NA	87345	scaffold_869:Campopleginae	NA	20	78.9	174	37	0	1	174	1	174	1.671e-86	283	176	260305	cellular_organisms	Hyposoter_didymator	Hyposoter	IVSPERs	IVSPERs	Eukaryota	Campopleginae	Ichneumonoidea	Parasitoida	Apocrita	Hymenoptera	Holometabola	Neoptera	Pterygota	Insecta	Hexapoda	Arthropoda	Metazoa
275	IVSPERs	Cluster5910	1	scaffold_998:8447-9758(+):Campopleginae	Campopleginae	scaffold_998_8447-9758_+__Campopleginae	scaffold_998:Campopleginae	NA	NA	NA	NA	NA	NA	ADI40475.1_CP_Volkoff-hyposoter	NA	87353	scaffold_998:Campopleginae	NA	12	72.1	446	122	0	1	437	1	446	5.252e-208	649	446	260305	cellular_organisms	Hyposoter_didymator	Hyposoter	IVSPERs	IVSPERs	Eukaryota	Campopleginae	Ichneumonoidea	Parasitoida	Apocrita	Hymenoptera	Holometabola	Neoptera	Pterygota	Insecta	Hexapoda	Arthropoda	Metazoa
275	IVSPERs	Cluster5910	2	scaffold_36_0:26576-27857(-):Campopleginae	Campopleginae	scaffold_36_0_26576-27857_-__Campopleginae	scaffold_36_0:Campopleginae	NA	NA	NA	NA	NA	NA	ADI40484.1_CP_Volkoff-hyposoter	NA	87293	scaffold_36_0:Campopleginae	NA	21	73	431	115	0	1	427	1	431	7.946e-204	636	431	260305	cellular_organisms	Hyposoter_didymator	Hyposoter	IVSPERs	IVSPERs	Eukaryota	Campopleginae	Ichneumonoidea	Parasitoida	Apocrita	Hymenoptera	Holometabola	Neoptera	Pterygota	Insecta	Hexapoda	Arthropoda	Metazoa
141	Lispiviridae	Cluster10827	1	SGBU01000028.1:311813-312299(+):Nylanderia_fulva	Nylanderia_fulva	SGBU01000028.1_311813-312299_+__Nylanderia_fulva	SGBU01000028.1:Nylanderia_fulva	104	NA	NA	225	1841.46	1841.46	YP_009336887	Lispiviridae	38660	SGBU01000028.1:Nylanderia_fulva	104	171	31.3	165	111	0	1	162	67	231	4.266e-17	82	533	1923187	Riboviria	Hubei_rhabdo-like_virus_3	NA	Lispiviridae	Lispiviridae	Viruses	NA	NA	NA	NA	NA	NA	NA	NA	NA	NA	NA	NA
141	Lispiviridae	Cluster10827	3	NA	NA	NA	NA	NA	NA	NA	NA	NA	NA	NA	NA	NA	NA	NA	NA	NA	NA	NA	NA	NA	NA	NA	NA	NA	NA	NA	NA	NA	NA	NA	NA	NA	NA	NA	NA	NA	NA	NA	NA	NA	NA	NA	NA	NA	NA
357	Lispiviridae	Cluster10827	2	NJRL01000060.1:336011-336683(+):Aphaenogaster_rudis	Aphaenogaster_rudis	NJRL01000060.1_336011-336683_+__Aphaenogaster_rudis	NJRL01000060.1:Aphaenogaster_rudis	28	NA	NA	NA	NA	NA	YP_009336887	Lispiviridae	13073	NJRL01000060.1:Aphaenogaster_rudis	28	50	32.3	229	151	0	1	224	30	258	1.625e-28	118	533	1923187	Riboviria	Hubei_rhabdo-like_virus_3	NA	Lispiviridae	Lispiviridae	Viruses	NA	NA	NA	NA	NA	NA	NA	NA	NA	NA	NA	NA
357	Lispiviridae	Cluster10827	2	NJRL01000603.1:60597-61788(+):Aphaenogaster_rudis	Aphaenogaster_rudis	NJRL01000603.1_60597-61788_+__Aphaenogaster_rudis	NJRL01000603.1:Aphaenogaster_rudis	24	NA	NA	NA	NA	NA	YP_009336887	Lispiviridae	13161	NJRL01000603.1:Aphaenogaster_rudis	24	10	24.2	379	283	0	23	397	145	523	2.666e-27	120	533	1923187	Riboviria	Hubei_rhabdo-like_virus_3	NA	Lispiviridae	Lispiviridae	Viruses	NA	NA	NA	NA	NA	NA	NA	NA	NA	NA	NA	NA
357	Lispiviridae	Cluster10827	2	NJRM01000473.1:167084-167756(-):Aphaenogaster_picea	Aphaenogaster_picea	NJRM01000473.1_167084-167756_-__Aphaenogaster_picea	NJRM01000473.1:Aphaenogaster_picea	12	NA	NA	NA	NA	NA	YP_009336887	Lispiviridae	13503	NJRM01000473.1:Aphaenogaster_picea	12	12	32.8	229	150	0	1	224	30	258	1.837e-29	121	533	1923187	Riboviria	Hubei_rhabdo-like_virus_3	NA	Lispiviridae	Lispiviridae	Viruses	NA	NA	NA	NA	NA	NA	NA	NA	NA	NA	NA	NA
357	Lispiviridae	Cluster10827	2	NJRM01001244.1:22893-24084(+):Aphaenogaster_picea	Aphaenogaster_picea	NJRM01001244.1_22893-24084_+__Aphaenogaster_picea	NJRM01001244.1:Aphaenogaster_picea	24	NA	NA	NA	NA	NA	YP_009336887	Lispiviridae	13527	NJRM01001244.1:Aphaenogaster_picea	24	9	24.6	379	282	0	23	397	145	523	1.348e-28	124	533	1923187	Riboviria	Hubei_rhabdo-like_virus_3	NA	Lispiviridae	Lispiviridae	Viruses	NA	NA	NA	NA	NA	NA	NA	NA	NA	NA	NA	NA
357	Lispiviridae	Cluster10827	2	NJRN01000088.1:458991-459663(+):Aphaenogaster_miamiana	Aphaenogaster_miamiana	NJRN01000088.1_458991-459663_+__Aphaenogaster_miamiana	NJRN01000088.1:Aphaenogaster_miamiana	29	NA	NA	NA	NA	NA	YP_009336887	Lispiviridae	13846	NJRN01000088.1:Aphaenogaster_miamiana	29	40	32.8	229	150	0	1	224	30	258	1.837e-29	121	533	1923187	Riboviria	Hubei_rhabdo-like_virus_3	NA	Lispiviridae	Lispiviridae	Viruses	NA	NA	NA	NA	NA	NA	NA	NA	NA	NA	NA	NA
357	Lispiviridae	Cluster10827	2	NJRN01001067.1:21464-22655(+):Aphaenogaster_miamiana	Aphaenogaster_miamiana	NJRN01001067.1_21464-22655_+__Aphaenogaster_miamiana	NJRN01001067.1:Aphaenogaster_miamiana	21	NA	NA	NA	NA	NA	YP_009336887	Lispiviridae	14047	NJRN01001067.1:Aphaenogaster_miamiana	21	8	24.6	379	282	0	23	397	145	523	1.348e-28	124	533	1923187	Riboviria	Hubei_rhabdo-like_virus_3	NA	Lispiviridae	Lispiviridae	Viruses	NA	NA	NA	NA	NA	NA	NA	NA	NA	NA	NA	NA
357	Lispiviridae	Cluster10827	2	NJRO01000517.1:30662-31334(+):Aphaenogaster_fulva	Aphaenogaster_fulva	NJRO01000517.1_30662-31334_+__Aphaenogaster_fulva	NJRO01000517.1:Aphaenogaster_fulva	4	NA	NA	NA	NA	NA	YP_009336887	Lispiviridae	14156	NJRO01000517.1:Aphaenogaster_fulva	4	5	32.7	229	150	0	1	224	30	258	2.508e-29	121	533	1923187	Riboviria	Hubei_rhabdo-like_virus_3	NA	Lispiviridae	Lispiviridae	Viruses	NA	NA	NA	NA	NA	NA	NA	NA	NA	NA	NA	NA
357	Lispiviridae	Cluster10827	2	NJRO01000991.1:45443-46634(+):Aphaenogaster_fulva	Aphaenogaster_fulva	NJRO01000991.1_45443-46634_+__Aphaenogaster_fulva	NJRO01000991.1:Aphaenogaster_fulva	26	NA	NA	NA	NA	NA	YP_009336887	Lispiviridae	14158	NJRO01000991.1:Aphaenogaster_fulva	26	9	24.5	379	282	0	23	397	145	523	3.303e-28	123	533	1923187	Riboviria	Hubei_rhabdo-like_virus_3	NA	Lispiviridae	Lispiviridae	Viruses	NA	NA	NA	NA	NA	NA	NA	NA	NA	NA	NA	NA
357	Lispiviridae	Cluster10827	2	NJRP01000333.1:75475-76210(+):Aphaenogaster_floridana	Aphaenogaster_floridana	NJRP01000333.1_75475-76210_+__Aphaenogaster_floridana	NJRP01000333.1:Aphaenogaster_floridana	16	NA	NA	NA	NA	NA	YP_009336887	Lispiviridae	14484	NJRP01000333.1:Aphaenogaster_floridana	16	10	25.6	247	182	0	1	245	192	438	6.334e-18	88	533	1923187	Riboviria	Hubei_rhabdo-like_virus_3	NA	Lispiviridae	Lispiviridae	Viruses	NA	NA	NA	NA	NA	NA	NA	NA	NA	NA	NA	NA
13	Unclassified	Cluster10827	4	NA	NA	NA	NA	NA	NA	NA	NA	NA	NA	NA	NA	NA	NA	NA	NA	NA	NA	NA	NA	NA	NA	NA	NA	NA	NA	NA	NA	NA	NA	NA	NA	NA	NA	NA	NA	NA	NA	NA	NA	NA	NA	NA	NA	NA	NA
254	Nudiviridae	Cluster10833	2	scaffold_159:201057-203709(-):Venturia_canescens	Venturia_canescens	scaffold_159_201057-203709_-__Venturia_canescens	scaffold_159:Venturia_canescens	NA	NA	NA	110	16975.8	16975.8	AKH40378.1_CP_Burke-fopius	NA	44598	scaffold_159:Venturia_canescens	NA	35	58.2	880	362	0	4	883	3	868	3.23500000272156e-316	986	908	1654582	unclassified_Nudiviridae	Kallithea_virus	NA	Nudiviridae	Nudiviridae	Viruses	NA	NA	NA	NA	NA	NA	NA	NA	NA	NA	NA	NA
254	Nudiviridae	Cluster11092	1	scaffold_633:95438-95759(-):Venturia_canescens	Venturia_canescens	scaffold_633_95438-95759_-__Venturia_canescens	scaffold_633:Venturia_canescens	NA	NA	NA	2	2543.01	2543.01	AJZ73126.1_CP_Burke-fopius	NA	47133	scaffold_633:Venturia_canescens	NA	4	97.8	107	2	0	1	107	1	107	6.551e-67	223	107	32260	cellular_organisms	Venturia_canescens	Venturia	Nudiviridae	Nudiviridae	Eukaryota	Campopleginae	Ichneumonoidea	Parasitoida	Apocrita	Hymenoptera	Holometabola	Neoptera	Pterygota	Insecta	Hexapoda	Arthropoda	Metazoa
254	Nudiviridae	Cluster11238	1	scaffold_483:103646-104210(-):Venturia_canescens	Venturia_canescens	scaffold_483_103646-104210_-__Venturia_canescens	scaffold_483:Venturia_canescens	3	NA	NA	0	0	0	AJZ73116.1_CP_Burke-fopius	NA	45875	scaffold_483:Venturia_canescens	3	7	97.1	188	5	0	1	188	1	188	4.079e-122	387	188	32260	cellular_organisms	Venturia_canescens	Venturia	Nudiviridae	Nudiviridae	Eukaryota	Campopleginae	Ichneumonoidea	Parasitoida	Apocrita	Hymenoptera	Holometabola	Neoptera	Pterygota	Insecta	Hexapoda	Arthropoda	Metazoa
254	Nudiviridae	Cluster11825	2	scaffold_969:31430-31583(-):Venturia_canescens	Venturia_canescens	scaffold_969_31430-31583_-__Venturia_canescens	scaffold_969:Venturia_canescens	NA	NA	NA	0	0	0	YP_009346001	NA	46975	scaffold_969:Venturia_canescens	NA	15	58	50	21	0	1	50	1	50	5.172e-11	59	53	1654582	unclassified_Nudiviridae	Kallithea_virus	NA	Nudiviridae	Nudiviridae	Viruses	NA	NA	NA	NA	NA	NA	NA	NA	NA	NA	NA	NA
254	Nudiviridae	Cluster12087	1	scaffold_969:21014-21248(+):Venturia_canescens	Venturia_canescens	scaffold_969_21014-21248_+__Venturia_canescens	scaffold_969:Venturia_canescens	NA	NA	NA	1	1742.24	1742.24	YP_009553416	NA	46887	scaffold_969:Venturia_canescens	NA	15	56.5	77	33	0	1	77	1	77	5.783e-20	86	78	2053981	unclassified_Nudiviridae	Tomelloso_virus	NA	Nudiviridae	Nudiviridae	Viruses	NA	NA	NA	NA	NA	NA	NA	NA	NA	NA	NA	NA
254	Nudiviridae	Cluster13641	1	scaffold_483:98941-99367(+):Venturia_canescens	Venturia_canescens	scaffold_483_98941-99367_+__Venturia_canescens	scaffold_483:Venturia_canescens	3	NA	NA	0	0	0	YP_009553133	NA	45932	scaffold_483:Venturia_canescens	3	7	36.8	126	78	0	5	130	10	133	1.002e-16	80	135	2057187	unclassified_Nudiviridae	Drosophila_innubila_nudivirus	NA	Nudiviridae	Nudiviridae	Viruses	NA	NA	NA	NA	NA	NA	NA	NA	NA	NA	NA	NA
254	Nudiviridae	Cluster14604	2	scaffold_483:97453-98131(-):Venturia_canescens	Venturia_canescens	scaffold_483_97453-98131_-__Venturia_canescens	scaffold_483:Venturia_canescens	3	NA	NA	0	0	0	ABO45407	NA	45879	scaffold_483:Venturia_canescens	3	7	35.5	188	118	0	19	202	7	194	1.842e-26	112	235	432587	NA	Gryllus_bimaculatus_nudivirus	Alphanudivirus	Nudiviridae	Nudiviridae	Viruses	NA	NA	NA	NA	NA	NA	NA	NA	NA	NA	NA	NA
254	Nudiviridae	Cluster15164	2	scaffold_969_3-HSPs_+__Venturia_canescens	Venturia_canescens	scaffold_969_3-HSPs_+__Venturia_canescens	scaffold_969:Venturia_canescens	NA	NA	NA	NA	NA	NA	AJZ73131.1_CP_Burke-fopius	NA	46771	scaffold_969:Venturia_canescens	NA	15	92	351	27	0	1	351	137	477	1.481e-219	677	631	32260	cellular_organisms	Venturia_canescens	Venturia	Nudiviridae	Nudiviridae	Eukaryota	Campopleginae	Ichneumonoidea	Parasitoida	Apocrita	Hymenoptera	Holometabola	Neoptera	Pterygota	Insecta	Hexapoda	Arthropoda	Metazoa
254	Nudiviridae	Cluster16413	2	scaffold_969:25866-27516(-):Venturia_canescens	Venturia_canescens	scaffold_969_25866-27516_-__Venturia_canescens	scaffold_969:Venturia_canescens	NA	NA	NA	0	0	0	YP_002321336.1_CP_Pichon-venturia	NA	46968	scaffold_969:Venturia_canescens	NA	15	44.1	549	306	0	1	549	2	549	5.132e-131	432	552	92521	NA	Oryctes_rhinoceros_nudivirus	Alphanudivirus	Nudiviridae	Nudiviridae	Viruses	NA	NA	NA	NA	NA	NA	NA	NA	NA	NA	NA	NA
254	Nudiviridae	Cluster17433	2	scaffold_969:11276-12347(-):Venturia_canescens	Venturia_canescens	scaffold_969_11276-12347_-__Venturia_canescens	scaffold_969:Venturia_canescens	NA	NA	NA	0	0	0	YP_009553149	NA	46905	scaffold_969:Venturia_canescens	NA	15	30.4	324	219	0	6	320	3	326	4.549e-38	151	401	2057187	unclassified_Nudiviridae	Drosophila_innubila_nudivirus	NA	Nudiviridae	Nudiviridae	Viruses	NA	NA	NA	NA	NA	NA	NA	NA	NA	NA	NA	NA
254	Nudiviridae	Cluster17433	2	scaffold_969:38361-39378(-):Venturia_canescens	Venturia_canescens	scaffold_969_38361-39378_-__Venturia_canescens	scaffold_969:Venturia_canescens	NA	NA	NA	2	804.372	804.372	YP_009553149	NA	46937	scaffold_969:Venturia_canescens	NA	15	28.1	330	237	0	1	330	3	332	4.338e-33	136	401	2057187	unclassified_Nudiviridae	Drosophila_innubila_nudivirus	NA	Nudiviridae	Nudiviridae	Viruses	NA	NA	NA	NA	NA	NA	NA	NA	NA	NA	NA	NA
254	Nudiviridae	Cluster17433	2	scaffold_969:41729-42716(-):Venturia_canescens	Venturia_canescens	scaffold_969_41729-42716_-__Venturia_canescens	scaffold_969:Venturia_canescens	NA	NA	NA	0	0	0	YP_009553149	NA	46927	scaffold_969:Venturia_canescens	NA	15	25.5	322	235	0	6	321	3	324	1.57e-25	113	401	2057187	unclassified_Nudiviridae	Drosophila_innubila_nudivirus	NA	Nudiviridae	Nudiviridae	Viruses	NA	NA	NA	NA	NA	NA	NA	NA	NA	NA	NA	NA
254	Nudiviridae	Cluster17433	2	scaffold_969:7529-8546(-):Venturia_canescens	Venturia_canescens	scaffold_969_7529-8546_-__Venturia_canescens	scaffold_969:Venturia_canescens	NA	NA	NA	0	0	0	YP_009553149	NA	46917	scaffold_969:Venturia_canescens	NA	15	30.6	321	214	0	7	316	3	323	2.784e-38	151	401	2057187	unclassified_Nudiviridae	Drosophila_innubila_nudivirus	NA	Nudiviridae	Nudiviridae	Viruses	NA	NA	NA	NA	NA	NA	NA	NA	NA	NA	NA	NA
254	Nudiviridae	Cluster17609	1	scaffold_159:195437-199085(+):Venturia_canescens	Venturia_canescens	scaffold_159_195437-199085_+__Venturia_canescens	scaffold_159:Venturia_canescens	NA	NA	NA	47	5273.5	5273.5	AJZ73107.1_CP_Burke-fopius	NA	44605	scaffold_159:Venturia_canescens	NA	35	96.2	1207	46	0	10	1216	1	1207	0	2443	1207	32260	cellular_organisms	Venturia_canescens	Venturia	Nudiviridae	Nudiviridae	Eukaryota	Campopleginae	Ichneumonoidea	Parasitoida	Apocrita	Hymenoptera	Holometabola	Neoptera	Pterygota	Insecta	Hexapoda	Arthropoda	Metazoa
254	Nudiviridae	Cluster17704	1	scaffold_633:94523-95138(-):Venturia_canescens	Venturia_canescens	scaffold_633_94523-95138_-__Venturia_canescens	scaffold_633:Venturia_canescens	NA	NA	NA	2	1329.3	1329.3	AJZ73125.1_CP_Burke-fopius	NA	47072	scaffold_633:Venturia_canescens	NA	4	98	197	4	0	9	205	1	197	1.037e-129	409	197	32260	cellular_organisms	Venturia_canescens	Venturia	Nudiviridae	Nudiviridae	Eukaryota	Campopleginae	Ichneumonoidea	Parasitoida	Apocrita	Hymenoptera	Holometabola	Neoptera	Pterygota	Insecta	Hexapoda	Arthropoda	Metazoa
254	Nudiviridae	Cluster18059	2	scaffold_969:1372-2197(-):Venturia_canescens	Venturia_canescens	scaffold_969_1372-2197_-__Venturia_canescens	scaffold_969:Venturia_canescens	NA	NA	NA	4	1982.69	1982.69	YP_002321429.1_CP_Pichon-venturia	NA	46748	scaffold_969:Venturia_canescens	NA	15	47.6	265	134	0	11	275	7	262	5.786e-67	232	263	92521	NA	Oryctes_rhinoceros_nudivirus	Alphanudivirus	Nudiviridae	Nudiviridae	Viruses	NA	NA	NA	NA	NA	NA	NA	NA	NA	NA	NA	NA
254	Nudiviridae	Cluster18176	1	scaffold_483:115191-116331(+):Venturia_canescens	Venturia_canescens	scaffold_483_115191-116331_+__Venturia_canescens	scaffold_483:Venturia_canescens	3	NA	NA	3	1076.49	1076.49	YP_009551738	NA	45924	scaffold_483:Venturia_canescens	3	7	33.1	352	213	0	45	364	56	407	1.131e-49	186	426	2072209	unclassified_Nudiviridae	Esparto_virus	NA	Nudiviridae	Nudiviridae	Viruses	NA	NA	NA	NA	NA	NA	NA	NA	NA	NA	NA	NA
254	Nudiviridae	Cluster18349	3	scaffold_1328:3899-4712(+):Venturia_canescens	Venturia_canescens	scaffold_1328_3899-4712_+__Venturia_canescens	scaffold_1328:Venturia_canescens	NA	NA	NA	6	3017.88	3017.88	ABO45352	NA	47034	scaffold_1328:Venturia_canescens	NA	3	46.8	275	142	0	1	268	3	277	2.139e-68	236	285	432587	NA	Gryllus_bimaculatus_nudivirus	Alphanudivirus	Nudiviridae	Nudiviridae	Viruses	NA	NA	NA	NA	NA	NA	NA	NA	NA	NA	NA	NA
254	Nudiviridae	Cluster18349	3	scaffold_1328:767-1586(+):Venturia_canescens	Venturia_canescens	scaffold_1328_767-1586_+__Venturia_canescens	scaffold_1328:Venturia_canescens	NA	NA	NA	3	1497.9	1497.9	ABO45352	NA	47043	scaffold_1328:Venturia_canescens	NA	3	44.2	275	150	0	1	270	3	277	1.671e-62	219	285	432587	NA	Gryllus_bimaculatus_nudivirus	Alphanudivirus	Nudiviridae	Nudiviridae	Viruses	NA	NA	NA	NA	NA	NA	NA	NA	NA	NA	NA	NA
254	Nudiviridae	Cluster18349	3	scaffold_159:207811-208645(-):Venturia_canescens	Venturia_canescens	scaffold_159_207811-208645_-__Venturia_canescens	scaffold_159:Venturia_canescens	NA	NA	NA	19	9316.26	9316.26	YP_001111286.1_CP_Pichon-venturia	NA	44584	scaffold_159:Venturia_canescens	NA	35	41.9	269	152	0	15	277	11	279	9.38e-56	200	285	432587	NA	Gryllus_bimaculatus_nudivirus	Alphanudivirus	Nudiviridae	Nudiviridae	Viruses	NA	NA	NA	NA	NA	NA	NA	NA	NA	NA	NA	NA
254	Nudiviridae	Cluster19564	2	scaffold_969:31967-32375(+):Venturia_canescens	Venturia_canescens	scaffold_969_31967-32375_+__Venturia_canescens	scaffold_969:Venturia_canescens	NA	NA	NA	0	0	0	AJZ73143.1_CP_Burke-fopius	NA	46865	scaffold_969:Venturia_canescens	NA	15	96.5	136	5	0	1	136	1	136	1.216e-85	278	136	32260	cellular_organisms	Venturia_canescens	Venturia	Nudiviridae	Nudiviridae	Eukaryota	Campopleginae	Ichneumonoidea	Parasitoida	Apocrita	Hymenoptera	Holometabola	Neoptera	Pterygota	Insecta	Hexapoda	Arthropoda	Metazoa
254	Nudiviridae	Cluster1971	2	scaffold_969:17891-18827(-):Venturia_canescens	Venturia_canescens	scaffold_969_17891-18827_-__Venturia_canescens	scaffold_969:Venturia_canescens	NA	NA	NA	0	0	0	XP_011300598.1_CP_Burke-fopius	NA	46782	scaffold_969:Venturia_canescens	NA	15	37.5	287	163	0	45	306	61	347	2.127e-49	183	408	64838	cellular_organisms	Fopius_arisanus	Fopius	Nudiviridae	Nudiviridae	Eukaryota	Opiinae	Ichneumonoidea	Parasitoida	Apocrita	Hymenoptera	Holometabola	Neoptera	Pterygota	Insecta	Hexapoda	Arthropoda	Metazoa
254	Nudiviridae	Cluster20212	1	scaffold_969:58990-59287(+):Venturia_canescens	Venturia_canescens	scaffold_969_58990-59287_+__Venturia_canescens	scaffold_969:Venturia_canescens	NA	NA	NA	16	21982.6	21982.6	AJZ73152.1_CP_Burke-fopius	NA	46980	scaffold_969:Venturia_canescens	NA	15	98.6	99	1	0	1	99	1	99	5.305e-62	208	99	32260	cellular_organisms	Venturia_canescens	Venturia	Nudiviridae	Nudiviridae	Eukaryota	Campopleginae	Ichneumonoidea	Parasitoida	Apocrita	Hymenoptera	Holometabola	Neoptera	Pterygota	Insecta	Hexapoda	Arthropoda	Metazoa
254	Nudiviridae	Cluster20217	1	scaffold_969:28216-30160(-):Venturia_canescens	Venturia_canescens	scaffold_969_28216-30160_-__Venturia_canescens	scaffold_969:Venturia_canescens	NA	NA	NA	2	421.003	421.003	YP_002321437	NA	46744	scaffold_969:Venturia_canescens	NA	15	36.1	720	401	0	17	644	2	721	2.077e-128	428	737	92521	NA	Oryctes_rhinoceros_nudivirus	Alphanudivirus	Nudiviridae	Nudiviridae	Viruses	NA	NA	NA	NA	NA	NA	NA	NA	NA	NA	NA	NA
254	Nudiviridae	Cluster21204	1	scaffold_969:21277-21796(-):Venturia_canescens	Venturia_canescens	scaffold_969_21277-21796_-__Venturia_canescens	scaffold_969:Venturia_canescens	NA	NA	NA	0	0	0	AJZ73137.1_CP_Burke-fopius	NA	46942	scaffold_969:Venturia_canescens	NA	15	96.9	173	5	0	1	173	1	173	1.827e-111	355	173	32260	cellular_organisms	Venturia_canescens	Venturia	Nudiviridae	Nudiviridae	Eukaryota	Campopleginae	Ichneumonoidea	Parasitoida	Apocrita	Hymenoptera	Holometabola	Neoptera	Pterygota	Insecta	Hexapoda	Arthropoda	Metazoa
254	Nudiviridae	Cluster21249	1	scaffold_483:100211-101660(+):Venturia_canescens	Venturia_canescens	scaffold_483_100211-101660_+__Venturia_canescens	scaffold_483:Venturia_canescens	3	NA	NA	0	0	0	YP_009345985	NA	45863	scaffold_483:Venturia_canescens	3	7	32.5	490	321	0	7	482	7	496	2.618e-70	251	626	1654582	unclassified_Nudiviridae	Kallithea_virus	NA	Nudiviridae	Nudiviridae	Viruses	NA	NA	NA	NA	NA	NA	NA	NA	NA	NA	NA	NA
254	Nudiviridae	Cluster21733	2	scaffold_159:211052-212258(+):Venturia_canescens	Venturia_canescens	scaffold_159_211052-212258_+__Venturia_canescens	scaffold_159:Venturia_canescens	NA	NA	NA	9	3052.88	3052.88	YP_009553392	NA	44530	scaffold_159:Venturia_canescens	3	35	56.3	360	154	0	26	385	11	364	7.791e-119	389	376	2053981	unclassified_Nudiviridae	Tomelloso_virus	NA	Nudiviridae	Nudiviridae	Viruses	NA	NA	NA	NA	NA	NA	NA	NA	NA	NA	NA	NA
254	Nudiviridae	Cluster2197	2	scaffold_633:96346-98041(+):Venturia_canescens	Venturia_canescens	scaffold_633_96346-98041_+__Venturia_canescens	scaffold_633:Venturia_canescens	NA	NA	NA	41	9897.66	9897.66	YP_002321431.1_CP_Pichon-venturia	NA	47127	scaffold_633:Venturia_canescens	NA	4	36.2	387	242	0	137	517	238	624	4.431e-63	233	681	92521	NA	Oryctes_rhinoceros_nudivirus	Alphanudivirus	Nudiviridae	Nudiviridae	Viruses	NA	NA	NA	NA	NA	NA	NA	NA	NA	NA	NA	NA
254	Nudiviridae	Cluster23368	2	scaffold_969:36187-36526(-):Venturia_canescens	Venturia_canescens	scaffold_969_36187-36526_-__Venturia_canescens	scaffold_969:Venturia_canescens	NA	NA	NA	20	24083.8	24083.8	YP_002321433.1_CP_Pichon-venturia	NA	46963	scaffold_969:Venturia_canescens	NA	15	30.1	113	67	0	1	113	58	154	2.604e-08	55	160	92521	NA	Oryctes_rhinoceros_nudivirus	Alphanudivirus	Nudiviridae	Nudiviridae	Viruses	NA	NA	NA	NA	NA	NA	NA	NA	NA	NA	NA	NA
254	Nudiviridae	Cluster23903	2	scaffold_159:191916-192321(-):Venturia_canescens	Venturia_canescens	scaffold_159_191916-192321_-__Venturia_canescens	scaffold_159:Venturia_canescens	NA	NA	NA	12	12101.2	12101.2	YP_009553101	NA	44580	scaffold_159:Venturia_canescens	NA	35	34.9	113	72	0	2	114	265	376	2.455e-12	67	408	2057187	unclassified_Nudiviridae	Drosophila_innubila_nudivirus	NA	Nudiviridae	Nudiviridae	Viruses	NA	NA	NA	NA	NA	NA	NA	NA	NA	NA	NA	NA
254	Nudiviridae	Cluster26	2	scaffold_9:71059-71560(-):Venturia_canescens	Venturia_canescens	scaffold_9_71059-71560_-__Venturia_canescens	scaffold_9:Venturia_canescens	3	NA	NA	2	1631.18	1631.18	AHW98244.1_CP_Burke-fopius	NA	46988	scaffold_9:Venturia_canescens	3	12	56.5	151	65	0	17	167	21	171	5.871e-46	166	178	1487700	unclassified_Nudiviridae	Nilaparvata_lugens_endogenous_nudivirus	NA	Nudiviridae	Nudiviridae	Viruses	NA	NA	NA	NA	NA	NA	NA	NA	NA	NA	NA	NA
254	Nudiviridae	Cluster26	2	scaffold_9:72594-73065(-):Venturia_canescens	Venturia_canescens	scaffold_9_72594-73065_-__Venturia_canescens	scaffold_9:Venturia_canescens	3	NA	NA	15	13011.4	13011.4	AHW98244.1_CP_Burke-fopius	NA	47000	scaffold_9:Venturia_canescens	3	12	55.7	151	66	0	6	156	22	172	3.458e-45	163	178	1487700	unclassified_Nudiviridae	Nilaparvata_lugens_endogenous_nudivirus	NA	Nudiviridae	Nudiviridae	Viruses	NA	NA	NA	NA	NA	NA	NA	NA	NA	NA	NA	NA
254	Nudiviridae	Cluster26	2	scaffold_969:49941-50466(-):Venturia_canescens	Venturia_canescens	scaffold_969_49941-50466_-__Venturia_canescens	scaffold_969:Venturia_canescens	NA	NA	NA	2	1556.75	1556.75	YP_009345921	NA	46806	scaffold_969:Venturia_canescens	NA	15	42.8	174	98	0	1	172	62	235	9.776e-35	134	235	1654582	unclassified_Nudiviridae	Kallithea_virus	NA	Nudiviridae	Nudiviridae	Viruses	NA	NA	NA	NA	NA	NA	NA	NA	NA	NA	NA	NA
254	Nudiviridae	Cluster27243	2	scaffold_483:105269-105605(-):Venturia_canescens	Venturia_canescens	scaffold_483_105269-105605_-__Venturia_canescens	scaffold_483:Venturia_canescens	3	NA	NA	0	0	0	YP_009553081	NA	45862	scaffold_483:Venturia_canescens	3	7	27.3	110	78	0	3	112	2	109	2.539e-05	46	112	2057187	unclassified_Nudiviridae	Drosophila_innubila_nudivirus	NA	Nudiviridae	Nudiviridae	Viruses	NA	NA	NA	NA	NA	NA	NA	NA	NA	NA	NA	NA
254	Nudiviridae	Cluster27243	2	scaffold_969:24857-25112(+):Venturia_canescens	Venturia_canescens	scaffold_969_24857-25112_+__Venturia_canescens	scaffold_969:Venturia_canescens	NA	NA	NA	0	0	0	YP_009553408	NA	46790	scaffold_969:Venturia_canescens	NA	15	43.4	94	48	0	1	85	15	108	4.226e-16	76	112	2053981	unclassified_Nudiviridae	Tomelloso_virus	NA	Nudiviridae	Nudiviridae	Viruses	NA	NA	NA	NA	NA	NA	NA	NA	NA	NA	NA	NA
254	Nudiviridae	Cluster27243	2	scaffold_969:48544-48793(-):Venturia_canescens	Venturia_canescens	scaffold_969_48544-48793_-__Venturia_canescens	scaffold_969:Venturia_canescens	NA	NA	NA	4	6550.8	6550.8	YP_002321352.1_CP_Pichon-venturia	NA	46798	scaffold_969:Venturia_canescens	NA	15	34	91	53	0	2	83	17	107	2.814e-08	53	113	92521	NA	Oryctes_rhinoceros_nudivirus	Alphanudivirus	Nudiviridae	Nudiviridae	Viruses	NA	NA	NA	NA	NA	NA	NA	NA	NA	NA	NA	NA
254	Nudiviridae	Cluster312	3	scaffold_969:14560-16576(+):Venturia_canescens	Venturia_canescens	scaffold_969_14560-16576_+__Venturia_canescens	scaffold_969:Venturia_canescens	NA	NA	NA	60	12179.2	12179.2	YP_009551773	NA	46813	scaffold_969:Venturia_canescens	NA	15	31.2	630	418	0	4	633	1	609	6.109e-85	301	677	2072209	unclassified_Nudiviridae	Esparto_virus	NA	Nudiviridae	Nudiviridae	Viruses	NA	NA	NA	NA	NA	NA	NA	NA	NA	NA	NA	NA
254	Nudiviridae	Cluster3232	2	scaffold_633:92553-93663(-):Venturia_canescens	Venturia_canescens	scaffold_633_92553-93663_-__Venturia_canescens	scaffold_633:Venturia_canescens	NA	NA	NA	24	8844.47	8844.47	YP_009553166	NA	47141	scaffold_633:Venturia_canescens	NA	4	26.8	369	268	0	2	370	1	367	4.407e-34	140	581	2057187	unclassified_Nudiviridae	Drosophila_innubila_nudivirus	NA	Nudiviridae	Nudiviridae	Viruses	NA	NA	NA	NA	NA	NA	NA	NA	NA	NA	NA	NA
254	Nudiviridae	Cluster335	2	scaffold_969:9242-9497(+):Venturia_canescens	Venturia_canescens	scaffold_969_9242-9497_+__Venturia_canescens	scaffold_969:Venturia_canescens	NA	NA	NA	0	0	0	AJZ73133.1_CP_Burke-fopius	NA	46873	scaffold_969:Venturia_canescens	NA	15	90.6	85	8	0	1	85	1	85	1.209e-46	163	85	32260	cellular_organisms	Venturia_canescens	Venturia	Nudiviridae	Nudiviridae	Eukaryota	Campopleginae	Ichneumonoidea	Parasitoida	Apocrita	Hymenoptera	Holometabola	Neoptera	Pterygota	Insecta	Hexapoda	Arthropoda	Metazoa
254	Nudiviridae	Cluster3513	15	scaffold_2108:905-1430(-):Venturia_canescens	Venturia_canescens	scaffold_2108_905-1430_-__Venturia_canescens	scaffold_2108:Venturia_canescens	NA	NA	NA	4	3113.5	3113.5	BAF45626.1_CP_Pichon-venturia	NA	111157	scaffold_2108:Venturia_canescens	NA	0	48	151	77	0	25	175	25	174	2.779e-35	136	237	74492	unclassified_Ichnovirus	Tranosema_rostrale_ichnovirus	Ichnovirus	Nudiviridae	Nudiviridae	Viruses	NA	NA	NA	NA	NA	NA	NA	NA	NA	NA	NA	NA
254	Nudiviridae	Cluster3513	15	scaffold_223:92910-93429(+):Venturia_canescens	Venturia_canescens	scaffold_223_92910-93429_+__Venturia_canescens	scaffold_223:Venturia_canescens	NA	NA	NA	4	3149.43	3149.43	BAF45626.1_CP_Pichon-venturia	NA	45482	scaffold_223:Venturia_canescens	NA	5	55.6	173	75	0	1	170	14	186	1.089e-52	186	237	74492	unclassified_Ichnovirus	Tranosema_rostrale_ichnovirus	Ichnovirus	Nudiviridae	Nudiviridae	Viruses	NA	NA	NA	NA	NA	NA	NA	NA	NA	NA	NA	NA
254	Nudiviridae	Cluster3614	20	scaffold_159:204705-206205(-):Venturia_canescens	Venturia_canescens	scaffold_159_204705-206205_-__Venturia_canescens	scaffold_159:Venturia_canescens	NA	NA	NA	28	7637.51	7637.51	AHW98293.1_CP_Burke-fopius	NA	44475	scaffold_159:Venturia_canescens	NA	35	45.7	497	262	0	4	500	5	488	8.884e-125	411	493	1487700	unclassified_Nudiviridae	Nilaparvata_lugens_endogenous_nudivirus	NA	Nudiviridae	Nudiviridae	Viruses	NA	NA	NA	NA	NA	NA	NA	NA	NA	NA	NA	NA
254	Nudiviridae	Cluster3912	2	scaffold_969:45161-47225(+):Venturia_canescens	Venturia_canescens	scaffold_969_45161-47225_+__Venturia_canescens	scaffold_969:Venturia_canescens	NA	NA	NA	80	15861.5	15861.5	YP_009346008	NA	46876	scaffold_969:Venturia_canescens	NA	15	23.1	540	375	0	176	663	686	1225	6.154e-37	155	1380	1654582	unclassified_Nudiviridae	Kallithea_virus	NA	Nudiviridae	Nudiviridae	Viruses	NA	NA	NA	NA	NA	NA	NA	NA	NA	NA	NA	NA
254	Nudiviridae	Cluster4454	2	scaffold_969:278-1325(-):Venturia_canescens	Venturia_canescens	scaffold_969_278-1325_-__Venturia_canescens	scaffold_969:Venturia_canescens	NA	NA	NA	18	7032.11	7032.11	YP_009553145	NA	46890	scaffold_969:Venturia_canescens	NA	15	38.1	340	208	0	13	349	16	355	7.937e-62	221	361	2057187	unclassified_Nudiviridae	Drosophila_innubila_nudivirus	NA	Nudiviridae	Nudiviridae	Viruses	NA	NA	NA	NA	NA	NA	NA	NA	NA	NA	NA	NA
254	Nudiviridae	Cluster5096	1	scaffold_969:21826-22480(-):Venturia_canescens	Venturia_canescens	scaffold_969_21826-22480_-__Venturia_canescens	scaffold_969:Venturia_canescens	NA	NA	NA	0	0	0	ACH96163	NA	46952	scaffold_969:Venturia_canescens	NA	15	41.9	229	126	0	1	218	1	229	1.104e-46	171	255	92521	NA	Oryctes_rhinoceros_nudivirus	Alphanudivirus	Nudiviridae	Nudiviridae	Viruses	NA	NA	NA	NA	NA	NA	NA	NA	NA	NA	NA	NA
254	Nudiviridae	Cluster8206	1	scaffold_969:2851-3061(-):Venturia_canescens	Venturia_canescens	scaffold_969_2851-3061_-__Venturia_canescens	scaffold_969:Venturia_canescens	NA	NA	NA	6	11642.4	11642.4	ACH96209	NA	46983	scaffold_969:Venturia_canescens	NA	15	46.2	68	36	0	3	70	12	78	5.085e-11	60	83	92521	NA	Oryctes_rhinoceros_nudivirus	Alphanudivirus	Nudiviridae	Nudiviridae	Viruses	NA	NA	NA	NA	NA	NA	NA	NA	NA	NA	NA	NA
254	Nudiviridae	Cluster8496	2	scaffold_483:90911-91769(-):Venturia_canescens	Venturia_canescens	scaffold_483_90911-91769_-__Venturia_canescens	scaffold_483:Venturia_canescens	3	NA	NA	0	0	0	YP_009345943	NA	45913	scaffold_483:Venturia_canescens	3	7	42.4	240	135	0	15	250	159	398	3.005e-49	181	523	1654582	unclassified_Nudiviridae	Kallithea_virus	NA	Nudiviridae	Nudiviridae	Viruses	NA	NA	NA	NA	NA	NA	NA	NA	NA	NA	NA	NA
254	Nudiviridae	Cluster9535	3	scaffold_159:206433-207618(+):Venturia_canescens	Venturia_canescens	scaffold_159_206433-207618_+__Venturia_canescens	scaffold_159:Venturia_canescens	NA	NA	NA	24	8285.17	8285.17	YP_009551746	NA	44568	scaffold_159:Venturia_canescens	NA	35	45.7	382	204	0	14	390	31	412	8.836e-94	316	427	2072209	unclassified_Nudiviridae	Esparto_virus	NA	Nudiviridae	Nudiviridae	Viruses	NA	NA	NA	NA	NA	NA	NA	NA	NA	NA	NA	NA
44	Iridoviridae	Cluster11161	1	scaffold_28862:11524-11716(+):Ganaspis_ganaspis	Ganaspis_ganaspis	scaffold_28862_11524-11716_+__Ganaspis_ganaspis	scaffold_28862:Ganaspis_ganaspis	NA	NA	NA	NA	NA	NA	YP_009506747	NA	76287	scaffold_28862:Ganaspis_ganaspis	NA	1	65.6	59	20	0	1	59	1	59	6.466e-18	79	91	100220	NA	Bohle_iridovirus	Ranavirus	Iridoviridae	Iridoviridae	Viruses	Alphairidovirinae	NA	NA	NA	NA	NA	NA	NA	NA	NA	NA	NA
44	Iridoviridae	Cluster11270	1	scaffold_30811:10318-10526(+):Ganaspis_ganaspis	Ganaspis_ganaspis	scaffold_30811_10318-10526_+__Ganaspis_ganaspis	scaffold_30811:Ganaspis_ganaspis	NA	NA	NA	NA	NA	NA	YP_006347671	NA	76294	scaffold_30811:Ganaspis_ganaspis	NA	2	42.7	65	37	0	1	65	1	65	2.84e-08	52	86	84739	NA	European_catfish_virus	Ranavirus	Iridoviridae	Iridoviridae	Viruses	Alphairidovirinae	NA	NA	NA	NA	NA	NA	NA	NA	NA	NA	NA
44	Iridoviridae	Cluster4724	3	scaffold_12134:6655-6979(-):Ganaspis_ganaspis	Ganaspis_ganaspis	scaffold_12134_6655-6979_-__Ganaspis_ganaspis	scaffold_12134:Ganaspis_ganaspis	NA	NA	NA	NA	NA	NA	ALN36673	NA	75961	scaffold_12134:Ganaspis_ganaspis	NA	1	54.6	111	49	0	1	108	50	160	2.306e-30	118	242	265294	NA	Ambystoma_tigrinum_virus	Ranavirus	Iridoviridae	Iridoviridae	Viruses	Alphairidovirinae	NA	NA	NA	NA	NA	NA	NA	NA	NA	NA	NA
282	Phycodnaviridae	Cluster11161	3	UCOJ01002493.1:6602-6770(-):Cecidostiba_fungosa	Cecidostiba_fungosa	UCOJ01002493.1_6602-6770_-__Cecidostiba_fungosa	UCOJ01002493.1:Cecidostiba_fungosa	1	NA	NA	NA	NA	NA	YP_001498505	NA	41265	UCOJ01002493.1:Cecidostiba_fungosa	1	1	47.2	56	29	0	1	56	4	59	2.869e-08	51	104	380598	unclassified_Chlorovirus	Paramecium_bursaria_Chlorella_virus_AR158	Chlorovirus	Phycodnaviridae	Phycodnaviridae	Viruses	NA	NA	NA	NA	NA	NA	NA	NA	NA	NA	NA	NA
8	Reoviridae	Cluster11235	1	scaffold_12207:8653-10444(+):Eretmocerus_eremicus	Eretmocerus_eremicus	scaffold_12207_8653-10444_+__Eretmocerus_eremicus	scaffold_12207:Eretmocerus_eremicus	NA	NA	NA	NA	NA	NA	YP_009551617	NA	173219	scaffold_12207:Eretmocerus_eremicus	NA	0	19.6	629	479	0	1	597	66	694	8.25399999999999e-29	128	1331	2108203	Riboviria	Nephila_clavipes_virus_6	NA	Reoviridae	Reoviridae	Viruses	NA	NA	NA	NA	NA	NA	NA	NA	NA	NA	NA	NA
8	Reoviridae	Cluster3075	2	scaffold_19465_2-HSPs_+__Eretmocerus_eremicus	Eretmocerus_eremicus	scaffold_19465_2-HSPs_+__Eretmocerus_eremicus	scaffold_19465:Eretmocerus_eremicus	NA	NA	NA	NA	NA	NA	YP_392502	NA	111953	scaffold_19465:Eretmocerus_eremicus	NA	0	29.7	455	312	0	1	455	109	553	3.16e-54	203	1207	352248	Riboviria	Operophtera_brumata_reovirus	NA	Reoviridae	Reoviridae	Viruses	NA	NA	NA	NA	NA	NA	NA	NA	NA	NA	NA	NA
183	Nudiviridae	Cluster11238	3	NW_015149890.1:1756-2158(-):Polistes_dominula	Polistes_dominula	NW_015149890.1_1756-2158_-__Polistes_dominula	NW_015149890.1:Polistes_dominula	1	NA	NA	NA	NA	NA	ACH96174	NA	52917	NW_015149890.1:Polistes_dominula	1	1	30.4	134	86	0	1	134	5	129	1.556e-11	65	196	92521	NA	Oryctes_rhinoceros_nudivirus	Alphanudivirus	Nudiviridae	Nudiviridae	Viruses	NA	NA	NA	NA	NA	NA	NA	NA	NA	NA	NA	NA
75	LbFV_like	Cluster11296	1	scaffold_159:189163-189682(-):Leptopilina_boulardi	Leptopilina_boulardi	scaffold_159_189163-189682_-__Leptopilina_boulardi	scaffold_159:Leptopilina_boulardi	7	NA	NA	277	249.325	249.325	QKN22499.1	NA	44426	scaffold_159:Leptopilina_boulardi	7	60	24.2	173	123	0	1	173	51	213	2.474e-08	57	385	NA	NA	Drosophila-associated filamentous virus	NA	LbFV_like	LbFV_like	NA	NA	NA	NA	NA	NA	NA	NA	NA	NA	NA	NA	NA
75	LbFV_like	Cluster18060	1	IDBA_scaffold_10458:4809-4953(+):Leptopilina_boulardi	Leptopilina_boulardi	IDBA_scaffold_10458_4809-4953_+__Leptopilina_boulardi	IDBA_scaffold_10458:Leptopilina_boulardi	1	NA	NA	378	1220.15	1220.15	YP_009345649	NA	64744	IDBA_scaffold_10458:Leptopilina_boulardi	1	1	52.9	48	22	0	1	48	4	51	2.623e-08	51	51	552509	unclassified_viruses	Leptopilina_boulardi_filamentous_virus	NA	LbFV_like	LbFV_like	Viruses	NA	NA	NA	NA	NA	NA	NA	NA	NA	NA	NA	NA
75	LbFV_like	Cluster22220	1	IDBA_scaffold_18216:424-574(+):Leptopilina_boulardi	Leptopilina_boulardi	IDBA_scaffold_18216_424-574_+__Leptopilina_boulardi	IDBA_scaffold_18216:Leptopilina_boulardi	1	NA	NA	42	130.185	130.185	YP_009345648	NA	166353	IDBA_scaffold_18216:Leptopilina_boulardi	1	0	75.9	50	12	0	1	50	1	50	2.307e-18	80	62	552509	unclassified_viruses	Leptopilina_boulardi_filamentous_virus	NA	LbFV_like	LbFV_like	Viruses	NA	NA	NA	NA	NA	NA	NA	NA	NA	NA	NA	NA
75	LbFV_like	Cluster22220	10	IDBA_scaffold_17937:1236-1422(+):Leptopilina_boulardi	Leptopilina_boulardi	IDBA_scaffold_17937_1236-1422_+__Leptopilina_boulardi	IDBA_scaffold_17937:Leptopilina_boulardi	NA	NA	NA	67	167.696	167.696	YP_009345648	NA	166349	IDBA_scaffold_17937:Leptopilina_boulardi	NA	0	73.8	62	16	0	1	61	1	62	1.778e-23	95	62	552509	unclassified_viruses	Leptopilina_boulardi_filamentous_virus	NA	LbFV_like	LbFV_like	Viruses	NA	NA	NA	NA	NA	NA	NA	NA	NA	NA	NA	NA
75	LbFV_like	Cluster22220	10	IDBA_scaffold_23213:1688-1871(+):Leptopilina_boulardi	Leptopilina_boulardi	IDBA_scaffold_23213_1688-1871_+__Leptopilina_boulardi	IDBA_scaffold_23213:Leptopilina_boulardi	NA	NA	NA	18	45.7872	45.7872	YP_009345648	NA	166350	IDBA_scaffold_23213:Leptopilina_boulardi	NA	0	71.1	62	17	0	1	61	1	62	4.043e-22	91	62	552509	unclassified_viruses	Leptopilina_boulardi_filamentous_virus	NA	LbFV_like	LbFV_like	Viruses	NA	NA	NA	NA	NA	NA	NA	NA	NA	NA	NA	NA
75	LbFV_like	Cluster22220	11	IDBA_scaffold_10458:968-1151(+):Leptopilina_boulardi	Leptopilina_boulardi	IDBA_scaffold_10458_968-1151_+__Leptopilina_boulardi	IDBA_scaffold_10458:Leptopilina_boulardi	1	NA	NA	155	394.279	394.279	YP_009345648	NA	64743	IDBA_scaffold_10458:Leptopilina_boulardi	1	1	71.3	61	17	0	1	61	1	61	1.048e-21	90	62	552509	unclassified_viruses	Leptopilina_boulardi_filamentous_virus	NA	LbFV_like	LbFV_like	Viruses	NA	NA	NA	NA	NA	NA	NA	NA	NA	NA	NA	NA
75	LbFV_like	Cluster22220	15	IDBA_scaffold_9499:9640-9790(-):Leptopilina_boulardi	Leptopilina_boulardi	IDBA_scaffold_9499_9640-9790_-__Leptopilina_boulardi	IDBA_scaffold_9499:Leptopilina_boulardi	5	NA	NA	26	80.5909	80.5909	YP_009345648	NA	65820	IDBA_scaffold_9499:Leptopilina_boulardi	5	1	75.9	50	12	0	1	50	1	50	2.307e-18	80	62	552509	unclassified_viruses	Leptopilina_boulardi_filamentous_virus	NA	LbFV_like	LbFV_like	Viruses	NA	NA	NA	NA	NA	NA	NA	NA	NA	NA	NA	NA
75	LbFV_like	Cluster22220	2	IDBA_scaffold_17218:2864-3014(-):Leptopilina_boulardi	Leptopilina_boulardi	IDBA_scaffold_17218_2864-3014_-__Leptopilina_boulardi	IDBA_scaffold_17218:Leptopilina_boulardi	NA	NA	NA	44	136.385	136.385	YP_009345648	NA	166351	IDBA_scaffold_17218:Leptopilina_boulardi	NA	0	75.9	50	12	0	1	50	1	50	2.307e-18	80	62	552509	unclassified_viruses	Leptopilina_boulardi_filamentous_virus	NA	LbFV_like	LbFV_like	Viruses	NA	NA	NA	NA	NA	NA	NA	NA	NA	NA	NA	NA
75	LbFV_like	Cluster22220	3	IDBA_scaffold_25200:943-1093(-):Leptopilina_boulardi	Leptopilina_boulardi	IDBA_scaffold_25200_943-1093_-__Leptopilina_boulardi	IDBA_scaffold_25200:Leptopilina_boulardi	NA	NA	NA	1	3.09965	3.09965	YP_009345648	NA	166348	IDBA_scaffold_25200:Leptopilina_boulardi	NA	0	70.2	50	15	0	1	50	1	50	5.142e-16	73	62	552509	unclassified_viruses	Leptopilina_boulardi_filamentous_virus	NA	LbFV_like	LbFV_like	Viruses	NA	NA	NA	NA	NA	NA	NA	NA	NA	NA	NA	NA
75	LbFV_like	Cluster22220	4	IDBA_scaffold_16744_2:1081-1231(+):Leptopilina_boulardi	Leptopilina_boulardi	IDBA_scaffold_16744_2_1081-1231_+__Leptopilina_boulardi	IDBA_scaffold_16744_2:Leptopilina_boulardi	NA	NA	NA	13	40.2955	40.2955	YP_009345648	NA	166342	IDBA_scaffold_16744_2:Leptopilina_boulardi	NA	0	71.2	50	14	0	1	50	1	50	1.98e-16	74	62	552509	unclassified_viruses	Leptopilina_boulardi_filamentous_virus	NA	LbFV_like	LbFV_like	Viruses	NA	NA	NA	NA	NA	NA	NA	NA	NA	NA	NA	NA
75	LbFV_like	Cluster22220	5	IDBA_scaffold_19508:5025-5175(-):Leptopilina_boulardi	Leptopilina_boulardi	IDBA_scaffold_19508_5025-5175_-__Leptopilina_boulardi	IDBA_scaffold_19508:Leptopilina_boulardi	NA	NA	NA	0	0	0	YP_009345648	NA	166357	IDBA_scaffold_19508:Leptopilina_boulardi	NA	0	68.5	50	15	0	1	50	1	50	2.524e-15	71	62	552509	unclassified_viruses	Leptopilina_boulardi_filamentous_virus	NA	LbFV_like	LbFV_like	Viruses	NA	NA	NA	NA	NA	NA	NA	NA	NA	NA	NA	NA
75	LbFV_like	Cluster22220	6	IDBA_scaffold_28565:1605-1788(+):Leptopilina_boulardi	Leptopilina_boulardi	IDBA_scaffold_28565_1605-1788_+__Leptopilina_boulardi	IDBA_scaffold_28565:Leptopilina_boulardi	NA	NA	NA	102	259.461	259.461	YP_009345648	NA	166347	IDBA_scaffold_28565:Leptopilina_boulardi	NA	0	68.8	61	19	0	1	61	1	61	1.827e-20	87	62	552509	unclassified_viruses	Leptopilina_boulardi_filamentous_virus	NA	LbFV_like	LbFV_like	Viruses	NA	NA	NA	NA	NA	NA	NA	NA	NA	NA	NA	NA
75	LbFV_like	Cluster22220	7	IDBA_scaffold_48516:965-1124(-):Leptopilina_boulardi	Leptopilina_boulardi	IDBA_scaffold_48516_965-1124_-__Leptopilina_boulardi	IDBA_scaffold_48516:Leptopilina_boulardi	NA	NA	NA	75	219.397	219.397	YP_009345648	NA	166343	IDBA_scaffold_48516:Leptopilina_boulardi	NA	0	80.8	53	10	0	1	53	1	53	5.068e-22	91	62	552509	unclassified_viruses	Leptopilina_boulardi_filamentous_virus	NA	LbFV_like	LbFV_like	Viruses	NA	NA	NA	NA	NA	NA	NA	NA	NA	NA	NA	NA
75	LbFV_like	Cluster22220	8	IDBA_scaffold_22134:3916-4096(-):Leptopilina_boulardi	Leptopilina_boulardi	IDBA_scaffold_22134_3916-4096_-__Leptopilina_boulardi	IDBA_scaffold_22134:Leptopilina_boulardi	2	NA	NA	47	121.537	121.537	YP_009345648	NA	166341	IDBA_scaffold_22134:Leptopilina_boulardi	2	0	60.2	61	23	0	1	60	2	62	3.302e-16	74	62	552509	unclassified_viruses	Leptopilina_boulardi_filamentous_virus	NA	LbFV_like	LbFV_like	Viruses	NA	NA	NA	NA	NA	NA	NA	NA	NA	NA	NA	NA
75	LbFV_like	Cluster22220	8	IDBA_scaffold_28130:906-1056(-):Leptopilina_boulardi	Leptopilina_boulardi	IDBA_scaffold_28130_906-1056_-__Leptopilina_boulardi	IDBA_scaffold_28130:Leptopilina_boulardi	NA	NA	NA	26	80.5909	80.5909	YP_009345648	NA	166346	IDBA_scaffold_28130:Leptopilina_boulardi	NA	0	70.5	50	14	0	1	50	1	50	3.741e-16	74	62	552509	unclassified_viruses	Leptopilina_boulardi_filamentous_virus	NA	LbFV_like	LbFV_like	Viruses	NA	NA	NA	NA	NA	NA	NA	NA	NA	NA	NA	NA
75	LbFV_like	Cluster22220	9	IDBA_scaffold_16159:2568-2709(-):Leptopilina_boulardi	Leptopilina_boulardi	IDBA_scaffold_16159_2568-2709_-__Leptopilina_boulardi	IDBA_scaffold_16159:Leptopilina_boulardi	NA	NA	NA	30	98.8832	98.8832	YP_009345648	NA	166352	IDBA_scaffold_16159:Leptopilina_boulardi	NA	0	70	47	14	0	1	47	3	49	1.457e-14	69	62	552509	unclassified_viruses	Leptopilina_boulardi_filamentous_virus	NA	LbFV_like	LbFV_like	Viruses	NA	NA	NA	NA	NA	NA	NA	NA	NA	NA	NA	NA
75	LbFV_like	Cluster22220	9	IDBA_scaffold_19804:2319-2463(-):Leptopilina_boulardi	Leptopilina_boulardi	IDBA_scaffold_19804_2319-2463_-__Leptopilina_boulardi	IDBA_scaffold_19804:Leptopilina_boulardi	NA	NA	NA	51	164.623	164.623	YP_009345648	NA	166344	IDBA_scaffold_19804:Leptopilina_boulardi	NA	0	73.7	48	12	0	1	48	3	50	1.783e-16	74	62	552509	unclassified_viruses	Leptopilina_boulardi_filamentous_virus	NA	LbFV_like	LbFV_like	Viruses	NA	NA	NA	NA	NA	NA	NA	NA	NA	NA	NA	NA
75	LbFV_like	Cluster22220	9	IDBA_scaffold_29994:869-1013(-):Leptopilina_boulardi	Leptopilina_boulardi	IDBA_scaffold_29994_869-1013_-__Leptopilina_boulardi	IDBA_scaffold_29994:Leptopilina_boulardi	NA	NA	NA	104	335.703	335.703	YP_009345648	NA	166356	IDBA_scaffold_29994:Leptopilina_boulardi	NA	0	68.4	48	15	0	1	48	3	50	2.111e-14	68	62	552509	unclassified_viruses	Leptopilina_boulardi_filamentous_virus	NA	LbFV_like	LbFV_like	Viruses	NA	NA	NA	NA	NA	NA	NA	NA	NA	NA	NA	NA
110	Unclassified_ssRNA	Cluster11297	1	GL986074.1_1:53558-61832(-):Megachile_rotundata	Megachile_rotundata	GL986074.1_1_53558-61832_-__Megachile_rotundata	GL986074.1_1:Megachile_rotundata	26	NA	NA	102	131.308	131.308	YP_009179223	NA	5196	GL986074.1_1:Megachile_rotundata	26	6	21.3	3034	2153	0	5	2741	2584	5617	4.541e-208	722	5901	1746064	Riboviria	Shuangao_lacewing_virus_2	NA	Unknown	Unclassified ssRNA	Viruses	NA	NA	NA	NA	NA	NA	NA	NA	NA	NA	NA	NA
293	Unclassified_ssRNA	Cluster11297	2	LSNX01000230.1:4769-11477(+):Ceratina_calcarata	Ceratina_calcarata	LSNX01000230.1_4769-11477_+__Ceratina_calcarata	LSNX01000230.1:Ceratina_calcarata	1	NA	NA	NA	NA	NA	YP_009179225	NA	85596	LSNX01000230.1:Ceratina_calcarata	1	2	17.1	2277	1845	0	1	2227	2026	4302	5.562e-84	314	5175	1746061	Riboviria	Shayang_fly_virus_4	NA	Unknown	Unclassified ssRNA	Viruses	NA	NA	NA	NA	NA	NA	NA	NA	NA	NA	NA	NA
293	Unclassified_ssRNA	Cluster11297	2	LSNX01048950.1:2785-11818(-):Ceratina_calcarata	Ceratina_calcarata	LSNX01048950.1_2785-11818_-__Ceratina_calcarata	LSNX01048950.1:Ceratina_calcarata	NA	NA	NA	NA	NA	NA	YP_009179223	NA	85827	LSNX01048950.1:Ceratina_calcarata	NA	2	21.6	3194	2280	0	103	3011	2584	5777	1.516e-227	787	5901	1746064	Riboviria	Shuangao_lacewing_virus_2	NA	Unknown	Unclassified ssRNA	Viruses	NA	NA	NA	NA	NA	NA	NA	NA	NA	NA	NA	NA
130	Baculoviridae	Cluster11354	1	DF964188.1:1644-1860(-):Monomorium_pharaonis	Monomorium_pharaonis	DF964188.1_1644-1860_-__Monomorium_pharaonis	DF964188.1:Monomorium_pharaonis	2	NA	NA	NA	NA	NA	YP_006607847	NA	3111	DF964188.1:Monomorium_pharaonis	2	1	39.2	76	43	0	2	72	56	131	6.632e-09	54	139	307461	unclassified_Alphabaculovirus	Apocheima_cinerarium_nucleopolyhedrovirus	Alphabaculovirus	Baculoviridae	Baculoviridae	Viruses	NA	NA	NA	NA	NA	NA	NA	NA	NA	NA	NA	NA
204	Reoviridae	Cluster11392	1	jcf7180001988389:2144-2975(-):Synergus_japonicus	Synergus_japonicus	jcf7180001988389_2144-2975_-__Synergus_japonicus	jcf7180001988389:Synergus_japonicus	12	NA	NA	NA	NA	NA	YP_392505	NA	43231	jcf7180001988389:Synergus_japonicus	12	6	26.3	282	203	0	1	277	220	501	3.75e-23	104	620	352248	Riboviria	Operophtera_brumata_reovirus	NA	Reoviridae	Reoviridae	Viruses	NA	NA	NA	NA	NA	NA	NA	NA	NA	NA	NA	NA
204	Reoviridae	Cluster15744	3	jcf7180001983820:1273-3268(+):Synergus_japonicus	Synergus_japonicus	jcf7180001983820_1273-3268_+__Synergus_japonicus	jcf7180001983820:Synergus_japonicus	2	NA	NA	NA	NA	NA	YP_392501	NA	170066	jcf7180001983820:Synergus_japonicus	2	0	49.3	664	333	0	2	665	214	871	2.597e-188	604	1358	352248	Riboviria	Operophtera_brumata_reovirus	NA	Reoviridae	Reoviridae	Viruses	NA	NA	NA	NA	NA	NA	NA	NA	NA	NA	NA	NA
204	Reoviridae	Cluster15744	3	jcf7180001988059:2889-4542(-):Synergus_japonicus	Synergus_japonicus	jcf7180001988059_2889-4542_-__Synergus_japonicus	jcf7180001988059:Synergus_japonicus	5	NA	NA	NA	NA	NA	YP_392501	NA	43219	jcf7180001988059:Synergus_japonicus	5	2	42.5	573	316	0	1	551	94	666	6.479e-130	428	1358	352248	Riboviria	Operophtera_brumata_reovirus	NA	Reoviridae	Reoviridae	Viruses	NA	NA	NA	NA	NA	NA	NA	NA	NA	NA	NA	NA
204	Reoviridae	Cluster15744	3	jcf7180001990259:36338-37730(+):Synergus_japonicus	Synergus_japonicus	jcf7180001990259_36338-37730_+__Synergus_japonicus	jcf7180001990259:Synergus_japonicus	NA	NA	NA	NA	NA	NA	YP_392501	NA	51832	jcf7180001990259:Synergus_japonicus	NA	5	43.3	460	253	0	5	464	659	1105	1.504e-105	353	1358	352248	Riboviria	Operophtera_brumata_reovirus	NA	Reoviridae	Reoviridae	Viruses	NA	NA	NA	NA	NA	NA	NA	NA	NA	NA	NA	NA
204	Reoviridae	Cluster15744	3	jcf7180001991334_2-HSPs_+__Synergus_japonicus	Synergus_japonicus	jcf7180001991334_2-HSPs_+__Synergus_japonicus	jcf7180001991334:Synergus_japonicus	5	NA	NA	NA	NA	NA	YP_392501	NA	43259	jcf7180001991334:Synergus_japonicus	5	2	47.2	723	370	0	1	723	262	963	6.873e-193	621	1358	352248	Riboviria	Operophtera_brumata_reovirus	NA	Reoviridae	Reoviridae	Viruses	NA	NA	NA	NA	NA	NA	NA	NA	NA	NA	NA	NA
123	Phycodnaviridae	Cluster11728	1	NW_014464186.1_1:95618-96384(-):Microplitis_demolitor	Microplitis_demolitor	NW_014464186.1_1_95618-96384_-__Microplitis_demolitor	NW_014464186.1_1:Microplitis_demolitor	22	NA	NA	69	67.8707	67.8707	YP_008052449	NA	22095	NW_014464186.1_1:Microplitis_demolitor	22	10	39.9	95	53	0	1	89	5	99	2.083e-11	68	220	251749	unclassified_Prymnesiovirus	Phaeocystis_globosa_virus	Prymnesiovirus	Phycodnaviridae	Phycodnaviridae	Viruses	NA	NA	NA	NA	NA	NA	NA	NA	NA	NA	NA	NA
147	Nudiviridae	Cluster11825	3	UCOL01004067.1:14708-14855(+):Ormyrus_nitidulus	Ormyrus_nitidulus	UCOL01004067.1_14708-14855_+__Ormyrus_nitidulus	UCOL01004067.1:Ormyrus_nitidulus	NA	NA	NA	NA	NA	NA	YP_009553104	NA	173252	UCOL01004067.1:Ormyrus_nitidulus	NA	0	64.2	38	13	0	12	49	13	50	2.764e-08	51	50	2057187	unclassified_Nudiviridae	Drosophila_innubila_nudivirus	NA	Nudiviridae	Nudiviridae	Viruses	NA	NA	NA	NA	NA	NA	NA	NA	NA	NA	NA	NA
318	Lispiviridae	Cluster12625	1	scaffold_2524:886-1483(+):Cremastinae_B	Cremastinae_B	scaffold_2524_886-1483_+__Cremastinae_B	scaffold_2524:Cremastinae_B	2	NA	NA	NA	NA	NA	YP_009304417	Lispiviridae	83917	scaffold_2524:Cremastinae_B	2	4	24.1	199	150	0	1	199	199	397	1.387e-10	64	458	1608088	Riboviria	Tacheng_chengtivirus	Chengtivirus	Lispiviridae	Lispiviridae	Viruses	NA	NA	NA	NA	Mononegavirales	NA	NA	NA	Monjiviricetes	Haploviricotina	Negarnaviricota	NA
202	Lispiviridae	Cluster12625	10	AEAQ02065536.1:23384-23966(-):Solenopsis_invicta	Solenopsis_invicta	AEAQ02065536.1_23384-23966_-__Solenopsis_invicta	AEAQ02065536.1:Solenopsis_invicta	70	NA	NA	NA	NA	NA	YP_009304417	Lispiviridae	177	AEAQ02065536.1:Solenopsis_invicta	70	27	25.3	200	144	0	1	194	218	417	1.242e-12	70	458	1608088	Riboviria	Tacheng_chengtivirus	Chengtivirus	Lispiviridae	Lispiviridae	Viruses	NA	NA	NA	NA	Mononegavirales	NA	NA	NA	Monjiviricetes	Haploviricotina	Negarnaviricota	NA
202	Lispiviridae	Cluster12625	10	AEAQ02065768.1:86062-87136(+):Solenopsis_invicta	Solenopsis_invicta	AEAQ02065768.1_86062-87136_+__Solenopsis_invicta	AEAQ02065768.1:Solenopsis_invicta	38	NA	NA	NA	NA	NA	YP_009336884	Lispiviridae	259	AEAQ02065768.1:Solenopsis_invicta	38	12	19.7	358	287	0	1	358	19	376	4.025e-13	76	411	1923187	Riboviria	Hubei_rhabdo-like_virus_3	NA	Lispiviridae	Lispiviridae	Viruses	NA	NA	NA	NA	NA	NA	NA	NA	NA	NA	NA	NA
267	Unclassified	Cluster12625	11	NA	NA	NA	NA	NA	NA	NA	NA	NA	NA	NA	NA	NA	NA	NA	NA	NA	NA	NA	NA	NA	NA	NA	NA	NA	NA	NA	NA	NA	NA	NA	NA	NA	NA	NA	NA	NA	NA	NA	NA	NA	NA	NA	NA	NA	NA
6	Lispiviridae	Cluster12625	2	scaffold_63722:1121-1682(-):Eretmocerus_eremicus	Eretmocerus_eremicus	scaffold_63722_1121-1682_-__Eretmocerus_eremicus	scaffold_63722:Eretmocerus_eremicus	NA	NA	NA	NA	NA	NA	YP_009336884	Lispiviridae	82856	scaffold_63722:Eretmocerus_eremicus	NA	1	23.9	187	141	0	1	187	209	394	3.003e-09	60	411	1923187	Riboviria	Hubei_rhabdo-like_virus_3	NA	Lispiviridae	Lispiviridae	Viruses	NA	NA	NA	NA	NA	NA	NA	NA	NA	NA	NA	NA
335	Lispiviridae	Cluster12625	3	scaffold_2133:15077-15527(+):Encarsia_formosa	Encarsia_formosa	scaffold_2133_15077-15527_+__Encarsia_formosa	scaffold_2133:Encarsia_formosa	NA	NA	NA	92	22079.4	22079.4	YP_009336884	Lispiviridae	83491	scaffold_2133:Encarsia_formosa	NA	2	28.5	146	100	0	1	146	223	363	6.755e-11	64	411	1923187	Riboviria	Hubei_rhabdo-like_virus_3	NA	Lispiviridae	Lispiviridae	Viruses	NA	NA	NA	NA	NA	NA	NA	NA	NA	NA	NA	NA
206	Lispiviridae	Cluster12625	4	AOFN02000345.1_3_2-HSPs_+__Athalia_rosae	Athalia_rosae	AOFN02000345.1_3_2-HSPs_+__Athalia_rosae	AOFN02000345.1_3:Athalia_rosae	1	NA	NA	NA	NA	NA	YP_009336884	Lispiviridae	759	AOFN02000345.1_3:Athalia_rosae	1	1	44.5	141	78	0	2	142	244	384	1.404e-28	115	411	1923187	Riboviria	Hubei_rhabdo-like_virus_3	NA	Lispiviridae	Lispiviridae	Viruses	NA	NA	NA	NA	NA	NA	NA	NA	NA	NA	NA	NA
206	Lispiviridae	Cluster12625	4	jcf7180001987766:2692-3247(+):Synergus_japonicus	Synergus_japonicus	jcf7180001987766_2692-3247_+__Synergus_japonicus	jcf7180001987766:Synergus_japonicus	2	NA	NA	NA	NA	NA	YP_009336884	Lispiviridae	51758	jcf7180001987766:Synergus_japonicus	2	1	25.5	185	136	0	1	184	157	341	2.121e-11	66	411	1923187	Riboviria	Hubei_rhabdo-like_virus_3	NA	Lispiviridae	Lispiviridae	Viruses	NA	NA	NA	NA	NA	NA	NA	NA	NA	NA	NA	NA
284	Lispiviridae	Cluster12625	5	NJRQ01000621.1:8974-9607(-):Aphaenogaster_ashmeadi	Aphaenogaster_ashmeadi	NJRQ01000621.1_8974-9607_-__Aphaenogaster_ashmeadi	NJRQ01000621.1:Aphaenogaster_ashmeadi	9	NA	NA	NA	NA	NA	YP_009304417	Lispiviridae	15055	NJRQ01000621.1:Aphaenogaster_ashmeadi	9	13	26.8	171	122	0	2	169	218	388	2.168e-11	67	458	1608088	Riboviria	Tacheng_chengtivirus	Chengtivirus	Lispiviridae	Lispiviridae	Viruses	NA	NA	NA	NA	Mononegavirales	NA	NA	NA	Monjiviricetes	Haploviricotina	Negarnaviricota	NA
284	Lispiviridae	Cluster12625	7	NJRQ01000909.1:27199-27796(-):Aphaenogaster_ashmeadi	Aphaenogaster_ashmeadi	NJRQ01000909.1_27199-27796_-__Aphaenogaster_ashmeadi	NJRQ01000909.1:Aphaenogaster_ashmeadi	30	NA	NA	NA	NA	NA	YP_009336884	Lispiviridae	15056	NJRQ01000909.1:Aphaenogaster_ashmeadi	30	7	23.3	191	145	0	1	191	205	394	1.323e-08	59	411	1923187	Riboviria	Hubei_rhabdo-like_virus_3	NA	Lispiviridae	Lispiviridae	Viruses	NA	NA	NA	NA	NA	NA	NA	NA	NA	NA	NA	NA
66	Lispiviridae	Cluster12625	6	LBMM01007696.1_1:790-1402(-):Lasius_niger	Lasius_niger	LBMM01007696.1_1_790-1402_-__Lasius_niger	LBMM01007696.1_1:Lasius_niger	3	NA	NA	87	7994.58	7994.58	YP_009304417	Lispiviridae	11160	LBMM01007696.1_1:Lasius_niger	3	1	25.5	173	126	0	6	175	216	388	7.106e-10	63	458	1608088	Riboviria	Tacheng_chengtivirus	Chengtivirus	Lispiviridae	Lispiviridae	Viruses	NA	NA	NA	NA	Mononegavirales	NA	NA	NA	Monjiviricetes	Haploviricotina	Negarnaviricota	NA
359	Lispiviridae	Cluster12625	8	scaffold_1239_1:14324-14981(-):Leptopilina_boulardi	Leptopilina_boulardi	scaffold_1239_1_14324-14981_-__Leptopilina_boulardi	scaffold_1239_1:Leptopilina_boulardi	NA	NA	NA	1106	786.718	786.718	YP_009304417	Lispiviridae	44085	scaffold_1239_1:Leptopilina_boulardi	NA	2	22.3	215	166	0	1	215	206	419	4.354e-09	61	458	1608088	Riboviria	Tacheng_chengtivirus	Chengtivirus	Lispiviridae	Lispiviridae	Viruses	NA	NA	NA	NA	Mononegavirales	NA	NA	NA	Monjiviricetes	Haploviricotina	Negarnaviricota	NA
359	Lispiviridae	Cluster12625	8	scf7180005169031_0:1006-1909(+):Leptopilina_clavipes	Leptopilina_clavipes	scf7180005169031_0_1006-1909_+__Leptopilina_clavipes	scf7180005169031_0:Leptopilina_clavipes	NA	NA	NA	0	0	0	YP_009336884	Lispiviridae	64665	scf7180005169031_0:Leptopilina_clavipes	NA	2	20.2	306	239	0	1	301	55	360	4.041e-11	68	411	1923187	Riboviria	Hubei_rhabdo-like_virus_3	NA	Lispiviridae	Lispiviridae	Viruses	NA	NA	NA	NA	NA	NA	NA	NA	NA	NA	NA	NA
344	Lispiviridae	Cluster12625	9	NJRL01001977.1:17806-18568(-):Aphaenogaster_rudis	Aphaenogaster_rudis	NJRL01001977.1_17806-18568_-__Aphaenogaster_rudis	NJRL01001977.1:Aphaenogaster_rudis	3	NA	NA	NA	NA	NA	YP_009336884	Lispiviridae	13380	NJRL01001977.1:Aphaenogaster_rudis	3	3	22.9	254	191	0	1	249	142	395	2.297e-13	74	411	1923187	Riboviria	Hubei_rhabdo-like_virus_3	NA	Lispiviridae	Lispiviridae	Viruses	NA	NA	NA	NA	NA	NA	NA	NA	NA	NA	NA	NA
344	Lispiviridae	Cluster12625	9	NJRM01001449.1:11002-11764(+):Aphaenogaster_picea	Aphaenogaster_picea	NJRM01001449.1_11002-11764_+__Aphaenogaster_picea	NJRM01001449.1:Aphaenogaster_picea	4	NA	NA	NA	NA	NA	YP_009336884	Lispiviridae	13534	NJRM01001449.1:Aphaenogaster_picea	4	2	22.9	254	191	0	1	249	142	395	2.297e-13	74	411	1923187	Riboviria	Hubei_rhabdo-like_virus_3	NA	Lispiviridae	Lispiviridae	Viruses	NA	NA	NA	NA	NA	NA	NA	NA	NA	NA	NA	NA
82	Hepe-Virga	Cluster12959	1	scf7180005155831:188-704(+):Leptopilina_clavipes	Leptopilina_clavipes	scf7180005155831_188-704_+__Leptopilina_clavipes	scf7180005155831:Leptopilina_clavipes	2	NA	NA	0	0	0	YP_009337660	NA	64136	scf7180005155831:Leptopilina_clavipes	2	2	29.1	155	108	0	19	172	19	173	1.249e-12	70	195	1923336	Riboviria	Hubei_virga-like_virus_21	NA	Hepe-Virga	Hepe-Virga	Viruses	NA	NA	NA	NA	NA	NA	NA	NA	NA	NA	NA	NA
82	Hepe-Virga	Cluster5646	2	scf7180005155831:2164-2569(+):Leptopilina_clavipes	Leptopilina_clavipes	scf7180005155831_2164-2569_+__Leptopilina_clavipes	scf7180005155831:Leptopilina_clavipes	2	NA	NA	0	0	0	YP_009337662	NA	64135	scf7180005155831:Leptopilina_clavipes	2	2	33.1	135	86	0	1	135	18	146	1.18e-14	74	170	1923336	Riboviria	Hubei_virga-like_virus_21	NA	Hepe-Virga	Hepe-Virga	Viruses	NA	NA	NA	NA	NA	NA	NA	NA	NA	NA	NA	NA
341	Mono-Chu	Cluster13047	1	NJRL01001283.1:43816-44650(+):Aphaenogaster_rudis	Aphaenogaster_rudis	NJRL01001283.1_43816-44650_+__Aphaenogaster_rudis	NJRL01001283.1:Aphaenogaster_rudis	1	NA	NA	NA	NA	NA	YP_009336983	NA	13376	NJRL01001283.1:Aphaenogaster_rudis	1	4	20.7	270	206	0	9	278	36	296	7.577e-10	64	503	1923185	Riboviria	Hubei_rhabdo-like_virus_1	NA	Mono-Chu	Mono-Chu	Viruses	NA	NA	NA	NA	NA	NA	NA	NA	NA	NA	NA	NA
341	Mono-Chu	Cluster13047	1	NJRM01000846.1:57248-58082(+):Aphaenogaster_picea	Aphaenogaster_picea	NJRM01000846.1_57248-58082_+__Aphaenogaster_picea	NJRM01000846.1:Aphaenogaster_picea	1	NA	NA	NA	NA	NA	YP_009336983	NA	13524	NJRM01000846.1:Aphaenogaster_picea	1	3	20.8	270	206	0	9	278	36	296	4.214e-10	65	503	1923185	Riboviria	Hubei_rhabdo-like_virus_1	NA	Mono-Chu	Mono-Chu	Viruses	NA	NA	NA	NA	NA	NA	NA	NA	NA	NA	NA	NA
341	Mono-Chu	Cluster13047	1	NJRN01000902.1:11257-12091(-):Aphaenogaster_miamiana	Aphaenogaster_miamiana	NJRN01000902.1_11257-12091_-__Aphaenogaster_miamiana	NJRN01000902.1:Aphaenogaster_miamiana	1	NA	NA	NA	NA	NA	YP_009336983	NA	14042	NJRN01000902.1:Aphaenogaster_miamiana	1	4	20.7	270	206	0	9	278	36	296	5.651e-10	64	503	1923185	Riboviria	Hubei_rhabdo-like_virus_1	NA	Mono-Chu	Mono-Chu	Viruses	NA	NA	NA	NA	NA	NA	NA	NA	NA	NA	NA	NA
341	Mono-Chu	Cluster13047	1	NJRO01001872.1:14141-14975(-):Aphaenogaster_fulva	Aphaenogaster_fulva	NJRO01001872.1_14141-14975_-__Aphaenogaster_fulva	NJRO01001872.1:Aphaenogaster_fulva	1	NA	NA	NA	NA	NA	YP_009336983	NA	14447	NJRO01001872.1:Aphaenogaster_fulva	1	1	20.7	270	206	0	9	278	36	296	7.577e-10	64	503	1923185	Riboviria	Hubei_rhabdo-like_virus_1	NA	Mono-Chu	Mono-Chu	Viruses	NA	NA	NA	NA	NA	NA	NA	NA	NA	NA	NA	NA
244	Phenuiviridae	Cluster13229	1	scaffold_974:9967-10633(+):Trichopria_sp_970989	Trichopria_sp_970989	scaffold_974_9967-10633_+__Trichopria_sp_970989	scaffold_974:Trichopria_sp_970989	NA	NA	NA	NA	NA	NA	YP_009505329	NA	47912	scaffold_974:Trichopria_sp_970989	NA	1	23.2	208	154	0	16	217	18	225	7.594e-10	63	269	1980609	Riboviria	Badu_phasivirus	Phasivirus	Phenuiviridae	Phenuiviridae	Viruses	NA	NA	NA	NA	Bunyavirales	NA	NA	NA	Ellioviricetes	Polyploviricotina	Negarnaviricota	NA
244	Phenuiviridae	Cluster13229	9	scaffold_5867:15310-16123(-):Trichopria_sp_970989	Trichopria_sp_970989	scaffold_5867_15310-16123_-__Trichopria_sp_970989	scaffold_5867:Trichopria_sp_970989	NA	NA	NA	NA	NA	NA	YP_009346029	NA	46035	scaffold_5867:Trichopria_sp_970989	NA	0	20.2	268	196	0	4	271	2	247	7.22e-09	61	247	1926502	Riboviria	Urucuri_virus	Phlebovirus	Phenuiviridae	Phenuiviridae	Viruses	NA	NA	NA	NA	Bunyavirales	NA	NA	NA	Ellioviricetes	Polyploviricotina	Negarnaviricota	NA
89	Phenuiviridae	Cluster13229	10	scf7180005174759:1862-2417(+):Leptopilina_clavipes	Leptopilina_clavipes	scf7180005174759_1862-2417_+__Leptopilina_clavipes	scf7180005174759:Leptopilina_clavipes	NA	NA	NA	0	0	0	YP_009666270	NA	166137	scf7180005174759:Leptopilina_clavipes	NA	0	33.7	184	121	0	3	185	5	188	1.543e-23	102	263	1911436	Riboviria	Pidgey_pidchovirus	Pidchovirus	Phenuiviridae	Phenuiviridae	Viruses	NA	NA	NA	NA	Bunyavirales	NA	NA	NA	Ellioviricetes	Polyploviricotina	Negarnaviricota	NA
89	Phenuiviridae	Cluster13229	10	scf7180005174759:2583-3246(+):Leptopilina_clavipes	Leptopilina_clavipes	scf7180005174759_2583-3246_+__Leptopilina_clavipes	scf7180005174759:Leptopilina_clavipes	NA	NA	NA	0	0	0	YP_009666270	NA	166121	scf7180005174759:Leptopilina_clavipes	NA	0	32.4	220	145	0	1	220	13	228	3.308e-27	114	263	1911436	Riboviria	Pidgey_pidchovirus	Pidchovirus	Phenuiviridae	Phenuiviridae	Viruses	NA	NA	NA	NA	Bunyavirales	NA	NA	NA	Ellioviricetes	Polyploviricotina	Negarnaviricota	NA
342	Phenuiviridae	Cluster13229	11	NJRL01006314.1:838-1474(+):Aphaenogaster_rudis	Aphaenogaster_rudis	NJRL01006314.1_838-1474_+__Aphaenogaster_rudis	NJRL01006314.1:Aphaenogaster_rudis	NA	NA	NA	NA	NA	NA	AEL29679	NA	92425	NJRL01006314.1:Aphaenogaster_rudis	NA	1	22.9	167	99	0	21	187	22	151	9.072e-06	50	252	487097	Riboviria	Uukuniemi_phlebovirus	Phlebovirus	Phenuiviridae	Phenuiviridae	Viruses	NA	NA	NA	NA	Bunyavirales	NA	NA	NA	Ellioviricetes	Polyploviricotina	Negarnaviricota	NA
342	Phenuiviridae	Cluster13229	11	NJRN01003014.1:547-1123(-):Aphaenogaster_miamiana	Aphaenogaster_miamiana	NJRN01003014.1_547-1123_-__Aphaenogaster_miamiana	NJRN01003014.1:Aphaenogaster_miamiana	4	NA	NA	NA	NA	NA	AEL29679	NA	14059	NJRN01003014.1:Aphaenogaster_miamiana	4	2	23.1	167	99	0	1	167	22	151	3.555e-06	51	252	487097	Riboviria	Uukuniemi_phlebovirus	Phlebovirus	Phenuiviridae	Phenuiviridae	Viruses	NA	NA	NA	NA	Bunyavirales	NA	NA	NA	Ellioviricetes	Polyploviricotina	Negarnaviricota	NA
55	Phenuiviridae	Cluster13229	2	scaffold_119:1373-2111(+):Ichneumoninae_A	Ichneumoninae_A	scaffold_119_1373-2111_+__Ichneumoninae_A	scaffold_119:Ichneumoninae_A	NA	NA	NA	NA	NA	NA	AGC60110	NA	43839	scaffold_119:Ichneumoninae_A	NA	7	21.6	221	168	0	1	215	7	227	4.044e-08	58	247	1213620	Riboviria	Bhanja_virus	Phlebovirus	Phenuiviridae	Phenuiviridae	Viruses	NA	NA	NA	NA	Bunyavirales	NA	NA	NA	Ellioviricetes	Polyploviricotina	Negarnaviricota	NA
94	Phenuiviridae	Cluster13229	3	scaffold_2733_2:1952-2711(+):Leptopilina_heterotoma	Leptopilina_heterotoma	scaffold_2733_2_1952-2711_+__Leptopilina_heterotoma	scaffold_2733_2:Leptopilina_heterotoma	NA	NA	NA	2174	1530.16	1530.16	AEA30067	NA	166146	scaffold_2733_2:Leptopilina_heterotoma	NA	0	20.7	252	173	0	1	252	20	238	7.611e-09	61	244	629726	Riboviria	Candiru_phlebovirus	Phlebovirus	Phenuiviridae	Phenuiviridae	Viruses	NA	NA	NA	NA	Bunyavirales	NA	NA	NA	Ellioviricetes	Polyploviricotina	Negarnaviricota	NA
295	Phenuiviridae	Cluster13229	4	NJRQ01000062.1:710637-711375(+):Aphaenogaster_ashmeadi	Aphaenogaster_ashmeadi	NJRQ01000062.1_710637-711375_+__Aphaenogaster_ashmeadi	NJRQ01000062.1:Aphaenogaster_ashmeadi	4	NA	NA	NA	NA	NA	YP_009304999	NA	14850	NJRQ01000062.1:Aphaenogaster_ashmeadi	4	40	23.6	166	119	0	57	213	56	221	2.468e-06	53	270	1608101	Riboviria	Fly_wubeivirus	Wubeivirus	Phenuiviridae	Phenuiviridae	Viruses	NA	NA	NA	NA	Bunyavirales	NA	NA	NA	Ellioviricetes	Polyploviricotina	Negarnaviricota	NA
266	Phenuiviridae	Cluster13229	5	LD336076.1_27:62529-62772(+):Wasmannia_auropunctata	Wasmannia_auropunctata	LD336076.1_27_62529-62772_+__Wasmannia_auropunctata	LD336076.1_27:Wasmannia_auropunctata	9	NA	NA	NA	NA	NA	YP_009304999	NA	11365	LD336076.1_27:Wasmannia_auropunctata	9	0	44.5	70	36	0	1	70	57	121	2.19e-10	59	270	1608101	Riboviria	Fly_wubeivirus	Wubeivirus	Phenuiviridae	Phenuiviridae	Viruses	NA	NA	NA	NA	Bunyavirales	NA	NA	NA	Ellioviricetes	Polyploviricotina	Negarnaviricota	NA
320	Phenuiviridae	Cluster13229	6	CABEGB010000831.1:203540-204422(-):Crematogaster_levior	Crematogaster_levior	CABEGB010000831.1_203540-204422_-__Crematogaster_levior	CABEGB010000831.1:Crematogaster_levior	95	NA	NA	NA	NA	NA	YP_009304999	NA	1276	CABEGB010000831.1:Crematogaster_levior	95	48	22.6	190	127	0	105	294	58	222	7.129e-07	55	270	1608101	Riboviria	Fly_wubeivirus	Wubeivirus	Phenuiviridae	Phenuiviridae	Viruses	NA	NA	NA	NA	Bunyavirales	NA	NA	NA	Ellioviricetes	Polyploviricotina	Negarnaviricota	NA
320	Phenuiviridae	Cluster13229	8	CABEGB010000831.1:221619-222120(-):Crematogaster_levior	Crematogaster_levior	CABEGB010000831.1_221619-222120_-__Crematogaster_levior	CABEGB010000831.1:Crematogaster_levior	95	NA	NA	NA	NA	NA	YP_009304999	NA	1285	CABEGB010000831.1:Crematogaster_levior	95	48	25.1	158	90	0	8	165	6	126	5.345e-08	56	270	1608101	Riboviria	Fly_wubeivirus	Wubeivirus	Phenuiviridae	Phenuiviridae	Viruses	NA	NA	NA	NA	Bunyavirales	NA	NA	NA	Ellioviricetes	Polyploviricotina	Negarnaviricota	NA
260	Phenuiviridae	Cluster13229	7	DF939227.1:532432-533170(+):Vollenhovia_emeryi	Vollenhovia_emeryi	DF939227.1_532432-533170_+__Vollenhovia_emeryi	DF939227.1:Vollenhovia_emeryi	16	NA	NA	NA	NA	NA	YP_009304999	NA	2777	DF939227.1:Vollenhovia_emeryi	16	39	23.6	162	117	0	92	245	58	219	5.927e-06	51	270	1608101	Riboviria	Fly_wubeivirus	Wubeivirus	Phenuiviridae	Phenuiviridae	Viruses	NA	NA	NA	NA	Bunyavirales	NA	NA	NA	Ellioviricetes	Polyploviricotina	Negarnaviricota	NA
120	Artoviridae	Cluster13237	1	scaffold_125:37962-38739(+):Meteorus_cinctellus	Meteorus_cinctellus	scaffold_125_37962-38739_+__Meteorus_cinctellus	scaffold_125:Meteorus_cinctellus	NA	NA	NA	NA	NA	NA	YP_009505431	NA	59731	scaffold_125:Meteorus_cinctellus	NA	13	23.4	263	198	0	1	259	95	357	3.75e-15	80	402	1926633	Riboviria	Pteromalus_puparum_peropuvirus	Peropuvirus	Artoviridae	Artoviridae	Viruses	NA	NA	NA	NA	Mononegavirales	NA	NA	NA	Monjiviricetes	Haploviricotina	Negarnaviricota	NA
150	Artoviridae	Cluster13237	10	UCOM01004536.1:10314-11310(-):Ormyrus_pomaceus	Ormyrus_pomaceus	UCOM01004536.1_10314-11310_-__Ormyrus_pomaceus	UCOM01004536.1:Ormyrus_pomaceus	1	NA	NA	NA	NA	NA	YP_009505431	NA	55931	UCOM01004536.1:Ormyrus_pomaceus	1	1	38.8	332	203	0	1	332	22	353	3.188e-62	221	402	1926633	Riboviria	Pteromalus_puparum_peropuvirus	Peropuvirus	Artoviridae	Artoviridae	Viruses	NA	NA	NA	NA	Mononegavirales	NA	NA	NA	Monjiviricetes	Haploviricotina	Negarnaviricota	NA
45	Artoviridae	Cluster13237	11	scaffold_131761:1-427(-):Ganaspis_ganaspis	Ganaspis_ganaspis	scaffold_131761_1-427_-__Ganaspis_ganaspis	scaffold_131761:Ganaspis_ganaspis	NA	NA	NA	NA	NA	NA	YP_009505431	NA	155960	scaffold_131761:Ganaspis_ganaspis	NA	0	30.6	142	98	0	1	142	170	311	6.538e-13	69	402	1926633	Riboviria	Pteromalus_puparum_peropuvirus	Peropuvirus	Artoviridae	Artoviridae	Viruses	NA	NA	NA	NA	Mononegavirales	NA	NA	NA	Monjiviricetes	Haploviricotina	Negarnaviricota	NA
365	Artoviridae	Cluster13237	12	scaffold_3322:2659-3367(-):Meteorus_colon_F	Meteorus_colon_F	scaffold_3322_2659-3367_-__Meteorus_colon_F	scaffold_3322:Meteorus_colon_F	1	NA	NA	NA	NA	NA	YP_009505431	NA	59355	scaffold_3322:Meteorus_colon_F	1	2	24.1	224	169	0	1	224	21	244	7.236e-13	72	402	1926633	Riboviria	Pteromalus_puparum_peropuvirus	Peropuvirus	Artoviridae	Artoviridae	Viruses	NA	NA	NA	NA	Mononegavirales	NA	NA	NA	Monjiviricetes	Haploviricotina	Negarnaviricota	NA
365	Artoviridae	Cluster13237	12	scaffold_811:2659-3367(-):Meteorus_colon_M	Meteorus_colon_M	scaffold_811_2659-3367_-__Meteorus_colon_M	scaffold_811:Meteorus_colon_M	2	NA	NA	NA	NA	NA	YP_009505431	NA	58931	scaffold_811:Meteorus_colon_M	2	1	24.1	224	169	0	1	224	21	244	7.236e-13	72	402	1926633	Riboviria	Pteromalus_puparum_peropuvirus	Peropuvirus	Artoviridae	Artoviridae	Viruses	NA	NA	NA	NA	Mononegavirales	NA	NA	NA	Monjiviricetes	Haploviricotina	Negarnaviricota	NA
210	Artoviridae	Cluster13237	13	QBLH01000331.1:381155-381680(-):Temnothorax_longispinosus	Temnothorax_longispinosus	QBLH01000331.1_381155-381680_-__Temnothorax_longispinosus	QBLH01000331.1:Temnothorax_longispinosus	8	NA	NA	12	57.0361	57.0361	YP_009505431	NA	36730	QBLH01000331.1:Temnothorax_longispinosus	8	43	32.2	175	118	0	1	175	169	343	6.883e-20	91	402	1926633	Riboviria	Pteromalus_puparum_peropuvirus	Peropuvirus	Artoviridae	Artoviridae	Viruses	NA	NA	NA	NA	Mononegavirales	NA	NA	NA	Monjiviricetes	Haploviricotina	Negarnaviricota	NA
210	Artoviridae	Cluster13237	13	QBLH01000376.1:119094-119628(-):Temnothorax_longispinosus	Temnothorax_longispinosus	QBLH01000376.1_119094-119628_-__Temnothorax_longispinosus	QBLH01000376.1:Temnothorax_longispinosus	15	NA	NA	0	0	0	YP_009505431	NA	36744	QBLH01000376.1:Temnothorax_longispinosus	15	57	30.5	178	123	0	1	178	176	353	6.004e-18	85	402	1926633	Riboviria	Pteromalus_puparum_peropuvirus	Peropuvirus	Artoviridae	Artoviridae	Viruses	NA	NA	NA	NA	Mononegavirales	NA	NA	NA	Monjiviricetes	Haploviricotina	Negarnaviricota	NA
193	Artoviridae	Cluster13237	14	scaffold_17313:1655-2285(+):Psyttalia_lounsbury	Psyttalia_lounsbury	scaffold_17313_1655-2285_+__Psyttalia_lounsbury	scaffold_17313:Psyttalia_lounsbury	NA	NA	NA	NA	NA	NA	YP_009333442	Artoviridae	155941	scaffold_17313:Psyttalia_lounsbury	NA	0	25.2	179	133	0	2	180	234	412	4.408e-10	63	469	1922651	Riboviria	Beihai_rhabdo-like_virus_1	NA	Artoviridae	Artoviridae	Viruses	NA	NA	NA	NA	NA	NA	NA	NA	NA	NA	NA	NA
88	Artoviridae	Cluster13237	15	scf7180005165721:3459-3810(+):Leptopilina_clavipes	Leptopilina_clavipes	scf7180005165721_3459-3810_+__Leptopilina_clavipes	scf7180005165721:Leptopilina_clavipes	3	NA	NA	0	0	0	YP_009505431	NA	64599	scf7180005165721:Leptopilina_clavipes	3	2	33.3	106	70	0	1	106	165	270	6.89e-10	59	402	1926633	Riboviria	Pteromalus_puparum_peropuvirus	Peropuvirus	Artoviridae	Artoviridae	Viruses	NA	NA	NA	NA	Mononegavirales	NA	NA	NA	Monjiviricetes	Haploviricotina	Negarnaviricota	NA
88	Artoviridae	Cluster13237	15	scf7180005174455_2:5052-5625(+):Leptopilina_clavipes	Leptopilina_clavipes	scf7180005174455_2_5052-5625_+__Leptopilina_clavipes	scf7180005174455_2:Leptopilina_clavipes	NA	NA	NA	0	0	0	YP_009505431	NA	155946	scf7180005174455_2:Leptopilina_clavipes	NA	0	27.7	187	134	0	5	191	168	354	6.067e-15	77	402	1926633	Riboviria	Pteromalus_puparum_peropuvirus	Peropuvirus	Artoviridae	Artoviridae	Viruses	NA	NA	NA	NA	Mononegavirales	NA	NA	NA	Monjiviricetes	Haploviricotina	Negarnaviricota	NA
181	Artoviridae	Cluster13237	16	KQ465211.1:787334-788024(+):Polistes_canadensis	Polistes_canadensis	KQ465211.1_787334-788024_+__Polistes_canadensis	KQ465211.1:Polistes_canadensis	NA	NA	NA	NA	NA	NA	YP_009505431	NA	9857	KQ465211.1:Polistes_canadensis	NA	71	24.1	225	168	0	1	223	105	329	6.372e-13	72	402	1926633	Riboviria	Pteromalus_puparum_peropuvirus	Peropuvirus	Artoviridae	Artoviridae	Viruses	NA	NA	NA	NA	Mononegavirales	NA	NA	NA	Monjiviricetes	Haploviricotina	Negarnaviricota	NA
161	Artoviridae	Cluster13237	18	scaffold_23087:848-1484(-):Platygaster_equestris	Platygaster_equestris	scaffold_23087_848-1484_-__Platygaster_equestris	scaffold_23087:Platygaster_equestris	1	NA	NA	NA	NA	NA	YP_009505431	NA	54966	scaffold_23087:Platygaster_equestris	1	1	25.8	190	138	0	23	212	170	356	3.572e-12	70	402	1926633	Riboviria	Pteromalus_puparum_peropuvirus	Peropuvirus	Artoviridae	Artoviridae	Viruses	NA	NA	NA	NA	Mononegavirales	NA	NA	NA	Monjiviricetes	Haploviricotina	Negarnaviricota	NA
161	Artoviridae	Cluster13237	18	scaffold_29360:727-1369(+):Platygaster_equestris	Platygaster_equestris	scaffold_29360_727-1369_+__Platygaster_equestris	scaffold_29360:Platygaster_equestris	1	NA	NA	NA	NA	NA	YP_009505431	NA	155953	scaffold_29360:Platygaster_equestris	1	0	22.2	242	163	0	5	214	100	341	3.139e-11	67	402	1926633	Riboviria	Pteromalus_puparum_peropuvirus	Peropuvirus	Artoviridae	Artoviridae	Viruses	NA	NA	NA	NA	Mononegavirales	NA	NA	NA	Monjiviricetes	Haploviricotina	Negarnaviricota	NA
161	Artoviridae	Cluster13237	18	scaffold_39545:41-815(+):Platygaster_equestris	Platygaster_equestris	scaffold_39545_41-815_+__Platygaster_equestris	scaffold_39545:Platygaster_equestris	NA	NA	NA	NA	NA	NA	YP_009505431	NA	155944	scaffold_39545:Platygaster_equestris	NA	0	22.7	231	177	0	1	231	144	373	9.686e-11	66	402	1926633	Riboviria	Pteromalus_puparum_peropuvirus	Peropuvirus	Artoviridae	Artoviridae	Viruses	NA	NA	NA	NA	Mononegavirales	NA	NA	NA	Monjiviricetes	Haploviricotina	Negarnaviricota	NA
161	Artoviridae	Cluster13237	18	scaffold_46202:41-644(+):Platygaster_equestris	Platygaster_equestris	scaffold_46202_41-644_+__Platygaster_equestris	scaffold_46202:Platygaster_equestris	NA	NA	NA	NA	NA	NA	YP_009505431	NA	155964	scaffold_46202:Platygaster_equestris	NA	0	23.2	201	151	0	1	201	144	341	2.241e-09	61	402	1926633	Riboviria	Pteromalus_puparum_peropuvirus	Peropuvirus	Artoviridae	Artoviridae	Viruses	NA	NA	NA	NA	Mononegavirales	NA	NA	NA	Monjiviricetes	Haploviricotina	Negarnaviricota	NA
161	Artoviridae	Cluster13237	25	scaffold_16799:2506-3022(+):Platygaster_equestris	Platygaster_equestris	scaffold_16799_2506-3022_+__Platygaster_equestris	scaffold_16799:Platygaster_equestris	1	NA	NA	NA	NA	NA	YP_009505431	NA	155932	scaffold_16799:Platygaster_equestris	1	0	28.3	164	117	0	1	164	170	333	6.72e-13	70	402	1926633	Riboviria	Pteromalus_puparum_peropuvirus	Peropuvirus	Artoviridae	Artoviridae	Viruses	NA	NA	NA	NA	Mononegavirales	NA	NA	NA	Monjiviricetes	Haploviricotina	Negarnaviricota	NA
305	Artoviridae	Cluster13237	19	scaffold_29899:3003-3708(+):Copidosoma_sp	Copidosoma_sp	scaffold_29899_3003-3708_+__Copidosoma_sp	scaffold_29899:Copidosoma_sp	2	NA	NA	NA	NA	NA	YP_009505431	NA	84261	scaffold_29899:Copidosoma_sp	2	1	29.5	183	128	0	42	224	161	343	1.936e-16	83	402	1926633	Riboviria	Pteromalus_puparum_peropuvirus	Peropuvirus	Artoviridae	Artoviridae	Viruses	NA	NA	NA	NA	Mononegavirales	NA	NA	NA	Monjiviricetes	Haploviricotina	Negarnaviricota	NA
305	Artoviridae	Cluster13237	19	scaffold_42200:1586-2162(-):Copidosoma_sp	Copidosoma_sp	scaffold_42200_1586-2162_-__Copidosoma_sp	scaffold_42200:Copidosoma_sp	2	NA	NA	NA	NA	NA	YP_009505431	NA	155962	scaffold_42200:Copidosoma_sp	2	0	32.1	179	121	0	1	179	163	341	3.482e-20	93	402	1926633	Riboviria	Pteromalus_puparum_peropuvirus	Peropuvirus	Artoviridae	Artoviridae	Viruses	NA	NA	NA	NA	Mononegavirales	NA	NA	NA	Monjiviricetes	Haploviricotina	Negarnaviricota	NA
126	Artoviridae	Cluster13237	2	NW_014463992.1_1:5420-6002(+):Microplitis_demolitor	Microplitis_demolitor	NW_014463992.1_1_5420-6002_+__Microplitis_demolitor	NW_014463992.1_1:Microplitis_demolitor	35	NA	NA	10	12.9408	12.9408	YP_009505431	NA	21539	NW_014463992.1_1:Microplitis_demolitor	35	12	29.9	183	128	0	12	194	169	351	1.357e-17	85	402	1926633	Riboviria	Pteromalus_puparum_peropuvirus	Peropuvirus	Artoviridae	Artoviridae	Viruses	NA	NA	NA	NA	Mononegavirales	NA	NA	NA	Monjiviricetes	Haploviricotina	Negarnaviricota	NA
148	Artoviridae	Cluster13237	22	UCOL01012647.1:2709-3768(-):Ormyrus_nitidulus	Ormyrus_nitidulus	UCOL01012647.1_2709-3768_-__Ormyrus_nitidulus	UCOL01012647.1:Ormyrus_nitidulus	1	NA	NA	NA	NA	NA	YP_009505431	NA	56184	UCOL01012647.1:Ormyrus_nitidulus	1	2	36.9	353	222	0	1	353	1	353	4.325e-61	219	402	1926633	Riboviria	Pteromalus_puparum_peropuvirus	Peropuvirus	Artoviridae	Artoviridae	Viruses	NA	NA	NA	NA	Mononegavirales	NA	NA	NA	Monjiviricetes	Haploviricotina	Negarnaviricota	NA
148	Artoviridae	Cluster13237	9	UCOL01013241.1:31-1090(+):Ormyrus_nitidulus	Ormyrus_nitidulus	UCOL01013241.1_31-1090_+__Ormyrus_nitidulus	UCOL01013241.1:Ormyrus_nitidulus	2	NA	NA	NA	NA	NA	YP_009505431	NA	41270	UCOL01013241.1:Ormyrus_nitidulus	2	1	35.4	353	227	0	1	353	1	353	1.24e-56	206	402	1926633	Riboviria	Pteromalus_puparum_peropuvirus	Peropuvirus	Artoviridae	Artoviridae	Viruses	NA	NA	NA	NA	Mononegavirales	NA	NA	NA	Monjiviricetes	Haploviricotina	Negarnaviricota	NA
90	Artoviridae	Cluster13237	3	NJRN01006300.1:548-1049(-):Aphaenogaster_miamiana	Aphaenogaster_miamiana	NJRN01006300.1_548-1049_-__Aphaenogaster_miamiana	NJRN01006300.1:Aphaenogaster_miamiana	1	NA	NA	NA	NA	NA	YP_009505431	NA	92875	NJRN01006300.1:Aphaenogaster_miamiana	1	1	31.8	167	113	0	1	167	187	353	4.154e-18	85	402	1926633	Riboviria	Pteromalus_puparum_peropuvirus	Peropuvirus	Artoviridae	Artoviridae	Viruses	NA	NA	NA	NA	Mononegavirales	NA	NA	NA	Monjiviricetes	Haploviricotina	Negarnaviricota	NA
90	Artoviridae	Cluster6003	29	NJRN01003408.1:38-4437(+):Aphaenogaster_miamiana	Aphaenogaster_miamiana	NJRN01003408.1_38-4437_+__Aphaenogaster_miamiana	NJRN01003408.1:Aphaenogaster_miamiana	2	NA	NA	NA	NA	NA	YP_009505433	NA	543308	NJRN01003408.1:Aphaenogaster_miamiana	2	0	61.9	597	227	0	3	599	16	612	2.179e-217	722	2166	1926633	Pteromalus_puparum_negative-strand_RNA_virus_1	Pteromalus_puparum_peropuvirus	Peropuvirus	Artoviridae	Artoviridae	Viruses	NA	NA	NA	NA	Mononegavirales	NA	NA	NA	Monjiviricetes	Haploviricotina	Negarnaviricota	Orthornavirae
90	Artoviridae	Cluster6003	72	NJRN01003569.1:76-4714(-):Aphaenogaster_miamiana	Aphaenogaster_miamiana	NJRN01003569.1_76-4714_-__Aphaenogaster_miamiana	NJRN01003569.1:Aphaenogaster_miamiana	1	NA	NA	NA	NA	NA	YP_009505433	NA	109440	NJRN01003569.1:Aphaenogaster_miamiana	1	0	60.9	1539	601	0	1	1539	3	1541	0	1821	2166	1926633	Pteromalus_puparum_negative-strand_RNA_virus_1	Pteromalus_puparum_peropuvirus	Peropuvirus	Artoviridae	Artoviridae	Viruses	NA	NA	NA	NA	Mononegavirales	NA	NA	NA	Monjiviricetes	Haploviricotina	Negarnaviricota	Orthornavirae
258	Artoviridae	Cluster13237	4	DF941195.1:4588-5239(+):Vollenhovia_emeryi	Vollenhovia_emeryi	DF941195.1_4588-5239_+__Vollenhovia_emeryi	DF941195.1:Vollenhovia_emeryi	2	NA	NA	NA	NA	NA	YP_009505431	NA	2885	DF941195.1:Vollenhovia_emeryi	2	2	30.2	191	133	0	27	217	164	354	6.515e-19	90	402	1926633	Riboviria	Pteromalus_puparum_peropuvirus	Peropuvirus	Artoviridae	Artoviridae	Viruses	NA	NA	NA	NA	Mononegavirales	NA	NA	NA	Monjiviricetes	Haploviricotina	Negarnaviricota	NA
258	Artoviridae	Cluster6003	200	DF939372.1:16137-19039(-):Vollenhovia_emeryi	Vollenhovia_emeryi	DF939372.1_16137-19039_-__Vollenhovia_emeryi	DF939372.1:Vollenhovia_emeryi	20	NA	NA	NA	NA	NA	YP_009505433	NA	10620	DF939372.1:Vollenhovia_emeryi	20	0	66.3	647	218	0	30	676	461	1107	3.984e-268	850	2166	1926633	Pteromalus_puparum_negative-strand_RNA_virus_1	Pteromalus_puparum_peropuvirus	Peropuvirus	Artoviridae	Artoviridae	Viruses	NA	NA	NA	NA	Mononegavirales	NA	NA	NA	Monjiviricetes	Haploviricotina	Negarnaviricota	Orthornavirae
78	Artoviridae	Cluster13237	5	IDBA_scaffold_1384:12748-13312(-):Leptopilina_boulardi	Leptopilina_boulardi	IDBA_scaffold_1384_12748-13312_-__Leptopilina_boulardi	IDBA_scaffold_1384:Leptopilina_boulardi	NA	NA	NA	15	12.426	12.426	YP_009505431	NA	65100	IDBA_scaffold_1384:Leptopilina_boulardi	NA	2	29.9	163	114	0	1	163	170	332	1.407e-14	76	402	1926633	Riboviria	Pteromalus_puparum_peropuvirus	Peropuvirus	Artoviridae	Artoviridae	Viruses	NA	NA	NA	NA	Mononegavirales	NA	NA	NA	Monjiviricetes	Haploviricotina	Negarnaviricota	NA
182	Artoviridae	Cluster13237	6	NW_015149098.1:369875-370619(+):Polistes_dominula	Polistes_dominula	NW_015149098.1_369875-370619_+__Polistes_dominula	NW_015149098.1:Polistes_dominula	195	NA	NA	NA	NA	NA	YP_009505431	NA	24111	NW_015149098.1:Polistes_dominula	195	64	26.1	248	180	0	5	248	137	384	4.362e-19	91	402	1926633	Riboviria	Pteromalus_puparum_peropuvirus	Peropuvirus	Artoviridae	Artoviridae	Viruses	NA	NA	NA	NA	Mononegavirales	NA	NA	NA	Monjiviricetes	Haploviricotina	Negarnaviricota	NA
296	Artoviridae	Cluster13237	7	KI629975.1:9040143-9040542(+):Ceratosolen_solmsi	Ceratosolen_solmsi	KI629975.1_9040143-9040542_+__Ceratosolen_solmsi	KI629975.1:Ceratosolen_solmsi	10	NA	NA	0	0	0	YP_009505431	NA	8731	KI629975.1:Ceratosolen_solmsi	10	465	28.2	136	95	0	1	133	218	353	2.258e-09	59	402	1926633	Riboviria	Pteromalus_puparum_peropuvirus	Peropuvirus	Artoviridae	Artoviridae	Viruses	NA	NA	NA	NA	Mononegavirales	NA	NA	NA	Monjiviricetes	Haploviricotina	Negarnaviricota	NA
296	Artoviridae	Cluster13237	8	KI629975.1:9030175-9030862(+):Ceratosolen_solmsi	Ceratosolen_solmsi	KI629975.1_9030175-9030862_+__Ceratosolen_solmsi	KI629975.1:Ceratosolen_solmsi	10	NA	NA	0	0	0	YP_009505431	NA	8729	KI629975.1:Ceratosolen_solmsi	10	465	30.8	227	156	0	1	227	113	339	2.426e-25	109	402	1926633	Riboviria	Pteromalus_puparum_peropuvirus	Peropuvirus	Artoviridae	Artoviridae	Viruses	NA	NA	NA	NA	Mononegavirales	NA	NA	NA	Monjiviricetes	Haploviricotina	Negarnaviricota	NA
107	Phenuiviridae	Cluster13438	1	MVJL01000888.1:65284-71353(-):Macrocentrus_cingulum	Macrocentrus_cingulum	MVJL01000888.1_65284-71353_-__Macrocentrus_cingulum	MVJL01000888.1:Macrocentrus_cingulum	NA	NA	NA	NA	NA	NA	YP_009305143	NA	61460	MVJL01000888.1:Macrocentrus_cingulum	NA	6	42.4	2020	1149	0	27	2022	46	2065	0	1498	2089	1608144	Riboviria	Yichang_insect_goukovirus	Goukovirus	Phenuiviridae	Phenuiviridae	Viruses	NA	NA	NA	NA	Bunyavirales	NA	NA	NA	Ellioviricetes	Polyploviricotina	Negarnaviricota	NA
107	Phenuiviridae	Cluster13438	1	MVJL01006539.1:7654-13717(-):Macrocentrus_cingulum	Macrocentrus_cingulum	MVJL01006539.1_7654-13717_-__Macrocentrus_cingulum	MVJL01006539.1:Macrocentrus_cingulum	NA	NA	NA	NA	NA	NA	YP_009305143	NA	11750	MVJL01006539.1:Macrocentrus_cingulum	NA	21	40.5	2039	1202	0	1	2021	25	2063	0	1418	2089	1608144	Riboviria	Yichang_insect_goukovirus	Goukovirus	Phenuiviridae	Phenuiviridae	Viruses	NA	NA	NA	NA	Bunyavirales	NA	NA	NA	Ellioviricetes	Polyploviricotina	Negarnaviricota	NA
107	Phenuiviridae	Cluster13438	1	MVJL01006553.1:76581-82671(-):Macrocentrus_cingulum	Macrocentrus_cingulum	MVJL01006553.1_76581-82671_-__Macrocentrus_cingulum	MVJL01006553.1:Macrocentrus_cingulum	NA	NA	NA	NA	NA	NA	APG79318	NA	61977	MVJL01006553.1:Macrocentrus_cingulum	NA	8	35	2044	1297	0	20	2015	105	2148	0	1155	2173	1923419	Riboviria	Shahe_heteroptera_virus_3	NA	Bunya-Arena	Phenuiviridae	Viruses	NA	NA	NA	NA	NA	NA	NA	NA	NA	NA	NA	NA
107	Phenuiviridae	Cluster13438	1	MVJL01011931.1:4267-10360(+):Macrocentrus_cingulum	Macrocentrus_cingulum	MVJL01011931.1_4267-10360_+__Macrocentrus_cingulum	MVJL01011931.1:Macrocentrus_cingulum	NA	NA	NA	NA	NA	NA	APG79318	NA	62369	MVJL01011931.1:Macrocentrus_cingulum	NA	2	37	1962	1189	0	99	1987	156	2117	0	1202	2173	1923419	Riboviria	Shahe_heteroptera_virus_3	NA	Bunya-Arena	Phenuiviridae	Viruses	NA	NA	NA	NA	NA	NA	NA	NA	NA	NA	NA	NA
246	Phenuiviridae	Cluster13438	2	scaffold_3:39461-45158(-):Aphidius_colemani	Aphidius_colemani	scaffold_3_39461-45158_-__Aphidius_colemani	scaffold_3:Aphidius_colemani	NA	NA	NA	21	45.1521	45.1521	YP_009293590	NA	91736	scaffold_3:Aphidius_colemani	NA	12	30	1432	1000	0	357	1785	407	1838	2.208e-186	641	2121	1608048	Riboviria	Huangpi_Tick_Virus_2	Phlebovirus	Phenuiviridae	Phenuiviridae	Viruses	NA	NA	NA	NA	Bunyavirales	NA	NA	NA	Ellioviricetes	Polyploviricotina	Negarnaviricota	NA
246	Phenuiviridae	Cluster13438	2	scaffold_647:25556-31457(+):Aphidius_colemani	Aphidius_colemani	scaffold_647_25556-31457_+__Aphidius_colemani	scaffold_647:Aphidius_colemani	NA	NA	NA	81	168.138	168.138	YP_009551639	NA	91910	scaffold_647:Aphidius_colemani	NA	4	25.9	1777	1316	0	31	1807	21	1797	1.52e-178	618	2121	1564120	Riboviria	Kaisodi_virus	Phlebovirus	Phenuiviridae	Phenuiviridae	Viruses	NA	NA	NA	NA	Bunyavirales	NA	NA	NA	Ellioviricetes	Polyploviricotina	Negarnaviricota	NA
165	Peribunyaviridae	Cluster13442	1	scaffold_16308:1940-2570(-):Platygaster_orseoliae	Platygaster_orseoliae	scaffold_16308_1940-2570_-__Platygaster_orseoliae	scaffold_16308:Platygaster_orseoliae	NA	NA	NA	NA	NA	NA	YP_009507853	NA	173118	scaffold_16308:Platygaster_orseoliae	NA	0	46.6	208	110	0	4	210	5	212	1.497e-49	179	226	1230253	Riboviria	Herbert_herbevirus	Herbevirus	Peribunyaviridae	Peribunyaviridae	Viruses	NA	NA	NA	NA	Bunyavirales	NA	NA	NA	Ellioviricetes	Polyploviricotina	Negarnaviricota	NA
217	Reoviridae	Cluster13533	1	UXGD01002336.1:485-701(-):Torymus_auratus	Torymus_auratus	UXGD01002336.1_485-701_-__Torymus_auratus	UXGD01002336.1:Torymus_auratus	NA	NA	NA	NA	NA	NA	AAQ83572	NA	50737	UXGD01002336.1:Torymus_auratus	NA	1	40.4	70	41	0	1	70	16	85	3.262e-08	52	198	246280	Riboviria	Liao_ning_virus	Seadornavirus	Reoviridae	Reoviridae	Viruses	Sedoreovirinae	NA	NA	NA	NA	NA	NA	NA	NA	NA	NA	NA
368	Reoviridae	Cluster13533	2	GL277373.1:560571-560787(+):Nasonia_giraulti	Nasonia_giraulti	GL277373.1_560571-560787_+__Nasonia_giraulti	GL277373.1:Nasonia_giraulti	30	NA	NA	739	53825.9	53825.9	AAQ83572	NA	3512	GL277373.1:Nasonia_giraulti	30	150	41.4	72	42	0	1	72	18	89	2.55e-09	55	198	246280	Riboviria	Liao_ning_virus	Seadornavirus	Reoviridae	Reoviridae	Viruses	Sedoreovirinae	NA	NA	NA	NA	NA	NA	NA	NA	NA	NA	NA
368	Reoviridae	Cluster13533	2	GL277989.1:560302-560518(+):Nasonia_longicornis	Nasonia_longicornis	GL277989.1_560302-560518_+__Nasonia_longicornis	GL277989.1:Nasonia_longicornis	27	NA	NA	NA	NA	NA	AAQ83572	NA	3755	GL277989.1:Nasonia_longicornis	27	145	41.9	72	41	0	1	72	18	89	1.349e-09	56	198	246280	Riboviria	Liao_ning_virus	Seadornavirus	Reoviridae	Reoviridae	Viruses	Sedoreovirinae	NA	NA	NA	NA	NA	NA	NA	NA	NA	NA	NA
368	Reoviridae	Cluster13533	2	NNAY01001014.1:30929-31106(+):Trichomalopsis_sarcophagae	Trichomalopsis_sarcophagae	NNAY01001014.1_30929-31106_+__Trichomalopsis_sarcophagae	NNAY01001014.1:Trichomalopsis_sarcophagae	NA	NA	NA	244	64964.5	64964.5	AAQ83572	NA	15178	NNAY01001014.1:Trichomalopsis_sarcophagae	NA	5	44.5	59	32	0	1	59	18	76	8.68e-08	50	198	246280	Riboviria	Liao_ning_virus	Seadornavirus	Reoviridae	Reoviridae	Viruses	Sedoreovirinae	NA	NA	NA	NA	NA	NA	NA	NA	NA	NA	NA
368	Reoviridae	Cluster13533	2	NW_001818015.1_0:561145-561361(+):Nasonia_vitripennis	Nasonia_vitripennis	NW_001818015.1_0_561145-561361_+__Nasonia_vitripennis	NW_001818015.1_0:Nasonia_vitripennis	18	NA	NA	1334	56193.4	56193.4	AAQ83572	NA	17229	NW_001818015.1_0:Nasonia_vitripennis	18	66	41.2	72	42	0	1	72	18	89	3.507e-09	55	198	246280	Riboviria	Liao_ning_virus	Seadornavirus	Reoviridae	Reoviridae	Viruses	Sedoreovirinae	NA	NA	NA	NA	NA	NA	NA	NA	NA	NA	NA
3	Unclassified_ssRNA	Cluster13782	1	scaffold_23944:315-549(+):Eretmocerus_eremicus	Eretmocerus_eremicus	scaffold_23944_315-549_+__Eretmocerus_eremicus	scaffold_23944:Eretmocerus_eremicus	NA	NA	NA	NA	NA	NA	YP_009179382	NA	166594	scaffold_23944:Eretmocerus_eremicus	NA	0	40.1	81	46	0	1	78	1	81	1.392e-10	59	260	1746067	Riboviria	Wuhan_aphid_virus_1	NA	Unknown	Unclassified ssRNA	Viruses	NA	NA	NA	NA	NA	NA	NA	NA	NA	NA	NA	NA
9	Unclassified_ssRNA	Cluster13782	2	scaffold_17066:4388-4910(-):Eretmocerus_eremicus	Eretmocerus_eremicus	scaffold_17066_4388-4910_-__Eretmocerus_eremicus	scaffold_17066:Eretmocerus_eremicus	NA	NA	NA	NA	NA	NA	YP_009179398	NA	82654	scaffold_17066:Eretmocerus_eremicus	NA	1	37	175	109	0	1	174	79	253	1.053e-26	111	254	1746071	Riboviria	Wuhan_flea_virus	NA	Unknown	Unclassified ssRNA	Viruses	NA	NA	NA	NA	NA	NA	NA	NA	NA	NA	NA	NA
312	Unclassified_ssRNA	Cluster13782	3	scaffold_1259:4011-4686(+):Copidosoma_sp	Copidosoma_sp	scaffold_1259_4011-4686_+__Copidosoma_sp	scaffold_1259:Copidosoma_sp	2	NA	NA	NA	NA	NA	YP_009179394	NA	84061	scaffold_1259:Copidosoma_sp	2	4	33.2	193	128	0	16	208	27	218	8.849e-24	104	256	1746063	Riboviria	Shuangao_insect_virus_7	NA	Unknown	Unclassified ssRNA	Viruses	NA	NA	NA	NA	NA	NA	NA	NA	NA	NA	NA	NA
312	Unclassified_ssRNA	Cluster8607	1	scaffold_1259:5161-5848(+):Copidosoma_sp	Copidosoma_sp	scaffold_1259_5161-5848_+__Copidosoma_sp	scaffold_1259:Copidosoma_sp	2	NA	NA	NA	NA	NA	YP_009179395	NA	84065	scaffold_1259:Copidosoma_sp	2	4	26.4	213	155	0	10	222	155	365	1.419e-15	80	528	1746063	Riboviria	Shuangao_insect_virus_7	NA	Unknown	Unclassified ssRNA	Viruses	NA	NA	NA	NA	NA	NA	NA	NA	NA	NA	NA	NA
228	Unclassified_ssRNA	Cluster13782	4	scaffold_6981:2846-3452(-):Trichogramma_brassicae	Trichogramma_brassicae	scaffold_6981_2846-3452_-__Trichogramma_brassicae	scaffold_6981:Trichogramma_brassicae	NA	NA	NA	NA	NA	NA	YP_009179394	NA	48620	scaffold_6981:Trichogramma_brassicae	NA	1	32.4	164	106	0	37	200	24	181	6.806e-18	86	256	1746063	Riboviria	Shuangao_insect_virus_7	NA	Unknown	Unclassified ssRNA	Viruses	NA	NA	NA	NA	NA	NA	NA	NA	NA	NA	NA	NA
334	Unclassified_ssRNA	Cluster13782	5	scaffold_17089:2275-3046(-):Encarsia_formosa	Encarsia_formosa	scaffold_17089_2275-3046_-__Encarsia_formosa	scaffold_17089:Encarsia_formosa	NA	NA	NA	113	15843	15843	YP_009179394	NA	166583	scaffold_17089:Encarsia_formosa	NA	0	37.1	229	143	0	29	257	27	255	4.282e-37	145	256	1746063	Riboviria	Shuangao_insect_virus_7	NA	Unknown	Unclassified ssRNA	Viruses	NA	NA	NA	NA	NA	NA	NA	NA	NA	NA	NA	NA
334	Unclassified_ssRNA	Cluster8607	2	scaffold_17089:614-2063(-):Encarsia_formosa	Encarsia_formosa	scaffold_17089_614-2063_-__Encarsia_formosa	scaffold_17089:Encarsia_formosa	NA	NA	NA	63	4702.72	4702.72	YP_009179399	NA	166588	scaffold_17089:Encarsia_formosa	NA	0	27.9	475	340	0	3	475	42	516	4.478e-50	191	526	1746071	Riboviria	Wuhan_flea_virus	NA	Unknown	Unclassified ssRNA	Viruses	NA	NA	NA	NA	NA	NA	NA	NA	NA	NA	NA	NA
160	Partiti-Picobirna	Cluster14344	1	scaffold_29299_0:371-1034(-):Platygaster_equestris	Platygaster_equestris	scaffold_29299_0_371-1034_-__Platygaster_equestris	scaffold_29299_0:Platygaster_equestris	1	NA	NA	NA	NA	NA	YP_009337887	NA	54970	scaffold_29299_0:Platygaster_equestris	1	1	30.9	221	147	0	1	221	196	409	8.906e-25	107	438	1923250	Riboviria	Hubei_tetragnatha_maxillosa_virus_8	NA	Partiti-Picobirna	Partiti-Picobirna	Viruses	NA	NA	NA	NA	NA	NA	NA	NA	NA	NA	NA	NA
322	Partiti-Picobirna	Cluster14344	2	KQ977637.1:17854-18648(+):Cyphomyrmex_costatus	Cyphomyrmex_costatus	KQ977637.1_17854-18648_+__Cyphomyrmex_costatus	KQ977637.1:Cyphomyrmex_costatus	38	NA	NA	0	0	0	YP_009337887	NA	10734	KQ977637.1:Cyphomyrmex_costatus	38	21	28.8	137	93	0	1	137	192	323	6.598e-09	61	438	1923250	Riboviria	Hubei_tetragnatha_maxillosa_virus_8	NA	Partiti-Picobirna	Partiti-Picobirna	Viruses	NA	NA	NA	NA	NA	NA	NA	NA	NA	NA	NA	NA
137	Partiti-Picobirna	Cluster14344	3	CM009917.1_8:405351-405717(+):Neodiprion_lecontei	Neodiprion_lecontei	CM009917.1_8_405351-405717_+__Neodiprion_lecontei	CM009917.1_8:Neodiprion_lecontei	34	NA	NA	NA	NA	NA	YP_009337887	NA	2023	CM009917.1_8:Neodiprion_lecontei	34	84	39	122	74	0	1	122	251	372	1.975e-18	84	438	1923250	Riboviria	Hubei_tetragnatha_maxillosa_virus_8	NA	Partiti-Picobirna	Partiti-Picobirna	Viruses	NA	NA	NA	NA	NA	NA	NA	NA	NA	NA	NA	NA
137	Partiti-Picobirna	Cluster14344	3	SSWZ01000339.1:125945-126464(-):Neodiprion_pinetum	Neodiprion_pinetum	SSWZ01000339.1_125945-126464_-__Neodiprion_pinetum	SSWZ01000339.1:Neodiprion_pinetum	46	NA	NA	NA	NA	NA	YP_009337887	NA	40835	SSWZ01000339.1:Neodiprion_pinetum	46	19	33.6	144	95	0	30	173	217	360	2.929e-16	80	438	1923250	Riboviria	Hubei_tetragnatha_maxillosa_virus_8	NA	Partiti-Picobirna	Partiti-Picobirna	Viruses	NA	NA	NA	NA	NA	NA	NA	NA	NA	NA	NA	NA
198	Poxviridae	Cluster14552	93	QKQZ01029049.1:1740-2202(+):Solenopsis_fugax	Solenopsis_fugax	QKQZ01029049.1_1740-2202_+__Solenopsis_fugax	QKQZ01029049.1:Solenopsis_fugax	1	NA	NA	NA	NA	NA	YP_784344	NA	171511	QKQZ01029049.1:Solenopsis_fugax	1	0	27.9	133	95	0	1	133	12	144	2.038e-08	57	249	1285600	NA	Nile_crocodilepox_virus	Crocodylidpoxvirus	Poxviridae	Poxviridae	Viruses	Chordopoxvirinae	NA	NA	NA	NA	NA	NA	NA	NA	NA	NA	NA
164	Nudiviridae	Cluster14604	1	scaffold_8390:1207-1837(-):Platygaster_equestris	Platygaster_equestris	scaffold_8390_1207-1837_-__Platygaster_equestris	scaffold_8390:Platygaster_equestris	NA	NA	NA	NA	NA	NA	ABO45407	NA	169207	scaffold_8390:Platygaster_equestris	NA	0	30.5	208	142	0	3	210	7	212	4.274e-22	99	235	432587	NA	Gryllus_bimaculatus_nudivirus	Alphanudivirus	Nudiviridae	Nudiviridae	Viruses	NA	NA	NA	NA	NA	NA	NA	NA	NA	NA	NA	NA
164	Nudiviridae	Cluster23903	3	scaffold_8390:4815-5181(-):Platygaster_equestris	Platygaster_equestris	scaffold_8390_4815-5181_-__Platygaster_equestris	scaffold_8390:Platygaster_equestris	NA	NA	NA	NA	NA	NA	YP_009553428	NA	169211	scaffold_8390:Platygaster_equestris	NA	0	33.2	116	73	0	1	116	102	212	1.384e-11	64	237	2053981	unclassified_Nudiviridae	Tomelloso_virus	NA	Nudiviridae	Nudiviridae	Viruses	NA	NA	NA	NA	NA	NA	NA	NA	NA	NA	NA	NA
164	Nudiviridae	Cluster5853	1	scaffold_8390:327-1041(+):Platygaster_equestris	Platygaster_equestris	scaffold_8390_327-1041_+__Platygaster_equestris	scaffold_8390:Platygaster_equestris	NA	NA	NA	NA	NA	NA	YP_009553387	NA	169194	scaffold_8390:Platygaster_equestris	NA	0	28.3	236	161	0	1	236	1	226	7.207e-22	99	226	2053981	unclassified_Nudiviridae	Tomelloso_virus	NA	Nudiviridae	Nudiviridae	Viruses	NA	NA	NA	NA	NA	NA	NA	NA	NA	NA	NA	NA
164	Nudiviridae	Cluster9642	2	scaffold_8390:1905-2481(-):Platygaster_equestris	Platygaster_equestris	scaffold_8390_1905-2481_-__Platygaster_equestris	scaffold_8390:Platygaster_equestris	NA	NA	NA	NA	NA	NA	YP_009551760	NA	169200	scaffold_8390:Platygaster_equestris	NA	0	35.4	192	118	0	1	192	5	188	1.665e-27	114	192	2072209	unclassified_Nudiviridae	Esparto_virus	NA	Nudiviridae	Nudiviridae	Viruses	NA	NA	NA	NA	NA	NA	NA	NA	NA	NA	NA	NA
23	Nudiviridae	Cluster15164	1	UXGC01002022.1:7205-7787(+):Eurytoma_adleriae	Eurytoma_adleriae	UXGC01002022.1_7205-7787_+__Eurytoma_adleriae	UXGC01002022.1:Eurytoma_adleriae	NA	NA	NA	NA	NA	NA	AJZ73131.1_CP_Burke-fopius	NA	78361	UXGC01002022.1:Eurytoma_adleriae	NA	3	42.8	163	86	0	32	194	24	174	1.089e-31	126	631	32260	cellular_organisms	Venturia_canescens	Venturia	Nudiviridae	Nudiviridae	Eukaryota	Campopleginae	Ichneumonoidea	Parasitoida	Apocrita	Hymenoptera	Holometabola	Neoptera	Pterygota	Insecta	Hexapoda	Arthropoda	Metazoa
23	Nudiviridae	Cluster3614	21	UXGC01013876.1:1479-2394(+):Eurytoma_adleriae	Eurytoma_adleriae	UXGC01013876.1_1479-2394_+__Eurytoma_adleriae	UXGC01013876.1:Eurytoma_adleriae	3	NA	NA	NA	NA	NA	AHW98293.1_CP_Burke-fopius	NA	43057	UXGC01013876.1:Eurytoma_adleriae	3	1	32.4	262	174	0	36	297	38	296	3.215e-33	135	493	1487700	unclassified_Nudiviridae	Nilaparvata_lugens_endogenous_nudivirus	NA	Nudiviridae	Nudiviridae	Viruses	NA	NA	NA	NA	NA	NA	NA	NA	NA	NA	NA	NA
1	Parvoviridae	Cluster15201	1	NW_011626892.1_2_2-HSPs_-__Acromyrmex_echinatior	Acromyrmex_echinatior	NW_011626892.1_2_2-HSPs_-__Acromyrmex_echinatior	NW_011626892.1_2:Acromyrmex_echinatior	32	NA	NA	NA	NA	NA	AAM28943	NA	17426	NW_011626892.1_2:Acromyrmex_echinatior	32	37	56	202	88	0	1	201	526	727	3.955e-63	218	793	194675	Aedes_albopictus_densovirus_3	Dipteran_brevidensovirus_2	Brevidensovirus	Parvoviridae	Parvoviridae	Viruses	Densovirinae	NA	NA	NA	NA	NA	NA	NA	NA	NA	NA	NA
1	Parvoviridae	Cluster15201	1	NW_011626892.1_2:241395-242061(-):Acromyrmex_echinatior	Acromyrmex_echinatior	NW_011626892.1_2_241395-242061_-__Acromyrmex_echinatior	NW_011626892.1_2:Acromyrmex_echinatior	32	NA	NA	NA	NA	NA	AAM28943	NA	17426	NW_011626892.1_2:Acromyrmex_echinatior	32	37	56	202	88	0	1	201	526	727	3.955e-63	218	793	194675	Aedes_albopictus_densovirus_3	Dipteran_brevidensovirus_2	Brevidensovirus	Parvoviridae	Parvoviridae	Viruses	Densovirinae	NA	NA	NA	NA	NA	NA	NA	NA	NA	NA	NA
1	Parvoviridae	Cluster15201	1	NW_011626892.1_2:242109-242760(-):Acromyrmex_echinatior	Acromyrmex_echinatior	NW_011626892.1_2_242109-242760_-__Acromyrmex_echinatior	NW_011626892.1_2:Acromyrmex_echinatior	32	NA	NA	NA	NA	NA	YP_002265406	NA	17388	NW_011626892.1_2:Acromyrmex_echinatior	32	37	34.8	217	136	0	1	210	280	496	4.676e-31	125	791	487311	Anopheles_gambiae_densovirus	Dipteran_brevidensovirus_1	Brevidensovirus	Parvoviridae	Parvoviridae	Viruses	Densovirinae	NA	NA	NA	NA	NA	NA	NA	NA	NA	NA	NA
274	Phycodnaviridae	Cluster15309	1	scaffold_156:121395-121783(-):Campopleginae	Campopleginae	scaffold_156_121395-121783_-__Campopleginae	scaffold_156:Campopleginae	NA	NA	NA	NA	NA	NA	NP_048943	NA	87221	scaffold_156:Campopleginae	NA	17	30.6	111	69	0	1	111	1	101	3.305e-08	55	114	10506	NA	Paramecium_bursaria_Chlorella_virus_1	Chlorovirus	Phycodnaviridae	Phycodnaviridae	Viruses	NA	NA	NA	NA	NA	NA	NA	NA	NA	NA	NA	NA
18	Baculoviridae	Cluster15489	1	scaffold_464255:8-182(-):Eupelmus_kiefferi	Eupelmus_kiefferi	scaffold_464255_8-182_-__Eupelmus_kiefferi	scaffold_464255:Eupelmus_kiefferi	NA	NA	NA	NA	NA	NA	YP_025113	NA	173509	scaffold_464255:Eupelmus_kiefferi	NA	0	43	58	30	0	1	58	7	59	7.739e-07	48	113	111874	NA	Neodiprion_sertifer_nucleopolyhedrovirus	Gammabaculovirus	Baculoviridae	Baculoviridae	Viruses	NA	NA	NA	NA	NA	NA	NA	NA	NA	NA	NA	NA
190	Nimaviridae	Cluster15833	1	scaffold_2867_0:11488-11752(+):Aphidius_colemani	Aphidius_colemani	scaffold_2867_0_11488-11752_+__Aphidius_colemani	scaffold_2867_0:Aphidius_colemani	NA	NA	NA	49	2265.33	2265.33	ATU83744	NA	91512	scaffold_2867_0:Aphidius_colemani	NA	5	42.6	88	50	0	1	88	2	89	7.76e-14	69	89	342409	NA	White_spot_syndrome_virus	Whispovirus	Nimaviridae	Nimaviridae	Viruses	NA	NA	NA	NA	NA	NA	NA	NA	NA	NA	NA	NA
316	Nimaviridae	Cluster15833	2	scaffold_153:54194-54533(+):Cremastinae_A	Cremastinae_A	scaffold_153_54194-54533_+__Cremastinae_A	scaffold_153:Cremastinae_A	1	NA	NA	NA	NA	NA	ATU83744	NA	44377	scaffold_153:Cremastinae_A	1	20	35.2	113	56	0	1	113	2	89	5.742e-13	68	89	342409	NA	White_spot_syndrome_virus	Whispovirus	Nimaviridae	Nimaviridae	Viruses	NA	NA	NA	NA	NA	NA	NA	NA	NA	NA	NA	NA
369	Nimaviridae	Cluster15833	3	CM009921.1_5:1539718-1539865(-):Neodiprion_lecontei	Neodiprion_lecontei	CM009921.1_5_1539718-1539865_-__Neodiprion_lecontei	CM009921.1_5:Neodiprion_lecontei	6	NA	NA	NA	NA	NA	ATU83744	NA	2045	CM009921.1_5:Neodiprion_lecontei	6	145	59	49	20	0	1	49	1	49	4.662e-11	59	89	342409	NA	White_spot_syndrome_virus	Whispovirus	Nimaviridae	Nimaviridae	Viruses	NA	NA	NA	NA	NA	NA	NA	NA	NA	NA	NA	NA
369	Nimaviridae	Cluster15833	3	SSWZ01000123.1:59500-59647(-):Neodiprion_pinetum	Neodiprion_pinetum	SSWZ01000123.1_59500-59647_-__Neodiprion_pinetum	SSWZ01000123.1:Neodiprion_pinetum	7	NA	NA	NA	NA	NA	ATU83744	NA	40796	SSWZ01000123.1:Neodiprion_pinetum	7	52	59	49	20	0	1	49	1	49	4.662e-11	59	89	342409	NA	White_spot_syndrome_virus	Whispovirus	Nimaviridae	Nimaviridae	Viruses	NA	NA	NA	NA	NA	NA	NA	NA	NA	NA	NA	NA
142	Nimaviridae	Cluster15833	4	SGBU01000351.1:96373-96640(-):Nylanderia_fulva	Nylanderia_fulva	SGBU01000351.1_96373-96640_-__Nylanderia_fulva	SGBU01000351.1:Nylanderia_fulva	13	NA	NA	0	0	0	ATU83744	NA	58167	SGBU01000351.1:Nylanderia_fulva	13	26	42.4	89	51	0	1	89	1	89	5.907e-14	70	89	342409	NA	White_spot_syndrome_virus	Whispovirus	Nimaviridae	Nimaviridae	Viruses	NA	NA	NA	NA	NA	NA	NA	NA	NA	NA	NA	NA
142	Nimaviridae	Cluster15833	4	SGBU01000943.1:49734-50001(-):Nylanderia_fulva	Nylanderia_fulva	SGBU01000943.1_49734-50001_-__Nylanderia_fulva	SGBU01000943.1:Nylanderia_fulva	17	NA	NA	0	0	0	ATU83744	NA	39336	SGBU01000943.1:Nylanderia_fulva	17	2	42.4	89	51	0	1	89	1	89	5.907e-14	70	89	342409	NA	White_spot_syndrome_virus	Whispovirus	Nimaviridae	Nimaviridae	Viruses	NA	NA	NA	NA	NA	NA	NA	NA	NA	NA	NA	NA
278	Poxviridae	Cluster16096	1	SGAY01008821.1:1682-1979(+):Cataglyphis_hispanica	Cataglyphis_hispanica	SGAY01008821.1_1682-1979_+__Cataglyphis_hispanica	SGAY01008821.1:Cataglyphis_hispanica	NA	NA	NA	NA	NA	NA	YP_009666159	NA	169694	SGAY01008821.1:Cataglyphis_hispanica	NA	0	35.7	92	59	0	2	93	37	128	1.672e-09	57	213	109981	Diachasmimorpha_longicaudata_entomopoxvirus	Diachasmimorpha_entomopoxvirus	NA	Poxviridae	Poxviridae	Viruses	Entomopoxvirinae	NA	NA	NA	NA	NA	NA	NA	NA	NA	NA	NA
278	Poxviridae	Cluster16096	1	SGAY01011552.1:47-676(-):Cataglyphis_hispanica	Cataglyphis_hispanica	SGAY01011552.1_47-676_-__Cataglyphis_hispanica	SGAY01011552.1:Cataglyphis_hispanica	1	NA	NA	NA	NA	NA	YP_009001665	NA	86434	SGAY01011552.1:Cataglyphis_hispanica	1	1	36.5	113	69	0	2	114	7	116	7.235e-13	72	222	62099	NA	Anomala_cuprea_entomopoxvirus	Alphaentomopoxvirus	Poxviridae	Poxviridae	Viruses	Entomopoxvirinae	NA	NA	NA	NA	NA	NA	NA	NA	NA	NA	NA
132	Nudiviridae	Cluster16867	1	CM009919.1_2_2-HSPs_-__Neodiprion_lecontei	Neodiprion_lecontei	CM009919.1_2_2-HSPs_-__Neodiprion_lecontei	CM009919.1_2:Neodiprion_lecontei	47	NA	NA	NA	NA	NA	ADI40491.1_CP_Pichon-venturia	NA	2035	CM009919.1_2:Neodiprion_lecontei	47	36	37.8	123	72	0	1	117	357	479	1.467e-17	81	492	260305	cellular_organisms	Hyposoter_didymator	Hyposoter	Nudiviridae	Nudiviridae	Eukaryota	Campopleginae	Ichneumonoidea	Parasitoida	Apocrita	Hymenoptera	Holometabola	Neoptera	Pterygota	Insecta	Hexapoda	Arthropoda	Metazoa
268	IVSPERs	Cluster16867	12	KZ625021.1_2:614985-616080(-):Athalia_rosae	Athalia_rosae	KZ625021.1_2_614985-616080_-__Athalia_rosae	KZ625021.1_2:Athalia_rosae	11	NA	NA	NA	NA	NA	ADI40491.1_CP_Volkoff-hyposoter	NA	10969	KZ625021.1_2:Athalia_rosae	11	103	32.9	394	244	0	1	365	98	491	1.843e-56	206	492	260305	cellular_organisms	Hyposoter_didymator	Hyposoter	IVSPERs	IVSPERs	Eukaryota	Campopleginae	Ichneumonoidea	Parasitoida	Apocrita	Hymenoptera	Holometabola	Neoptera	Pterygota	Insecta	Hexapoda	Arthropoda	Metazoa
370	Nudiviridae	Cluster16867	14	CM009916.1_13:878767-879412(-):Neodiprion_lecontei	Neodiprion_lecontei	CM009916.1_13_878767-879412_-__Neodiprion_lecontei	CM009916.1_13:Neodiprion_lecontei	14	NA	NA	NA	NA	NA	ADI40491.1_CP_Pichon-venturia	NA	1372	CM009916.1_13:Neodiprion_lecontei	14	169	43.2	215	122	0	1	215	263	477	2.264e-45	167	492	260305	cellular_organisms	Hyposoter_didymator	Hyposoter	Nudiviridae	Nudiviridae	Eukaryota	Campopleginae	Ichneumonoidea	Parasitoida	Apocrita	Hymenoptera	Holometabola	Neoptera	Pterygota	Insecta	Hexapoda	Arthropoda	Metazoa
370	Nudiviridae	Cluster16867	14	SSWZ01000072.1:367651-368296(+):Neodiprion_pinetum	Neodiprion_pinetum	SSWZ01000072.1_367651-368296_+__Neodiprion_pinetum	SSWZ01000072.1:Neodiprion_pinetum	2	NA	NA	NA	NA	NA	ADI40491.1_CP_Volkoff-hyposoter	NA	40726	SSWZ01000072.1:Neodiprion_pinetum	2	14	42.9	215	122	0	1	215	263	477	5.806e-45	166	492	260305	cellular_organisms	Hyposoter_didymator	Hyposoter	IVSPERs	IVSPERs	Eukaryota	Campopleginae	Ichneumonoidea	Parasitoida	Apocrita	Hymenoptera	Holometabola	Neoptera	Pterygota	Insecta	Hexapoda	Arthropoda	Metazoa
370	Nudiviridae	Cluster3513	14	CM009917.1_8:406361-406853(+):Neodiprion_lecontei	Neodiprion_lecontei	CM009917.1_8_406361-406853_+__Neodiprion_lecontei	CM009917.1_8:Neodiprion_lecontei	34	NA	NA	NA	NA	NA	BAF45626.1_CP_Pichon-venturia	NA	2020	CM009917.1_8:Neodiprion_lecontei	34	84	44	164	91	0	1	164	51	214	5.667e-34	131	237	74492	unclassified_Ichnovirus	Tranosema_rostrale_ichnovirus	Ichnovirus	Nudiviridae	Nudiviridae	Viruses	NA	NA	NA	NA	NA	NA	NA	NA	NA	NA	NA	NA
370	Nudiviridae	Cluster3513	14	CM009919.1_2:186963-187518(+):Neodiprion_lecontei	Neodiprion_lecontei	CM009919.1_2_186963-187518_+__Neodiprion_lecontei	CM009919.1_2:Neodiprion_lecontei	47	NA	NA	NA	NA	NA	BAF45627.1_CP_Pichon-venturia	NA	2026	CM009919.1_2:Neodiprion_lecontei	47	36	44.2	186	103	0	1	185	2	187	6.898e-40	149	233	74492	unclassified_Ichnovirus	Tranosema_rostrale_ichnovirus	Ichnovirus	Nudiviridae	Nudiviridae	Viruses	NA	NA	NA	NA	NA	NA	NA	NA	NA	NA	NA	NA
370	Nudiviridae	Cluster3513	14	LGIB01000648.1_2-HSPs_+__Neodiprion_lecontei	Neodiprion_lecontei	LGIB01000648.1_2-HSPs_+__Neodiprion_lecontei	LGIB01000648.1:Neodiprion_lecontei	NA	NA	NA	NA	NA	NA	BAF45626.1_CP_Pichon-venturia	NA	11376	LGIB01000648.1:Neodiprion_lecontei	NA	7	49.1	91	45	0	4	93	114	204	2.193e-19	85	237	74492	unclassified_Ichnovirus	Tranosema_rostrale_ichnovirus	Ichnovirus	Nudiviridae	Nudiviridae	Viruses	NA	NA	NA	NA	NA	NA	NA	NA	NA	NA	NA	NA
370	Nudiviridae	Cluster3513	14	LGIB01004247.1:685-1177(+):Neodiprion_lecontei	Neodiprion_lecontei	LGIB01004247.1_685-1177_+__Neodiprion_lecontei	LGIB01004247.1:Neodiprion_lecontei	1	NA	NA	NA	NA	NA	BAF45626.1_CP_Pichon-venturia	NA	111230	LGIB01004247.1:Neodiprion_lecontei	1	0	43.9	164	91	0	1	164	51	214	7.764e-34	131	237	74492	unclassified_Ichnovirus	Tranosema_rostrale_ichnovirus	Ichnovirus	Nudiviridae	Nudiviridae	Viruses	NA	NA	NA	NA	NA	NA	NA	NA	NA	NA	NA	NA
370	Nudiviridae	Cluster3513	14	SSWZ01000038.1:856306-856753(-):Neodiprion_pinetum	Neodiprion_pinetum	SSWZ01000038.1_856306-856753_-__Neodiprion_pinetum	SSWZ01000038.1:Neodiprion_pinetum	112	NA	NA	NA	NA	NA	BAF45627.1_CP_Pichon-venturia	NA	40409	SSWZ01000038.1:Neodiprion_pinetum	112	70	43.7	149	83	0	1	149	2	150	7.291e-30	119	233	74492	unclassified_Ichnovirus	Tranosema_rostrale_ichnovirus	Ichnovirus	Nudiviridae	Nudiviridae	Viruses	NA	NA	NA	NA	NA	NA	NA	NA	NA	NA	NA	NA
370	Nudiviridae	Cluster3513	14	SSWZ01000153.1_2-HSPs_+__Neodiprion_pinetum	Neodiprion_pinetum	SSWZ01000153.1_2-HSPs_+__Neodiprion_pinetum	SSWZ01000153.1:Neodiprion_pinetum	7	NA	NA	NA	NA	NA	BAF45626.1_CP_Pichon-venturia	NA	40804	SSWZ01000153.1:Neodiprion_pinetum	7	23	49.8	91	45	0	4	93	114	204	6.172e-20	87	237	74492	unclassified_Ichnovirus	Tranosema_rostrale_ichnovirus	Ichnovirus	Nudiviridae	Nudiviridae	Viruses	NA	NA	NA	NA	NA	NA	NA	NA	NA	NA	NA	NA
370	Nudiviridae	Cluster3513	14	SSWZ01000363.1:234223-234694(-):Neodiprion_pinetum	Neodiprion_pinetum	SSWZ01000363.1_234223-234694_-__Neodiprion_pinetum	SSWZ01000363.1:Neodiprion_pinetum	18	NA	NA	NA	NA	NA	BAF45626.1_CP_Pichon-venturia	NA	40898	SSWZ01000363.1:Neodiprion_pinetum	18	12	47.9	149	77	0	9	157	66	214	6.414e-35	134	237	74492	unclassified_Ichnovirus	Tranosema_rostrale_ichnovirus	Ichnovirus	Nudiviridae	Nudiviridae	Viruses	NA	NA	NA	NA	NA	NA	NA	NA	NA	NA	NA	NA
370	Nudiviridae	Cluster3513	14	SSWZ01000376.1:70115-70796(-):Neodiprion_pinetum	Neodiprion_pinetum	SSWZ01000376.1_70115-70796_-__Neodiprion_pinetum	SSWZ01000376.1:Neodiprion_pinetum	102	NA	NA	NA	NA	NA	BAF45626.1_CP_Pichon-venturia	NA	40903	SSWZ01000376.1:Neodiprion_pinetum	102	30	45.9	189	101	0	16	202	16	204	1.394e-42	159	237	74492	unclassified_Ichnovirus	Tranosema_rostrale_ichnovirus	Ichnovirus	Nudiviridae	Nudiviridae	Viruses	NA	NA	NA	NA	NA	NA	NA	NA	NA	NA	NA	NA
60	Chuviridae	Cluster16868	1	LBMM01010770.1:1018-1509(-):Lasius_niger	Lasius_niger	LBMM01010770.1_1018-1509_-__Lasius_niger	LBMM01010770.1:Lasius_niger	3	NA	NA	34	3892.7	3892.7	YP_009337906	Chuviridae	11214	LBMM01010770.1:Lasius_niger	3	1	58.3	134	55	0	1	134	136	269	1.187e-41	153	432	1922857	Riboviria	Hubei_chuvirus-like_virus_1	NA	Chuviridae	Chuviridae	Viruses	NA	NA	NA	NA	NA	NA	NA	NA	NA	NA	NA	NA
60	Chuviridae	Cluster16868	1	NW_014327380.1_1_2-HSPs_+__Copidosoma_floridanum	Copidosoma_floridanum	NW_014327380.1_1_2-HSPs_+__Copidosoma_floridanum	NW_014327380.1_1:Copidosoma_floridanum	5	NA	NA	NA	NA	NA	YP_009337091	Chuviridae	19996	NW_014327380.1_1:Copidosoma_floridanum	5	53	36.5	145	91	0	55	198	147	291	1.461e-19	91	396	1922858	Riboviria	Hubei_chuvirus-like_virus_3	NA	Chuviridae	Chuviridae	Viruses	NA	NA	NA	NA	NA	NA	NA	NA	NA	NA	NA	NA
60	Chuviridae	Cluster16868	14	LBMM01008154.1:1126-1291(-):Lasius_niger	Lasius_niger	LBMM01008154.1_1126-1291_-__Lasius_niger	LBMM01008154.1:Lasius_niger	NA	NA	NA	15	5090.03	5090.03	YP_009254003	Chuviridae	11182	LBMM01008154.1:Lasius_niger	NA	0	63.1	41	15	0	3	43	12	52	4.017e-09	54	111	1844927	unclassified_viruses	Lonestar_tick_chuvirus_1	NA	Chuviridae	Chuviridae	Viruses	NA	NA	NA	NA	NA	NA	NA	NA	NA	NA	NA	NA
60	Chuviridae	Cluster16868	7	LBMM01006287.1:3218-3575(-):Lasius_niger	Lasius_niger	LBMM01006287.1_3218-3575_-__Lasius_niger	LBMM01006287.1:Lasius_niger	4	NA	NA	24	3776.29	3776.29	YP_009337906	Chuviridae	11158	LBMM01006287.1:Lasius_niger	4	2	55.7	122	52	0	1	119	19	140	3.158e-35	132	432	1922857	Riboviria	Hubei_chuvirus-like_virus_1	NA	Chuviridae	Chuviridae	Viruses	NA	NA	NA	NA	NA	NA	NA	NA	NA	NA	NA	NA
146	Chuviridae	Cluster16868	10	NJRM01000830.1:54456-55464(-):Aphaenogaster_picea	Aphaenogaster_picea	NJRM01000830.1_54456-55464_-__Aphaenogaster_picea	NJRM01000830.1:Aphaenogaster_picea	5	NA	NA	NA	NA	NA	YP_009337906	Chuviridae	13504	NJRM01000830.1:Aphaenogaster_picea	5	5	54.2	329	150	0	2	329	96	424	5.71000000000001e-103	340	432	1922857	Riboviria	Hubei_chuvirus-like_virus_1	NA	Chuviridae	Chuviridae	Viruses	NA	NA	NA	NA	NA	NA	NA	NA	NA	NA	NA	NA
146	Chuviridae	Cluster16868	22	NJRL01002087.1:23079-23904(-):Aphaenogaster_rudis	Aphaenogaster_rudis	NJRL01002087.1_23079-23904_-__Aphaenogaster_rudis	NJRL01002087.1:Aphaenogaster_rudis	6	NA	NA	NA	NA	NA	YP_009337906	Chuviridae	13382	NJRL01002087.1:Aphaenogaster_rudis	6	3	53	270	126	0	6	275	37	306	1.825e-80	271	432	1922857	Riboviria	Hubei_chuvirus-like_virus_1	NA	Chuviridae	Chuviridae	Viruses	NA	NA	NA	NA	NA	NA	NA	NA	NA	NA	NA	NA
146	Chuviridae	Cluster16868	22	NJRM01001050.1:56438-57263(-):Aphaenogaster_picea	Aphaenogaster_picea	NJRM01001050.1_56438-57263_-__Aphaenogaster_picea	NJRM01001050.1:Aphaenogaster_picea	12	NA	NA	NA	NA	NA	YP_009337906	Chuviridae	92843	NJRM01001050.1:Aphaenogaster_picea	12	5	53	270	126	0	6	275	37	306	1.825e-80	271	432	1922857	Riboviria	Hubei_chuvirus-like_virus_1	NA	Chuviridae	Chuviridae	Viruses	NA	NA	NA	NA	NA	NA	NA	NA	NA	NA	NA	NA
57	Chuviridae	Cluster16868	11	NJRO01003282.1:1388-2213(-):Aphaenogaster_fulva	Aphaenogaster_fulva	NJRO01003282.1_1388-2213_-__Aphaenogaster_fulva	NJRO01003282.1:Aphaenogaster_fulva	4	NA	NA	NA	NA	NA	YP_009337906	Chuviridae	14457	NJRO01003282.1:Aphaenogaster_fulva	4	2	53.3	270	126	0	6	275	37	306	3.792e-81	273	432	1922857	Riboviria	Hubei_chuvirus-like_virus_1	NA	Chuviridae	Chuviridae	Viruses	NA	NA	NA	NA	NA	NA	NA	NA	NA	NA	NA	NA
57	Chuviridae	Cluster16868	13	NJRO01001646.1:30855-31692(+):Aphaenogaster_fulva	Aphaenogaster_fulva	NJRO01001646.1_30855-31692_+__Aphaenogaster_fulva	NJRO01001646.1:Aphaenogaster_fulva	5	NA	NA	NA	NA	NA	YP_009337906	Chuviridae	14429	NJRO01001646.1:Aphaenogaster_fulva	5	3	53.1	273	128	0	6	278	37	309	9.305e-82	275	432	1922857	Riboviria	Hubei_chuvirus-like_virus_1	NA	Chuviridae	Chuviridae	Viruses	NA	NA	NA	NA	NA	NA	NA	NA	NA	NA	NA	NA
57	Chuviridae	Cluster16868	9	NJRO01001063.1:31746-32712(+):Aphaenogaster_fulva	Aphaenogaster_fulva	NJRO01001063.1_31746-32712_+__Aphaenogaster_fulva	NJRO01001063.1:Aphaenogaster_fulva	7	NA	NA	NA	NA	NA	YP_009337906	Chuviridae	14217	NJRO01001063.1:Aphaenogaster_fulva	7	5	53.9	316	145	0	1	315	109	424	6.677e-98	324	432	1922857	Riboviria	Hubei_chuvirus-like_virus_1	NA	Chuviridae	Chuviridae	Viruses	NA	NA	NA	NA	NA	NA	NA	NA	NA	NA	NA	NA
273	Chuviridae	Cluster16868	12	NJRQ01000936.1:18826-19678(-):Aphaenogaster_ashmeadi	Aphaenogaster_ashmeadi	NJRQ01000936.1_18826-19678_-__Aphaenogaster_ashmeadi	NJRQ01000936.1:Aphaenogaster_ashmeadi	3	NA	NA	NA	NA	NA	YP_009337906	Chuviridae	15057	NJRQ01000936.1:Aphaenogaster_ashmeadi	3	3	53.5	278	129	0	6	283	37	314	2.924e-84	283	432	1922857	Riboviria	Hubei_chuvirus-like_virus_1	NA	Chuviridae	Chuviridae	Viruses	NA	NA	NA	NA	NA	NA	NA	NA	NA	NA	NA	NA
38	Chuviridae	Cluster16868	15	scaffold_9926:1184-1718(+):Ganaspis_ganaspis	Ganaspis_ganaspis	scaffold_9926_1184-1718_+__Ganaspis_ganaspis	scaffold_9926:Ganaspis_ganaspis	1	NA	NA	NA	NA	NA	YP_009337906	Chuviridae	164761	scaffold_9926:Ganaspis_ganaspis	1	0	45.1	172	89	0	1	163	260	431	2.046e-37	142	432	1922857	Riboviria	Hubei_chuvirus-like_virus_1	NA	Chuviridae	Chuviridae	Viruses	NA	NA	NA	NA	NA	NA	NA	NA	NA	NA	NA	NA
239	Chuviridae	Cluster16868	16	scaffold_5669:8053-9220(-):Trichopria_sp_970989	Trichopria_sp_970989	scaffold_5669_8053-9220_-__Trichopria_sp_970989	scaffold_5669:Trichopria_sp_970989	NA	NA	NA	NA	NA	NA	YP_009337906	Chuviridae	47887	scaffold_5669:Trichopria_sp_970989	NA	2	28.2	377	269	0	4	380	37	411	3.59e-39	156	432	1922857	Riboviria	Hubei_chuvirus-like_virus_1	NA	Chuviridae	Chuviridae	Viruses	NA	NA	NA	NA	NA	NA	NA	NA	NA	NA	NA	NA
287	Chuviridae	Cluster16868	17	KB465587.1_2:35974-37045(+):Cephus_cinctus	Cephus_cinctus	KB465587.1_2_35974-37045_+__Cephus_cinctus	KB465587.1_2:Cephus_cinctus	16	NA	NA	16	60.7644	60.7644	YP_009337906	Chuviridae	7808	KB465587.1_2:Cephus_cinctus	16	7	34.9	352	228	0	1	352	36	386	4.31e-55	201	432	1922857	Riboviria	Hubei_chuvirus-like_virus_1	NA	Chuviridae	Chuviridae	Viruses	NA	NA	NA	NA	NA	NA	NA	NA	NA	NA	NA	NA
337	Chuviridae	Cluster16868	18	scaffold_4901:9256-9691(-):Eretmocerus_eremicus	Eretmocerus_eremicus	scaffold_4901_9256-9691_-__Eretmocerus_eremicus	scaffold_4901:Eretmocerus_eremicus	4	NA	NA	NA	NA	NA	YP_009337906	Chuviridae	164447	scaffold_4901:Eretmocerus_eremicus	4	0	34.9	144	93	0	2	145	171	314	3.538e-18	85	432	1922857	Riboviria	Hubei_chuvirus-like_virus_1	NA	Chuviridae	Chuviridae	Viruses	NA	NA	NA	NA	NA	NA	NA	NA	NA	NA	NA	NA
337	Chuviridae	Cluster16868	19	scaffold_15070_0:4096-4648(+):Eretmocerus_eremicus	Eretmocerus_eremicus	scaffold_15070_0_4096-4648_+__Eretmocerus_eremicus	scaffold_15070_0:Eretmocerus_eremicus	1	NA	NA	NA	NA	NA	YP_009337906	Chuviridae	82632	scaffold_15070_0:Eretmocerus_eremicus	1	1	38.9	169	103	0	15	183	210	378	6.647e-28	115	432	1922857	Riboviria	Hubei_chuvirus-like_virus_1	NA	Chuviridae	Chuviridae	Viruses	NA	NA	NA	NA	NA	NA	NA	NA	NA	NA	NA	NA
337	Chuviridae	Cluster16868	20	scaffold_1529:12625-13117(+):Eretmocerus_eremicus	Eretmocerus_eremicus	scaffold_1529_12625-13117_+__Eretmocerus_eremicus	scaffold_1529:Eretmocerus_eremicus	NA	NA	NA	NA	NA	NA	YP_009337906	Chuviridae	164538	scaffold_1529:Eretmocerus_eremicus	NA	0	41.2	153	89	0	5	157	242	394	1.494e-27	113	432	1922857	Riboviria	Hubei_chuvirus-like_virus_1	NA	Chuviridae	Chuviridae	Viruses	NA	NA	NA	NA	NA	NA	NA	NA	NA	NA	NA	NA
337	Chuviridae	Cluster16868	21	scaffold_2331:7578-8271(+):Eretmocerus_eremicus	Eretmocerus_eremicus	scaffold_2331_7578-8271_+__Eretmocerus_eremicus	scaffold_2331:Eretmocerus_eremicus	1	NA	NA	NA	NA	NA	YP_009337906	Chuviridae	164743	scaffold_2331:Eretmocerus_eremicus	1	0	29	224	158	0	1	224	151	374	1.49e-21	98	432	1922857	Riboviria	Hubei_chuvirus-like_virus_1	NA	Chuviridae	Chuviridae	Viruses	NA	NA	NA	NA	NA	NA	NA	NA	NA	NA	NA	NA
256	Chuviridae	Cluster16868	2	DF939327.1:15485-16373(-):Vollenhovia_emeryi	Vollenhovia_emeryi	DF939327.1_15485-16373_-__Vollenhovia_emeryi	DF939327.1:Vollenhovia_emeryi	36	NA	NA	NA	NA	NA	YP_009337906	Chuviridae	2781	DF939327.1:Vollenhovia_emeryi	36	16	65.3	231	80	0	57	287	191	421	4.767e-90	300	432	1922857	Riboviria	Hubei_chuvirus-like_virus_1	NA	Chuviridae	Chuviridae	Viruses	NA	NA	NA	NA	NA	NA	NA	NA	NA	NA	NA	NA
179	Chuviridae	Cluster16868	8	NJRL01001042.1:49466-50474(+):Aphaenogaster_rudis	Aphaenogaster_rudis	NJRL01001042.1_49466-50474_+__Aphaenogaster_rudis	NJRL01001042.1:Aphaenogaster_rudis	9	NA	NA	NA	NA	NA	YP_009337906	Chuviridae	13355	NJRL01001042.1:Aphaenogaster_rudis	9	7	54.3	329	149	0	2	329	96	424	3.047e-103	340	432	1922857	Riboviria	Hubei_chuvirus-like_virus_1	NA	Chuviridae	Chuviridae	Viruses	NA	NA	NA	NA	NA	NA	NA	NA	NA	NA	NA	NA
205	Chuviridae	Cluster16868	23	jcf7180001983227:1592-2213(-):Synergus_japonicus	Synergus_japonicus	jcf7180001983227_1592-2213_-__Synergus_japonicus	jcf7180001983227:Synergus_japonicus	2	NA	NA	NA	NA	NA	YP_009337906	Chuviridae	43200	jcf7180001983227:Synergus_japonicus	2	2	41.9	164	95	0	44	207	194	357	1.566e-30	123	432	1922857	Riboviria	Hubei_chuvirus-like_virus_1	NA	Chuviridae	Chuviridae	Viruses	NA	NA	NA	NA	NA	NA	NA	NA	NA	NA	NA	NA
205	Chuviridae	Cluster16868	23	jcf7180001986094:2567-3212(+):Synergus_japonicus	Synergus_japonicus	jcf7180001986094_2567-3212_+__Synergus_japonicus	jcf7180001986094:Synergus_japonicus	NA	NA	NA	NA	NA	NA	YP_009337906	Chuviridae	164627	jcf7180001986094:Synergus_japonicus	NA	0	48.1	120	62	0	64	183	282	401	2.118e-25	109	432	1922857	Riboviria	Hubei_chuvirus-like_virus_1	NA	Chuviridae	Chuviridae	Viruses	NA	NA	NA	NA	NA	NA	NA	NA	NA	NA	NA	NA
311	Chuviridae	Cluster16868	24	scaffold_27587:2925-3528(+):Copidosoma_sp	Copidosoma_sp	scaffold_27587_2925-3528_+__Copidosoma_sp	scaffold_27587:Copidosoma_sp	2	NA	NA	NA	NA	NA	YP_009337906	Chuviridae	164694	scaffold_27587:Copidosoma_sp	2	0	44	158	87	0	14	171	246	401	1.031e-31	126	432	1922857	Riboviria	Hubei_chuvirus-like_virus_1	NA	Chuviridae	Chuviridae	Viruses	NA	NA	NA	NA	NA	NA	NA	NA	NA	NA	NA	NA
311	Chuviridae	Cluster16868	24	scaffold_32348_1:3246-4008(-):Copidosoma_sp	Copidosoma_sp	scaffold_32348_1_3246-4008_-__Copidosoma_sp	scaffold_32348_1:Copidosoma_sp	3	NA	NA	NA	NA	NA	YP_009337906	Chuviridae	84264	scaffold_32348_1:Copidosoma_sp	3	1	40.5	208	122	0	1	208	195	400	2.341e-38	148	432	1922857	Riboviria	Hubei_chuvirus-like_virus_1	NA	Chuviridae	Chuviridae	Viruses	NA	NA	NA	NA	NA	NA	NA	NA	NA	NA	NA	NA
311	Chuviridae	Cluster16868	26	scaffold_14984:5167-5668(+):Copidosoma_sp	Copidosoma_sp	scaffold_14984_5167-5668_+__Copidosoma_sp	scaffold_14984:Copidosoma_sp	1	NA	NA	NA	NA	NA	YP_009336948	Chuviridae	84072	scaffold_14984:Copidosoma_sp	1	1	40.3	131	78	0	15	145	217	347	4.256e-21	94	450	1922992	Riboviria	Hubei_odonate_virus_11	NA	Chuviridae	Chuviridae	Viruses	NA	NA	NA	NA	NA	NA	NA	NA	NA	NA	NA	NA
311	Chuviridae	Cluster16868	26	scaffold_40883:1999-2419(+):Copidosoma_sp	Copidosoma_sp	scaffold_40883_1999-2419_+__Copidosoma_sp	scaffold_40883:Copidosoma_sp	NA	NA	NA	NA	NA	NA	YP_009337091	Chuviridae	164682	scaffold_40883:Copidosoma_sp	NA	0	39.1	134	80	0	8	140	173	306	5.415e-21	93	396	1922858	Riboviria	Hubei_chuvirus-like_virus_3	NA	Chuviridae	Chuviridae	Viruses	NA	NA	NA	NA	NA	NA	NA	NA	NA	NA	NA	NA
119	Chuviridae	Cluster16868	25	UELV01179396.1:1856-2660(-):Megastigmus_stigmatizans	Megastigmus_stigmatizans	UELV01179396.1_1856-2660_-__Megastigmus_stigmatizans	UELV01179396.1:Megastigmus_stigmatizans	NA	NA	NA	NA	NA	NA	YP_009337906	Chuviridae	60563	UELV01179396.1:Megastigmus_stigmatizans	NA	1	39.6	265	158	0	4	268	158	419	8.398e-50	182	432	1922857	Riboviria	Hubei_chuvirus-like_virus_1	NA	Chuviridae	Chuviridae	Viruses	NA	NA	NA	NA	NA	NA	NA	NA	NA	NA	NA	NA
297	Unclassified	Cluster16868	27	NA	NA	NA	NA	NA	NA	NA	NA	NA	NA	NA	NA	NA	NA	NA	NA	NA	NA	NA	NA	NA	NA	NA	NA	NA	NA	NA	NA	NA	NA	NA	NA	NA	NA	NA	NA	NA	NA	NA	NA	NA	NA	NA	NA	NA	NA
200	Chuviridae	Cluster16868	3	QKQZ01030067.1_2-HSPs_-__Solenopsis_fugax	Solenopsis_fugax	QKQZ01030067.1_2-HSPs_-__Solenopsis_fugax	QKQZ01030067.1:Solenopsis_fugax	4	NA	NA	NA	NA	NA	YP_009337906	Chuviridae	52346	QKQZ01030067.1:Solenopsis_fugax	4	3	61.9	163	61	0	22	181	239	401	3.246e-57	199	432	1922857	Riboviria	Hubei_chuvirus-like_virus_1	NA	Chuviridae	Chuviridae	Viruses	NA	NA	NA	NA	NA	NA	NA	NA	NA	NA	NA	NA
200	Chuviridae	Cluster16868	4	QKQZ01003528.1:73-943(-):Solenopsis_fugax	Solenopsis_fugax	QKQZ01003528.1_73-943_-__Solenopsis_fugax	QKQZ01003528.1:Solenopsis_fugax	2	NA	NA	NA	NA	NA	YP_009337906	Chuviridae	37576	QKQZ01003528.1:Solenopsis_fugax	2	0	48.8	290	147	0	1	290	28	315	4.631e-77	262	432	1922857	Riboviria	Hubei_chuvirus-like_virus_1	NA	Chuviridae	Chuviridae	Viruses	NA	NA	NA	NA	NA	NA	NA	NA	NA	NA	NA	NA
323	Chuviridae	Cluster16868	5	KQ976769.1:120672-121218(+):Cyphomyrmex_costatus	Cyphomyrmex_costatus	KQ976769.1_120672-121218_+__Cyphomyrmex_costatus	KQ976769.1:Cyphomyrmex_costatus	57	NA	NA	0	0	0	YP_009337906	Chuviridae	10710	KQ976769.1:Cyphomyrmex_costatus	57	24	48.4	176	90	0	3	178	96	270	3.208e-43	159	432	1922857	Riboviria	Hubei_chuvirus-like_virus_1	NA	Chuviridae	Chuviridae	Viruses	NA	NA	NA	NA	NA	NA	NA	NA	NA	NA	NA	NA
226	Chuviridae	Cluster16868	6	NW_017303868.1:107-1031(+):Trachymyrmex_septentrionalis	Trachymyrmex_septentrionalis	NW_017303868.1_107-1031_+__Trachymyrmex_septentrionalis	NW_017303868.1:Trachymyrmex_septentrionalis	NA	NA	NA	6	3191.48	3191.48	YP_009337906	Chuviridae	49077	NW_017303868.1:Trachymyrmex_septentrionalis	NA	1	51.7	289	139	0	7	295	37	325	2.007e-83	282	432	1922857	Riboviria	Hubei_chuvirus-like_virus_1	NA	Chuviridae	Chuviridae	Viruses	NA	NA	NA	NA	NA	NA	NA	NA	NA	NA	NA	NA
185	Parvoviridae	Cluster1694	1	JWHX01004522.1:1435-1672(-):Pseudomyrmex_gracilis	Pseudomyrmex_gracilis	JWHX01004522.1_1435-1672_-__Pseudomyrmex_gracilis	JWHX01004522.1:Pseudomyrmex_gracilis	3	NA	NA	0	0	0	YP_009310052	NA	52807	JWHX01004522.1:Pseudomyrmex_gracilis	3	2	39.6	76	39	0	1	66	71	146	4.817e-09	55	170	1907771	unclassified_Densovirinae	Parus_major_densovirus	NA	Parvoviridae	Parvoviridae	Viruses	Densovirinae	NA	NA	NA	NA	NA	NA	NA	NA	NA	NA	NA
185	Parvoviridae	Cluster1694	10	JWHX01000909.1:40181-40328(-):Pseudomyrmex_gracilis	Pseudomyrmex_gracilis	JWHX01000909.1_40181-40328_-__Pseudomyrmex_gracilis	JWHX01000909.1:Pseudomyrmex_gracilis	17	NA	NA	0	0	0	YP_009310052	NA	6455	JWHX01000909.1:Pseudomyrmex_gracilis	17	11	47.7	52	25	0	1	49	72	123	1.882e-07	49	170	1907771	unclassified_Densovirinae	Parus_major_densovirus	NA	Parvoviridae	Parvoviridae	Viruses	Densovirinae	NA	NA	NA	NA	NA	NA	NA	NA	NA	NA	NA
185	Parvoviridae	Cluster1694	11	JWHX01000441.1:24500-24671(+):Pseudomyrmex_gracilis	Pseudomyrmex_gracilis	JWHX01000441.1_24500-24671_+__Pseudomyrmex_gracilis	JWHX01000441.1:Pseudomyrmex_gracilis	42	NA	NA	0	0	0	YP_009310052	NA	6240	JWHX01000441.1:Pseudomyrmex_gracilis	42	22	44.5	60	31	0	1	57	71	130	4.151e-08	51	170	1907771	unclassified_Densovirinae	Parus_major_densovirus	NA	Parvoviridae	Parvoviridae	Viruses	Densovirinae	NA	NA	NA	NA	NA	NA	NA	NA	NA	NA	NA
185	Parvoviridae	Cluster1694	11	JWHX01001617.1:21207-21456(+):Pseudomyrmex_gracilis	Pseudomyrmex_gracilis	JWHX01001617.1_21207-21456_+__Pseudomyrmex_gracilis	JWHX01001617.1:Pseudomyrmex_gracilis	12	NA	NA	0	0	0	YP_009310052	NA	6519	JWHX01001617.1:Pseudomyrmex_gracilis	12	4	35.8	93	53	0	1	83	71	163	4.518e-10	58	170	1907771	unclassified_Densovirinae	Parus_major_densovirus	NA	Parvoviridae	Parvoviridae	Viruses	Densovirinae	NA	NA	NA	NA	NA	NA	NA	NA	NA	NA	NA
185	Parvoviridae	Cluster1694	11	JWHX01002528.1:12256-12463(-):Pseudomyrmex_gracilis	Pseudomyrmex_gracilis	JWHX01002528.1_12256-12463_-__Pseudomyrmex_gracilis	JWHX01002528.1:Pseudomyrmex_gracilis	16	NA	NA	0	0	0	YP_009310052	NA	6558	JWHX01002528.1:Pseudomyrmex_gracilis	16	7	36.4	77	43	0	1	69	87	163	1.924e-07	50	170	1907771	unclassified_Densovirinae	Parus_major_densovirus	NA	Parvoviridae	Parvoviridae	Viruses	Densovirinae	NA	NA	NA	NA	NA	NA	NA	NA	NA	NA	NA
185	Parvoviridae	Cluster1694	12	JWHX01000779.1:34996-35209(+):Pseudomyrmex_gracilis	Pseudomyrmex_gracilis	JWHX01000779.1_34996-35209_+__Pseudomyrmex_gracilis	JWHX01000779.1:Pseudomyrmex_gracilis	23	NA	NA	1	194.031	194.031	YP_009310052	NA	6434	JWHX01000779.1:Pseudomyrmex_gracilis	23	11	38.5	76	40	0	1	66	71	146	1.647e-08	53	170	1907771	unclassified_Densovirinae	Parus_major_densovirus	NA	Parvoviridae	Parvoviridae	Viruses	Densovirinae	NA	NA	NA	NA	NA	NA	NA	NA	NA	NA	NA
185	Parvoviridae	Cluster1694	12	JWHX01001467.1:10428-10998(-):Pseudomyrmex_gracilis	Pseudomyrmex_gracilis	JWHX01001467.1_10428-10998_-__Pseudomyrmex_gracilis	JWHX01001467.1:Pseudomyrmex_gracilis	16	NA	NA	7	509.035	509.035	ACH96204	NA	6505	JWHX01001467.1:Pseudomyrmex_gracilis	16	6	24	161	120	0	31	189	100	260	1.026e-06	53	290	92521	NA	Oryctes_rhinoceros_nudivirus	Alphanudivirus	Nudiviridae	Parvoviridae	Viruses	NA	NA	NA	NA	NA	NA	NA	NA	NA	NA	NA	NA
185	Parvoviridae	Cluster1694	12	JWHX01003257.1:3926-4298(+):Pseudomyrmex_gracilis	Pseudomyrmex_gracilis	JWHX01003257.1_3926-4298_+__Pseudomyrmex_gracilis	JWHX01003257.1:Pseudomyrmex_gracilis	7	NA	NA	4	445.284	445.284	YP_009310052	NA	6572	JWHX01003257.1:Pseudomyrmex_gracilis	7	4	49.3	53	25	0	75	124	71	123	4.689e-07	51	170	1907771	unclassified_Densovirinae	Parus_major_densovirus	NA	Parvoviridae	Parvoviridae	Viruses	Densovirinae	NA	NA	NA	NA	NA	NA	NA	NA	NA	NA	NA
185	Parvoviridae	Cluster1694	13	JWHX01000845.1:44566-45241(+):Pseudomyrmex_gracilis	Pseudomyrmex_gracilis	JWHX01000845.1_44566-45241_+__Pseudomyrmex_gracilis	JWHX01000845.1:Pseudomyrmex_gracilis	14	NA	NA	55	3378.33	3378.33	YP_009310052	NA	6447	JWHX01000845.1:Pseudomyrmex_gracilis	14	6	36.4	93	52	0	143	225	71	163	1.192e-08	59	170	1907771	unclassified_Densovirinae	Parus_major_densovirus	NA	Parvoviridae	Parvoviridae	Viruses	Densovirinae	NA	NA	NA	NA	NA	NA	NA	NA	NA	NA	NA
185	Parvoviridae	Cluster1694	13	JWHX01001727.1:25189-25345(-):Pseudomyrmex_gracilis	Pseudomyrmex_gracilis	JWHX01001727.1_25189-25345_-__Pseudomyrmex_gracilis	JWHX01001727.1:Pseudomyrmex_gracilis	15	NA	NA	0	0	0	YP_009310052	NA	6541	JWHX01001727.1:Pseudomyrmex_gracilis	15	10	48	53	25	0	1	50	71	123	8.415e-08	50	170	1907771	unclassified_Densovirinae	Parus_major_densovirus	NA	Parvoviridae	Parvoviridae	Viruses	Densovirinae	NA	NA	NA	NA	NA	NA	NA	NA	NA	NA	NA
185	Parvoviridae	Cluster1694	15	JWHX01003475.1:6681-7170(+):Pseudomyrmex_gracilis	Pseudomyrmex_gracilis	JWHX01003475.1_6681-7170_+__Pseudomyrmex_gracilis	JWHX01003475.1:Pseudomyrmex_gracilis	2	NA	NA	11	932.143	932.143	YP_009310052	NA	52736	JWHX01003475.1:Pseudomyrmex_gracilis	2	1	35.3	93	53	0	81	163	71	163	1.914e-08	57	170	1907771	unclassified_Densovirinae	Parus_major_densovirus	NA	Parvoviridae	Parvoviridae	Viruses	Densovirinae	NA	NA	NA	NA	NA	NA	NA	NA	NA	NA	NA
185	Parvoviridae	Cluster1694	3	JWHX01000965.1_1:11393-11921(-):Pseudomyrmex_gracilis	Pseudomyrmex_gracilis	JWHX01000965.1_1_11393-11921_-__Pseudomyrmex_gracilis	JWHX01000965.1_1:Pseudomyrmex_gracilis	17	NA	NA	4	313.972	313.972	YP_009310052	NA	6467	JWHX01000965.1_1:Pseudomyrmex_gracilis	17	7	39.6	76	39	0	111	176	71	146	1.227e-07	55	170	1907771	unclassified_Densovirinae	Parus_major_densovirus	NA	Parvoviridae	Parvoviridae	Viruses	Densovirinae	NA	NA	NA	NA	NA	NA	NA	NA	NA	NA	NA
185	Parvoviridae	Cluster1694	4	JWHX01001045.1:40632-41301(+):Pseudomyrmex_gracilis	Pseudomyrmex_gracilis	JWHX01001045.1_40632-41301_+__Pseudomyrmex_gracilis	JWHX01001045.1:Pseudomyrmex_gracilis	14	NA	NA	11	681.716	681.716	YP_009310052	NA	6473	JWHX01001045.1:Pseudomyrmex_gracilis	14	3	35.5	93	53	0	141	223	71	163	5.123e-08	57	170	1907771	unclassified_Densovirinae	Parus_major_densovirus	NA	Parvoviridae	Parvoviridae	Viruses	Densovirinae	NA	NA	NA	NA	NA	NA	NA	NA	NA	NA	NA
185	Parvoviridae	Cluster1694	5	JWHX01001243.1_1:30793-30997(-):Pseudomyrmex_gracilis	Pseudomyrmex_gracilis	JWHX01001243.1_1_30793-30997_-__Pseudomyrmex_gracilis	JWHX01001243.1_1:Pseudomyrmex_gracilis	15	NA	NA	8	1620.4	1620.4	YP_009310052	NA	6480	JWHX01001243.1_1:Pseudomyrmex_gracilis	15	8	47.8	60	29	0	1	57	71	130	1.538e-09	56	170	1907771	unclassified_Densovirinae	Parus_major_densovirus	NA	Parvoviridae	Parvoviridae	Viruses	Densovirinae	NA	NA	NA	NA	NA	NA	NA	NA	NA	NA	NA
185	Parvoviridae	Cluster1694	7	JWHX01000384.1:114319-114988(+):Pseudomyrmex_gracilis	Pseudomyrmex_gracilis	JWHX01000384.1_114319-114988_+__Pseudomyrmex_gracilis	JWHX01000384.1:Pseudomyrmex_gracilis	63	NA	NA	0	0	0	YP_009310052	NA	6233	JWHX01000384.1:Pseudomyrmex_gracilis	63	24	25.8	162	119	0	62	223	2	163	8.531e-09	60	170	1907771	unclassified_Densovirinae	Parus_major_densovirus	NA	Parvoviridae	Parvoviridae	Viruses	Densovirinae	NA	NA	NA	NA	NA	NA	NA	NA	NA	NA	NA
185	Parvoviridae	Cluster1694	8	JWHX01000745.1:50643-51312(+):Pseudomyrmex_gracilis	Pseudomyrmex_gracilis	JWHX01000745.1_50643-51312_+__Pseudomyrmex_gracilis	JWHX01000745.1:Pseudomyrmex_gracilis	37	NA	NA	0	0	0	YP_009310052	NA	6429	JWHX01000745.1:Pseudomyrmex_gracilis	37	13	35.7	93	53	0	141	223	71	163	3.802e-08	58	170	1907771	unclassified_Densovirinae	Parus_major_densovirus	NA	Parvoviridae	Parvoviridae	Viruses	Densovirinae	NA	NA	NA	NA	NA	NA	NA	NA	NA	NA	NA
185	Parvoviridae	Cluster1694	9	JWHX01000649.1:45283-45946(+):Pseudomyrmex_gracilis	Pseudomyrmex_gracilis	JWHX01000649.1_45283-45946_+__Pseudomyrmex_gracilis	JWHX01000649.1:Pseudomyrmex_gracilis	34	NA	NA	15	938.014	938.014	YP_009310052	NA	6421	JWHX01000649.1:Pseudomyrmex_gracilis	34	12	36	93	52	0	139	221	71	163	2.02e-08	59	170	1907771	unclassified_Densovirinae	Parus_major_densovirus	NA	Parvoviridae	Parvoviridae	Viruses	Densovirinae	NA	NA	NA	NA	NA	NA	NA	NA	NA	NA	NA
185	Parvoviridae	Cluster22122	5	JWHX01000098.1:11256-11754(-):Pseudomyrmex_gracilis	Pseudomyrmex_gracilis	JWHX01000098.1_11256-11754_-__Pseudomyrmex_gracilis	JWHX01000098.1:Pseudomyrmex_gracilis	2	NA	NA	8	665.695	665.695	YP_009552708	NA	5827	JWHX01000098.1:Pseudomyrmex_gracilis	2	11	36.8	162	102	0	5	166	315	476	7.763e-24	102	612	2094261	unclassified_Densovirinae	Bombus_cryptarum_densovirus	NA	Parvoviridae	Parvoviridae	Viruses	Densovirinae	NA	NA	NA	NA	NA	NA	NA	NA	NA	NA	NA
185	Parvoviridae	Cluster27049	6	JWHX01000098.1:8331-10125(+):Pseudomyrmex_gracilis	Pseudomyrmex_gracilis	JWHX01000098.1_8331-10125_+__Pseudomyrmex_gracilis	JWHX01000098.1:Pseudomyrmex_gracilis	2	NA	NA	3379	78164.5	78164.5	YP_009552710	NA	5742	JWHX01000098.1:Pseudomyrmex_gracilis	2	11	28.3	572	398	0	23	594	5	560	2.116e-63	235	677	2094261	unclassified_Densovirinae	Bombus_cryptarum_densovirus	NA	Parvoviridae	Parvoviridae	Viruses	Densovirinae	NA	NA	NA	NA	NA	NA	NA	NA	NA	NA	NA
33	Partitiviridae	Cluster17265	1	scaffold_8205:4283-5105(+):Ganaspis_brasiliensis	Ganaspis_brasiliensis	scaffold_8205_4283-5105_+__Ganaspis_brasiliensis	scaffold_8205:Ganaspis_brasiliensis	4	NA	NA	NA	NA	NA	YP_007419078	NA	46529	scaffold_8205:Ganaspis_brasiliensis	4	2	26.3	199	145	0	1	198	175	373	1.813e-13	75	483	859651	Riboviria	Rosellinia_necatrix_partitivirus_2	Alphapartitivirus	Partitiviridae	Partitiviridae	Viruses	NA	NA	NA	NA	NA	NA	NA	NA	NA	NA	NA	NA
7	Partitiviridae	Cluster17265	2	scaffold_15070_0:2776-3226(+):Eretmocerus_eremicus	Eretmocerus_eremicus	scaffold_15070_0_2776-3226_+__Eretmocerus_eremicus	scaffold_15070_0:Eretmocerus_eremicus	1	NA	NA	NA	NA	NA	YP_009273019	NA	82607	scaffold_15070_0:Eretmocerus_eremicus	1	1	32.9	131	87	0	16	146	87	217	1.797e-13	71	487	1849335	Riboviria	Arabidopsis_halleri_partitivirus_1	NA	Partitiviridae	Partitiviridae	Viruses	NA	NA	NA	NA	NA	NA	NA	NA	NA	NA	NA	NA
92	Partitiviridae	Cluster17265	3	IDBA_scaffold_32378:682-1552(+):Leptopilina_heterotoma	Leptopilina_heterotoma	IDBA_scaffold_32378_682-1552_+__Leptopilina_heterotoma	IDBA_scaffold_32378:Leptopilina_heterotoma	NA	NA	NA	13	7.9839	7.9839	YP_007419078	NA	107324	IDBA_scaffold_32378:Leptopilina_heterotoma	NA	0	23	271	201	0	29	290	103	373	1.207e-14	79	483	859651	Riboviria	Rosellinia_necatrix_partitivirus_2	Alphapartitivirus	Partitiviridae	Partitiviridae	Viruses	NA	NA	NA	NA	NA	NA	NA	NA	NA	NA	NA	NA
86	Partitiviridae	Cluster17265	5	scf7180005167187:188-683(+):Leptopilina_clavipes	Leptopilina_clavipes	scf7180005167187_188-683_+__Leptopilina_clavipes	scf7180005167187:Leptopilina_clavipes	2	NA	NA	0	0	0	YP_009551596	NA	64650	scf7180005167187:Leptopilina_clavipes	2	3	32.8	130	85	0	36	165	94	221	5.436e-13	70	491	2043550	Riboviria	Medicago_sativa_alphapartitivirus_1	Alphapartitivirus	Partitiviridae	Partitiviridae	Viruses	NA	NA	NA	NA	NA	NA	NA	NA	NA	NA	NA	NA
233	Iridoviridae	Cluster17266	1	scaffold_2875:22289-22473(-):Trichopria_sp_970989	Trichopria_sp_970989	scaffold_2875_22289-22473_-__Trichopria_sp_970989	scaffold_2875:Trichopria_sp_970989	1	NA	NA	NA	NA	NA	YP_006347598	NA	170282	scaffold_2875:Trichopria_sp_970989	1	0	48.6	57	29	0	1	57	9	65	3.933e-09	54	77	84739	NA	European_catfish_virus	Ranavirus	Iridoviridae	Iridoviridae	Viruses	Alphairidovirinae	NA	NA	NA	NA	NA	NA	NA	NA	NA	NA	NA
56	Iridoviridae	Cluster17266	2	scaffold_4262:22-202(-):Ichneumoninae_B	Ichneumoninae_B	scaffold_4262_22-202_-__Ichneumoninae_B	scaffold_4262:Ichneumoninae_B	NA	NA	NA	NA	NA	NA	YP_006347598	NA	45721	scaffold_4262:Ichneumoninae_B	NA	0	53.7	60	27	0	1	60	6	65	1.295e-12	64	77	84739	NA	European_catfish_virus	Ranavirus	Iridoviridae	Iridoviridae	Viruses	Alphairidovirinae	NA	NA	NA	NA	NA	NA	NA	NA	NA	NA	NA
26	Nudiviridae	Cluster17433	1	UXGB01004222.1_2-HSPs_-__Eurytoma_brunniventris	Eurytoma_brunniventris	UXGB01004222.1_2-HSPs_-__Eurytoma_brunniventris	UXGB01004222.1:Eurytoma_brunniventris	NA	NA	NA	NA	NA	0	YP_009116721	NA	78025	UXGB01004222.1:Eurytoma_brunniventris	NA	3	27.9	207	140	0	1	195	195	401	1.382e-17	86	430	1546257	unclassified_Nudiviridae	Tipula_oleracea_nudivirus	NA	Nudiviridae	Nudiviridae	Viruses	NA	NA	NA	NA	NA	NA	NA	NA	NA	NA	NA	NA
26	Nudiviridae	Cluster17433	1	UXGB01004222.1:4246-4894(-):Eurytoma_brunniventris	Eurytoma_brunniventris	UXGB01004222.1_4246-4894_-__Eurytoma_brunniventris	UXGB01004222.1:Eurytoma_brunniventris	NA	NA	NA	0	0	0	YP_009116721	NA	78025	UXGB01004222.1:Eurytoma_brunniventris	NA	3	27.9	207	140	0	1	195	195	401	1.382e-17	86	430	1546257	unclassified_Nudiviridae	Tipula_oleracea_nudivirus	NA	Nudiviridae	Nudiviridae	Viruses	NA	NA	NA	NA	NA	NA	NA	NA	NA	NA	NA	NA
26	Nudiviridae	Cluster17433	1	UXGB01004222.1:4897-5455(-):Eurytoma_brunniventris	Eurytoma_brunniventris	UXGB01004222.1_4897-5455_-__Eurytoma_brunniventris	UXGB01004222.1:Eurytoma_brunniventris	NA	NA	NA	0	0	0	YP_009051848	NA	78019	UXGB01004222.1:Eurytoma_brunniventris	NA	3	31.4	150	102	0	20	169	21	170	1.809e-14	76	449	1529056	unclassified_Nudiviridae	Penaeus_monodon_nudivirus	NA	Nudiviridae	Nudiviridae	Viruses	NA	NA	NA	NA	NA	NA	NA	NA	NA	NA	NA	NA
26	Nudiviridae	Cluster17704	3	UXGB01002149.1:16415-16868(-):Eurytoma_brunniventris	Eurytoma_brunniventris	UXGB01002149.1_16415-16868_-__Eurytoma_brunniventris	UXGB01002149.1:Eurytoma_brunniventris	NA	NA	NA	0	0	0	YP_009116660	NA	77772	UXGB01002149.1:Eurytoma_brunniventris	NA	1	41.9	144	83	0	1	144	50	193	2.078e-26	109	193	1546257	unclassified_Nudiviridae	Tipula_oleracea_nudivirus	NA	Nudiviridae	Nudiviridae	Viruses	NA	NA	NA	NA	NA	NA	NA	NA	NA	NA	NA	NA
26	Nudiviridae	Cluster201	1	UXGB01056363.1:54-828(+):Eurytoma_brunniventris	Eurytoma_brunniventris	UXGB01056363.1_54-828_+__Eurytoma_brunniventris	UXGB01056363.1:Eurytoma_brunniventris	NA	NA	NA	0	0	0	YP_009116648	NA	170874	UXGB01056363.1:Eurytoma_brunniventris	NA	0	26.3	225	145	0	23	247	83	280	1.321e-16	84	479	1546257	unclassified_Nudiviridae	Tipula_oleracea_nudivirus	NA	Nudiviridae	Nudiviridae	Viruses	NA	NA	NA	NA	NA	NA	NA	NA	NA	NA	NA	NA
26	Nudiviridae	Cluster3072	3	UXGB01003878.1:6174-6945(+):Eurytoma_brunniventris	Eurytoma_brunniventris	UXGB01003878.1_6174-6945_+__Eurytoma_brunniventris	UXGB01003878.1:Eurytoma_brunniventris	NA	NA	NA	2	579.747	579.747	YP_009116762	NA	77815	UXGB01003878.1:Eurytoma_brunniventris	NA	2	27.9	249	170	0	1	237	74	322	1.407e-22	102	333	1546257	unclassified_Nudiviridae	Tipula_oleracea_nudivirus	NA	Nudiviridae	Nudiviridae	Viruses	NA	NA	NA	NA	NA	NA	NA	NA	NA	NA	NA	NA
26	Nudiviridae	Cluster312	2	UXGB01004222.1:5553-6486(+):Eurytoma_brunniventris	Eurytoma_brunniventris	UXGB01004222.1_5553-6486_+__Eurytoma_brunniventris	UXGB01004222.1:Eurytoma_brunniventris	NA	NA	NA	0	0	0	YP_009051847	NA	77908	UXGB01004222.1:Eurytoma_brunniventris	NA	3	31.5	296	197	0	8	303	11	299	9.3e-37	146	675	1529056	unclassified_Nudiviridae	Penaeus_monodon_nudivirus	NA	Nudiviridae	Nudiviridae	Viruses	NA	NA	NA	NA	NA	NA	NA	NA	NA	NA	NA	NA
26	Nudiviridae	Cluster5096	3	UXGB01002149.1:13883-14384(-):Eurytoma_brunniventris	Eurytoma_brunniventris	UXGB01002149.1_13883-14384_-__Eurytoma_brunniventris	UXGB01002149.1:Eurytoma_brunniventris	NA	NA	NA	0	0	0	YP_009116766	NA	77800	UXGB01002149.1:Eurytoma_brunniventris	NA	1	38.7	150	86	0	15	164	12	152	1.103e-23	102	327	1546257	unclassified_Nudiviridae	Tipula_oleracea_nudivirus	NA	Nudiviridae	Nudiviridae	Viruses	NA	NA	NA	NA	NA	NA	NA	NA	NA	NA	NA	NA
26	Nudiviridae	Cluster9535	4	UXGB01004222.1:2614-3850(+):Eurytoma_brunniventris	Eurytoma_brunniventris	UXGB01004222.1_2614-3850_+__Eurytoma_brunniventris	UXGB01004222.1:Eurytoma_brunniventris	NA	NA	NA	0	0	0	YP_009116672	NA	78014	UXGB01004222.1:Eurytoma_brunniventris	NA	3	22	368	271	0	64	411	112	479	8.566e-20	97	494	1546257	unclassified_Nudiviridae	Tipula_oleracea_nudivirus	NA	Nudiviridae	Nudiviridae	Viruses	NA	NA	NA	NA	NA	NA	NA	NA	NA	NA	NA	NA
127	Nudiviridae	Cluster17433	4	NW_014463939.1:1567708-1568830(-):Microplitis_demolitor	Microplitis_demolitor	NW_014463939.1_1567708-1568830_-__Microplitis_demolitor	NW_014463939.1:Microplitis_demolitor	6	NA	NA	20064	13479.3	13479.3	YP_009116721	NA	21091	NW_014463939.1:Microplitis_demolitor	6	199	26.3	374	274	0	1	374	1	373	4.05e-33	137	430	1546257	unclassified_Nudiviridae	Tipula_oleracea_nudivirus	NA	Nudiviridae	Nudiviridae	Viruses	NA	NA	NA	NA	NA	NA	NA	NA	NA	NA	NA	NA
127	Nudiviridae	Cluster5096	2	NW_014463854.1_7:880548-881166(-):Microplitis_demolitor	Microplitis_demolitor	NW_014463854.1_7_880548-881166_-__Microplitis_demolitor	NW_014463854.1_7:Microplitis_demolitor	8	NA	NA	17168	20924.6	20924.6	YP_009553401	NA	20711	NW_014463854.1_7:Microplitis_demolitor	8	161	36	155	93	0	2	156	13	158	8.406e-21	95	287	2053981	unclassified_Nudiviridae	Tomelloso_virus	NA	Nudiviridae	Nudiviridae	Viruses	NA	NA	NA	NA	NA	NA	NA	NA	NA	NA	NA	NA
151	Orthomyxoviridae	Cluster17514	10	UCOM01006900.1:2124-2571(+):Ormyrus_pomaceus	Ormyrus_pomaceus	UCOM01006900.1_2124-2571_+__Ormyrus_pomaceus	UCOM01006900.1:Ormyrus_pomaceus	NA	NA	NA	NA	NA	NA	YP_009508041	NA	41274	UCOM01006900.1:Ormyrus_pomaceus	NA	1	30.8	149	102	0	1	149	240	388	3.635e-14	73	527	688436	Riboviria	Quaranfil_quaranjavirus	Quaranjavirus	Orthomyxoviridae	Orthomyxoviridae	Viruses	NA	NA	NA	NA	Articulavirales	NA	NA	NA	Insthoviricetes	Polyploviricotina	Negarnaviricota	NA
48	Orthomyxoviridae	Cluster17514	11	scaffold_4464:10260-11328(-):Ganaspis_ganaspis	Ganaspis_ganaspis	scaffold_4464_10260-11328_-__Ganaspis_ganaspis	scaffold_4464:Ganaspis_ganaspis	NA	NA	NA	NA	NA	NA	YP_009508041	NA	170232	scaffold_4464:Ganaspis_ganaspis	NA	0	21.2	330	246	0	27	356	104	416	3.827e-15	82	527	688436	Riboviria	Quaranfil_quaranjavirus	Quaranjavirus	Orthomyxoviridae	Orthomyxoviridae	Viruses	NA	NA	NA	NA	Articulavirales	NA	NA	NA	Insthoviricetes	Polyploviricotina	Negarnaviricota	NA
108	Orthomyxoviridae	Cluster17514	12	GL985757.1_3:5262-6003(-):Megachile_rotundata	Megachile_rotundata	GL985757.1_3_5262-6003_-__Megachile_rotundata	GL985757.1_3:Megachile_rotundata	10	NA	NA	195	2799.57	2799.57	YP_009508041	NA	4953	GL985757.1_3:Megachile_rotundata	10	9	26.8	229	165	0	19	247	286	512	3.612e-18	89	527	688436	Riboviria	Quaranfil_quaranjavirus	Quaranjavirus	Orthomyxoviridae	Orthomyxoviridae	Viruses	NA	NA	NA	NA	Articulavirales	NA	NA	NA	Insthoviricetes	Polyploviricotina	Negarnaviricota	NA
177	Orthomyxoviridae	Cluster17514	2	scaffold_75753:574-1306(+):Platygaster_orseoliae	Platygaster_orseoliae	scaffold_75753_574-1306_+__Platygaster_orseoliae	scaffold_75753:Platygaster_orseoliae	1	NA	NA	NA	NA	NA	YP_009110683	NA	170225	scaffold_75753:Platygaster_orseoliae	1	0	20.9	262	192	0	1	244	114	375	4.592e-10	64	537	1566309	Riboviria	Wellfleet_Bay_virus	Quaranjavirus	Orthomyxoviridae	Orthomyxoviridae	Viruses	NA	NA	NA	NA	Articulavirales	NA	NA	NA	Insthoviricetes	Polyploviricotina	Negarnaviricota	NA
177	Orthomyxoviridae	Cluster17514	3	scaffold_5833:477-1584(+):Platygaster_orseoliae	Platygaster_orseoliae	scaffold_5833_477-1584_+__Platygaster_orseoliae	scaffold_5833:Platygaster_orseoliae	9	NA	NA	NA	NA	NA	YP_009508041	NA	54415	scaffold_5833:Platygaster_orseoliae	9	1	24.4	355	261	0	15	369	82	427	1.421e-25	114	527	688436	Riboviria	Quaranfil_quaranjavirus	Quaranjavirus	Orthomyxoviridae	Orthomyxoviridae	Viruses	NA	NA	NA	NA	Articulavirales	NA	NA	NA	Insthoviricetes	Polyploviricotina	Negarnaviricota	NA
177	Orthomyxoviridae	Cluster23103	4	scaffold_5833:9818-10091(+):Platygaster_orseoliae	Platygaster_orseoliae	scaffold_5833_9818-10091_+__Platygaster_orseoliae	scaffold_5833:Platygaster_orseoliae	9	NA	NA	NA	NA	NA	YP_009351837	NA	54416	scaffold_5833:Platygaster_orseoliae	9	1	45.1	88	48	0	4	91	107	194	1.435e-15	74	213	1170422	Riboviria	Loreto_virus	Negevirus	Negevirus-like	Negevirus-like	Viruses	NA	NA	NA	NA	NA	NA	NA	NA	NA	NA	NA	NA
106	Orthomyxoviridae	Cluster17514	4	MVJL01009402.1:2718-3792(+):Macrocentrus_cingulum	Macrocentrus_cingulum	MVJL01009402.1_2718-3792_+__Macrocentrus_cingulum	MVJL01009402.1:Macrocentrus_cingulum	4	NA	NA	NA	NA	NA	YP_009508041	NA	62366	MVJL01009402.1:Macrocentrus_cingulum	4	1	23.9	358	262	0	1	358	183	527	9.408e-25	111	527	688436	Riboviria	Quaranfil_quaranjavirus	Quaranjavirus	Orthomyxoviridae	Orthomyxoviridae	Viruses	NA	NA	NA	NA	Articulavirales	NA	NA	NA	Insthoviricetes	Polyploviricotina	Negarnaviricota	NA
106	Orthomyxoviridae	Cluster25892	3	MVJL01003038.1:76128-76914(+):Macrocentrus_cingulum	Macrocentrus_cingulum	MVJL01003038.1_76128-76914_+__Macrocentrus_cingulum	MVJL01003038.1:Macrocentrus_cingulum	1	NA	NA	NA	NA	NA	YP_009508040	NA	61832	MVJL01003038.1:Macrocentrus_cingulum	1	11	25	263	195	0	1	261	345	607	2.064e-18	90	688	688436	Riboviria	Quaranfil_quaranjavirus	Quaranjavirus	Orthomyxoviridae	Orthomyxoviridae	Viruses	NA	NA	NA	NA	Articulavirales	NA	NA	NA	Insthoviricetes	Polyploviricotina	Negarnaviricota	NA
106	Orthomyxoviridae	Cluster25892	3	MVJL01007595.1:36701-37703(+):Macrocentrus_cingulum	Macrocentrus_cingulum	MVJL01007595.1_36701-37703_+__Macrocentrus_cingulum	MVJL01007595.1:Macrocentrus_cingulum	7	NA	NA	NA	NA	NA	YP_009110687	NA	62324	MVJL01007595.1:Macrocentrus_cingulum	7	4	31.8	341	226	0	2	334	440	780	8.905e-45	170	784	1566309	Riboviria	Wellfleet_Bay_virus	Quaranjavirus	Orthomyxoviridae	Orthomyxoviridae	Viruses	NA	NA	NA	NA	Articulavirales	NA	NA	NA	Insthoviricetes	Polyploviricotina	Negarnaviricota	NA
299	Orthomyxoviridae	Cluster17514	5	NW_014327196.1:5236317-5237232(-):Copidosoma_floridanum	Copidosoma_floridanum	NW_014327196.1_5236317-5237232_-__Copidosoma_floridanum	NW_014327196.1:Copidosoma_floridanum	21	NA	NA	316	83708.4	83708.4	YP_009508041	NA	19879	NW_014327196.1:Copidosoma_floridanum	21	353	23.6	298	214	0	5	302	237	517	1.504e-18	91	527	688436	Riboviria	Quaranfil_quaranjavirus	Quaranjavirus	Orthomyxoviridae	Orthomyxoviridae	Viruses	NA	NA	NA	NA	Articulavirales	NA	NA	NA	Insthoviricetes	Polyploviricotina	Negarnaviricota	NA
248	Orthomyxoviridae	Cluster17514	6	scaffold_248_1:14274-14787(-):Tryphoninae_A	Tryphoninae_A	scaffold_248_1_14274-14787_-__Tryphoninae_A	scaffold_248_1:Tryphoninae_A	19	NA	NA	NA	NA	NA	YP_009110683	NA	45503	scaffold_248_1:Tryphoninae_A	19	3	24.6	178	128	0	1	171	338	515	1.481e-09	61	537	1566309	Riboviria	Wellfleet_Bay_virus	Quaranjavirus	Orthomyxoviridae	Orthomyxoviridae	Viruses	NA	NA	NA	NA	Articulavirales	NA	NA	NA	Insthoviricetes	Polyploviricotina	Negarnaviricota	NA
140	Orthomyxoviridae	Cluster17514	7	REGV01003187.1:1967-2549(-):Nomia_melanderi	Nomia_melanderi	REGV01003187.1_1967-2549_-__Nomia_melanderi	REGV01003187.1:Nomia_melanderi	30	NA	NA	NA	NA	NA	YP_009110683	NA	38185	REGV01003187.1:Nomia_melanderi	30	8	29.9	195	131	0	7	194	328	522	2.398e-19	90	537	1566309	Riboviria	Wellfleet_Bay_virus	Quaranjavirus	Orthomyxoviridae	Orthomyxoviridae	Viruses	NA	NA	NA	NA	Articulavirales	NA	NA	NA	Insthoviricetes	Polyploviricotina	Negarnaviricota	NA
327	Orthomyxoviridae	Cluster17514	8	KQ434765.1:117561-118431(+):Dufourea_novaeangliae	Dufourea_novaeangliae	KQ434765.1_117561-118431_+__Dufourea_novaeangliae	KQ434765.1:Dufourea_novaeangliae	40	NA	NA	NA	NA	NA	YP_009508041	NA	9296	KQ434765.1:Dufourea_novaeangliae	40	26	27.6	291	209	0	1	290	222	512	2.925e-27	117	527	688436	Riboviria	Quaranfil_quaranjavirus	Quaranjavirus	Orthomyxoviridae	Orthomyxoviridae	Viruses	NA	NA	NA	NA	Articulavirales	NA	NA	NA	Insthoviricetes	Polyploviricotina	Negarnaviricota	NA
27	Phycodnaviridae	Cluster17518	1	NW_011887852.1:256430-256622(+):Fopius_arisanus	Fopius_arisanus	NW_011887852.1_256430-256622_+__Fopius_arisanus	NW_011887852.1:Fopius_arisanus	1	NA	NA	2748	15567.6	15567.6	ABT14332	NA	19019	NW_011887852.1:Fopius_arisanus	1	46	48.9	64	32	0	1	64	5	68	2.017e-11	61	68	346932	Paramecium_bursaria_chlorella_virus_MT325	Paramecium_bursaria_Chlorella_virus_A1	Chlorovirus	Phycodnaviridae	Phycodnaviridae	Viruses	NA	NA	NA	NA	NA	NA	NA	NA	NA	NA	NA	NA
27	Phycodnaviridae	Cluster22895	5	NW_011887751.1:338629-339124(-):Fopius_arisanus	Fopius_arisanus	NW_011887751.1_338629-339124_-__Fopius_arisanus	NW_011887751.1:Fopius_arisanus	61	NA	NA	1628	3588.68	3588.68	ABT14104	NA	17932	NW_011887751.1:Fopius_arisanus	61	118	27.1	165	119	0	1	165	102	265	1.654e-11	66	330	346932	Paramecium_bursaria_chlorella_virus_MT325	Paramecium_bursaria_Chlorella_virus_A1	Chlorovirus	Phycodnaviridae	Phycodnaviridae	Viruses	NA	NA	NA	NA	NA	NA	NA	NA	NA	NA	NA	NA
366	Phycodnaviridae	Cluster17518	2	scaffold_3222:2258-2456(+):Meteorus_colon_F	Meteorus_colon_F	scaffold_3222_2258-2456_+__Meteorus_colon_F	scaffold_3222:Meteorus_colon_F	NA	NA	NA	NA	NA	NA	ABT14332	NA	59354	scaffold_3222:Meteorus_colon_F	NA	1	48.9	57	29	0	1	57	3	59	3.639e-09	55	68	346932	Paramecium_bursaria_chlorella_virus_MT325	Paramecium_bursaria_Chlorella_virus_A1	Chlorovirus	Phycodnaviridae	Phycodnaviridae	Viruses	NA	NA	NA	NA	NA	NA	NA	NA	NA	NA	NA	NA
366	Phycodnaviridae	Cluster17518	2	scaffold_92:198703-198901(-):Meteorus_colon_M	Meteorus_colon_M	scaffold_92_198703-198901_-__Meteorus_colon_M	scaffold_92:Meteorus_colon_M	NA	NA	NA	NA	NA	NA	ABT14332	NA	59224	scaffold_92:Meteorus_colon_M	NA	11	48.9	57	29	0	1	57	3	59	3.639e-09	55	68	346932	Paramecium_bursaria_chlorella_virus_MT325	Paramecium_bursaria_Chlorella_virus_A1	Chlorovirus	Phycodnaviridae	Phycodnaviridae	Viruses	NA	NA	NA	NA	NA	NA	NA	NA	NA	NA	NA	NA
112	Iridoviridae	Cluster17557	1	scaffold_649:51076-51256(-):Anagyrus_pseudococci	Anagyrus_pseudococci	scaffold_649_51076-51256_-__Anagyrus_pseudococci	scaffold_649:Anagyrus_pseudococci	NA	NA	NA	NA	NA	NA	AMM72788	NA	46071	scaffold_649:Anagyrus_pseudococci	NA	13	63.6	60	21	0	1	60	1	60	1.888e-17	78	73	176655	Giant_seaperch_iridovirus	Infectious_spleen_and_kidney_necrosis_virus	Megalocytivirus	Iridoviridae	Iridoviridae	Viruses	Alphairidovirinae	NA	NA	NA	NA	NA	NA	NA	NA	NA	NA	NA
143	Iridoviridae	Cluster17557	3	scaffold_431:9997-10156(+):Ophioninae_A	Ophioninae_A	scaffold_431_9997-10156_+__Ophioninae_A	scaffold_431:Ophioninae_A	3	NA	NA	NA	NA	NA	AMM72788	NA	45731	scaffold_431:Ophioninae_A	3	5	51.8	53	25	0	1	53	8	60	1.916e-09	55	73	176655	Giant_seaperch_iridovirus	Infectious_spleen_and_kidney_necrosis_virus	Megalocytivirus	Iridoviridae	Iridoviridae	Viruses	Alphairidovirinae	NA	NA	NA	NA	NA	NA	NA	NA	NA	NA	NA
286	Iridoviridae	Cluster17557	4	KB466017.1_1:107720-107909(-):Cephus_cinctus	Cephus_cinctus	KB466017.1_1_107720-107909_-__Cephus_cinctus	KB466017.1_1:Cephus_cinctus	3	NA	NA	1335	28605.6	28605.6	AMM72788	NA	7868	KB466017.1_1:Cephus_cinctus	3	33	50.5	64	31	0	1	63	8	71	2.841e-12	63	73	176655	Giant_seaperch_iridovirus	Infectious_spleen_and_kidney_necrosis_virus	Megalocytivirus	Iridoviridae	Iridoviridae	Viruses	Alphairidovirinae	NA	NA	NA	NA	NA	NA	NA	NA	NA	NA	NA
289	Iridoviridae	Cluster17557	5	SHCU01000005.1:683501-683669(-):Ceratina_australensis	Ceratina_australensis	SHCU01000005.1_683501-683669_-__Ceratina_australensis	SHCU01000005.1:Ceratina_australensis	51	NA	NA	132	598415	598415	AMM72788	NA	39682	SHCU01000005.1:Ceratina_australensis	51	186	56.8	56	24	0	1	56	8	63	1.06e-12	64	73	176655	Giant_seaperch_iridovirus	Infectious_spleen_and_kidney_necrosis_virus	Megalocytivirus	Iridoviridae	Iridoviridae	Viruses	Alphairidovirinae	NA	NA	NA	NA	NA	NA	NA	NA	NA	NA	NA
118	Iridoviridae	Cluster17557	6	UELV01175460.1:12781-12940(-):Megastigmus_stigmatizans	Megastigmus_stigmatizans	UELV01175460.1_12781-12940_-__Megastigmus_stigmatizans	UELV01175460.1:Megastigmus_stigmatizans	3	NA	NA	NA	NA	NA	AMM72788	NA	60555	UELV01175460.1:Megastigmus_stigmatizans	3	1	55.3	53	23	0	1	53	8	60	5.732e-11	59	73	176655	Giant_seaperch_iridovirus	Infectious_spleen_and_kidney_necrosis_virus	Megalocytivirus	Iridoviridae	Iridoviridae	Viruses	Alphairidovirinae	NA	NA	NA	NA	NA	NA	NA	NA	NA	NA	NA
301	Iridoviridae	Cluster17557	7	scaffold_25556:4996-5134(-):Copidosoma_sp	Copidosoma_sp	scaffold_25556_4996-5134_-__Copidosoma_sp	scaffold_25556:Copidosoma_sp	NA	NA	NA	NA	NA	NA	AMM72788	NA	84169	scaffold_25556:Copidosoma_sp	NA	1	58.8	46	19	0	1	46	1	46	7.037e-10	55	73	176655	Giant_seaperch_iridovirus	Infectious_spleen_and_kidney_necrosis_virus	Megalocytivirus	Iridoviridae	Iridoviridae	Viruses	Alphairidovirinae	NA	NA	NA	NA	NA	NA	NA	NA	NA	NA	NA
364	Iridoviridae	Cluster17557	8	scaffold_146:125820-126000(+):Meteorus_colon_M	Meteorus_colon_M	scaffold_146_125820-126000_+__Meteorus_colon_M	scaffold_146:Meteorus_colon_M	NA	NA	NA	NA	NA	NA	AMM72788	NA	58845	scaffold_146:Meteorus_colon_M	NA	27	58.5	60	24	0	1	60	1	60	5.783e-15	71	73	176655	Giant_seaperch_iridovirus	Infectious_spleen_and_kidney_necrosis_virus	Megalocytivirus	Iridoviridae	Iridoviridae	Viruses	Alphairidovirinae	NA	NA	NA	NA	NA	NA	NA	NA	NA	NA	NA
364	Iridoviridae	Cluster17557	8	scaffold_59:101366-101546(+):Meteorus_colon_F	Meteorus_colon_F	scaffold_59_101366-101546_+__Meteorus_colon_F	scaffold_59:Meteorus_colon_F	NA	NA	NA	NA	NA	NA	AMM72788	NA	59433	scaffold_59:Meteorus_colon_F	NA	24	58.5	60	24	0	1	60	1	60	5.783e-15	71	73	176655	Giant_seaperch_iridovirus	Infectious_spleen_and_kidney_necrosis_virus	Megalocytivirus	Iridoviridae	Iridoviridae	Viruses	Alphairidovirinae	NA	NA	NA	NA	NA	NA	NA	NA	NA	NA	NA
364	Iridoviridae	Cluster17557	8	scaffold_78:286199-286358(-):Meteorus_cinctellus	Meteorus_cinctellus	scaffold_78_286199-286358_-__Meteorus_cinctellus	scaffold_78:Meteorus_cinctellus	NA	NA	NA	NA	NA	NA	AMM72788	NA	60100	scaffold_78:Meteorus_cinctellus	NA	40	55.9	53	23	0	1	53	8	60	3.029e-11	60	73	176655	Giant_seaperch_iridovirus	Infectious_spleen_and_kidney_necrosis_virus	Megalocytivirus	Iridoviridae	Iridoviridae	Viruses	Alphairidovirinae	NA	NA	NA	NA	NA	NA	NA	NA	NA	NA	NA
232	Unclassified_ssRNA	Cluster1757	1	scaffold_105:24247-26389(-):Trichopria_sp_970989	Trichopria_sp_970989	scaffold_105_24247-26389_-__Trichopria_sp_970989	scaffold_105:Trichopria_sp_970989	2	NA	NA	NA	NA	NA	YP_009179388	NA	43452	scaffold_105:Trichopria_sp_970989	2	5	32.1	700	397	0	6	705	294	878	1.145e-100	349	907	1746067	Riboviria	Wuhan_aphid_virus_1	NA	Unknown	Unclassified ssRNA	Viruses	NA	NA	NA	NA	NA	NA	NA	NA	NA	NA	NA	NA
176	Unclassified_ssRNA	Cluster1757	2	scaffold_17971_0:3994-5001(-):Platygaster_orseoliae	Platygaster_orseoliae	scaffold_17971_0_3994-5001_-__Platygaster_orseoliae	scaffold_17971_0:Platygaster_orseoliae	1	NA	NA	NA	NA	NA	YP_009179403	NA	45174	scaffold_17971_0:Platygaster_orseoliae	1	0	56.4	290	125	0	1	287	324	613	2.131e-94	315	911	1746071	Riboviria	Wuhan_flea_virus	NA	Unknown	Unclassified ssRNA	Viruses	NA	NA	NA	NA	NA	NA	NA	NA	NA	NA	NA	NA
300	Poxviridae	Cluster1758	1	NW_014327571.1:539378-539756(-):Copidosoma_floridanum	Copidosoma_floridanum	NW_014327571.1_539378-539756_-__Copidosoma_floridanum	NW_014327571.1:Copidosoma_floridanum	196	NA	NA	1	640.234	640.234	NP_064804	NA	20098	NW_014327571.1:Copidosoma_floridanum	196	18	29.1	126	82	0	1	126	11	127	4.564e-09	57	192	28321	NA	Amsacta_moorei_entomopoxvirus	Betaentomopoxvirus	Poxviridae	Poxviridae	Viruses	Entomopoxvirinae	NA	NA	NA	NA	NA	NA	NA	NA	NA	NA	NA
300	Poxviridae	Cluster26257	2	NW_014327282.1:1372828-1373542(-):Copidosoma_floridanum	Copidosoma_floridanum	NW_014327282.1_1372828-1373542_-__Copidosoma_floridanum	NW_014327282.1:Copidosoma_floridanum	12	NA	NA	51	17307.8	17307.8	YP_009001555	NA	19956	NW_014327282.1:Copidosoma_floridanum	12	112	33.2	216	128	0	22	237	31	222	1.209e-27	116	223	62099	NA	Anomala_cuprea_entomopoxvirus	Alphaentomopoxvirus	Poxviridae	Poxviridae	Viruses	Entomopoxvirinae	NA	NA	NA	NA	NA	NA	NA	NA	NA	NA	NA
19	Poxviridae	Cluster1758	10	scaffold_209546:664-886(-):Eupelmus_kiefferi	Eupelmus_kiefferi	scaffold_209546_664-886_-__Eupelmus_kiefferi	scaffold_209546:Eupelmus_kiefferi	NA	NA	NA	NA	NA	NA	YP_008004440	NA	102210	scaffold_209546:Eupelmus_kiefferi	NA	0	42.6	72	40	0	1	72	30	99	5.692e-10	57	195	1293539	Choristoneura_rosaceana_entomopoxvirus_'L'	Choristoneura_rosaceana_entomopoxvirus	Betaentomopoxvirus	Poxviridae	Poxviridae	Viruses	Entomopoxvirinae	NA	NA	NA	NA	NA	NA	NA	NA	NA	NA	NA
19	Poxviridae	Cluster1758	10	scaffold_302182:66-360(+):Eupelmus_kiefferi	Eupelmus_kiefferi	scaffold_302182_66-360_+__Eupelmus_kiefferi	scaffold_302182:Eupelmus_kiefferi	NA	NA	NA	NA	NA	NA	YP_008004440	NA	102195	scaffold_302182:Eupelmus_kiefferi	NA	0	40.3	72	41	0	19	90	30	99	3.806e-08	53	195	1293539	Choristoneura_rosaceana_entomopoxvirus_'L'	Choristoneura_rosaceana_entomopoxvirus	Betaentomopoxvirus	Poxviridae	Poxviridae	Viruses	Entomopoxvirinae	NA	NA	NA	NA	NA	NA	NA	NA	NA	NA	NA
19	Poxviridae	Cluster1758	10	scaffold_336676:27-264(-):Eupelmus_kiefferi	Eupelmus_kiefferi	scaffold_336676_27-264_-__Eupelmus_kiefferi	scaffold_336676:Eupelmus_kiefferi	NA	NA	NA	NA	NA	NA	YP_008004440	NA	102070	scaffold_336676:Eupelmus_kiefferi	NA	0	40.5	71	40	0	1	71	31	99	2.364e-08	53	195	1293539	Choristoneura_rosaceana_entomopoxvirus_'L'	Choristoneura_rosaceana_entomopoxvirus	Betaentomopoxvirus	Poxviridae	Poxviridae	Viruses	Entomopoxvirinae	NA	NA	NA	NA	NA	NA	NA	NA	NA	NA	NA
21	Poxviridae	Cluster1758	11	UELX01018365.1:1947-2274(-):Eupelmus_urozonus	Eupelmus_urozonus	UELX01018365.1_1947-2274_-__Eupelmus_urozonus	UELX01018365.1:Eupelmus_urozonus	1	NA	NA	0	0	0	YP_008003563	NA	102277	UELX01018365.1:Eupelmus_urozonus	1	0	33.8	105	66	0	3	107	8	107	2.712e-10	60	194	1293572	Mythimna_separata_entomopoxvirus_'L'	Mythimna_separata_entomopoxvirus	Betaentomopoxvirus	Poxviridae	Poxviridae	Viruses	Entomopoxvirinae	NA	NA	NA	NA	NA	NA	NA	NA	NA	NA	NA
21	Poxviridae	Cluster1758	11	UELX01044966.1:539-848(-):Eupelmus_urozonus	Eupelmus_urozonus	UELX01044966.1_539-848_-__Eupelmus_urozonus	UELX01044966.1:Eupelmus_urozonus	NA	NA	NA	0	0	0	NP_064804	NA	102029	UELX01044966.1:Eupelmus_urozonus	NA	0	33	102	63	0	1	102	12	106	3.688e-09	57	192	28321	NA	Amsacta_moorei_entomopoxvirus	Betaentomopoxvirus	Poxviridae	Poxviridae	Viruses	Entomopoxvirinae	NA	NA	NA	NA	NA	NA	NA	NA	NA	NA	NA
373	Poxviridae	Cluster1758	12	scaffold_3268:8088-8565(-):Platygaster_equestris	Platygaster_equestris	scaffold_3268_8088-8565_-__Platygaster_equestris	scaffold_3268:Platygaster_equestris	5	NA	NA	NA	NA	NA	NP_064804	NA	45660	scaffold_3268:Platygaster_equestris	5	4	30.9	135	93	0	4	138	9	143	7.414e-12	67	192	28321	NA	Amsacta_moorei_entomopoxvirus	Betaentomopoxvirus	Poxviridae	Poxviridae	Viruses	Entomopoxvirinae	NA	NA	NA	NA	NA	NA	NA	NA	NA	NA	NA
373	Poxviridae	Cluster1758	12	scaffold_5629:9871-10237(-):Platygaster_orseoliae	Platygaster_orseoliae	scaffold_5629_9871-10237_-__Platygaster_orseoliae	scaffold_5629:Platygaster_orseoliae	4	NA	NA	NA	NA	NA	YP_009001502	NA	54411	scaffold_5629:Platygaster_orseoliae	4	3	34.1	109	67	0	6	114	8	109	4.873e-11	63	182	62099	NA	Anomala_cuprea_entomopoxvirus	Alphaentomopoxvirus	Poxviridae	Poxviridae	Viruses	Entomopoxvirinae	NA	NA	NA	NA	NA	NA	NA	NA	NA	NA	NA
171	Poxviridae	Cluster1758	13	scaffold_1300:2128-2458(+):Platygaster_orseoliae	Platygaster_orseoliae	scaffold_1300_2128-2458_+__Platygaster_orseoliae	scaffold_1300:Platygaster_orseoliae	NA	NA	NA	NA	NA	NA	NP_064804	NA	102062	scaffold_1300:Platygaster_orseoliae	NA	0	32.7	99	65	0	1	97	2	100	3.198e-08	54	192	28321	NA	Amsacta_moorei_entomopoxvirus	Betaentomopoxvirus	Poxviridae	Poxviridae	Viruses	Entomopoxvirinae	NA	NA	NA	NA	NA	NA	NA	NA	NA	NA	NA
171	Poxviridae	Cluster1758	13	scaffold_15159:3215-3560(+):Platygaster_orseoliae	Platygaster_orseoliae	scaffold_15159_3215-3560_+__Platygaster_orseoliae	scaffold_15159:Platygaster_orseoliae	NA	NA	NA	NA	NA	NA	YP_008004125	NA	44373	scaffold_15159:Platygaster_orseoliae	NA	1	34.4	95	60	0	21	115	26	118	7.948e-09	56	196	10288	NA	Choristoneura_biennis_entomopoxvirus	Betaentomopoxvirus	Poxviridae	Poxviridae	Viruses	Entomopoxvirinae	NA	NA	NA	NA	NA	NA	NA	NA	NA	NA	NA
171	Poxviridae	Cluster4844	1	scaffold_5102:8962-11116(+):Platygaster_orseoliae	Platygaster_orseoliae	scaffold_5102_8962-11116_+__Platygaster_orseoliae	scaffold_5102:Platygaster_orseoliae	NA	NA	NA	NA	NA	NA	YP_008003527	NA	54385	scaffold_5102:Platygaster_orseoliae	NA	2	42.5	711	406	0	8	718	3	709	1.747e-162	531	710	1293572	Mythimna_separata_entomopoxvirus_'L'	Mythimna_separata_entomopoxvirus	Betaentomopoxvirus	Poxviridae	Poxviridae	Viruses	Entomopoxvirinae	NA	NA	NA	NA	NA	NA	NA	NA	NA	NA	NA
16	Poxviridae	Cluster1758	14	scaffold_165061:1-223(+):Eupelmus_azureus	Eupelmus_azureus	scaffold_165061_1-223_+__Eupelmus_azureus	scaffold_165061:Eupelmus_azureus	NA	NA	NA	NA	NA	NA	YP_009001502	NA	102327	scaffold_165061:Eupelmus_azureus	NA	0	42.2	66	37	0	9	73	44	109	3.573e-08	52	182	62099	NA	Anomala_cuprea_entomopoxvirus	Alphaentomopoxvirus	Poxviridae	Poxviridae	Viruses	Entomopoxvirinae	NA	NA	NA	NA	NA	NA	NA	NA	NA	NA	NA
314	Poxviridae	Cluster1758	15	JZSA01001576.1:2705-3128(+):Cotesia_vestalis	Cotesia_vestalis	JZSA01001576.1_2705-3128_+__Cotesia_vestalis	JZSA01001576.1:Cotesia_vestalis	5	NA	NA	0	0	0	NP_064804	NA	84658	JZSA01001576.1:Cotesia_vestalis	5	1	34.1	151	92	0	1	141	8	158	1.185e-18	86	192	28321	NA	Amsacta_moorei_entomopoxvirus	Betaentomopoxvirus	Poxviridae	Poxviridae	Viruses	Entomopoxvirinae	NA	NA	NA	NA	NA	NA	NA	NA	NA	NA	NA
314	Poxviridae	Cluster1758	15	JZSA01003378.1_0:3939-4185(-):Cotesia_vestalis	Cotesia_vestalis	JZSA01003378.1_0_3939-4185_-__Cotesia_vestalis	JZSA01003378.1_0:Cotesia_vestalis	5	NA	NA	0	0	0	YP_008003850	NA	7055	JZSA01003378.1_0:Cotesia_vestalis	5	1	41.5	79	44	0	3	81	8	83	6.422e-11	61	185	1293540	Adoxophyes_honmai_entomopoxvirus_'L'	Adoxophyes_honmai_entomopoxvirus	Betaentomopoxvirus	Poxviridae	Poxviridae	Viruses	Entomopoxvirinae	NA	NA	NA	NA	NA	NA	NA	NA	NA	NA	NA
314	Poxviridae	Cluster1758	15	JZSA01005429.1:4968-5175(-):Cotesia_vestalis	Cotesia_vestalis	JZSA01005429.1_4968-5175_-__Cotesia_vestalis	JZSA01005429.1:Cotesia_vestalis	9	NA	NA	0	0	0	YP_008004125	NA	7341	JZSA01005429.1:Cotesia_vestalis	9	5	47	66	33	0	3	68	24	87	6.669e-11	60	196	10288	NA	Choristoneura_biennis_entomopoxvirus	Betaentomopoxvirus	Poxviridae	Poxviridae	Viruses	Entomopoxvirinae	NA	NA	NA	NA	NA	NA	NA	NA	NA	NA	NA
314	Poxviridae	Cluster1758	15	JZSA01005874.1:19678-19939(-):Cotesia_vestalis	Cotesia_vestalis	JZSA01005874.1_19678-19939_-__Cotesia_vestalis	JZSA01005874.1:Cotesia_vestalis	9	NA	NA	0	0	0	YP_008004125	NA	7774	JZSA01005874.1:Cotesia_vestalis	9	2	43.9	85	46	0	1	83	44	128	5.403e-14	70	196	10288	NA	Choristoneura_biennis_entomopoxvirus	Betaentomopoxvirus	Poxviridae	Poxviridae	Viruses	Entomopoxvirinae	NA	NA	NA	NA	NA	NA	NA	NA	NA	NA	NA
314	Poxviridae	Cluster1758	15	JZSA01006053.1:3127-3337(-):Cotesia_vestalis	Cotesia_vestalis	JZSA01006053.1_3127-3337_-__Cotesia_vestalis	JZSA01006053.1:Cotesia_vestalis	NA	NA	NA	0	0	0	YP_008004125	NA	7780	JZSA01006053.1:Cotesia_vestalis	NA	0	49.3	66	32	0	3	68	24	87	3.985e-12	63	196	10288	NA	Choristoneura_biennis_entomopoxvirus	Betaentomopoxvirus	Poxviridae	Poxviridae	Viruses	Entomopoxvirinae	NA	NA	NA	NA	NA	NA	NA	NA	NA	NA	NA
314	Poxviridae	Cluster1758	15	JZSA01006656.1:40-454(+):Cotesia_vestalis	Cotesia_vestalis	JZSA01006656.1_40-454_+__Cotesia_vestalis	JZSA01006656.1:Cotesia_vestalis	5	NA	NA	0	0	0	NP_064804	NA	7791	JZSA01006656.1:Cotesia_vestalis	5	4	31	152	93	0	1	136	11	162	5.133e-15	75	192	28321	NA	Amsacta_moorei_entomopoxvirus	Betaentomopoxvirus	Poxviridae	Poxviridae	Viruses	Entomopoxvirinae	NA	NA	NA	NA	NA	NA	NA	NA	NA	NA	NA
223	Poxviridae	Cluster1758	2	scaffold_32847:102-483(-):Anagyrus_pseudococci	Anagyrus_pseudococci	scaffold_32847_102-483_-__Anagyrus_pseudococci	scaffold_32847:Anagyrus_pseudococci	NA	NA	NA	NA	NA	NA	NP_064804	NA	102283	scaffold_32847:Anagyrus_pseudococci	NA	0	29.5	126	77	0	1	126	4	113	1.844e-09	59	192	28321	NA	Amsacta_moorei_entomopoxvirus	Betaentomopoxvirus	Poxviridae	Poxviridae	Viruses	Entomopoxvirinae	NA	NA	NA	NA	NA	NA	NA	NA	NA	NA	NA
163	Poxviridae	Cluster1758	4	scaffold_56463:237-633(+):Platygaster_equestris	Platygaster_equestris	scaffold_56463_237-633_+__Platygaster_equestris	scaffold_56463:Platygaster_equestris	NA	NA	NA	NA	NA	NA	NP_064804	NA	102110	scaffold_56463:Platygaster_equestris	NA	0	34	127	83	0	6	132	9	135	3.713e-14	72	192	28321	NA	Amsacta_moorei_entomopoxvirus	Betaentomopoxvirus	Poxviridae	Poxviridae	Viruses	Entomopoxvirinae	NA	NA	NA	NA	NA	NA	NA	NA	NA	NA	NA
163	Poxviridae	Cluster1758	5	scaffold_40273:649-1027(+):Platygaster_equestris	Platygaster_equestris	scaffold_40273_649-1027_+__Platygaster_equestris	scaffold_40273:Platygaster_equestris	NA	NA	NA	NA	NA	NA	NP_064804	NA	102119	scaffold_40273:Platygaster_equestris	NA	0	33.7	125	82	0	2	126	7	131	1.431e-13	70	192	28321	NA	Amsacta_moorei_entomopoxvirus	Betaentomopoxvirus	Poxviridae	Poxviridae	Viruses	Entomopoxvirinae	NA	NA	NA	NA	NA	NA	NA	NA	NA	NA	NA
163	Poxviridae	Cluster1758	6	scaffold_40664:743-1040(-):Platygaster_equestris	Platygaster_equestris	scaffold_40664_743-1040_-__Platygaster_equestris	scaffold_40664:Platygaster_equestris	NA	NA	NA	NA	NA	NA	NP_064804	NA	102076	scaffold_40664:Platygaster_equestris	NA	0	34.4	101	64	0	1	99	35	135	3.434e-10	59	192	28321	NA	Amsacta_moorei_entomopoxvirus	Betaentomopoxvirus	Poxviridae	Poxviridae	Viruses	Entomopoxvirinae	NA	NA	NA	NA	NA	NA	NA	NA	NA	NA	NA
307	Poxviridae	Cluster1758	7	scaffold_67360:1997-2324(+):Copidosoma_sp	Copidosoma_sp	scaffold_67360_1997-2324_+__Copidosoma_sp	scaffold_67360:Copidosoma_sp	2	NA	NA	NA	NA	NA	NP_064804	NA	102342	scaffold_67360:Copidosoma_sp	2	0	34.6	95	58	0	1	95	20	108	4.645e-09	57	192	28321	NA	Amsacta_moorei_entomopoxvirus	Betaentomopoxvirus	Poxviridae	Poxviridae	Viruses	Entomopoxvirinae	NA	NA	NA	NA	NA	NA	NA	NA	NA	NA	NA
307	Poxviridae	Cluster26257	1	scaffold_15799:1357-2068(+):Copidosoma_sp	Copidosoma_sp	scaffold_15799_1357-2068_+__Copidosoma_sp	scaffold_15799:Copidosoma_sp	NA	NA	NA	NA	NA	NA	YP_009001555	NA	84153	scaffold_15799:Copidosoma_sp	NA	2	28.2	233	151	0	4	236	12	222	2.403e-21	98	223	62099	NA	Anomala_cuprea_entomopoxvirus	Alphaentomopoxvirus	Poxviridae	Poxviridae	Viruses	Entomopoxvirinae	NA	NA	NA	NA	NA	NA	NA	NA	NA	NA	NA
247	Poxviridae	Cluster1758	8	scaffold_302:250904-251249(+):Trissolcus_brochymenae	Trissolcus_brochymenae	scaffold_302_250904-251249_+__Trissolcus_brochymenae	scaffold_302:Trissolcus_brochymenae	NA	NA	NA	NA	NA	NA	NP_064804	NA	45645	scaffold_302:Trissolcus_brochymenae	NA	42	35.4	94	59	0	1	92	6	99	2.256e-09	58	192	28321	NA	Amsacta_moorei_entomopoxvirus	Betaentomopoxvirus	Poxviridae	Poxviridae	Viruses	Entomopoxvirinae	NA	NA	NA	NA	NA	NA	NA	NA	NA	NA	NA
162	Orthomyxoviridae	Cluster17658	1	scaffold_4286:9981-12255(+):Platygaster_equestris	Platygaster_equestris	scaffold_4286_9981-12255_+__Platygaster_equestris	scaffold_4286:Platygaster_equestris	NA	NA	NA	NA	NA	NA	YP_009508043	NA	54992	scaffold_4286:Platygaster_equestris	NA	1	55.5	740	329	0	19	758	30	769	6.444e-248	781	777	688436	Riboviria	Quaranfil_quaranjavirus	Quaranjavirus	Orthomyxoviridae	Orthomyxoviridae	Viruses	NA	NA	NA	NA	Articulavirales	NA	NA	NA	Insthoviricetes	Polyploviricotina	Negarnaviricota	NA
15	Orthomyxoviridae	Cluster17658	14	UDEW01018392.1:92-1460(-):Eupelmus_annulatus	Eupelmus_annulatus	UDEW01018392.1_92-1460_-__Eupelmus_annulatus	UDEW01018392.1:Eupelmus_annulatus	NA	NA	NA	NA	NA	NA	YP_009110686	NA	113448	UDEW01018392.1:Eupelmus_annulatus	NA	0	38.4	445	271	0	2	442	326	770	2.784e-84	291	770	1566309	Riboviria	Wellfleet_Bay_virus	Quaranjavirus	Orthomyxoviridae	Orthomyxoviridae	Viruses	NA	NA	NA	NA	Articulavirales	NA	NA	NA	Insthoviricetes	Polyploviricotina	Negarnaviricota	NA
159	Orthomyxoviridae	Cluster17658	2	MPJT01000349.1:20741-21770(-):Osmia_bicornis	Osmia_bicornis	MPJT01000349.1_20741-21770_-__Osmia_bicornis	MPJT01000349.1:Osmia_bicornis	18	NA	NA	2	27.4306	27.4306	YP_009110686	NA	11540	MPJT01000349.1:Osmia_bicornis	18	14	37.1	343	211	0	1	343	6	341	1.284e-59	214	770	1566309	Riboviria	Wellfleet_Bay_virus	Quaranjavirus	Orthomyxoviridae	Orthomyxoviridae	Viruses	NA	NA	NA	NA	Articulavirales	NA	NA	NA	Insthoviricetes	Polyploviricotina	Negarnaviricota	NA
159	Orthomyxoviridae	Cluster17658	8	MPJT01001439.1:8211-10258(-):Osmia_bicornis	Osmia_bicornis	MPJT01001439.1_8211-10258_-__Osmia_bicornis	MPJT01001439.1:Osmia_bicornis	6	NA	NA	32	220.731	220.731	YP_009665204	NA	11597	MPJT01001439.1:Osmia_bicornis	6	0	41.4	654	379	0	1	654	5	652	1.282e-142	471	777	688437	Riboviria	Johnston_Atoll_quaranjavirus	Quaranjavirus	Orthomyxoviridae	Orthomyxoviridae	Viruses	NA	NA	NA	NA	Articulavirales	NA	NA	NA	Insthoviricetes	Polyploviricotina	Negarnaviricota	NA
255	Baculoviridae	Cluster17683	1	scaffold_429:81601-83110(-):Venturia_canescens	Venturia_canescens	scaffold_429_81601-83110_-__Venturia_canescens	scaffold_429:Venturia_canescens	NA	NA	NA	51	13828.3	13828.3	YP_003422399	NA	45722	scaffold_429:Venturia_canescens	NA	8	35.5	506	319	0	5	499	26	531	6.004e-85	295	692	36355	Pseudalatia_unipuncta_granulovirus	Mythimna_unipuncta_granulovirus_A	Betabaculovirus	Baculoviridae	Baculoviridae	Viruses	NA	NA	NA	NA	NA	NA	NA	NA	NA	NA	NA	NA
54	Apis_filamentous-like	Cluster17704	11	QANH01000025.1:252064-252340(+):Harpegnathos_saltator	Harpegnathos_saltator	QANH01000025.1_252064-252340_+__Harpegnathos_saltator	QANH01000025.1:Harpegnathos_saltator	40	NA	NA	NA	NA	NA	YP_009165839	NA	25241	QANH01000025.1:Harpegnathos_saltator	40	61	47	98	48	0	2	92	180	277	5.897e-20	87	279	1100043	unclassified_viruses	Apis_mellifera_filamentous_virus	NA	Apis_filamentous-like	Apis_filamentous-like	Viruses	NA	NA	NA	NA	NA	NA	NA	NA	NA	NA	NA	NA
54	Apis_filamentous-like	Cluster17704	11	QANH01000030.1:135071-135503(-):Harpegnathos_saltator	Harpegnathos_saltator	QANH01000030.1_135071-135503_-__Harpegnathos_saltator	QANH01000030.1:Harpegnathos_saltator	475	NA	NA	NA	NA	NA	YP_009165839	NA	25724	QANH01000030.1:Harpegnathos_saltator	475	176	39.6	149	86	0	2	144	129	277	6.864e-25	104	279	1100043	unclassified_viruses	Apis_mellifera_filamentous_virus	NA	Apis_filamentous-like	Apis_filamentous-like	Viruses	NA	NA	NA	NA	NA	NA	NA	NA	NA	NA	NA	NA
54	Apis_filamentous-like	Cluster17704	11	QANH01000030.1:4418-4910(+):Harpegnathos_saltator	Harpegnathos_saltator	QANH01000030.1_4418-4910_+__Harpegnathos_saltator	QANH01000030.1:Harpegnathos_saltator	475	NA	NA	NA	NA	NA	YP_009165839	NA	25709	QANH01000030.1:Harpegnathos_saltator	475	176	40.3	160	95	0	5	164	118	277	4.25e-28	114	279	1100043	unclassified_viruses	Apis_mellifera_filamentous_virus	NA	Apis_filamentous-like	Apis_filamentous-like	Viruses	NA	NA	NA	NA	NA	NA	NA	NA	NA	NA	NA	NA
54	Apis_filamentous-like	Cluster17704	11	QANH01000036.1:154602-155031(+):Harpegnathos_saltator	Harpegnathos_saltator	QANH01000036.1_154602-155031_+__Harpegnathos_saltator	QANH01000036.1:Harpegnathos_saltator	95	NA	NA	NA	NA	NA	YP_009165839	NA	25996	QANH01000036.1:Harpegnathos_saltator	95	68	36.1	143	91	0	1	143	98	240	1.938e-19	88	279	1100043	unclassified_viruses	Apis_mellifera_filamentous_virus	NA	Apis_filamentous-like	Apis_filamentous-like	Viruses	NA	NA	NA	NA	NA	NA	NA	NA	NA	NA	NA	NA
54	Apis_filamentous-like	Cluster17704	11	QANH01000036.1:164772-165201(+):Harpegnathos_saltator	Harpegnathos_saltator	QANH01000036.1_164772-165201_+__Harpegnathos_saltator	QANH01000036.1:Harpegnathos_saltator	95	NA	NA	NA	NA	NA	YP_009165839	NA	25997	QANH01000036.1:Harpegnathos_saltator	95	68	36.1	143	91	0	1	143	98	240	1.938e-19	88	279	1100043	unclassified_viruses	Apis_mellifera_filamentous_virus	NA	Apis_filamentous-like	Apis_filamentous-like	Viruses	NA	NA	NA	NA	NA	NA	NA	NA	NA	NA	NA	NA
54	Apis_filamentous-like	Cluster17704	11	QANH01000038.1:188354-188744(-):Harpegnathos_saltator	Harpegnathos_saltator	QANH01000038.1_188354-188744_-__Harpegnathos_saltator	QANH01000038.1:Harpegnathos_saltator	79	NA	NA	NA	NA	NA	YP_009165839	NA	26081	QANH01000038.1:Harpegnathos_saltator	79	102	39.6	130	77	0	1	130	150	277	9.347e-21	91	279	1100043	unclassified_viruses	Apis_mellifera_filamentous_virus	NA	Apis_filamentous-like	Apis_filamentous-like	Viruses	NA	NA	NA	NA	NA	NA	NA	NA	NA	NA	NA	NA
54	Apis_filamentous-like	Cluster17704	11	QANH01000051.1:320159-320432(+):Harpegnathos_saltator	Harpegnathos_saltator	QANH01000051.1_320159-320432_+__Harpegnathos_saltator	QANH01000051.1:Harpegnathos_saltator	538	NA	NA	NA	NA	NA	YP_009165839	NA	26610	QANH01000051.1:Harpegnathos_saltator	538	194	47.9	73	37	0	1	73	169	240	4.328e-13	67	279	1100043	unclassified_viruses	Apis_mellifera_filamentous_virus	NA	Apis_filamentous-like	Apis_filamentous-like	Viruses	NA	NA	NA	NA	NA	NA	NA	NA	NA	NA	NA	NA
54	Apis_filamentous-like	Cluster17704	11	QANH01000051.1:66473-66827(-):Harpegnathos_saltator	Harpegnathos_saltator	QANH01000051.1_66473-66827_-__Harpegnathos_saltator	QANH01000051.1:Harpegnathos_saltator	538	NA	NA	NA	NA	NA	YP_009165839	NA	26621	QANH01000051.1:Harpegnathos_saltator	538	194	45.2	122	64	0	1	118	119	240	1.121e-24	102	279	1100043	unclassified_viruses	Apis_mellifera_filamentous_virus	NA	Apis_filamentous-like	Apis_filamentous-like	Viruses	NA	NA	NA	NA	NA	NA	NA	NA	NA	NA	NA	NA
54	Apis_filamentous-like	Cluster17704	11	QANH01000051.1:78901-79258(-):Harpegnathos_saltator	Harpegnathos_saltator	QANH01000051.1_78901-79258_-__Harpegnathos_saltator	QANH01000051.1:Harpegnathos_saltator	538	NA	NA	NA	NA	NA	YP_009165839	NA	26614	QANH01000051.1:Harpegnathos_saltator	538	194	46.5	122	63	0	2	119	119	240	4.966e-26	106	279	1100043	unclassified_viruses	Apis_mellifera_filamentous_virus	NA	Apis_filamentous-like	Apis_filamentous-like	Viruses	NA	NA	NA	NA	NA	NA	NA	NA	NA	NA	NA	NA
54	Apis_filamentous-like	Cluster17704	11	QANH01000058.1:78112-78586(+):Harpegnathos_saltator	Harpegnathos_saltator	QANH01000058.1_78112-78586_+__Harpegnathos_saltator	QANH01000058.1:Harpegnathos_saltator	41	NA	NA	NA	NA	NA	YP_009165839	NA	26675	QANH01000058.1:Harpegnathos_saltator	41	42	39.9	160	94	0	2	158	118	277	1.18e-27	113	279	1100043	unclassified_viruses	Apis_mellifera_filamentous_virus	NA	Apis_filamentous-like	Apis_filamentous-like	Viruses	NA	NA	NA	NA	NA	NA	NA	NA	NA	NA	NA	NA
54	Apis_filamentous-like	Cluster17704	11	QANH01000065.1:30872-31325(+):Harpegnathos_saltator	Harpegnathos_saltator	QANH01000065.1_30872-31325_+__Harpegnathos_saltator	QANH01000065.1:Harpegnathos_saltator	47	NA	NA	NA	NA	NA	YP_009165839	NA	26703	QANH01000065.1:Harpegnathos_saltator	47	61	37.5	157	94	0	1	151	119	275	5.992e-24	102	279	1100043	unclassified_viruses	Apis_mellifera_filamentous_virus	NA	Apis_filamentous-like	Apis_filamentous-like	Viruses	NA	NA	NA	NA	NA	NA	NA	NA	NA	NA	NA	NA
54	Apis_filamentous-like	Cluster17704	11	QANH01000067.1:27096-27560(+):Harpegnathos_saltator	Harpegnathos_saltator	QANH01000067.1_27096-27560_+__Harpegnathos_saltator	QANH01000067.1:Harpegnathos_saltator	370	NA	NA	NA	NA	NA	YP_009165839	NA	26831	QANH01000067.1:Harpegnathos_saltator	370	142	37.8	88	52	0	1	88	120	203	2.33e-09	59	279	1100043	unclassified_viruses	Apis_mellifera_filamentous_virus	NA	Apis_filamentous-like	Apis_filamentous-like	Viruses	NA	NA	NA	NA	NA	NA	NA	NA	NA	NA	NA	NA
54	Apis_filamentous-like	Cluster17704	11	QANH01000079.1:115211-115514(-):Harpegnathos_saltator	Harpegnathos_saltator	QANH01000079.1_115211-115514_-__Harpegnathos_saltator	QANH01000079.1:Harpegnathos_saltator	18	NA	NA	NA	NA	NA	YP_009165839	NA	27331	QANH01000079.1:Harpegnathos_saltator	18	23	39.3	101	58	0	1	101	118	214	2.798e-14	71	279	1100043	unclassified_viruses	Apis_mellifera_filamentous_virus	NA	Apis_filamentous-like	Apis_filamentous-like	Viruses	NA	NA	NA	NA	NA	NA	NA	NA	NA	NA	NA	NA
54	Apis_filamentous-like	Cluster17704	11	QANH01000121.1:55345-55828(-):Harpegnathos_saltator	Harpegnathos_saltator	QANH01000121.1_55345-55828_-__Harpegnathos_saltator	QANH01000121.1:Harpegnathos_saltator	11	NA	NA	NA	NA	NA	YP_009165839	NA	28126	QANH01000121.1:Harpegnathos_saltator	11	15	37.6	160	99	0	2	161	118	277	1.338e-24	104	279	1100043	unclassified_viruses	Apis_mellifera_filamentous_virus	NA	Apis_filamentous-like	Apis_filamentous-like	Viruses	NA	NA	NA	NA	NA	NA	NA	NA	NA	NA	NA	NA
54	Apis_filamentous-like	Cluster17704	11	QANH01000124.1:109280-109751(+):Harpegnathos_saltator	Harpegnathos_saltator	QANH01000124.1_109280-109751_+__Harpegnathos_saltator	QANH01000124.1:Harpegnathos_saltator	37	NA	NA	NA	NA	NA	YP_009165839	NA	28252	QANH01000124.1:Harpegnathos_saltator	37	29	41	157	89	0	7	157	119	275	2.352e-28	115	279	1100043	unclassified_viruses	Apis_mellifera_filamentous_virus	NA	Apis_filamentous-like	Apis_filamentous-like	Viruses	NA	NA	NA	NA	NA	NA	NA	NA	NA	NA	NA	NA
54	Apis_filamentous-like	Cluster17704	11	QANH01000138.1:143865-144252(-):Harpegnathos_saltator	Harpegnathos_saltator	QANH01000138.1_143865-144252_-__Harpegnathos_saltator	QANH01000138.1:Harpegnathos_saltator	81	NA	NA	NA	NA	NA	YP_009165839	NA	28856	QANH01000138.1:Harpegnathos_saltator	81	54	42.2	133	74	0	1	129	119	251	2.457e-24	102	279	1100043	unclassified_viruses	Apis_mellifera_filamentous_virus	NA	Apis_filamentous-like	Apis_filamentous-like	Viruses	NA	NA	NA	NA	NA	NA	NA	NA	NA	NA	NA	NA
54	Apis_filamentous-like	Cluster17704	11	QANH01000138.1:262791-263004(-):Harpegnathos_saltator	Harpegnathos_saltator	QANH01000138.1_262791-263004_-__Harpegnathos_saltator	QANH01000138.1:Harpegnathos_saltator	81	NA	NA	NA	NA	NA	YP_009165839	NA	28862	QANH01000138.1:Harpegnathos_saltator	81	54	41.6	75	41	0	1	71	203	277	3.602e-10	58	279	1100043	unclassified_viruses	Apis_mellifera_filamentous_virus	NA	Apis_filamentous-like	Apis_filamentous-like	Viruses	NA	NA	NA	NA	NA	NA	NA	NA	NA	NA	NA	NA
54	Apis_filamentous-like	Cluster17704	11	QANH01000151.1:39602-39959(-):Harpegnathos_saltator	Harpegnathos_saltator	QANH01000151.1_39602-39959_-__Harpegnathos_saltator	QANH01000151.1:Harpegnathos_saltator	24	NA	NA	NA	NA	NA	YP_009165839	NA	29098	QANH01000151.1:Harpegnathos_saltator	24	13	39.8	119	70	0	1	119	118	234	1.274e-18	85	279	1100043	unclassified_viruses	Apis_mellifera_filamentous_virus	NA	Apis_filamentous-like	Apis_filamentous-like	Viruses	NA	NA	NA	NA	NA	NA	NA	NA	NA	NA	NA	NA
54	Apis_filamentous-like	Cluster17704	11	QANH01000163.1:15767-16436(+):Harpegnathos_saltator	Harpegnathos_saltator	QANH01000163.1_15767-16436_+__Harpegnathos_saltator	QANH01000163.1:Harpegnathos_saltator	2	NA	NA	NA	NA	NA	YP_009165839	NA	29142	QANH01000163.1:Harpegnathos_saltator	2	4	38.9	161	97	0	63	223	118	277	1.472e-25	109	279	1100043	unclassified_viruses	Apis_mellifera_filamentous_virus	NA	Apis_filamentous-like	Apis_filamentous-like	Viruses	NA	NA	NA	NA	NA	NA	NA	NA	NA	NA	NA	NA
54	Apis_filamentous-like	Cluster17704	11	QANH01000169.1:665981-666491(-):Harpegnathos_saltator	Harpegnathos_saltator	QANH01000169.1_665981-666491_-__Harpegnathos_saltator	QANH01000169.1:Harpegnathos_saltator	53	NA	NA	NA	NA	NA	YP_009165839	NA	29449	QANH01000169.1:Harpegnathos_saltator	53	65	31	191	117	0	1	170	45	235	8.859e-21	93	279	1100043	unclassified_viruses	Apis_mellifera_filamentous_virus	NA	Apis_filamentous-like	Apis_filamentous-like	Viruses	NA	NA	NA	NA	NA	NA	NA	NA	NA	NA	NA	NA
54	Apis_filamentous-like	Cluster17704	11	QANH01000247.1:54768-55113(-):Harpegnathos_saltator	Harpegnathos_saltator	QANH01000247.1_54768-55113_-__Harpegnathos_saltator	QANH01000247.1:Harpegnathos_saltator	32	NA	NA	NA	NA	NA	YP_009165839	NA	30271	QANH01000247.1:Harpegnathos_saltator	32	23	38.8	115	69	0	1	115	118	230	8.99e-17	79	279	1100043	unclassified_viruses	Apis_mellifera_filamentous_virus	NA	Apis_filamentous-like	Apis_filamentous-like	Viruses	NA	NA	NA	NA	NA	NA	NA	NA	NA	NA	NA	NA
54	Apis_filamentous-like	Cluster17704	11	QANH01000261.1:3734-4307(+):Harpegnathos_saltator	Harpegnathos_saltator	QANH01000261.1_3734-4307_+__Harpegnathos_saltator	QANH01000261.1:Harpegnathos_saltator	116	NA	NA	NA	NA	NA	YP_009165839	NA	30472	QANH01000261.1:Harpegnathos_saltator	116	35	35.9	158	100	0	35	191	118	275	1.496e-21	96	279	1100043	unclassified_viruses	Apis_mellifera_filamentous_virus	NA	Apis_filamentous-like	Apis_filamentous-like	Viruses	NA	NA	NA	NA	NA	NA	NA	NA	NA	NA	NA	NA
54	Apis_filamentous-like	Cluster17704	11	QANH01000263.1:95100-95724(-):Harpegnathos_saltator	Harpegnathos_saltator	QANH01000263.1_95100-95724_-__Harpegnathos_saltator	QANH01000263.1:Harpegnathos_saltator	17	NA	NA	NA	NA	NA	YP_009165839	NA	30500	QANH01000263.1:Harpegnathos_saltator	17	15	33	231	139	0	1	208	45	275	2.218e-30	123	279	1100043	unclassified_viruses	Apis_mellifera_filamentous_virus	NA	Apis_filamentous-like	Apis_filamentous-like	Viruses	NA	NA	NA	NA	NA	NA	NA	NA	NA	NA	NA	NA
54	Apis_filamentous-like	Cluster17704	11	QANH01000268.1:342828-343320(-):Harpegnathos_saltator	Harpegnathos_saltator	QANH01000268.1_342828-343320_-__Harpegnathos_saltator	QANH01000268.1:Harpegnathos_saltator	235	NA	NA	NA	NA	NA	YP_009165839	NA	30536	QANH01000268.1:Harpegnathos_saltator	235	88	40.6	160	94	0	5	164	118	277	1.655e-28	115	279	1100043	unclassified_viruses	Apis_mellifera_filamentous_virus	NA	Apis_filamentous-like	Apis_filamentous-like	Viruses	NA	NA	NA	NA	NA	NA	NA	NA	NA	NA	NA	NA
54	Apis_filamentous-like	Cluster17704	11	QANH01000271.1:54181-54643(-):Harpegnathos_saltator	Harpegnathos_saltator	QANH01000271.1_54181-54643_-__Harpegnathos_saltator	QANH01000271.1:Harpegnathos_saltator	15	NA	NA	NA	NA	NA	YP_009165839	NA	30562	QANH01000271.1:Harpegnathos_saltator	15	10	41	159	90	0	2	154	119	277	5.919e-29	116	279	1100043	unclassified_viruses	Apis_mellifera_filamentous_virus	NA	Apis_filamentous-like	Apis_filamentous-like	Viruses	NA	NA	NA	NA	NA	NA	NA	NA	NA	NA	NA	NA
54	Apis_filamentous-like	Cluster17704	11	QANH01000364.1:26283-26553(+):Harpegnathos_saltator	Harpegnathos_saltator	QANH01000364.1_26283-26553_+__Harpegnathos_saltator	QANH01000364.1:Harpegnathos_saltator	134	NA	NA	NA	NA	NA	YP_009165839	NA	31174	QANH01000364.1:Harpegnathos_saltator	134	61	45.2	91	47	0	4	90	185	275	1.491e-16	77	279	1100043	unclassified_viruses	Apis_mellifera_filamentous_virus	NA	Apis_filamentous-like	Apis_filamentous-like	Viruses	NA	NA	NA	NA	NA	NA	NA	NA	NA	NA	NA	NA
54	Apis_filamentous-like	Cluster17704	11	QANH01000364.1:80890-81289(+):Harpegnathos_saltator	Harpegnathos_saltator	QANH01000364.1_80890-81289_+__Harpegnathos_saltator	QANH01000364.1:Harpegnathos_saltator	134	NA	NA	NA	NA	NA	YP_009165839	NA	31163	QANH01000364.1:Harpegnathos_saltator	134	61	41.1	128	68	0	6	122	120	247	8.473e-22	94	279	1100043	unclassified_viruses	Apis_mellifera_filamentous_virus	NA	Apis_filamentous-like	Apis_filamentous-like	Viruses	NA	NA	NA	NA	NA	NA	NA	NA	NA	NA	NA	NA
54	Apis_filamentous-like	Cluster17704	11	QANH01000365.1:237458-238013(-):Harpegnathos_saltator	Harpegnathos_saltator	QANH01000365.1_237458-238013_-__Harpegnathos_saltator	QANH01000365.1:Harpegnathos_saltator	180	NA	NA	NA	NA	NA	YP_009165839	NA	31185	QANH01000365.1:Harpegnathos_saltator	180	98	38.9	160	97	0	26	185	118	277	7.566e-26	109	279	1100043	unclassified_viruses	Apis_mellifera_filamentous_virus	NA	Apis_filamentous-like	Apis_filamentous-like	Viruses	NA	NA	NA	NA	NA	NA	NA	NA	NA	NA	NA	NA
54	Apis_filamentous-like	Cluster17704	11	QANH01000368.1:50134-50596(+):Harpegnathos_saltator	Harpegnathos_saltator	QANH01000368.1_50134-50596_+__Harpegnathos_saltator	QANH01000368.1:Harpegnathos_saltator	50	NA	NA	NA	NA	NA	YP_009165839	NA	31299	QANH01000368.1:Harpegnathos_saltator	50	41	41	159	90	0	2	154	119	277	5.919e-29	116	279	1100043	unclassified_viruses	Apis_mellifera_filamentous_virus	NA	Apis_filamentous-like	Apis_filamentous-like	Viruses	NA	NA	NA	NA	NA	NA	NA	NA	NA	NA	NA	NA
54	Apis_filamentous-like	Cluster17704	11	QANH01000436.1:121985-122441(-):Harpegnathos_saltator	Harpegnathos_saltator	QANH01000436.1_121985-122441_-__Harpegnathos_saltator	QANH01000436.1:Harpegnathos_saltator	56	NA	NA	NA	NA	NA	YP_009165839	NA	31807	QANH01000436.1:Harpegnathos_saltator	56	33	42	157	87	0	2	152	119	275	8.248e-30	119	279	1100043	unclassified_viruses	Apis_mellifera_filamentous_virus	NA	Apis_filamentous-like	Apis_filamentous-like	Viruses	NA	NA	NA	NA	NA	NA	NA	NA	NA	NA	NA	NA
54	Apis_filamentous-like	Cluster17704	11	QANH01000436.1:25255-25657(+):Harpegnathos_saltator	Harpegnathos_saltator	QANH01000436.1_25255-25657_+__Harpegnathos_saltator	QANH01000436.1:Harpegnathos_saltator	56	NA	NA	NA	NA	NA	YP_009165839	NA	31822	QANH01000436.1:Harpegnathos_saltator	56	33	37.5	141	83	0	1	134	132	272	8.013e-21	92	279	1100043	unclassified_viruses	Apis_mellifera_filamentous_virus	NA	Apis_filamentous-like	Apis_filamentous-like	Viruses	NA	NA	NA	NA	NA	NA	NA	NA	NA	NA	NA	NA
54	Apis_filamentous-like	Cluster17704	11	QANH01000479.1:27088-27301(+):Harpegnathos_saltator	Harpegnathos_saltator	QANH01000479.1_27088-27301_+__Harpegnathos_saltator	QANH01000479.1:Harpegnathos_saltator	4	NA	NA	NA	NA	NA	YP_009165839	NA	32266	QANH01000479.1:Harpegnathos_saltator	4	7	41.6	75	41	0	1	71	203	277	3.602e-10	58	279	1100043	unclassified_viruses	Apis_mellifera_filamentous_virus	NA	Apis_filamentous-like	Apis_filamentous-like	Viruses	NA	NA	NA	NA	NA	NA	NA	NA	NA	NA	NA	NA
54	Apis_filamentous-like	Cluster17704	11	QANH01000501.1:15252-15783(+):Harpegnathos_saltator	Harpegnathos_saltator	QANH01000501.1_15252-15783_+__Harpegnathos_saltator	QANH01000501.1:Harpegnathos_saltator	8	NA	NA	NA	NA	NA	YP_009165839	NA	32282	QANH01000501.1:Harpegnathos_saltator	8	3	40.2	153	91	0	24	176	118	270	4.13e-26	109	279	1100043	unclassified_viruses	Apis_mellifera_filamentous_virus	NA	Apis_filamentous-like	Apis_filamentous-like	Viruses	NA	NA	NA	NA	NA	NA	NA	NA	NA	NA	NA	NA
54	Apis_filamentous-like	Cluster17704	11	QANH01000646.1:12867-13128(-):Harpegnathos_saltator	Harpegnathos_saltator	QANH01000646.1_12867-13128_-__Harpegnathos_saltator	QANH01000646.1:Harpegnathos_saltator	6	NA	NA	NA	NA	NA	YP_009165839	NA	33259	QANH01000646.1:Harpegnathos_saltator	6	3	43.7	91	48	0	1	87	180	270	1.647e-15	74	279	1100043	unclassified_viruses	Apis_mellifera_filamentous_virus	NA	Apis_filamentous-like	Apis_filamentous-like	Viruses	NA	NA	NA	NA	NA	NA	NA	NA	NA	NA	NA	NA
54	Apis_filamentous-like	Cluster17704	11	QANH01000661.1_2-HSPs_+__Harpegnathos_saltator	Harpegnathos_saltator	QANH01000661.1_2-HSPs_+__Harpegnathos_saltator	QANH01000661.1:Harpegnathos_saltator	NA	NA	NA	NA	NA	NA	YP_009165839	NA	33268	QANH01000661.1:Harpegnathos_saltator	NA	7	43.1	73	39	0	1	69	203	275	1.261e-10	59	279	1100043	unclassified_viruses	Apis_mellifera_filamentous_virus	NA	Apis_filamentous-like	Apis_filamentous-like	Viruses	NA	NA	NA	NA	NA	NA	NA	NA	NA	NA	NA	NA
54	Apis_filamentous-like	Cluster17704	11	QANH01000754.1:113190-113763(+):Harpegnathos_saltator	Harpegnathos_saltator	QANH01000754.1_113190-113763_+__Harpegnathos_saltator	QANH01000754.1:Harpegnathos_saltator	85	NA	NA	NA	NA	NA	YP_009165839	NA	34217	QANH01000754.1:Harpegnathos_saltator	85	20	35.9	158	100	0	35	191	118	275	1.496e-21	96	279	1100043	unclassified_viruses	Apis_mellifera_filamentous_virus	NA	Apis_filamentous-like	Apis_filamentous-like	Viruses	NA	NA	NA	NA	NA	NA	NA	NA	NA	NA	NA	NA
54	Apis_filamentous-like	Cluster17704	11	QANH01000775.1:12937-13333(+):Harpegnathos_saltator	Harpegnathos_saltator	QANH01000775.1_12937-13333_+__Harpegnathos_saltator	QANH01000775.1:Harpegnathos_saltator	113	NA	NA	NA	NA	NA	YP_009165839	NA	34550	QANH01000775.1:Harpegnathos_saltator	113	41	39.9	117	67	0	12	123	148	264	5.531e-18	83	279	1100043	unclassified_viruses	Apis_mellifera_filamentous_virus	NA	Apis_filamentous-like	Apis_filamentous-like	Viruses	NA	NA	NA	NA	NA	NA	NA	NA	NA	NA	NA	NA
54	Apis_filamentous-like	Cluster17704	11	QANH01000814.1:265304-265745(-):Harpegnathos_saltator	Harpegnathos_saltator	QANH01000814.1_265304-265745_-__Harpegnathos_saltator	QANH01000814.1:Harpegnathos_saltator	244	NA	NA	NA	NA	NA	YP_009165839	NA	34770	QANH01000814.1:Harpegnathos_saltator	244	75	36.1	147	93	0	1	147	118	264	3.423e-20	91	279	1100043	unclassified_viruses	Apis_mellifera_filamentous_virus	NA	Apis_filamentous-like	Apis_filamentous-like	Viruses	NA	NA	NA	NA	NA	NA	NA	NA	NA	NA	NA	NA
54	Apis_filamentous-like	Cluster17704	11	QANH01000825.1:94088-94541(-):Harpegnathos_saltator	Harpegnathos_saltator	QANH01000825.1_94088-94541_-__Harpegnathos_saltator	QANH01000825.1:Harpegnathos_saltator	13	NA	NA	NA	NA	NA	YP_009165839	NA	34966	QANH01000825.1:Harpegnathos_saltator	13	16	41.4	157	88	0	1	151	119	275	5.24e-29	116	279	1100043	unclassified_viruses	Apis_mellifera_filamentous_virus	NA	Apis_filamentous-like	Apis_filamentous-like	Viruses	NA	NA	NA	NA	NA	NA	NA	NA	NA	NA	NA	NA
54	Apis_filamentous-like	Cluster17704	12	QANH01000041.1:181486-181977(-):Harpegnathos_saltator	Harpegnathos_saltator	QANH01000041.1_181486-181977_-__Harpegnathos_saltator	QANH01000041.1:Harpegnathos_saltator	25	NA	NA	NA	NA	NA	YP_009165839	NA	26216	QANH01000041.1:Harpegnathos_saltator	25	22	36	106	63	0	1	106	120	219	1.558e-11	66	279	1100043	unclassified_viruses	Apis_mellifera_filamentous_virus	NA	Apis_filamentous-like	Apis_filamentous-like	Viruses	NA	NA	NA	NA	NA	NA	NA	NA	NA	NA	NA	NA
54	Apis_filamentous-like	Cluster17704	12	QANH01000041.1:195240-195900(-):Harpegnathos_saltator	Harpegnathos_saltator	QANH01000041.1_195240-195900_-__Harpegnathos_saltator	QANH01000041.1:Harpegnathos_saltator	25	NA	NA	NA	NA	NA	YP_009165839	NA	26193	QANH01000041.1:Harpegnathos_saltator	25	22	39.8	149	87	0	57	205	120	264	5.558e-24	105	279	1100043	unclassified_viruses	Apis_mellifera_filamentous_virus	NA	Apis_filamentous-like	Apis_filamentous-like	Viruses	NA	NA	NA	NA	NA	NA	NA	NA	NA	NA	NA	NA
54	Apis_filamentous-like	Cluster17704	12	QANH01000071.1:980-1274(+):Harpegnathos_saltator	Harpegnathos_saltator	QANH01000071.1_980-1274_+__Harpegnathos_saltator	QANH01000071.1:Harpegnathos_saltator	6	NA	NA	NA	NA	NA	YP_009165839	NA	26934	QANH01000071.1:Harpegnathos_saltator	6	9	44.5	85	44	0	7	87	180	264	3.38e-14	71	279	1100043	unclassified_viruses	Apis_mellifera_filamentous_virus	NA	Apis_filamentous-like	Apis_filamentous-like	Viruses	NA	NA	NA	NA	NA	NA	NA	NA	NA	NA	NA	NA
54	Apis_filamentous-like	Cluster17704	12	QANH01000103.1:25703-25988(+):Harpegnathos_saltator	Harpegnathos_saltator	QANH01000103.1_25703-25988_+__Harpegnathos_saltator	QANH01000103.1:Harpegnathos_saltator	15	NA	NA	NA	NA	NA	YP_009165839	NA	27788	QANH01000103.1:Harpegnathos_saltator	15	11	37.1	95	55	0	1	95	120	207	3.169e-11	62	279	1100043	unclassified_viruses	Apis_mellifera_filamentous_virus	NA	Apis_filamentous-like	Apis_filamentous-like	Viruses	NA	NA	NA	NA	NA	NA	NA	NA	NA	NA	NA	NA
54	Apis_filamentous-like	Cluster17704	12	QANH01000154.1:66178-66454(+):Harpegnathos_saltator	Harpegnathos_saltator	QANH01000154.1_66178-66454_+__Harpegnathos_saltator	QANH01000154.1:Harpegnathos_saltator	34	NA	NA	NA	NA	NA	YP_009165839	NA	29101	QANH01000154.1:Harpegnathos_saltator	34	20	38.1	92	50	0	1	92	127	207	2.032e-11	63	279	1100043	unclassified_viruses	Apis_mellifera_filamentous_virus	NA	Apis_filamentous-like	Apis_filamentous-like	Viruses	NA	NA	NA	NA	NA	NA	NA	NA	NA	NA	NA	NA
54	Apis_filamentous-like	Cluster17704	12	QANH01000162.1:277350-278025(-):Harpegnathos_saltator	Harpegnathos_saltator	QANH01000162.1_277350-278025_-__Harpegnathos_saltator	QANH01000162.1:Harpegnathos_saltator	119	NA	NA	NA	NA	NA	YP_009165839	NA	29122	QANH01000162.1:Harpegnathos_saltator	119	64	38.3	154	89	0	57	210	120	264	3.056e-23	103	279	1100043	unclassified_viruses	Apis_mellifera_filamentous_virus	NA	Apis_filamentous-like	Apis_filamentous-like	Viruses	NA	NA	NA	NA	NA	NA	NA	NA	NA	NA	NA	NA
54	Apis_filamentous-like	Cluster17704	12	QANH01000162.1:291464-291743(-):Harpegnathos_saltator	Harpegnathos_saltator	QANH01000162.1_291464-291743_-__Harpegnathos_saltator	QANH01000162.1:Harpegnathos_saltator	119	NA	NA	NA	NA	NA	YP_009165839	NA	29107	QANH01000162.1:Harpegnathos_saltator	119	64	48.5	91	45	0	1	88	174	264	5.675e-19	84	279	1100043	unclassified_viruses	Apis_mellifera_filamentous_virus	NA	Apis_filamentous-like	Apis_filamentous-like	Viruses	NA	NA	NA	NA	NA	NA	NA	NA	NA	NA	NA	NA
54	Apis_filamentous-like	Cluster17704	12	QANH01000187.1:55432-56116(-):Harpegnathos_saltator	Harpegnathos_saltator	QANH01000187.1_55432-56116_-__Harpegnathos_saltator	QANH01000187.1:Harpegnathos_saltator	19	NA	NA	NA	NA	NA	YP_009165839	NA	29826	QANH01000187.1:Harpegnathos_saltator	19	29	36.8	157	91	0	57	213	120	264	5.41e-22	99	279	1100043	unclassified_viruses	Apis_mellifera_filamentous_virus	NA	Apis_filamentous-like	Apis_filamentous-like	Viruses	NA	NA	NA	NA	NA	NA	NA	NA	NA	NA	NA	NA
54	Apis_filamentous-like	Cluster17704	12	QANH01000263.1:19542-19989(+):Harpegnathos_saltator	Harpegnathos_saltator	QANH01000263.1_19542-19989_+__Harpegnathos_saltator	QANH01000263.1:Harpegnathos_saltator	17	NA	NA	NA	NA	NA	YP_009165839	NA	30510	QANH01000263.1:Harpegnathos_saltator	17	15	38.6	134	79	0	1	134	135	264	2.697e-20	91	279	1100043	unclassified_viruses	Apis_mellifera_filamentous_virus	NA	Apis_filamentous-like	Apis_filamentous-like	Viruses	NA	NA	NA	NA	NA	NA	NA	NA	NA	NA	NA	NA
54	Apis_filamentous-like	Cluster17704	12	QANH01000263.1:41647-41920(+):Harpegnathos_saltator	Harpegnathos_saltator	QANH01000263.1_41647-41920_+__Harpegnathos_saltator	QANH01000263.1:Harpegnathos_saltator	17	NA	NA	NA	NA	NA	YP_009552661	NA	30484	QANH01000263.1:Harpegnathos_saltator	17	15	37	78	46	0	18	91	122	199	1.402e-07	51	201	1046267	NA	Operophtera_brumata_nucleopolyhedrovirus	Alphabaculovirus	Baculoviridae	Apis_filamentous-like	Viruses	NA	NA	NA	NA	NA	NA	NA	NA	NA	NA	NA	NA
54	Apis_filamentous-like	Cluster17704	12	QANH01000406.1:10238-10544(-):Harpegnathos_saltator	Harpegnathos_saltator	QANH01000406.1_10238-10544_-__Harpegnathos_saltator	QANH01000406.1:Harpegnathos_saltator	60	NA	NA	NA	NA	NA	YP_009165839	NA	31685	QANH01000406.1:Harpegnathos_saltator	60	27	33	102	58	0	1	102	120	207	3.547e-09	57	279	1100043	unclassified_viruses	Apis_mellifera_filamentous_virus	NA	Apis_filamentous-like	Apis_filamentous-like	Viruses	NA	NA	NA	NA	NA	NA	NA	NA	NA	NA	NA	NA
54	Apis_filamentous-like	Cluster17704	12	QANH01000629.1:47274-47766(-):Harpegnathos_saltator	Harpegnathos_saltator	QANH01000629.1_47274-47766_-__Harpegnathos_saltator	QANH01000629.1:Harpegnathos_saltator	14	NA	NA	NA	NA	NA	YP_009165839	NA	33161	QANH01000629.1:Harpegnathos_saltator	14	11	37	151	92	0	1	151	120	266	7.965e-22	96	279	1100043	unclassified_viruses	Apis_mellifera_filamentous_virus	NA	Apis_filamentous-like	Apis_filamentous-like	Viruses	NA	NA	NA	NA	NA	NA	NA	NA	NA	NA	NA	NA
54	Apis_filamentous-like	Cluster17704	12	QANH01000842.1:44762-45242(-):Harpegnathos_saltator	Harpegnathos_saltator	QANH01000842.1_44762-45242_-__Harpegnathos_saltator	QANH01000842.1:Harpegnathos_saltator	8	NA	NA	NA	NA	NA	YP_009165839	NA	34976	QANH01000842.1:Harpegnathos_saltator	8	11	37.9	149	89	0	1	149	120	264	1.431e-22	98	279	1100043	unclassified_viruses	Apis_mellifera_filamentous_virus	NA	Apis_filamentous-like	Apis_filamentous-like	Viruses	NA	NA	NA	NA	NA	NA	NA	NA	NA	NA	NA	NA
54	Apis_filamentous-like	Cluster18348	2	QANH01000009.1:319477-320014(-):Harpegnathos_saltator	Harpegnathos_saltator	QANH01000009.1_319477-320014_-__Harpegnathos_saltator	QANH01000009.1:Harpegnathos_saltator	642	NA	NA	NA	NA	NA	YP_009165774	NA	24947	QANH01000009.1:Harpegnathos_saltator	642	351	32.6	180	120	0	1	179	377	556	2.541e-21	95	641	1100043	unclassified_viruses	Apis_mellifera_filamentous_virus	NA	Apis_filamentous-like	Apis_filamentous-like	Viruses	NA	NA	NA	NA	NA	NA	NA	NA	NA	NA	NA	NA
54	Apis_filamentous-like	Cluster18348	2	QANH01000058.1:50652-51671(+):Harpegnathos_saltator	Harpegnathos_saltator	QANH01000058.1_50652-51671_+__Harpegnathos_saltator	QANH01000058.1:Harpegnathos_saltator	41	NA	NA	NA	NA	NA	YP_009165774	NA	26695	QANH01000058.1:Harpegnathos_saltator	41	42	20.6	243	171	0	1	216	153	395	1.367e-07	58	641	1100043	unclassified_viruses	Apis_mellifera_filamentous_virus	NA	Apis_filamentous-like	Apis_filamentous-like	Viruses	NA	NA	NA	NA	NA	NA	NA	NA	NA	NA	NA	NA
54	Apis_filamentous-like	Cluster18348	2	QANH01000089.1:158260-158854(-):Harpegnathos_saltator	Harpegnathos_saltator	QANH01000089.1_158260-158854_-__Harpegnathos_saltator	QANH01000089.1:Harpegnathos_saltator	71	NA	NA	NA	NA	NA	YP_009165774	NA	27522	QANH01000089.1:Harpegnathos_saltator	71	47	27.7	198	132	0	1	198	426	609	3.374e-16	81	641	1100043	unclassified_viruses	Apis_mellifera_filamentous_virus	NA	Apis_filamentous-like	Apis_filamentous-like	Viruses	NA	NA	NA	NA	NA	NA	NA	NA	NA	NA	NA	NA
54	Apis_filamentous-like	Cluster18348	2	QANH01000093.1:247936-248452(+):Harpegnathos_saltator	Harpegnathos_saltator	QANH01000093.1_247936-248452_+__Harpegnathos_saltator	QANH01000093.1:Harpegnathos_saltator	433	NA	NA	NA	NA	NA	YP_009165774	NA	27648	QANH01000093.1:Harpegnathos_saltator	433	132	33.8	172	109	0	1	172	390	555	1.063e-21	96	641	1100043	unclassified_viruses	Apis_mellifera_filamentous_virus	NA	Apis_filamentous-like	Apis_filamentous-like	Viruses	NA	NA	NA	NA	NA	NA	NA	NA	NA	NA	NA	NA
54	Apis_filamentous-like	Cluster18348	2	QANH01000112.1:345317-346336(+):Harpegnathos_saltator	Harpegnathos_saltator	QANH01000112.1_345317-346336_+__Harpegnathos_saltator	QANH01000112.1:Harpegnathos_saltator	477	NA	NA	NA	NA	NA	YP_009165774	NA	27999	QANH01000112.1:Harpegnathos_saltator	477	197	20.6	243	171	0	1	216	153	395	1.367e-07	58	641	1100043	unclassified_viruses	Apis_mellifera_filamentous_virus	NA	Apis_filamentous-like	Apis_filamentous-like	Viruses	NA	NA	NA	NA	NA	NA	NA	NA	NA	NA	NA	NA
54	Apis_filamentous-like	Cluster18348	2	QANH01000200.1:31242-31851(-):Harpegnathos_saltator	Harpegnathos_saltator	QANH01000200.1_31242-31851_-__Harpegnathos_saltator	QANH01000200.1:Harpegnathos_saltator	2	NA	NA	NA	NA	NA	YP_009165774	NA	30052	QANH01000200.1:Harpegnathos_saltator	2	27	35.8	172	108	0	7	178	390	558	5.983e-24	104	641	1100043	unclassified_viruses	Apis_mellifera_filamentous_virus	NA	Apis_filamentous-like	Apis_filamentous-like	Viruses	NA	NA	NA	NA	NA	NA	NA	NA	NA	NA	NA	NA
54	Apis_filamentous-like	Cluster18348	2	QANH01000368.1:67727-68264(+):Harpegnathos_saltator	Harpegnathos_saltator	QANH01000368.1_67727-68264_+__Harpegnathos_saltator	QANH01000368.1:Harpegnathos_saltator	50	NA	NA	NA	NA	NA	YP_009165774	NA	31514	QANH01000368.1:Harpegnathos_saltator	50	41	32.4	180	120	0	1	179	377	556	6.487e-21	94	641	1100043	unclassified_viruses	Apis_mellifera_filamentous_virus	NA	Apis_filamentous-like	Apis_filamentous-like	Viruses	NA	NA	NA	NA	NA	NA	NA	NA	NA	NA	NA	NA
54	Apis_filamentous-like	Cluster19349	3	QANH01000063.1:108399-109152(-):Harpegnathos_saltator	Harpegnathos_saltator	QANH01000063.1_108399-109152_-__Harpegnathos_saltator	QANH01000063.1:Harpegnathos_saltator	27	NA	NA	NA	NA	NA	YP_009165796	NA	26698	QANH01000063.1:Harpegnathos_saltator	27	19	19.9	251	169	0	1	251	156	367	3.386e-07	55	783	1100043	unclassified_viruses	Apis_mellifera_filamentous_virus	NA	Apis_filamentous-like	Apis_filamentous-like	Viruses	NA	NA	NA	NA	NA	NA	NA	NA	NA	NA	NA	NA
54	Apis_filamentous-like	Cluster19349	3	QANH01000106.1:7725-8640(-):Harpegnathos_saltator	Harpegnathos_saltator	QANH01000106.1_7725-8640_-__Harpegnathos_saltator	QANH01000106.1:Harpegnathos_saltator	11	NA	NA	NA	NA	NA	YP_009165796	NA	27791	QANH01000106.1:Harpegnathos_saltator	11	6	19	305	207	0	1	305	156	411	1.867e-08	60	783	1100043	unclassified_viruses	Apis_mellifera_filamentous_virus	NA	Apis_filamentous-like	Apis_filamentous-like	Viruses	NA	NA	NA	NA	NA	NA	NA	NA	NA	NA	NA	NA
54	Apis_filamentous-like	Cluster19349	3	QANH01000143.1:23161-24079(-):Harpegnathos_saltator	Harpegnathos_saltator	QANH01000143.1_23161-24079_-__Harpegnathos_saltator	QANH01000143.1:Harpegnathos_saltator	15	NA	NA	NA	NA	NA	YP_009165796	NA	29024	QANH01000143.1:Harpegnathos_saltator	15	21	19.3	306	206	0	1	306	156	411	4.452e-09	62	783	1100043	unclassified_viruses	Apis_mellifera_filamentous_virus	NA	Apis_filamentous-like	Apis_filamentous-like	Viruses	NA	NA	NA	NA	NA	NA	NA	NA	NA	NA	NA	NA
54	Apis_filamentous-like	Cluster19349	3	QANH01000436.1:128515-129265(-):Harpegnathos_saltator	Harpegnathos_saltator	QANH01000436.1_128515-129265_-__Harpegnathos_saltator	QANH01000436.1:Harpegnathos_saltator	56	NA	NA	NA	NA	NA	YP_009165796	NA	31876	QANH01000436.1:Harpegnathos_saltator	56	33	20.8	254	190	0	1	241	140	393	4.035e-09	61	783	1100043	unclassified_viruses	Apis_mellifera_filamentous_virus	NA	Apis_filamentous-like	Apis_filamentous-like	Viruses	NA	NA	NA	NA	NA	NA	NA	NA	NA	NA	NA	NA
54	Apis_filamentous-like	Cluster19349	3	QANH01000523.1:185135-185915(+):Harpegnathos_saltator	Harpegnathos_saltator	QANH01000523.1_185135-185915_+__Harpegnathos_saltator	QANH01000523.1:Harpegnathos_saltator	94	NA	NA	NA	NA	NA	YP_009165796	NA	32441	QANH01000523.1:Harpegnathos_saltator	94	54	20.6	260	172	0	1	260	156	373	3.47e-09	62	783	1100043	unclassified_viruses	Apis_mellifera_filamentous_virus	NA	Apis_filamentous-like	Apis_filamentous-like	Viruses	NA	NA	NA	NA	NA	NA	NA	NA	NA	NA	NA	NA
54	Apis_filamentous-like	Cluster20217	7	QANH01000009.1:330730-331819(-):Harpegnathos_saltator	Harpegnathos_saltator	QANH01000009.1_330730-331819_-__Harpegnathos_saltator	QANH01000009.1:Harpegnathos_saltator	642	NA	NA	NA	NA	NA	YP_009165828	NA	24819	QANH01000009.1:Harpegnathos_saltator	642	351	22.1	363	280	0	1	363	39	399	6.129e-20	97	1196	1100043	unclassified_viruses	Apis_mellifera_filamentous_virus	NA	Apis_filamentous-like	Apis_filamentous-like	Viruses	NA	NA	NA	NA	NA	NA	NA	NA	NA	NA	NA	NA
54	Apis_filamentous-like	Cluster20217	7	QANH01000025.1:1572-2493(-):Harpegnathos_saltator	Harpegnathos_saltator	QANH01000025.1_1572-2493_-__Harpegnathos_saltator	QANH01000025.1:Harpegnathos_saltator	40	NA	NA	NA	NA	NA	YP_009165828	NA	25253	QANH01000025.1:Harpegnathos_saltator	40	61	21.4	315	241	0	1	307	58	372	1.173e-14	79	1196	1100043	unclassified_viruses	Apis_mellifera_filamentous_virus	NA	Apis_filamentous-like	Apis_filamentous-like	Viruses	NA	NA	NA	NA	NA	NA	NA	NA	NA	NA	NA	NA
54	Apis_filamentous-like	Cluster20217	7	QANH01000044.1:72608-73610(+):Harpegnathos_saltator	Harpegnathos_saltator	QANH01000044.1_72608-73610_+__Harpegnathos_saltator	QANH01000044.1:Harpegnathos_saltator	62	NA	NA	NA	NA	NA	YP_009165828	NA	26444	QANH01000044.1:Harpegnathos_saltator	62	42	23.9	334	247	0	1	334	11	336	1.315e-22	104	1196	1100043	unclassified_viruses	Apis_mellifera_filamentous_virus	NA	Apis_filamentous-like	Apis_filamentous-like	Viruses	NA	NA	NA	NA	NA	NA	NA	NA	NA	NA	NA	NA
54	Apis_filamentous-like	Cluster20217	7	QANH01000058.1:3780-4701(+):Harpegnathos_saltator	Harpegnathos_saltator	QANH01000058.1_3780-4701_+__Harpegnathos_saltator	QANH01000058.1:Harpegnathos_saltator	41	NA	NA	NA	NA	NA	YP_009165828	NA	26689	QANH01000058.1:Harpegnathos_saltator	41	42	21.4	315	241	0	1	307	58	372	1.173e-14	79	1196	1100043	unclassified_viruses	Apis_mellifera_filamentous_virus	NA	Apis_filamentous-like	Apis_filamentous-like	Viruses	NA	NA	NA	NA	NA	NA	NA	NA	NA	NA	NA	NA
54	Apis_filamentous-like	Cluster20217	7	QANH01000089.1:132582-133770(-):Harpegnathos_saltator	Harpegnathos_saltator	QANH01000089.1_132582-133770_-__Harpegnathos_saltator	QANH01000089.1:Harpegnathos_saltator	71	NA	NA	NA	NA	NA	YP_009165828	NA	27446	QANH01000089.1:Harpegnathos_saltator	71	47	24.8	394	292	0	3	396	11	399	1.478e-30	130	1196	1100043	unclassified_viruses	Apis_mellifera_filamentous_virus	NA	Apis_filamentous-like	Apis_filamentous-like	Viruses	NA	NA	NA	NA	NA	NA	NA	NA	NA	NA	NA	NA
54	Apis_filamentous-like	Cluster20217	7	QANH01000093.1:230576-231764(+):Harpegnathos_saltator	Harpegnathos_saltator	QANH01000093.1_230576-231764_+__Harpegnathos_saltator	QANH01000093.1:Harpegnathos_saltator	433	NA	NA	NA	NA	NA	YP_009165828	NA	27579	QANH01000093.1:Harpegnathos_saltator	433	132	24.8	394	292	0	3	396	11	399	1.478e-30	130	1196	1100043	unclassified_viruses	Apis_mellifera_filamentous_virus	NA	Apis_filamentous-like	Apis_filamentous-like	Viruses	NA	NA	NA	NA	NA	NA	NA	NA	NA	NA	NA	NA
54	Apis_filamentous-like	Cluster20217	7	QANH01000164.1:605296-606346(+):Harpegnathos_saltator	Harpegnathos_saltator	QANH01000164.1_605296-606346_+__Harpegnathos_saltator	QANH01000164.1:Harpegnathos_saltator	285	NA	NA	NA	NA	NA	YP_009165828	NA	29280	QANH01000164.1:Harpegnathos_saltator	285	146	22.9	337	258	0	1	337	3	338	3.738e-20	97	1196	1100043	unclassified_viruses	Apis_mellifera_filamentous_virus	NA	Apis_filamentous-like	Apis_filamentous-like	Viruses	NA	NA	NA	NA	NA	NA	NA	NA	NA	NA	NA	NA
54	Apis_filamentous-like	Cluster20217	7	QANH01000223.1:59547-60747(-):Harpegnathos_saltator	Harpegnathos_saltator	QANH01000223.1_59547-60747_-__Harpegnathos_saltator	QANH01000223.1:Harpegnathos_saltator	65	NA	NA	NA	NA	NA	YP_009165828	NA	30233	QANH01000223.1:Harpegnathos_saltator	65	54	24.5	393	288	0	8	400	18	399	1.302e-29	127	1196	1100043	unclassified_viruses	Apis_mellifera_filamentous_virus	NA	Apis_filamentous-like	Apis_filamentous-like	Viruses	NA	NA	NA	NA	NA	NA	NA	NA	NA	NA	NA	NA
54	Apis_filamentous-like	Cluster20217	8	QANH01000015.1:1089330-1090503(-):Harpegnathos_saltator	Harpegnathos_saltator	QANH01000015.1_1089330-1090503_-__Harpegnathos_saltator	QANH01000015.1:Harpegnathos_saltator	488	NA	NA	NA	NA	NA	YP_009165828	NA	24976	QANH01000015.1:Harpegnathos_saltator	488	229	21.2	373	292	0	19	391	39	409	2.96e-18	92	1196	1100043	unclassified_viruses	Apis_mellifera_filamentous_virus	NA	Apis_filamentous-like	Apis_filamentous-like	Viruses	NA	NA	NA	NA	NA	NA	NA	NA	NA	NA	NA	NA
54	Apis_filamentous-like	Cluster20217	8	QANH01000114.1_1:303098-304028(+):Harpegnathos_saltator	Harpegnathos_saltator	QANH01000114.1_1_303098-304028_+__Harpegnathos_saltator	QANH01000114.1_1:Harpegnathos_saltator	67	NA	NA	NA	NA	NA	YP_009165828	NA	28000	QANH01000114.1_1:Harpegnathos_saltator	67	50	19.8	310	243	0	1	310	31	334	1.919e-10	66	1196	1100043	unclassified_viruses	Apis_mellifera_filamentous_virus	NA	Apis_filamentous-like	Apis_filamentous-like	Viruses	NA	NA	NA	NA	NA	NA	NA	NA	NA	NA	NA	NA
54	Apis_filamentous-like	Cluster20217	8	QANH01000269.1:26783-27746(+):Harpegnathos_saltator	Harpegnathos_saltator	QANH01000269.1_26783-27746_+__Harpegnathos_saltator	QANH01000269.1:Harpegnathos_saltator	2	NA	NA	NA	NA	NA	YP_009165828	NA	30553	QANH01000269.1:Harpegnathos_saltator	2	7	20	321	253	0	1	321	83	399	1.186e-11	70	1196	1100043	unclassified_viruses	Apis_mellifera_filamentous_virus	NA	Apis_filamentous-like	Apis_filamentous-like	Viruses	NA	NA	NA	NA	NA	NA	NA	NA	NA	NA	NA	NA
54	Apis_filamentous-like	Cluster20217	8	QANH01000273.1:40843-41986(+):Harpegnathos_saltator	Harpegnathos_saltator	QANH01000273.1_40843-41986_+__Harpegnathos_saltator	QANH01000273.1:Harpegnathos_saltator	12	NA	NA	NA	NA	NA	YP_009165828	NA	30595	QANH01000273.1:Harpegnathos_saltator	12	16	20.7	376	293	0	6	381	9	378	6.469e-17	88	1196	1100043	unclassified_viruses	Apis_mellifera_filamentous_virus	NA	Apis_filamentous-like	Apis_filamentous-like	Viruses	NA	NA	NA	NA	NA	NA	NA	NA	NA	NA	NA	NA
54	Apis_filamentous-like	Cluster20217	8	QANH01000406.1:43837-45019(+):Harpegnathos_saltator	Harpegnathos_saltator	QANH01000406.1_43837-45019_+__Harpegnathos_saltator	QANH01000406.1:Harpegnathos_saltator	60	NA	NA	NA	NA	NA	YP_009165828	NA	31686	QANH01000406.1:Harpegnathos_saltator	60	27	21.4	383	294	0	11	393	9	383	1.666e-19	96	1196	1100043	unclassified_viruses	Apis_mellifera_filamentous_virus	NA	Apis_filamentous-like	Apis_filamentous-like	Viruses	NA	NA	NA	NA	NA	NA	NA	NA	NA	NA	NA	NA
54	Apis_filamentous-like	Cluster20941	1	QANH01000065.1:240855-241494(+):Harpegnathos_saltator	Harpegnathos_saltator	QANH01000065.1_240855-241494_+__Harpegnathos_saltator	QANH01000065.1:Harpegnathos_saltator	47	NA	NA	NA	NA	NA	YP_009165902	NA	26707	QANH01000065.1:Harpegnathos_saltator	47	61	21.9	195	149	0	1	192	94	288	8.545e-07	53	395	1100043	unclassified_viruses	Apis_mellifera_filamentous_virus	NA	Apis_filamentous-like	Apis_filamentous-like	Viruses	NA	NA	NA	NA	NA	NA	NA	NA	NA	NA	NA	NA
54	Apis_filamentous-like	Cluster20941	1	QANH01000075.1:23320-24070(+):Harpegnathos_saltator	Harpegnathos_saltator	QANH01000075.1_23320-24070_+__Harpegnathos_saltator	QANH01000075.1:Harpegnathos_saltator	766	NA	NA	NA	NA	NA	YP_009165902	NA	27329	QANH01000075.1:Harpegnathos_saltator	766	221	20.5	254	198	0	1	250	94	347	1.767e-08	59	395	1100043	unclassified_viruses	Apis_mellifera_filamentous_virus	NA	Apis_filamentous-like	Apis_filamentous-like	Viruses	NA	NA	NA	NA	NA	NA	NA	NA	NA	NA	NA	NA
54	Apis_filamentous-like	Cluster20941	1	QANH01000114.1_1:199590-200337(-):Harpegnathos_saltator	Harpegnathos_saltator	QANH01000114.1_1_199590-200337_-__Harpegnathos_saltator	QANH01000114.1_1:Harpegnathos_saltator	67	NA	NA	NA	NA	NA	YP_009165902	NA	28007	QANH01000114.1_1:Harpegnathos_saltator	67	50	21	254	196	0	1	249	94	347	1.634e-09	63	395	1100043	unclassified_viruses	Apis_mellifera_filamentous_virus	NA	Apis_filamentous-like	Apis_filamentous-like	Viruses	NA	NA	NA	NA	NA	NA	NA	NA	NA	NA	NA	NA
54	Apis_filamentous-like	Cluster20941	1	QANH01000138.1:129435-130011(+):Harpegnathos_saltator	Harpegnathos_saltator	QANH01000138.1_129435-130011_+__Harpegnathos_saltator	QANH01000138.1:Harpegnathos_saltator	81	NA	NA	NA	NA	NA	YP_009165902	NA	28877	QANH01000138.1:Harpegnathos_saltator	81	54	22.2	195	149	0	1	192	94	288	2.358e-07	55	395	1100043	unclassified_viruses	Apis_mellifera_filamentous_virus	NA	Apis_filamentous-like	Apis_filamentous-like	Viruses	NA	NA	NA	NA	NA	NA	NA	NA	NA	NA	NA	NA
54	Apis_filamentous-like	Cluster20941	1	QANH01000143.1:68687-69263(-):Harpegnathos_saltator	Harpegnathos_saltator	QANH01000143.1_68687-69263_-__Harpegnathos_saltator	QANH01000143.1:Harpegnathos_saltator	15	NA	NA	NA	NA	NA	YP_009165902	NA	29023	QANH01000143.1:Harpegnathos_saltator	15	21	21.9	195	149	0	1	192	94	288	5.835e-07	53	395	1100043	unclassified_viruses	Apis_mellifera_filamentous_virus	NA	Apis_filamentous-like	Apis_filamentous-like	Viruses	NA	NA	NA	NA	NA	NA	NA	NA	NA	NA	NA	NA
54	Apis_filamentous-like	Cluster20941	1	QANH01000223.1:200371-200674(+):Harpegnathos_saltator	Harpegnathos_saltator	QANH01000223.1_200371-200674_+__Harpegnathos_saltator	QANH01000223.1:Harpegnathos_saltator	65	NA	NA	NA	NA	NA	YP_009165902	NA	30253	QANH01000223.1:Harpegnathos_saltator	65	54	32.3	103	68	0	1	101	94	196	8.806e-09	55	395	1100043	unclassified_viruses	Apis_mellifera_filamentous_virus	NA	Apis_filamentous-like	Apis_filamentous-like	Viruses	NA	NA	NA	NA	NA	NA	NA	NA	NA	NA	NA	NA
54	Apis_filamentous-like	Cluster20941	1	QANH01000524.1:50900-51647(-):Harpegnathos_saltator	Harpegnathos_saltator	QANH01000524.1_50900-51647_-__Harpegnathos_saltator	QANH01000524.1:Harpegnathos_saltator	33	NA	NA	NA	NA	NA	YP_009165902	NA	32443	QANH01000524.1:Harpegnathos_saltator	33	20	20.2	254	198	0	1	249	94	347	5.662e-08	58	395	1100043	unclassified_viruses	Apis_mellifera_filamentous_virus	NA	Apis_filamentous-like	Apis_filamentous-like	Viruses	NA	NA	NA	NA	NA	NA	NA	NA	NA	NA	NA	NA
54	Apis_filamentous-like	Cluster21733	6	QANH01000015.1_2-HSPs_+__Harpegnathos_saltator	Harpegnathos_saltator	QANH01000015.1_2-HSPs_+__Harpegnathos_saltator	QANH01000015.1:Harpegnathos_saltator	488	NA	NA	NA	NA	NA	YP_009165851	NA	24993	QANH01000015.1:Harpegnathos_saltator	488	229	28.5	141	99	0	2	142	226	364	2.918e-10	62	401	1100043	unclassified_viruses	Apis_mellifera_filamentous_virus	NA	Apis_filamentous-like	Apis_filamentous-like	Viruses	NA	NA	NA	NA	NA	NA	NA	NA	NA	NA	NA	NA
54	Apis_filamentous-like	Cluster21733	8	KQ466978.1_2-HSPs_+__Dinoponera_quadriceps	KQ466978.1_2-HSPs_+__Dinoponera_quadriceps	KQ466978.1_2-HSPs_+__Dinoponera_quadriceps	KQ466978.1:Dinoponera_quadriceps	NA	NA	NA	NA	NA	NA	NP_818742	NA	10102	KQ466978.1:Dinoponera_quadriceps	37	13	34.1	118	74	0	13	126	215	332	3.835e-12	68	384	224399	NA	Adoxophyes_honmai_nucleopolyhedrovirus	Alphabaculovirus	Baculoviridae	Apis_filamentous-like	Viruses	NA	NA	NA	NA	NA	NA	NA	NA	NA	NA	NA	NA
54	Apis_filamentous-like	Cluster21733	8	KQ467049.1:58644-59470(-):Dinoponera_quadriceps	Dinoponera_quadriceps	KQ467049.1_58644-59470_-__Dinoponera_quadriceps	KQ467049.1:Dinoponera_quadriceps	58	NA	NA	NA	NA	NA	YP_009165851	NA	10153	KQ467049.1:Dinoponera_quadriceps	58	12	35	146	89	0	59	196	72	217	4.171e-17	86	401	1100043	unclassified_viruses	Apis_mellifera_filamentous_virus	NA	Apis_filamentous-like	Apis_filamentous-like	Viruses	NA	NA	NA	NA	NA	NA	NA	NA	NA	NA	NA	NA
54	Apis_filamentous-like	Cluster21733	8	KQ468257.1:12848-13502(+):Dinoponera_quadriceps	Dinoponera_quadriceps	KQ468257.1_12848-13502_+__Dinoponera_quadriceps	KQ468257.1:Dinoponera_quadriceps	NA	NA	NA	NA	NA	NA	YP_009165851	NA	10332	KQ468257.1:Dinoponera_quadriceps	2	3	39	148	83	0	75	211	72	219	8.519e-23	101	401	1100043	unclassified_viruses	Apis_mellifera_filamentous_virus	NA	Apis_filamentous-like	Apis_filamentous-like	Viruses	NA	NA	NA	NA	NA	NA	NA	NA	NA	NA	NA	NA
54	Apis_filamentous-like	Cluster21733	8	QANH01000015.1:640407-640848(+):Harpegnathos_saltator	Harpegnathos_saltator	QANH01000015.1_640407-640848_+__Harpegnathos_saltator	QANH01000015.1:Harpegnathos_saltator	NA	NA	NA	NA	NA	NA	YP_009165851	NA	24993	QANH01000015.1:Harpegnathos_saltator	378	229	28.5	141	99	0	2	142	226	364	2.918e-10	62	401	1100043	unclassified_viruses	Apis_mellifera_filamentous_virus	NA	Apis_filamentous-like	Apis_filamentous-like	Viruses	NA	NA	NA	NA	NA	NA	NA	NA	NA	NA	NA	NA
54	Apis_filamentous-like	Cluster21733	8	QANH01000015.1:788477-788903(-):Harpegnathos_saltator	Harpegnathos_saltator	QANH01000015.1_788477-788903_-__Harpegnathos_saltator	QANH01000015.1:Harpegnathos_saltator	488	NA	NA	NA	NA	NA	YP_009165851	NA	25099	QANH01000015.1:Harpegnathos_saltator	488	229	40.7	120	70	0	7	125	143	262	2.555e-19	88	401	1100043	unclassified_viruses	Apis_mellifera_filamentous_virus	NA	Apis_filamentous-like	Apis_filamentous-like	Viruses	NA	NA	NA	NA	NA	NA	NA	NA	NA	NA	NA	NA
54	Apis_filamentous-like	Cluster21733	8	QANH01000015.1:851264-852230(-):Harpegnathos_saltator	Harpegnathos_saltator	QANH01000015.1_851264-852230_-__Harpegnathos_saltator	QANH01000015.1:Harpegnathos_saltator	488	NA	NA	NA	NA	NA	YP_009165851	NA	25115	QANH01000015.1:Harpegnathos_saltator	488	229	34.2	258	168	0	66	322	103	360	4.381e-36	144	401	1100043	unclassified_viruses	Apis_mellifera_filamentous_virus	NA	Apis_filamentous-like	Apis_filamentous-like	Viruses	NA	NA	NA	NA	NA	NA	NA	NA	NA	NA	NA	NA
54	Apis_filamentous-like	Cluster21733	8	QANH01000015.1:952374-953538(-):Harpegnathos_saltator	Harpegnathos_saltator	QANH01000015.1_952374-953538_-__Harpegnathos_saltator	QANH01000015.1:Harpegnathos_saltator	488	NA	NA	NA	NA	NA	YP_009165851	NA	25075	QANH01000015.1:Harpegnathos_saltator	488	229	30.4	327	226	0	62	388	72	397	4.01e-38	153	401	1100043	unclassified_viruses	Apis_mellifera_filamentous_virus	NA	Apis_filamentous-like	Apis_filamentous-like	Viruses	NA	NA	NA	NA	NA	NA	NA	NA	NA	NA	NA	NA
54	Apis_filamentous-like	Cluster21733	8	QANH01000028.1:8818-9547(+):Harpegnathos_saltator	Harpegnathos_saltator	QANH01000028.1_8818-9547_+__Harpegnathos_saltator	QANH01000028.1:Harpegnathos_saltator	NA	NA	NA	NA	NA	NA	YP_009165851	NA	25397	QANH01000028.1:Harpegnathos_saltator	294	129	39.3	201	118	0	2	197	127	327	5.309e-35	138	401	1100043	unclassified_viruses	Apis_mellifera_filamentous_virus	NA	Apis_filamentous-like	Apis_filamentous-like	Viruses	NA	NA	NA	NA	NA	NA	NA	NA	NA	NA	NA	NA
54	Apis_filamentous-like	Cluster21733	8	QANH01000035.1:147975-148501(-):Harpegnathos_saltator	Harpegnathos_saltator	QANH01000035.1_147975-148501_-__Harpegnathos_saltator	QANH01000035.1:Harpegnathos_saltator	9	NA	NA	NA	NA	NA	YP_009165851	NA	25991	QANH01000035.1:Harpegnathos_saltator	9	30	36.7	101	63	0	1	101	172	272	5.559e-11	65	401	1100043	unclassified_viruses	Apis_mellifera_filamentous_virus	NA	Apis_filamentous-like	Apis_filamentous-like	Viruses	NA	NA	NA	NA	NA	NA	NA	NA	NA	NA	NA	NA
54	Apis_filamentous-like	Cluster21733	8	QANH01000041.1:56712-57912(+):Harpegnathos_saltator	Harpegnathos_saltator	QANH01000041.1_56712-57912_+__Harpegnathos_saltator	QANH01000041.1:Harpegnathos_saltator	NA	NA	NA	NA	NA	NA	YP_009165851	NA	26279	QANH01000041.1:Harpegnathos_saltator	48	22	30.6	333	224	0	68	400	69	392	1.885e-39	157	401	1100043	unclassified_viruses	Apis_mellifera_filamentous_virus	NA	Apis_filamentous-like	Apis_filamentous-like	Viruses	NA	NA	NA	NA	NA	NA	NA	NA	NA	NA	NA	NA
54	Apis_filamentous-like	Cluster21733	8	QANH01000041.1:6666-7645(+):Harpegnathos_saltator	Harpegnathos_saltator	QANH01000041.1_6666-7645_+__Harpegnathos_saltator	QANH01000041.1:Harpegnathos_saltator	NA	NA	NA	NA	NA	NA	YP_009165851	NA	26413	QANH01000041.1:Harpegnathos_saltator	48	22	38.4	166	100	0	61	224	69	234	9.026e-25	111	401	1100043	unclassified_viruses	Apis_mellifera_filamentous_virus	NA	Apis_filamentous-like	Apis_filamentous-like	Viruses	NA	NA	NA	NA	NA	NA	NA	NA	NA	NA	NA	NA
54	Apis_filamentous-like	Cluster21733	8	QANH01000046.1_2-HSPs_-__Harpegnathos_saltator	Harpegnathos_saltator	QANH01000046.1_2-HSPs_-__Harpegnathos_saltator	QANH01000046.1:Harpegnathos_saltator	364	NA	NA	NA	NA	NA	YP_009165851	NA	26567	QANH01000046.1:Harpegnathos_saltator	364	211	36.2	129	78	0	61	183	69	197	4.137e-16	80	401	1100043	unclassified_viruses	Apis_mellifera_filamentous_virus	NA	Apis_filamentous-like	Apis_filamentous-like	Viruses	NA	NA	NA	NA	NA	NA	NA	NA	NA	NA	NA	NA
54	Apis_filamentous-like	Cluster21733	8	QANH01000065.1_2-HSPs_-__Harpegnathos_saltator	Harpegnathos_saltator	QANH01000065.1_2-HSPs_-__Harpegnathos_saltator	QANH01000065.1:Harpegnathos_saltator	47	NA	NA	NA	NA	NA	YP_009165851	NA	26800	QANH01000065.1:Harpegnathos_saltator	47	61	46.2	107	55	0	18	121	111	217	2.835e-21	93	401	1100043	unclassified_viruses	Apis_mellifera_filamentous_virus	NA	Apis_filamentous-like	Apis_filamentous-like	Viruses	NA	NA	NA	NA	NA	NA	NA	NA	NA	NA	NA	NA
54	Apis_filamentous-like	Cluster21733	8	QANH01000070.1:102854-103244(+):Harpegnathos_saltator	Harpegnathos_saltator	QANH01000070.1_102854-103244_+__Harpegnathos_saltator	QANH01000070.1:Harpegnathos_saltator	NA	NA	NA	NA	NA	NA	YP_009165851	NA	26851	QANH01000070.1:Harpegnathos_saltator	28	27	47.2	111	58	0	1	111	188	298	3.198e-23	98	401	1100043	unclassified_viruses	Apis_mellifera_filamentous_virus	NA	Apis_filamentous-like	Apis_filamentous-like	Viruses	NA	NA	NA	NA	NA	NA	NA	NA	NA	NA	NA	NA
54	Apis_filamentous-like	Cluster21733	8	QANH01000074.1:66842-67850(+):Harpegnathos_saltator	Harpegnathos_saltator	QANH01000074.1_66842-67850_+__Harpegnathos_saltator	QANH01000074.1:Harpegnathos_saltator	NA	NA	NA	NA	NA	NA	YP_009165851	NA	27241	QANH01000074.1:Harpegnathos_saltator	25	17	34.8	262	170	0	76	336	103	364	4.734e-38	151	401	1100043	unclassified_viruses	Apis_mellifera_filamentous_virus	NA	Apis_filamentous-like	Apis_filamentous-like	Viruses	NA	NA	NA	NA	NA	NA	NA	NA	NA	NA	NA	NA
54	Apis_filamentous-like	Cluster21733	8	QANH01000100.1:70885-71404(+):Harpegnathos_saltator	Harpegnathos_saltator	QANH01000100.1_70885-71404_+__Harpegnathos_saltator	QANH01000100.1:Harpegnathos_saltator	NA	NA	NA	NA	NA	NA	YP_009165851	NA	27712	QANH01000100.1:Harpegnathos_saltator	30	54	24.9	173	128	0	1	173	226	397	2.122e-09	60	401	1100043	unclassified_viruses	Apis_mellifera_filamentous_virus	NA	Apis_filamentous-like	Apis_filamentous-like	Viruses	NA	NA	NA	NA	NA	NA	NA	NA	NA	NA	NA	NA
54	Apis_filamentous-like	Cluster21733	8	QANH01000110.1:565567-566500(-):Harpegnathos_saltator	Harpegnathos_saltator	QANH01000110.1_565567-566500_-__Harpegnathos_saltator	QANH01000110.1:Harpegnathos_saltator	423	NA	NA	NA	NA	NA	YP_009165851	NA	27799	QANH01000110.1:Harpegnathos_saltator	423	191	30.5	311	211	0	1	311	93	397	9.3e-37	146	401	1100043	unclassified_viruses	Apis_mellifera_filamentous_virus	NA	Apis_filamentous-like	Apis_filamentous-like	Viruses	NA	NA	NA	NA	NA	NA	NA	NA	NA	NA	NA	NA
54	Apis_filamentous-like	Cluster21733	8	QANH01000112.1:159952-160840(-):Harpegnathos_saltator	Harpegnathos_saltator	QANH01000112.1_159952-160840_-__Harpegnathos_saltator	QANH01000112.1:Harpegnathos_saltator	477	NA	NA	NA	NA	NA	YP_009165851	NA	27889	QANH01000112.1:Harpegnathos_saltator	477	197	34.8	238	148	0	6	243	71	298	5.313e-34	137	401	1100043	unclassified_viruses	Apis_mellifera_filamentous_virus	NA	Apis_filamentous-like	Apis_filamentous-like	Viruses	NA	NA	NA	NA	NA	NA	NA	NA	NA	NA	NA	NA
54	Apis_filamentous-like	Cluster21733	8	QANH01000117.1:212374-213154(+):Harpegnathos_saltator	Harpegnathos_saltator	QANH01000117.1_212374-213154_+__Harpegnathos_saltator	QANH01000117.1:Harpegnathos_saltator	NA	NA	NA	NA	NA	NA	YP_009165851	NA	28015	QANH01000117.1:Harpegnathos_saltator	43	50	38.5	237	142	0	3	239	103	334	2.213e-41	157	401	1100043	unclassified_viruses	Apis_mellifera_filamentous_virus	NA	Apis_filamentous-like	Apis_filamentous-like	Viruses	NA	NA	NA	NA	NA	NA	NA	NA	NA	NA	NA	NA
54	Apis_filamentous-like	Cluster21733	8	QANH01000130.1:44017-44644(+):Harpegnathos_saltator	Harpegnathos_saltator	QANH01000130.1_44017-44644_+__Harpegnathos_saltator	QANH01000130.1:Harpegnathos_saltator	NA	NA	NA	NA	NA	NA	YP_009165851	NA	28654	QANH01000130.1:Harpegnathos_saltator	22	15	42.6	104	59	0	1	103	195	298	4.592e-16	81	401	1100043	unclassified_viruses	Apis_mellifera_filamentous_virus	NA	Apis_filamentous-like	Apis_filamentous-like	Viruses	NA	NA	NA	NA	NA	NA	NA	NA	NA	NA	NA	NA
54	Apis_filamentous-like	Cluster21733	8	QANH01000130.1:46161-46608(-):Harpegnathos_saltator	Harpegnathos_saltator	QANH01000130.1_46161-46608_-__Harpegnathos_saltator	QANH01000130.1:Harpegnathos_saltator	12	NA	NA	NA	NA	NA	YP_009165851	NA	28525	QANH01000130.1:Harpegnathos_saltator	12	15	43.5	136	76	0	2	136	175	310	3.6e-26	108	401	1100043	unclassified_viruses	Apis_mellifera_filamentous_virus	NA	Apis_filamentous-like	Apis_filamentous-like	Viruses	NA	NA	NA	NA	NA	NA	NA	NA	NA	NA	NA	NA
54	Apis_filamentous-like	Cluster21733	8	QANH01000132.1:83761-84385(+):Harpegnathos_saltator	Harpegnathos_saltator	QANH01000132.1_83761-84385_+__Harpegnathos_saltator	QANH01000132.1:Harpegnathos_saltator	NA	NA	NA	NA	NA	NA	YP_009165851	NA	28801	QANH01000132.1:Harpegnathos_saltator	7	21	28.1	208	148	0	1	208	191	397	4.37e-18	87	401	1100043	unclassified_viruses	Apis_mellifera_filamentous_virus	NA	Apis_filamentous-like	Apis_filamentous-like	Viruses	NA	NA	NA	NA	NA	NA	NA	NA	NA	NA	NA	NA
54	Apis_filamentous-like	Cluster21733	8	QANH01000164.1:20099-20834(-):Harpegnathos_saltator	Harpegnathos_saltator	QANH01000164.1_20099-20834_-__Harpegnathos_saltator	QANH01000164.1:Harpegnathos_saltator	285	NA	NA	NA	NA	NA	YP_009165851	NA	29424	QANH01000164.1:Harpegnathos_saltator	285	146	36.7	206	129	0	1	206	94	298	9.966e-32	128	401	1100043	unclassified_viruses	Apis_mellifera_filamentous_virus	NA	Apis_filamentous-like	Apis_filamentous-like	Viruses	NA	NA	NA	NA	NA	NA	NA	NA	NA	NA	NA	NA
54	Apis_filamentous-like	Cluster21733	8	QANH01000164.1:516281-516947(+):Harpegnathos_saltator	Harpegnathos_saltator	QANH01000164.1_516281-516947_+__Harpegnathos_saltator	QANH01000164.1:Harpegnathos_saltator	NA	NA	NA	NA	NA	NA	YP_009165851	NA	29354	QANH01000164.1:Harpegnathos_saltator	208	146	43.2	174	97	0	21	194	129	299	1.212e-34	136	401	1100043	unclassified_viruses	Apis_mellifera_filamentous_virus	NA	Apis_filamentous-like	Apis_filamentous-like	Viruses	NA	NA	NA	NA	NA	NA	NA	NA	NA	NA	NA	NA
54	Apis_filamentous-like	Cluster21733	8	QANH01000169.1:708532-709384(+):Harpegnathos_saltator	Harpegnathos_saltator	QANH01000169.1_708532-709384_+__Harpegnathos_saltator	QANH01000169.1:Harpegnathos_saltator	NA	NA	NA	NA	NA	NA	YP_009165851	NA	29453	QANH01000169.1:Harpegnathos_saltator	81	65	39.4	237	140	0	39	275	103	334	1.2e-42	162	401	1100043	unclassified_viruses	Apis_mellifera_filamentous_virus	NA	Apis_filamentous-like	Apis_filamentous-like	Viruses	NA	NA	NA	NA	NA	NA	NA	NA	NA	NA	NA	NA
54	Apis_filamentous-like	Cluster21733	8	QANH01000178.1_2-HSPs_+__Harpegnathos_saltator	QANH01000178.1_2-HSPs_+__Harpegnathos_saltator	QANH01000178.1_2-HSPs_+__Harpegnathos_saltator	QANH01000178.1:Harpegnathos_saltator	NA	NA	NA	NA	NA	NA	YP_009165851	NA	29764	QANH01000178.1:Harpegnathos_saltator	87	53	35.4	149	94	0	6	154	71	217	1.321e-19	89	401	1100043	unclassified_viruses	Apis_mellifera_filamentous_virus	NA	Apis_filamentous-like	Apis_filamentous-like	Viruses	NA	NA	NA	NA	NA	NA	NA	NA	NA	NA	NA	NA
54	Apis_filamentous-like	Cluster21733	8	QANH01000187.1:51745-52283(-):Harpegnathos_saltator	Harpegnathos_saltator	QANH01000187.1_51745-52283_-__Harpegnathos_saltator	QANH01000187.1:Harpegnathos_saltator	19	NA	NA	NA	NA	NA	YP_009165851	NA	29969	QANH01000187.1:Harpegnathos_saltator	19	29	47.4	115	59	0	10	123	163	277	9.125e-24	102	401	1100043	unclassified_viruses	Apis_mellifera_filamentous_virus	NA	Apis_filamentous-like	Apis_filamentous-like	Viruses	NA	NA	NA	NA	NA	NA	NA	NA	NA	NA	NA	NA
54	Apis_filamentous-like	Cluster21733	8	QANH01000219.1:43616-44831(+):Harpegnathos_saltator	Harpegnathos_saltator	QANH01000219.1_43616-44831_+__Harpegnathos_saltator	QANH01000219.1:Harpegnathos_saltator	NA	NA	NA	NA	NA	NA	YP_009165851	NA	30133	QANH01000219.1:Harpegnathos_saltator	31	56	41.8	196	111	0	142	332	103	298	7.66e-36	146	401	1100043	unclassified_viruses	Apis_mellifera_filamentous_virus	NA	Apis_filamentous-like	Apis_filamentous-like	Viruses	NA	NA	NA	NA	NA	NA	NA	NA	NA	NA	NA	NA
54	Apis_filamentous-like	Cluster21733	8	QANH01000254.1:44096-44768(-):Harpegnathos_saltator	Harpegnathos_saltator	QANH01000254.1_44096-44768_-__Harpegnathos_saltator	QANH01000254.1:Harpegnathos_saltator	13	NA	NA	NA	NA	NA	YP_009165851	NA	30275	QANH01000254.1:Harpegnathos_saltator	13	14	48.5	141	69	0	16	156	164	298	4.912e-32	128	401	1100043	unclassified_viruses	Apis_mellifera_filamentous_virus	NA	Apis_filamentous-like	Apis_filamentous-like	Viruses	NA	NA	NA	NA	NA	NA	NA	NA	NA	NA	NA	NA
54	Apis_filamentous-like	Cluster21733	8	QANH01000280.1:109254-109881(+):Harpegnathos_saltator	Harpegnathos_saltator	QANH01000280.1_109254-109881_+__Harpegnathos_saltator	QANH01000280.1:Harpegnathos_saltator	NA	NA	NA	NA	NA	NA	YP_009165851	NA	30657	QANH01000280.1:Harpegnathos_saltator	63	42	42.6	104	59	0	1	103	195	298	4.592e-16	81	401	1100043	unclassified_viruses	Apis_mellifera_filamentous_virus	NA	Apis_filamentous-like	Apis_filamentous-like	Viruses	NA	NA	NA	NA	NA	NA	NA	NA	NA	NA	NA	NA
54	Apis_filamentous-like	Cluster21733	8	QANH01000283.1:38053-38425(-):Harpegnathos_saltator	Harpegnathos_saltator	QANH01000283.1_38053-38425_-__Harpegnathos_saltator	QANH01000283.1:Harpegnathos_saltator	8	NA	NA	NA	NA	NA	YP_009165851	NA	30891	QANH01000283.1:Harpegnathos_saltator	8	21	43.7	124	68	0	1	121	94	217	1.323e-23	99	401	1100043	unclassified_viruses	Apis_mellifera_filamentous_virus	NA	Apis_filamentous-like	Apis_filamentous-like	Viruses	NA	NA	NA	NA	NA	NA	NA	NA	NA	NA	NA	NA
54	Apis_filamentous-like	Cluster21733	8	QANH01000367.1:6244-7229(+):Harpegnathos_saltator	Harpegnathos_saltator	QANH01000367.1_6244-7229_+__Harpegnathos_saltator	QANH01000367.1:Harpegnathos_saltator	NA	NA	NA	NA	NA	NA	YP_009165851	NA	31273	QANH01000367.1:Harpegnathos_saltator	9	4	34.3	165	104	0	1	160	69	233	2.802e-19	94	401	1100043	unclassified_viruses	Apis_mellifera_filamentous_virus	NA	Apis_filamentous-like	Apis_filamentous-like	Viruses	NA	NA	NA	NA	NA	NA	NA	NA	NA	NA	NA	NA
54	Apis_filamentous-like	Cluster21733	8	QANH01000368.1:208792-209941(-):Harpegnathos_saltator	Harpegnathos_saltator	QANH01000368.1_208792-209941_-__Harpegnathos_saltator	QANH01000368.1:Harpegnathos_saltator	50	NA	NA	NA	NA	NA	YP_009165851	NA	31379	QANH01000368.1:Harpegnathos_saltator	50	41	36	259	164	0	65	321	69	327	2.276e-39	156	401	1100043	unclassified_viruses	Apis_mellifera_filamentous_virus	NA	Apis_filamentous-like	Apis_filamentous-like	Viruses	NA	NA	NA	NA	NA	NA	NA	NA	NA	NA	NA	NA
54	Apis_filamentous-like	Cluster21733	8	QANH01000521.1:29789-30809(-):Harpegnathos_saltator	Harpegnathos_saltator	QANH01000521.1_29789-30809_-__Harpegnathos_saltator	QANH01000521.1:Harpegnathos_saltator	3	NA	NA	NA	NA	NA	YP_009165851	NA	32309	QANH01000521.1:Harpegnathos_saltator	3	6	30.2	332	225	0	9	340	69	392	6.152e-39	153	401	1100043	unclassified_viruses	Apis_mellifera_filamentous_virus	NA	Apis_filamentous-like	Apis_filamentous-like	Viruses	NA	NA	NA	NA	NA	NA	NA	NA	NA	NA	NA	NA
54	Apis_filamentous-like	Cluster21733	8	QANH01000535.1:77399-78593(+):Harpegnathos_saltator	Harpegnathos_saltator	QANH01000535.1_77399-78593_+__Harpegnathos_saltator	QANH01000535.1:Harpegnathos_saltator	NA	NA	NA	NA	NA	NA	YP_009165851	NA	32660	QANH01000535.1:Harpegnathos_saltator	29	22	29.2	331	229	0	68	398	69	392	2.2e-35	145	401	1100043	unclassified_viruses	Apis_mellifera_filamentous_virus	NA	Apis_filamentous-like	Apis_filamentous-like	Viruses	NA	NA	NA	NA	NA	NA	NA	NA	NA	NA	NA	NA
54	Apis_filamentous-like	Cluster21733	8	QANH01000580.1:25134-25872(-):Harpegnathos_saltator	Harpegnathos_saltator	QANH01000580.1_25134-25872_-__Harpegnathos_saltator	QANH01000580.1:Harpegnathos_saltator	606	NA	NA	NA	NA	NA	YP_009165851	NA	32806	QANH01000580.1:Harpegnathos_saltator	606	199	42.6	191	107	0	2	192	111	298	1.152e-37	146	401	1100043	unclassified_viruses	Apis_mellifera_filamentous_virus	NA	Apis_filamentous-like	Apis_filamentous-like	Viruses	NA	NA	NA	NA	NA	NA	NA	NA	NA	NA	NA	NA
54	Apis_filamentous-like	Cluster21733	8	QANH01000621.1:40758-41775(+):Harpegnathos_saltator	Harpegnathos_saltator	QANH01000621.1_40758-41775_+__Harpegnathos_saltator	QANH01000621.1:Harpegnathos_saltator	NA	NA	NA	NA	NA	NA	YP_009165851	NA	33040	QANH01000621.1:Harpegnathos_saltator	25	12	31.5	334	221	0	6	339	71	394	1.455e-42	164	401	1100043	unclassified_viruses	Apis_mellifera_filamentous_virus	NA	Apis_filamentous-like	Apis_filamentous-like	Viruses	NA	NA	NA	NA	NA	NA	NA	NA	NA	NA	NA	NA
54	Apis_filamentous-like	Cluster21733	8	QANH01000621.1:9357-10257(-):Harpegnathos_saltator	Harpegnathos_saltator	QANH01000621.1_9357-10257_-__Harpegnathos_saltator	QANH01000621.1:Harpegnathos_saltator	30	NA	NA	NA	NA	NA	YP_009165851	NA	32941	QANH01000621.1:Harpegnathos_saltator	30	12	35.6	236	146	0	6	241	71	298	5.06e-35	140	401	1100043	unclassified_viruses	Apis_mellifera_filamentous_virus	NA	Apis_filamentous-like	Apis_filamentous-like	Viruses	NA	NA	NA	NA	NA	NA	NA	NA	NA	NA	NA	NA
54	Apis_filamentous-like	Cluster21733	8	QANH01000667.1:1682-2564(+):Harpegnathos_saltator	Harpegnathos_saltator	QANH01000667.1_1682-2564_+__Harpegnathos_saltator	QANH01000667.1:Harpegnathos_saltator	NA	NA	NA	NA	NA	NA	YP_009165851	NA	33278	QANH01000667.1:Harpegnathos_saltator	38	38	32.7	294	189	0	1	294	111	392	1.135e-39	154	401	1100043	unclassified_viruses	Apis_mellifera_filamentous_virus	NA	Apis_filamentous-like	Apis_filamentous-like	Viruses	NA	NA	NA	NA	NA	NA	NA	NA	NA	NA	NA	NA
54	Apis_filamentous-like	Cluster21733	8	QANH01000728.1:61671-62457(+):Harpegnathos_saltator	Harpegnathos_saltator	QANH01000728.1_61671-62457_+__Harpegnathos_saltator	QANH01000728.1:Harpegnathos_saltator	NA	NA	NA	NA	NA	NA	YP_009165851	NA	33786	QANH01000728.1:Harpegnathos_saltator	44	49	31.8	237	160	0	26	262	161	396	2.111e-28	119	401	1100043	unclassified_viruses	Apis_mellifera_filamentous_virus	NA	Apis_filamentous-like	Apis_filamentous-like	Viruses	NA	NA	NA	NA	NA	NA	NA	NA	NA	NA	NA	NA
54	Apis_filamentous-like	Cluster21733	8	QANH01000735.1:20041-20788(-):Harpegnathos_saltator	Harpegnathos_saltator	QANH01000735.1_20041-20788_-__Harpegnathos_saltator	QANH01000735.1:Harpegnathos_saltator	35	NA	NA	NA	NA	NA	YP_009165851	NA	33864	QANH01000735.1:Harpegnathos_saltator	35	13	31.2	241	155	0	9	249	167	392	4.92e-28	118	401	1100043	unclassified_viruses	Apis_mellifera_filamentous_virus	NA	Apis_filamentous-like	Apis_filamentous-like	Viruses	NA	NA	NA	NA	NA	NA	NA	NA	NA	NA	NA	NA
54	Apis_filamentous-like	Cluster21733	8	QANH01000747.1_2-HSPs_+__Harpegnathos_saltator	QANH01000747.1_2-HSPs_+__Harpegnathos_saltator	QANH01000747.1_2-HSPs_+__Harpegnathos_saltator	QANH01000747.1:Harpegnathos_saltator	NA	NA	NA	NA	NA	NA	YP_009165851	NA	34095	QANH01000747.1:Harpegnathos_saltator	33	52	29.3	141	98	0	4	144	226	364	3.084e-11	64	401	1100043	unclassified_viruses	Apis_mellifera_filamentous_virus	NA	Apis_filamentous-like	Apis_filamentous-like	Viruses	NA	NA	NA	NA	NA	NA	NA	NA	NA	NA	NA	NA
54	Apis_filamentous-like	Cluster21733	8	QANH01000762.1:19146-19521(-):Harpegnathos_saltator	Harpegnathos_saltator	QANH01000762.1_19146-19521_-__Harpegnathos_saltator	QANH01000762.1:Harpegnathos_saltator	57	NA	NA	NA	NA	NA	YP_009165851	NA	34305	QANH01000762.1:Harpegnathos_saltator	57	27	40	116	68	0	1	115	183	298	5.745e-18	83	401	1100043	unclassified_viruses	Apis_mellifera_filamentous_virus	NA	Apis_filamentous-like	Apis_filamentous-like	Viruses	NA	NA	NA	NA	NA	NA	NA	NA	NA	NA	NA	NA
54	Apis_filamentous-like	Cluster21733	8	QANH01000766.1:23498-23867(-):Harpegnathos_saltator	Harpegnathos_saltator	QANH01000766.1_23498-23867_-__Harpegnathos_saltator	QANH01000766.1:Harpegnathos_saltator	31	NA	NA	NA	NA	NA	YP_009345656	NA	34545	QANH01000766.1:Harpegnathos_saltator	31	22	36.3	98	57	0	1	98	179	269	9.479e-11	62	373	552509	unclassified_viruses	Leptopilina_boulardi_filamentous_virus	NA	LbFV_like	Apis_filamentous-like	Viruses	NA	NA	NA	NA	NA	NA	NA	NA	NA	NA	NA	NA
54	Apis_filamentous-like	Cluster21733	8	QANH01000766.1:34027-34771(-):Harpegnathos_saltator	Harpegnathos_saltator	QANH01000766.1_34027-34771_-__Harpegnathos_saltator	QANH01000766.1:Harpegnathos_saltator	31	NA	NA	NA	NA	NA	YP_009165851	NA	34510	QANH01000766.1:Harpegnathos_saltator	31	22	36	243	150	0	6	248	71	305	6.62e-38	147	401	1100043	unclassified_viruses	Apis_mellifera_filamentous_virus	NA	Apis_filamentous-like	Apis_filamentous-like	Viruses	NA	NA	NA	NA	NA	NA	NA	NA	NA	NA	NA	NA
54	Apis_filamentous-like	Cluster21733	8	QANH01000777.1:9501-10692(-):Harpegnathos_saltator	Harpegnathos_saltator	QANH01000777.1_9501-10692_-__Harpegnathos_saltator	QANH01000777.1:Harpegnathos_saltator	6	NA	NA	NA	NA	NA	YP_009165851	NA	34561	QANH01000777.1:Harpegnathos_saltator	6	9	30.3	333	225	0	65	397	69	392	1.089e-38	154	401	1100043	unclassified_viruses	Apis_mellifera_filamentous_virus	NA	Apis_filamentous-like	Apis_filamentous-like	Viruses	NA	NA	NA	NA	NA	NA	NA	NA	NA	NA	NA	NA
54	Apis_filamentous-like	Cluster21733	8	QANH01000823.1:7007-7658(+):Harpegnathos_saltator	Harpegnathos_saltator	QANH01000823.1_7007-7658_+__Harpegnathos_saltator	QANH01000823.1:Harpegnathos_saltator	NA	NA	NA	NA	NA	NA	YP_009165851	NA	34849	QANH01000823.1:Harpegnathos_saltator	26	14	27.4	216	145	0	2	217	192	392	7.675e-18	87	401	1100043	unclassified_viruses	Apis_mellifera_filamentous_virus	NA	Apis_filamentous-like	Apis_filamentous-like	Viruses	NA	NA	NA	NA	NA	NA	NA	NA	NA	NA	NA	NA
54	Apis_filamentous-like	Cluster22358	1	QANH01000169.1:682658-683132(-):Harpegnathos_saltator	Harpegnathos_saltator	QANH01000169.1_682658-683132_-__Harpegnathos_saltator	QANH01000169.1:Harpegnathos_saltator	53	NA	NA	NA	NA	NA	YP_009165793	NA	29447	QANH01000169.1:Harpegnathos_saltator	53	65	32.8	159	106	0	1	158	316	474	3.034e-18	85	550	1100043	unclassified_viruses	Apis_mellifera_filamentous_virus	NA	Apis_filamentous-like	Apis_filamentous-like	Viruses	NA	NA	NA	NA	NA	NA	NA	NA	NA	NA	NA	NA
54	Apis_filamentous-like	Cluster22358	10	QANH01000029.1:169768-170242(+):Harpegnathos_saltator	Harpegnathos_saltator	QANH01000029.1_169768-170242_+__Harpegnathos_saltator	QANH01000029.1:Harpegnathos_saltator	133	NA	NA	NA	NA	NA	YP_009165793	NA	25532	QANH01000029.1:Harpegnathos_saltator	133	74	33.7	159	104	0	1	158	316	474	2.473e-19	89	550	1100043	unclassified_viruses	Apis_mellifera_filamentous_virus	NA	Apis_filamentous-like	Apis_filamentous-like	Viruses	NA	NA	NA	NA	NA	NA	NA	NA	NA	NA	NA	NA
54	Apis_filamentous-like	Cluster22358	10	QANH01000030.1:139014-139479(-):Harpegnathos_saltator	Harpegnathos_saltator	QANH01000030.1_139014-139479_-__Harpegnathos_saltator	QANH01000030.1:Harpegnathos_saltator	475	NA	NA	NA	NA	NA	YP_009165793	NA	25708	QANH01000030.1:Harpegnathos_saltator	475	176	32.2	159	104	0	1	155	316	474	1.787e-17	83	550	1100043	unclassified_viruses	Apis_mellifera_filamentous_virus	NA	Apis_filamentous-like	Apis_filamentous-like	Viruses	NA	NA	NA	NA	NA	NA	NA	NA	NA	NA	NA	NA
54	Apis_filamentous-like	Cluster22358	10	QANH01000124.1:93860-94334(+):Harpegnathos_saltator	Harpegnathos_saltator	QANH01000124.1_93860-94334_+__Harpegnathos_saltator	QANH01000124.1:Harpegnathos_saltator	37	NA	NA	NA	NA	NA	YP_009165793	NA	28250	QANH01000124.1:Harpegnathos_saltator	37	29	32.6	159	106	0	1	158	316	474	5.677e-18	85	550	1100043	unclassified_viruses	Apis_mellifera_filamentous_virus	NA	Apis_filamentous-like	Apis_filamentous-like	Viruses	NA	NA	NA	NA	NA	NA	NA	NA	NA	NA	NA	NA
54	Apis_filamentous-like	Cluster22358	10	QANH01000271.1:64045-64654(-):Harpegnathos_saltator	Harpegnathos_saltator	QANH01000271.1_64045-64654_-__Harpegnathos_saltator	QANH01000271.1:Harpegnathos_saltator	15	NA	NA	NA	NA	NA	YP_009165793	NA	30561	QANH01000271.1:Harpegnathos_saltator	15	10	29	207	143	0	1	203	268	474	1.704e-19	91	550	1100043	unclassified_viruses	Apis_mellifera_filamentous_virus	NA	Apis_filamentous-like	Apis_filamentous-like	Viruses	NA	NA	NA	NA	NA	NA	NA	NA	NA	NA	NA	NA
54	Apis_filamentous-like	Cluster22358	10	QANH01000364.1:16552-16993(+):Harpegnathos_saltator	Harpegnathos_saltator	QANH01000364.1_16552-16993_+__Harpegnathos_saltator	QANH01000364.1:Harpegnathos_saltator	134	NA	NA	NA	NA	NA	YP_009165793	NA	31162	QANH01000364.1:Harpegnathos_saltator	134	61	32.4	148	99	0	1	147	316	463	5.775e-16	78	550	1100043	unclassified_viruses	Apis_mellifera_filamentous_virus	NA	Apis_filamentous-like	Apis_filamentous-like	Viruses	NA	NA	NA	NA	NA	NA	NA	NA	NA	NA	NA	NA
54	Apis_filamentous-like	Cluster22358	10	QANH01000436.1:12334-12808(+):Harpegnathos_saltator	Harpegnathos_saltator	QANH01000436.1_12334-12808_+__Harpegnathos_saltator	QANH01000436.1:Harpegnathos_saltator	56	NA	NA	NA	NA	NA	YP_009165793	NA	31806	QANH01000436.1:Harpegnathos_saltator	56	33	33.3	159	105	0	1	158	316	474	8.665e-19	87	550	1100043	unclassified_viruses	Apis_mellifera_filamentous_virus	NA	Apis_filamentous-like	Apis_filamentous-like	Viruses	NA	NA	NA	NA	NA	NA	NA	NA	NA	NA	NA	NA
54	Apis_filamentous-like	Cluster22358	11	QANH01000138.1:156672-157167(-):Harpegnathos_saltator	Harpegnathos_saltator	QANH01000138.1_156672-157167_-__Harpegnathos_saltator	QANH01000138.1:Harpegnathos_saltator	81	NA	NA	NA	NA	NA	YP_009165793	NA	28855	QANH01000138.1:Harpegnathos_saltator	81	54	28.5	165	115	0	1	165	316	477	2.139e-13	72	550	1100043	unclassified_viruses	Apis_mellifera_filamentous_virus	NA	Apis_filamentous-like	Apis_filamentous-like	Viruses	NA	NA	NA	NA	NA	NA	NA	NA	NA	NA	NA	NA
54	Apis_filamentous-like	Cluster22358	11	QANH01000586.1:12703-13189(+):Harpegnathos_saltator	Harpegnathos_saltator	QANH01000586.1_12703-13189_+__Harpegnathos_saltator	QANH01000586.1:Harpegnathos_saltator	41	NA	NA	NA	NA	NA	YP_009165793	NA	32914	QANH01000586.1:Harpegnathos_saltator	41	21	32.1	162	107	0	1	162	316	474	8.932e-18	84	550	1100043	unclassified_viruses	Apis_mellifera_filamentous_virus	NA	Apis_filamentous-like	Apis_filamentous-like	Viruses	NA	NA	NA	NA	NA	NA	NA	NA	NA	NA	NA	NA
54	Apis_filamentous-like	Cluster22358	12	QANH01000015.1:149054-149582(-):Harpegnathos_saltator	Harpegnathos_saltator	QANH01000015.1_149054-149582_-__Harpegnathos_saltator	QANH01000015.1:Harpegnathos_saltator	488	NA	NA	NA	NA	NA	YP_009165793	NA	24962	QANH01000015.1:Harpegnathos_saltator	488	229	25.4	176	109	0	1	176	317	463	2.666e-10	63	550	1100043	unclassified_viruses	Apis_mellifera_filamentous_virus	NA	Apis_filamentous-like	Apis_filamentous-like	Viruses	NA	NA	NA	NA	NA	NA	NA	NA	NA	NA	NA	NA
54	Apis_filamentous-like	Cluster22358	12	QANH01000036.1:149421-149985(-):Harpegnathos_saltator	Harpegnathos_saltator	QANH01000036.1_149421-149985_-__Harpegnathos_saltator	QANH01000036.1:Harpegnathos_saltator	95	NA	NA	NA	NA	NA	YP_009165793	NA	25992	QANH01000036.1:Harpegnathos_saltator	95	68	26.2	176	108	0	13	188	317	463	2.294e-11	66	550	1100043	unclassified_viruses	Apis_mellifera_filamentous_virus	NA	Apis_filamentous-like	Apis_filamentous-like	Viruses	NA	NA	NA	NA	NA	NA	NA	NA	NA	NA	NA	NA
54	Apis_filamentous-like	Cluster22358	12	QANH01000058.1:66162-66768(+):Harpegnathos_saltator	Harpegnathos_saltator	QANH01000058.1_66162-66768_+__Harpegnathos_saltator	QANH01000058.1:Harpegnathos_saltator	41	NA	NA	NA	NA	NA	YP_009165793	NA	26674	QANH01000058.1:Harpegnathos_saltator	41	42	26.8	202	126	0	1	202	305	477	2.406e-15	79	550	1100043	unclassified_viruses	Apis_mellifera_filamentous_virus	NA	Apis_filamentous-like	Apis_filamentous-like	Viruses	NA	NA	NA	NA	NA	NA	NA	NA	NA	NA	NA	NA
54	Apis_filamentous-like	Cluster22358	12	QANH01000067.1:18314-18866(+):Harpegnathos_saltator	Harpegnathos_saltator	QANH01000067.1_18314-18866_+__Harpegnathos_saltator	QANH01000067.1:Harpegnathos_saltator	370	NA	NA	NA	NA	NA	YP_009165793	NA	26829	QANH01000067.1:Harpegnathos_saltator	370	142	27.2	184	114	0	1	184	306	463	8.016e-14	74	550	1100043	unclassified_viruses	Apis_mellifera_filamentous_virus	NA	Apis_filamentous-like	Apis_filamentous-like	Viruses	NA	NA	NA	NA	NA	NA	NA	NA	NA	NA	NA	NA
54	Apis_filamentous-like	Cluster22358	12	QANH01000121.1:62384-62915(-):Harpegnathos_saltator	Harpegnathos_saltator	QANH01000121.1_62384-62915_-__Harpegnathos_saltator	QANH01000121.1:Harpegnathos_saltator	11	NA	NA	NA	NA	NA	YP_009165793	NA	28125	QANH01000121.1:Harpegnathos_saltator	11	15	25.8	177	108	0	1	177	317	463	5.87e-11	65	550	1100043	unclassified_viruses	Apis_mellifera_filamentous_virus	NA	Apis_filamentous-like	Apis_filamentous-like	Viruses	NA	NA	NA	NA	NA	NA	NA	NA	NA	NA	NA	NA
54	Apis_filamentous-like	Cluster22358	12	QANH01000215.1:14625-15147(-):Harpegnathos_saltator	Harpegnathos_saltator	QANH01000215.1_14625-15147_-__Harpegnathos_saltator	QANH01000215.1:Harpegnathos_saltator	14	NA	NA	NA	NA	NA	YP_009165793	NA	30054	QANH01000215.1:Harpegnathos_saltator	14	13	28.4	174	103	0	1	174	319	463	2.351e-14	75	550	1100043	unclassified_viruses	Apis_mellifera_filamentous_virus	NA	Apis_filamentous-like	Apis_filamentous-like	Viruses	NA	NA	NA	NA	NA	NA	NA	NA	NA	NA	NA	NA
54	Apis_filamentous-like	Cluster22358	12	QANH01000215.1:24709-25231(-):Harpegnathos_saltator	Harpegnathos_saltator	QANH01000215.1_24709-25231_-__Harpegnathos_saltator	QANH01000215.1:Harpegnathos_saltator	14	NA	NA	NA	NA	NA	YP_009165793	NA	30055	QANH01000215.1:Harpegnathos_saltator	14	13	28.4	174	103	0	1	174	319	463	2.351e-14	75	550	1100043	unclassified_viruses	Apis_mellifera_filamentous_virus	NA	Apis_filamentous-like	Apis_filamentous-like	Viruses	NA	NA	NA	NA	NA	NA	NA	NA	NA	NA	NA	NA
54	Apis_filamentous-like	Cluster22358	12	QANH01000782.1:20835-21432(-):Harpegnathos_saltator	Harpegnathos_saltator	QANH01000782.1_20835-21432_-__Harpegnathos_saltator	QANH01000782.1:Harpegnathos_saltator	12	NA	NA	NA	NA	NA	YP_009165793	NA	34693	QANH01000782.1:Harpegnathos_saltator	12	24	29.1	187	111	0	13	199	317	474	7.404e-17	83	550	1100043	unclassified_viruses	Apis_mellifera_filamentous_virus	NA	Apis_filamentous-like	Apis_filamentous-like	Viruses	NA	NA	NA	NA	NA	NA	NA	NA	NA	NA	NA	NA
54	Apis_filamentous-like	Cluster22358	2	QANH01000029.1:12567-13053(+):Harpegnathos_saltator	Harpegnathos_saltator	QANH01000029.1_12567-13053_+__Harpegnathos_saltator	QANH01000029.1:Harpegnathos_saltator	133	NA	NA	NA	NA	NA	YP_009165793	NA	25531	QANH01000029.1:Harpegnathos_saltator	133	74	30.7	162	112	0	1	162	316	477	7.102e-16	79	550	1100043	unclassified_viruses	Apis_mellifera_filamentous_virus	NA	Apis_filamentous-like	Apis_filamentous-like	Viruses	NA	NA	NA	NA	NA	NA	NA	NA	NA	NA	NA	NA
54	Apis_filamentous-like	Cluster22358	9	QANH01000046.1:2166040-2166514(-):Harpegnathos_saltator	Harpegnathos_saltator	QANH01000046.1_2166040-2166514_-__Harpegnathos_saltator	QANH01000046.1:Harpegnathos_saltator	364	NA	NA	NA	NA	NA	YP_009165793	NA	26450	QANH01000046.1:Harpegnathos_saltator	364	211	28.9	159	112	0	1	158	316	474	4.362e-13	70	550	1100043	unclassified_viruses	Apis_mellifera_filamentous_virus	NA	Apis_filamentous-like	Apis_filamentous-like	Viruses	NA	NA	NA	NA	NA	NA	NA	NA	NA	NA	NA	NA
54	Apis_filamentous-like	Cluster22358	9	QANH01000063.1:26638-27085(+):Harpegnathos_saltator	Harpegnathos_saltator	QANH01000063.1_26638-27085_+__Harpegnathos_saltator	QANH01000063.1:Harpegnathos_saltator	27	NA	NA	NA	NA	NA	YP_009165793	NA	26697	QANH01000063.1:Harpegnathos_saltator	27	19	28.5	149	100	0	1	149	305	445	2.569e-11	65	550	1100043	unclassified_viruses	Apis_mellifera_filamentous_virus	NA	Apis_filamentous-like	Apis_filamentous-like	Viruses	NA	NA	NA	NA	NA	NA	NA	NA	NA	NA	NA	NA
54	Apis_filamentous-like	Cluster22358	9	QANH01000106.1:13755-14289(-):Harpegnathos_saltator	Harpegnathos_saltator	QANH01000106.1_13755-14289_-__Harpegnathos_saltator	QANH01000106.1:Harpegnathos_saltator	11	NA	NA	NA	NA	NA	YP_009165793	NA	27790	QANH01000106.1:Harpegnathos_saltator	11	6	31.8	178	115	0	1	178	305	474	7.623e-20	91	550	1100043	unclassified_viruses	Apis_mellifera_filamentous_virus	NA	Apis_filamentous-like	Apis_filamentous-like	Viruses	NA	NA	NA	NA	NA	NA	NA	NA	NA	NA	NA	NA
54	Apis_filamentous-like	Cluster22358	9	QANH01000132.1:7457-7922(-):Harpegnathos_saltator	Harpegnathos_saltator	QANH01000132.1_7457-7922_-__Harpegnathos_saltator	QANH01000132.1:Harpegnathos_saltator	7	NA	NA	NA	NA	NA	YP_009165793	NA	28796	QANH01000132.1:Harpegnathos_saltator	7	21	32	155	99	0	1	155	329	474	1.6e-16	80	550	1100043	unclassified_viruses	Apis_mellifera_filamentous_virus	NA	Apis_filamentous-like	Apis_filamentous-like	Viruses	NA	NA	NA	NA	NA	NA	NA	NA	NA	NA	NA	NA
54	Apis_filamentous-like	Cluster22358	9	QANH01000280.1:75482-76016(+):Harpegnathos_saltator	Harpegnathos_saltator	QANH01000280.1_75482-76016_+__Harpegnathos_saltator	QANH01000280.1:Harpegnathos_saltator	74	NA	NA	NA	NA	NA	YP_009165793	NA	30654	QANH01000280.1:Harpegnathos_saltator	74	42	31.5	178	116	0	1	178	305	474	2.656e-19	89	550	1100043	unclassified_viruses	Apis_mellifera_filamentous_virus	NA	Apis_filamentous-like	Apis_filamentous-like	Viruses	NA	NA	NA	NA	NA	NA	NA	NA	NA	NA	NA	NA
54	Apis_filamentous-like	Cluster22358	9	QANH01000523.1:180360-180894(+):Harpegnathos_saltator	Harpegnathos_saltator	QANH01000523.1_180360-180894_+__Harpegnathos_saltator	QANH01000523.1:Harpegnathos_saltator	94	NA	NA	NA	NA	NA	YP_009165793	NA	32440	QANH01000523.1:Harpegnathos_saltator	94	54	30.5	178	117	0	1	178	305	474	6.004e-18	85	550	1100043	unclassified_viruses	Apis_mellifera_filamentous_virus	NA	Apis_filamentous-like	Apis_filamentous-like	Viruses	NA	NA	NA	NA	NA	NA	NA	NA	NA	NA	NA	NA
54	Apis_filamentous-like	Cluster22359	2	QANH01000089.1:115265-116063(+):Harpegnathos_saltator	Harpegnathos_saltator	QANH01000089.1_115265-116063_+__Harpegnathos_saltator	QANH01000089.1:Harpegnathos_saltator	71	NA	NA	NA	NA	NA	YP_009165808	NA	27517	QANH01000089.1:Harpegnathos_saltator	71	47	21.5	266	185	0	1	266	89	325	2.493e-11	68	331	1100043	unclassified_viruses	Apis_mellifera_filamentous_virus	NA	Apis_filamentous-like	Apis_filamentous-like	Viruses	NA	NA	NA	NA	NA	NA	NA	NA	NA	NA	NA	NA
54	Apis_filamentous-like	Cluster22359	2	QANH01000089.1:152475-153240(+):Harpegnathos_saltator	Harpegnathos_saltator	QANH01000089.1_152475-153240_+__Harpegnathos_saltator	QANH01000089.1:Harpegnathos_saltator	71	NA	NA	NA	NA	NA	YP_009165808	NA	27514	QANH01000089.1:Harpegnathos_saltator	71	47	21.8	230	167	0	1	230	89	302	3.232e-09	62	331	1100043	unclassified_viruses	Apis_mellifera_filamentous_virus	NA	Apis_filamentous-like	Apis_filamentous-like	Viruses	NA	NA	NA	NA	NA	NA	NA	NA	NA	NA	NA	NA
54	Apis_filamentous-like	Cluster22359	2	QANH01000132.1:80579-81482(+):Harpegnathos_saltator	Harpegnathos_saltator	QANH01000132.1_80579-81482_+__Harpegnathos_saltator	QANH01000132.1:Harpegnathos_saltator	7	NA	NA	NA	NA	NA	YP_009165808	NA	28797	QANH01000132.1:Harpegnathos_saltator	7	21	20.1	271	192	0	1	271	60	300	1.346e-08	61	331	1100043	unclassified_viruses	Apis_mellifera_filamentous_virus	NA	Apis_filamentous-like	Apis_filamentous-like	Viruses	NA	NA	NA	NA	NA	NA	NA	NA	NA	NA	NA	NA
54	Apis_filamentous-like	Cluster22359	2	QANH01000223.1:39027-39756(+):Harpegnathos_saltator	Harpegnathos_saltator	QANH01000223.1_39027-39756_+__Harpegnathos_saltator	QANH01000223.1:Harpegnathos_saltator	65	NA	NA	NA	NA	NA	YP_009165808	NA	30251	QANH01000223.1:Harpegnathos_saltator	65	54	21.5	243	173	0	1	243	89	309	1.103e-09	63	331	1100043	unclassified_viruses	Apis_mellifera_filamentous_virus	NA	Apis_filamentous-like	Apis_filamentous-like	Viruses	NA	NA	NA	NA	NA	NA	NA	NA	NA	NA	NA	NA
54	Apis_filamentous-like	Cluster22359	2	QANH01000227.1:47471-48005(+):Harpegnathos_saltator	Harpegnathos_saltator	QANH01000227.1_47471-48005_+__Harpegnathos_saltator	QANH01000227.1:Harpegnathos_saltator	3	NA	NA	NA	NA	NA	YP_009165808	NA	30255	QANH01000227.1:Harpegnathos_saltator	3	8	24.8	178	130	0	1	178	85	258	9.606e-10	61	331	1100043	unclassified_viruses	Apis_mellifera_filamentous_virus	NA	Apis_filamentous-like	Apis_filamentous-like	Viruses	NA	NA	NA	NA	NA	NA	NA	NA	NA	NA	NA	NA
54	Apis_filamentous-like	Cluster22359	2	QANH01000524.1:55881-56415(-):Harpegnathos_saltator	Harpegnathos_saltator	QANH01000524.1_55881-56415_-__Harpegnathos_saltator	QANH01000524.1:Harpegnathos_saltator	33	NA	NA	NA	NA	NA	YP_009165808	NA	32442	QANH01000524.1:Harpegnathos_saltator	33	20	24.8	178	130	0	1	178	85	258	9.606e-10	61	331	1100043	unclassified_viruses	Apis_mellifera_filamentous_virus	NA	Apis_filamentous-like	Apis_filamentous-like	Viruses	NA	NA	NA	NA	NA	NA	NA	NA	NA	NA	NA	NA
54	Apis_filamentous-like	Cluster22359	2	QANH01000728.1:134500-135151(-):Harpegnathos_saltator	Harpegnathos_saltator	QANH01000728.1_134500-135151_-__Harpegnathos_saltator	QANH01000728.1:Harpegnathos_saltator	68	NA	NA	NA	NA	NA	YP_009165808	NA	33741	QANH01000728.1:Harpegnathos_saltator	68	49	25.6	185	124	0	5	189	142	308	3.35e-11	67	331	1100043	unclassified_viruses	Apis_mellifera_filamentous_virus	NA	Apis_filamentous-like	Apis_filamentous-like	Viruses	NA	NA	NA	NA	NA	NA	NA	NA	NA	NA	NA	NA
54	Apis_filamentous-like	Cluster27203	7	QANH01000036.1:63877-65278(+):Harpegnathos_saltator	Harpegnathos_saltator	QANH01000036.1_63877-65278_+__Harpegnathos_saltator	QANH01000036.1:Harpegnathos_saltator	95	NA	NA	NA	NA	NA	YP_009165825	NA	25995	QANH01000036.1:Harpegnathos_saltator	95	68	18.1	555	382	0	1	467	1156	1710	2.5e-18	93	1954	1100043	unclassified_viruses	Apis_mellifera_filamentous_virus	NA	Apis_filamentous-like	Apis_filamentous-like	Viruses	NA	NA	NA	NA	NA	NA	NA	NA	NA	NA	NA	NA
54	Apis_filamentous-like	Cluster27203	7	QANH01000162.1:293673-295461(-):Harpegnathos_saltator	Harpegnathos_saltator	QANH01000162.1_293673-295461_-__Harpegnathos_saltator	QANH01000162.1:Harpegnathos_saltator	119	NA	NA	NA	NA	NA	YP_009165825	NA	29106	QANH01000162.1:Harpegnathos_saltator	119	64	18.9	663	480	0	4	596	1132	1794	3.31e-27	123	1954	1100043	unclassified_viruses	Apis_mellifera_filamentous_virus	NA	Apis_filamentous-like	Apis_filamentous-like	Viruses	NA	NA	NA	NA	NA	NA	NA	NA	NA	NA	NA	NA
54	Apis_filamentous-like	Cluster27203	7	QANH01000728.1:92647-94105(+):Harpegnathos_saltator	Harpegnathos_saltator	QANH01000728.1_92647-94105_+__Harpegnathos_saltator	QANH01000728.1:Harpegnathos_saltator	68	NA	NA	NA	NA	NA	YP_009165825	NA	33600	QANH01000728.1:Harpegnathos_saltator	68	49	18.9	576	393	0	1	486	1135	1710	9.779e-23	108	1954	1100043	unclassified_viruses	Apis_mellifera_filamentous_virus	NA	Apis_filamentous-like	Apis_filamentous-like	Viruses	NA	NA	NA	NA	NA	NA	NA	NA	NA	NA	NA	NA
54	Apis_filamentous-like	Cluster27203	7	QANH01000747.1:145444-146830(+):Harpegnathos_saltator	Harpegnathos_saltator	QANH01000747.1_145444-146830_+__Harpegnathos_saltator	QANH01000747.1:Harpegnathos_saltator	50	NA	NA	NA	NA	NA	YP_009165825	NA	34077	QANH01000747.1:Harpegnathos_saltator	50	52	19.2	555	372	0	1	462	1156	1710	5.832e-23	108	1954	1100043	unclassified_viruses	Apis_mellifera_filamentous_virus	NA	Apis_filamentous-like	Apis_filamentous-like	Viruses	NA	NA	NA	NA	NA	NA	NA	NA	NA	NA	NA	NA
54	Apis_filamentous-like	Cluster3481	6	QANH01000041.1:2682-3447(+):Harpegnathos_saltator	Harpegnathos_saltator	QANH01000041.1_2682-3447_+__Harpegnathos_saltator	QANH01000041.1:Harpegnathos_saltator	25	NA	NA	NA	NA	NA	YP_009165874	NA	26277	QANH01000041.1:Harpegnathos_saltator	25	22	31.8	255	168	0	1	255	393	640	1.876e-31	128	947	1100043	unclassified_viruses	Apis_mellifera_filamentous_virus	NA	Apis_filamentous-like	Apis_filamentous-like	Viruses	NA	NA	NA	NA	NA	NA	NA	NA	NA	NA	NA	NA
54	Apis_filamentous-like	Cluster3481	6	QANH01000041.1:52710-53469(+):Harpegnathos_saltator	Harpegnathos_saltator	QANH01000041.1_52710-53469_+__Harpegnathos_saltator	QANH01000041.1:Harpegnathos_saltator	25	NA	NA	NA	NA	NA	YP_009165874	NA	26276	QANH01000041.1:Harpegnathos_saltator	25	22	30.9	253	171	0	1	253	393	640	1.844e-29	122	947	1100043	unclassified_viruses	Apis_mellifera_filamentous_virus	NA	Apis_filamentous-like	Apis_filamentous-like	Viruses	NA	NA	NA	NA	NA	NA	NA	NA	NA	NA	NA	NA
54	Apis_filamentous-like	Cluster3481	6	QANH01000046.1:2130476-2131232(-):Harpegnathos_saltator	Harpegnathos_saltator	QANH01000046.1_2130476-2131232_-__Harpegnathos_saltator	QANH01000046.1:Harpegnathos_saltator	364	NA	NA	NA	NA	NA	YP_009165874	NA	26451	QANH01000046.1:Harpegnathos_saltator	364	211	32.6	252	164	0	1	252	393	637	1.042e-32	132	947	1100043	unclassified_viruses	Apis_mellifera_filamentous_virus	NA	Apis_filamentous-like	Apis_filamentous-like	Viruses	NA	NA	NA	NA	NA	NA	NA	NA	NA	NA	NA	NA
54	Apis_filamentous-like	Cluster3481	6	QANH01000124.1:141885-142722(+):Harpegnathos_saltator	Harpegnathos_saltator	QANH01000124.1_141885-142722_+__Harpegnathos_saltator	QANH01000124.1:Harpegnathos_saltator	37	NA	NA	NA	NA	NA	YP_009165874	NA	28523	QANH01000124.1:Harpegnathos_saltator	37	29	30.3	279	186	0	1	279	373	640	8.334e-32	130	947	1100043	unclassified_viruses	Apis_mellifera_filamentous_virus	NA	Apis_filamentous-like	Apis_filamentous-like	Viruses	NA	NA	NA	NA	NA	NA	NA	NA	NA	NA	NA	NA
54	Apis_filamentous-like	Cluster3481	6	QANH01000132.1:90225-90957(-):Harpegnathos_saltator	Harpegnathos_saltator	QANH01000132.1_90225-90957_-__Harpegnathos_saltator	QANH01000132.1:Harpegnathos_saltator	7	NA	NA	NA	NA	NA	YP_009165874	NA	28799	QANH01000132.1:Harpegnathos_saltator	7	21	24.5	248	183	0	1	244	375	622	5.97e-16	82	947	1100043	unclassified_viruses	Apis_mellifera_filamentous_virus	NA	Apis_filamentous-like	Apis_filamentous-like	Viruses	NA	NA	NA	NA	NA	NA	NA	NA	NA	NA	NA	NA
54	Apis_filamentous-like	Cluster3481	6	QANH01000169.1:713935-714739(-):Harpegnathos_saltator	Harpegnathos_saltator	QANH01000169.1_713935-714739_-__Harpegnathos_saltator	QANH01000169.1:Harpegnathos_saltator	53	NA	NA	NA	NA	NA	YP_009165874	NA	29452	QANH01000169.1:Harpegnathos_saltator	53	65	27.9	271	193	0	1	268	371	641	1.619e-25	111	947	1100043	unclassified_viruses	Apis_mellifera_filamentous_virus	NA	Apis_filamentous-like	Apis_filamentous-like	Viruses	NA	NA	NA	NA	NA	NA	NA	NA	NA	NA	NA	NA
54	Apis_filamentous-like	Cluster3481	6	QANH01000219.1:49347-50139(-):Harpegnathos_saltator	Harpegnathos_saltator	QANH01000219.1_49347-50139_-__Harpegnathos_saltator	QANH01000219.1:Harpegnathos_saltator	58	NA	NA	NA	NA	NA	YP_009165874	NA	30132	QANH01000219.1:Harpegnathos_saltator	58	56	26.4	269	194	0	1	264	379	647	5.75e-22	100	947	1100043	unclassified_viruses	Apis_mellifera_filamentous_virus	NA	Apis_filamentous-like	Apis_filamentous-like	Viruses	NA	NA	NA	NA	NA	NA	NA	NA	NA	NA	NA	NA
54	Apis_filamentous-like	Cluster3481	6	QANH01000254.1:22880-23702(+):Harpegnathos_saltator	Harpegnathos_saltator	QANH01000254.1_22880-23702_+__Harpegnathos_saltator	QANH01000254.1:Harpegnathos_saltator	13	NA	NA	NA	NA	NA	YP_009165874	NA	30273	QANH01000254.1:Harpegnathos_saltator	13	14	28.8	280	194	0	1	274	346	625	1.185e-28	121	947	1100043	unclassified_viruses	Apis_mellifera_filamentous_virus	NA	Apis_filamentous-like	Apis_filamentous-like	Viruses	NA	NA	NA	NA	NA	NA	NA	NA	NA	NA	NA	NA
54	Apis_filamentous-like	Cluster3481	6	QANH01000254.1:35318-36140(+):Harpegnathos_saltator	Harpegnathos_saltator	QANH01000254.1_35318-36140_+__Harpegnathos_saltator	QANH01000254.1:Harpegnathos_saltator	13	NA	NA	NA	NA	NA	YP_009165874	NA	30274	QANH01000254.1:Harpegnathos_saltator	13	14	28.8	280	194	0	1	274	346	625	1.185e-28	121	947	1100043	unclassified_viruses	Apis_mellifera_filamentous_virus	NA	Apis_filamentous-like	Apis_filamentous-like	Viruses	NA	NA	NA	NA	NA	NA	NA	NA	NA	NA	NA	NA
54	Apis_filamentous-like	Cluster3481	6	QANH01000283.1:28696-29446(+):Harpegnathos_saltator	Harpegnathos_saltator	QANH01000283.1_28696-29446_+__Harpegnathos_saltator	QANH01000283.1:Harpegnathos_saltator	8	NA	NA	NA	NA	NA	YP_009165874	NA	30787	QANH01000283.1:Harpegnathos_saltator	8	21	32.3	248	165	0	1	248	394	637	1.599e-31	128	947	1100043	unclassified_viruses	Apis_mellifera_filamentous_virus	NA	Apis_filamentous-like	Apis_filamentous-like	Viruses	NA	NA	NA	NA	NA	NA	NA	NA	NA	NA	NA	NA
54	Apis_filamentous-like	Cluster3481	6	QANH01000283.1:77317-78115(+):Harpegnathos_saltator	Harpegnathos_saltator	QANH01000283.1_77317-78115_+__Harpegnathos_saltator	QANH01000283.1:Harpegnathos_saltator	8	NA	NA	NA	NA	NA	YP_009165874	NA	30788	QANH01000283.1:Harpegnathos_saltator	8	21	30.6	269	184	0	1	266	356	624	4.907e-31	127	947	1100043	unclassified_viruses	Apis_mellifera_filamentous_virus	NA	Apis_filamentous-like	Apis_filamentous-like	Viruses	NA	NA	NA	NA	NA	NA	NA	NA	NA	NA	NA	NA
54	Apis_filamentous-like	Cluster3481	6	QANH01000580.1:2405-3278(+):Harpegnathos_saltator	Harpegnathos_saltator	QANH01000580.1_2405-3278_+__Harpegnathos_saltator	QANH01000580.1:Harpegnathos_saltator	606	NA	NA	NA	NA	NA	YP_009165874	NA	32805	QANH01000580.1:Harpegnathos_saltator	606	199	29.9	291	202	0	1	289	347	637	1.367e-32	133	947	1100043	unclassified_viruses	Apis_mellifera_filamentous_virus	NA	Apis_filamentous-like	Apis_filamentous-like	Viruses	NA	NA	NA	NA	NA	NA	NA	NA	NA	NA	NA	NA
54	Apis_filamentous-like	Cluster3481	6	QANH01000621.1:50441-51269(-):Harpegnathos_saltator	Harpegnathos_saltator	QANH01000621.1_50441-51269_-__Harpegnathos_saltator	QANH01000621.1:Harpegnathos_saltator	30	NA	NA	NA	NA	NA	YP_009165874	NA	32940	QANH01000621.1:Harpegnathos_saltator	30	12	29.4	278	194	0	1	276	347	624	1.066e-29	124	947	1100043	unclassified_viruses	Apis_mellifera_filamentous_virus	NA	Apis_filamentous-like	Apis_filamentous-like	Viruses	NA	NA	NA	NA	NA	NA	NA	NA	NA	NA	NA	NA
54	Apis_filamentous-like	Cluster3481	6	QANH01000728.1:66849-67653(-):Harpegnathos_saltator	Harpegnathos_saltator	QANH01000728.1_66849-67653_-__Harpegnathos_saltator	QANH01000728.1:Harpegnathos_saltator	68	NA	NA	NA	NA	NA	YP_009165874	NA	33785	QANH01000728.1:Harpegnathos_saltator	68	49	31	267	181	0	1	264	371	637	1.513e-31	129	947	1100043	unclassified_viruses	Apis_mellifera_filamentous_virus	NA	Apis_filamentous-like	Apis_filamentous-like	Viruses	NA	NA	NA	NA	NA	NA	NA	NA	NA	NA	NA	NA
54	Apis_filamentous-like	Cluster3481	6	QANH01000737.1:44589-45435(+):Harpegnathos_saltator	Harpegnathos_saltator	QANH01000737.1_44589-45435_+__Harpegnathos_saltator	QANH01000737.1:Harpegnathos_saltator	10	NA	NA	NA	NA	NA	YP_009165874	NA	34000	QANH01000737.1:Harpegnathos_saltator	10	12	28.7	282	199	0	1	280	356	637	1.092e-28	121	947	1100043	unclassified_viruses	Apis_mellifera_filamentous_virus	NA	Apis_filamentous-like	Apis_filamentous-like	Viruses	NA	NA	NA	NA	NA	NA	NA	NA	NA	NA	NA	NA
54	Apis_filamentous-like	Cluster3481	6	QANH01000747.1:79776-80670(-):Harpegnathos_saltator	Harpegnathos_saltator	QANH01000747.1_79776-80670_-__Harpegnathos_saltator	QANH01000747.1:Harpegnathos_saltator	50	NA	NA	NA	NA	NA	YP_009165874	NA	34094	QANH01000747.1:Harpegnathos_saltator	50	52	28.6	303	207	0	8	298	377	679	4.937e-31	128	947	1100043	unclassified_viruses	Apis_mellifera_filamentous_virus	NA	Apis_filamentous-like	Apis_filamentous-like	Viruses	NA	NA	NA	NA	NA	NA	NA	NA	NA	NA	NA	NA
54	Apis_filamentous-like	Cluster3481	6	QANH01000755.1:70434-71220(+):Harpegnathos_saltator	Harpegnathos_saltator	QANH01000755.1_70434-71220_+__Harpegnathos_saltator	QANH01000755.1:Harpegnathos_saltator	60	NA	NA	NA	NA	NA	YP_009165874	NA	34299	QANH01000755.1:Harpegnathos_saltator	60	23	30.2	265	182	0	1	262	371	635	9.591e-30	123	947	1100043	unclassified_viruses	Apis_mellifera_filamentous_virus	NA	Apis_filamentous-like	Apis_filamentous-like	Viruses	NA	NA	NA	NA	NA	NA	NA	NA	NA	NA	NA	NA
54	Apis_filamentous-like	Cluster3481	6	QANH01000782.1:128823-129591(+):Harpegnathos_saltator	Harpegnathos_saltator	QANH01000782.1_128823-129591_+__Harpegnathos_saltator	QANH01000782.1:Harpegnathos_saltator	12	NA	NA	NA	NA	NA	YP_009165874	NA	34767	QANH01000782.1:Harpegnathos_saltator	12	24	30	257	179	0	1	256	347	603	4.463e-28	118	947	1100043	unclassified_viruses	Apis_mellifera_filamentous_virus	NA	Apis_filamentous-like	Apis_filamentous-like	Viruses	NA	NA	NA	NA	NA	NA	NA	NA	NA	NA	NA	NA
54	Apis_filamentous-like	Cluster3481	6	QANH01000823.1:2531-3257(+):Harpegnathos_saltator	Harpegnathos_saltator	QANH01000823.1_2531-3257_+__Harpegnathos_saltator	QANH01000823.1:Harpegnathos_saltator	14	NA	NA	NA	NA	NA	YP_009165874	NA	34846	QANH01000823.1:Harpegnathos_saltator	14	14	29.2	242	164	0	1	242	373	605	1.689e-24	107	947	1100043	unclassified_viruses	Apis_mellifera_filamentous_virus	NA	Apis_filamentous-like	Apis_filamentous-like	Viruses	NA	NA	NA	NA	NA	NA	NA	NA	NA	NA	NA	NA
54	Apis_filamentous-like	Cluster3538	4	QANH01000025.1:179906-180455(+):Harpegnathos_saltator	Harpegnathos_saltator	QANH01000025.1_179906-180455_+__Harpegnathos_saltator	QANH01000025.1:Harpegnathos_saltator	40	NA	NA	NA	NA	NA	YP_009165916	NA	25262	QANH01000025.1:Harpegnathos_saltator	40	61	29.8	197	128	0	1	183	455	651	1.231e-19	91	700	1100043	unclassified_viruses	Apis_mellifera_filamentous_virus	NA	Apis_filamentous-like	Apis_filamentous-like	Viruses	NA	NA	NA	NA	NA	NA	NA	NA	NA	NA	NA	NA
54	Apis_filamentous-like	Cluster3538	4	QANH01000044.1:81977-82526(+):Harpegnathos_saltator	Harpegnathos_saltator	QANH01000044.1_81977-82526_+__Harpegnathos_saltator	QANH01000044.1:Harpegnathos_saltator	62	NA	NA	NA	NA	NA	YP_009165916	NA	26449	QANH01000044.1:Harpegnathos_saltator	62	42	33.2	197	122	0	1	183	455	651	4.605e-25	106	700	1100043	unclassified_viruses	Apis_mellifera_filamentous_virus	NA	Apis_filamentous-like	Apis_filamentous-like	Viruses	NA	NA	NA	NA	NA	NA	NA	NA	NA	NA	NA	NA
54	Apis_filamentous-like	Cluster3538	4	QANH01000058.1:13466-13973(+):Harpegnathos_saltator	Harpegnathos_saltator	QANH01000058.1_13466-13973_+__Harpegnathos_saltator	QANH01000058.1:Harpegnathos_saltator	41	NA	NA	NA	NA	NA	YP_009165916	NA	26694	QANH01000058.1:Harpegnathos_saltator	41	42	27.7	190	121	0	1	169	466	655	1.222e-15	78	700	1100043	unclassified_viruses	Apis_mellifera_filamentous_virus	NA	Apis_filamentous-like	Apis_filamentous-like	Viruses	NA	NA	NA	NA	NA	NA	NA	NA	NA	NA	NA	NA
54	Apis_filamentous-like	Cluster3538	4	QANH01000058.1:24705-25980(+):Harpegnathos_saltator	Harpegnathos_saltator	QANH01000058.1_24705-25980_+__Harpegnathos_saltator	QANH01000058.1:Harpegnathos_saltator	41	NA	NA	NA	NA	NA	YP_009165916	NA	26693	QANH01000058.1:Harpegnathos_saltator	41	42	17.7	525	349	0	1	425	127	651	2.29e-15	83	700	1100043	unclassified_viruses	Apis_mellifera_filamentous_virus	NA	Apis_filamentous-like	Apis_filamentous-like	Viruses	NA	NA	NA	NA	NA	NA	NA	NA	NA	NA	NA	NA
54	Apis_filamentous-like	Cluster3538	4	QANH01000065.1:121874-122540(-):Harpegnathos_saltator	Harpegnathos_saltator	QANH01000065.1_121874-122540_-__Harpegnathos_saltator	QANH01000065.1:Harpegnathos_saltator	47	NA	NA	NA	NA	NA	YP_009165916	NA	26827	QANH01000065.1:Harpegnathos_saltator	47	61	29.4	234	156	0	1	222	418	651	5.916e-24	105	700	1100043	unclassified_viruses	Apis_mellifera_filamentous_virus	NA	Apis_filamentous-like	Apis_filamentous-like	Viruses	NA	NA	NA	NA	NA	NA	NA	NA	NA	NA	NA	NA
54	Apis_filamentous-like	Cluster3538	4	QANH01000089.1:125062-125614(-):Harpegnathos_saltator	Harpegnathos_saltator	QANH01000089.1_125062-125614_-__Harpegnathos_saltator	QANH01000089.1:Harpegnathos_saltator	71	NA	NA	NA	NA	NA	YP_009165916	NA	27520	QANH01000089.1:Harpegnathos_saltator	71	47	31.5	197	125	0	1	184	455	651	2.48e-22	98	700	1100043	unclassified_viruses	Apis_mellifera_filamentous_virus	NA	Apis_filamentous-like	Apis_filamentous-like	Viruses	NA	NA	NA	NA	NA	NA	NA	NA	NA	NA	NA	NA
54	Apis_filamentous-like	Cluster3538	4	QANH01000110.1:857743-858283(-):Harpegnathos_saltator	Harpegnathos_saltator	QANH01000110.1_857743-858283_-__Harpegnathos_saltator	QANH01000110.1:Harpegnathos_saltator	423	NA	NA	NA	NA	NA	YP_009165916	NA	27833	QANH01000110.1:Harpegnathos_saltator	423	191	34.2	176	105	0	1	161	457	632	8.448e-23	100	700	1100043	unclassified_viruses	Apis_mellifera_filamentous_virus	NA	Apis_filamentous-like	Apis_filamentous-like	Viruses	NA	NA	NA	NA	NA	NA	NA	NA	NA	NA	NA	NA
54	Apis_filamentous-like	Cluster3538	4	QANH01000114.1_1:316220-316754(+):Harpegnathos_saltator	Harpegnathos_saltator	QANH01000114.1_1_316220-316754_+__Harpegnathos_saltator	QANH01000114.1_1:Harpegnathos_saltator	67	NA	NA	NA	NA	NA	YP_009165916	NA	28008	QANH01000114.1_1:Harpegnathos_saltator	67	50	33.5	176	105	0	1	159	457	632	7.029e-22	97	700	1100043	unclassified_viruses	Apis_mellifera_filamentous_virus	NA	Apis_filamentous-like	Apis_filamentous-like	Viruses	NA	NA	NA	NA	NA	NA	NA	NA	NA	NA	NA	NA
54	Apis_filamentous-like	Cluster3538	4	QANH01000143.1:148516-149056(-):Harpegnathos_saltator	Harpegnathos_saltator	QANH01000143.1_148516-149056_-__Harpegnathos_saltator	QANH01000143.1:Harpegnathos_saltator	15	NA	NA	NA	NA	NA	YP_009165916	NA	29026	QANH01000143.1:Harpegnathos_saltator	15	21	34.4	176	105	0	1	161	457	632	3.306e-23	101	700	1100043	unclassified_viruses	Apis_mellifera_filamentous_virus	NA	Apis_filamentous-like	Apis_filamentous-like	Viruses	NA	NA	NA	NA	NA	NA	NA	NA	NA	NA	NA	NA
54	Apis_filamentous-like	Cluster3538	4	QANH01000187.1:88002-88542(+):Harpegnathos_saltator	Harpegnathos_saltator	QANH01000187.1_88002-88542_+__Harpegnathos_saltator	QANH01000187.1:Harpegnathos_saltator	19	NA	NA	NA	NA	NA	YP_009165916	NA	30033	QANH01000187.1:Harpegnathos_saltator	19	29	35.7	176	103	0	1	161	457	632	5.652e-25	106	700	1100043	unclassified_viruses	Apis_mellifera_filamentous_virus	NA	Apis_filamentous-like	Apis_filamentous-like	Viruses	NA	NA	NA	NA	NA	NA	NA	NA	NA	NA	NA	NA
54	Apis_filamentous-like	Cluster3538	4	QANH01000191.1:238433-238916(-):Harpegnathos_saltator	Harpegnathos_saltator	QANH01000191.1_238433-238916_-__Harpegnathos_saltator	QANH01000191.1:Harpegnathos_saltator	135	NA	NA	NA	NA	NA	YP_009165916	NA	30034	QANH01000191.1:Harpegnathos_saltator	135	64	31.9	176	109	0	1	161	457	632	7.868e-20	90	700	1100043	unclassified_viruses	Apis_mellifera_filamentous_virus	NA	Apis_filamentous-like	Apis_filamentous-like	Viruses	NA	NA	NA	NA	NA	NA	NA	NA	NA	NA	NA	NA
54	Apis_filamentous-like	Cluster3538	4	QANH01000200.1:10691-11300(-):Harpegnathos_saltator	Harpegnathos_saltator	QANH01000200.1_10691-11300_-__Harpegnathos_saltator	QANH01000200.1:Harpegnathos_saltator	2	NA	NA	NA	NA	NA	YP_009165916	NA	30051	QANH01000200.1:Harpegnathos_saltator	2	27	29.5	215	142	0	1	203	437	651	1.619e-21	97	700	1100043	unclassified_viruses	Apis_mellifera_filamentous_virus	NA	Apis_filamentous-like	Apis_filamentous-like	Viruses	NA	NA	NA	NA	NA	NA	NA	NA	NA	NA	NA	NA
54	Apis_filamentous-like	Cluster3538	4	QANH01000200.1:35520-36072(-):Harpegnathos_saltator	Harpegnathos_saltator	QANH01000200.1_35520-36072_-__Harpegnathos_saltator	QANH01000200.1:Harpegnathos_saltator	2	NA	NA	NA	NA	NA	YP_009165916	NA	30050	QANH01000200.1:Harpegnathos_saltator	2	27	33.6	197	122	0	1	184	455	651	9.98e-26	108	700	1100043	unclassified_viruses	Apis_mellifera_filamentous_virus	NA	Apis_filamentous-like	Apis_filamentous-like	Viruses	NA	NA	NA	NA	NA	NA	NA	NA	NA	NA	NA	NA
54	Apis_filamentous-like	Cluster3538	4	QANH01000200.1:75501-76281(-):Harpegnathos_saltator	Harpegnathos_saltator	QANH01000200.1_75501-76281_-__Harpegnathos_saltator	QANH01000200.1:Harpegnathos_saltator	2	NA	NA	NA	NA	NA	YP_009165916	NA	30049	QANH01000200.1:Harpegnathos_saltator	2	27	23.2	260	165	0	1	260	366	581	2.33e-14	78	700	1100043	unclassified_viruses	Apis_mellifera_filamentous_virus	NA	Apis_filamentous-like	Apis_filamentous-like	Viruses	NA	NA	NA	NA	NA	NA	NA	NA	NA	NA	NA	NA
54	Apis_filamentous-like	Cluster3538	4	QANH01000219.1:97158-97641(-):Harpegnathos_saltator	Harpegnathos_saltator	QANH01000219.1_97158-97641_-__Harpegnathos_saltator	QANH01000219.1:Harpegnathos_saltator	58	NA	NA	NA	NA	NA	YP_009165916	NA	30218	QANH01000219.1:Harpegnathos_saltator	58	56	31.9	176	109	0	1	161	457	632	7.868e-20	90	700	1100043	unclassified_viruses	Apis_mellifera_filamentous_virus	NA	Apis_filamentous-like	Apis_filamentous-like	Viruses	NA	NA	NA	NA	NA	NA	NA	NA	NA	NA	NA	NA
54	Apis_filamentous-like	Cluster3538	4	QANH01000223.1:51889-52375(-):Harpegnathos_saltator	Harpegnathos_saltator	QANH01000223.1_51889-52375_-__Harpegnathos_saltator	QANH01000223.1:Harpegnathos_saltator	65	NA	NA	NA	NA	NA	YP_009165916	NA	30254	QANH01000223.1:Harpegnathos_saltator	65	54	32	175	109	0	1	162	477	651	8.156e-20	90	700	1100043	unclassified_viruses	Apis_mellifera_filamentous_virus	NA	Apis_filamentous-like	Apis_filamentous-like	Viruses	NA	NA	NA	NA	NA	NA	NA	NA	NA	NA	NA	NA
54	Apis_filamentous-like	Cluster3538	4	QANH01000265.1:13927-14605(-):Harpegnathos_saltator	Harpegnathos_saltator	QANH01000265.1_13927-14605_-__Harpegnathos_saltator	QANH01000265.1:Harpegnathos_saltator	6	NA	NA	NA	NA	NA	YP_009165916	NA	30535	QANH01000265.1:Harpegnathos_saltator	6	9	29.9	226	139	0	9	207	407	632	1.244e-23	104	700	1100043	unclassified_viruses	Apis_mellifera_filamentous_virus	NA	Apis_filamentous-like	Apis_filamentous-like	Viruses	NA	NA	NA	NA	NA	NA	NA	NA	NA	NA	NA	NA
54	Apis_filamentous-like	Cluster3538	4	QANH01000269.1:34839-35376(+):Harpegnathos_saltator	Harpegnathos_saltator	QANH01000269.1_34839-35376_+__Harpegnathos_saltator	QANH01000269.1:Harpegnathos_saltator	2	NA	NA	NA	NA	NA	YP_009165916	NA	30560	QANH01000269.1:Harpegnathos_saltator	2	7	32.1	176	108	0	1	160	457	632	7.885e-20	91	700	1100043	unclassified_viruses	Apis_mellifera_filamentous_virus	NA	Apis_filamentous-like	Apis_filamentous-like	Viruses	NA	NA	NA	NA	NA	NA	NA	NA	NA	NA	NA	NA
54	Apis_filamentous-like	Cluster3538	4	QANH01000280.1:41397-42075(+):Harpegnathos_saltator	Harpegnathos_saltator	QANH01000280.1_41397-42075_+__Harpegnathos_saltator	QANH01000280.1:Harpegnathos_saltator	74	NA	NA	NA	NA	NA	YP_009165916	NA	30783	QANH01000280.1:Harpegnathos_saltator	74	42	29.1	226	140	0	9	207	407	632	3.744e-22	100	700	1100043	unclassified_viruses	Apis_mellifera_filamentous_virus	NA	Apis_filamentous-like	Apis_filamentous-like	Viruses	NA	NA	NA	NA	NA	NA	NA	NA	NA	NA	NA	NA
54	Apis_filamentous-like	Cluster3538	4	QANH01000378.1:38768-39248(+):Harpegnathos_saltator	Harpegnathos_saltator	QANH01000378.1_38768-39248_+__Harpegnathos_saltator	QANH01000378.1:Harpegnathos_saltator	2	NA	NA	NA	NA	NA	YP_009165916	NA	31681	QANH01000378.1:Harpegnathos_saltator	2	8	33.5	176	106	0	1	160	457	632	3.669e-22	97	700	1100043	unclassified_viruses	Apis_mellifera_filamentous_virus	NA	Apis_filamentous-like	Apis_filamentous-like	Viruses	NA	NA	NA	NA	NA	NA	NA	NA	NA	NA	NA	NA
54	Apis_filamentous-like	Cluster3538	4	QANH01000406.1:52240-52918(+):Harpegnathos_saltator	Harpegnathos_saltator	QANH01000406.1_52240-52918_+__Harpegnathos_saltator	QANH01000406.1:Harpegnathos_saltator	60	NA	NA	NA	NA	NA	YP_009165916	NA	31694	QANH01000406.1:Harpegnathos_saltator	60	27	29.9	226	139	0	9	207	407	632	1.244e-23	104	700	1100043	unclassified_viruses	Apis_mellifera_filamentous_virus	NA	Apis_filamentous-like	Apis_filamentous-like	Viruses	NA	NA	NA	NA	NA	NA	NA	NA	NA	NA	NA	NA
54	Apis_filamentous-like	Cluster3538	4	QANH01000728.1:125451-125964(+):Harpegnathos_saltator	Harpegnathos_saltator	QANH01000728.1_125451-125964_+__Harpegnathos_saltator	QANH01000728.1:Harpegnathos_saltator	68	NA	NA	NA	NA	NA	YP_009165916	NA	33862	QANH01000728.1:Harpegnathos_saltator	68	49	33.9	184	112	0	1	171	455	638	4.99e-24	103	700	1100043	unclassified_viruses	Apis_mellifera_filamentous_virus	NA	Apis_filamentous-like	Apis_filamentous-like	Viruses	NA	NA	NA	NA	NA	NA	NA	NA	NA	NA	NA	NA
54	Apis_filamentous-like	Cluster3538	4	QANH01000747.1:177668-178220(+):Harpegnathos_saltator	Harpegnathos_saltator	QANH01000747.1_177668-178220_+__Harpegnathos_saltator	QANH01000747.1:Harpegnathos_saltator	50	NA	NA	NA	NA	NA	YP_009165916	NA	34215	QANH01000747.1:Harpegnathos_saltator	50	52	32.8	197	123	0	1	184	455	651	1.668e-24	105	700	1100043	unclassified_viruses	Apis_mellifera_filamentous_virus	NA	Apis_filamentous-like	Apis_filamentous-like	Viruses	NA	NA	NA	NA	NA	NA	NA	NA	NA	NA	NA	NA
54	Apis_filamentous-like	Cluster3614	12	QANH01000728.1:222742-223609(-):Harpegnathos_saltator	Harpegnathos_saltator	QANH01000728.1_222742-223609_-__Harpegnathos_saltator	QANH01000728.1:Harpegnathos_saltator	68	NA	NA	NA	NA	NA	YP_009165811	NA	33744	QANH01000728.1:Harpegnathos_saltator	68	49	30.5	264	177	0	7	270	188	442	8.326e-30	124	829	1100043	unclassified_viruses	Apis_mellifera_filamentous_virus	NA	Apis_filamentous-like	Apis_filamentous-like	Viruses	NA	NA	NA	NA	NA	NA	NA	NA	NA	NA	NA	NA
54	Apis_filamentous-like	Cluster3614	22	QANH01000038.1:41979-42921(-):Harpegnathos_saltator	Harpegnathos_saltator	QANH01000038.1_41979-42921_-__Harpegnathos_saltator	QANH01000038.1:Harpegnathos_saltator	79	NA	NA	NA	NA	NA	YP_009165811	NA	26098	QANH01000038.1:Harpegnathos_saltator	79	102	31.1	222	150	0	40	261	294	512	3.154e-24	109	829	1100043	unclassified_viruses	Apis_mellifera_filamentous_virus	NA	Apis_filamentous-like	Apis_filamentous-like	Viruses	NA	NA	NA	NA	NA	NA	NA	NA	NA	NA	NA	NA
54	Apis_filamentous-like	Cluster3614	23	QANH01000092.1:101290-102025(-):Harpegnathos_saltator	Harpegnathos_saltator	QANH01000092.1_101290-102025_-__Harpegnathos_saltator	QANH01000092.1:Harpegnathos_saltator	494	NA	NA	NA	NA	NA	YP_009165811	NA	27524	QANH01000092.1:Harpegnathos_saltator	494	182	33.9	224	142	0	4	227	183	398	3.04e-30	124	829	1100043	unclassified_viruses	Apis_mellifera_filamentous_virus	NA	Apis_filamentous-like	Apis_filamentous-like	Viruses	NA	NA	NA	NA	NA	NA	NA	NA	NA	NA	NA	NA
54	Apis_filamentous-like	Cluster3614	24	QANH01000164.1:608562-609396(-):Harpegnathos_saltator	Harpegnathos_saltator	QANH01000164.1_608562-609396_-__Harpegnathos_saltator	QANH01000164.1:Harpegnathos_saltator	285	NA	NA	NA	NA	NA	YP_009165811	NA	29284	QANH01000164.1:Harpegnathos_saltator	285	146	33.4	224	143	0	1	224	183	398	5.271e-29	122	829	1100043	unclassified_viruses	Apis_mellifera_filamentous_virus	NA	Apis_filamentous-like	Apis_filamentous-like	Viruses	NA	NA	NA	NA	NA	NA	NA	NA	NA	NA	NA	NA
54	Apis_filamentous-like	Cluster3614	25	QANH01000328.1:36430-37114(+):Harpegnathos_saltator	Harpegnathos_saltator	QANH01000328.1_36430-37114_+__Harpegnathos_saltator	QANH01000328.1:Harpegnathos_saltator	85	NA	NA	NA	NA	NA	YP_009165811	NA	31042	QANH01000328.1:Harpegnathos_saltator	85	38	32.6	223	145	0	1	223	183	398	4.715e-28	117	829	1100043	unclassified_viruses	Apis_mellifera_filamentous_virus	NA	Apis_filamentous-like	Apis_filamentous-like	Viruses	NA	NA	NA	NA	NA	NA	NA	NA	NA	NA	NA	NA
54	Apis_filamentous-like	Cluster3614	26	QANH01000718.1:451440-452187(-):Harpegnathos_saltator	Harpegnathos_saltator	QANH01000718.1_451440-452187_-__Harpegnathos_saltator	QANH01000718.1:Harpegnathos_saltator	152	NA	NA	NA	NA	NA	YP_009165811	NA	33531	QANH01000718.1:Harpegnathos_saltator	152	71	34.2	216	136	0	16	231	192	398	2.22e-29	122	829	1100043	unclassified_viruses	Apis_mellifera_filamentous_virus	NA	Apis_filamentous-like	Apis_filamentous-like	Viruses	NA	NA	NA	NA	NA	NA	NA	NA	NA	NA	NA	NA
54	Apis_filamentous-like	Cluster3614	26	QANH01000754.1:98269-99190(-):Harpegnathos_saltator	Harpegnathos_saltator	QANH01000754.1_98269-99190_-__Harpegnathos_saltator	QANH01000754.1:Harpegnathos_saltator	85	NA	NA	NA	NA	NA	YP_009165811	NA	34222	QANH01000754.1:Harpegnathos_saltator	85	20	26.3	283	197	0	4	286	238	505	5.585e-23	105	829	1100043	unclassified_viruses	Apis_mellifera_filamentous_virus	NA	Apis_filamentous-like	Apis_filamentous-like	Viruses	NA	NA	NA	NA	NA	NA	NA	NA	NA	NA	NA	NA
54	Apis_filamentous-like	Cluster3614	28	QANH01000124.1:49017-50127(-):Harpegnathos_saltator	Harpegnathos_saltator	QANH01000124.1_49017-50127_-__Harpegnathos_saltator	QANH01000124.1:Harpegnathos_saltator	37	NA	NA	NA	NA	NA	YP_009165811	NA	28454	QANH01000124.1:Harpegnathos_saltator	37	29	27.8	330	229	0	1	330	188	505	7.664e-32	133	829	1100043	unclassified_viruses	Apis_mellifera_filamentous_virus	NA	Apis_filamentous-like	Apis_filamentous-like	Viruses	NA	NA	NA	NA	NA	NA	NA	NA	NA	NA	NA	NA
54	Apis_filamentous-like	Cluster3614	28	QANH01000124.1:79502-80696(-):Harpegnathos_saltator	Harpegnathos_saltator	QANH01000124.1_79502-80696_-__Harpegnathos_saltator	QANH01000124.1:Harpegnathos_saltator	37	NA	NA	NA	NA	NA	YP_009165811	NA	28392	QANH01000124.1:Harpegnathos_saltator	37	29	28.2	307	209	0	4	310	214	505	9.29e-30	128	829	1100043	unclassified_viruses	Apis_mellifera_filamentous_virus	NA	Apis_filamentous-like	Apis_filamentous-like	Viruses	NA	NA	NA	NA	NA	NA	NA	NA	NA	NA	NA	NA
54	Apis_filamentous-like	Cluster3614	29	QANH01000051.1:157259-158279(+):Harpegnathos_saltator	Harpegnathos_saltator	QANH01000051.1_157259-158279_+__Harpegnathos_saltator	QANH01000051.1:Harpegnathos_saltator	538	NA	NA	NA	NA	NA	YP_009165811	NA	26626	QANH01000051.1:Harpegnathos_saltator	538	194	29	328	225	0	7	334	188	505	4.523e-35	142	829	1100043	unclassified_viruses	Apis_mellifera_filamentous_virus	NA	Apis_filamentous-like	Apis_filamentous-like	Viruses	NA	NA	NA	NA	NA	NA	NA	NA	NA	NA	NA	NA
54	Apis_filamentous-like	Cluster3614	29	QANH01000728.1:165243-166044(-):Harpegnathos_saltator	Harpegnathos_saltator	QANH01000728.1_165243-166044_-__Harpegnathos_saltator	QANH01000728.1:Harpegnathos_saltator	68	NA	NA	NA	NA	NA	YP_009165811	NA	33776	QANH01000728.1:Harpegnathos_saltator	68	49	31.4	246	165	0	1	246	188	428	5.221e-29	121	829	1100043	unclassified_viruses	Apis_mellifera_filamentous_virus	NA	Apis_filamentous-like	Apis_filamentous-like	Viruses	NA	NA	NA	NA	NA	NA	NA	NA	NA	NA	NA	NA
54	Apis_filamentous-like	Cluster3614	30	QANH01000041.1:105259-106009(-):Harpegnathos_saltator	Harpegnathos_saltator	QANH01000041.1_105259-106009_-__Harpegnathos_saltator	QANH01000041.1:Harpegnathos_saltator	25	NA	NA	NA	NA	NA	YP_009165811	NA	26217	QANH01000041.1:Harpegnathos_saltator	25	22	30.1	246	162	0	1	246	296	528	1.119e-26	114	829	1100043	unclassified_viruses	Apis_mellifera_filamentous_virus	NA	Apis_filamentous-like	Apis_filamentous-like	Viruses	NA	NA	NA	NA	NA	NA	NA	NA	NA	NA	NA	NA
54	Apis_filamentous-like	Cluster3614	30	QANH01000071.1:28505-29255(+):Harpegnathos_saltator	Harpegnathos_saltator	QANH01000071.1_28505-29255_+__Harpegnathos_saltator	QANH01000071.1:Harpegnathos_saltator	6	NA	NA	NA	NA	NA	YP_009165811	NA	26940	QANH01000071.1:Harpegnathos_saltator	6	9	30	246	162	0	1	246	296	528	1.524e-26	113	829	1100043	unclassified_viruses	Apis_mellifera_filamentous_virus	NA	Apis_filamentous-like	Apis_filamentous-like	Viruses	NA	NA	NA	NA	NA	NA	NA	NA	NA	NA	NA	NA
54	Apis_filamentous-like	Cluster3614	30	QANH01000071.1:46328-47336(+):Harpegnathos_saltator	Harpegnathos_saltator	QANH01000071.1_46328-47336_+__Harpegnathos_saltator	QANH01000071.1:Harpegnathos_saltator	6	NA	NA	NA	NA	NA	YP_009165811	NA	26999	QANH01000071.1:Harpegnathos_saltator	6	9	28.3	325	217	0	8	332	226	528	5.455e-33	136	829	1100043	unclassified_viruses	Apis_mellifera_filamentous_virus	NA	Apis_filamentous-like	Apis_filamentous-like	Viruses	NA	NA	NA	NA	NA	NA	NA	NA	NA	NA	NA	NA
54	Apis_filamentous-like	Cluster3614	30	QANH01000073.1:593227-594352(-):Harpegnathos_saltator	Harpegnathos_saltator	QANH01000073.1_593227-594352_-__Harpegnathos_saltator	QANH01000073.1:Harpegnathos_saltator	325	NA	NA	NA	NA	NA	YP_009165811	NA	27172	QANH01000073.1:Harpegnathos_saltator	325	100	28.5	342	229	0	1	342	179	499	2.372e-35	144	829	1100043	unclassified_viruses	Apis_mellifera_filamentous_virus	NA	Apis_filamentous-like	Apis_filamentous-like	Viruses	NA	NA	NA	NA	NA	NA	NA	NA	NA	NA	NA	NA
54	Apis_filamentous-like	Cluster3614	30	QANH01000187.1:24900-25584(+):Harpegnathos_saltator	Harpegnathos_saltator	QANH01000187.1_24900-25584_+__Harpegnathos_saltator	QANH01000187.1:Harpegnathos_saltator	19	NA	NA	NA	NA	NA	YP_009165811	NA	29861	QANH01000187.1:Harpegnathos_saltator	19	29	30	228	150	0	1	228	316	530	3.829e-24	106	829	1100043	unclassified_viruses	Apis_mellifera_filamentous_virus	NA	Apis_filamentous-like	Apis_filamentous-like	Viruses	NA	NA	NA	NA	NA	NA	NA	NA	NA	NA	NA	NA
54	Apis_filamentous-like	Cluster3614	30	QANH01000187.1:35520-36552(+):Harpegnathos_saltator	Harpegnathos_saltator	QANH01000187.1_35520-36552_+__Harpegnathos_saltator	QANH01000187.1:Harpegnathos_saltator	19	NA	NA	NA	NA	NA	YP_009165811	NA	29915	QANH01000187.1:Harpegnathos_saltator	19	29	30.4	224	146	0	1	224	318	528	4.792e-23	106	829	1100043	unclassified_viruses	Apis_mellifera_filamentous_virus	NA	Apis_filamentous-like	Apis_filamentous-like	Viruses	NA	NA	NA	NA	NA	NA	NA	NA	NA	NA	NA	NA
54	Apis_filamentous-like	Cluster3614	30	QANH01000368.1:196850-198002(+):Harpegnathos_saltator	Harpegnathos_saltator	QANH01000368.1_196850-198002_+__Harpegnathos_saltator	QANH01000368.1:Harpegnathos_saltator	50	NA	NA	NA	NA	NA	YP_009165811	NA	31319	QANH01000368.1:Harpegnathos_saltator	50	41	27.1	365	254	0	1	365	179	528	2.452e-34	141	829	1100043	unclassified_viruses	Apis_mellifera_filamentous_virus	NA	Apis_filamentous-like	Apis_filamentous-like	Viruses	NA	NA	NA	NA	NA	NA	NA	NA	NA	NA	NA	NA
54	Apis_filamentous-like	Cluster3614	30	QANH01000535.1:38279-39125(+):Harpegnathos_saltator	Harpegnathos_saltator	QANH01000535.1_38279-39125_+__Harpegnathos_saltator	QANH01000535.1:Harpegnathos_saltator	33	NA	NA	NA	NA	NA	YP_009165811	NA	32600	QANH01000535.1:Harpegnathos_saltator	33	22	28.3	248	168	0	31	278	294	528	5.755e-23	104	829	1100043	unclassified_viruses	Apis_mellifera_filamentous_virus	NA	Apis_filamentous-like	Apis_filamentous-like	Viruses	NA	NA	NA	NA	NA	NA	NA	NA	NA	NA	NA	NA
54	Apis_filamentous-like	Cluster3614	30	QANH01000842.1:2463-3690(-):Harpegnathos_saltator	Harpegnathos_saltator	QANH01000842.1_2463-3690_-__Harpegnathos_saltator	QANH01000842.1:Harpegnathos_saltator	8	NA	NA	NA	NA	NA	YP_009165811	NA	34991	QANH01000842.1:Harpegnathos_saltator	8	11	27.1	362	252	0	29	390	183	528	1.044e-33	140	829	1100043	unclassified_viruses	Apis_mellifera_filamentous_virus	NA	Apis_filamentous-like	Apis_filamentous-like	Viruses	NA	NA	NA	NA	NA	NA	NA	NA	NA	NA	NA	NA
54	Apis_filamentous-like	Cluster3614	4	QANH01000184.1:122992-123661(+):Harpegnathos_saltator	Harpegnathos_saltator	QANH01000184.1_122992-123661_+__Harpegnathos_saltator	QANH01000184.1:Harpegnathos_saltator	70	NA	NA	NA	NA	NA	YP_009165811	NA	29802	QANH01000184.1:Harpegnathos_saltator	70	59	31.6	223	147	0	1	223	183	398	2.282e-26	112	829	1100043	unclassified_viruses	Apis_mellifera_filamentous_virus	NA	Apis_filamentous-like	Apis_filamentous-like	Viruses	NA	NA	NA	NA	NA	NA	NA	NA	NA	NA	NA	NA
54	Apis_filamentous-like	Cluster3614	5	QANH01000275.1:54215-55055(-):Harpegnathos_saltator	Harpegnathos_saltator	QANH01000275.1_54215-55055_-__Harpegnathos_saltator	QANH01000275.1:Harpegnathos_saltator	55	NA	NA	NA	NA	NA	YP_009165811	NA	30604	QANH01000275.1:Harpegnathos_saltator	55	19	33.2	216	143	0	6	220	183	398	3.041e-27	117	829	1100043	unclassified_viruses	Apis_mellifera_filamentous_virus	NA	Apis_filamentous-like	Apis_filamentous-like	Viruses	NA	NA	NA	NA	NA	NA	NA	NA	NA	NA	NA	NA
54	Apis_filamentous-like	Cluster3614	7	QANH01000215.1:29878-30577(+):Harpegnathos_saltator	Harpegnathos_saltator	QANH01000215.1_29878-30577_+__Harpegnathos_saltator	QANH01000215.1:Harpegnathos_saltator	14	NA	NA	NA	NA	NA	YP_009165811	NA	30056	QANH01000215.1:Harpegnathos_saltator	14	13	31.2	220	149	0	8	227	296	512	5.101e-25	108	829	1100043	unclassified_viruses	Apis_mellifera_filamentous_virus	NA	Apis_filamentous-like	Apis_filamentous-like	Viruses	NA	NA	NA	NA	NA	NA	NA	NA	NA	NA	NA	NA
54	Apis_filamentous-like	Cluster3614	8	QANH01000029.1:152839-153856(-):Harpegnathos_saltator	Harpegnathos_saltator	QANH01000029.1_152839-153856_-__Harpegnathos_saltator	QANH01000029.1:Harpegnathos_saltator	133	NA	NA	NA	NA	NA	YP_009165811	NA	25695	QANH01000029.1:Harpegnathos_saltator	133	74	27.9	327	229	0	7	333	188	505	4.993e-32	133	829	1100043	unclassified_viruses	Apis_mellifera_filamentous_virus	NA	Apis_filamentous-like	Apis_filamentous-like	Viruses	NA	NA	NA	NA	NA	NA	NA	NA	NA	NA	NA	NA
187	Apis_filamentous-like	Cluster17704	5	JWHX01002133.1:6736-7264(-):Pseudomyrmex_gracilis	Pseudomyrmex_gracilis	JWHX01002133.1_6736-7264_-__Pseudomyrmex_gracilis	JWHX01002133.1:Pseudomyrmex_gracilis	1	NA	NA	4	313.972	313.972	YP_009165839	NA	52565	JWHX01002133.1:Pseudomyrmex_gracilis	1	1	39.4	147	84	0	31	170	121	267	1.12e-23	102	279	1100043	unclassified_viruses	Apis_mellifera_filamentous_virus	NA	Apis_filamentous-like	Apis_filamentous-like	Viruses	NA	NA	NA	NA	NA	NA	NA	NA	NA	NA	NA	NA
187	Apis_filamentous-like	Cluster18348	1	JWHX01000539.1_1:60256-60946(-):Pseudomyrmex_gracilis	Pseudomyrmex_gracilis	JWHX01000539.1_1_60256-60946_-__Pseudomyrmex_gracilis	JWHX01000539.1_1:Pseudomyrmex_gracilis	11	NA	NA	0	0	0	YP_009165774	NA	6319	JWHX01000539.1_1:Pseudomyrmex_gracilis	11	4	30	204	141	0	29	230	321	524	2.324e-20	94	641	1100043	unclassified_viruses	Apis_mellifera_filamentous_virus	NA	Apis_filamentous-like	Apis_filamentous-like	Viruses	NA	NA	NA	NA	NA	NA	NA	NA	NA	NA	NA	NA
187	Apis_filamentous-like	Cluster18348	1	JWHX01000563.1:19760-20510(-):Pseudomyrmex_gracilis	Pseudomyrmex_gracilis	JWHX01000563.1_19760-20510_-__Pseudomyrmex_gracilis	JWHX01000563.1:Pseudomyrmex_gracilis	10	NA	NA	0	0	0	YP_009165774	NA	6359	JWHX01000563.1:Pseudomyrmex_gracilis	10	4	24.5	266	188	0	1	250	259	524	7.145e-18	88	641	1100043	unclassified_viruses	Apis_mellifera_filamentous_virus	NA	Apis_filamentous-like	Apis_filamentous-like	Viruses	NA	NA	NA	NA	NA	NA	NA	NA	NA	NA	NA	NA
187	Apis_filamentous-like	Cluster19349	2	JWHX01001627.1:13579-14926(+):Pseudomyrmex_gracilis	Pseudomyrmex_gracilis	JWHX01001627.1_13579-14926_+__Pseudomyrmex_gracilis	JWHX01001627.1:Pseudomyrmex_gracilis	1	NA	NA	6	184.819	184.819	YP_009165796	NA	52563	JWHX01001627.1:Pseudomyrmex_gracilis	1	3	16.4	577	375	0	1	449	156	732	3.19e-12	74	783	1100043	unclassified_viruses	Apis_mellifera_filamentous_virus	NA	Apis_filamentous-like	Apis_filamentous-like	Viruses	NA	NA	NA	NA	NA	NA	NA	NA	NA	NA	NA	NA
187	Apis_filamentous-like	Cluster22358	4	JWHX01001627.1:10131-10596(+):Pseudomyrmex_gracilis	Pseudomyrmex_gracilis	JWHX01001627.1_10131-10596_+__Pseudomyrmex_gracilis	JWHX01001627.1:Pseudomyrmex_gracilis	1	NA	NA	0	0	0	YP_009165793	NA	52528	JWHX01001627.1:Pseudomyrmex_gracilis	1	3	33.3	164	103	0	1	155	317	480	8.653e-20	90	550	1100043	unclassified_viruses	Apis_mellifera_filamentous_virus	NA	Apis_filamentous-like	Apis_filamentous-like	Viruses	NA	NA	NA	NA	NA	NA	NA	NA	NA	NA	NA	NA
187	Apis_filamentous-like	Cluster22359	3	JWHX01001094.1:33180-34005(+):Pseudomyrmex_gracilis	Pseudomyrmex_gracilis	JWHX01001094.1_33180-34005_+__Pseudomyrmex_gracilis	JWHX01001094.1:Pseudomyrmex_gracilis	1	NA	NA	2	100.539	100.539	YP_009165808	NA	52483	JWHX01001094.1:Pseudomyrmex_gracilis	1	4	24.4	210	155	0	1	210	98	303	1.582e-11	69	331	1100043	unclassified_viruses	Apis_mellifera_filamentous_virus	NA	Apis_filamentous-like	Apis_filamentous-like	Viruses	NA	NA	NA	NA	NA	NA	NA	NA	NA	NA	NA	NA
187	Apis_filamentous-like	Cluster22359	3	JWHX01003303.1:3783-4527(-):Pseudomyrmex_gracilis	Pseudomyrmex_gracilis	JWHX01003303.1_3783-4527_-__Pseudomyrmex_gracilis	JWHX01003303.1:Pseudomyrmex_gracilis	1	NA	NA	6510	362836	362836	YP_009165808	NA	52592	JWHX01003303.1:Pseudomyrmex_gracilis	1	2	23.3	209	157	0	1	209	98	303	6.602e-10	64	331	1100043	unclassified_viruses	Apis_mellifera_filamentous_virus	NA	Apis_filamentous-like	Apis_filamentous-like	Viruses	NA	NA	NA	NA	NA	NA	NA	NA	NA	NA	NA	NA
187	Apis_filamentous-like	Cluster26675	5	JWHX01001094.1:8681-9209(+):Pseudomyrmex_gracilis	Pseudomyrmex_gracilis	JWHX01001094.1_8681-9209_+__Pseudomyrmex_gracilis	JWHX01001094.1:Pseudomyrmex_gracilis	1	NA	NA	12	941.915	941.915	YP_009165894	NA	52489	JWHX01001094.1:Pseudomyrmex_gracilis	1	4	23	161	120	0	20	176	167	327	1.589e-05	49	357	1100043	unclassified_viruses	Apis_mellifera_filamentous_virus	NA	Apis_filamentous-like	Apis_filamentous-like	Viruses	NA	NA	NA	NA	NA	NA	NA	NA	NA	NA	NA	NA
187	Apis_filamentous-like	Cluster3481	2	JWHX01001200.1:29566-30364(+):Pseudomyrmex_gracilis	Pseudomyrmex_gracilis	JWHX01001200.1_29566-30364_+__Pseudomyrmex_gracilis	JWHX01001200.1:Pseudomyrmex_gracilis	NA	NA	NA	1	51.9684	51.9684	YP_009165874	NA	6479	JWHX01001200.1:Pseudomyrmex_gracilis	NA	5	28.7	267	189	0	1	266	379	645	1.306e-26	114	947	1100043	unclassified_viruses	Apis_mellifera_filamentous_virus	NA	Apis_filamentous-like	Apis_filamentous-like	Viruses	NA	NA	NA	NA	NA	NA	NA	NA	NA	NA	NA	NA
187	Apis_filamentous-like	Cluster3538	3	JWHX01001627.1:7240-8413(-):Pseudomyrmex_gracilis	Pseudomyrmex_gracilis	JWHX01001627.1_7240-8413_-__Pseudomyrmex_gracilis	JWHX01001627.1:Pseudomyrmex_gracilis	1	NA	NA	3	106.106	106.106	YP_009165916	NA	52564	JWHX01001627.1:Pseudomyrmex_gracilis	1	3	21	473	308	0	1	391	177	649	6.85e-25	113	700	1100043	unclassified_viruses	Apis_mellifera_filamentous_virus	NA	Apis_filamentous-like	Apis_filamentous-like	Viruses	NA	NA	NA	NA	NA	NA	NA	NA	NA	NA	NA	NA
187	Apis_filamentous-like	Cluster3614	31	JWHX01001627.1:5283-6576(+):Pseudomyrmex_gracilis	Pseudomyrmex_gracilis	JWHX01001627.1_5283-6576_+__Pseudomyrmex_gracilis	JWHX01001627.1:Pseudomyrmex_gracilis	1	NA	NA	7	224.621	224.621	YP_009165811	NA	52530	JWHX01001627.1:Pseudomyrmex_gracilis	1	3	30.9	319	217	0	11	325	181	499	7.919e-38	153	829	1100043	unclassified_viruses	Apis_mellifera_filamentous_virus	NA	Apis_filamentous-like	Apis_filamentous-like	Viruses	NA	NA	NA	NA	NA	NA	NA	NA	NA	NA	NA	NA
187	Apis_filamentous-like	Cluster3614	31	JWHX01002872.1:3628-4231(-):Pseudomyrmex_gracilis	Pseudomyrmex_gracilis	JWHX01002872.1_3628-4231_-__Pseudomyrmex_gracilis	JWHX01002872.1:Pseudomyrmex_gracilis	NA	NA	NA	0	0	0	YP_009165811	NA	112893	JWHX01002872.1:Pseudomyrmex_gracilis	NA	0	31.9	208	133	0	1	196	186	393	1.178e-24	106	829	1100043	unclassified_viruses	Apis_mellifera_filamentous_virus	NA	Apis_filamentous-like	Apis_filamentous-like	Viruses	NA	NA	NA	NA	NA	NA	NA	NA	NA	NA	NA	NA
67	Apis_filamentous-like	Cluster17704	6	LBMM01008626.1:2419-2725(+):Lasius_niger	Lasius_niger	LBMM01008626.1_2419-2725_+__Lasius_niger	LBMM01008626.1:Lasius_niger	3	NA	NA	7	1284.39	1284.39	YP_009165839	NA	100365	LBMM01008626.1:Lasius_niger	3	0	45.3	99	52	0	6	101	180	278	1.163e-18	84	279	1100043	unclassified_viruses	Apis_mellifera_filamentous_virus	NA	Apis_filamentous-like	Apis_filamentous-like	Viruses	NA	NA	NA	NA	NA	NA	NA	NA	NA	NA	NA	NA
67	Apis_filamentous-like	Cluster20217	3	LBMM01013074.1:2144-3026(-):Lasius_niger	Lasius_niger	LBMM01013074.1_2144-3026_-__Lasius_niger	LBMM01013074.1:Lasius_niger	NA	NA	NA	19	1212.08	1212.08	YP_009165828	NA	67603	LBMM01013074.1:Lasius_niger	NA	1	23.3	332	222	0	3	292	69	400	5.335e-21	98	1196	1100043	unclassified_viruses	Apis_mellifera_filamentous_virus	NA	Apis_filamentous-like	Apis_filamentous-like	Viruses	NA	NA	NA	NA	NA	NA	NA	NA	NA	NA	NA	NA
67	Apis_filamentous-like	Cluster22358	3	LBMM01014208.1:1378-1924(+):Lasius_niger	Lasius_niger	LBMM01014208.1_1378-1924_+__Lasius_niger	LBMM01014208.1:Lasius_niger	NA	NA	NA	25	2574.48	2574.48	YP_009165793	NA	93407	LBMM01014208.1:Lasius_niger	NA	0	27.5	182	118	0	1	182	314	477	5.552e-14	74	550	1100043	unclassified_viruses	Apis_mellifera_filamentous_virus	NA	Apis_filamentous-like	Apis_filamentous-like	Viruses	NA	NA	NA	NA	NA	NA	NA	NA	NA	NA	NA	NA
326	Apis_filamentous-like	Cluster17704	7	KQ466956.1:4798-5089(-):Dinoponera_quadriceps	Dinoponera_quadriceps	KQ466956.1_4798-5089_-__Dinoponera_quadriceps	KQ466956.1:Dinoponera_quadriceps	4	NA	NA	NA	NA	NA	YP_009165839	NA	9868	KQ466956.1:Dinoponera_quadriceps	4	1	36.6	100	61	0	1	97	174	273	7.069e-12	64	279	1100043	unclassified_viruses	Apis_mellifera_filamentous_virus	NA	Apis_filamentous-like	Apis_filamentous-like	Viruses	NA	NA	NA	NA	NA	NA	NA	NA	NA	NA	NA	NA
[truncated: 423 more rows]
[truncated: 108 more columns]

## Sheet: Exogenous viral elements (E-X)
Clustername	Species_name	query_bis	Scaffold_species	count	Nb_Transcripto_Reads	TPM	Nb_Transcripto_Reads_whole_body	TPM_whole_body	TPM_all	target	family_y	Unnamed..0_x	Scaff_name	count_repeat	count_eucaryote	pident	alnlen	mismatch	gapopen	qstart	qend	tstart	tend	evalue	bits	tlen	Taxid	no_rank	species	genus	family	consensus_family	superkingdom	subfamily	superfamily	infraorder	suborder	order	cohort	infraclass	subclass	class	subphylum	phylum	kingdom	subgenus	tribe	genomic_structure	consensus_genomic_structure
[truncated: 789 more rows]
[truncated: 102 more columns]
