# Supplementary material for: Endoparasitoid lifestyle promotes endogenization and domestication of dsDNA viruses
Source: eLife. 2023 Jun 6;12:e85993. doi: 10.7554/eLife.85993 (PMC10259472; doi:10.7554/eLife.85993)
Supplement: Supplementary file 6. [file elife-85993-supp6.xlsx]

## Sheet: GLM_lifestyle_EVEs_dEVEs
Statistical tables summarizing the parameters of the negative binomial Bayesian GLM model with zero inflation, Each sub-table corresponds to the test performed on parts of the dataset (with viral genomic structures and/or with a stingency applied to the dataset). The column Type corresponds to the type of integrated candidate (EVE Event = Nb of integration events , and dEVE Events= Nb of EVE Even…
	dsDNA-ssDNA-dsRNA-ssRNA-Unknown RNA (A | B | C | D)										dsDNA-ssDNA-dsRNA-ssRNA-Unknown RNA (A)										dsDNA-ssDNA-dsRNA-ssRNA-Unknown RNA (A | B | C | D | E | F)										dsDNA-ssDNA-dsRNA-ssRNA-Unknown RNA (A | B | C | D) - with eusociality											dsDNA-ssDNA-dsRNA-ssRNA-Unknown RNA (A) - with eusociality
Lifestyles	Type	Median	CI_low	CI_high	ROPE_Percentage (%)	pd (%)	pvalue	% Endo > Ecto		Lifestyles	Type	Median	CI_low	CI_high	ROPE_Percentage (%)	pd (%)	pvalue	% Endo > Ecto		Lifestyles	Type	Median	CI_low	CI_high	ROPE_Percentage (%)	pd (%)	pvalue	% Endo > Ecto		Lifestyles	Type	Median	CI_low	CI_high	ROPE_Percentage (%)	pd (%)	pvalue	% Endo > Ecto	% Endo > Eusocio		Lifestyles	Type	Median	CI_low	CI_high	ROPE_Percentage (%)	pd (%)	pvalue	% Endo > Ecto
Endoparasitoid	EVEs_Events	1.374	0.904	1.854	7.276	92.7235	0.14553	99.01		Endoparasitoid	EVEs_Events	1.358	0.825	2.056	13.293	86.707	0.26586	97.12		Endoparasitoid	EVEs_Events	1.491	0.989	2.016	3.503	96.497	0.07006	98.84		Endoparasitoid	EVEs_Events	1.751	0.96	2.579	2.749	97.251	0.05498	99.57	98.42		Endoparasitoid	EVEs_Events	1.465	0.702	2.386	14.159	85.8405	0.28319	99.25
Ectoparasitoid	EVEs_Events	0.686	0.406	0.98	92.258	92.2575	0.15485	99.01		Ectoparasitoid	EVEs_Events	0.644	0.329	1.052	88.9	88.9	0.222	97.12		Ectoparasitoid	EVEs_Events	0.738	0.435	1.047	87.346	87.3455	0.25309	98.84		Ectoparasitoid	EVEs_Events	0.825	0.441	1.315	71.251	71.251	0.57498	99.57	98.42		Ectoparasitoid	EVEs_Events	0.603	0.243	1.079	87.691	87.691	0.24618	99.25
Endoparasitoid	dEVEs_Events	1.587	0.898	2.426	5.756	94.2445	0.11511	99.85		Endoparasitoid	dEVEs_Events	1.428	0.719	2.267	16.189	83.8115	0.32377	99.54		Endoparasitoid	dEVEs_Events	1.542	0.844	2.331	7.473	92.527	0.14946	99.85		Eusocial	EVEs_Events	1.08	0.633	1.61	39.377	60.6225	0.78755	99.57	98.42		Eusocial	EVEs_Events	0.668	0.307	1.089	87.154	87.1545	0.25691	99.25
Ectoparasitoid	dEVEs_Events	0.381	0.144	0.712	97.713	97.7125	0.04575	99.85		Ectoparasitoid	dEVEs_Events	0.302	0.078	0.647	98.122	98.1215	0.03757	99.54		Ectoparasitoid	dEVEs_Events	0.388	0.115	0.7	98.018	98.0185	0.03963	99.85		Endoparasitoid	dEVEs_Events	1.953	0.878	3.28	5.081	94.9195	0.10161	99.72	97.73		Endoparasitoid	dEVEs_Events	1.602	0.685	2.895	14.264	85.7365	0.28527	99.97
Endoparasitoid	EVEs_Numbers	2.385	1.413	3.543	0.182	99.8175	0.00365	99.93		Endoparasitoid	EVEs_Numbers	2.264	1.136	3.564	0.907	99.093	0.01814	99.3		Endoparasitoid	EVEs_Numbers	1.706	0.947	2.602	4.122	95.8775	0.08245	98.74		Ectoparasitoid	dEVEs_Events	0.429	0.12	0.875	93.884	93.8835	0.12233	99.72	97.73		Ectoparasitoid	dEVEs_Events	0.26	0.033	0.6	97.691	97.691	0.04618	99.97
Ectoparasitoid	EVEs_Numbers	0.66	0.35	1.05	89.131	89.131	0.21738	99.93		Ectoparasitoid	EVEs_Numbers	0.653	0.285	1.154	84.364	84.3645	0.31271	99.3		Ectoparasitoid	EVEs_Numbers	0.647	0.34	1.053	89.075	89.0755	0.21849	98.74		Eusocial	dEVEs_Events	1.035	0.441	1.757	46.786	53.2135	0.93573	99.72	97.73		Eusocial	dEVEs_Events	0.817	0.287	1.496	66.641	66.641	0.66718	99.97
Endoparasitoid	dEVEs_Numbers	2.991	1.362	5.024	0.18	99.8195	0.00361	100		Endoparasitoid	dEVEs_Numbers	3.066	1.177	5.51	0.924	99.076	0.01848	99.85		Endoparasitoid	dEVEs_Numbers	2.951	1.355	4.878	0.308	99.6925	0.00615	99.98		Endoparasitoid	EVEs_Numbers	3.605	1.698	5.822	0.078	99.922	0.00156	100	99.97		Endoparasitoid	EVEs_Numbers	2.96	1.062	5.369	1.228	98.7725	0.02455	99.86
Ectoparasitoid	dEVEs_Numbers	0.322	0.069	0.65	97.612	97.6125	0.04775	100		Ectoparasitoid	dEVEs_Numbers	0.276	0.04	0.648	96.992	96.992	0.06016	99.85		Ectoparasitoid	dEVEs_Numbers	0.315	0.078	0.646	97.868	97.868	0.04264	99.98		Ectoparasitoid	EVEs_Numbers	0.919	0.396	1.644	56.95	56.9495	0.86101	100	99.97		Ectoparasitoid	EVEs_Numbers	0.726	0.175	1.402	72.563	72.563	0.54874	99.86
																														Eusocial	EVEs_Numbers	1.345	0.63	2.13	21.125	78.8745	0.42251	100	99.97		Eusocial	EVEs_Numbers	0.875	0.288	1.585	61.953	61.9535	0.76093	99.86
																														Endoparasitoid	dEVEs_Numbers	4.619	1.318	9.124	0.29	99.7095	0.00581	100	99.97		Endoparasitoid	dEVEs_Numbers	4.188	0.763	9.036	1.453	98.547	0.02906	100
																														Ectoparasitoid	dEVEs_Numbers	0.393	0.053	0.928	91.066	91.0665	0.17867	100	99.97		Ectoparasitoid	dEVEs_Numbers	0.243	0.023	0.684	95.767	95.767	0.08466	100
																														Eusocial	dEVEs_Numbers	1.256	0.384	2.467	32.807	67.1925	0.65615	100	99.97		Eusocial	dEVEs_Numbers	0.934	0.149	2.036	53.961	53.9615	0.92077	100
	ssDNA (A | B | C | D)										ssDNA (A)										ssDNA (A | B | C | D | E | F)										ssDNA (A | B | C | D) - with eusociality											ssDNA (A) - with eusociality
Lifestyles	Type	Median	CI_low	CI_high	ROPE_Percentage (%)	pd (%)	pvalue	% Endo > Ecto		Lifestyles	Type	Median	CI_low	CI_high	ROPE_Percentage (%)	pd (%)	pvalue	% Endo > Ecto		Lifestyles	Type	Median	CI_low	CI_high	ROPE_Percentage (%)	pd (%)	pvalue	% Endo > Ecto		Lifestyles	Type	Median	CI_low	CI_high	ROPE_Percentage (%)	pd (%)	pvalue	% Endo > Ecto	% Endo > Eusocio		Lifestyles	Type	Median	CI_low	CI_high	ROPE_Percentage (%)	pd (%)	pvalue	% Endo > Ecto
Endoparasitoid	EVEs_Events	0.226	0.023	0.496	99.446	99.446	0.01108	17.87		Endoparasitoid	EVEs_Events	0.349	0.008	0.949	90.152	90.1515	0.19697	44.23		Endoparasitoid	EVEs_Events	0.260391	0.0539361	0.535263	99.47	99.47	0.0106	11.17		Endoparasitoid	EVEs_Events	0.881	0.048	3.396	54.944	54.9435	0.90113	16.36	0.31		Endoparasitoid	EVEs_Events	0.881	0.05	3.393	54.91	54.9105	0.90179	16.42
Ectoparasitoid	EVEs_Events	0.496	0.092	1.062	87.912	87.912	0.24176	17.87		Ectoparasitoid	EVEs_Events	0.416	0.014	1.158	84.864	84.8645	0.30271	44.23		Ectoparasitoid	EVEs_Events	0.614761	0.189122	1.1489	84.1385	84.1385	0.31723	11.17		Ectoparasitoid	EVEs_Events	1.996	0.089	6.886	22.868	77.132	0.45736	16.36	0.31		Ectoparasitoid	EVEs_Events	1.989	0.089	6.863	22.904	77.0955	0.45809	16.42
Endoparasitoid	dEVEs_Events	0.241	0	0.956	90.001	90.001	0.19998	22.94		Endoparasitoid	dEVEs_Events	0.276	0	1.341	84.311	84.3115	0.31377	39.75		Endoparasitoid	dEVEs_Events	0.240718	5.96776e-05	0.955311	90.0025	90.0025	0.19995	22.84		Eusocial	EVEs_Events	5.209	0.715	16.591	1.153	98.847	0.02306	16.36	0.31		Eusocial	EVEs_Events	5.241	0.675	16.476	1.126	98.8745	0.02251	16.42
Ectoparasitoid	dEVEs_Events	0.617	0.014	2.243	66.228	66.228	0.67544	22.94		Ectoparasitoid	dEVEs_Events	0.485	0	3.284	68.989	68.989	0.62022	39.75		Ectoparasitoid	dEVEs_Events	0.613579	0.012916	2.24555	66.3935	66.3935	0.67213	22.84		Endoparasitoid	dEVEs_Events	726596	0	8818313618037590	1.432	98.5685	0.02863	29.32	17.51		Endoparasitoid	dEVEs_Events	756448	0	8756614045691440	1.437	98.563	0.02874	29.31
Endoparasitoid	EVEs_Numbers	0.178	0.02	0.444	99.195	99.195	0.0161	15.01		Endoparasitoid	EVEs_Numbers	0.129	0.001	0.411	98.028	98.0285	0.03943	10.81		Endoparasitoid	EVEs_Numbers	0.215617	0.0324117	0.465869	99.556	99.556	0.00888	13.38		Ectoparasitoid	dEVEs_Events	1.73759e+06	0.064	2.31636e+16	0.89	99.1095	0.01781	29.32	17.51		Ectoparasitoid	dEVEs_Events	1.80593e+06	0.064	2.31636e+16	0.895	99.105	0.0179	29.31
Ectoparasitoid	EVEs_Numbers	0.431	0.061	0.972	89.814	89.8135	0.20373	15.01		Ectoparasitoid	EVEs_Numbers	0.724	0.028	2.005	63.943	63.9425	0.72115	10.81		Ectoparasitoid	EVEs_Numbers	0.487132	0.12653	0.957128	91.1585	91.1585	0.17683	13.38		Eusocial	dEVEs_Events	1.92976e+06	0.043	2.35955e+16	0.276	99.7235	0.00553	29.32	17.51		Eusocial	dEVEs_Events	2.02293e+06	0.043	2.35955e+16	0.288	99.7125	0.00575	29.31
Endoparasitoid	dEVEs_Numbers	0.169	0	0.872	90.81	90.81	0.1838	30.21		Endoparasitoid	dEVEs_Numbers	0.13	0	0.879	90.687	90.687	0.18626	29.94		Endoparasitoid	dEVEs_Numbers	0.168507	6.32939e-06	0.872131	90.818	90.818	0.18364	30.37		Endoparasitoid	EVEs_Numbers	1.635	0.02	6.325	30.59	69.4095	0.61181	25.2	1.24		Endoparasitoid	EVEs_Numbers	1.634	0.071	6.298	30.597	69.403	0.61194	25.15
Ectoparasitoid	dEVEs_Numbers	0.38	0.001	2.276	75.502	75.5025	0.48995	30.21		Ectoparasitoid	dEVEs_Numbers	0.481	0	3.774	66.904	66.9045	0.66191	29.94		Ectoparasitoid	dEVEs_Numbers	0.377443	0.000884203	2.26599	75.6355	75.6355	0.48729	30.37		Ectoparasitoid	EVEs_Numbers	2.805	0.135	11.461	14.991	85.009	0.29982	25.2	1.24		Ectoparasitoid	EVEs_Numbers	2.819	0.076	11.245	14.825	85.175	0.2965	25.15
																														Eusocial	EVEs_Numbers	6.896	0.426	22.906	1.551	98.4485	0.03103	25.2	1.24		Eusocial	EVEs_Numbers	6.883	0.569	23.019	1.574	98.4255	0.03149	25.15
																														Endoparasitoid	dEVEs_Numbers	3.89625e+06	0	2.28582e+16	1.157	98.8435	0.02313	34.18	18.73		Endoparasitoid	dEVEs_Numbers	3.89625e+06	0	2.72116e+16	1.131	98.8695	0.02261	34.21
																														Ectoparasitoid	dEVEs_Numbers	8.94722e+06	0	6.42286e+16	1.056	98.9445	0.02111	34.18	18.73		Ectoparasitoid	dEVEs_Numbers	8.85704e+06	0	6.48206e+16	1.035	98.9645	0.02071	34.21
																														Eusocial	dEVEs_Numbers	1.16115e+07	0	6.17151e+16	0.548	99.4515	0.01097	34.18	18.73		Eusocial	dEVEs_Numbers	1.12499e+07	0	6.46352e+16	0.546	99.454	0.01092	34.21
	ssRNA (A | B | C | D)										ssRNA (A)										ssRNA (A | B | C | D | E)										ssRNA (A | B | C | D) - with eusociality											ssRNA (A) - with eusociality
Lifestyles	Type	Median	CI_low	CI_high	ROPE_Percentage (%)	pd (%)	pvalue	% Endo > Ecto		Lifestyles	Type	Median	CI_low	CI_high	ROPE_Percentage (%)	pd (%)	pvalue	% Endo > Ecto		Lifestyles	Type	Median	CI_low	CI_high	ROPE_Percentage (%)	pd (%)	pvalue	% Endo > Ecto		Lifestyles	Type	Median	CI_low	CI_high	ROPE_Percentage (%)	pd (%)	pvalue	% Endo > Ecto	% Endo > Eusocio		Lifestyles	Type	Median	CI_low	CI_high	ROPE_Percentage (%)	pd (%)	pvalue	% Endo > Ecto
Endoparasitoid	EVEs_Events	0.929	0.521	1.427	60.353	60.353	0.79294	97.17		Endoparasitoid	EVEs_Events	0.915	0.462	1.514	59.992	59.992	0.80016	93.63		Endoparasitoid	EVEs_Events	1.00738	0.518937	1.48941	49.364	50.636	0.98728	94.93		Endoparasitoid	EVEs_Events	1.145	0.513	1.92	35.729	64.2705	0.71459	98.37	54.85		Endoparasitoid	EVEs_Events	1.146	0.455	1.861	35.648	64.352	0.71296	98.36
Ectoparasitoid	EVEs_Events	0.399	0.175	0.673	98.93	98.9305	0.02139	97.17		Ectoparasitoid	EVEs_Events	0.411	0.122	0.776	96.358	96.358	0.07284	93.63		Ectoparasitoid	EVEs_Events	0.486761	0.208022	0.814416	96.5375	96.5375	0.06925	94.93		Ectoparasitoid	EVEs_Events	0.479	0.147	0.86	93.846	93.846	0.12308	98.37	54.85		Ectoparasitoid	EVEs_Events	0.479	0.151	0.864	93.823	93.823	0.12354	98.36
Endoparasitoid	dEVEs_Events	0.63	0.211	1.166	83.492	83.492	0.33016	98.37		Endoparasitoid	dEVEs_Events	0.563	0.121	1.125	84.813	84.813	0.30374	99.98		Endoparasitoid	dEVEs_Events	0.629002	0.211237	1.16587	83.5365	83.5365	0.32927	98.39		Eusocial	EVEs_Events	1.11	0.495	1.845	38.584	61.4155	0.77169	98.37	54.85		Eusocial	EVEs_Events	1.11	0.495	1.845	38.58	61.42	0.7716	98.36
Ectoparasitoid	dEVEs_Events	0.071	0	0.241	99.767	99.767	0.00466	98.37		Ectoparasitoid	dEVEs_Events	0	0	0.007	99.999	99.9985	3e-05	99.98		Ectoparasitoid	dEVEs_Events	0.0714748	4.35166e-05	0.24078	99.7675	99.7675	0.00465	98.39		Endoparasitoid	dEVEs_Events	0.807	0.214	1.738	64.239	64.239	0.71522	98.96	28.19		Endoparasitoid	dEVEs_Events	0.807	0.195	1.71	64.424	64.4235	0.71153	98.99
Endoparasitoid	EVEs_Numbers	0.89	0.433	1.323	64.425	64.425	0.7115	97.58		Endoparasitoid	EVEs_Numbers	0.887	0.45	1.487	63.13	63.13	0.7374	94.12		Endoparasitoid	EVEs_Numbers	0.946143	0.489596	1.43345	56.9185	56.9185	0.86163	96.05		Ectoparasitoid	dEVEs_Events	0.077	0	0.314	99.311	99.3115	0.01377	98.96	28.19		Ectoparasitoid	dEVEs_Events	0.077	0	0.314	99.344	99.344	0.01312	98.99
Ectoparasitoid	EVEs_Numbers	0.351	0.155	0.617	99.161	99.161	0.01678	97.58		Ectoparasitoid	EVEs_Numbers	0.373	0.099	0.719	96.774	96.7735	0.06453	94.12		Ectoparasitoid	EVEs_Numbers	0.44178	0.190917	0.740094	97.6635	97.6635	0.04673	96.05		Eusocial	dEVEs_Events	1.057	0.33	2.275	46.407	53.593	0.92814	98.96	28.19		Eusocial	dEVEs_Events	1.056	0.252	2.183	46.556	53.4435	0.93113	98.99
Endoparasitoid	dEVEs_Numbers	0.567	0.192	1.071	88.024	88.024	0.23952	98.29		Endoparasitoid	dEVEs_Numbers	0.551	0.141	1.137	85.158	85.1585	0.29683	99.93		Endoparasitoid	dEVEs_Numbers	0.568609	0.189986	1.07379	87.8985	87.8985	0.24203	98.3		Endoparasitoid	EVEs_Numbers	1.202	0.473	2.003	31.849	68.1515	0.63697	97.89	47.1		Endoparasitoid	EVEs_Numbers	1.201	0.478	2.003	31.949	68.0515	0.63897	97.95
Ectoparasitoid	dEVEs_Numbers	0.062	0	0.226	99.78	99.78	0.0044	98.29		Ectoparasitoid	dEVEs_Numbers	0	0	0.007	99.999	99.999	2e-05	99.93		Ectoparasitoid	dEVEs_Numbers	0.0618717	1.04578e-05	0.223862	99.7935	99.7935	0.00413	98.3		Ectoparasitoid	EVEs_Numbers	0.454	0.137	0.856	94.119	94.119	0.11762	97.89	47.1		Ectoparasitoid	EVEs_Numbers	0.453	0.144	0.858	94.263	94.2635	0.11473	97.95
																														Eusocial	EVEs_Numbers	1.232	0.53	2.02	29.79	70.2095	0.59581	97.89	47.1		Eusocial	EVEs_Numbers	1.232	0.53	2.02	29.825	70.175	0.5965	97.95
																														Endoparasitoid	dEVEs_Numbers	0.834	0.163	1.787	60.66	60.6605	0.78679	99.12	25.28		Endoparasitoid	dEVEs_Numbers	0.836	0.151	1.79	60.617	60.617	0.78766	99.15
																														Ectoparasitoid	dEVEs_Numbers	0.073	0	0.308	98.925	98.9245	0.02151	99.12	25.28		Ectoparasitoid	dEVEs_Numbers	0.072	0	0.307	98.988	98.9875	0.02025	99.15
																														Eusocial	dEVEs_Numbers	1.171	0.222	2.514	39.307	60.693	0.78614	99.12	25.28		Eusocial	dEVEs_Numbers	1.168	0.222	2.511	39.44	60.5595	0.78881	99.15
	dsRNA (A | B | C | D)										dsRNA (A)										dsRNA (A | B | C | D | E | F)										dsRNA (A | B | C | D) - with eusociality											dsRNA (A) - with eusociality
Lifestyles	Type	Median	CI_low	CI_high	ROPE_Percentage (%)	pd (%)	pvalue	% Endo > Ecto		Lifestyles	Type	Median	CI_low	CI_high	ROPE_Percentage (%)	pd (%)	pvalue	% Endo > Ecto		Lifestyles	Type	Median	CI_low	CI_high	ROPE_Percentage (%)	pd (%)	pvalue	% Endo > Ecto		Lifestyles	Type	Median	CI_low	CI_high	ROPE_Percentage (%)	pd (%)	pvalue	% Endo > Ecto	% Endo > Eusocio		Lifestyles	Type	Median	CI_low	CI_high	ROPE_Percentage (%)	pd (%)	pvalue	% Endo > Ecto
Endoparasitoid	EVEs_Events	2.291	1.076	3.814	1.31	98.6895	0.02621	90.76		Endoparasitoid	EVEs_Events	2.248	0.879	4.093	3.401	96.5985	0.06803	89.02		Endoparasitoid	EVEs_Events	2.50795	1.20148	4.22071	0.6055	99.3945	0.01211	93.15
Ectoparasitoid	EVEs_Events	1.352	0.442	2.322	24.522	75.478	0.49044	90.76		Ectoparasitoid	EVEs_Events	1.141	0.255	2.345	40.987	59.0125	0.81975	89.02		Ectoparasitoid	EVEs_Events	1.3592	0.543698	2.3308	23.9435	76.0565	0.47887	93.15		Endoparasitoid	EVEs_Events	2.775	0.89	5.385	1.958	98.042	0.03916	94.56	99.89		Endoparasitoid	EVEs_Events	2.776	0.868	5.344	1.949	98.0505	0.03899	94.52
Endoparasitoid	dEVEs_Events	4.21	0.083	16.553	7.77	92.2305	0.15539	49.14		Endoparasitoid	dEVEs_Events	3.68	0.074	16.583	11.631	88.3695	0.23261	60.18		Endoparasitoid	dEVEs_Events	3.38355	0.057976	12.2818	11.172	88.828	0.22344	39.58		Ectoparasitoid	EVEs_Events	1.377	0.346	3.046	29.102	70.8975	0.58205	94.56	99.89		Ectoparasitoid	EVEs_Events	1.376	0.346	3.046	29.161	70.839	0.58322	94.52
Ectoparasitoid	dEVEs_Events	4.354	0.011	17.922	9.099	90.901	0.18198	49.14		Ectoparasitoid	dEVEs_Events	2.713	0.029	15.243	21.19	78.81	0.4238	60.18		Ectoparasitoid	dEVEs_Events	4.43644	0.115938	17.2778	7.972	92.028	0.15944	39.58		Eusocial	EVEs_Events	0.87	0.234	1.838	59.94	59.94	0.8012	94.56	99.89		Eusocial	EVEs_Events	0.866	0.234	1.837	60.043	60.043	0.79914	94.52
Endoparasitoid	EVEs_Numbers	2.448	1.104	4.033	0.923	99.0765	0.01847	95.24		Endoparasitoid	EVEs_Numbers	2.196	0.814	3.919	4.561	95.4395	0.09121	89.99		Endoparasitoid	EVEs_Numbers	2.65222	1.12771	4.42639	0.5535	99.4465	0.01107	96.7		Endoparasitoid	dEVEs_Events	1.729	0.015	6.93	29.998	70.0015	0.59997	51.55	99.86		Endoparasitoid	dEVEs_Events	1.722	0.016	7.013	30.146	69.854	0.60292	51.64
Ectoparasitoid	EVEs_Numbers	1.234	0.479	2.209	32.261	67.7385	0.64523	95.24		Ectoparasitoid	EVEs_Numbers	1.049	0.27	2.3	46.797	53.2035	0.93593	89.99		Ectoparasitoid	EVEs_Numbers	1.29337	0.468523	2.27488	28.783	71.217	0.57566	96.7		Ectoparasitoid	dEVEs_Events	1.639	0.021	7.534	33.484	66.5155	0.66969	51.55	99.86		Ectoparasitoid	dEVEs_Events	1.639	0	7.541	33.524	66.476	0.67048	51.64
Endoparasitoid	dEVEs_Numbers	4.424	0.05	17.377	8.755	91.245	0.1751	47.92		Endoparasitoid	dEVEs_Numbers	3.704	0	16.932	11.466	88.5345	0.22931	60.35		Endoparasitoid	dEVEs_Numbers	3.22225	0.0414658	12.4385	13.1635	86.8365	0.26327	35.45		Eusocial	dEVEs_Events	0	0	0.089	99.126	99.1265	0.01747	51.55	99.86		Eusocial	dEVEs_Events	0	0	0.086	99.092	99.0915	0.01817	51.64
Ectoparasitoid	dEVEs_Numbers	4.77	0.057	20.627	8.136	91.8635	0.16273	47.92		Ectoparasitoid	dEVEs_Numbers	2.766	0.003	15.024	20.844	79.156	0.41688	60.35		Ectoparasitoid	dEVEs_Numbers	4.78786	0.0687524	20.229	7.5495	92.4505	0.15099	35.45		Endoparasitoid	EVEs_Numbers	2.482	0.754	4.731	3.451	96.549	0.06902	96.84	99.92		Endoparasitoid	EVEs_Numbers	2.494	0.672	4.687	3.483	96.5175	0.06965	96.89
																														Ectoparasitoid	EVEs_Numbers	1.092	0.274	2.286	43.688	56.312	0.87376	96.84	99.92		Ectoparasitoid	EVEs_Numbers	1.097	0.269	2.286	43.442	56.558	0.86884	96.89
																														Eusocial	EVEs_Numbers	0.697	0.17	1.414	74.24	74.2395	0.51521	96.84	99.92		Eusocial	EVEs_Numbers	0.699	0.164	1.411	74.164	74.1645	0.51671	96.89
																														Endoparasitoid	dEVEs_Numbers	1.718	0	7.218	31.034	68.966	0.62068	49.92	99.79		Endoparasitoid	dEVEs_Numbers	1.729	0	7.231	30.972	69.028	0.61944	49.93
																														Ectoparasitoid	dEVEs_Numbers	1.733	0	8.371	32.579	67.421	0.65158	49.92	99.79		Ectoparasitoid	dEVEs_Numbers	1.735	0	8.371	32.596	67.4035	0.65193	49.93
																														Eusocial	dEVEs_Numbers	0	0	0.075	98.874	98.8735	0.02253	49.92	99.79		Eusocial	dEVEs_Numbers	0	0	0.078	98.927	98.927	0.02146	49.93
	dsDNA (A | B | C | D)										dsDNA (A)										dsDNA (A | B | C | D | E | F)										dsDNA (A | B | C | D) - with eusociality											dsDNA (A) - with eusociality
Lifestyles	Type	Median	CI_low	CI_high	ROPE_Percentage (%)	pd (%)	pvalue	% Endo > Ecto		Lifestyles	Type	Median	CI_low	CI_high	ROPE_Percentage (%)	pd (%)	pvalue	% Endo > Ecto		Lifestyles	Type	Median	CI_low	CI_high	ROPE_Percentage (%)	pd (%)	pvalue	% Endo > Ecto		Lifestyles	Type	Median	CI_low	CI_high	ROPE_Percentage (%)	pd (%)	pvalue	% Endo > Ecto	% Endo > Eusocio		Lifestyles	Type	Median	CI_low	CI_high	ROPE_Percentage (%)	pd (%)	pvalue	% Endo > Ecto
Endoparasitoid	EVEs_Events	2.468	1.565	3.557	0.002	99.9985	3e-05	98.79		Endoparasitoid	EVEs_Events	3.433	1.706	5.371	0	99.9995	1e-05	99.2		Endoparasitoid	EVEs_Events	2.46438	1.62779	3.54632	0.052	99.948	0.00104	99.2		Endoparasitoid	EVEs_Events	3.032	1.389	4.867	0.048	99.9515	0.00097	99.01	100		Endoparasitoid	EVEs_Events	2.558	1.005	4.58	1.542	98.458	0.03084	99.6
Ectoparasitoid	EVEs_Events	1.076	0.522	1.747	41.27	58.73	0.8254	98.79		Ectoparasitoid	EVEs_Events	1.089	0.363	2.073	43.236	56.7645	0.86471	99.2		Ectoparasitoid	EVEs_Events	1.04569	0.53752	1.67752	45.069	54.931	0.90138	99.2		Ectoparasitoid	EVEs_Events	1.293	0.435	2.398	29.979	70.0215	0.59957	99.01	100		Ectoparasitoid	EVEs_Events	0.778	0.212	1.696	66.831	66.831	0.66338	99.6
Endoparasitoid	dEVEs_Events	3.679	1.724	6.174	0.052	99.9475	0.00105	100		Endoparasitoid	dEVEs_Events	4.845	1.813	8.791	0.002	99.998	4e-05	100		Endoparasitoid	dEVEs_Events	3.69006	1.74643	6.17439	0.061	99.939	0.00122	100		Eusocial	EVEs_Events	0.946	0.438	1.587	55.488	55.488	0.89024	99.01	100		Eusocial	EVEs_Events	0.448	0.128	0.876	93.805	93.805	0.1239	99.6
Ectoparasitoid	dEVEs_Events	0.141	0	0.501	98.16	98.1605	0.03679	100		Ectoparasitoid	dEVEs_Events	0.221	0	0.814	92.434	92.434	0.15132	100		Ectoparasitoid	dEVEs_Events	0.141391	0.00023347	0.49928	98.173	98.173	0.03654	100		Endoparasitoid	dEVEs_Events	3.641	1.092	7.844	0.723	99.277	0.01446	100	99.96		Endoparasitoid	dEVEs_Events	3.607	1.027	8.399	0.997	99.0025	0.01995	100
Endoparasitoid	EVEs_Numbers	4.639	2.033	7.828	0.002	99.9985	3e-05	99.61		Endoparasitoid	EVEs_Numbers	4.762	1.508	9.351	0.131	99.869	0.00262	97.29		Endoparasitoid	EVEs_Numbers	2.17241	0.843953	3.85764	3.3245	96.6755	0.06649	94		Ectoparasitoid	dEVEs_Events	0.123	0	0.483	97.808	97.8075	0.04385	100	99.96		Ectoparasitoid	dEVEs_Events	0.155	0	0.609	95.678	95.6785	0.08643	100
Ectoparasitoid	EVEs_Numbers	0.976	0.356	1.831	51.953	51.9535	0.96093	99.61		Ectoparasitoid	EVEs_Numbers	1.041	0.206	2.43	48.049	51.951	0.96098	97.29		Ectoparasitoid	EVEs_Numbers	0.776392	0.247035	1.60285	67.9715	67.9715	0.64057	94		Eusocial	dEVEs_Events	0.692	0.143	1.612	70.984	70.984	0.58032	100	99.96		Eusocial	dEVEs_Events	0.338	0.024	0.907	90.958	90.958	0.18084	100
Endoparasitoid	dEVEs_Numbers	7.468	2.402	15.646	0.03	99.9705	0.00059	100		Endoparasitoid	dEVEs_Numbers	9.387	1.909	20.116	0.059	99.9415	0.00117	99.92		Endoparasitoid	dEVEs_Numbers	7.46235	2.29904	15.3474	0.02	99.98	0.0004	100		Endoparasitoid	EVEs_Numbers	8.323	2.29	16.594	0.005	99.995	0.0001	99.95	100		Endoparasitoid	EVEs_Numbers	6.313	0.827	14.357	1.232	98.7685	0.02463	99.48
Ectoparasitoid	dEVEs_Numbers	0.092	0	0.401	98.41	98.41	0.0318	100		Ectoparasitoid	dEVEs_Numbers	0.138	0	0.675	93.862	93.862	0.12276	99.92		Ectoparasitoid	dEVEs_Numbers	0.0907788	1.96218e-05	0.381309	98.334	98.334	0.03332	100		Ectoparasitoid	EVEs_Numbers	1.544	0.323	3.309	24.63	75.3705	0.49259	99.95	100		Ectoparasitoid	EVEs_Numbers	1.065	0.088	3.072	46.859	53.141	0.93718	99.48
																														Eusocial	EVEs_Numbers	1.578	0.462	3.093	19.45	80.55	0.389	99.95	100		Eusocial	EVEs_Numbers	0.987	0.11	2.35	50.699	50.699	0.98602	99.48
																														Endoparasitoid	dEVEs_Numbers	12.263	0.983	33.526	0.246	99.754	0.00492	100	100		Endoparasitoid	dEVEs_Numbers	12.744	0.414	39.786	0.709	99.291	0.01418	99.97
																														Ectoparasitoid	dEVEs_Numbers	0.114	0	0.6	95.073	95.0725	0.09855	100	100		Ectoparasitoid	dEVEs_Numbers	0.141	0	0.893	90.544	90.544	0.18912	99.97
																														Eusocial	dEVEs_Numbers	1.276	0.089	3.485	38.085	61.915	0.7617	100	100		Eusocial	dEVEs_Numbers	0.989	0.021	3.137	50.502	50.5015	0.98997	99.97
	dsDNA (A | B | C | D | without controls)										dsDNA (A | without controls)										dsDNA (A | B | C | D | E | F | without controls)										dsDNA (A | B | C | D | without controls) - with eusociality											dsDNA (A | without controls) - with eusociality
Lifestyles	Type	Median	CI_low	CI_high	ROPE_Percentage (%)	pd (%)	pvalue	% Endo > Ecto		Lifestyles	Type	Median	CI_low	CI_high	ROPE_Percentage (%)	pd (%)	pvalue	% Endo > Ecto		Lifestyles	Type	Median	CI_low	CI_high	ROPE_Percentage (%)	pd (%)	pvalue	% Endo > Ecto		Lifestyles	Type	Median	CI_low	CI_high	ROPE_Percentage (%)	pd (%)	pvalue	% Endo > Ecto	% Endo > Eusocio		Lifestyles	Type	Median	CI_low	CI_high	ROPE_Percentage (%)	pd (%)	pvalue	% Endo > Ecto
Endoparasitoid	EVEs_Events	2.432	1.587	3.497	0.052	99.9485	0.00103	98.61		Endoparasitoid	EVEs_Events	3.395	1.676	5.232	0.059	99.9415	0.00117	98.92		Endoparasitoid	EVEs_Events	2.401	1.552	3.342	0.001	99.999	2e-05	99.07		Endoparasitoid	EVEs_Events	2.993	1.438	4.739	0.077	99.923	0.00154	99.35	99.99		Endoparasitoid	EVEs_Events	2.448	1.002	4.389	1.68	98.32	0.0336	99.47
Ectoparasitoid	EVEs_Events	1.086	0.553	1.766	40.18	59.82	0.8036	98.61		Ectoparasitoid	EVEs_Events	1.163	0.435	2.185	37.5	62.4995	0.75001	98.92		Ectoparasitoid	EVEs_Events	1.046	0.52	1.64	44.609	55.391	0.89218	99.07		Ectoparasitoid	EVEs_Events	1.3	0.417	2.346	27.772	72.228	0.55544	99.35	99.99		Ectoparasitoid	EVEs_Events	0.78	0.198	1.569	67.096	67.096	0.65808	99.47
Endoparasitoid	dEVEs_Events	3.459	1.567	6.023	0.014	99.9865	0.00027	100		Endoparasitoid	dEVEs_Events	3.829	1.461	7.159	0.17	99.83	0.0034	99.93		Endoparasitoid	dEVEs_Events	3.366	1.429	5.445	0.009	99.9915	0.00017	100		Eusocial	EVEs_Events	0.94	0.455	1.619	57.045	57.045	0.8591	99.35	99.99		Eusocial	EVEs_Events	0.387	0.111	0.773	96.062	96.0625	0.07875	99.47
Ectoparasitoid	dEVEs_Events	0.141	0	0.496	98.234	98.234	0.03532	100		Ectoparasitoid	dEVEs_Events	0.24	0	0.841	92.495	92.4955	0.15009	99.93		Ectoparasitoid	dEVEs_Events	0.151	0	0.505	97.608	97.6075	0.04785	100		Endoparasitoid	dEVEs_Events	3.408	0.941	6.933	0.622	99.378	0.01244	100	100		Endoparasitoid	dEVEs_Events	2.961	0.747	6.725	3.145	96.8545	0.06291	99.99
Endoparasitoid	EVEs_Numbers	2.589	1.22	4.261	0.623	99.377	0.01246	96.7		Endoparasitoid	EVEs_Numbers	1.925	0.658	3.323	7.114	92.8865	0.14227	83.8		Endoparasitoid	EVEs_Numbers	1.37	0.574	2.445	22.948	77.0515	0.45897	81.94		Ectoparasitoid	dEVEs_Events	0.12	0	0.468	98.214	98.2135	0.03573	100	100		Ectoparasitoid	dEVEs_Events	0.162	0	0.661	94.268	94.2675	0.11465	99.99
Ectoparasitoid	EVEs_Numbers	0.969	0.381	1.806	52.202	52.2015	0.95597	96.7		Ectoparasitoid	EVEs_Numbers	1.021	0.254	2.108	48.509	51.491	0.97018	83.8		Ectoparasitoid	EVEs_Numbers	0.781	0.284	1.552	68.393	68.3935	0.63213	81.94		Eusocial	dEVEs_Events	0.707	0.118	1.521	70.847	70.847	0.58306	100	100		Eusocial	dEVEs_Events	0.338	0.027	0.911	91.061	91.0615	0.17877	99.99
Endoparasitoid	dEVEs_Numbers	2.739	1.115	4.926	1.242	98.7585	0.02483	99.99		Endoparasitoid	dEVEs_Numbers	2.277	0.713	4.448	5.477	94.523	0.10954	99.51		Endoparasitoid	dEVEs_Numbers	2.73	1.095	4.962	1.283	98.717	0.02566	99.98		Endoparasitoid	EVEs_Numbers	4.794	1.271	8.953	0.222	99.7785	0.00443	98.49	99.7		Endoparasitoid	EVEs_Numbers	2.281	0.488	4.933	9.03	90.9695	0.18061	85.87
Ectoparasitoid	dEVEs_Numbers	0.086	0	0.343	99.152	99.152	0.01696	99.99		Ectoparasitoid	dEVEs_Numbers	0.133	0	0.539	96.879	96.8795	0.06241	99.51		Ectoparasitoid	dEVEs_Numbers	0.087	0	0.337	99.345	99.345	0.0131	99.98		Ectoparasitoid	EVEs_Numbers	1.63	0.354	3.482	21.395	78.6055	0.42789	98.49	99.7		Ectoparasitoid	EVEs_Numbers	1.167	0.161	3.024	41.522	58.4775	0.83045	85.87
																														Eusocial	EVEs_Numbers	1.642	0.509	3.174	16.804	83.1965	0.33607	98.49	99.7		Eusocial	EVEs_Numbers	0.976	0.151	2.059	51.279	51.2785	0.97443	85.87
																														Endoparasitoid	dEVEs_Numbers	4.757	0.906	11.088	1.091	98.9085	0.02183	100	98.84		Endoparasitoid	dEVEs_Numbers	3.442	0.356	9.218	4.928	95.072	0.09856	99.81
																														Ectoparasitoid	dEVEs_Numbers	0.132	0	0.608	95.29	95.2905	0.09419	100	98.84		Ectoparasitoid	dEVEs_Numbers	0.166	0	0.869	91.036	91.0365	0.17927	99.81
																														Eusocial	dEVEs_Numbers	1.571	0.228	3.892	26.012	73.9875	0.52025	100	98.84		Eusocial	dEVEs_Numbers	1.203	0.078	3.436	39.938	60.0615	0.79877	99.81
Significantly less than free-living
Significantly more than free-living
[truncated: 1 more columns]

## Sheet: Genome_quality_effect
EVEs Numbers (A|B|C|D)
Variable	Estimate	Std_Error	z_value	Pr(>|z|)
% BUSCO	-0.018179034175295	0.0210064384204831	-0.865402968909229	0.386817652045027
N50	-3.21445636605588e-08	2.82904803640616e-08	-1.13623251521007	0.255859265740333
EVEs Events (A|B|C|D)
Variable	Estimate	Std_Error	z_value	Pr(>|z|)
% BUSCO	-0.0111684138645912	0.0136124000661626	-0.820458832410706	0.411954588542101
N50	8.40506111099952e-10	1.89648889166076e-08	0.0443190632328945	0.964650076340972

## Sheet: Genome_size_effect
EVEs Numbers
Genomic structure	Variable	Estimate	Std_Error	z_value	Pr(>|z|)
dsDNA	Genome length (bp)	-1.96724852680744e-09	1.12676467447475e-09	-1.74592669735984	0.0808236901149055
ssDNA	Genome length (bp)	-3.86024521141894e-09	2.09265439484873e-09	-1.84466447059835	0.0650863622830653
dsRNA	Genome length (bp)	7.48664319176791e-11	8.80139215060862e-10	0.0850620340925294	0.932212073278008
ssRNA	Genome length (bp)	2.21783783792474e-09	7.76515283074149e-10	2.85614190250645	0.00428823430952653
dEVEs Numbers
Genomic structure	Variable	Estimate	Std_Error	z_value	Pr(>|z|)
dsDNA	Genome length (bp)	-2.3326272507982e-09	1.43400166192643e-09	-1.62665589080599	0.103810201791945
ssDNA	Genome length (bp)	-1.42357749972167e-09	2.27782291066967e-09	-0.624972860292787	0.53198887063368
dsRNA	Genome length (bp)	-9.37797863580151e-10	2.67264922113122e-09	-0.35088699862499	0.725673125711121
ssRNA	Genome length (bp)	7.23551629884989e-10	1.21577832496243e-09	0.595134503576009	0.551753566581736
EVEs Events
Genomic structure	Variable	Estimate	Std_Error	z_value	Pr(>|z|)
dsDNA	Genome length (bp)	-4.82458399825209e-11	6.40885132891949e-10	-0.0752800112007825	0.939991925098953
ssDNA	Genome length (bp)	-1.32090067341149e-09	1.92661846025601e-09	-0.68560573910206	0.492961761497247
dsRNA	Genome length (bp)	1.085563598927e-09	9.41262476969969e-10	1.15330593271024	0.248784835900857
ssRNA	Genome length (bp)	2.04701307564879e-09	6.93418380933297e-10	2.9520605913181	0.00315660983259168
dEVEs Events
Genomic structure	Variable	Estimate	Std_Error	z_value	Pr(>|z|)
dsDNA	Genome length (bp)	7.25901511333809e-11	8.97340065908936e-10	0.0808948066526515	0.935525610121842
ssDNA	Genome length (bp)	-6.10954270188738e-10	2.74149927549592e-09	-0.22285406954128	0.823649084592767
dsRNA	Genome length (bp)	1.08413563450551e-09	2.80035220651807e-09	0.387142600127973	0.698650641466371
ssRNA	Genome length (bp)	8.09947653358688e-10	1.25507654562493e-09	0.645337255470259	0.518708654665913

## Sheet: Figure_data
Data for the figure2A
	dsDNA	ssDNA	dsRNA	ssRNA	Total
Number of insect species infected	145	78	47	402	672
Number of Hymenoptera species infected	17	1	4	34	56
Total number of endogenization events	131	26	59	152	368
Number of domestication events inferred	47	10	12	38	107
Expected number of endogenization events based on virus distribution in insects	79.4048	42.7143	25.7381	220.143	368
Expected number of domestication events based on virus distribution in insects	23.0878	12.4196	7.48363	64.0089	107
Data for the figure3A
dsDNA	Number of endogenisation Events expected regarding the Hymenoptera lifestyle distribution	Number of Events
Ectoparasitoid	24.96774	15
Free-living	65.54032	42
Endoparasitoid	38.49194	72
ssDNA	Number of endogenisation Events expected regarding the Hymenoptera lifestyle distribution	Number of Events
Ectoparasitoid	12.701613	4
Free-living	4.838710	18
Endoparasitoid	7.459677	3
dsRNA	Number of endogenisation Events expected regarding the Hymenoptera lifestyle distribution	Number of Events
Ectoparasitoid	11.41935	11
Free-living	29.97581	18
Endoparasitoid	17.60484	30
ssRNA	Number of endogenisation Events expected regarding the Hymenoptera lifestyle distribution	Number of Events
Ectoparasitoid	29.41935	13
Free-living	77.22581	85
Endoparasitoid	45.35484	54
Data for the figure3B
dsDNA	Number of endogenisation dEvents expected regarding the Hymenoptera lifestyle distribution	Number of dEvents
Ectoparasitoid	9.096774	2
Free-living	23.879032	13
Endoparasitoid	14.024194	32
ssDNA	Number of endogenisation Events expected regarding the Hymenoptera lifestyle distribution	Number of Events
Ectoparasitoid	1.935484	2
Free-living	5.080645	6
Endoparasitoid	2.983871	2
dsRNA	Number of endogenisation Events expected regarding the Hymenoptera lifestyle distribution	Number of Events
Ectoparasitoid	2.322581	3
Free-living	6.096774	3
Endoparasitoid	3.580645	6
ssRNA	Number of endogenisation Events expected regarding the Hymenoptera lifestyle distribution	Number of Events
Ectoparasitoid	7.354839	1
Free-living	19.306452	25
Endoparasitoid	11.338710	12
