# Supplementary material for: Endoparasitoid lifestyle promotes endogenization and domestication of dsDNA viruses
Source: eLife. 2023 Jun 6;12:e85993. doi: 10.7554/eLife.85993 (PMC10259472; doi:10.7554/eLife.85993)
Supplement: Supplementary file 7. [file elife-85993-supp7.xlsx]

## Sheet: Partition_schemes
Cluster_names	start-end	best_model
Cluster101.aa.ali.trimmed	1-116;	LG+G4:
Cluster104.aa.ali.trimmed	117-202;	Blosum62:
Cluster1079.aa.ali.trimmed	203-302;	LG:
Cluster1107.aa.ali.trimmed	303-378;	PMB+I:
Cluster12.aa.ali.trimmed	379-619;	VT+F+G4:
Cluster121.aa.ali.trimmed	620-787;	LG+G4:
Cluster125.aa.ali.trimmed	788-1011;	VT+I:
Cluster128.aa.ali.trimmed	1012-1193;	LG+G4:
Cluster1288.aa.ali.trimmed	1194-1312;	Blosum62+G4:
Cluster13.aa.ali.trimmed	1313-1679;	LG+F+I:
Cluster132.aa.ali.trimmed	1680-1854;	LG+I:
Cluster135.aa.ali.trimmed	1855-1987;	Blosum62+R3:
Cluster139.aa.ali.trimmed	1988-2729;	VT+F+R4:
Cluster14.aa.ali.trimmed	2730-2963;	LG:
Cluster1413.aa.ali.trimmed	2964-3504;	LG+F+R4:
Cluster142.aa.ali.trimmed	3505-3703;	LG+G4:
Cluster149.aa.ali.trimmed	3704-3829;	VT+R4:
Cluster15.aa.ali.trimmed	3830-3934;	LG+G4:
Cluster153.aa.ali.trimmed	3935-4154;	LG+F+I+G4:
Cluster157.aa.ali.trimmed	4155-4436;	WAG+F+I:
Cluster160.aa.ali.trimmed	4437-4665;	LG+F:
Cluster162.aa.ali.trimmed	4666-4835;	JTTDCMut+F+G4:
Cluster173.aa.ali.trimmed	4836-5079;	LG+R2:
Cluster180.aa.ali.trimmed	5080-5251;	LG+G4:
Cluster182.aa.ali.trimmed	5252-5357;	LG+G4:
Cluster185.aa.ali.trimmed	5358-5677;	FLU+G4:
Cluster19.aa.ali.trimmed	5678-5932;	LG+G4:
Cluster192.aa.ali.trimmed	5933-6183;	LG+F+R2:
Cluster198.aa.ali.trimmed	6184-6464;	LG+G4:
Cluster199.aa.ali.trimmed	6465-7212;	LG+F+R3:
Cluster2.aa.ali.trimmed	7213-7457;	VT+G4:
Cluster2040.aa.ali.trimmed	7458-7678;	VT+F+I+G4:
Cluster206.aa.ali.trimmed	7679-7951;	LG+R3:
Cluster208.aa.ali.trimmed	7952-8193;	LG+F+G4:
Cluster211.aa.ali.trimmed	8194-8442;	VT+I+G4:
Cluster213.aa.ali.trimmed	8443-8585;	LG+F+R2:
Cluster214.aa.ali.trimmed	8586-8673;	LG+G4:
Cluster227.aa.ali.trimmed	8674-9010;	LG+F+G4:
Cluster237.aa.ali.trimmed	9011-9061;	LG+G4:
Cluster24.aa.ali.trimmed	9062-9173;	LG+G4:
Cluster245.aa.ali.trimmed	9174-9312;	LG+R4:
Cluster247.aa.ali.trimmed	9313-9455;	LG:
Cluster252.aa.ali.trimmed	9456-9776;	LG+G4:
Cluster253.aa.ali.trimmed	9777-10004;	LG+G4:
Cluster255.aa.ali.trimmed	10005-10242;	Blosum62+G4:
Cluster257.aa.ali.trimmed	10243-10480;	LG+G4:
Cluster258.aa.ali.trimmed	10481-10751;	Blosum62:
Cluster259.aa.ali.trimmed	10752-10839;	LG:
Cluster266.aa.ali.trimmed	10840-10935;	LG+G4:
Cluster269.aa.ali.trimmed	10936-11255;	FLU+F+G4:
Cluster27.aa.ali.trimmed	11256-11534;	LG+G4:
Cluster277.aa.ali.trimmed	11535-11725;	LG+R2:
Cluster28.aa.ali.trimmed	11726-12117;	WAG+G4:
Cluster280.aa.ali.trimmed	12118-12327;	LG+I+G4:
Cluster29.aa.ali.trimmed	12328-12485;	LG+G4:
Cluster291.aa.ali.trimmed	12486-12892;	LG+G4:
Cluster293.aa.ali.trimmed	12893-13013;	LG+G4:
Cluster294.aa.ali.trimmed	13014-13345;	LG+F+G4:
Cluster297.aa.ali.trimmed	13346-13703;	cpREV+I:
Cluster298.aa.ali.trimmed	13704-13814;	WAG+F+I+G4:
Cluster3.aa.ali.trimmed	13815-14140;	WAG+F+R3:
Cluster300.aa.ali.trimmed	14141-14356;	LG+I+G4:
Cluster302.aa.ali.trimmed	14357-14694;	LG+F+G4:
Cluster303.aa.ali.trimmed	14695-15229;	LG+F+G4:
Cluster304.aa.ali.trimmed	15230-15330;	LG+G4:
Cluster308.aa.ali.trimmed	15331-15553;	LG+G4:
Cluster327.aa.ali.trimmed	15554-15849;	mtZOA+F+R2:
Cluster337.aa.ali.trimmed	15850-16027;	JTT+F:
Cluster344.aa.ali.trimmed	16028-16161;	LG+F+I+G4:
Cluster353.aa.ali.trimmed	16162-16258;	LG+G4:
Cluster354.aa.ali.trimmed	16259-16450;	LG+G4:
Cluster356.aa.ali.trimmed	16451-16869;	LG+F+G4:
Cluster360.aa.ali.trimmed	16870-17093;	LG+G4:
Cluster364.aa.ali.trimmed	17094-17257;	LG+G4:
Cluster366.aa.ali.trimmed	17258-17807;	LG+F+G4:
Cluster369.aa.ali.trimmed	17808-18186;	PMB+F+I:
Cluster374.aa.ali.trimmed	18187-18780;	LG+F+I+G4:
Cluster378.aa.ali.trimmed	18781-18890;	LG+R3:
Cluster38.aa.ali.trimmed	18891-19029;	LG+G4:
Cluster392.aa.ali.trimmed	19030-19232;	LG+G4:
Cluster393.aa.ali.trimmed	19233-19554;	LG+F+G4:
Cluster394.aa.ali.trimmed	19555-19856;	LG+G4:
Cluster4.aa.ali.trimmed	19857-20038;	Blosum62+I:
Cluster417.aa.ali.trimmed	20039-20675;	VT+F+G4:
Cluster427.aa.ali.trimmed	20676-20973;	LG+I+G4:
Cluster438.aa.ali.trimmed	20974-21278;	VT+I:
Cluster44.aa.ali.trimmed	21279-21646;	VT+R2:
Cluster443.aa.ali.trimmed	21647-21801;	LG+G4:
Cluster447.aa.ali.trimmed	21802-22015;	LG+R3:
Cluster45.aa.ali.trimmed	22016-23030;	LG+F+I+G4:
Cluster450.aa.ali.trimmed	23031-23977;	LG+F+I+G4:
Cluster452.aa.ali.trimmed	23978-24069;	LG+G4:
Cluster466.aa.ali.trimmed	24070-24589;	LG+F+R3:
Cluster470.aa.ali.trimmed	24590-25023;	LG+F+G4:
Cluster475.aa.ali.trimmed	25024-25223;	LG+I+G4:
Cluster48.aa.ali.trimmed	25224-25365;	LG+G4:
Cluster495.aa.ali.trimmed	25366-25616;	LG+I+G4:
Cluster497.aa.ali.trimmed	25617-25867;	LG+F+I+G4:
Cluster5.aa.ali.trimmed	25868-26453;	LG+F+G4:
Cluster522.aa.ali.trimmed	26454-26608;	VT+F+R3:
Cluster525.aa.ali.trimmed	26609-26814;	LG+G4:
Cluster527.aa.ali.trimmed	26815-27025;	LG+G4:
Cluster533.aa.ali.trimmed	27026-27162;	LG+R2:
Cluster545.aa.ali.trimmed	27163-27489;	PMB+F+I+G4:
Cluster563.aa.ali.trimmed	27490-27618;	cpREV+G4:
Cluster57.aa.ali.trimmed	27619-27807;	LG+G4:
Cluster574.aa.ali.trimmed	27808-27999;	LG+G4:
Cluster577.aa.ali.trimmed	28000-28302;	VT+R3:
Cluster59.aa.ali.trimmed	28303-28576;	LG+G4:
Cluster599.aa.ali.trimmed	28577-28852;	VT+R2:
Cluster6.aa.ali.trimmed	28853-29219;	LG+F+I:
Cluster604.aa.ali.trimmed	29220-29333;	LG+G4:
Cluster615.aa.ali.trimmed	29334-29664;	LG+G4:
Cluster619.aa.ali.trimmed	29665-30062;	LG+F+G4:
Cluster62.aa.ali.trimmed	30063-30438;	LG+I:
Cluster633.aa.ali.trimmed	30439-30729;	LG+I+G4:
Cluster653.aa.ali.trimmed	30730-30955;	VT+F+R2:
Cluster657.aa.ali.trimmed	30956-31356;	LG+F+G4:
Cluster670.aa.ali.trimmed	31357-31652;	LG+G4:
Cluster696.aa.ali.trimmed	31653-31910;	PMB+R3:
Cluster7.aa.ali.trimmed	31911-32183;	VT+F+I:
Cluster707.aa.ali.trimmed	32184-32643;	WAG+F+G4:
Cluster73.aa.ali.trimmed	32644-32835;	VT:
Cluster738.aa.ali.trimmed	32836-33293;	WAG+F+I+G4:
Cluster74.aa.ali.trimmed	33294-33789;	LG+G4:
Cluster756.aa.ali.trimmed	33790-34039;	LG+F+R3:
Cluster76.aa.ali.trimmed	34040-34197;	LG+I:
Cluster768.aa.ali.trimmed	34198-34470;	LG+I+G4:
Cluster81.aa.ali.trimmed	34471-34588;	cpREV+G4:
Cluster82.aa.ali.trimmed	34589-34873;	LG+G4:
Cluster823.aa.ali.trimmed	34874-35597;	LG+R4:
Cluster84.aa.ali.trimmed	35598-35749;	FLU+F:
Cluster844.aa.ali.trimmed	35750-35812;	LG+G4:
Cluster852.aa.ali.trimmed	35813-36127;	LG+I+G4:
Cluster864.aa.ali.trimmed	36128-36296;	FLU+I:
Cluster886.aa.ali.trimmed	36297-36647;	LG+F+G4:
Cluster893.aa.ali.trimmed	36648-36884;	LG+F+G4:
Cluster90.aa.ali.trimmed	36885-37031;	Blosum62:
Cluster928.aa.ali.trimmed	37032-37482;	VT+F+R4:
Cluster93.aa.ali.trimmed	37483-37716;	WAG+F+I+G4:
Cluster933.aa.ali.trimmed	37717-38031;	LG+R2:
Cluster97.aa.ali.trimmed	38032-38293;	LG+G4:
Best partition models used during the Iqtree dsDNA phylogeny

## Sheet: Nb_gene_per_species
Taxon name	Number of genes
AcMNPV	40
AmFV	15
Aphaenogaster_picea	7
Aphidius_colemani	13
CcBV	14
CiBV	16
CoBV	6
Cotesia_vestalis_BV	16
Cotesia_vestalis_LbFV	6
CpV	41
CuniNPV	22
DFV	24
DhNV	35
DiNV	77
DoEFV	8
EfFV	24
Eupelmus_kiefferi	11
Eurytoma_brunniventris	5
Fopius_arisanus	39
GbNV	53
GpSGHV	20
Harpegnathos_saltator	12
HgNV	37
HzNV-1	39
HzNV-2	40
LbFV	28
LdMNPV	43
Leptopilina_boulardi	12
Leptopilina_clavipes	12
Leptopilina_heterotoma	12
MdSGHV	25
Microplitis_demolitor	16
NeleNV	34
NeseNPV	35
OrNV	79
PcFV	26
Platygaster_orseoliae	14
PmNV	37
PoFV	29
Pseudomyrmex_gracilis	8
ToNV	27
AprostocetusNV?	5
Venturia_canescens	33
WSSV	5
DmNV_esp	72
DmNV_kal	77
DmNV_mau	78
DmNV_tom	77
Number of genes for each taxon used to infer the phylogeny of figure5
