# Supplementary material for: Endoparasitoid lifestyle promotes endogenization and domestication of dsDNA viruses
Source: eLife. 2023 Jun 6;12:e85993. doi: 10.7554/eLife.85993 (PMC10259472; doi:10.7554/eLife.85993)
Supplement: Supplementary file 8. [file elife-85993-supp8.xlsx]

## Sheet: Sample_informations
sample name	sample_title	bioproject_accession	organism	isolation_source	collection_date	geo_loc_name	tissue	collected_by	sex	authorizations (Nagoya protocol)	reference
Anagyrus pseudococci	21a_bis4	PRJNA826991	Anagyrus pseudococci	Unknown	2005/2014	Unknown	whole body	bioplanet	male	not required (company)
Aphidius colemani	2b	PRJNA826991	Aphidius colemani	Unknown	2005/2014	Unknown	whole body	Biobest	female	not required (company)
Campopleginae	14b	PRJNA826991	Campopleginae	French Polynesia	2005/2007	French Polynesia	metasoma	S.Charlat (sc_02317)	female	not required for french legislation (<2015)	Ramage et al. 2017 DOI: 10.5852/ejt.2017.272
Ceratosolen corneri	1bf	PRJNA826991	Ceratosolen corneri	Unknown	2005/2014	Unknown	whole body	J.Y. Rasplus (INRAE)	female	not required for french legislation (<2015)	Rodriguez et al. 2017 DOI: 10.1080/00222933.2017.1293746
Ceratosolen marchali	1a_2	PRJNA826991	Ceratosolen marchali	Unknown	2005/2014	Unknown	whole body	J.Y. Rasplus (INRAE)	female	not required for french legislation (<2015)	Rodriguez et al. 2017 DOI: 10.1080/00222933.2017.1293746
Copidosoma aretas	4a_bis	PRJNA826991	Copidosoma aretas	Denmark	2010-05-31	Denmark: strawberry field on Sealand near the village Eggeslevmagle	35 indiv (unknown sex) 1 brood from one female	L.Sigsgaard (University of Copenhagen, Danemark)	pooled male and female	not required for Danish legislation (<2014)
Cremastinae A	19a1	PRJNA826991	Cremastinae_A	French Polynesia	2005/2007	French Polynesia	metasoma	S.Charlat (sc_01605)	female	not required for french legislation (<2015)	Ramage et al. 2017 DOI: 10.5852/ejt.2017.272
Cremastinae B	19b2	PRJNA826991	Cremastinae_B	French Polynesia	2005/2007	French Polynesia	metasoma	S.Charlat (sc 02202)	female	not required for french legislation (<2015)	Ramage et al. 2017 DOI: 10.5852/ejt.2017.272
Encarsia formosa	2b-bis	PRJNA826991	Encarsia formosa	Unknown	2005/2014	Unknown	Numerous males+females	Koppert	pooled male and female	not required (company)
Eretmocerus eremicus	2a	PRJNA826991	Eretmocerus eremicus	Unknown	2005/2014	Unknown	Numerous males+females	Biobest	pooled male and female	not required (company)
Eupelmus azureus	25b	PRJNA826991	Eupelmus azureus	Provence-Alpes-Cote d'Azur - France	2005/2014	France: Provence-Alpes-Cote d'Azur	metasoma	N. Ris (INRAE)	female	not required for french legislation (<2015)
Eupelmus kiefferi	25a	PRJNA826991	Eupelmus kiefferi	Provence-Alpes-Cote d'Azur - France	2005/2014	France: Provence-Alpes-Cote d'Azur	metasoma	N. Ris (INRAE)	female	not required for french legislation (<2015)
Ichneumoninae A	15a	PRJNA826991	Ichneumoninae_A	French Polynesia	2005/2007	French Polynesia	metasoma	S.Charlat (sc_02298)	female	not required for french legislation (<2015)	Ramage et al. 2017 DOI: 10.5852/ejt.2017.272
Ichneumoninae B	15b	PRJNA826991	Ichneumoninae_B	French Polynesia	2005/2007	French Polynesia	metasoma	S.Charlat (sc_02307)	female	not required for french legislation (<2015)	Ramage et al. 2017 DOI: 10.5852/ejt.2017.272
Leptomastidea abnormis	21b-bis2	PRJNA826991	Leptomastidea abnormis	Unknown	2005/2014	Unknown	whole body	Crisop	female	not required (company)
Meteorus cinctellus	22a	PRJNA826991	Meteorus cinctellus	Sweden: Skane Vomb, vattenverk; 55°39'43.4N 13°32°'50.4E	2014	Sweden: Skane Vomb, vattenverk; 55°39'43.4N 13°32°'50.4E	metasoma	J.Stigenberg (Swedish museum of natural history)	female	not required for swedish legislation (<2016)
Meteorus colon F	22bf	PRJNA826991	Meteorus colon F	Sweden: Skane Vomb, vattenverk; 55°39'43.4N 13°32°'50.4E	2014	Sweden: Skane Vomb, vattenverk; 55°39'43.4N 13°32°'50.4E	metasoma	J.Stigenberg (Swedish museum of natural history)	female	not required for swedish legislation (<2016)
Meteorus colon M	22bm	PRJNA826991	Meteorus colon M	Sweden: Skane Vomb, vattenverk; 55°39'43.4N 13°32°'50.4E	2014	Sweden: Skane Vomb, vattenverk; 55°39'43.4N 13°32°'50.4E	whole body	J.Stigenberg (Swedish museum of natural history)	male	not required for swedish legislation (<2016)
Ophioninae A	18a	PRJNA826991	Ophioninae A	French Polynesia	2005/2007	French Polynesia	metasoma	S.Charlat (sc_01608)	female	not required for french legislation (<2015)	Ramage et al. 2017 DOI: 10.5852/ejt.2017.272
Ophioninae B	18b	PRJNA826991	Ophioninae B	French Polynesia	2005/2007	French Polynesia	metasoma	S.Charlat (Sc_09723)	female	not required for french legislation (<2015)	Ramage et al. 2017 DOI: 10.5852/ejt.2017.272
Platygaster equestris	12b-bis1	PRJNA826991	Platygaster equestris	USA	2015-05-15	USA	metasoma	P.Buhl	female	not required for USA samples	Buhl & Hidayat (2016) DOI: 10.1080/00207233.2015.1092855
Platygaster orseoliae	12a-bis	PRJNA826991	Platygaster orseoliae	USA	2015-05-15	USA	whole body	W.A.Overholt/Peter Buhl	female	not required for USA samples	Buhl & Hidayat (2016) DOI: 10.1080/00207233.2015.1092855
Psyttalia concolor	17b2	PRJNA826991	Psyttalia concolor	Unknown	2005/2014	France	metasoma	INRAE (N. Ris)	female	not required for french legislation (<2015)
Psyttalia lounsburyi	17a	PRJNA826991	Psyttalia lounsburyi	Unknown	2005/2014	France	metasoma	INRAE (N. Ris)	female	not required for french legislation (<2015)
Torymus flavipes	7b	PRJNA826991	Torymus flavipes	Unknown	2005/2014	France	metasoma	INRAE (N. Ris)	female	not required for french legislation (<2015)
Torymus sinensis	7a	PRJNA826991	Torymus sinensis	Unknown	2005/2014	France	metasoma	INRAE (N. Ris)	female	not required for french legislation (<2015)
Trichogramma brassicae	6a	PRJNA826991	Trichogramma brassicae	Unknown	2005/2014	France	unknown	J.M. Delpuech	pooled male and female	not required for french legislation (<2015)
Trichopria drosophilae	8a	PRJNA826991	Trichopria drosophilae	France (Ste Foy)	2005/2014	France: Ste Foy	whole body	J.Varaldi	female	not required for french legislation (<2015)
Trichopria nigra (sp 970989)	8a-bis7	PRJNA826991	Trichopria nigra	United kingdom	2005/2014	United Kingdom	metasoma	D.Notton (Natural history Museum, London)	female	not required for UK legislation (<2016)	Notton 2014 DOI: 10.5852/ejt.2014.75
Trissolcus brochymenae	13b-bis1	PRJNA826991	Trissolcus brochymenae	USA : New York	2015	USA	whole body	E. J. Talamas (USDA/ARS c/o NMNH)	female	not required for USA samples	Talamas et al. 2015 DOI: 10.3897/JHR.43.4661
Trissolcus japonicus	13c-bis2	PRJNA826991	Trissolcus japonicus	USA, MD	2005/2014	USA	whole body	E. J. Talamas (USDA/ARS c/o NMNH)	female	not required for USA samples	Talamas et al. 2015 DOI: 10.3897/JHR.43.4661
Tryphoninae A	20a1	PRJNA826991	Tryphoninae A	French Polynesia	2005/2007	French Polynesia	metasoma	S.Charlat (sc_09817)	female	not required for french legislation (<2015)	Ramage et al. 2017 DOI: 10.5852/ejt.2017.272
Tryphoninae B	20b1	PRJNA826991	Tryphoninae B	French Polynesia	2005/2007	French Polynesia	metasoma	S.Charlat (sc_09811)	female	not required for french legislation (<2015)	Ramage et al. 2017 DOI: 10.5852/ejt.2017.272
Unknown sp (pb Aprostrocetus?)	12a-bis	PRJNA826991	Unknown sp (pb Aprostrocetus?)	USA	2015-05-15	USA	whole body	W.A.Overholt/Peter Buhl	female	not required for USA samples	Buhl & Hidayat (2016) DOI: 10.1080/00207233.2015.1092855
