# Supplementary material for: Endoparasitoid lifestyle promotes endogenization and domestication of dsDNA viruses
Source: eLife. 2023 Jun 6;12:e85993. doi: 10.7554/eLife.85993 (PMC10259472; doi:10.7554/eLife.85993)
Supplement: Supplementary file 10. [file elife-85993-supp10.xlsx]

## Sheet: RNA_seq_reads
Run	AssemblyName	bases	size_MB	LibraryLayout	BioSample	ScientificName	LibraryStrategy	LibrarySelection	LibrarySource	Sex	Analyte_Type	Histological_Type	Body_Site	Tissue	Dev
SRR1015499		6325347780	4165	PAIRED	SAMN02380854	Acromyrmex_echinatior	RNA-Seq	cDNA	TRANSCRIPTOMIC					heads	NA
SRR1015500		2899132560	1959	PAIRED	SAMN02380854	Acromyrmex_echinatior	RNA-Seq	cDNA	TRANSCRIPTOMIC					heads	NA
SRR1015501		3154847040	2105	PAIRED	SAMN02380854	Acromyrmex_echinatior	RNA-Seq	cDNA	TRANSCRIPTOMIC					heads	NA
SRR1015503		3977828460	2622	PAIRED	SAMN02380857	Acromyrmex_echinatior	RNA-Seq	cDNA	TRANSCRIPTOMIC					heads	NA
SRR1015504		3452464080	2321	PAIRED	SAMN02380857	Acromyrmex_echinatior	RNA-Seq	cDNA	TRANSCRIPTOMIC					heads	NA
SRR1015505		3503621700	2344	PAIRED	SAMN02380857	Acromyrmex_echinatior	RNA-Seq	cDNA	TRANSCRIPTOMIC					heads	NA
SRR1015507		3545327700	2368	PAIRED	SAMN02380858	Acromyrmex_echinatior	RNA-Seq	cDNA	TRANSCRIPTOMIC					heads	NA
SRR1015508		3325611960	2251	PAIRED	SAMN02380858	Acromyrmex_echinatior	RNA-Seq	cDNA	TRANSCRIPTOMIC					heads	NA
SRR1015509		3381811920	2295	PAIRED	SAMN02380858	Acromyrmex_echinatior	RNA-Seq	cDNA	TRANSCRIPTOMIC					heads	NA
SRR1015511		4500165780	2993	PAIRED	SAMN02380869	Acromyrmex_echinatior	RNA-Seq	cDNA	TRANSCRIPTOMIC					heads	NA
SRR1015512		2982920580	2027	PAIRED	SAMN02380869	Acromyrmex_echinatior	RNA-Seq	cDNA	TRANSCRIPTOMIC					heads	NA
SRR1015513		3243421800	2187	PAIRED	SAMN02380869	Acromyrmex_echinatior	RNA-Seq	cDNA	TRANSCRIPTOMIC					heads	NA
SRR1015515		3729194820	2475	PAIRED	SAMN02380868	Acromyrmex_echinatior	RNA-Seq	cDNA	TRANSCRIPTOMIC					heads	NA
SRR1015516		3352805820	2252	PAIRED	SAMN02380868	Acromyrmex_echinatior	RNA-Seq	cDNA	TRANSCRIPTOMIC					heads	NA
SRR1015517		3409745940	2295	PAIRED	SAMN02380868	Acromyrmex_echinatior	RNA-Seq	cDNA	TRANSCRIPTOMIC					heads	NA
SRR1015519		3772546380	2504	PAIRED	SAMN02380859	Acromyrmex_echinatior	RNA-Seq	cDNA	TRANSCRIPTOMIC					heads	NA
SRR1015520		3209677920	2160	PAIRED	SAMN02380859	Acromyrmex_echinatior	RNA-Seq	cDNA	TRANSCRIPTOMIC					heads	NA
SRR1015521		3260524860	2198	PAIRED	SAMN02380859	Acromyrmex_echinatior	RNA-Seq	cDNA	TRANSCRIPTOMIC					heads	NA
SRR1015523		4382488260	2899	PAIRED	SAMN02380867	Acromyrmex_echinatior	RNA-Seq	cDNA	TRANSCRIPTOMIC					heads	NA
SRR1015524		3845307780	2587	PAIRED	SAMN02380867	Acromyrmex_echinatior	RNA-Seq	cDNA	TRANSCRIPTOMIC					heads	NA
SRR1015525		3905563320	2624	PAIRED	SAMN02380867	Acromyrmex_echinatior	RNA-Seq	cDNA	TRANSCRIPTOMIC					heads	NA
SRR1015527		4174914420	2762	PAIRED	SAMN02380864	Acromyrmex_echinatior	RNA-Seq	cDNA	TRANSCRIPTOMIC					heads	NA
SRR1015528		3118413240	2124	PAIRED	SAMN02380864	Acromyrmex_echinatior	RNA-Seq	cDNA	TRANSCRIPTOMIC					heads	NA
SRR1015529		3736742040	2506	PAIRED	SAMN02380864	Acromyrmex_echinatior	RNA-Seq	cDNA	TRANSCRIPTOMIC					heads	NA
SRR1015531		4037543460	2669	PAIRED	SAMN02380865	Acromyrmex_echinatior	RNA-Seq	cDNA	TRANSCRIPTOMIC					heads	NA
SRR1015532		3085137000	2102	PAIRED	SAMN02380865	Acromyrmex_echinatior	RNA-Seq	cDNA	TRANSCRIPTOMIC					heads	NA
SRR1015533		3698257320	2485	PAIRED	SAMN02380865	Acromyrmex_echinatior	RNA-Seq	cDNA	TRANSCRIPTOMIC					heads	NA
SRR7772545	https://www.ncbi.nlm.nih.gov/genome/3519?genome_assembly_id=34551	19355037356	6079	PAIRED	SAMN09939835	Acromyrmex_echinatior	RNA-Seq	PolyA	TRANSCRIPTOMIC	female				brain	NA
SRR7772552	https://www.ncbi.nlm.nih.gov/genome/3519?genome_assembly_id=34551	36052363698	13970	PAIRED	SAMN09939844	Acromyrmex_echinatior	RNA-Seq	PolyA	TRANSCRIPTOMIC	female				brain	NA
SRR7772555	https://www.ncbi.nlm.nih.gov/genome/3519?genome_assembly_id=34551	12948129562	4795	PAIRED	SAMN09939845	Acromyrmex_echinatior	RNA-Seq	PolyA	TRANSCRIPTOMIC	female				brain	NA
SRR7772556	https://www.ncbi.nlm.nih.gov/genome/3519?genome_assembly_id=34551	28932809443	10282	PAIRED	SAMN09939846	Acromyrmex_echinatior	RNA-Seq	PolyA	TRANSCRIPTOMIC	female				brain	NA
SRR7772553	https://www.ncbi.nlm.nih.gov/genome/3519?genome_assembly_id=34551	40904924745	14323	PAIRED	SAMN09939847	Acromyrmex_echinatior	RNA-Seq	PolyA	TRANSCRIPTOMIC	female				brain	NA
SRR7772554	https://www.ncbi.nlm.nih.gov/genome/3519?genome_assembly_id=34551	17362737093	6462	PAIRED	SAMN09939848	Acromyrmex_echinatior	RNA-Seq	PolyA	TRANSCRIPTOMIC	female				brain	NA
SRR7772559	https://www.ncbi.nlm.nih.gov/genome/3519?genome_assembly_id=34551	11813922957	4902	PAIRED	SAMN09939849	Acromyrmex_echinatior	RNA-Seq	PolyA	TRANSCRIPTOMIC	female				brain	NA
SRR7772546	https://www.ncbi.nlm.nih.gov/genome/3519?genome_assembly_id=34551	14529776591	5080	PAIRED	SAMN09939836	Acromyrmex_echinatior	RNA-Seq	PolyA	TRANSCRIPTOMIC	female				brain	NA
SRR7772543	https://www.ncbi.nlm.nih.gov/genome/3519?genome_assembly_id=34551	27116693230	9772	PAIRED	SAMN09939837	Acromyrmex_echinatior	RNA-Seq	PolyA	TRANSCRIPTOMIC	female				brain	NA
SRR7772544	https://www.ncbi.nlm.nih.gov/genome/3519?genome_assembly_id=34551	12496502487	4797	PAIRED	SAMN09939838	Acromyrmex_echinatior	RNA-Seq	PolyA	TRANSCRIPTOMIC	female				brain	NA
SRR7772549	https://www.ncbi.nlm.nih.gov/genome/3519?genome_assembly_id=34551	18972711947	6071	PAIRED	SAMN09939839	Acromyrmex_echinatior	RNA-Seq	PolyA	TRANSCRIPTOMIC	female				brain	NA
SRR7772550	https://www.ncbi.nlm.nih.gov/genome/3519?genome_assembly_id=34551	12494841686	4906	PAIRED	SAMN09939840	Acromyrmex_echinatior	RNA-Seq	PolyA	TRANSCRIPTOMIC	female				brain	NA
SRR7772547	https://www.ncbi.nlm.nih.gov/genome/3519?genome_assembly_id=34551	12423318602	5158	PAIRED	SAMN09939841	Acromyrmex_echinatior	RNA-Seq	PolyA	TRANSCRIPTOMIC	female				brain	NA
SRR7772548	https://www.ncbi.nlm.nih.gov/genome/3519?genome_assembly_id=34551	13002881141	5131	PAIRED	SAMN09939842	Acromyrmex_echinatior	RNA-Seq	PolyA	TRANSCRIPTOMIC	female				brain	NA
SRR7772551	https://www.ncbi.nlm.nih.gov/genome/3519?genome_assembly_id=34551	14174313512	5451	PAIRED	SAMN09939843	Acromyrmex_echinatior	RNA-Seq	PolyA	TRANSCRIPTOMIC	female				brain	NA
ERR034191		9134449020	6114	PAIRED	SAMEA762111	Acromyrmex_echinatior	RNA-Seq	RANDOM	TRANSCRIPTOMIC					cell line	NA
ERR202908		1181733660	717	PAIRED	SAMEA1695846	Acromyrmex_echinatior	RNA-Seq	cDNA	TRANSCRIPTOMIC					NA	NA
ERR202899		1220278320	756	PAIRED	SAMEA1695847	Acromyrmex_echinatior	RNA-Seq	cDNA	TRANSCRIPTOMIC					NA	NA
ERR202909		1163890260	686	PAIRED	SAMEA1695848	Acromyrmex_echinatior	RNA-Seq	cDNA	TRANSCRIPTOMIC					NA	NA
ERR202900		1168673940	724	PAIRED	SAMEA1695849	Acromyrmex_echinatior	RNA-Seq	cDNA	TRANSCRIPTOMIC					NA	NA
ERR202905		1185139620	697	PAIRED	SAMEA1695850	Acromyrmex_echinatior	RNA-Seq	cDNA	TRANSCRIPTOMIC					NA	NA
ERR202906		1208409120	709	PAIRED	SAMEA1695851	Acromyrmex_echinatior	RNA-Seq	cDNA	TRANSCRIPTOMIC					NA	NA
ERR202901		1177164720	733	PAIRED	SAMEA1695852	Acromyrmex_echinatior	RNA-Seq	cDNA	TRANSCRIPTOMIC					NA	NA
ERR202898		1215414900	751	PAIRED	SAMEA1695853	Acromyrmex_echinatior	RNA-Seq	cDNA	TRANSCRIPTOMIC					NA	NA
ERR202902		1231198560	769	PAIRED	SAMEA1695854	Acromyrmex_echinatior	RNA-Seq	cDNA	TRANSCRIPTOMIC					NA	NA
ERR202904		1240282800	774	PAIRED	SAMEA1695855	Acromyrmex_echinatior	RNA-Seq	cDNA	TRANSCRIPTOMIC					NA	NA
ERR202910		1176187680	693	PAIRED	SAMEA1695856	Acromyrmex_echinatior	RNA-Seq	cDNA	TRANSCRIPTOMIC					NA	NA
ERR202907		1177709040	714	PAIRED	SAMEA1695857	Acromyrmex_echinatior	RNA-Seq	cDNA	TRANSCRIPTOMIC					NA	NA
ERR202903		1169410680	726	PAIRED	SAMEA1695858	Acromyrmex_echinatior	RNA-Seq	cDNA	TRANSCRIPTOMIC					NA	NA
ERR202911		1161575820	683	PAIRED	SAMEA1695859	Acromyrmex_echinatior	RNA-Seq	cDNA	TRANSCRIPTOMIC					NA	NA
ERR202912		1164426660	687	PAIRED	SAMEA1695860	Acromyrmex_echinatior	RNA-Seq	cDNA	TRANSCRIPTOMIC					NA	NA
SRR2000538		2395684200	1483	PAIRED	SAMN03460192	Anoplophora_glabripennis	RNA-Seq	cDNA	TRANSCRIPTOMIC	not applicable				midgut	larva
SRR2000539		2875249860	1784	PAIRED	SAMN03460193	Anoplophora_glabripennis	RNA-Seq	cDNA	TRANSCRIPTOMIC	not applicable				midgut	larva
SRR2000540		2244963000	1391	PAIRED	SAMN03460194	Anoplophora_glabripennis	RNA-Seq	cDNA	TRANSCRIPTOMIC	not applicable				midgut	larva
SRR2000541		1498558320	941	PAIRED	SAMN03460195	Anoplophora_glabripennis	RNA-Seq	cDNA	TRANSCRIPTOMIC	not applicable				midgut	larva
SRR2000542		2943839010	1847	PAIRED	SAMN03460196	Anoplophora_glabripennis	RNA-Seq	cDNA	TRANSCRIPTOMIC	not applicable				midgut	larva
SRR5867417		1996751820	1194	SINGLE	SAMN07414784	Anoplophora_glabripennis	RNA-Seq	RANDOM	TRANSCRIPTOMIC					Gut	larval
SRR5867418		1400959245	829	SINGLE	SAMN07414785	Anoplophora_glabripennis	RNA-Seq	RANDOM	TRANSCRIPTOMIC					Gut	larval
SRR5867419		1377537420	826	SINGLE	SAMN07414786	Anoplophora_glabripennis	RNA-Seq	RANDOM	TRANSCRIPTOMIC					Gut	larval
SRR5867420		1503091065	896	SINGLE	SAMN07414787	Anoplophora_glabripennis	RNA-Seq	RANDOM	TRANSCRIPTOMIC					Gut	larval
SRR5867421		2062582305	1227	SINGLE	SAMN07414788	Anoplophora_glabripennis	RNA-Seq	RANDOM	TRANSCRIPTOMIC					Gut	larval
SRR5867422		1576554315	949	SINGLE	SAMN07414789	Anoplophora_glabripennis	RNA-Seq	RANDOM	TRANSCRIPTOMIC					Gut	larval
SRR5867423		1362826710	813	SINGLE	SAMN07414790	Anoplophora_glabripennis	RNA-Seq	RANDOM	TRANSCRIPTOMIC					Gut	larval
SRR5867424		1694005110	1023	SINGLE	SAMN07414791	Anoplophora_glabripennis	RNA-Seq	RANDOM	TRANSCRIPTOMIC					Gut	larval
SRR5867415		1244439315	750	SINGLE	SAMN07414792	Anoplophora_glabripennis	RNA-Seq	RANDOM	TRANSCRIPTOMIC					Gut	larval
SRR5867416		2037365505	1228	SINGLE	SAMN07414793	Anoplophora_glabripennis	RNA-Seq	RANDOM	TRANSCRIPTOMIC					Gut	larval
SRR2682325		6668781540	4190	PAIRED	SAMN04192329	Anoplophora_glabripennis	RNA-Seq	cDNA	TRANSCRIPTOMIC	missing				antenna	NA
SRR1799851		6068372294	4059	PAIRED	SAMN03339737	Anoplophora_glabripennis	RNA-Seq	cDNA	TRANSCRIPTOMIC	female				whole organism	adult
SRR1799852		6719579490	4552	PAIRED	SAMN03339738	Anoplophora_glabripennis	RNA-Seq	cDNA	TRANSCRIPTOMIC	male				whole organism	adult
SRR1290861		17468631600	10180	PAIRED	SAMN02782214	Anoplophora_glabripennis	RNA-Seq	PolyA	TRANSCRIPTOMIC	not determined				Whole insect	NA
SRR1292125		17468631600	10180	PAIRED	SAMN02782214	Anoplophora_glabripennis	RNA-Seq	PolyA	TRANSCRIPTOMIC	not determined				Whole insect	NA
SRR827491		62532600	143	SINGLE	SAMN02028621	Anoplophora_glabripennis	EST	RANDOM	TRANSCRIPTOMIC					NA	NA
SRR2000521		3021143160	1868	PAIRED	SAMN03460189	Anoplophora_glabripennis	RNA-Seq	cDNA	TRANSCRIPTOMIC	not applicable				midgut	larva
SRR2000536		3016659240	1864	PAIRED	SAMN03460190	Anoplophora_glabripennis	RNA-Seq	cDNA	TRANSCRIPTOMIC	not applicable				midgut	larva
SRR2000537		3049680690	1967	PAIRED	SAMN03460191	Anoplophora_glabripennis	RNA-Seq	cDNA	TRANSCRIPTOMIC	not applicable				midgut	larva
SRR1986051		1510571580	920	SINGLE	SAMN03497776	Anoplophora_glabripennis	RNA-Seq	cDNA	TRANSCRIPTOMIC					midgut	larvae
SRR1986052		1508329620	919	SINGLE	SAMN03497777	Anoplophora_glabripennis	RNA-Seq	cDNA	TRANSCRIPTOMIC					midgut	larvae
SRR1986053		1266531210	816	SINGLE	SAMN03497778	Anoplophora_glabripennis	RNA-Seq	cDNA	TRANSCRIPTOMIC					midgut	larvae
SRR1986054		1197842100	731	SINGLE	SAMN03497779	Anoplophora_glabripennis	RNA-Seq	cDNA	TRANSCRIPTOMIC					midgut	larvae
SRR1986055		1437624930	874	SINGLE	SAMN03497780	Anoplophora_glabripennis	RNA-Seq	cDNA	TRANSCRIPTOMIC					midgut	larvae
SRR1986056		1122481500	693	SINGLE	SAMN03497781	Anoplophora_glabripennis	RNA-Seq	cDNA	TRANSCRIPTOMIC					midgut	larvae
SRR1986057		749279160	465	SINGLE	SAMN03497782	Anoplophora_glabripennis	RNA-Seq	cDNA	TRANSCRIPTOMIC					midgut	larvae
SRR1986058		1471919505	915	SINGLE	SAMN03497905	Anoplophora_glabripennis	RNA-Seq	cDNA	TRANSCRIPTOMIC					midgut	larvae
SRR827514		26522412746	16185	PAIRED	SAMN02028622	Anoplophora_glabripennis	RNA-Seq	RANDOM	TRANSCRIPTOMIC					NA	NA
SRR1503155		2910592200	1893	PAIRED	SAMN02870214	Aphidius_colemani	EST	cDNA	TRANSCRIPTOMIC	missing				whole organism	adult
SRR9034696		26187522900	9719	PAIRED	SAMN11609829	Apis_dorsata	RNA-Seq	cDNA	TRANSCRIPTOMIC					whole body without belly	NA
SRR10501692		8460831900	2669	PAIRED	SAMN13339006	Apis_cerana	RNA-Seq	size fractionation	TRANSCRIPTOMIC	female				heads	adult
SRR10501693		7556778000	2398	PAIRED	SAMN13339006	Apis_cerana	RNA-Seq	size fractionation	TRANSCRIPTOMIC	female				heads	adult
SRR10501694		8940188700	3120	PAIRED	SAMN13339006	Apis_cerana	RNA-Seq	size fractionation	TRANSCRIPTOMIC	female				heads	adult
SRR10501695		8541381600	2734	PAIRED	SAMN13339006	Apis_cerana	RNA-Seq	size fractionation	TRANSCRIPTOMIC	female				heads	adult
SRR10501696		8449875900	2682	PAIRED	SAMN13339006	Apis_cerana	RNA-Seq	size fractionation	TRANSCRIPTOMIC	female				heads	adult
SRR10501697		8457556200	2652	PAIRED	SAMN13339006	Apis_cerana	RNA-Seq	size fractionation	TRANSCRIPTOMIC	female				heads	adult
SRR10501698		8661064800	2781	PAIRED	SAMN13339006	Apis_cerana	RNA-Seq	size fractionation	TRANSCRIPTOMIC	female				heads	adult
SRR10501699		8529786900	2675	PAIRED	SAMN13339006	Apis_cerana	RNA-Seq	size fractionation	TRANSCRIPTOMIC	female				heads	adult
SRR10501700		7640481000	2383	PAIRED	SAMN13339006	Apis_cerana	RNA-Seq	size fractionation	TRANSCRIPTOMIC	female				heads	adult
SRR7741648		566444150	178	SINGLE	SAMN09874045	Apis_cerana	miRNA-Seq	PCR	TRANSCRIPTOMIC					midgut	midgut samples from Apis cerana cerana 7-day-old worker without treanment
SRR7741647		858095550	270	SINGLE	SAMN09874046	Apis_cerana	miRNA-Seq	PCR	TRANSCRIPTOMIC					midgut	midgut samples from Apis cerana cerana 10-day-old worker without treanment
SRR7741652		560695300	173	SINGLE	SAMN09874037	Apis_cerana	miRNA-Seq	PCR	TRANSCRIPTOMIC					midgut	midgut samples from Apis cerana cerana worker 7d post infection with N. ceranae
SRR7741651		727462250	230	SINGLE	SAMN09874038	Apis_cerana	miRNA-Seq	PCR	TRANSCRIPTOMIC					midgut	midgut samples from Apis cerana cerana worker 7d post infection with N. ceranae
SRR7741650		551488350	173	SINGLE	SAMN09874039	Apis_cerana	miRNA-Seq	PCR	TRANSCRIPTOMIC					midgut	midgut samples from Apis cerana cerana worker 7d post infection with N. ceranae
SRR7741649		663196500	216	SINGLE	SAMN09874040	Apis_cerana	miRNA-Seq	PCR	TRANSCRIPTOMIC					midgut	midgut samples from Apis cerana cerana worker 10d post infection with N. ceranae
SRR7741654		637885300	210	SINGLE	SAMN09874043	Apis_cerana	miRNA-Seq	PCR	TRANSCRIPTOMIC					midgut	midgut samples from Apis cerana cerana 7-day-old worker without treanment
SRR7741653		639727150	201	SINGLE	SAMN09874044	Apis_cerana	miRNA-Seq	PCR	TRANSCRIPTOMIC					midgut	midgut samples from Apis cerana cerana 7-day-old worker without treanment
SRR7741658		583315250	191	SINGLE	SAMN09874047	Apis_cerana	miRNA-Seq	PCR	TRANSCRIPTOMIC					midgut	midgut samples from Apis cerana cerana 10-day-old worker without treanment
SRR7741657		587861150	190	SINGLE	SAMN09874048	Apis_cerana	miRNA-Seq	PCR	TRANSCRIPTOMIC					midgut	midgut samples from Apis cerana cerana 10-day-old worker without treanment
SRR7741656		684404100	226	SINGLE	SAMN09874041	Apis_cerana	miRNA-Seq	PCR	TRANSCRIPTOMIC					midgut	midgut samples from Apis cerana cerana worker 10d post infection with N. ceranae
SRR7741655		646817850	209	SINGLE	SAMN09874042	Apis_cerana	miRNA-Seq	PCR	TRANSCRIPTOMIC					midgut	midgut samples from Apis cerana cerana worker 10d post infection with N. ceranae
SRR6505206		8555921400	3471	PAIRED	SAMN08384702	Apis_cerana	RNA-Seq	RANDOM PCR	TRANSCRIPTOMIC					Embryo	NA
SRR6505209		8651377200	3499	PAIRED	SAMN08384752	Apis_cerana	RNA-Seq	RANDOM PCR	TRANSCRIPTOMIC					Embryo	NA
SRR6505211		8581011300	3440	PAIRED	SAMN08384753	Apis_cerana	RNA-Seq	RANDOM PCR	TRANSCRIPTOMIC					Embryo	NA
SRR6506058		8641739700	3533	PAIRED	SAMN08384754	Apis_cerana	RNA-Seq	RANDOM PCR	TRANSCRIPTOMIC					Embryo	NA
SRR6505782		8687571300	3544	PAIRED	SAMN08384755	Apis_cerana	RNA-Seq	RANDOM PCR	TRANSCRIPTOMIC					Embryo	NA
SRR6505783		8626868700	3487	PAIRED	SAMN08384756	Apis_cerana	RNA-Seq	RANDOM PCR	TRANSCRIPTOMIC					Embryo	NA
SRR6505785		8532973500	3478	PAIRED	SAMN08384757	Apis_cerana	RNA-Seq	RANDOM PCR	TRANSCRIPTOMIC					Embryo	NA
SRR6505784		8532946500	3471	PAIRED	SAMN08384758	Apis_cerana	RNA-Seq	RANDOM PCR	TRANSCRIPTOMIC					Embryo	NA
SRR6506157		8497577100	3445	PAIRED	SAMN08384759	Apis_cerana	RNA-Seq	RANDOM PCR	TRANSCRIPTOMIC					Embryo	NA
SRR7339935		16982373310	7192	PAIRED	SAMN09404766	Apis_cerana	RNA-Seq	RANDOM	TRANSCRIPTOMIC					whole organism	NA
SRR4096528		59666605085	33599	PAIRED	SAMN05712688	Apis_mellifera	RNA-Seq	cDNA	TRANSCRIPTOMIC	not determined				unknow	not determined
SRR1380976		2901432656	1816	PAIRED	SAMN05199459	Apis_cerana	RNA-Seq	PolyA	TRANSCRIPTOMIC					antennae	NA
SRR1388774		12587287206	8486	PAIRED	SAMN05199461	Apis_cerana	RNA-Seq	PolyA	TRANSCRIPTOMIC					fat body	NA
SRR1380984		5301474446	3557	PAIRED	SAMN05199462	Apis_cerana	RNA-Seq	PolyA	TRANSCRIPTOMIC					gut	NA
SRR1408614		169530070	113	SINGLE	SAMN05199463	Apis_cerana	RNA-Seq	PolyA	TRANSCRIPTOMIC					head	NA
SRR1380979		2842498550	1789	PAIRED	SAMN05199464	Apis_cerana	RNA-Seq	PolyA	TRANSCRIPTOMIC					hypopharyngeal gland	NA
SRR1406762		17772986362	12019	PAIRED	SAMN05199465	Apis_cerana	RNA-Seq	PolyA	TRANSCRIPTOMIC					venom gland	NA
SRR4051855		56756823945	34537	PAIRED	SAMN05592186	Apis_mellifera	RNA-Seq	cDNA	TRANSCRIPTOMIC	not determined				larvae body	larvae
SRR1408090		2624152306	1669	PAIRED	SAMN05199466	Apis_mellifera	RNA-Seq	PolyA	TRANSCRIPTOMIC					antennae	NA
SRR1386316		2755889636	1743	PAIRED	SAMN05199467	Apis_mellifera	RNA-Seq	PolyA	TRANSCRIPTOMIC					brain	NA
SRR1407793		2820128464	1816	PAIRED	SAMN05199468	Apis_mellifera	RNA-Seq	PolyA	TRANSCRIPTOMIC					hypopharyngeal gland	NA
SRR4067782		66623629474	39104	PAIRED	SAMN05601678	Apis_cerana	RNA-Seq	cDNA	TRANSCRIPTOMIC	not determined				larvae body	larvae
SRR4051820		3355144945	2026	PAIRED	SAMN05601678	Apis_cerana	RNA-Seq	cDNA	TRANSCRIPTOMIC	not determined				larvae body	larvae
SRR1380970		2834834872	1775	PAIRED	SAMN05199460	Apis_cerana	RNA-Seq	PolyA	TRANSCRIPTOMIC					brain	NA
SRR1653580		7867748096	4858	PAIRED	SAMN02592885	Apis_cerana	RNA-Seq	unspecified	TRANSCRIPTOMIC					NA	NA
SRR1653592		4985757940	3271	PAIRED	SAMN02592885	Apis_cerana	RNA-Seq	unspecified	TRANSCRIPTOMIC					NA	NA
SRR1653605		5143639726	3370	PAIRED	SAMN02592885	Apis_cerana	RNA-Seq	unspecified	TRANSCRIPTOMIC					NA	NA
SRR1036357		588000000	369	SINGLE	SAMN02414606	Apis_cerana	RNA-Seq	size fractionation	TRANSCRIPTOMIC					hypopharyngeal gland	NA
SRR1036358		588000000	353	SINGLE	SAMN02414604	Apis_cerana	RNA-Seq	size fractionation	TRANSCRIPTOMIC					hypopharyngeal gland	NA
SRR1036359		588000000	354	SINGLE	SAMN02414605	Apis_cerana	RNA-Seq	size fractionation	TRANSCRIPTOMIC					hypopharyngeal gland	NA
SRR1914350		4557529620	3080	PAIRED	SAMN03401145	Apis_cerana	RNA-Seq	size fractionation	TRANSCRIPTOMIC	male			whole body without alimentary canal	whole body without alimentary canal	adult
SRR849283		4442277780	2734	PAIRED	SAMN02117328	Apis_mellifera	RNA-Seq	size fractionation	TRANSCRIPTOMIC	female				NA	Adult
SRR098291		77912455	179	SINGLE	SAMN00205597	Apis_florea	EST	cDNA	TRANSCRIPTOMIC					NA	NA
SRR098292		17807079	39	SINGLE	SAMN00205597	Apis_florea	EST	cDNA	TRANSCRIPTOMIC					NA	NA
SRR3657423		7522033892	3789	PAIRED	SAMN05225359	Apis_florea	RNA-Seq	cDNA	TRANSCRIPTOMIC	male				antennae	NA
SRR3657424		7313547368	3712	PAIRED	SAMN05225360	Apis_florea	RNA-Seq	cDNA	TRANSCRIPTOMIC	male				antennae	NA
SRR3657425		9094529404	4768	PAIRED	SAMN05225361	Apis_florea	RNA-Seq	cDNA	TRANSCRIPTOMIC	female				antennae	NA
SRR3657426		6166468630	3241	PAIRED	SAMN05225362	Apis_florea	RNA-Seq	cDNA	TRANSCRIPTOMIC	female				antennae	NA
SRR12031953		6482806246	1983	PAIRED	SAMN15241853	Apis_mellifera	RNA-Seq	RT-PCR	TRANSCRIPTOMIC					total body	NA
SRR12031954		6221631900	1916	PAIRED	SAMN15241853	Apis_mellifera	RNA-Seq	RT-PCR	TRANSCRIPTOMIC					total body	NA
SRR12031961		6678225756	2046	PAIRED	SAMN15241853	Apis_mellifera	RNA-Seq	RT-PCR	TRANSCRIPTOMIC					total body	NA
SRR12031962		7524497892	2286	PAIRED	SAMN15241853	Apis_mellifera	RNA-Seq	RT-PCR	TRANSCRIPTOMIC					total body	NA
SRR12031963		6382682860	1969	PAIRED	SAMN15241853	Apis_mellifera	RNA-Seq	RT-PCR	TRANSCRIPTOMIC					total body	NA
SRR12031964		7425159018	2261	PAIRED	SAMN15241853	Apis_mellifera	RNA-Seq	RT-PCR	TRANSCRIPTOMIC					total body	NA
SRR12031965		8806703308	2671	PAIRED	SAMN15241853	Apis_mellifera	RNA-Seq	RT-PCR	TRANSCRIPTOMIC					total body	NA
SRR12031966		7701825646	2375	PAIRED	SAMN15241853	Apis_mellifera	RNA-Seq	RT-PCR	TRANSCRIPTOMIC					total body	NA
SRR12031967		6172061994	1909	PAIRED	SAMN15241853	Apis_mellifera	RNA-Seq	RT-PCR	TRANSCRIPTOMIC					total body	NA
SRR12031968		6835734404	2091	PAIRED	SAMN15241853	Apis_mellifera	RNA-Seq	RT-PCR	TRANSCRIPTOMIC					total body	NA
SRR12031969		14565451114	4412	PAIRED	SAMN15241852	Apis_mellifera	RNA-Seq	RT-PCR	TRANSCRIPTOMIC					total body	NA
SRR12031970		8692666868	2615	PAIRED	SAMN15241852	Apis_mellifera	RNA-Seq	RT-PCR	TRANSCRIPTOMIC					total body	NA
SRR12031955		6650214588	2082	PAIRED	SAMN15241852	Apis_mellifera	RNA-Seq	RT-PCR	TRANSCRIPTOMIC					total body	NA
SRR12031956		11067997052	3325	PAIRED	SAMN15241852	Apis_mellifera	RNA-Seq	RT-PCR	TRANSCRIPTOMIC					total body	NA
SRR12031957		9412819028	2874	PAIRED	SAMN15241852	Apis_mellifera	RNA-Seq	RT-PCR	TRANSCRIPTOMIC					total body	NA
SRR12031958		11848839090	3579	PAIRED	SAMN15241852	Apis_mellifera	RNA-Seq	RT-PCR	TRANSCRIPTOMIC					total body	NA
SRR12031959		11049988418	3342	PAIRED	SAMN15241852	Apis_mellifera	RNA-Seq	RT-PCR	TRANSCRIPTOMIC					total body	NA
SRR12031960		10377488938	3127	PAIRED	SAMN15241852	Apis_mellifera	RNA-Seq	RT-PCR	TRANSCRIPTOMIC					total body	NA
SRR11940309		20632054791	6675	PAIRED	SAMN15086233	Apis_mellifera	RNA-Seq	PCR	TRANSCRIPTOMIC	male				tissue sample	L5F1
ERR3632874		1446565800	516	PAIRED	SAMEA6141203	Apis_mellifera	RNA-Seq	PolyA	TRANSCRIPTOMIC	male				NA	NA
ERR3632875		1110637200	374	PAIRED	SAMEA6141204	Apis_mellifera	RNA-Seq	PolyA	TRANSCRIPTOMIC	male				NA	NA
ERR3632876		1632178350	559	PAIRED	SAMEA6141205	Apis_mellifera	RNA-Seq	PolyA	TRANSCRIPTOMIC	male				NA	NA
ERR3632877		1398542400	472	PAIRED	SAMEA6141206	Apis_mellifera	RNA-Seq	PolyA	TRANSCRIPTOMIC	male				NA	NA
ERR3632878		1069371600	372	PAIRED	SAMEA6141207	Apis_mellifera	RNA-Seq	PolyA	TRANSCRIPTOMIC	male				NA	NA
ERR3632879		1348550400	462	PAIRED	SAMEA6141208	Apis_mellifera	RNA-Seq	PolyA	TRANSCRIPTOMIC	male				NA	NA
ERR3632880		1482182550	505	PAIRED	SAMEA6141209	Apis_mellifera	RNA-Seq	PolyA	TRANSCRIPTOMIC	female				NA	NA
ERR3632881		1224479550	418	PAIRED	SAMEA6141210	Apis_mellifera	RNA-Seq	PolyA	TRANSCRIPTOMIC	female				NA	NA
ERR3632882		1238743500	427	PAIRED	SAMEA6141211	Apis_mellifera	RNA-Seq	PolyA	TRANSCRIPTOMIC	female				NA	NA
ERR3632883		1751160000	598	PAIRED	SAMEA6141212	Apis_mellifera	RNA-Seq	PolyA	TRANSCRIPTOMIC	female				NA	NA
ERR3632884		1614297600	560	PAIRED	SAMEA6141213	Apis_mellifera	RNA-Seq	PolyA	TRANSCRIPTOMIC	female				NA	NA
ERR3632885		1370716350	457	PAIRED	SAMEA6141214	Apis_mellifera	RNA-Seq	PolyA	TRANSCRIPTOMIC	female				NA	NA
ERR3632886		1208882250	422	PAIRED	SAMEA6141215	Apis_mellifera	RNA-Seq	PolyA	TRANSCRIPTOMIC	female				NA	NA
ERR3632887		1140852300	379	PAIRED	SAMEA6141216	Apis_mellifera	RNA-Seq	PolyA	TRANSCRIPTOMIC	female				NA	NA
SRR11940310		21477686494	6795	PAIRED	SAMN15086232	Apis_mellifera	RNA-Seq	PCR	TRANSCRIPTOMIC	female				tissue sample	L5F1
SRR11940311		21859093979	6870	PAIRED	SAMN15086231	Apis_mellifera	RNA-Seq	PCR	TRANSCRIPTOMIC	female				tissue sample	L5F1
SRR11671127		8354374600	5701	PAIRED	SAMN14820476	Apis_mellifera	RNA-Seq	RANDOM	TRANSCRIPTOMIC	female				whole body	adult
SRR11671128		8047586752	5503	PAIRED	SAMN14820476	Apis_mellifera	RNA-Seq	RANDOM	TRANSCRIPTOMIC	female				whole body	adult
SRR11671129		9982966310	6845	PAIRED	SAMN14820476	Apis_mellifera	RNA-Seq	RANDOM	TRANSCRIPTOMIC	female				whole body	adult
SRR11671130		8945260436	6144	PAIRED	SAMN14820476	Apis_mellifera	RNA-Seq	RANDOM	TRANSCRIPTOMIC	female				whole body	adult
SRR11671131		7524679800	5165	PAIRED	SAMN14820476	Apis_mellifera	RNA-Seq	RANDOM	TRANSCRIPTOMIC	female				whole body	adult
SRR11671132		8627877114	5907	PAIRED	SAMN14820476	Apis_mellifera	RNA-Seq	RANDOM	TRANSCRIPTOMIC	female				whole body	adult
SRR11671133		7260152854	4960	PAIRED	SAMN14820476	Apis_mellifera	RNA-Seq	RANDOM	TRANSCRIPTOMIC	female				whole body	adult
SRR11671134		9530411404	6523	PAIRED	SAMN14820476	Apis_mellifera	RNA-Seq	RANDOM	TRANSCRIPTOMIC	female				whole body	adult
SRR11349374		10148950285	4613	PAIRED	SAMN14403342	Apis_mellifera	RNA-Seq	RT-PCR	TRANSCRIPTOMIC					venom gland	NA
SRR10393072		7645626000	4739	PAIRED	SAMN13192295	Apis_mellifera	RNA-Seq	PolyA	TRANSCRIPTOMIC					Hindgut	NA
SRR10393071		7800697200	4809	PAIRED	SAMN13192296	Apis_mellifera	RNA-Seq	PolyA	TRANSCRIPTOMIC					Hindgut	NA
SRR10393070		9308397600	5762	PAIRED	SAMN13192297	Apis_mellifera	RNA-Seq	PolyA	TRANSCRIPTOMIC					Hindgut	NA
SRR10393069		8858262900	5476	PAIRED	SAMN13192298	Apis_mellifera	RNA-Seq	PolyA	TRANSCRIPTOMIC					Hindgut	NA
SRR10393096		9498181500	5854	PAIRED	SAMN13192299	Apis_mellifera	RNA-Seq	PolyA	TRANSCRIPTOMIC					Hindgut	NA
SRR10393095		9303340500	5703	PAIRED	SAMN13192300	Apis_mellifera	RNA-Seq	PolyA	TRANSCRIPTOMIC					Hindgut	NA
SRR10393094		10086038700	6201	PAIRED	SAMN13192301	Apis_mellifera	RNA-Seq	PolyA	TRANSCRIPTOMIC					Hindgut	NA
SRR10393093		8330609400	5129	PAIRED	SAMN13192302	Apis_mellifera	RNA-Seq	PolyA	TRANSCRIPTOMIC					Hindgut	NA
SRR10393092		9511814700	5840	PAIRED	SAMN13192303	Apis_mellifera	RNA-Seq	PolyA	TRANSCRIPTOMIC					Hindgut	NA
SRR10393091		8462325600	5282	PAIRED	SAMN13192304	Apis_mellifera	RNA-Seq	PolyA	TRANSCRIPTOMIC					Hindgut	NA
SRR10393090		7546209300	4672	PAIRED	SAMN13192305	Apis_mellifera	RNA-Seq	PolyA	TRANSCRIPTOMIC					Hindgut	NA
SRR10393089		8366074800	5233	PAIRED	SAMN13192306	Apis_mellifera	RNA-Seq	PolyA	TRANSCRIPTOMIC					Hindgut	NA
SRR10393088		7694543100	4851	PAIRED	SAMN13192307	Apis_mellifera	RNA-Seq	PolyA	TRANSCRIPTOMIC					Hindgut	NA
SRR10393087		8270672100	5236	PAIRED	SAMN13192308	Apis_mellifera	RNA-Seq	PolyA	TRANSCRIPTOMIC					Hindgut	NA
SRR10393085		7702029600	4816	PAIRED	SAMN13192309	Apis_mellifera	RNA-Seq	PolyA	TRANSCRIPTOMIC					Hindgut	NA
SRR10393084		8330385000	5241	PAIRED	SAMN13192310	Apis_mellifera	RNA-Seq	PolyA	TRANSCRIPTOMIC					Hindgut	NA
SRR10393083		8712792000	5483	PAIRED	SAMN13192311	Apis_mellifera	RNA-Seq	PolyA	TRANSCRIPTOMIC					Hindgut	NA
SRR10393082		7263753000	4584	PAIRED	SAMN13192312	Apis_mellifera	RNA-Seq	PolyA	TRANSCRIPTOMIC					Hindgut	NA
SRR10393086		8730736500	5305	PAIRED	SAMN13192291	Apis_mellifera	RNA-Seq	PolyA	TRANSCRIPTOMIC					Hindgut	NA
SRR10393075		9178969500	5504	PAIRED	SAMN13192292	Apis_mellifera	RNA-Seq	PolyA	TRANSCRIPTOMIC					Hindgut	NA
SRR10393074		8359368300	5089	PAIRED	SAMN13192293	Apis_mellifera	RNA-Seq	PolyA	TRANSCRIPTOMIC					Hindgut	NA
SRR10393073		8256327600	4989	PAIRED	SAMN13192294	Apis_mellifera	RNA-Seq	PolyA	TRANSCRIPTOMIC					Hindgut	NA
SRR10391996		8618822400	5253	PAIRED	SAMN13191198	Apis_mellifera	RNA-Seq	PolyA	TRANSCRIPTOMIC					Hindgut	NA
SRR10391995		8536713300	5204	PAIRED	SAMN13191199	Apis_mellifera	RNA-Seq	PolyA	TRANSCRIPTOMIC					Hindgut	NA
SRR10391994		8281734600	5027	PAIRED	SAMN13191200	Apis_mellifera	RNA-Seq	PolyA	TRANSCRIPTOMIC					Hindgut	NA
SRR10391993		8600031300	5233	PAIRED	SAMN13191201	Apis_mellifera	RNA-Seq	PolyA	TRANSCRIPTOMIC					Hindgut	NA
SRR10392014		8851486500	5383	PAIRED	SAMN13191202	Apis_mellifera	RNA-Seq	PolyA	TRANSCRIPTOMIC					Hindgut	NA
SRR10392013		9015350400	5435	PAIRED	SAMN13191203	Apis_mellifera	RNA-Seq	PolyA	TRANSCRIPTOMIC					Hindgut	NA
SRR10392012		8848242300	5408	PAIRED	SAMN13191204	Apis_mellifera	RNA-Seq	PolyA	TRANSCRIPTOMIC					Hindgut	NA
SRR10392011		8710634100	5313	PAIRED	SAMN13191205	Apis_mellifera	RNA-Seq	PolyA	TRANSCRIPTOMIC					Hindgut	NA
SRR10392010		8162331300	4966	PAIRED	SAMN13191206	Apis_mellifera	RNA-Seq	PolyA	TRANSCRIPTOMIC					Hindgut	NA
SRR10392009		8627579700	5292	PAIRED	SAMN13191207	Apis_mellifera	RNA-Seq	PolyA	TRANSCRIPTOMIC					Hindgut	NA
SRR10392008		7926764400	4867	PAIRED	SAMN13191208	Apis_mellifera	RNA-Seq	PolyA	TRANSCRIPTOMIC					Hindgut	NA
SRR10392007		7742286300	4752	PAIRED	SAMN13191209	Apis_mellifera	RNA-Seq	PolyA	TRANSCRIPTOMIC					Hindgut	NA
SRR10392006		7728096000	4709	PAIRED	SAMN13191210	Apis_mellifera	RNA-Seq	PolyA	TRANSCRIPTOMIC					Hindgut	NA
SRR10392005		7782971100	4739	PAIRED	SAMN13191211	Apis_mellifera	RNA-Seq	PolyA	TRANSCRIPTOMIC					Hindgut	NA
SRR10392003		8341769700	5082	PAIRED	SAMN13191212	Apis_mellifera	RNA-Seq	PolyA	TRANSCRIPTOMIC					Hindgut	NA
SRR10392002		8130048000	4983	PAIRED	SAMN13191213	Apis_mellifera	RNA-Seq	PolyA	TRANSCRIPTOMIC					Hindgut	NA
SRR10392001		8666196300	5275	PAIRED	SAMN13191214	Apis_mellifera	RNA-Seq	PolyA	TRANSCRIPTOMIC					Hindgut	NA
SRR10392000		8101764900	4944	PAIRED	SAMN13191215	Apis_mellifera	RNA-Seq	PolyA	TRANSCRIPTOMIC					Hindgut	NA
SRR10392016		8702353800	5218	PAIRED	SAMN13191192	Apis_mellifera	RNA-Seq	PolyA	TRANSCRIPTOMIC					Hindgut	NA
SRR10392015		9432708000	5625	PAIRED	SAMN13191193	Apis_mellifera	RNA-Seq	PolyA	TRANSCRIPTOMIC					Hindgut	NA
SRR10392004		8218056000	4974	PAIRED	SAMN13191194	Apis_mellifera	RNA-Seq	PolyA	TRANSCRIPTOMIC					Hindgut	NA
SRR10391999		8189009400	4992	PAIRED	SAMN13191195	Apis_mellifera	RNA-Seq	PolyA	TRANSCRIPTOMIC					Hindgut	NA
SRR10391998		7513597800	4615	PAIRED	SAMN13191196	Apis_mellifera	RNA-Seq	PolyA	TRANSCRIPTOMIC					Hindgut	NA
SRR10391997		8060757000	4898	PAIRED	SAMN13191197	Apis_mellifera	RNA-Seq	PolyA	TRANSCRIPTOMIC					Hindgut	NA
SRR10393098		8438565000	5067	PAIRED	SAMN13192289	Apis_mellifera	RNA-Seq	PolyA	TRANSCRIPTOMIC					Hindgut	NA
SRR10393097		8030555700	4821	PAIRED	SAMN13192290	Apis_mellifera	RNA-Seq	PolyA	TRANSCRIPTOMIC					Hindgut	NA
SRR10343221		5051579066	1985	SINGLE	SAMN13110939	Apis_mellifera	RNA-Seq	cDNA	TRANSCRIPTOMIC					midgut	NA
SRR10343222		5051579066	2322	SINGLE	SAMN13110939	Apis_mellifera	RNA-Seq	cDNA	TRANSCRIPTOMIC					midgut	NA
SRR10343223		5469748047	2152	SINGLE	SAMN13110938	Apis_mellifera	RNA-Seq	cDNA	TRANSCRIPTOMIC					midgut	NA
SRR10343224		5469748047	2514	SINGLE	SAMN13110938	Apis_mellifera	RNA-Seq	cDNA	TRANSCRIPTOMIC					midgut	NA
SRR10343225		5191197592	2053	SINGLE	SAMN13110937	Apis_mellifera	RNA-Seq	cDNA	TRANSCRIPTOMIC					midgut	NA
SRR10343226		5191197592	2388	SINGLE	SAMN13110937	Apis_mellifera	RNA-Seq	cDNA	TRANSCRIPTOMIC					midgut	NA
SRR10343227		4854769894	1925	SINGLE	SAMN13110936	Apis_mellifera	RNA-Seq	cDNA	TRANSCRIPTOMIC					midgut	NA
SRR10343228		4854769894	2219	SINGLE	SAMN13110936	Apis_mellifera	RNA-Seq	cDNA	TRANSCRIPTOMIC					midgut	NA
SRR10343229		5024961541	1988	SINGLE	SAMN13110935	Apis_mellifera	RNA-Seq	cDNA	TRANSCRIPTOMIC					midgut	NA
SRR10343230		5024961541	2316	SINGLE	SAMN13110935	Apis_mellifera	RNA-Seq	cDNA	TRANSCRIPTOMIC					midgut	NA
SRR10343231		5080986769	2006	SINGLE	SAMN13110934	Apis_mellifera	RNA-Seq	cDNA	TRANSCRIPTOMIC					midgut	NA
SRR10343232		5080986769	2335	SINGLE	SAMN13110934	Apis_mellifera	RNA-Seq	cDNA	TRANSCRIPTOMIC					midgut	NA
SRR10231776		1252119000	457	PAIRED	SAMN12913107	Apis_mellifera	RNA-Seq	unspecified	TRANSCRIPTOMIC	female				Brain	missing
SRR10231777		653793675	278	SINGLE	SAMN12913110	Apis_mellifera	ncRNA-Seq	unspecified	TRANSCRIPTOMIC	female				Brain	missing
SRR10231770		649417800	273	SINGLE	SAMN12913110	Apis_mellifera	ncRNA-Seq	unspecified	TRANSCRIPTOMIC	female				Brain	missing
SRR10231771		653468175	280	SINGLE	SAMN12913110	Apis_mellifera	ncRNA-Seq	unspecified	TRANSCRIPTOMIC	female				Brain	missing
SRR10231772		637658475	266	SINGLE	SAMN12913110	Apis_mellifera	ncRNA-Seq	unspecified	TRANSCRIPTOMIC	female				Brain	missing
SRR10231773		658975200	276	SINGLE	SAMN12913110	Apis_mellifera	ncRNA-Seq	unspecified	TRANSCRIPTOMIC	female				Brain	missing
SRR10231774		678341550	290	SINGLE	SAMN12913110	Apis_mellifera	ncRNA-Seq	unspecified	TRANSCRIPTOMIC	female				Brain	missing
SRR10231775		676277625	294	SINGLE	SAMN12913110	Apis_mellifera	ncRNA-Seq	unspecified	TRANSCRIPTOMIC	female				Brain	missing
SRR10231799		835241175	349	SINGLE	SAMN12913108	Apis_mellifera	ncRNA-Seq	unspecified	TRANSCRIPTOMIC	female				Brain	missing
SRR10231800		852832275	356	SINGLE	SAMN12913108	Apis_mellifera	ncRNA-Seq	unspecified	TRANSCRIPTOMIC	female				Brain	missing
SRR10231801		729030375	303	SINGLE	SAMN12913108	Apis_mellifera	ncRNA-Seq	unspecified	TRANSCRIPTOMIC	female				Brain	missing
SRR10231802		724633275	307	SINGLE	SAMN12913108	Apis_mellifera	ncRNA-Seq	unspecified	TRANSCRIPTOMIC	female				Brain	missing
SRR10231803		714579300	295	SINGLE	SAMN12913108	Apis_mellifera	ncRNA-Seq	unspecified	TRANSCRIPTOMIC	female				Brain	missing
SRR10231804		731707275	303	SINGLE	SAMN12913108	Apis_mellifera	ncRNA-Seq	unspecified	TRANSCRIPTOMIC	female				Brain	missing
SRR10231805		703176000	294	SINGLE	SAMN12913108	Apis_mellifera	ncRNA-Seq	unspecified	TRANSCRIPTOMIC	female				Brain	missing
SRR10231806		701157675	298	SINGLE	SAMN12913108	Apis_mellifera	ncRNA-Seq	unspecified	TRANSCRIPTOMIC	female				Brain	missing
SRR10231807		686916300	286	SINGLE	SAMN12913108	Apis_mellifera	ncRNA-Seq	unspecified	TRANSCRIPTOMIC	female				Brain	missing
SRR10231808		711343650	296	SINGLE	SAMN12913108	Apis_mellifera	ncRNA-Seq	unspecified	TRANSCRIPTOMIC	female				Brain	missing
SRR10231796		850986300	357	SINGLE	SAMN12913108	Apis_mellifera	ncRNA-Seq	unspecified	TRANSCRIPTOMIC	female				Brain	missing
SRR10231797		846789825	362	SINGLE	SAMN12913108	Apis_mellifera	ncRNA-Seq	unspecified	TRANSCRIPTOMIC	female				Brain	missing
SRR10231836		1558799550	576	PAIRED	SAMN12913109	Apis_mellifera	RNA-Seq	unspecified	TRANSCRIPTOMIC	female				Brain	missing
SRR10231837		1619925900	601	PAIRED	SAMN12913109	Apis_mellifera	RNA-Seq	unspecified	TRANSCRIPTOMIC	female				Brain	missing
SRR10231783		606350475	256	SINGLE	SAMN12913109	Apis_mellifera	ncRNA-Seq	unspecified	TRANSCRIPTOMIC	female				Brain	missing
SRR10231784		604902150	260	SINGLE	SAMN12913109	Apis_mellifera	ncRNA-Seq	unspecified	TRANSCRIPTOMIC	female				Brain	missing
SRR10231785		589096725	247	SINGLE	SAMN12913109	Apis_mellifera	ncRNA-Seq	unspecified	TRANSCRIPTOMIC	female				Brain	missing
SRR10231786		606068850	254	SINGLE	SAMN12913109	Apis_mellifera	ncRNA-Seq	unspecified	TRANSCRIPTOMIC	female				Brain	missing
SRR10231788		717954150	302	SINGLE	SAMN12913109	Apis_mellifera	ncRNA-Seq	unspecified	TRANSCRIPTOMIC	female				Brain	missing
SRR10231789		713908350	306	SINGLE	SAMN12913109	Apis_mellifera	ncRNA-Seq	unspecified	TRANSCRIPTOMIC	female				Brain	missing
SRR10231790		698525625	292	SINGLE	SAMN12913109	Apis_mellifera	ncRNA-Seq	unspecified	TRANSCRIPTOMIC	female				Brain	missing
SRR10231791		718235175	301	SINGLE	SAMN12913109	Apis_mellifera	ncRNA-Seq	unspecified	TRANSCRIPTOMIC	female				Brain	missing
SRR10231792		681197550	292	SINGLE	SAMN12913109	Apis_mellifera	ncRNA-Seq	unspecified	TRANSCRIPTOMIC	female				Brain	missing
SRR10231793		678589125	295	SINGLE	SAMN12913109	Apis_mellifera	ncRNA-Seq	unspecified	TRANSCRIPTOMIC	female				Brain	missing
SRR10231794		662756625	283	SINGLE	SAMN12913109	Apis_mellifera	ncRNA-Seq	unspecified	TRANSCRIPTOMIC	female				Brain	missing
SRR10231795		683846925	292	SINGLE	SAMN12913109	Apis_mellifera	ncRNA-Seq	unspecified	TRANSCRIPTOMIC	female				Brain	missing
SRR10231787		1319007600	483	PAIRED	SAMN12913107	Apis_mellifera	RNA-Seq	unspecified	TRANSCRIPTOMIC	female				Brain	missing
SRR10231798		1158668700	430	PAIRED	SAMN12913107	Apis_mellifera	RNA-Seq	unspecified	TRANSCRIPTOMIC	female				Brain	missing
SRR10231831		1188328500	438	PAIRED	SAMN12913107	Apis_mellifera	RNA-Seq	unspecified	TRANSCRIPTOMIC	female				Brain	missing
SRR10231809		1204869000	449	PAIRED	SAMN12913107	Apis_mellifera	RNA-Seq	unspecified	TRANSCRIPTOMIC	female				Brain	missing
SRR10231810		576522525	245	SINGLE	SAMN12913107	Apis_mellifera	ncRNA-Seq	unspecified	TRANSCRIPTOMIC	female				Brain	missing
SRR10231811		571698975	246	SINGLE	SAMN12913107	Apis_mellifera	ncRNA-Seq	unspecified	TRANSCRIPTOMIC	female				Brain	missing
SRR10231812		562371000	238	SINGLE	SAMN12913107	Apis_mellifera	ncRNA-Seq	unspecified	TRANSCRIPTOMIC	female				Brain	missing
SRR10231813		577341450	244	SINGLE	SAMN12913107	Apis_mellifera	ncRNA-Seq	unspecified	TRANSCRIPTOMIC	female				Brain	missing
SRR10231814		706274325	298	SINGLE	SAMN12913107	Apis_mellifera	ncRNA-Seq	unspecified	TRANSCRIPTOMIC	female				Brain	missing
SRR10231815		703547625	302	SINGLE	SAMN12913107	Apis_mellifera	ncRNA-Seq	unspecified	TRANSCRIPTOMIC	female				Brain	missing
SRR10231816		688354650	289	SINGLE	SAMN12913107	Apis_mellifera	ncRNA-Seq	unspecified	TRANSCRIPTOMIC	female				Brain	missing
SRR10231817		707017650	297	SINGLE	SAMN12913107	Apis_mellifera	ncRNA-Seq	unspecified	TRANSCRIPTOMIC	female				Brain	missing
SRR10231818		690162300	290	SINGLE	SAMN12913107	Apis_mellifera	ncRNA-Seq	unspecified	TRANSCRIPTOMIC	female				Brain	missing
SRR10231819		686129025	294	SINGLE	SAMN12913107	Apis_mellifera	ncRNA-Seq	unspecified	TRANSCRIPTOMIC	female				Brain	missing
SRR10231820		1129586400	416	PAIRED	SAMN12913107	Apis_mellifera	RNA-Seq	unspecified	TRANSCRIPTOMIC	female				Brain	missing
SRR10231821		673642350	282	SINGLE	SAMN12913107	Apis_mellifera	ncRNA-Seq	unspecified	TRANSCRIPTOMIC	female				Brain	missing
SRR10231822		688691850	288	SINGLE	SAMN12913107	Apis_mellifera	ncRNA-Seq	unspecified	TRANSCRIPTOMIC	female				Brain	missing
SRR10231823		1378581600	509	PAIRED	SAMN12913110	Apis_mellifera	RNA-Seq	unspecified	TRANSCRIPTOMIC	female				Brain	missing
SRR10231824		1421443650	527	PAIRED	SAMN12913110	Apis_mellifera	RNA-Seq	unspecified	TRANSCRIPTOMIC	female				Brain	missing
SRR10231825		1348397100	494	PAIRED	SAMN12913110	Apis_mellifera	RNA-Seq	unspecified	TRANSCRIPTOMIC	female				Brain	missing
SRR10231826		1406019450	516	PAIRED	SAMN12913110	Apis_mellifera	RNA-Seq	unspecified	TRANSCRIPTOMIC	female				Brain	missing
SRR10231827		1411302600	523	PAIRED	SAMN12913110	Apis_mellifera	RNA-Seq	unspecified	TRANSCRIPTOMIC	female				Brain	missing
SRR10231828		1459158900	543	PAIRED	SAMN12913110	Apis_mellifera	RNA-Seq	unspecified	TRANSCRIPTOMIC	female				Brain	missing
SRR10231829		1380171450	508	PAIRED	SAMN12913110	Apis_mellifera	RNA-Seq	unspecified	TRANSCRIPTOMIC	female				Brain	missing
SRR10231830		1443062250	531	PAIRED	SAMN12913110	Apis_mellifera	RNA-Seq	unspecified	TRANSCRIPTOMIC	female				Brain	missing
SRR10231832		1201888500	447	PAIRED	SAMN12913110	Apis_mellifera	RNA-Seq	unspecified	TRANSCRIPTOMIC	female				Brain	missing
SRR10231833		1240324650	463	PAIRED	SAMN12913110	Apis_mellifera	RNA-Seq	unspecified	TRANSCRIPTOMIC	female				Brain	missing
SRR10231834		1176404850	434	PAIRED	SAMN12913110	Apis_mellifera	RNA-Seq	unspecified	TRANSCRIPTOMIC	female				Brain	missing
SRR10231835		1225534350	453	PAIRED	SAMN12913110	Apis_mellifera	RNA-Seq	unspecified	TRANSCRIPTOMIC	female				Brain	missing
SRR10231778		674237325	286	SINGLE	SAMN12913110	Apis_mellifera	ncRNA-Seq	unspecified	TRANSCRIPTOMIC	female				Brain	missing
SRR10231779		674750475	288	SINGLE	SAMN12913110	Apis_mellifera	ncRNA-Seq	unspecified	TRANSCRIPTOMIC	female				Brain	missing
SRR10231780		672928800	292	SINGLE	SAMN12913110	Apis_mellifera	ncRNA-Seq	unspecified	TRANSCRIPTOMIC	female				Brain	missing
SRR10231781		652374900	277	SINGLE	SAMN12913110	Apis_mellifera	ncRNA-Seq	unspecified	TRANSCRIPTOMIC	female				Brain	missing
SRR10231782		666947700	283	SINGLE	SAMN12913110	Apis_mellifera	ncRNA-Seq	unspecified	TRANSCRIPTOMIC	female				Brain	missing
SRR10231849		997514400	367	PAIRED	SAMN12913108	Apis_mellifera	RNA-Seq	unspecified	TRANSCRIPTOMIC	female				Brain	missing
SRR10231850		1023148650	378	PAIRED	SAMN12913108	Apis_mellifera	RNA-Seq	unspecified	TRANSCRIPTOMIC	female				Brain	missing
SRR10231851		975207300	356	PAIRED	SAMN12913108	Apis_mellifera	RNA-Seq	unspecified	TRANSCRIPTOMIC	female				Brain	missing
SRR10231852		1011374850	370	PAIRED	SAMN12913108	Apis_mellifera	RNA-Seq	unspecified	TRANSCRIPTOMIC	female				Brain	missing
SRR10231854		1290331800	474	PAIRED	SAMN12913108	Apis_mellifera	RNA-Seq	unspecified	TRANSCRIPTOMIC	female				Brain	missing
SRR10231855		1332334350	491	PAIRED	SAMN12913108	Apis_mellifera	RNA-Seq	unspecified	TRANSCRIPTOMIC	female				Brain	missing
SRR10231856		1259057250	458	PAIRED	SAMN12913108	Apis_mellifera	RNA-Seq	unspecified	TRANSCRIPTOMIC	female				Brain	missing
SRR10231857		1316925150	480	PAIRED	SAMN12913108	Apis_mellifera	RNA-Seq	unspecified	TRANSCRIPTOMIC	female				Brain	missing
SRR10231838		1521079650	557	PAIRED	SAMN12913109	Apis_mellifera	RNA-Seq	unspecified	TRANSCRIPTOMIC	female				Brain	missing
SRR10231839		1600882950	588	PAIRED	SAMN12913109	Apis_mellifera	RNA-Seq	unspecified	TRANSCRIPTOMIC	female				Brain	missing
SRR10231840		1359673950	503	PAIRED	SAMN12913109	Apis_mellifera	RNA-Seq	unspecified	TRANSCRIPTOMIC	female				Brain	missing
SRR10231841		1421332350	529	PAIRED	SAMN12913109	Apis_mellifera	RNA-Seq	unspecified	TRANSCRIPTOMIC	female				Brain	missing
SRR10231843		1323930000	486	PAIRED	SAMN12913109	Apis_mellifera	RNA-Seq	unspecified	TRANSCRIPTOMIC	female				Brain	missing
SRR10231844		1401029550	516	PAIRED	SAMN12913109	Apis_mellifera	RNA-Seq	unspecified	TRANSCRIPTOMIC	female				Brain	missing
SRR10231845		1256120550	464	PAIRED	SAMN12913109	Apis_mellifera	RNA-Seq	unspecified	TRANSCRIPTOMIC	female				Brain	missing
SRR10231846		1305336300	484	PAIRED	SAMN12913109	Apis_mellifera	RNA-Seq	unspecified	TRANSCRIPTOMIC	female				Brain	missing
SRR10231847		1224445200	448	PAIRED	SAMN12913109	Apis_mellifera	RNA-Seq	unspecified	TRANSCRIPTOMIC	female				Brain	missing
SRR10231848		1288523400	473	PAIRED	SAMN12913109	Apis_mellifera	RNA-Seq	unspecified	TRANSCRIPTOMIC	female				Brain	missing
SRR10231842		1164214800	432	PAIRED	SAMN12913107	Apis_mellifera	RNA-Seq	unspecified	TRANSCRIPTOMIC	female				Brain	missing
SRR10231853		1213297950	451	PAIRED	SAMN12913107	Apis_mellifera	RNA-Seq	unspecified	TRANSCRIPTOMIC	female				Brain	missing
SRR10231858		1065751050	396	PAIRED	SAMN12913108	Apis_mellifera	RNA-Seq	unspecified	TRANSCRIPTOMIC	female				Brain	missing
SRR10231859		1097984700	409	PAIRED	SAMN12913108	Apis_mellifera	RNA-Seq	unspecified	TRANSCRIPTOMIC	female				Brain	missing
SRR10231860		1041348000	383	PAIRED	SAMN12913108	Apis_mellifera	RNA-Seq	unspecified	TRANSCRIPTOMIC	female				Brain	missing
SRR10231861		1086016650	400	PAIRED	SAMN12913108	Apis_mellifera	RNA-Seq	unspecified	TRANSCRIPTOMIC	female				Brain	missing
SRR10231862		1285242600	473	PAIRED	SAMN12913107	Apis_mellifera	RNA-Seq	unspecified	TRANSCRIPTOMIC	female				Brain	missing
SRR10231863		1335142800	493	PAIRED	SAMN12913107	Apis_mellifera	RNA-Seq	unspecified	TRANSCRIPTOMIC	female				Brain	missing
SRR10231864		1132679100	416	PAIRED	SAMN12913107	Apis_mellifera	RNA-Seq	unspecified	TRANSCRIPTOMIC	female				Brain	missing
SRR10231865		1198014150	441	PAIRED	SAMN12913107	Apis_mellifera	RNA-Seq	unspecified	TRANSCRIPTOMIC	female				Brain	missing
SRR9041547		11920223925	5881	PAIRED	SAMN11619535	Apis_mellifera	RNA-Seq	RANDOM	TRANSCRIPTOMIC					Semen	NA
SRR9041548		11769505248	5819	PAIRED	SAMN11619535	Apis_mellifera	RNA-Seq	RANDOM	TRANSCRIPTOMIC					Semen	NA
SRR9041549		10731288222	5298	PAIRED	SAMN11619535	Apis_mellifera	RNA-Seq	RANDOM	TRANSCRIPTOMIC					Semen	NA
SRR9041550		10864101831	5361	PAIRED	SAMN11619536	Apis_mellifera	RNA-Seq	RANDOM	TRANSCRIPTOMIC					Spermethecia_mated	NA
SRR9041551		11206003399	5520	PAIRED	SAMN11619536	Apis_mellifera	RNA-Seq	RANDOM	TRANSCRIPTOMIC					Spermethecia_mated	NA
SRR9041552		11214896233	5542	PAIRED	SAMN11619536	Apis_mellifera	RNA-Seq	RANDOM	TRANSCRIPTOMIC					Spermethecia_mated	NA
SRR9041546		10851442504	5346	PAIRED	SAMN11619537	Apis_mellifera	RNA-Seq	RANDOM	TRANSCRIPTOMIC					Spermetheca_virgin	NA
SRR9041553		11128625451	5491	PAIRED	SAMN11619537	Apis_mellifera	RNA-Seq	RANDOM	TRANSCRIPTOMIC					Spermetheca_virgin	NA
SRR9041554		10310358876	5089	PAIRED	SAMN11619537	Apis_mellifera	RNA-Seq	RANDOM	TRANSCRIPTOMIC					Spermetheca_virgin	NA
SRR10030235	GCA_000002195.1	1639731809	270	SINGLE	SAMN12647700	Apis_mellifera	RNA-Seq	Oligo-dT	TRANSCRIPTOMIC					Fatbody	NA
SRR10030224	GCA_000002195.1	1533865445	260	SINGLE	SAMN12647701	Apis_mellifera	RNA-Seq	Oligo-dT	TRANSCRIPTOMIC					Brain	NA
SRR10030213	GCA_000002195.1	1213677974	186	SINGLE	SAMN12647702	Apis_mellifera	RNA-Seq	Oligo-dT	TRANSCRIPTOMIC					Midgut	NA
SRR10030210	GCA_000002195.1	1513120584	242	SINGLE	SAMN12647703	Apis_mellifera	RNA-Seq	Oligo-dT	TRANSCRIPTOMIC					Brain	NA
SRR10030209	GCA_000002195.1	1661515926	252	SINGLE	SAMN12647704	Apis_mellifera	RNA-Seq	Oligo-dT	TRANSCRIPTOMIC					Midgut	NA
SRR10030242	GCA_000002195.1	1793336324	300	SINGLE	SAMN12647738	Apis_mellifera	RNA-Seq	Oligo-dT	TRANSCRIPTOMIC					Fatbody	NA
SRR10030241	GCA_000002195.1	1816861654	284	SINGLE	SAMN12647739	Apis_mellifera	RNA-Seq	Oligo-dT	TRANSCRIPTOMIC					Fatbody	NA
SRR10030240	GCA_000002195.1	1765378310	287	SINGLE	SAMN12647740	Apis_mellifera	RNA-Seq	Oligo-dT	TRANSCRIPTOMIC					Brain	NA
SRR10030239	GCA_000002195.1	1470852762	236	SINGLE	SAMN12647741	Apis_mellifera	RNA-Seq	Oligo-dT	TRANSCRIPTOMIC					Midgut	NA
SRR10030238	GCA_000002195.1	1475257539	242	SINGLE	SAMN12647742	Apis_mellifera	RNA-Seq	Oligo-dT	TRANSCRIPTOMIC					Fatbody	NA
SRR10030237	GCA_000002195.1	1637789702	257	SINGLE	SAMN12647743	Apis_mellifera	RNA-Seq	Oligo-dT	TRANSCRIPTOMIC					Brain	NA
SRR10030236	GCA_000002195.1	1517618942	246	SINGLE	SAMN12647744	Apis_mellifera	RNA-Seq	Oligo-dT	TRANSCRIPTOMIC					Midgut	NA
SRR10030234	GCA_000002195.1	1278910975	220	SINGLE	SAMN12647745	Apis_mellifera	RNA-Seq	Oligo-dT	TRANSCRIPTOMIC					Fatbody	NA
SRR10030233	GCA_000002195.1	1604049679	259	SINGLE	SAMN12647746	Apis_mellifera	RNA-Seq	Oligo-dT	TRANSCRIPTOMIC					Brain	NA
SRR10030232	GCA_000002195.1	1375948318	243	SINGLE	SAMN12647747	Apis_mellifera	RNA-Seq	Oligo-dT	TRANSCRIPTOMIC					Midgut	NA
SRR10030231	GCA_000002195.1	1994318443	334	SINGLE	SAMN12647748	Apis_mellifera	RNA-Seq	Oligo-dT	TRANSCRIPTOMIC					Fatbody	NA
SRR10030230	GCA_000002195.1	1488942984	245	SINGLE	SAMN12647749	Apis_mellifera	RNA-Seq	Oligo-dT	TRANSCRIPTOMIC					Brain	NA
SRR10030229	GCA_000002195.1	1721534801	270	SINGLE	SAMN12647750	Apis_mellifera	RNA-Seq	Oligo-dT	TRANSCRIPTOMIC					Midgut	NA
SRR10030228	GCA_000002195.1	1540552867	247	SINGLE	SAMN12647751	Apis_mellifera	RNA-Seq	Oligo-dT	TRANSCRIPTOMIC					Fatbody	NA
SRR10030227	GCA_000002195.1	1920267537	306	SINGLE	SAMN12647752	Apis_mellifera	RNA-Seq	Oligo-dT	TRANSCRIPTOMIC					Brain	NA
SRR10030226	GCA_000002195.1	1354338978	209	SINGLE	SAMN12647753	Apis_mellifera	RNA-Seq	Oligo-dT	TRANSCRIPTOMIC					Midgut	NA
SRR10030225	GCA_000002195.1	1848805096	318	SINGLE	SAMN12647754	Apis_mellifera	RNA-Seq	Oligo-dT	TRANSCRIPTOMIC					Fatbody	NA
SRR10030223	GCA_000002195.1	1833628987	298	SINGLE	SAMN12647755	Apis_mellifera	RNA-Seq	Oligo-dT	TRANSCRIPTOMIC					Brain	NA
SRR10030222	GCA_000002195.1	1686474062	273	SINGLE	SAMN12647756	Apis_mellifera	RNA-Seq	Oligo-dT	TRANSCRIPTOMIC					Brain	NA
SRR10030221	GCA_000002195.1	1461959033	223	SINGLE	SAMN12647757	Apis_mellifera	RNA-Seq	Oligo-dT	TRANSCRIPTOMIC					Midgut	NA
SRR10030220	GCA_000002195.1	1579137131	264	SINGLE	SAMN12647758	Apis_mellifera	RNA-Seq	Oligo-dT	TRANSCRIPTOMIC					Fatbody	NA
SRR10030219	GCA_000002195.1	1689462810	278	SINGLE	SAMN12647759	Apis_mellifera	RNA-Seq	Oligo-dT	TRANSCRIPTOMIC					Midgut	NA
SRR10030218	GCA_000002195.1	1855689612	303	SINGLE	SAMN12647760	Apis_mellifera	RNA-Seq	Oligo-dT	TRANSCRIPTOMIC					Brain	NA
SRR10030217	GCA_000002195.1	1679400848	258	SINGLE	SAMN12647761	Apis_mellifera	RNA-Seq	Oligo-dT	TRANSCRIPTOMIC					Midgut	NA
SRR10030216	GCA_000002195.1	1536887477	257	SINGLE	SAMN12647762	Apis_mellifera	RNA-Seq	Oligo-dT	TRANSCRIPTOMIC					Fatbody	NA
SRR10030215	GCA_000002195.1	1703019223	269	SINGLE	SAMN12647763	Apis_mellifera	RNA-Seq	Oligo-dT	TRANSCRIPTOMIC					Brain	NA
SRR10030214	GCA_000002195.1	1612191429	241	SINGLE	SAMN12647764	Apis_mellifera	RNA-Seq	Oligo-dT	TRANSCRIPTOMIC					Midgut	NA
SRR10030212	GCA_000002195.1	1611995355	262	SINGLE	SAMN12647765	Apis_mellifera	RNA-Seq	Oligo-dT	TRANSCRIPTOMIC					Fatbody	NA
SRR10030211	GCA_000002195.1	1764062028	288	SINGLE	SAMN12647766	Apis_mellifera	RNA-Seq	Oligo-dT	TRANSCRIPTOMIC					Fatbody	NA
SRR10030280	GCA_000002195.1	1584485950	254	SINGLE	SAMN12647695	Apis_mellifera	RNA-Seq	Oligo-dT	TRANSCRIPTOMIC					Brain	NA
SRR10030279	GCA_000002195.1	1412173592	226	SINGLE	SAMN12647696	Apis_mellifera	RNA-Seq	Oligo-dT	TRANSCRIPTOMIC					Midgut	NA
SRR10030268	GCA_000002195.1	1801655738	289	SINGLE	SAMN12647697	Apis_mellifera	RNA-Seq	Oligo-dT	TRANSCRIPTOMIC					Fatbody	NA
SRR10030257	GCA_000002195.1	1549389447	250	SINGLE	SAMN12647698	Apis_mellifera	RNA-Seq	Oligo-dT	TRANSCRIPTOMIC					Brain	NA
SRR10030246	GCA_000002195.1	1429402322	221	SINGLE	SAMN12647699	Apis_mellifera	RNA-Seq	Oligo-dT	TRANSCRIPTOMIC					Midgut	NA
SRR10030278	GCA_000002195.1	1437012542	232	SINGLE	SAMN12647705	Apis_mellifera	RNA-Seq	Oligo-dT	TRANSCRIPTOMIC					Brain	NA
SRR10030277	GCA_000002195.1	1382402671	221	SINGLE	SAMN12647706	Apis_mellifera	RNA-Seq	Oligo-dT	TRANSCRIPTOMIC					Midgut	NA
SRR10030276	GCA_000002195.1	1545176204	260	SINGLE	SAMN12647707	Apis_mellifera	RNA-Seq	Oligo-dT	TRANSCRIPTOMIC					Brain	NA
SRR10030275	GCA_000002195.1	1871276517	278	SINGLE	SAMN12647708	Apis_mellifera	RNA-Seq	Oligo-dT	TRANSCRIPTOMIC					Midgut	NA
SRR10030274	GCA_000002195.1	2064861179	340	SINGLE	SAMN12647709	Apis_mellifera	RNA-Seq	Oligo-dT	TRANSCRIPTOMIC					Fatbody	NA
SRR10030273	GCA_000002195.1	1540528640	256	SINGLE	SAMN12647710	Apis_mellifera	RNA-Seq	Oligo-dT	TRANSCRIPTOMIC					Brain	NA
SRR10030272	GCA_000002195.1	1952476891	291	SINGLE	SAMN12647711	Apis_mellifera	RNA-Seq	Oligo-dT	TRANSCRIPTOMIC					Midgut	NA
SRR10030271	GCA_000002195.1	1651578055	269	SINGLE	SAMN12647712	Apis_mellifera	RNA-Seq	Oligo-dT	TRANSCRIPTOMIC					Fatbody	NA
SRR10030270	GCA_000002195.1	1651220848	263	SINGLE	SAMN12647713	Apis_mellifera	RNA-Seq	Oligo-dT	TRANSCRIPTOMIC					Brain	NA
SRR10030269	GCA_000002195.1	1690093600	264	SINGLE	SAMN12647714	Apis_mellifera	RNA-Seq	Oligo-dT	TRANSCRIPTOMIC					Midgut	NA
SRR10030267	GCA_000002195.1	1569913684	263	SINGLE	SAMN12647715	Apis_mellifera	RNA-Seq	Oligo-dT	TRANSCRIPTOMIC					Fatbody	NA
SRR10030266	GCA_000002195.1	1656164707	272	SINGLE	SAMN12647716	Apis_mellifera	RNA-Seq	Oligo-dT	TRANSCRIPTOMIC					Brain	NA
SRR10030265	GCA_000002195.1	1514613686	239	SINGLE	SAMN12647717	Apis_mellifera	RNA-Seq	Oligo-dT	TRANSCRIPTOMIC					Midgut	NA
SRR10030264	GCA_000002195.1	1620721156	279	SINGLE	SAMN12647718	Apis_mellifera	RNA-Seq	Oligo-dT	TRANSCRIPTOMIC					Fatbody	NA
SRR10030263	GCA_000002195.1	1518673808	249	SINGLE	SAMN12647719	Apis_mellifera	RNA-Seq	Oligo-dT	TRANSCRIPTOMIC					Brain	NA
SRR10030262	GCA_000002195.1	1699281965	262	SINGLE	SAMN12647720	Apis_mellifera	RNA-Seq	Oligo-dT	TRANSCRIPTOMIC					Midgut	NA
SRR10030261	GCA_000002195.1	1608960422	254	SINGLE	SAMN12647721	Apis_mellifera	RNA-Seq	Oligo-dT	TRANSCRIPTOMIC					Fatbody	NA
SRR10030260	GCA_000002195.1	1728180227	280	SINGLE	SAMN12647722	Apis_mellifera	RNA-Seq	Oligo-dT	TRANSCRIPTOMIC					Brain	NA
SRR10030259	GCA_000002195.1	1534640806	244	SINGLE	SAMN12647723	Apis_mellifera	RNA-Seq	Oligo-dT	TRANSCRIPTOMIC					Midgut	NA
SRR10030258	GCA_000002195.1	1532115674	249	SINGLE	SAMN12647724	Apis_mellifera	RNA-Seq	Oligo-dT	TRANSCRIPTOMIC					Fatbody	NA
SRR10030256	GCA_000002195.1	1605575061	266	SINGLE	SAMN12647725	Apis_mellifera	RNA-Seq	Oligo-dT	TRANSCRIPTOMIC					Brain	NA
SRR10030255	GCA_000002195.1	1446895013	227	SINGLE	SAMN12647726	Apis_mellifera	RNA-Seq	Oligo-dT	TRANSCRIPTOMIC					Midgut	NA
SRR10030254	GCA_000002195.1	1574421278	264	SINGLE	SAMN12647727	Apis_mellifera	RNA-Seq	Oligo-dT	TRANSCRIPTOMIC					Fatbody	NA
SRR10030253	GCA_000002195.1	1466858322	248	SINGLE	SAMN12647728	Apis_mellifera	RNA-Seq	Oligo-dT	TRANSCRIPTOMIC					Brain	NA
SRR10030252	GCA_000002195.1	1600400209	238	SINGLE	SAMN12647729	Apis_mellifera	RNA-Seq	Oligo-dT	TRANSCRIPTOMIC					Midgut	NA
SRR10030251	GCA_000002195.1	1617303329	256	SINGLE	SAMN12647730	Apis_mellifera	RNA-Seq	Oligo-dT	TRANSCRIPTOMIC					Fatbody	NA
SRR10030250	GCA_000002195.1	1437671141	238	SINGLE	SAMN12647731	Apis_mellifera	RNA-Seq	Oligo-dT	TRANSCRIPTOMIC					Brain	NA
SRR10030249	GCA_000002195.1	1567110047	258	SINGLE	SAMN12647732	Apis_mellifera	RNA-Seq	Oligo-dT	TRANSCRIPTOMIC					Brain	NA
SRR10030248	GCA_000002195.1	1537749481	240	SINGLE	SAMN12647733	Apis_mellifera	RNA-Seq	Oligo-dT	TRANSCRIPTOMIC					Midgut	NA
SRR10030247	GCA_000002195.1	1205875764	210	SINGLE	SAMN12647734	Apis_mellifera	RNA-Seq	Oligo-dT	TRANSCRIPTOMIC					Fatbody	NA
SRR10030245	GCA_000002195.1	1504477048	240	SINGLE	SAMN12647735	Apis_mellifera	RNA-Seq	Oligo-dT	TRANSCRIPTOMIC					Brain	NA
SRR10030244	GCA_000002195.1	1278923538	213	SINGLE	SAMN12647736	Apis_mellifera	RNA-Seq	Oligo-dT	TRANSCRIPTOMIC					Midgut	NA
SRR10030243	GCA_000002195.1	1537074591	239	SINGLE	SAMN12647737	Apis_mellifera	RNA-Seq	Oligo-dT	TRANSCRIPTOMIC					Midgut	NA
SRR9953274		918703900	577	SINGLE	SAMN12562770	Apis_mellifera	miRNA-Seq	PCR	TRANSCRIPTOMIC	female				brain	adult
SRR9705242		868363476	338	SINGLE	SAMN11466366	Apis_mellifera	RNA-Seq	RT-PCR	TRANSCRIPTOMIC					Pupa	NA
SRR9705243		811965112	313	SINGLE	SAMN11466367	Apis_mellifera	RNA-Seq	RT-PCR	TRANSCRIPTOMIC					Abdomen	NA
SRR9705244		724645910	281	SINGLE	SAMN11466368	Apis_mellifera	RNA-Seq	RT-PCR	TRANSCRIPTOMIC					Abdomen	NA
SRR9705245		919915776	359	SINGLE	SAMN11466369	Apis_mellifera	RNA-Seq	RT-PCR	TRANSCRIPTOMIC					Abdomen	NA
SRR9705238		903089467	348	SINGLE	SAMN11466370	Apis_mellifera	RNA-Seq	RT-PCR	TRANSCRIPTOMIC					Head	NA
SRR9705239		724696684	279	SINGLE	SAMN11466371	Apis_mellifera	RNA-Seq	RT-PCR	TRANSCRIPTOMIC					Head	NA
SRR9705240		459573359	180	SINGLE	SAMN11466372	Apis_mellifera	RNA-Seq	RT-PCR	TRANSCRIPTOMIC					Head	NA
SRR9705241		554797803	214	SINGLE	SAMN11466373	Apis_mellifera	RNA-Seq	RT-PCR	TRANSCRIPTOMIC					Thorax	NA
SRR9705236		712120200	275	SINGLE	SAMN11466374	Apis_mellifera	RNA-Seq	RT-PCR	TRANSCRIPTOMIC					Thorax	NA
SRR9705237		800855110	305	SINGLE	SAMN11466375	Apis_mellifera	RNA-Seq	RT-PCR	TRANSCRIPTOMIC					Thorax	NA
SRR9705229		941332269	374	SINGLE	SAMN11466376	Apis_mellifera	RNA-Seq	RT-PCR	TRANSCRIPTOMIC					Larva	NA
SRR9705228		1225038229	477	SINGLE	SAMN11466377	Apis_mellifera	RNA-Seq	RT-PCR	TRANSCRIPTOMIC					Larva	NA
SRR9705227		966131976	378	SINGLE	SAMN11466378	Apis_mellifera	RNA-Seq	RT-PCR	TRANSCRIPTOMIC					Larva	NA
SRR9705226		785332781	305	SINGLE	SAMN11466379	Apis_mellifera	RNA-Seq	RT-PCR	TRANSCRIPTOMIC					Larva	NA
SRR9705233		876739256	344	SINGLE	SAMN11466380	Apis_mellifera	RNA-Seq	RT-PCR	TRANSCRIPTOMIC					Larva	NA
SRR9705232		473122331	186	SINGLE	SAMN11466381	Apis_mellifera	RNA-Seq	RT-PCR	TRANSCRIPTOMIC					Larva	NA
SRR9705231		576027240	256	SINGLE	SAMN11466382	Apis_mellifera	RNA-Seq	RT-PCR	TRANSCRIPTOMIC					Larva	NA
SRR9705230		528217045	206	SINGLE	SAMN11466383	Apis_mellifera	RNA-Seq	RT-PCR	TRANSCRIPTOMIC					Larva	NA
SRR9705235		831751369	324	SINGLE	SAMN11466384	Apis_mellifera	RNA-Seq	RT-PCR	TRANSCRIPTOMIC					Larva	NA
SRR9705234		999750146	392	SINGLE	SAMN11466385	Apis_mellifera	RNA-Seq	RT-PCR	TRANSCRIPTOMIC					Larva	NA
SRR9705247		725824153	287	SINGLE	SAMN11466404	Apis_mellifera	RNA-Seq	RT-PCR	TRANSCRIPTOMIC					Larva	NA
SRR9705246		489887176	193	SINGLE	SAMN11466405	Apis_mellifera	RNA-Seq	RT-PCR	TRANSCRIPTOMIC					Larva	NA
SRR9705273		772312885	298	SINGLE	SAMN11466326	Apis_mellifera	RNA-Seq	RT-PCR	TRANSCRIPTOMIC					Abdomen	NA
SRR9705272		772948794	307	SINGLE	SAMN11466327	Apis_mellifera	RNA-Seq	RT-PCR	TRANSCRIPTOMIC					Abdomen	NA
SRR9705275		916230478	354	SINGLE	SAMN11466328	Apis_mellifera	RNA-Seq	RT-PCR	TRANSCRIPTOMIC					Abdomen	NA
SRR9705274		937354796	369	SINGLE	SAMN11466329	Apis_mellifera	RNA-Seq	RT-PCR	TRANSCRIPTOMIC					Head	NA
SRR9705269		773625985	301	SINGLE	SAMN11466330	Apis_mellifera	RNA-Seq	RT-PCR	TRANSCRIPTOMIC					Head	NA
SRR9705268		843883059	327	SINGLE	SAMN11466331	Apis_mellifera	RNA-Seq	RT-PCR	TRANSCRIPTOMIC					Head	NA
SRR9705271		666227243	257	SINGLE	SAMN11466332	Apis_mellifera	RNA-Seq	RT-PCR	TRANSCRIPTOMIC					Thorax	NA
SRR9705270		838478096	322	SINGLE	SAMN11466333	Apis_mellifera	RNA-Seq	RT-PCR	TRANSCRIPTOMIC					Thorax	NA
SRR9705267		820204994	317	SINGLE	SAMN11466334	Apis_mellifera	RNA-Seq	RT-PCR	TRANSCRIPTOMIC					Thorax	NA
SRR9705266		1306245389	513	SINGLE	SAMN11466335	Apis_mellifera	RNA-Seq	RT-PCR	TRANSCRIPTOMIC					Egg	NA
SRR9705285		918935562	361	SINGLE	SAMN11466336	Apis_mellifera	RNA-Seq	RT-PCR	TRANSCRIPTOMIC					Egg	NA
SRR9705284		1006066514	393	SINGLE	SAMN11466337	Apis_mellifera	RNA-Seq	RT-PCR	TRANSCRIPTOMIC					Egg	NA
SRR9705283		692309338	270	SINGLE	SAMN11466338	Apis_mellifera	RNA-Seq	RT-PCR	TRANSCRIPTOMIC					Abdomen	NA
SRR9705282		670513242	258	SINGLE	SAMN11466339	Apis_mellifera	RNA-Seq	RT-PCR	TRANSCRIPTOMIC					Abdomen	NA
SRR9705281		862686466	332	SINGLE	SAMN11466340	Apis_mellifera	RNA-Seq	RT-PCR	TRANSCRIPTOMIC					Abdomen	NA
SRR9705280		682686640	266	SINGLE	SAMN11466341	Apis_mellifera	RNA-Seq	RT-PCR	TRANSCRIPTOMIC					Head	NA
SRR9705279		825936447	323	SINGLE	SAMN11466342	Apis_mellifera	RNA-Seq	RT-PCR	TRANSCRIPTOMIC					Head	NA
SRR9705278		750168325	293	SINGLE	SAMN11466343	Apis_mellifera	RNA-Seq	RT-PCR	TRANSCRIPTOMIC					Head	NA
SRR9705277		656490064	259	SINGLE	SAMN11466344	Apis_mellifera	RNA-Seq	RT-PCR	TRANSCRIPTOMIC					Thorax	NA
SRR9705276		482625234	191	SINGLE	SAMN11466345	Apis_mellifera	RNA-Seq	RT-PCR	TRANSCRIPTOMIC					Thorax	NA
SRR9705307		1042328200	402	SINGLE	SAMN11466348	Apis_mellifera	RNA-Seq	RT-PCR	TRANSCRIPTOMIC					Pupa	NA
SRR9705305		854765454	343	SINGLE	SAMN11466350	Apis_mellifera	RNA-Seq	RT-PCR	TRANSCRIPTOMIC					Pupa	NA
SRR9705306		945571701	361	SINGLE	SAMN11466351	Apis_mellifera	RNA-Seq	RT-PCR	TRANSCRIPTOMIC					Pupa	NA
SRR9705303		810759499	314	SINGLE	SAMN11466352	Apis_mellifera	RNA-Seq	RT-PCR	TRANSCRIPTOMIC					Larva	NA
SRR9705304		512829594	201	SINGLE	SAMN11466353	Apis_mellifera	RNA-Seq	RT-PCR	TRANSCRIPTOMIC					Larva	NA
SRR9705298		1038007254	407	SINGLE	SAMN11466356	Apis_mellifera	RNA-Seq	RT-PCR	TRANSCRIPTOMIC					Abdomen	NA
SRR9705297		1012271967	397	SINGLE	SAMN11466357	Apis_mellifera	RNA-Seq	RT-PCR	TRANSCRIPTOMIC					Abdomen	NA
SRR9705300		880008455	345	SINGLE	SAMN11466358	Apis_mellifera	RNA-Seq	RT-PCR	TRANSCRIPTOMIC					Head	NA
SRR9705299		1012906745	394	SINGLE	SAMN11466359	Apis_mellifera	RNA-Seq	RT-PCR	TRANSCRIPTOMIC					Head	NA
SRR9705294		740599454	288	SINGLE	SAMN11466360	Apis_mellifera	RNA-Seq	RT-PCR	TRANSCRIPTOMIC					Head	NA
SRR9705293		842065686	332	SINGLE	SAMN11466361	Apis_mellifera	RNA-Seq	RT-PCR	TRANSCRIPTOMIC					Thorax	NA
SRR9705296		803861022	309	SINGLE	SAMN11466362	Apis_mellifera	RNA-Seq	RT-PCR	TRANSCRIPTOMIC					Thorax	NA
SRR9705295		1036944425	404	SINGLE	SAMN11466363	Apis_mellifera	RNA-Seq	RT-PCR	TRANSCRIPTOMIC					Thorax	NA
SRR9705302		777079828	305	SINGLE	SAMN11466364	Apis_mellifera	RNA-Seq	RT-PCR	TRANSCRIPTOMIC					Pupa	NA
SRR9705301		1106760099	428	SINGLE	SAMN11466365	Apis_mellifera	RNA-Seq	RT-PCR	TRANSCRIPTOMIC					Pupa	NA
SRR9705260		992649963	388	SINGLE	SAMN11466386	Apis_mellifera	RNA-Seq	RT-PCR	TRANSCRIPTOMIC					Larva	NA
SRR9705261		897326571	350	SINGLE	SAMN11466387	Apis_mellifera	RNA-Seq	RT-PCR	TRANSCRIPTOMIC					Larva	NA
SRR9705258		788298067	307	SINGLE	SAMN11466388	Apis_mellifera	RNA-Seq	RT-PCR	TRANSCRIPTOMIC					Abdomen	NA
SRR9705259		891639310	340	SINGLE	SAMN11466389	Apis_mellifera	RNA-Seq	RT-PCR	TRANSCRIPTOMIC					Abdomen	NA
SRR9705264		952896516	365	SINGLE	SAMN11466390	Apis_mellifera	RNA-Seq	RT-PCR	TRANSCRIPTOMIC					Abdomen	NA
SRR9705265		659073545	256	SINGLE	SAMN11466391	Apis_mellifera	RNA-Seq	RT-PCR	TRANSCRIPTOMIC					Head	NA
SRR9705262		748075694	285	SINGLE	SAMN11466392	Apis_mellifera	RNA-Seq	RT-PCR	TRANSCRIPTOMIC					Head	NA
SRR9705263		928199825	354	SINGLE	SAMN11466393	Apis_mellifera	RNA-Seq	RT-PCR	TRANSCRIPTOMIC					Head	NA
SRR9705256		659978778	254	SINGLE	SAMN11466394	Apis_mellifera	RNA-Seq	RT-PCR	TRANSCRIPTOMIC					Thorax	NA
SRR9705257		997759934	375	SINGLE	SAMN11466395	Apis_mellifera	RNA-Seq	RT-PCR	TRANSCRIPTOMIC					Thorax	NA
SRR9705249		743054808	285	SINGLE	SAMN11466396	Apis_mellifera	RNA-Seq	RT-PCR	TRANSCRIPTOMIC					Thorax	NA
SRR9705248		813060249	317	SINGLE	SAMN11466397	Apis_mellifera	RNA-Seq	RT-PCR	TRANSCRIPTOMIC					Larva	NA
SRR9705251		1105197205	431	SINGLE	SAMN11466398	Apis_mellifera	RNA-Seq	RT-PCR	TRANSCRIPTOMIC					Larva	NA
SRR9705250		1409140301	554	SINGLE	SAMN11466399	Apis_mellifera	RNA-Seq	RT-PCR	TRANSCRIPTOMIC					Larva	NA
SRR9705253		464685065	183	SINGLE	SAMN11466400	Apis_mellifera	RNA-Seq	RT-PCR	TRANSCRIPTOMIC					Larva	NA
SRR9705252		552003911	217	SINGLE	SAMN11466401	Apis_mellifera	RNA-Seq	RT-PCR	TRANSCRIPTOMIC					Larva	NA
SRR9705255		711102564	280	SINGLE	SAMN11466402	Apis_mellifera	RNA-Seq	RT-PCR	TRANSCRIPTOMIC					Larva	NA
SRR9705254		1046965643	423	SINGLE	SAMN11466403	Apis_mellifera	RNA-Seq	RT-PCR	TRANSCRIPTOMIC					Larva	NA
SRR9705286		498563647	197	SINGLE	SAMN11466406	Apis_mellifera	RNA-Seq	RT-PCR	TRANSCRIPTOMIC					Larva	NA
SRR9705287		1037827905	400	SINGLE	SAMN11466407	Apis_mellifera	RNA-Seq	RT-PCR	TRANSCRIPTOMIC					Larva	NA
SRR9705288		1007366058	407	SINGLE	SAMN11466408	Apis_mellifera	RNA-Seq	RT-PCR	TRANSCRIPTOMIC					Larva	NA
SRR9705289		1094323821	425	SINGLE	SAMN11466409	Apis_mellifera	RNA-Seq	RT-PCR	TRANSCRIPTOMIC					Pupa	NA
SRR9705290		921781344	362	SINGLE	SAMN11466410	Apis_mellifera	RNA-Seq	RT-PCR	TRANSCRIPTOMIC					Pupa	NA
SRR9705291		968338616	378	SINGLE	SAMN11466411	Apis_mellifera	RNA-Seq	RT-PCR	TRANSCRIPTOMIC					Pupa	NA
SRR9705292		1143574094	445	SINGLE	SAMN11466412	Apis_mellifera	RNA-Seq	RT-PCR	TRANSCRIPTOMIC					Pupa	NA
SRR9705309		866170660	335	SINGLE	SAMN11466346	Apis_mellifera	RNA-Seq	RT-PCR	TRANSCRIPTOMIC					Thorax	NA
SRR9705310		873202225	352	SINGLE	SAMN11466347	Apis_mellifera	RNA-Seq	RT-PCR	TRANSCRIPTOMIC					Pupa	NA
SRR9705308		849420298	327	SINGLE	SAMN11466349	Apis_mellifera	RNA-Seq	RT-PCR	TRANSCRIPTOMIC					Pupa	NA
SRR9705311		1010421059	395	SINGLE	SAMN11466354	Apis_mellifera	RNA-Seq	RT-PCR	TRANSCRIPTOMIC					Larva	NA
SRR9705312		860403716	340	SINGLE	SAMN11466355	Apis_mellifera	RNA-Seq	RT-PCR	TRANSCRIPTOMIC					Abdomen	NA
SRR9007948		5866398800	3618	PAIRED	SAMN11570256	Apis_mellifera	RNA-Seq	cDNA	TRANSCRIPTOMIC					mushroom bodies	NA
SRR9007949		4011519400	2469	PAIRED	SAMN11570255	Apis_mellifera	RNA-Seq	cDNA	TRANSCRIPTOMIC					mushroom bodies	NA
SRR9007950		3565764800	2330	PAIRED	SAMN11570254	Apis_mellifera	RNA-Seq	cDNA	TRANSCRIPTOMIC					mushroom bodies	NA
SRR9007951		4952478800	3047	PAIRED	SAMN11570253	Apis_mellifera	RNA-Seq	cDNA	TRANSCRIPTOMIC					mushroom bodies	NA
SRR9007952		5248358400	3433	PAIRED	SAMN11570252	Apis_mellifera	RNA-Seq	cDNA	TRANSCRIPTOMIC					mushroom bodies	NA
SRR9007953		5032395200	3019	PAIRED	SAMN11570307	Apis_mellifera	RNA-Seq	cDNA	TRANSCRIPTOMIC					mushroom bodies	NA
SRR9007954		4777740600	3133	PAIRED	SAMN11570306	Apis_mellifera	RNA-Seq	cDNA	TRANSCRIPTOMIC					mushroom bodies	NA
SRR9007955		4831483200	2964	PAIRED	SAMN11570305	Apis_mellifera	RNA-Seq	cDNA	TRANSCRIPTOMIC					mushroom bodies	NA
SRR9007956		4952805400	3237	PAIRED	SAMN11570304	Apis_mellifera	RNA-Seq	cDNA	TRANSCRIPTOMIC					mushroom bodies	NA
SRR9007957		5179676800	3107	PAIRED	SAMN11570303	Apis_mellifera	RNA-Seq	cDNA	TRANSCRIPTOMIC					mushroom bodies	NA
SRR9007958		5360503200	3161	PAIRED	SAMN11570302	Apis_mellifera	RNA-Seq	cDNA	TRANSCRIPTOMIC					mushroom bodies	NA
SRR9007959		4388076200	2629	PAIRED	SAMN11570301	Apis_mellifera	RNA-Seq	cDNA	TRANSCRIPTOMIC					mushroom bodies	NA
SRR9007960		4441008200	2619	PAIRED	SAMN11570308	Apis_mellifera	RNA-Seq	cDNA	TRANSCRIPTOMIC					mushroom bodies	NA
SRR9007961		5091946600	3002	PAIRED	SAMN11570300	Apis_mellifera	RNA-Seq	cDNA	TRANSCRIPTOMIC					mushroom bodies	NA
SRR9007962		5387575400	3238	PAIRED	SAMN11570299	Apis_mellifera	RNA-Seq	cDNA	TRANSCRIPTOMIC					mushroom bodies	NA
SRR9007963		4920860600	2926	PAIRED	SAMN11570298	Apis_mellifera	RNA-Seq	cDNA	TRANSCRIPTOMIC					mushroom bodies	NA
SRR9007964		4659622200	2837	PAIRED	SAMN11570297	Apis_mellifera	RNA-Seq	cDNA	TRANSCRIPTOMIC					mushroom bodies	NA
SRR9007965		6538837400	3988	PAIRED	SAMN11570296	Apis_mellifera	RNA-Seq	cDNA	TRANSCRIPTOMIC					mushroom bodies	NA
SRR9007966		5193055000	3159	PAIRED	SAMN11570295	Apis_mellifera	RNA-Seq	cDNA	TRANSCRIPTOMIC					mushroom bodies	NA
SRR9007967		5330445600	3239	PAIRED	SAMN11570294	Apis_mellifera	RNA-Seq	cDNA	TRANSCRIPTOMIC					mushroom bodies	NA
SRR9007968		6199683200	3776	PAIRED	SAMN11570293	Apis_mellifera	RNA-Seq	cDNA	TRANSCRIPTOMIC					mushroom bodies	NA
SRR9007969		5592544800	3397	PAIRED	SAMN11570292	Apis_mellifera	RNA-Seq	cDNA	TRANSCRIPTOMIC					mushroom bodies	NA
SRR9007970		4405968200	2690	PAIRED	SAMN11570291	Apis_mellifera	RNA-Seq	cDNA	TRANSCRIPTOMIC					mushroom bodies	NA
SRR9007971		4944929600	3014	PAIRED	SAMN11570336	Apis_mellifera	RNA-Seq	cDNA	TRANSCRIPTOMIC					mushroom bodies	NA
SRR9007972		4096956000	2537	PAIRED	SAMN11570335	Apis_mellifera	RNA-Seq	cDNA	TRANSCRIPTOMIC					mushroom bodies	NA
SRR9007973		4755926200	2926	PAIRED	SAMN11570334	Apis_mellifera	RNA-Seq	cDNA	TRANSCRIPTOMIC					mushroom bodies	NA
SRR9007974		5353910800	3318	PAIRED	SAMN11570333	Apis_mellifera	RNA-Seq	cDNA	TRANSCRIPTOMIC					mushroom bodies	NA
SRR9007975		5565098400	3318	PAIRED	SAMN11570332	Apis_mellifera	RNA-Seq	cDNA	TRANSCRIPTOMIC					mushroom bodies	NA
SRR9007976		4932059000	3195	PAIRED	SAMN11570331	Apis_mellifera	RNA-Seq	cDNA	TRANSCRIPTOMIC					mushroom bodies	NA
SRR9007977		5073556800	3273	PAIRED	SAMN11570330	Apis_mellifera	RNA-Seq	cDNA	TRANSCRIPTOMIC					mushroom bodies	NA
SRR9007978		5702061400	3686	PAIRED	SAMN11570329	Apis_mellifera	RNA-Seq	cDNA	TRANSCRIPTOMIC					mushroom bodies	NA
SRR9007979		4440799800	2832	PAIRED	SAMN11570328	Apis_mellifera	RNA-Seq	cDNA	TRANSCRIPTOMIC					mushroom bodies	NA
SRR9007980		4770919400	3036	PAIRED	SAMN11570327	Apis_mellifera	RNA-Seq	cDNA	TRANSCRIPTOMIC					mushroom bodies	NA
SRR9007981		4846417600	3087	PAIRED	SAMN11570326	Apis_mellifera	RNA-Seq	cDNA	TRANSCRIPTOMIC					mushroom bodies	NA
SRR9007982		4638344800	2947	PAIRED	SAMN11570325	Apis_mellifera	RNA-Seq	cDNA	TRANSCRIPTOMIC					mushroom bodies	NA
SRR9007983		5307337400	3251	PAIRED	SAMN11570324	Apis_mellifera	RNA-Seq	cDNA	TRANSCRIPTOMIC					mushroom bodies	NA
SRR9007984		5913928000	3655	PAIRED	SAMN11570323	Apis_mellifera	RNA-Seq	cDNA	TRANSCRIPTOMIC					mushroom bodies	NA
SRR9007985		4888005400	3088	PAIRED	SAMN11570322	Apis_mellifera	RNA-Seq	cDNA	TRANSCRIPTOMIC					mushroom bodies	NA
SRR9007986		4312311400	2733	PAIRED	SAMN11570321	Apis_mellifera	RNA-Seq	cDNA	TRANSCRIPTOMIC					mushroom bodies	NA
SRR9007943		5157431200	3157	PAIRED	SAMN11570360	Apis_mellifera	RNA-Seq	cDNA	TRANSCRIPTOMIC					mushroom bodies	NA
SRR9007944		5595217800	3418	PAIRED	SAMN11570359	Apis_mellifera	RNA-Seq	cDNA	TRANSCRIPTOMIC					mushroom bodies	NA
SRR9007945		7835837600	4742	PAIRED	SAMN11570358	Apis_mellifera	RNA-Seq	cDNA	TRANSCRIPTOMIC					mushroom bodies	NA
SRR9007946		5274454000	3186	PAIRED	SAMN11570357	Apis_mellifera	RNA-Seq	cDNA	TRANSCRIPTOMIC					mushroom bodies	NA
SRR9007947		3750220600	2291	PAIRED	SAMN11570356	Apis_mellifera	RNA-Seq	cDNA	TRANSCRIPTOMIC					mushroom bodies	NA
SRR9020425		7616355424	4135	PAIRED	SAMN11583537	Apis_mellifera	RNA-Seq	cDNA	TRANSCRIPTOMIC					mushroom bodies	NA
SRR9020426		10722097864	5799	PAIRED	SAMN11583537	Apis_mellifera	RNA-Seq	cDNA	TRANSCRIPTOMIC					mushroom bodies	NA
SRR9020427		8140174536	4424	PAIRED	SAMN11583537	Apis_mellifera	RNA-Seq	cDNA	TRANSCRIPTOMIC					mushroom bodies	NA
SRR9020428		7092924736	3950	PAIRED	SAMN11583537	Apis_mellifera	RNA-Seq	cDNA	TRANSCRIPTOMIC					mushroom bodies	NA
SRR9020421		8100128776	4407	PAIRED	SAMN11583536	Apis_mellifera	RNA-Seq	cDNA	TRANSCRIPTOMIC					whole brain	NA
SRR9020422		7779637576	4337	PAIRED	SAMN11583536	Apis_mellifera	RNA-Seq	cDNA	TRANSCRIPTOMIC					whole brain	NA
SRR9020423		8734685528	4839	PAIRED	SAMN11583536	Apis_mellifera	RNA-Seq	cDNA	TRANSCRIPTOMIC					whole brain	NA
SRR9020424		9580145288	5248	PAIRED	SAMN11583536	Apis_mellifera	RNA-Seq	cDNA	TRANSCRIPTOMIC					whole brain	NA
SRR9007879		3060860918	1160	SINGLE	SAMN11570349	Apis_mellifera	RNA-Seq	cDNA	TRANSCRIPTOMIC					brain	NA
SRR9007880		2746018509	1044	SINGLE	SAMN11570345	Apis_mellifera	RNA-Seq	cDNA	TRANSCRIPTOMIC					brain	NA
SRR9007881		3623109485	1369	SINGLE	SAMN11570344	Apis_mellifera	RNA-Seq	cDNA	TRANSCRIPTOMIC					brain	NA
SRR9007882		3032003414	1154	SINGLE	SAMN11570343	Apis_mellifera	RNA-Seq	cDNA	TRANSCRIPTOMIC					brain	NA
SRR9007883		2927282671	1112	SINGLE	SAMN11570342	Apis_mellifera	RNA-Seq	cDNA	TRANSCRIPTOMIC					brain	NA
SRR9007884		3482142403	1323	SINGLE	SAMN11570341	Apis_mellifera	RNA-Seq	cDNA	TRANSCRIPTOMIC					brain	NA
SRR9007885		3225121503	1221	SINGLE	SAMN11570340	Apis_mellifera	RNA-Seq	cDNA	TRANSCRIPTOMIC					brain	NA
SRR9007886		3114187462	1206	SINGLE	SAMN11570339	Apis_mellifera	RNA-Seq	cDNA	TRANSCRIPTOMIC					brain	NA
SRR9007887		3203371246	1199	SINGLE	SAMN11570338	Apis_mellifera	RNA-Seq	cDNA	TRANSCRIPTOMIC					brain	NA
SRR9007888		3190000646	1191	SINGLE	SAMN11570058	Apis_mellifera	RNA-Seq	cDNA	TRANSCRIPTOMIC					brain	NA
SRR9007889		3715550549	1414	SINGLE	SAMN11570251	Apis_mellifera	RNA-Seq	cDNA	TRANSCRIPTOMIC					brain	NA
SRR9007890		3309406172	1260	SINGLE	SAMN11570250	Apis_mellifera	RNA-Seq	cDNA	TRANSCRIPTOMIC					brain	NA
SRR9007891		3272427925	1243	SINGLE	SAMN11570249	Apis_mellifera	RNA-Seq	cDNA	TRANSCRIPTOMIC					brain	NA
SRR9007892		3029202965	1150	SINGLE	SAMN11570248	Apis_mellifera	RNA-Seq	cDNA	TRANSCRIPTOMIC					brain	NA
SRR9007893		3593732639	1371	SINGLE	SAMN11570247	Apis_mellifera	RNA-Seq	cDNA	TRANSCRIPTOMIC					brain	NA
SRR9007894		3190805522	1224	SINGLE	SAMN11570246	Apis_mellifera	RNA-Seq	cDNA	TRANSCRIPTOMIC					brain	NA
SRR9007895		2998934482	1135	SINGLE	SAMN11570245	Apis_mellifera	RNA-Seq	cDNA	TRANSCRIPTOMIC					brain	NA
SRR9007896		3592426423	1363	SINGLE	SAMN11570244	Apis_mellifera	RNA-Seq	cDNA	TRANSCRIPTOMIC					brain	NA
SRR9007897		3318533845	1251	SINGLE	SAMN11570243	Apis_mellifera	RNA-Seq	cDNA	TRANSCRIPTOMIC					brain	NA
SRR9007898		3052356829	1156	SINGLE	SAMN11570242	Apis_mellifera	RNA-Seq	cDNA	TRANSCRIPTOMIC					brain	NA
SRR9007899		3294745634	1258	SINGLE	SAMN11570241	Apis_mellifera	RNA-Seq	cDNA	TRANSCRIPTOMIC					brain	NA
SRR9007900		3086072505	1176	SINGLE	SAMN11570240	Apis_mellifera	RNA-Seq	cDNA	TRANSCRIPTOMIC					brain	NA
SRR9007901		2921181518	1114	SINGLE	SAMN11570239	Apis_mellifera	RNA-Seq	cDNA	TRANSCRIPTOMIC					brain	NA
SRR9007902		3608701350	1370	SINGLE	SAMN11570238	Apis_mellifera	RNA-Seq	cDNA	TRANSCRIPTOMIC					brain	NA
SRR9007903		3299317779	1251	SINGLE	SAMN11570237	Apis_mellifera	RNA-Seq	cDNA	TRANSCRIPTOMIC					brain	NA
SRR9007904		3322868702	1257	SINGLE	SAMN11570236	Apis_mellifera	RNA-Seq	cDNA	TRANSCRIPTOMIC					brain	NA
SRR9007905		3437321403	1305	SINGLE	SAMN11570235	Apis_mellifera	RNA-Seq	cDNA	TRANSCRIPTOMIC					brain	NA
SRR9007906		2865368105	1078	SINGLE	SAMN11570234	Apis_mellifera	RNA-Seq	cDNA	TRANSCRIPTOMIC					brain	NA
SRR9007907		3194234320	1210	SINGLE	SAMN11570233	Apis_mellifera	RNA-Seq	cDNA	TRANSCRIPTOMIC					brain	NA
SRR9007908		2990387029	1133	SINGLE	SAMN11570232	Apis_mellifera	RNA-Seq	cDNA	TRANSCRIPTOMIC					brain	NA
SRR9007909		3009860984	1137	SINGLE	SAMN11570231	Apis_mellifera	RNA-Seq	cDNA	TRANSCRIPTOMIC					brain	NA
SRR9007910		2946551523	1135	SINGLE	SAMN11570230	Apis_mellifera	RNA-Seq	cDNA	TRANSCRIPTOMIC					brain	NA
SRR9007911		2734362276	1043	SINGLE	SAMN11570229	Apis_mellifera	RNA-Seq	cDNA	TRANSCRIPTOMIC					brain	NA
SRR9007912		3921348455	1492	SINGLE	SAMN11570066	Apis_mellifera	RNA-Seq	cDNA	TRANSCRIPTOMIC					brain	NA
SRR9007913		2984920772	1156	SINGLE	SAMN11570065	Apis_mellifera	RNA-Seq	cDNA	TRANSCRIPTOMIC					brain	NA
SRR9007914		3600737023	1358	SINGLE	SAMN11570064	Apis_mellifera	RNA-Seq	cDNA	TRANSCRIPTOMIC					brain	NA
SRR9007915		3739027995	1413	SINGLE	SAMN11570063	Apis_mellifera	RNA-Seq	cDNA	TRANSCRIPTOMIC					brain	NA
SRR9007916		2790378993	1052	SINGLE	SAMN11570062	Apis_mellifera	RNA-Seq	cDNA	TRANSCRIPTOMIC					brain	NA
SRR9007917		2889921936	1099	SINGLE	SAMN11570061	Apis_mellifera	RNA-Seq	cDNA	TRANSCRIPTOMIC					brain	NA
SRR9007918		3265596055	1235	SINGLE	SAMN11570262	Apis_mellifera	RNA-Seq	cDNA	TRANSCRIPTOMIC					brain	NA
SRR9007919		2880403901	1093	SINGLE	SAMN11570261	Apis_mellifera	RNA-Seq	cDNA	TRANSCRIPTOMIC					brain	NA
SRR9007920		3182312977	1209	SINGLE	SAMN11570260	Apis_mellifera	RNA-Seq	cDNA	TRANSCRIPTOMIC					brain	NA
SRR9007921		2953246576	1122	SINGLE	SAMN11570259	Apis_mellifera	RNA-Seq	cDNA	TRANSCRIPTOMIC					brain	NA
SRR9007922		3000434668	1159	SINGLE	SAMN11570258	Apis_mellifera	RNA-Seq	cDNA	TRANSCRIPTOMIC					brain	NA
SRR9007923		3138927476	1178	SINGLE	SAMN11570257	Apis_mellifera	RNA-Seq	cDNA	TRANSCRIPTOMIC					brain	NA
SRR9007928		9551164800	6045	PAIRED	SAMN11570337	Apis_mellifera	RNA-Seq	cDNA	TRANSCRIPTOMIC					mushroom bodies	NA
SRR9007929		6249631200	3783	PAIRED	SAMN11570374	Apis_mellifera	RNA-Seq	cDNA	TRANSCRIPTOMIC					mushroom bodies	NA
SRR9007930		8119804800	5229	PAIRED	SAMN11570368	Apis_mellifera	RNA-Seq	cDNA	TRANSCRIPTOMIC					mushroom bodies	NA
SRR9007931		5309209000	3255	PAIRED	SAMN11570373	Apis_mellifera	RNA-Seq	cDNA	TRANSCRIPTOMIC					mushroom bodies	NA
SRR9007932		5780753000	3548	PAIRED	SAMN11570372	Apis_mellifera	RNA-Seq	cDNA	TRANSCRIPTOMIC					mushroom bodies	NA
SRR9007933		4839367000	2935	PAIRED	SAMN11570371	Apis_mellifera	RNA-Seq	cDNA	TRANSCRIPTOMIC					mushroom bodies	NA
SRR9007934		4733798200	2924	PAIRED	SAMN11570370	Apis_mellifera	RNA-Seq	cDNA	TRANSCRIPTOMIC					mushroom bodies	NA
SRR9007935		4729392800	2882	PAIRED	SAMN11570369	Apis_mellifera	RNA-Seq	cDNA	TRANSCRIPTOMIC					mushroom bodies	NA
SRR9007936		5637794200	3406	PAIRED	SAMN11570367	Apis_mellifera	RNA-Seq	cDNA	TRANSCRIPTOMIC					mushroom bodies	NA
SRR9007937		6146274400	3776	PAIRED	SAMN11570366	Apis_mellifera	RNA-Seq	cDNA	TRANSCRIPTOMIC					mushroom bodies	NA
SRR9007938		9197415800	5893	PAIRED	SAMN11570365	Apis_mellifera	RNA-Seq	cDNA	TRANSCRIPTOMIC					mushroom bodies	NA
SRR9007939		6667556200	4040	PAIRED	SAMN11570364	Apis_mellifera	RNA-Seq	cDNA	TRANSCRIPTOMIC					mushroom bodies	NA
SRR9007940		9000785800	5794	PAIRED	SAMN11570363	Apis_mellifera	RNA-Seq	cDNA	TRANSCRIPTOMIC					mushroom bodies	NA
SRR9007941		7806002600	4762	PAIRED	SAMN11570362	Apis_mellifera	RNA-Seq	cDNA	TRANSCRIPTOMIC					mushroom bodies	NA
SRR9007942		5255808800	3126	PAIRED	SAMN11570361	Apis_mellifera	RNA-Seq	cDNA	TRANSCRIPTOMIC					mushroom bodies	NA
SRR9007828		3123302320	1183	SINGLE	SAMN11570060	Apis_mellifera	RNA-Seq	cDNA	TRANSCRIPTOMIC					brain	NA
SRR9007829		3459490875	1314	SINGLE	SAMN11570059	Apis_mellifera	RNA-Seq	cDNA	TRANSCRIPTOMIC					brain	NA
SRR9007830		2917223032	1134	SINGLE	SAMN11570290	Apis_mellifera	RNA-Seq	cDNA	TRANSCRIPTOMIC					brain	NA
SRR9007831		3067644918	1167	SINGLE	SAMN11570289	Apis_mellifera	RNA-Seq	cDNA	TRANSCRIPTOMIC					brain	NA
SRR9007832		3505242561	1316	SINGLE	SAMN11570288	Apis_mellifera	RNA-Seq	cDNA	TRANSCRIPTOMIC					brain	NA
SRR9007833		3354282607	1285	SINGLE	SAMN11570287	Apis_mellifera	RNA-Seq	cDNA	TRANSCRIPTOMIC					brain	NA
SRR9007834		3327428358	1250	SINGLE	SAMN11570286	Apis_mellifera	RNA-Seq	cDNA	TRANSCRIPTOMIC					brain	NA
SRR9007835		3097347751	1159	SINGLE	SAMN11570285	Apis_mellifera	RNA-Seq	cDNA	TRANSCRIPTOMIC					brain	NA
SRR9007836		3115278086	1184	SINGLE	SAMN11570284	Apis_mellifera	RNA-Seq	cDNA	TRANSCRIPTOMIC					brain	NA
SRR9007837		3023346206	1146	SINGLE	SAMN11570283	Apis_mellifera	RNA-Seq	cDNA	TRANSCRIPTOMIC					brain	NA
SRR9007838		3068642357	1163	SINGLE	SAMN11570282	Apis_mellifera	RNA-Seq	cDNA	TRANSCRIPTOMIC					brain	NA
SRR9007839		3041604364	1171	SINGLE	SAMN11570281	Apis_mellifera	RNA-Seq	cDNA	TRANSCRIPTOMIC					brain	NA
SRR9007840		3139605641	1195	SINGLE	SAMN11570280	Apis_mellifera	RNA-Seq	cDNA	TRANSCRIPTOMIC					brain	NA
SRR9007841		3072730438	1162	SINGLE	SAMN11570279	Apis_mellifera	RNA-Seq	cDNA	TRANSCRIPTOMIC					brain	NA
SRR9007842		4135667643	1564	SINGLE	SAMN11570278	Apis_mellifera	RNA-Seq	cDNA	TRANSCRIPTOMIC					brain	NA
SRR9007843		3129149787	1185	SINGLE	SAMN11570277	Apis_mellifera	RNA-Seq	cDNA	TRANSCRIPTOMIC					brain	NA
SRR9007844		3061083742	1172	SINGLE	SAMN11570276	Apis_mellifera	RNA-Seq	cDNA	TRANSCRIPTOMIC					brain	NA
SRR9007845		3492149445	1318	SINGLE	SAMN11570275	Apis_mellifera	RNA-Seq	cDNA	TRANSCRIPTOMIC					brain	NA
SRR9007846		3429890458	1305	SINGLE	SAMN11570274	Apis_mellifera	RNA-Seq	cDNA	TRANSCRIPTOMIC					brain	NA
SRR9007847		2990749032	1137	SINGLE	SAMN11570273	Apis_mellifera	RNA-Seq	cDNA	TRANSCRIPTOMIC					brain	NA
SRR9007848		3142179517	1187	SINGLE	SAMN11570272	Apis_mellifera	RNA-Seq	cDNA	TRANSCRIPTOMIC					brain	NA
SRR9007849		3139124548	1191	SINGLE	SAMN11570271	Apis_mellifera	RNA-Seq	cDNA	TRANSCRIPTOMIC					brain	NA
SRR9007850		3164375713	1204	SINGLE	SAMN11570270	Apis_mellifera	RNA-Seq	cDNA	TRANSCRIPTOMIC					brain	NA
SRR9007851		2811341006	1065	SINGLE	SAMN11570269	Apis_mellifera	RNA-Seq	cDNA	TRANSCRIPTOMIC					brain	NA
SRR9007852		3272960521	1241	SINGLE	SAMN11570268	Apis_mellifera	RNA-Seq	cDNA	TRANSCRIPTOMIC					brain	NA
SRR9007853		3859215820	1467	SINGLE	SAMN11570267	Apis_mellifera	RNA-Seq	cDNA	TRANSCRIPTOMIC					brain	NA
SRR9007854		3657210534	1380	SINGLE	SAMN11570266	Apis_mellifera	RNA-Seq	cDNA	TRANSCRIPTOMIC					brain	NA
SRR9007855		3285123330	1255	SINGLE	SAMN11570265	Apis_mellifera	RNA-Seq	cDNA	TRANSCRIPTOMIC					brain	NA
SRR9007856		3255508659	1229	SINGLE	SAMN11570264	Apis_mellifera	RNA-Seq	cDNA	TRANSCRIPTOMIC					brain	NA
SRR9007857		3143565067	1191	SINGLE	SAMN11570263	Apis_mellifera	RNA-Seq	cDNA	TRANSCRIPTOMIC					brain	NA
SRR9007858		3256125791	1238	SINGLE	SAMN11570320	Apis_mellifera	RNA-Seq	cDNA	TRANSCRIPTOMIC					brain	NA
SRR9007859		3068742276	1163	SINGLE	SAMN11570319	Apis_mellifera	RNA-Seq	cDNA	TRANSCRIPTOMIC					brain	NA
SRR9007860		3655199497	1384	SINGLE	SAMN11570318	Apis_mellifera	RNA-Seq	cDNA	TRANSCRIPTOMIC					brain	NA
SRR9007861		2970615612	1133	SINGLE	SAMN11570317	Apis_mellifera	RNA-Seq	cDNA	TRANSCRIPTOMIC					brain	NA
SRR9007862		3191320280	1221	SINGLE	SAMN11570316	Apis_mellifera	RNA-Seq	cDNA	TRANSCRIPTOMIC					brain	NA
SRR9007863		3069294357	1171	SINGLE	SAMN11570315	Apis_mellifera	RNA-Seq	cDNA	TRANSCRIPTOMIC					brain	NA
SRR9007864		3088174214	1175	SINGLE	SAMN11570314	Apis_mellifera	RNA-Seq	cDNA	TRANSCRIPTOMIC					brain	NA
SRR9007865		3565517477	1360	SINGLE	SAMN11570313	Apis_mellifera	RNA-Seq	cDNA	TRANSCRIPTOMIC					brain	NA
SRR9007866		3149478784	1186	SINGLE	SAMN11570312	Apis_mellifera	RNA-Seq	cDNA	TRANSCRIPTOMIC					brain	NA
SRR9007867		3063165559	1164	SINGLE	SAMN11570311	Apis_mellifera	RNA-Seq	cDNA	TRANSCRIPTOMIC					brain	NA
SRR9007868		3384546861	1283	SINGLE	SAMN11570310	Apis_mellifera	RNA-Seq	cDNA	TRANSCRIPTOMIC					brain	NA
SRR9007869		3058013676	1191	SINGLE	SAMN11570309	Apis_mellifera	RNA-Seq	cDNA	TRANSCRIPTOMIC					brain	NA
SRR9007870		3088845987	1178	SINGLE	SAMN11570355	Apis_mellifera	RNA-Seq	cDNA	TRANSCRIPTOMIC					brain	NA
SRR9007871		2982061849	1127	SINGLE	SAMN11570354	Apis_mellifera	RNA-Seq	cDNA	TRANSCRIPTOMIC					brain	NA
SRR9007872		3366008088	1298	SINGLE	SAMN11570353	Apis_mellifera	RNA-Seq	cDNA	TRANSCRIPTOMIC					brain	NA
SRR9007873		3035004271	1176	SINGLE	SAMN11570348	Apis_mellifera	RNA-Seq	cDNA	TRANSCRIPTOMIC					brain	NA
SRR9007874		3289362476	1251	SINGLE	SAMN11570347	Apis_mellifera	RNA-Seq	cDNA	TRANSCRIPTOMIC					brain	NA
SRR9007875		3179933818	1208	SINGLE	SAMN11570346	Apis_mellifera	RNA-Seq	cDNA	TRANSCRIPTOMIC					brain	NA
SRR9007876		3319821578	1264	SINGLE	SAMN11570352	Apis_mellifera	RNA-Seq	cDNA	TRANSCRIPTOMIC					brain	NA
SRR9007877		3617820520	1374	SINGLE	SAMN11570351	Apis_mellifera	RNA-Seq	cDNA	TRANSCRIPTOMIC					brain	NA
SRR9007878		2900126593	1103	SINGLE	SAMN11570350	Apis_mellifera	RNA-Seq	cDNA	TRANSCRIPTOMIC					brain	NA
SRR8867393		3591789876	2341	PAIRED	SAMN11368527	Apis_mellifera	RNA-Seq	cDNA	TRANSCRIPTOMIC					whole bodies	adult
SRR8867392		2794877454	1864	PAIRED	SAMN11368528	Apis_mellifera	RNA-Seq	cDNA	TRANSCRIPTOMIC					whole bodies	adult
SRR8867395		2475425766	1608	PAIRED	SAMN11368529	Apis_mellifera	RNA-Seq	cDNA	TRANSCRIPTOMIC					whole bodies	adult
SRR8867394		4775100624	3139	PAIRED	SAMN11368530	Apis_mellifera	RNA-Seq	cDNA	TRANSCRIPTOMIC					whole bodies	adult
SRR8823604		2796693600	831	PAIRED	SAMN11298896	Apis_mellifera	RNA-Seq	PCR	TRANSCRIPTOMIC	female				head and thorax	newly emerged queen
SRR8823603		3405245700	999	PAIRED	SAMN11298897	Apis_mellifera	RNA-Seq	PCR	TRANSCRIPTOMIC	female				head and thorax	newly emerged queen
SRR8769532		25156271726	8474	PAIRED	SAMN11233117	Apis_mellifera	RNA-Seq	RANDOM	TRANSCRIPTOMIC					Head	NA
SRR8769541		20659227174	6842	PAIRED	SAMN11233118	Apis_mellifera	RNA-Seq	RANDOM	TRANSCRIPTOMIC					Head	NA
SRR8769542		28108121500	9251	PAIRED	SAMN11233119	Apis_mellifera	RNA-Seq	RANDOM	TRANSCRIPTOMIC					Head	NA
SRR8769535		27580817420	9139	PAIRED	SAMN11233114	Apis_mellifera	RNA-Seq	RANDOM	TRANSCRIPTOMIC					Head	NA
SRR8769536		14628054936	4747	PAIRED	SAMN11233115	Apis_mellifera	RNA-Seq	RANDOM	TRANSCRIPTOMIC					Head	NA
SRR8769531		28644862476	9774	PAIRED	SAMN11233116	Apis_mellifera	RNA-Seq	RANDOM	TRANSCRIPTOMIC					Head	NA
SRR8769540		22783776034	7652	PAIRED	SAMN11233111	Apis_mellifera	RNA-Seq	RANDOM	TRANSCRIPTOMIC					Head	NA
SRR8769533		21465898770	7196	PAIRED	SAMN11233112	Apis_mellifera	RNA-Seq	RANDOM	TRANSCRIPTOMIC					Head	NA
SRR8769534		18518689830	6211	PAIRED	SAMN11233113	Apis_mellifera	RNA-Seq	RANDOM	TRANSCRIPTOMIC					Head	NA
SRR8769537		20725279104	7030	PAIRED	SAMN11233108	Apis_mellifera	RNA-Seq	RANDOM	TRANSCRIPTOMIC					Head	NA
SRR8769538		20836058744	7030	PAIRED	SAMN11233109	Apis_mellifera	RNA-Seq	RANDOM	TRANSCRIPTOMIC					Head	NA
SRR8769539		20593145044	6870	PAIRED	SAMN11233110	Apis_mellifera	RNA-Seq	RANDOM	TRANSCRIPTOMIC					Head	NA
SRR8823608		3417905700	1014	PAIRED	SAMN11298892	Apis_mellifera	RNA-Seq	PCR	TRANSCRIPTOMIC	female				head and thorax	newly emerged queen
SRR8823607		2966622600	886	PAIRED	SAMN11298893	Apis_mellifera	RNA-Seq	PCR	TRANSCRIPTOMIC	female				head and thorax	newly emerged queen
SRR8823606		3226932300	968	PAIRED	SAMN11298894	Apis_mellifera	RNA-Seq	PCR	TRANSCRIPTOMIC	female				head and thorax	newly emerged queen
SRR8823605		3066978000	921	PAIRED	SAMN11298895	Apis_mellifera	RNA-Seq	PCR	TRANSCRIPTOMIC	female				head and thorax	newly emerged queen
SRR8769543		17201936308	5678	PAIRED	SAMN11233120	Apis_mellifera	RNA-Seq	RANDOM	TRANSCRIPTOMIC					Head	NA
SRR8769544		19267516346	6471	PAIRED	SAMN11233121	Apis_mellifera	RNA-Seq	RANDOM	TRANSCRIPTOMIC					Head	NA
SRR8769545		15292481512	5068	PAIRED	SAMN11233122	Apis_mellifera	RNA-Seq	RANDOM	TRANSCRIPTOMIC					Head	NA
SRR8754014		3423562629	1360	SINGLE	SAMN11173093	Apis_mellifera	RNA-Seq	PolyA	TRANSCRIPTOMIC					Mushroom Bodies of brain	NA
SRR8754013		3013692918	1199	SINGLE	SAMN11173094	Apis_mellifera	RNA-Seq	PolyA	TRANSCRIPTOMIC					Mushroom Bodies of brain	NA
SRR8754008		3939341388	1564	SINGLE	SAMN11173095	Apis_mellifera	RNA-Seq	PolyA	TRANSCRIPTOMIC					Mushroom Bodies of brain	NA
SRR8754005		3669068214	1460	SINGLE	SAMN11173096	Apis_mellifera	RNA-Seq	PolyA	TRANSCRIPTOMIC					Mushroom Bodies of brain	NA
SRR8754006		2735930343	1089	SINGLE	SAMN11173097	Apis_mellifera	RNA-Seq	PolyA	TRANSCRIPTOMIC					Mushroom Bodies of brain	NA
SRR8754004		3262930377	1281	SINGLE	SAMN11173098	Apis_mellifera	RNA-Seq	PolyA	TRANSCRIPTOMIC					Mushroom Bodies of brain	NA
SRR3050618		470400000	320	SINGLE	SAMN04364425	Apis_mellifera	miRNA-Seq	size fractionation	TRANSCRIPTOMIC					NA	NA
SRR3050619		672155540	444	SINGLE	SAMN04364426	Apis_mellifera	miRNA-Seq	size fractionation	TRANSCRIPTOMIC					NA	NA
SRR3050620		470400000	315	SINGLE	SAMN04364427	Apis_mellifera	miRNA-Seq	size fractionation	TRANSCRIPTOMIC					NA	NA
SRR3050621		470400000	311	SINGLE	SAMN04364428	Apis_mellifera	miRNA-Seq	size fractionation	TRANSCRIPTOMIC					NA	NA
SRR8754038		3405837600	2217	PAIRED	SAMN09764238	Apis_mellifera	RNA-Seq	RANDOM	TRANSCRIPTOMIC					Whole adult female	NA
SRR8754039		2908985400	1897	PAIRED	SAMN10232644	Apis_mellifera	RNA-Seq	RANDOM	TRANSCRIPTOMIC					Whole adult female	NA
SRR8754036		3315691600	2157	PAIRED	SAMN10232646	Apis_mellifera	RNA-Seq	RANDOM	TRANSCRIPTOMIC					Whole adult female	NA
SRR8754037		3057084600	2008	PAIRED	SAMN10232647	Apis_mellifera	RNA-Seq	RANDOM	TRANSCRIPTOMIC					Whole adult female	NA
SRR8754042		4252332000	2786	PAIRED	SAMN10232649	Apis_mellifera	RNA-Seq	RANDOM	TRANSCRIPTOMIC					Whole adult female	NA
SRR8754043		2642743400	1729	PAIRED	SAMN10232683	Apis_mellifera	RNA-Seq	RANDOM	TRANSCRIPTOMIC					Whole adult female	NA
SRR8754040		2498182400	1633	PAIRED	SAMN10232687	Apis_mellifera	RNA-Seq	RANDOM	TRANSCRIPTOMIC					Whole adult female	NA
SRR8754041		2131287000	1389	PAIRED	SAMN10232688	Apis_mellifera	RNA-Seq	RANDOM	TRANSCRIPTOMIC					Whole adult female	NA
SRR8754044		2060132600	1348	PAIRED	SAMN10232685	Apis_mellifera	RNA-Seq	RANDOM	TRANSCRIPTOMIC					Whole adult female	NA
SRR8754034		3197906400	2080	PAIRED	SAMN10232721	Apis_mellifera	RNA-Seq	RANDOM	TRANSCRIPTOMIC					Whole adult female	NA
SRR8754035		3740936200	2437	PAIRED	SAMN10232720	Apis_mellifera	RNA-Seq	RANDOM	TRANSCRIPTOMIC					Whole adult female	NA
SRR8754049		2923777000	1902	PAIRED	SAMN10232722	Apis_mellifera	RNA-Seq	RANDOM	TRANSCRIPTOMIC					Whole adult female	NA
SRR8754048		3184202000	2078	PAIRED	SAMN10232723	Apis_mellifera	RNA-Seq	RANDOM	TRANSCRIPTOMIC					Whole adult female	NA
SRR8754047		2098236000	1369	PAIRED	SAMN10232821	Apis_mellifera	RNA-Seq	RANDOM	TRANSCRIPTOMIC					Whole adult female	NA
SRR8754046		2370027800	1550	PAIRED	SAMN10232724	Apis_mellifera	RNA-Seq	RANDOM	TRANSCRIPTOMIC					Whole adult female	NA
SRR8754052		2752229400	1797	PAIRED	SAMN10232822	Apis_mellifera	RNA-Seq	RANDOM	TRANSCRIPTOMIC					Whole adult female	NA
SRR8754051		2854133600	1874	PAIRED	SAMN10232824	Apis_mellifera	RNA-Seq	RANDOM	TRANSCRIPTOMIC					Whole adult female	NA
SRR8754050		2936266400	1927	PAIRED	SAMN10232823	Apis_mellifera	RNA-Seq	RANDOM	TRANSCRIPTOMIC					Whole adult female	NA
SRR8754045		2990195800	1955	PAIRED	SAMN10232691	Apis_mellifera	RNA-Seq	RANDOM	TRANSCRIPTOMIC					Whole adult female	NA
SRR8754028		2931890600	1911	PAIRED	SAMN10232711	Apis_mellifera	RNA-Seq	RANDOM	TRANSCRIPTOMIC					Whole adult female	NA
SRR8754029		2921222600	1904	PAIRED	SAMN10232710	Apis_mellifera	RNA-Seq	RANDOM	TRANSCRIPTOMIC					Whole adult female	NA
SRR8754026		2905397000	1897	PAIRED	SAMN10232712	Apis_mellifera	RNA-Seq	RANDOM	TRANSCRIPTOMIC					Whole adult female	NA
SRR8754027		3495106000	2285	PAIRED	SAMN10232713	Apis_mellifera	RNA-Seq	RANDOM	TRANSCRIPTOMIC					Whole adult female	NA
SRR8754032		3296212400	2146	PAIRED	SAMN10232715	Apis_mellifera	RNA-Seq	RANDOM	TRANSCRIPTOMIC					Whole adult female	NA
SRR8754033		3556997200	2318	PAIRED	SAMN10232714	Apis_mellifera	RNA-Seq	RANDOM	TRANSCRIPTOMIC					Whole adult female	NA
SRR8754030		3263489600	2127	PAIRED	SAMN10232716	Apis_mellifera	RNA-Seq	RANDOM	TRANSCRIPTOMIC					Whole adult female	NA
SRR8754031		3689935600	2412	PAIRED	SAMN10232717	Apis_mellifera	RNA-Seq	RANDOM	TRANSCRIPTOMIC					Whole adult female	NA
SRR8754018		2705410617	1066	SINGLE	SAMN11173099	Apis_mellifera	RNA-Seq	PolyA	TRANSCRIPTOMIC					Mushroom Bodies of brain	NA
SRR8754017		3814666482	1512	SINGLE	SAMN11173100	Apis_mellifera	RNA-Seq	PolyA	TRANSCRIPTOMIC					Mushroom Bodies of brain	NA
SRR8754020		2979212175	1172	SINGLE	SAMN11173101	Apis_mellifera	RNA-Seq	PolyA	TRANSCRIPTOMIC					Mushroom Bodies of brain	NA
SRR8754007		2876693199	1137	SINGLE	SAMN11173102	Apis_mellifera	RNA-Seq	PolyA	TRANSCRIPTOMIC					Mushroom Bodies of brain	NA
SRR8754016		3289011216	1291	SINGLE	SAMN11173103	Apis_mellifera	RNA-Seq	PolyA	TRANSCRIPTOMIC					Mushroom Bodies of brain	NA
SRR8754015		3339427674	1323	SINGLE	SAMN11173104	Apis_mellifera	RNA-Seq	PolyA	TRANSCRIPTOMIC					Mushroom Bodies of brain	NA
SRR8754003		3713573262	1464	SINGLE	SAMN11173105	Apis_mellifera	RNA-Seq	PolyA	TRANSCRIPTOMIC					Mushroom Bodies of brain	NA
SRR8754019		4631664756	1819	SINGLE	SAMN11173106	Apis_mellifera	RNA-Seq	PolyA	TRANSCRIPTOMIC					Mushroom Bodies of brain	NA
SRR8754012		3564835638	1409	SINGLE	SAMN11173107	Apis_mellifera	RNA-Seq	PolyA	TRANSCRIPTOMIC					Mushroom Bodies of brain	NA
SRR8754011		2106803217	831	SINGLE	SAMN11173108	Apis_mellifera	RNA-Seq	PolyA	TRANSCRIPTOMIC					Mushroom Bodies of brain	NA
SRR8754010		2495861103	981	SINGLE	SAMN11173109	Apis_mellifera	RNA-Seq	PolyA	TRANSCRIPTOMIC					Mushroom Bodies of brain	NA
SRR8754009		4826749854	1896	SINGLE	SAMN11173110	Apis_mellifera	RNA-Seq	PolyA	TRANSCRIPTOMIC					Mushroom Bodies of brain	NA
SRR8632761		5412080619	3549	SINGLE	SAMN11022148	Apis_mellifera	RNA-Seq	cDNA	TRANSCRIPTOMIC					Brain	NA
SRR8632762		4695629213	3119	SINGLE	SAMN11022147	Apis_mellifera	RNA-Seq	cDNA	TRANSCRIPTOMIC					Brain	NA
SRR8632763		6180272714	4070	SINGLE	SAMN11022146	Apis_mellifera	RNA-Seq	cDNA	TRANSCRIPTOMIC					Brain	NA
SRR8632764		8999434532	5755	SINGLE	SAMN11022145	Apis_mellifera	RNA-Seq	cDNA	TRANSCRIPTOMIC					Brain	NA
SRR8632765		8264755323	5280	SINGLE	SAMN11022144	Apis_mellifera	RNA-Seq	cDNA	TRANSCRIPTOMIC					Brain	NA
SRR8632766		6822974741	4588	SINGLE	SAMN11022143	Apis_mellifera	RNA-Seq	cDNA	TRANSCRIPTOMIC					Brain	NA
SRR8632767		7149034046	4816	SINGLE	SAMN11022142	Apis_mellifera	RNA-Seq	cDNA	TRANSCRIPTOMIC					Brain	NA
SRR8632768		6112913829	4107	SINGLE	SAMN11022141	Apis_mellifera	RNA-Seq	cDNA	TRANSCRIPTOMIC					Brain	NA
SRR8632769		6705938822	4514	SINGLE	SAMN11022140	Apis_mellifera	RNA-Seq	cDNA	TRANSCRIPTOMIC					Brain	NA
SRR8632770		5562846498	3633	SINGLE	SAMN11022139	Apis_mellifera	RNA-Seq	cDNA	TRANSCRIPTOMIC					Brain	NA
SRR8632771		6964558656	4544	SINGLE	SAMN11022138	Apis_mellifera	RNA-Seq	cDNA	TRANSCRIPTOMIC					Brain	NA
SRR8632772		6043909465	3956	SINGLE	SAMN11022137	Apis_mellifera	RNA-Seq	cDNA	TRANSCRIPTOMIC					Brain	NA
SRR8632773		5782601616	3783	SINGLE	SAMN11022136	Apis_mellifera	RNA-Seq	cDNA	TRANSCRIPTOMIC					Brain	NA
SRR8632774		6430266579	4181	SINGLE	SAMN11022135	Apis_mellifera	RNA-Seq	cDNA	TRANSCRIPTOMIC					Brain	NA
SRR8632775		7524618893	4898	SINGLE	SAMN11022134	Apis_mellifera	RNA-Seq	cDNA	TRANSCRIPTOMIC					Brain	NA
SRR8632776		5998185138	3929	SINGLE	SAMN11022133	Apis_mellifera	RNA-Seq	cDNA	TRANSCRIPTOMIC					Brain	NA
SRR8632777		6523260282	4250	SINGLE	SAMN11022132	Apis_mellifera	RNA-Seq	cDNA	TRANSCRIPTOMIC					Brain	NA
SRR8632778		7690141811	5033	SINGLE	SAMN11022131	Apis_mellifera	RNA-Seq	cDNA	TRANSCRIPTOMIC					Brain	NA
SRR8734356		12658394628	3898	PAIRED	SAMN11132198	Apis_mellifera	RNA-Seq	cDNA	TRANSCRIPTOMIC					midgut	NA
SRR8734357		11302303492	3469	PAIRED	SAMN11132197	Apis_mellifera	RNA-Seq	cDNA	TRANSCRIPTOMIC					midgut	NA
SRR8734358		14080849358	4320	PAIRED	SAMN11132196	Apis_mellifera	RNA-Seq	cDNA	TRANSCRIPTOMIC					midgut	NA
SRR8734359		11507848920	3528	PAIRED	SAMN11132195	Apis_mellifera	RNA-Seq	cDNA	TRANSCRIPTOMIC					midgut	NA
SRR8734360		16287662112	4956	PAIRED	SAMN11132246	Apis_mellifera	RNA-Seq	cDNA	TRANSCRIPTOMIC					midgut	NA
SRR8734361		11331079562	3460	PAIRED	SAMN11132245	Apis_mellifera	RNA-Seq	cDNA	TRANSCRIPTOMIC					midgut	NA
SRR8567919		2520236700	1048	PAIRED	SAMN10920307	Apis_mellifera	RNA-Seq	RANDOM	TRANSCRIPTOMIC					Head	NA
SRR8567924		2226642900	915	PAIRED	SAMN10920308	Apis_mellifera	RNA-Seq	RANDOM	TRANSCRIPTOMIC					Head	NA
SRR8567925		2463293400	1039	PAIRED	SAMN10920309	Apis_mellifera	RNA-Seq	RANDOM	TRANSCRIPTOMIC					Head	NA
SRR8567920		1869218400	741	PAIRED	SAMN10920304	Apis_mellifera	RNA-Seq	RANDOM	TRANSCRIPTOMIC					Head	NA
SRR8567921		2043933900	869	PAIRED	SAMN10920305	Apis_mellifera	RNA-Seq	RANDOM	TRANSCRIPTOMIC					Head	NA
SRR8567918		2488412700	1011	PAIRED	SAMN10920306	Apis_mellifera	RNA-Seq	RANDOM	TRANSCRIPTOMIC					Head	NA
SRR8567928		2627067300	1088	PAIRED	SAMN10920310	Apis_mellifera	RNA-Seq	RANDOM	TRANSCRIPTOMIC					Head	NA
SRR8567923		2632517400	1111	PAIRED	SAMN10920311	Apis_mellifera	RNA-Seq	RANDOM	TRANSCRIPTOMIC					Head	NA
SRR8567927		2252632800	903	PAIRED	SAMN10920313	Apis_mellifera	RNA-Seq	RANDOM	TRANSCRIPTOMIC					Head	NA
SRR8567894		2197936800	884	PAIRED	SAMN10920314	Apis_mellifera	RNA-Seq	RANDOM	TRANSCRIPTOMIC					Head	NA
SRR8567895		1660670400	678	PAIRED	SAMN10920315	Apis_mellifera	RNA-Seq	RANDOM	TRANSCRIPTOMIC					Head	NA
SRR8567892		1595241600	652	PAIRED	SAMN10920316	Apis_mellifera	RNA-Seq	RANDOM	TRANSCRIPTOMIC					Head	NA
SRR8567893		1836858000	755	PAIRED	SAMN10920317	Apis_mellifera	RNA-Seq	RANDOM	TRANSCRIPTOMIC					Head	NA
SRR8567898		1909575600	767	PAIRED	SAMN10920318	Apis_mellifera	RNA-Seq	RANDOM	TRANSCRIPTOMIC					Head	NA
SRR8567902		2824712400	1115	PAIRED	SAMN10920322	Apis_mellifera	RNA-Seq	RANDOM	TRANSCRIPTOMIC					Head	NA
SRR8567903		3078565500	1255	PAIRED	SAMN10920323	Apis_mellifera	RNA-Seq	RANDOM	TRANSCRIPTOMIC					Head	NA
SRR8567938		2801278500	1119	PAIRED	SAMN10920324	Apis_mellifera	RNA-Seq	RANDOM	TRANSCRIPTOMIC					Head	NA
SRR8567899		2919678300	1168	PAIRED	SAMN10920319	Apis_mellifera	RNA-Seq	RANDOM	TRANSCRIPTOMIC					Head	NA
SRR8567896		1626607200	666	PAIRED	SAMN10920320	Apis_mellifera	RNA-Seq	RANDOM	TRANSCRIPTOMIC					Head	NA
SRR8567897		3588384000	1461	PAIRED	SAMN10920321	Apis_mellifera	RNA-Seq	RANDOM	TRANSCRIPTOMIC					Head	NA
SRR8567937		3094309200	1218	PAIRED	SAMN10920325	Apis_mellifera	RNA-Seq	RANDOM	TRANSCRIPTOMIC					Head	NA
SRR8567936		3740637000	1517	PAIRED	SAMN10920326	Apis_mellifera	RNA-Seq	RANDOM	TRANSCRIPTOMIC					Head	NA
SRR8567935		2988178800	1210	PAIRED	SAMN10920327	Apis_mellifera	RNA-Seq	RANDOM	TRANSCRIPTOMIC					Head	NA
SRR8567942		3522726300	1437	PAIRED	SAMN10920328	Apis_mellifera	RNA-Seq	RANDOM	TRANSCRIPTOMIC					Head	NA
SRR8567941		2228543100	907	PAIRED	SAMN10920329	Apis_mellifera	RNA-Seq	RANDOM	TRANSCRIPTOMIC					Head	NA
SRR8567940		3682411200	1506	PAIRED	SAMN10920330	Apis_mellifera	RNA-Seq	RANDOM	TRANSCRIPTOMIC					Head	NA
SRR8567939		2522809500	1025	PAIRED	SAMN10920331	Apis_mellifera	RNA-Seq	RANDOM	TRANSCRIPTOMIC					Head	NA
SRR8567931		2986611300	1219	PAIRED	SAMN10920332	Apis_mellifera	RNA-Seq	RANDOM	TRANSCRIPTOMIC					Head	NA
SRR8567930		2877106200	1189	PAIRED	SAMN10920333	Apis_mellifera	RNA-Seq	RANDOM	TRANSCRIPTOMIC					Head	NA
SRR8567933		18721513030	6253	PAIRED	SAMN10920352	Apis_mellifera	RNA-Seq	RANDOM	TRANSCRIPTOMIC					Head	NA
SRR8567906		13427664128	4503	PAIRED	SAMN10920354	Apis_mellifera	RNA-Seq	RANDOM	TRANSCRIPTOMIC					Head	NA
SRR8567922		17148814810	5674	PAIRED	SAMN10920349	Apis_mellifera	RNA-Seq	RANDOM	TRANSCRIPTOMIC					Head	NA
SRR8567934		11969765470	4014	PAIRED	SAMN10920350	Apis_mellifera	RNA-Seq	RANDOM	TRANSCRIPTOMIC					Head	NA
SRR8567929		11668882266	3778	PAIRED	SAMN10920351	Apis_mellifera	RNA-Seq	RANDOM	TRANSCRIPTOMIC					Head	NA
SRR8567907		13097787716	4322	PAIRED	SAMN10920355	Apis_mellifera	RNA-Seq	RANDOM	TRANSCRIPTOMIC					Head	NA
SRR8567913		2953580838	1153	PAIRED	SAMN10920358	Apis_mellifera	RNA-Seq	RANDOM	TRANSCRIPTOMIC					Head	NA
SRR8567916		3157104678	1227	PAIRED	SAMN10920359	Apis_mellifera	RNA-Seq	RANDOM	TRANSCRIPTOMIC					Head	NA
SRR8567900		3368536388	1338	PAIRED	SAMN10920360	Apis_mellifera	RNA-Seq	RANDOM	TRANSCRIPTOMIC					Head	NA
SRR8567901		6725286622	2469	PAIRED	SAMN10920361	Apis_mellifera	RNA-Seq	RANDOM	TRANSCRIPTOMIC					Head	NA
SRR8567915		9116985588	3335	PAIRED	SAMN10920362	Apis_mellifera	RNA-Seq	RANDOM	TRANSCRIPTOMIC					Head	NA
SRR8567944		6518379174	2337	PAIRED	SAMN10920363	Apis_mellifera	RNA-Seq	RANDOM	TRANSCRIPTOMIC					Head	NA
SRR8567917		5700981300	2012	PAIRED	SAMN10920337	Apis_mellifera	RNA-Seq	RANDOM	TRANSCRIPTOMIC					Head	NA
SRR8567908		5368866300	1913	PAIRED	SAMN10920338	Apis_mellifera	RNA-Seq	RANDOM	TRANSCRIPTOMIC					Head	NA
SRR8567926		5662841400	2036	PAIRED	SAMN10920339	Apis_mellifera	RNA-Seq	RANDOM	TRANSCRIPTOMIC					Head	NA
SRR8567911		4696222200	1665	PAIRED	SAMN10920334	Apis_mellifera	RNA-Seq	RANDOM	TRANSCRIPTOMIC					Head	NA
SRR8567912		5020781100	1783	PAIRED	SAMN10920335	Apis_mellifera	RNA-Seq	RANDOM	TRANSCRIPTOMIC					Head	NA
SRR8567914		4681302600	1669	PAIRED	SAMN10920336	Apis_mellifera	RNA-Seq	RANDOM	TRANSCRIPTOMIC					Head	NA
SRR8567945		2965341900	1061	PAIRED	SAMN10920340	Apis_mellifera	RNA-Seq	RANDOM	TRANSCRIPTOMIC					Head	NA
SRR8567909		1843088400	693	PAIRED	SAMN10920341	Apis_mellifera	RNA-Seq	RANDOM	TRANSCRIPTOMIC					Head	NA
SRR8567904		1098921600	410	PAIRED	SAMN10920342	Apis_mellifera	RNA-Seq	RANDOM	TRANSCRIPTOMIC					Head	NA
SRR8567905		5477686800	1962	PAIRED	SAMN10920343	Apis_mellifera	RNA-Seq	RANDOM	TRANSCRIPTOMIC					Head	NA
SRR8567943		5258005500	1900	PAIRED	SAMN10920344	Apis_mellifera	RNA-Seq	RANDOM	TRANSCRIPTOMIC					Head	NA
SRR8567910		5848597800	2119	PAIRED	SAMN10920345	Apis_mellifera	RNA-Seq	RANDOM	TRANSCRIPTOMIC					Head	NA
SRR8567932		5246066700	1882	PAIRED	SAMN10920347	Apis_mellifera	RNA-Seq	RANDOM	TRANSCRIPTOMIC					Head	NA
SRR8567949		1827399000	782	PAIRED	SAMN10920312	Apis_mellifera	RNA-Seq	RANDOM	TRANSCRIPTOMIC					Head	NA
SRR8567948		12708913188	4296	PAIRED	SAMN10920353	Apis_mellifera	RNA-Seq	RANDOM	TRANSCRIPTOMIC					Head	NA
SRR8567947		11137053018	3658	PAIRED	SAMN10920356	Apis_mellifera	RNA-Seq	RANDOM	TRANSCRIPTOMIC					Head	NA
SRR8567951		13272579880	4365	PAIRED	SAMN10920357	Apis_mellifera	RNA-Seq	RANDOM	TRANSCRIPTOMIC					Head	NA
SRR8567946		5392409700	1964	PAIRED	SAMN10920346	Apis_mellifera	RNA-Seq	RANDOM	TRANSCRIPTOMIC					Head	NA
SRR8567950		5152549200	1866	PAIRED	SAMN10920348	Apis_mellifera	RNA-Seq	RANDOM	TRANSCRIPTOMIC					Head	NA
SRR8297880		3169114200	1091	SINGLE	SAMN10578723	Apis_mellifera	RNA-Seq	unspecified	TRANSCRIPTOMIC	male				brain	not applicable
SRR8297881		3393372654	1145	SINGLE	SAMN10578724	Apis_mellifera	RNA-Seq	unspecified	TRANSCRIPTOMIC	male				brain	not applicable
SRR8297882		3925313280	1332	SINGLE	SAMN10578729	Apis_mellifera	RNA-Seq	unspecified	TRANSCRIPTOMIC	male				brain	not applicable
SRR8297883		1505210112	507	SINGLE	SAMN10578730	Apis_mellifera	RNA-Seq	unspecified	TRANSCRIPTOMIC	male				brain	not applicable
SRR8335305		4211506200	1684	PAIRED	SAMN10605948	Apis_mellifera	RNA-Seq	cDNA	TRANSCRIPTOMIC					Apis mellifera rectum	NA
SRR8335306		4093955700	1619	PAIRED	SAMN10605949	Apis_mellifera	RNA-Seq	cDNA	TRANSCRIPTOMIC					Apis mellifera rectum	NA
SRR8335311		4180028100	1667	PAIRED	SAMN10605950	Apis_mellifera	RNA-Seq	cDNA	TRANSCRIPTOMIC					Apis mellifera rectum	NA
SRR8335312		4097487300	1666	PAIRED	SAMN10605951	Apis_mellifera	RNA-Seq	cDNA	TRANSCRIPTOMIC					Apis mellifera rectum	NA
SRR8335309		4181038500	1683	PAIRED	SAMN10605952	Apis_mellifera	RNA-Seq	cDNA	TRANSCRIPTOMIC					Apis mellifera rectum	NA
SRR8335310		4160282700	1678	PAIRED	SAMN10605953	Apis_mellifera	RNA-Seq	cDNA	TRANSCRIPTOMIC					Apis mellifera rectum	NA
SRR8335307		4400510600	1533	PAIRED	SAMN10605946	Apis_mellifera	RNA-Seq	cDNA	TRANSCRIPTOMIC					Apis mellifera rectum	NA
SRR8335308		4370251200	1529	PAIRED	SAMN10605947	Apis_mellifera	RNA-Seq	cDNA	TRANSCRIPTOMIC					Apis mellifera rectum	NA
SRR8335256		8370471000	2587	PAIRED	SAMN10606944	Apis_mellifera	RNA-Seq	RANDOM	TRANSCRIPTOMIC	female				whole body	NA
SRR8335255		8674836600	2672	PAIRED	SAMN10606945	Apis_mellifera	RNA-Seq	RANDOM	TRANSCRIPTOMIC	female				whole body	NA
SRR8335258		9229045800	2647	PAIRED	SAMN10606946	Apis_mellifera	RNA-Seq	RANDOM	TRANSCRIPTOMIC	female				whole body	NA
SRR8335257		8215860000	2583	PAIRED	SAMN10606947	Apis_mellifera	RNA-Seq	RANDOM	TRANSCRIPTOMIC	female				whole body	NA
SRR8297886		3036575430	1025	SINGLE	SAMN10578719	Apis_mellifera	RNA-Seq	unspecified	TRANSCRIPTOMIC	male				brain	not applicable
SRR8297887		7703921988	2597	SINGLE	SAMN10578720	Apis_mellifera	RNA-Seq	unspecified	TRANSCRIPTOMIC	male				brain	not applicable
SRR8297888		3877047720	1310	SINGLE	SAMN10578721	Apis_mellifera	RNA-Seq	unspecified	TRANSCRIPTOMIC	male				brain	not applicable
SRR8297889		2753719668	923	SINGLE	SAMN10578722	Apis_mellifera	RNA-Seq	unspecified	TRANSCRIPTOMIC	male				brain	not applicable
SRR8297884		3705877476	1251	SINGLE	SAMN10578725	Apis_mellifera	RNA-Seq	unspecified	TRANSCRIPTOMIC	male				brain	not applicable
SRR8297885		3721299624	1251	SINGLE	SAMN10578726	Apis_mellifera	RNA-Seq	unspecified	TRANSCRIPTOMIC	male				brain	not applicable
SRR8297890		2898808794	980	SINGLE	SAMN10578727	Apis_mellifera	RNA-Seq	unspecified	TRANSCRIPTOMIC	male				brain	not applicable
SRR8297891		2869419924	968	SINGLE	SAMN10578728	Apis_mellifera	RNA-Seq	unspecified	TRANSCRIPTOMIC	male				brain	not applicable
SRR8121077		782909100	402	SINGLE	SAMN10338905	Apis_mellifera	RNA-Seq	cDNA	TRANSCRIPTOMIC					Whole body	NA
SRR8121078		798584900	404	SINGLE	SAMN10338905	Apis_mellifera	RNA-Seq	cDNA	TRANSCRIPTOMIC					Whole body	NA
SRR8121079		699926600	359	SINGLE	SAMN10338928	Apis_mellifera	RNA-Seq	cDNA	TRANSCRIPTOMIC					Whole body	NA
SRR8121080		712284600	360	SINGLE	SAMN10338928	Apis_mellifera	RNA-Seq	cDNA	TRANSCRIPTOMIC					Whole body	NA
SRR8121081		738154600	382	SINGLE	SAMN10338927	Apis_mellifera	RNA-Seq	cDNA	TRANSCRIPTOMIC					Whole body	NA
SRR8121082		751870400	383	SINGLE	SAMN10338927	Apis_mellifera	RNA-Seq	cDNA	TRANSCRIPTOMIC					Whole body	NA
SRR8121083		662327800	343	SINGLE	SAMN10338926	Apis_mellifera	RNA-Seq	cDNA	TRANSCRIPTOMIC					Whole body	NA
SRR8121084		675739400	344	SINGLE	SAMN10338926	Apis_mellifera	RNA-Seq	cDNA	TRANSCRIPTOMIC					Whole body	NA
SRR8121085		571337900	290	SINGLE	SAMN10338925	Apis_mellifera	RNA-Seq	cDNA	TRANSCRIPTOMIC					Whole body	NA
SRR8121086		570145000	291	SINGLE	SAMN10338925	Apis_mellifera	RNA-Seq	cDNA	TRANSCRIPTOMIC					Whole body	NA
SRR8121087		507637500	261	SINGLE	SAMN10338924	Apis_mellifera	RNA-Seq	cDNA	TRANSCRIPTOMIC					Whole body	NA
SRR8121088		507927200	263	SINGLE	SAMN10338924	Apis_mellifera	RNA-Seq	cDNA	TRANSCRIPTOMIC					Whole body	NA
SRR8121089		668128100	345	SINGLE	SAMN10338923	Apis_mellifera	RNA-Seq	cDNA	TRANSCRIPTOMIC					Whole body	NA
SRR8121090		680655200	346	SINGLE	SAMN10338923	Apis_mellifera	RNA-Seq	cDNA	TRANSCRIPTOMIC					Whole body	NA
SRR8121091		539276400	278	SINGLE	SAMN10338922	Apis_mellifera	RNA-Seq	cDNA	TRANSCRIPTOMIC					Whole body	NA
SRR8121092		551321900	279	SINGLE	SAMN10338922	Apis_mellifera	RNA-Seq	cDNA	TRANSCRIPTOMIC					Whole body	NA
SRR8121093		653638700	333	SINGLE	SAMN10338921	Apis_mellifera	RNA-Seq	cDNA	TRANSCRIPTOMIC					Whole body	NA
SRR8121094		651921600	334	SINGLE	SAMN10338921	Apis_mellifera	RNA-Seq	cDNA	TRANSCRIPTOMIC					Whole body	NA
SRR8121095		657146800	337	SINGLE	SAMN10338920	Apis_mellifera	RNA-Seq	cDNA	TRANSCRIPTOMIC					Whole body	NA
SRR8121096		654942600	337	SINGLE	SAMN10338920	Apis_mellifera	RNA-Seq	cDNA	TRANSCRIPTOMIC					Whole body	NA
SRR8121097		785899000	400	SINGLE	SAMN10338919	Apis_mellifera	RNA-Seq	cDNA	TRANSCRIPTOMIC					Whole body	NA
SRR8121098		784524200	401	SINGLE	SAMN10338919	Apis_mellifera	RNA-Seq	cDNA	TRANSCRIPTOMIC					Whole body	NA
SRR8121099		703317500	358	SINGLE	SAMN10338918	Apis_mellifera	RNA-Seq	cDNA	TRANSCRIPTOMIC					Whole body	NA
SRR8121100		701987200	359	SINGLE	SAMN10338918	Apis_mellifera	RNA-Seq	cDNA	TRANSCRIPTOMIC					Whole body	NA
SRR8121101		494148400	258	SINGLE	SAMN10338917	Apis_mellifera	RNA-Seq	cDNA	TRANSCRIPTOMIC					Whole body	NA
SRR8121102		504922000	260	SINGLE	SAMN10338917	Apis_mellifera	RNA-Seq	cDNA	TRANSCRIPTOMIC					Whole body	NA
SRR8121103		700036400	361	SINGLE	SAMN10338916	Apis_mellifera	RNA-Seq	cDNA	TRANSCRIPTOMIC					Whole body	NA
SRR8121104		714142600	363	SINGLE	SAMN10338916	Apis_mellifera	RNA-Seq	cDNA	TRANSCRIPTOMIC					Whole body	NA
SRR8121105		735144500	380	SINGLE	SAMN10338915	Apis_mellifera	RNA-Seq	cDNA	TRANSCRIPTOMIC					Whole body	NA
SRR8121106		748970200	381	SINGLE	SAMN10338915	Apis_mellifera	RNA-Seq	cDNA	TRANSCRIPTOMIC					Whole body	NA
SRR8121107		882488900	458	SINGLE	SAMN10338914	Apis_mellifera	RNA-Seq	cDNA	TRANSCRIPTOMIC					Whole body	NA
SRR8121108		899881900	460	SINGLE	SAMN10338914	Apis_mellifera	RNA-Seq	cDNA	TRANSCRIPTOMIC					Whole body	NA
SRR8121109		820943400	419	SINGLE	SAMN10338913	Apis_mellifera	RNA-Seq	cDNA	TRANSCRIPTOMIC					Whole body	NA
SRR8121110		821428800	422	SINGLE	SAMN10338913	Apis_mellifera	RNA-Seq	cDNA	TRANSCRIPTOMIC					Whole body	NA
SRR8121111		703520500	363	SINGLE	SAMN10338912	Apis_mellifera	RNA-Seq	cDNA	TRANSCRIPTOMIC					Whole body	NA
SRR8121112		701181700	363	SINGLE	SAMN10338912	Apis_mellifera	RNA-Seq	cDNA	TRANSCRIPTOMIC					Whole body	NA
SRR8121113		714580700	369	SINGLE	SAMN10338911	Apis_mellifera	RNA-Seq	cDNA	TRANSCRIPTOMIC					Whole body	NA
SRR8121114		729109400	371	SINGLE	SAMN10338911	Apis_mellifera	RNA-Seq	cDNA	TRANSCRIPTOMIC					Whole body	NA
SRR8121115		661798000	339	SINGLE	SAMN10338910	Apis_mellifera	RNA-Seq	cDNA	TRANSCRIPTOMIC					Whole body	NA
SRR8121116		674652900	340	SINGLE	SAMN10338910	Apis_mellifera	RNA-Seq	cDNA	TRANSCRIPTOMIC					Whole body	NA
SRR8121117		657267800	334	SINGLE	SAMN10338909	Apis_mellifera	RNA-Seq	cDNA	TRANSCRIPTOMIC					Whole body	NA
SRR8121118		656436400	335	SINGLE	SAMN10338909	Apis_mellifera	RNA-Seq	cDNA	TRANSCRIPTOMIC					Whole body	NA
SRR8121119		659995100	336	SINGLE	SAMN10338908	Apis_mellifera	RNA-Seq	cDNA	TRANSCRIPTOMIC					Whole body	NA
SRR8121120		659950500	338	SINGLE	SAMN10338908	Apis_mellifera	RNA-Seq	cDNA	TRANSCRIPTOMIC					Whole body	NA
SRR8121121		739623200	375	SINGLE	SAMN10338907	Apis_mellifera	RNA-Seq	cDNA	TRANSCRIPTOMIC					Whole body	NA
SRR8121122		740405300	377	SINGLE	SAMN10338907	Apis_mellifera	RNA-Seq	cDNA	TRANSCRIPTOMIC					Whole body	NA
SRR8121123		583255100	297	SINGLE	SAMN10338906	Apis_mellifera	RNA-Seq	cDNA	TRANSCRIPTOMIC					Whole body	NA
SRR8121124		581555300	297	SINGLE	SAMN10338906	Apis_mellifera	RNA-Seq	cDNA	TRANSCRIPTOMIC					Whole body	NA
SRR8113905		296395022	197	SINGLE	SAMN04910072	Apis_mellifera	RNA-Seq	PolyA	TRANSCRIPTOMIC					mandibular gland	NA
SRR3476890		279857424	180	SINGLE	SAMN04910074	Apis_mellifera	RNA-Seq	PolyA	TRANSCRIPTOMIC					mandibular gland	NA
SRR3476887		291323277	185	SINGLE	SAMN04910073	Apis_mellifera	RNA-Seq	PolyA	TRANSCRIPTOMIC					mandibular gland	NA
DRR152979		3491169500	1366	PAIRED	SAMD00106320	Apis_mellifera	RNA-Seq	PolyA	TRANSCRIPTOMIC	female				NA	NA
DRR152980		4015122500	1574	PAIRED	SAMD00106321	Apis_mellifera	RNA-Seq	PolyA	TRANSCRIPTOMIC	female				NA	NA
DRR152975		3450314750	1375	PAIRED	SAMD00106316	Apis_mellifera	RNA-Seq	PolyA	TRANSCRIPTOMIC	female				NA	NA
DRR152976		3538504500	1371	PAIRED	SAMD00106317	Apis_mellifera	RNA-Seq	PolyA	TRANSCRIPTOMIC	female				NA	NA
DRR152977		3927051750	1545	PAIRED	SAMD00106318	Apis_mellifera	RNA-Seq	PolyA	TRANSCRIPTOMIC	female				NA	NA
DRR152978		3363381250	1318	PAIRED	SAMD00106319	Apis_mellifera	RNA-Seq	PolyA	TRANSCRIPTOMIC	female				NA	NA
SRR7908186		350863471	183	SINGLE	SAMN10136819	Apis_mellifera	RNA-Seq	cDNA	TRANSCRIPTOMIC					ovary	NA
SRR7908187		341249573	180	SINGLE	SAMN10136818	Apis_mellifera	RNA-Seq	cDNA	TRANSCRIPTOMIC					ovary	NA
SRR7908188		367677429	193	SINGLE	SAMN10136817	Apis_mellifera	RNA-Seq	cDNA	TRANSCRIPTOMIC					ovary	NA
SRR7908189		343432572	178	SINGLE	SAMN10136816	Apis_mellifera	RNA-Seq	cDNA	TRANSCRIPTOMIC					ovary	NA
SRR7908190		352430589	184	SINGLE	SAMN10136815	Apis_mellifera	RNA-Seq	cDNA	TRANSCRIPTOMIC					ovary	NA
SRR7908191		352643053	184	SINGLE	SAMN10136814	Apis_mellifera	RNA-Seq	cDNA	TRANSCRIPTOMIC					ovary	NA
SRR7829131		10056290600	4328	PAIRED	SAMN10034093	Apis_mellifera	RNA-Seq	PolyA	TRANSCRIPTOMIC	female				abdominal integument	forager bee (arriving in the nest with pollen)
SRR7829132		5839314000	2509	PAIRED	SAMN10034094	Apis_mellifera	RNA-Seq	PolyA	TRANSCRIPTOMIC	female				abdominal integument	forager bee (arriving in the nest with pollen)
SRR7829127		6976636400	2991	PAIRED	SAMN10034095	Apis_mellifera	RNA-Seq	PolyA	TRANSCRIPTOMIC	female				abdominal integument	forager bee (arriving in the nest with pollen)
SRR7829136		8092259200	3424	PAIRED	SAMN10034090	Apis_mellifera	RNA-Seq	PolyA	TRANSCRIPTOMIC	female				abdominal integument	newly emerged, NE, 0h after adult emergence
SRR7829129		7706801800	3249	PAIRED	SAMN10034091	Apis_mellifera	RNA-Seq	PolyA	TRANSCRIPTOMIC	female				abdominal integument	newly emerged, NE, 0h after adult emergence
SRR7829130		9747987600	4130	PAIRED	SAMN10034092	Apis_mellifera	RNA-Seq	PolyA	TRANSCRIPTOMIC	female				abdominal integument	newly emerged, NE, 0h after adult emergence
SRR7829133		7842260200	3420	PAIRED	SAMN10034087	Apis_mellifera	RNA-Seq	PolyA	TRANSCRIPTOMIC	female				abdominal integument	pharate adults in process of cuticle pigmentation, Pbm phase
SRR7829134		8222714400	3572	PAIRED	SAMN10034088	Apis_mellifera	RNA-Seq	PolyA	TRANSCRIPTOMIC	female				abdominal integument	pharate adults in process of cuticle pigmentation, Pbm phase
SRR7829135		4804751600	2078	PAIRED	SAMN10034089	Apis_mellifera	RNA-Seq	PolyA	TRANSCRIPTOMIC	female				abdominal integument	pharate adults in process of cuticle pigmentation, Pbm phase
SRR7770429		16910848200	7190	PAIRED	SAMN09937978	Apis_mellifera	RNA-Seq	cDNA	TRANSCRIPTOMIC					ovaries	NA
SRR7770430		14745243600	5880	PAIRED	SAMN09937977	Apis_mellifera	RNA-Seq	cDNA	TRANSCRIPTOMIC					ovaries	NA
SRR7770431		676841150	225	SINGLE	SAMN09937976	Apis_mellifera	RNA-Seq	cDNA	TRANSCRIPTOMIC					ovaries	NA
SRR7770432		16647969000	7194	PAIRED	SAMN09937975	Apis_mellifera	RNA-Seq	cDNA	TRANSCRIPTOMIC					ovaries	NA
SRR7770433		13651778100	5461	PAIRED	SAMN09937974	Apis_mellifera	RNA-Seq	cDNA	TRANSCRIPTOMIC					ovaries	NA
SRR7770434		649344650	206	SINGLE	SAMN09937973	Apis_mellifera	RNA-Seq	cDNA	TRANSCRIPTOMIC					ovaries	NA
SRR7770435		16929222600	7401	PAIRED	SAMN09937972	Apis_mellifera	RNA-Seq	cDNA	TRANSCRIPTOMIC					ovaries	NA
SRR7770436		15048965400	6041	PAIRED	SAMN09937971	Apis_mellifera	RNA-Seq	cDNA	TRANSCRIPTOMIC					ovaries	NA
SRR7770437		673704550	215	SINGLE	SAMN09937970	Apis_mellifera	RNA-Seq	cDNA	TRANSCRIPTOMIC					ovaries	NA
SRR7513058		7529435100	3191	PAIRED	SAMN09635258	Apis_mellifera	RNA-Seq	cDNA	TRANSCRIPTOMIC	female				head	forager worker
SRR7513059		7795098900	3262	PAIRED	SAMN09635257	Apis_mellifera	RNA-Seq	cDNA	TRANSCRIPTOMIC	female				head	nurse worker
SRR7460786		8192340600	2588	PAIRED	SAMN09533372	Apis_mellifera	RNA-Seq	PCR	TRANSCRIPTOMIC	female				tissue sample	larvae
SRR7460787		7069653900	2285	PAIRED	SAMN09533372	Apis_mellifera	RNA-Seq	PCR	TRANSCRIPTOMIC	female				tissue sample	larvae
SRR7460788		8474159400	2683	PAIRED	SAMN09533372	Apis_mellifera	RNA-Seq	PCR	TRANSCRIPTOMIC	female				tissue sample	larvae
SRR7472351		9198236900	5804	SINGLE	SAMN09603745	Apis_mellifera	RNA-Seq	cDNA	TRANSCRIPTOMIC					embryo	embryo
SRR7472352		8545551300	5385	SINGLE	SAMN09603744	Apis_mellifera	RNA-Seq	cDNA	TRANSCRIPTOMIC					larva	larva
SRR7472353		7891135000	4976	SINGLE	SAMN09603743	Apis_mellifera	RNA-Seq	cDNA	TRANSCRIPTOMIC					pupa	pupa
SRR7472354		6819814100	4391	SINGLE	SAMN09603742	Apis_mellifera	RNA-Seq	cDNA	TRANSCRIPTOMIC					head	mature
SRR7472355		7133577500	4480	SINGLE	SAMN09603741	Apis_mellifera	RNA-Seq	cDNA	TRANSCRIPTOMIC					larva	larva
SRR7472356		8227073600	5293	SINGLE	SAMN09603740	Apis_mellifera	RNA-Seq	cDNA	TRANSCRIPTOMIC					head	mature
SRR7472357		7703339200	4964	SINGLE	SAMN09603739	Apis_mellifera	RNA-Seq	cDNA	TRANSCRIPTOMIC					head	mature
SRR7472358		8394653100	5152	SINGLE	SAMN09603738	Apis_mellifera	RNA-Seq	cDNA	TRANSCRIPTOMIC					embryo	embryo
SRR7472359		9057114100	5662	SINGLE	SAMN09603737	Apis_mellifera	RNA-Seq	cDNA	TRANSCRIPTOMIC					larva	larva
SRR7472360		9213339600	5899	SINGLE	SAMN09603764	Apis_mellifera	RNA-Seq	cDNA	TRANSCRIPTOMIC					pupa	pupa
SRR7472361		5370611900	3020	SINGLE	SAMN09603763	Apis_mellifera	RNA-Seq	cDNA	TRANSCRIPTOMIC					head	mature
SRR7472362		13193862700	7971	SINGLE	SAMN09603762	Apis_mellifera	RNA-Seq	cDNA	TRANSCRIPTOMIC					larva	larva
SRR7472363		5740600800	3456	SINGLE	SAMN09603761	Apis_mellifera	RNA-Seq	cDNA	TRANSCRIPTOMIC					head	mature
SRR7460780		9079839600	2906	PAIRED	SAMN09533377	Apis_mellifera	RNA-Seq	PCR	TRANSCRIPTOMIC	female				tissue sample	larvae
SRR7460781		8419849800	2697	PAIRED	SAMN09533378	Apis_mellifera	RNA-Seq	PCR	TRANSCRIPTOMIC	female				tissue sample	larvae
SRR7460782		8062274700	2581	PAIRED	SAMN09533378	Apis_mellifera	RNA-Seq	PCR	TRANSCRIPTOMIC	female				tissue sample	larvae
SRR7460783		8623075200	2765	PAIRED	SAMN09533378	Apis_mellifera	RNA-Seq	PCR	TRANSCRIPTOMIC	female				tissue sample	larvae
SRR7460784		8132440200	2611	PAIRED	SAMN09533373	Apis_mellifera	RNA-Seq	PCR	TRANSCRIPTOMIC	female				tissue sample	larvae
SRR7460785		8100248700	2638	PAIRED	SAMN09533373	Apis_mellifera	RNA-Seq	PCR	TRANSCRIPTOMIC	female				tissue sample	larvae
SRR7513056		15124499400	6311	PAIRED	SAMN09635262	Apis_mellifera	RNA-Seq	cDNA	TRANSCRIPTOMIC	female				head	forager worker
SRR7513061		9060533400	3789	PAIRED	SAMN09635259	Apis_mellifera	RNA-Seq	cDNA	TRANSCRIPTOMIC	female				head	nurse worker
SRR7513060		15372426000	6377	PAIRED	SAMN09635260	Apis_mellifera	RNA-Seq	cDNA	TRANSCRIPTOMIC	female				head	forager worker
SRR7513057		8997462000	3729	PAIRED	SAMN09635261	Apis_mellifera	RNA-Seq	cDNA	TRANSCRIPTOMIC	female				head	nurse worker
SRR7460797		7912726200	2552	PAIRED	SAMN09533375	Apis_mellifera	RNA-Seq	PCR	TRANSCRIPTOMIC	female				tissue sample	larvae
SRR7460802		8650141200	2826	PAIRED	SAMN09533375	Apis_mellifera	RNA-Seq	PCR	TRANSCRIPTOMIC	female				tissue sample	larvae
SRR7460803		8564992200	3049	PAIRED	SAMN09533375	Apis_mellifera	RNA-Seq	PCR	TRANSCRIPTOMIC	female				tissue sample	larvae
SRR7460798		7114678800	2285	PAIRED	SAMN09533376	Apis_mellifera	RNA-Seq	PCR	TRANSCRIPTOMIC	female				tissue sample	larvae
SRR7460799		8548953300	2750	PAIRED	SAMN09533376	Apis_mellifera	RNA-Seq	PCR	TRANSCRIPTOMIC	female				tissue sample	larvae
SRR7460796		8190079800	2654	PAIRED	SAMN09533376	Apis_mellifera	RNA-Seq	PCR	TRANSCRIPTOMIC	female				tissue sample	larvae
SRR7460789		7381603800	2383	PAIRED	SAMN09533371	Apis_mellifera	RNA-Seq	PCR	TRANSCRIPTOMIC	female				tissue sample	larvae
SRR7460790		8367410100	2692	PAIRED	SAMN09533371	Apis_mellifera	RNA-Seq	PCR	TRANSCRIPTOMIC	female				tissue sample	larvae
SRR7460791		8410684800	2681	PAIRED	SAMN09533371	Apis_mellifera	RNA-Seq	PCR	TRANSCRIPTOMIC	female				tissue sample	larvae
SRR7460794		7346294400	2393	PAIRED	SAMN09533377	Apis_mellifera	RNA-Seq	PCR	TRANSCRIPTOMIC	female				tissue sample	larvae
SRR7460795		7900191000	2528	PAIRED	SAMN09533377	Apis_mellifera	RNA-Seq	PCR	TRANSCRIPTOMIC	female				tissue sample	larvae
SRR7460793		7841418000	2512	PAIRED	SAMN09533373	Apis_mellifera	RNA-Seq	PCR	TRANSCRIPTOMIC	female				tissue sample	larvae
SRR7460792		8484628200	2713	PAIRED	SAMN09533374	Apis_mellifera	RNA-Seq	PCR	TRANSCRIPTOMIC	female				tissue sample	larvae
SRR7460800		10172980500	3608	PAIRED	SAMN09533374	Apis_mellifera	RNA-Seq	PCR	TRANSCRIPTOMIC	female				tissue sample	larvae
SRR7460801		8530993800	2716	PAIRED	SAMN09533374	Apis_mellifera	RNA-Seq	PCR	TRANSCRIPTOMIC	female				tissue sample	larvae
DRR129201		43428131	22	SINGLE	SAMD00116772	Apis_mellifera	RNA-Seq	cDNA	TRANSCRIPTOMIC	female				NA	NA
DRR129202		39166359	20	SINGLE	SAMD00116773	Apis_mellifera	RNA-Seq	cDNA	TRANSCRIPTOMIC	female				NA	NA
DRR129203		38062076	22	SINGLE	SAMD00116774	Apis_mellifera	RNA-Seq	cDNA	TRANSCRIPTOMIC	female				NA	NA
DRR129204		44258740	22	SINGLE	SAMD00116775	Apis_mellifera	RNA-Seq	cDNA	TRANSCRIPTOMIC	female				NA	NA
DRR129205		55760425	29	SINGLE	SAMD00116776	Apis_mellifera	RNA-Seq	cDNA	TRANSCRIPTOMIC	female				NA	NA
DRR129206		51418133	28	SINGLE	SAMD00116777	Apis_mellifera	RNA-Seq	cDNA	TRANSCRIPTOMIC	female				NA	NA
DRR129207		61165597	31	SINGLE	SAMD00116778	Apis_mellifera	RNA-Seq	cDNA	TRANSCRIPTOMIC	female				NA	NA
DRR129208		39143269	21	SINGLE	SAMD00116779	Apis_mellifera	RNA-Seq	cDNA	TRANSCRIPTOMIC	female				NA	NA
DRR129209		47915909	25	SINGLE	SAMD00116780	Apis_mellifera	RNA-Seq	cDNA	TRANSCRIPTOMIC	female				NA	NA
DRR129210		47506062	24	SINGLE	SAMD00116781	Apis_mellifera	RNA-Seq	cDNA	TRANSCRIPTOMIC	female				NA	NA
DRR129211		48436769	25	SINGLE	SAMD00116782	Apis_mellifera	RNA-Seq	cDNA	TRANSCRIPTOMIC	female				NA	NA
DRR129212		50348980	27	SINGLE	SAMD00116783	Apis_mellifera	RNA-Seq	cDNA	TRANSCRIPTOMIC	female				NA	NA
DRR129213		45029309	24	SINGLE	SAMD00116784	Apis_mellifera	RNA-Seq	cDNA	TRANSCRIPTOMIC	female				NA	NA
DRR129214		51812231	27	SINGLE	SAMD00116785	Apis_mellifera	RNA-Seq	cDNA	TRANSCRIPTOMIC	female				NA	NA
DRR129215		47817100	24	SINGLE	SAMD00116786	Apis_mellifera	RNA-Seq	cDNA	TRANSCRIPTOMIC	female				NA	NA
DRR129216		41785983	21	SINGLE	SAMD00116787	Apis_mellifera	RNA-Seq	cDNA	TRANSCRIPTOMIC	female				NA	NA
DRR129217		48201582	25	SINGLE	SAMD00116788	Apis_mellifera	RNA-Seq	cDNA	TRANSCRIPTOMIC	female				NA	NA
DRR129218		57167262	29	SINGLE	SAMD00116789	Apis_mellifera	RNA-Seq	cDNA	TRANSCRIPTOMIC	female				NA	NA
DRR129219		49061440	26	SINGLE	SAMD00116790	Apis_mellifera	RNA-Seq	cDNA	TRANSCRIPTOMIC	female				NA	NA
DRR129220		40777932	21	SINGLE	SAMD00116791	Apis_mellifera	RNA-Seq	cDNA	TRANSCRIPTOMIC	female				NA	NA
SRR7006968		4963235004	1778	SINGLE	SAMN08934358	Apis_mellifera	RNA-Seq	unspecified	TRANSCRIPTOMIC	male				brain	not applicable
SRR7006970		4767413994	1710	SINGLE	SAMN08934360	Apis_mellifera	RNA-Seq	unspecified	TRANSCRIPTOMIC	male				brain	not applicable
SRR7006969		4666390974	1679	SINGLE	SAMN08934361	Apis_mellifera	RNA-Seq	unspecified	TRANSCRIPTOMIC	male				brain	not applicable
SRR7006993		5412745548	1927	SINGLE	SAMN08934326	Apis_mellifera	RNA-Seq	unspecified	TRANSCRIPTOMIC	male				brain	not applicable
SRR7006992		4530517236	1637	SINGLE	SAMN08934327	Apis_mellifera	RNA-Seq	unspecified	TRANSCRIPTOMIC	male				brain	not applicable
SRR7006995		3916766700	1404	SINGLE	SAMN08934328	Apis_mellifera	RNA-Seq	unspecified	TRANSCRIPTOMIC	male				brain	not applicable
SRR7006994		3983209146	1424	SINGLE	SAMN08934329	Apis_mellifera	RNA-Seq	unspecified	TRANSCRIPTOMIC	male				brain	not applicable
SRR7006989		4956545412	1778	SINGLE	SAMN08934330	Apis_mellifera	RNA-Seq	unspecified	TRANSCRIPTOMIC	male				brain	not applicable
SRR7007005		4707740520	1706	SINGLE	SAMN08934331	Apis_mellifera	RNA-Seq	unspecified	TRANSCRIPTOMIC	male				brain	not applicable
SRR7006991		6228466398	2223	SINGLE	SAMN08934332	Apis_mellifera	RNA-Seq	unspecified	TRANSCRIPTOMIC	male				brain	not applicable
SRR7006990		5372778726	1918	SINGLE	SAMN08934333	Apis_mellifera	RNA-Seq	unspecified	TRANSCRIPTOMIC	male				brain	not applicable
SRR7006986		4600487430	1642	SINGLE	SAMN08934334	Apis_mellifera	RNA-Seq	unspecified	TRANSCRIPTOMIC	male				brain	not applicable
SRR7006985		4346872488	1543	SINGLE	SAMN08934335	Apis_mellifera	RNA-Seq	unspecified	TRANSCRIPTOMIC	male				brain	not applicable
SRR7006984		3792467322	1362	SINGLE	SAMN08934336	Apis_mellifera	RNA-Seq	unspecified	TRANSCRIPTOMIC	male				brain	not applicable
SRR7006983		5062893822	1835	SINGLE	SAMN08934337	Apis_mellifera	RNA-Seq	unspecified	TRANSCRIPTOMIC	male				brain	not applicable
SRR7006982		5365431162	1926	SINGLE	SAMN08934338	Apis_mellifera	RNA-Seq	unspecified	TRANSCRIPTOMIC	male				brain	not applicable
SRR7006981		4435769646	1590	SINGLE	SAMN08934339	Apis_mellifera	RNA-Seq	unspecified	TRANSCRIPTOMIC	male				brain	not applicable
SRR7006980		4368542724	1580	SINGLE	SAMN08934340	Apis_mellifera	RNA-Seq	unspecified	TRANSCRIPTOMIC	male				brain	not applicable
SRR7006979		3979566486	1421	SINGLE	SAMN08934341	Apis_mellifera	RNA-Seq	unspecified	TRANSCRIPTOMIC	male				brain	not applicable
SRR7006978		3340961820	1205	SINGLE	SAMN08934342	Apis_mellifera	RNA-Seq	unspecified	TRANSCRIPTOMIC	male				brain	not applicable
SRR7006977		6688851876	2389	SINGLE	SAMN08934343	Apis_mellifera	RNA-Seq	unspecified	TRANSCRIPTOMIC	male				brain	not applicable
SRR7006976		5051840724	1800	SINGLE	SAMN08934344	Apis_mellifera	RNA-Seq	unspecified	TRANSCRIPTOMIC	male				brain	not applicable
SRR7006975		5904138366	2106	SINGLE	SAMN08934345	Apis_mellifera	RNA-Seq	unspecified	TRANSCRIPTOMIC	male				brain	not applicable
SRR7007003		5053236930	1806	SINGLE	SAMN08934346	Apis_mellifera	RNA-Seq	unspecified	TRANSCRIPTOMIC	male				brain	not applicable
SRR7007004		4507992468	1608	SINGLE	SAMN08934347	Apis_mellifera	RNA-Seq	unspecified	TRANSCRIPTOMIC	male				brain	not applicable
SRR7007001		3945186126	1411	SINGLE	SAMN08934348	Apis_mellifera	RNA-Seq	unspecified	TRANSCRIPTOMIC	male				brain	not applicable
SRR7007002		3321528210	1194	SINGLE	SAMN08934349	Apis_mellifera	RNA-Seq	unspecified	TRANSCRIPTOMIC	male				brain	not applicable
SRR7006999		5923564416	2134	SINGLE	SAMN08934350	Apis_mellifera	RNA-Seq	unspecified	TRANSCRIPTOMIC	male				brain	not applicable
SRR7007000		6723138870	2408	SINGLE	SAMN08934351	Apis_mellifera	RNA-Seq	unspecified	TRANSCRIPTOMIC	male				brain	not applicable
SRR7006997		5076757602	1830	SINGLE	SAMN08934352	Apis_mellifera	RNA-Seq	unspecified	TRANSCRIPTOMIC	male				brain	not applicable
SRR7006998		4201903062	1507	SINGLE	SAMN08934353	Apis_mellifera	RNA-Seq	unspecified	TRANSCRIPTOMIC	male				brain	not applicable
SRR7007006		5839438122	2086	SINGLE	SAMN08934354	Apis_mellifera	RNA-Seq	unspecified	TRANSCRIPTOMIC	male				brain	not applicable
SRR7007007		3997560042	1424	SINGLE	SAMN08934355	Apis_mellifera	RNA-Seq	unspecified	TRANSCRIPTOMIC	male				brain	not applicable
SRR7006974		5429690028	1940	SINGLE	SAMN08934356	Apis_mellifera	RNA-Seq	unspecified	TRANSCRIPTOMIC	male				brain	not applicable
SRR7006973		4982190696	1781	SINGLE	SAMN08934357	Apis_mellifera	RNA-Seq	unspecified	TRANSCRIPTOMIC	male				brain	not applicable
SRR7006988		4852146096	1737	SINGLE	SAMN08934359	Apis_mellifera	RNA-Seq	unspecified	TRANSCRIPTOMIC	male				brain	not applicable
SRR7006972		4817666574	1725	SINGLE	SAMN08934362	Apis_mellifera	RNA-Seq	unspecified	TRANSCRIPTOMIC	male				brain	not applicable
SRR7006971		4621656186	1657	SINGLE	SAMN08934363	Apis_mellifera	RNA-Seq	unspecified	TRANSCRIPTOMIC	male				brain	not applicable
SRR7006987		4276895742	1532	SINGLE	SAMN08934364	Apis_mellifera	RNA-Seq	unspecified	TRANSCRIPTOMIC	male				brain	not applicable
SRR7006996		4266517248	1546	SINGLE	SAMN08934365	Apis_mellifera	RNA-Seq	unspecified	TRANSCRIPTOMIC	male				brain	not applicable
SRR7000738		1561454900	977	SINGLE	SAMN08929779	Apis_mellifera	RNA-Seq	cDNA	TRANSCRIPTOMIC					mushroom body	NA
SRR7000739		1789460100	1123	SINGLE	SAMN08929778	Apis_mellifera	RNA-Seq	cDNA	TRANSCRIPTOMIC					mushroom body	NA
SRR7000740		2343993000	1491	SINGLE	SAMN08929777	Apis_mellifera	RNA-Seq	cDNA	TRANSCRIPTOMIC					mushroom body	NA
SRR7000741		2195287600	1407	SINGLE	SAMN08929776	Apis_mellifera	RNA-Seq	cDNA	TRANSCRIPTOMIC					mushroom body	NA
SRR7000742		2555322700	1628	SINGLE	SAMN08929775	Apis_mellifera	RNA-Seq	cDNA	TRANSCRIPTOMIC					mushroom body	NA
SRR7000743		1951220200	1240	SINGLE	SAMN08929774	Apis_mellifera	RNA-Seq	cDNA	TRANSCRIPTOMIC					mushroom body	NA
SRR7000744		2415056100	1484	SINGLE	SAMN08929773	Apis_mellifera	RNA-Seq	cDNA	TRANSCRIPTOMIC					mushroom body	NA
SRR7000745		2491278300	1595	SINGLE	SAMN08929772	Apis_mellifera	RNA-Seq	cDNA	TRANSCRIPTOMIC					mushroom body	NA
SRR7000746		2275119800	1464	SINGLE	SAMN08929771	Apis_mellifera	RNA-Seq	cDNA	TRANSCRIPTOMIC					mushroom body	NA
SRR7000747		2401515000	1537	SINGLE	SAMN08929770	Apis_mellifera	RNA-Seq	cDNA	TRANSCRIPTOMIC					mushroom body	NA
SRR7000748		2367684100	1503	SINGLE	SAMN08929872	Apis_mellifera	RNA-Seq	cDNA	TRANSCRIPTOMIC					mushroom body	NA
SRR7000749		2460159600	1567	SINGLE	SAMN08929871	Apis_mellifera	RNA-Seq	cDNA	TRANSCRIPTOMIC					mushroom body	NA
SRR7000750		2505295200	1574	SINGLE	SAMN08929870	Apis_mellifera	RNA-Seq	cDNA	TRANSCRIPTOMIC					mushroom body	NA
SRR7000751		2493401500	1541	SINGLE	SAMN08929869	Apis_mellifera	RNA-Seq	cDNA	TRANSCRIPTOMIC					mushroom body	NA
SRR7000752		2548947000	1580	SINGLE	SAMN08929868	Apis_mellifera	RNA-Seq	cDNA	TRANSCRIPTOMIC					mushroom body	NA
SRR7000678		2084400700	1295	SINGLE	SAMN08929882	Apis_mellifera	RNA-Seq	cDNA	TRANSCRIPTOMIC					mushroom body	NA
SRR7000679		1766146500	1105	SINGLE	SAMN08929881	Apis_mellifera	RNA-Seq	cDNA	TRANSCRIPTOMIC					mushroom body	NA
SRR7000680		2077371100	1303	SINGLE	SAMN08929880	Apis_mellifera	RNA-Seq	cDNA	TRANSCRIPTOMIC					mushroom body	NA
SRR7000681		1917466200	1201	SINGLE	SAMN08929879	Apis_mellifera	RNA-Seq	cDNA	TRANSCRIPTOMIC					mushroom body	NA
SRR7000682		2153965900	1351	SINGLE	SAMN08929878	Apis_mellifera	RNA-Seq	cDNA	TRANSCRIPTOMIC					mushroom body	NA
SRR7000683		1764184700	1108	SINGLE	SAMN08929877	Apis_mellifera	RNA-Seq	cDNA	TRANSCRIPTOMIC					mushroom body	NA
SRR7000684		2222437100	1388	SINGLE	SAMN08929876	Apis_mellifera	RNA-Seq	cDNA	TRANSCRIPTOMIC					mushroom body	NA
SRR7000685		2292975500	1454	SINGLE	SAMN08929875	Apis_mellifera	RNA-Seq	cDNA	TRANSCRIPTOMIC					mushroom body	NA
SRR7000686		2207313500	1380	SINGLE	SAMN08929874	Apis_mellifera	RNA-Seq	cDNA	TRANSCRIPTOMIC					mushroom body	NA
SRR7000687		2222689900	1370	SINGLE	SAMN08929873	Apis_mellifera	RNA-Seq	cDNA	TRANSCRIPTOMIC					mushroom body	NA
SRR7000688		2261421000	1388	SINGLE	SAMN08929803	Apis_mellifera	RNA-Seq	cDNA	TRANSCRIPTOMIC					mushroom body	NA
SRR7000689		2436279400	1562	SINGLE	SAMN08929802	Apis_mellifera	RNA-Seq	cDNA	TRANSCRIPTOMIC					mushroom body	NA
SRR7000690		2631400700	1695	SINGLE	SAMN08929801	Apis_mellifera	RNA-Seq	cDNA	TRANSCRIPTOMIC					mushroom body	NA
SRR7000691		2615685900	1675	SINGLE	SAMN08929800	Apis_mellifera	RNA-Seq	cDNA	TRANSCRIPTOMIC					mushroom body	NA
SRR7000692		2343248700	1490	SINGLE	SAMN08929799	Apis_mellifera	RNA-Seq	cDNA	TRANSCRIPTOMIC					mushroom body	NA
SRR7000693		1897761700	1208	SINGLE	SAMN08929798	Apis_mellifera	RNA-Seq	cDNA	TRANSCRIPTOMIC					mushroom body	NA
SRR7000694		2490241200	1572	SINGLE	SAMN08929797	Apis_mellifera	RNA-Seq	cDNA	TRANSCRIPTOMIC					mushroom body	NA
SRR7000695		1997540300	1264	SINGLE	SAMN08929796	Apis_mellifera	RNA-Seq	cDNA	TRANSCRIPTOMIC					mushroom body	NA
SRR7000696		2147345100	1358	SINGLE	SAMN08929795	Apis_mellifera	RNA-Seq	cDNA	TRANSCRIPTOMIC					mushroom body	NA
SRR7000697		2527280800	1608	SINGLE	SAMN08929794	Apis_mellifera	RNA-Seq	cDNA	TRANSCRIPTOMIC					mushroom body	NA
SRR7000698		2439358400	1542	SINGLE	SAMN08929793	Apis_mellifera	RNA-Seq	cDNA	TRANSCRIPTOMIC					mushroom body	NA
SRR7000699		2397376300	1508	SINGLE	SAMN08929792	Apis_mellifera	RNA-Seq	cDNA	TRANSCRIPTOMIC					mushroom body	NA
SRR7000700		2487609500	1594	SINGLE	SAMN08929791	Apis_mellifera	RNA-Seq	cDNA	TRANSCRIPTOMIC					mushroom body	NA
SRR7000701		2783184700	1790	SINGLE	SAMN08929790	Apis_mellifera	RNA-Seq	cDNA	TRANSCRIPTOMIC					mushroom body	NA
SRR7000702		1525142900	962	SINGLE	SAMN08929853	Apis_mellifera	RNA-Seq	cDNA	TRANSCRIPTOMIC					mushroom body	NA
SRR7000703		3440971800	2171	SINGLE	SAMN08929852	Apis_mellifera	RNA-Seq	cDNA	TRANSCRIPTOMIC					mushroom body	NA
SRR7000704		2365180600	1461	SINGLE	SAMN08929851	Apis_mellifera	RNA-Seq	cDNA	TRANSCRIPTOMIC					mushroom body	NA
SRR7000705		2115624000	1317	SINGLE	SAMN08929849	Apis_mellifera	RNA-Seq	cDNA	TRANSCRIPTOMIC					mushroom body	NA
SRR7000706		2514834300	1587	SINGLE	SAMN08929848	Apis_mellifera	RNA-Seq	cDNA	TRANSCRIPTOMIC					mushroom body	NA
SRR7000707		2743344100	1727	SINGLE	SAMN08929847	Apis_mellifera	RNA-Seq	cDNA	TRANSCRIPTOMIC					mushroom body	NA
SRR7000708		2536070200	1579	SINGLE	SAMN08929846	Apis_mellifera	RNA-Seq	cDNA	TRANSCRIPTOMIC					mushroom body	NA
SRR7000709		2913770200	1819	SINGLE	SAMN08929845	Apis_mellifera	RNA-Seq	cDNA	TRANSCRIPTOMIC					mushroom body	NA
SRR7000710		2607825300	1628	SINGLE	SAMN08929850	Apis_mellifera	RNA-Seq	cDNA	TRANSCRIPTOMIC					mushroom body	NA
SRR7000711		2905301100	1802	SINGLE	SAMN08929844	Apis_mellifera	RNA-Seq	cDNA	TRANSCRIPTOMIC					mushroom body	NA
SRR7000712		3005331500	1882	SINGLE	SAMN08929843	Apis_mellifera	RNA-Seq	cDNA	TRANSCRIPTOMIC					mushroom body	NA
SRR7000713		3001260500	1885	SINGLE	SAMN08929842	Apis_mellifera	RNA-Seq	cDNA	TRANSCRIPTOMIC					mushroom body	NA
SRR7000714		2649791700	1667	SINGLE	SAMN08929841	Apis_mellifera	RNA-Seq	cDNA	TRANSCRIPTOMIC					mushroom body	NA
SRR7000715		2621853400	1624	SINGLE	SAMN08929840	Apis_mellifera	RNA-Seq	cDNA	TRANSCRIPTOMIC					mushroom body	NA
SRR7000716		2715168700	1680	SINGLE	SAMN08929839	Apis_mellifera	RNA-Seq	cDNA	TRANSCRIPTOMIC					mushroom body	NA
SRR7000717		2247511700	1390	SINGLE	SAMN08929838	Apis_mellifera	RNA-Seq	cDNA	TRANSCRIPTOMIC					mushroom body	NA
SRR7000718		2773113300	1775	SINGLE	SAMN08929731	Apis_mellifera	RNA-Seq	cDNA	TRANSCRIPTOMIC					mushroom body	NA
SRR7000719		2794076000	1792	SINGLE	SAMN08929730	Apis_mellifera	RNA-Seq	cDNA	TRANSCRIPTOMIC					mushroom body	NA
SRR7000720		2764643000	1770	SINGLE	SAMN08929729	Apis_mellifera	RNA-Seq	cDNA	TRANSCRIPTOMIC					mushroom body	NA
SRR7000721		2391445900	1519	SINGLE	SAMN08929728	Apis_mellifera	RNA-Seq	cDNA	TRANSCRIPTOMIC					mushroom body	NA
SRR7000722		2451167900	1569	SINGLE	SAMN08929727	Apis_mellifera	RNA-Seq	cDNA	TRANSCRIPTOMIC					mushroom body	NA
SRR7000723		2651508600	1644	SINGLE	SAMN08929726	Apis_mellifera	RNA-Seq	cDNA	TRANSCRIPTOMIC					mushroom body	NA
SRR7000724		2717263100	1719	SINGLE	SAMN08929725	Apis_mellifera	RNA-Seq	cDNA	TRANSCRIPTOMIC					mushroom body	NA
SRR7000725		1699853500	1084	SINGLE	SAMN08929724	Apis_mellifera	RNA-Seq	cDNA	TRANSCRIPTOMIC					mushroom body	NA
SRR7000726		3044088500	1938	SINGLE	SAMN08929723	Apis_mellifera	RNA-Seq	cDNA	TRANSCRIPTOMIC					mushroom body	NA
SRR7000727		3568017200	2234	SINGLE	SAMN08929722	Apis_mellifera	RNA-Seq	cDNA	TRANSCRIPTOMIC					mushroom body	NA
SRR7000728		2096239300	1365	SINGLE	SAMN08929789	Apis_mellifera	RNA-Seq	cDNA	TRANSCRIPTOMIC					mushroom body	NA
SRR7000729		1972406100	1273	SINGLE	SAMN08929788	Apis_mellifera	RNA-Seq	cDNA	TRANSCRIPTOMIC					mushroom body	NA
SRR7000730		1854088300	1175	SINGLE	SAMN08929787	Apis_mellifera	RNA-Seq	cDNA	TRANSCRIPTOMIC					mushroom body	NA
SRR7000731		1697085200	1082	SINGLE	SAMN08929786	Apis_mellifera	RNA-Seq	cDNA	TRANSCRIPTOMIC					mushroom body	NA
SRR7000732		1785886000	1129	SINGLE	SAMN08929785	Apis_mellifera	RNA-Seq	cDNA	TRANSCRIPTOMIC					mushroom body	NA
SRR7000733		2033641900	1303	SINGLE	SAMN08929784	Apis_mellifera	RNA-Seq	cDNA	TRANSCRIPTOMIC					mushroom body	NA
SRR7000734		3075640600	1931	SINGLE	SAMN08929783	Apis_mellifera	RNA-Seq	cDNA	TRANSCRIPTOMIC					mushroom body	NA
SRR7000735		3046217400	1921	SINGLE	SAMN08929782	Apis_mellifera	RNA-Seq	cDNA	TRANSCRIPTOMIC					mushroom body	NA
SRR7000736		1433311200	902	SINGLE	SAMN08929781	Apis_mellifera	RNA-Seq	cDNA	TRANSCRIPTOMIC					mushroom body	NA
SRR7000737		2681835000	1667	SINGLE	SAMN08929780	Apis_mellifera	RNA-Seq	cDNA	TRANSCRIPTOMIC					mushroom body	NA
SRR7000658		2286708100	1477	SINGLE	SAMN08929837	Apis_mellifera	RNA-Seq	cDNA	TRANSCRIPTOMIC					mushroom body	NA
SRR7000659		1858083500	1192	SINGLE	SAMN08929836	Apis_mellifera	RNA-Seq	cDNA	TRANSCRIPTOMIC					mushroom body	NA
SRR7000660		2251039200	1437	SINGLE	SAMN08929835	Apis_mellifera	RNA-Seq	cDNA	TRANSCRIPTOMIC					mushroom body	NA
SRR7000661		2541272600	1625	SINGLE	SAMN08929834	Apis_mellifera	RNA-Seq	cDNA	TRANSCRIPTOMIC					mushroom body	NA
SRR7000662		2593401600	1629	SINGLE	SAMN08929833	Apis_mellifera	RNA-Seq	cDNA	TRANSCRIPTOMIC					mushroom body	NA
SRR7000663		2524288000	1555	SINGLE	SAMN08929832	Apis_mellifera	RNA-Seq	cDNA	TRANSCRIPTOMIC					mushroom body	NA
SRR7000664		2639518100	1638	SINGLE	SAMN08929831	Apis_mellifera	RNA-Seq	cDNA	TRANSCRIPTOMIC					mushroom body	NA
SRR7000665		2375375300	1517	SINGLE	SAMN08929830	Apis_mellifera	RNA-Seq	cDNA	TRANSCRIPTOMIC					mushroom body	NA
SRR7000666		2169513000	1385	SINGLE	SAMN08929829	Apis_mellifera	RNA-Seq	cDNA	TRANSCRIPTOMIC					mushroom body	NA
SRR7000667		2830177800	1773	SINGLE	SAMN08929828	Apis_mellifera	RNA-Seq	cDNA	TRANSCRIPTOMIC					mushroom body	NA
SRR7000668		2246184900	1409	SINGLE	SAMN08929827	Apis_mellifera	RNA-Seq	cDNA	TRANSCRIPTOMIC					mushroom body	NA
SRR7000669		2550151000	1589	SINGLE	SAMN08929826	Apis_mellifera	RNA-Seq	cDNA	TRANSCRIPTOMIC					mushroom body	NA
SRR7000670		3057990500	1911	SINGLE	SAMN08929825	Apis_mellifera	RNA-Seq	cDNA	TRANSCRIPTOMIC					mushroom body	NA
SRR7000671		2474611900	1548	SINGLE	SAMN08929824	Apis_mellifera	RNA-Seq	cDNA	TRANSCRIPTOMIC					mushroom body	NA
SRR7000672		1826826400	1132	SINGLE	SAMN08929823	Apis_mellifera	RNA-Seq	cDNA	TRANSCRIPTOMIC					mushroom body	NA
SRR7000673		2154773200	1389	SINGLE	SAMN08929822	Apis_mellifera	RNA-Seq	cDNA	TRANSCRIPTOMIC					mushroom body	NA
SRR7000674		2545999900	1632	SINGLE	SAMN08929821	Apis_mellifera	RNA-Seq	cDNA	TRANSCRIPTOMIC					mushroom body	NA
SRR7000675		1777918600	1135	SINGLE	SAMN08929885	Apis_mellifera	RNA-Seq	cDNA	TRANSCRIPTOMIC					mushroom body	NA
SRR7000676		2173015200	1363	SINGLE	SAMN08929884	Apis_mellifera	RNA-Seq	cDNA	TRANSCRIPTOMIC					mushroom body	NA
SRR7000677		1913644000	1197	SINGLE	SAMN08929883	Apis_mellifera	RNA-Seq	cDNA	TRANSCRIPTOMIC					mushroom body	NA
SRR7000598		2513817000	1575	SINGLE	SAMN08929819	Apis_mellifera	RNA-Seq	cDNA	TRANSCRIPTOMIC					mushroom body	NA
SRR7000599		2504781800	1553	SINGLE	SAMN08929818	Apis_mellifera	RNA-Seq	cDNA	TRANSCRIPTOMIC					mushroom body	NA
SRR7000600		2193045900	1350	SINGLE	SAMN08929817	Apis_mellifera	RNA-Seq	cDNA	TRANSCRIPTOMIC					mushroom body	NA
SRR7000601		3144026200	2014	SINGLE	SAMN08929816	Apis_mellifera	RNA-Seq	cDNA	TRANSCRIPTOMIC					mushroom body	NA
SRR7000602		2826686200	1820	SINGLE	SAMN08929815	Apis_mellifera	RNA-Seq	cDNA	TRANSCRIPTOMIC					mushroom body	NA
SRR7000603		2781715300	1775	SINGLE	SAMN08929814	Apis_mellifera	RNA-Seq	cDNA	TRANSCRIPTOMIC					mushroom body	NA
SRR7000604		2558565200	1627	SINGLE	SAMN08929813	Apis_mellifera	RNA-Seq	cDNA	TRANSCRIPTOMIC					mushroom body	NA
SRR7000605		2692631500	1714	SINGLE	SAMN08929812	Apis_mellifera	RNA-Seq	cDNA	TRANSCRIPTOMIC					mushroom body	NA
SRR7000606		2577158500	1633	SINGLE	SAMN08929811	Apis_mellifera	RNA-Seq	cDNA	TRANSCRIPTOMIC					mushroom body	NA
SRR7000607		1932279100	1233	SINGLE	SAMN08929810	Apis_mellifera	RNA-Seq	cDNA	TRANSCRIPTOMIC					mushroom body	NA
SRR7000608		2012441200	1277	SINGLE	SAMN08929809	Apis_mellifera	RNA-Seq	cDNA	TRANSCRIPTOMIC					mushroom body	NA
SRR7000609		2860708100	1821	SINGLE	SAMN08929808	Apis_mellifera	RNA-Seq	cDNA	TRANSCRIPTOMIC					mushroom body	NA
SRR7000610		2376886200	1510	SINGLE	SAMN08929807	Apis_mellifera	RNA-Seq	cDNA	TRANSCRIPTOMIC					mushroom body	NA
SRR7000611		2056858700	1295	SINGLE	SAMN08929806	Apis_mellifera	RNA-Seq	cDNA	TRANSCRIPTOMIC					mushroom body	NA
SRR7000612		1966926400	1272	SINGLE	SAMN08929805	Apis_mellifera	RNA-Seq	cDNA	TRANSCRIPTOMIC					mushroom body	NA
SRR7000613		2122954000	1364	SINGLE	SAMN08929804	Apis_mellifera	RNA-Seq	cDNA	TRANSCRIPTOMIC					mushroom body	NA
SRR7000614		1813329300	1149	SINGLE	SAMN08929917	Apis_mellifera	RNA-Seq	cDNA	TRANSCRIPTOMIC					mushroom body	NA
SRR7000615		1950926700	1243	SINGLE	SAMN08929916	Apis_mellifera	RNA-Seq	cDNA	TRANSCRIPTOMIC					mushroom body	NA
SRR7000616		2016248500	1236	SINGLE	SAMN08929867	Apis_mellifera	RNA-Seq	cDNA	TRANSCRIPTOMIC					mushroom body	NA
SRR7000617		1243805500	766	SINGLE	SAMN08929866	Apis_mellifera	RNA-Seq	cDNA	TRANSCRIPTOMIC					mushroom body	NA
SRR7000618		1935905600	1204	SINGLE	SAMN08929865	Apis_mellifera	RNA-Seq	cDNA	TRANSCRIPTOMIC					mushroom body	NA
SRR7000619		2223049400	1382	SINGLE	SAMN08929864	Apis_mellifera	RNA-Seq	cDNA	TRANSCRIPTOMIC					mushroom body	NA
SRR7000620		1886008300	1170	SINGLE	SAMN08929863	Apis_mellifera	RNA-Seq	cDNA	TRANSCRIPTOMIC					mushroom body	NA
SRR7000621		1864338700	1150	SINGLE	SAMN08929862	Apis_mellifera	RNA-Seq	cDNA	TRANSCRIPTOMIC					mushroom body	NA
SRR7000622		2119363300	1311	SINGLE	SAMN08929861	Apis_mellifera	RNA-Seq	cDNA	TRANSCRIPTOMIC					mushroom body	NA
SRR7000623		1958222500	1201	SINGLE	SAMN08929860	Apis_mellifera	RNA-Seq	cDNA	TRANSCRIPTOMIC					mushroom body	NA
SRR7000624		2628576200	1589	SINGLE	SAMN08929859	Apis_mellifera	RNA-Seq	cDNA	TRANSCRIPTOMIC					mushroom body	NA
SRR7000625		1828658400	1112	SINGLE	SAMN08929858	Apis_mellifera	RNA-Seq	cDNA	TRANSCRIPTOMIC					mushroom body	NA
SRR7000626		2984668400	1872	SINGLE	SAMN08929857	Apis_mellifera	RNA-Seq	cDNA	TRANSCRIPTOMIC					mushroom body	NA
SRR7000627		3333214200	2066	SINGLE	SAMN08929856	Apis_mellifera	RNA-Seq	cDNA	TRANSCRIPTOMIC					mushroom body	NA
SRR7000628		2814500600	1728	SINGLE	SAMN08929855	Apis_mellifera	RNA-Seq	cDNA	TRANSCRIPTOMIC					mushroom body	NA
SRR7000629		2371782700	1518	SINGLE	SAMN08929854	Apis_mellifera	RNA-Seq	cDNA	TRANSCRIPTOMIC					mushroom body	NA
SRR7000630		2759160500	1772	SINGLE	SAMN08929921	Apis_mellifera	RNA-Seq	cDNA	TRANSCRIPTOMIC					mushroom body	NA
SRR7000631		2464334000	1573	SINGLE	SAMN08929920	Apis_mellifera	RNA-Seq	cDNA	TRANSCRIPTOMIC					mushroom body	NA
SRR7000632		2459211700	1560	SINGLE	SAMN08929919	Apis_mellifera	RNA-Seq	cDNA	TRANSCRIPTOMIC					mushroom body	NA
SRR7000633		2861842900	1824	SINGLE	SAMN08929918	Apis_mellifera	RNA-Seq	cDNA	TRANSCRIPTOMIC					mushroom body	NA
SRR7000634		2357583700	1479	SINGLE	SAMN08929755	Apis_mellifera	RNA-Seq	cDNA	TRANSCRIPTOMIC					mushroom body	NA
SRR7000635		919612200	572	SINGLE	SAMN08929754	Apis_mellifera	RNA-Seq	cDNA	TRANSCRIPTOMIC					mushroom body	NA
SRR7000636		2070896300	1308	SINGLE	SAMN08929753	Apis_mellifera	RNA-Seq	cDNA	TRANSCRIPTOMIC					mushroom body	NA
SRR7000637		2054170900	1310	SINGLE	SAMN08929752	Apis_mellifera	RNA-Seq	cDNA	TRANSCRIPTOMIC					mushroom body	NA
SRR7000638		2042447600	1301	SINGLE	SAMN08929751	Apis_mellifera	RNA-Seq	cDNA	TRANSCRIPTOMIC					mushroom body	NA
SRR7000639		2074944400	1310	SINGLE	SAMN08929750	Apis_mellifera	RNA-Seq	cDNA	TRANSCRIPTOMIC					mushroom body	NA
SRR7000640		2616079700	1685	SINGLE	SAMN08929749	Apis_mellifera	RNA-Seq	cDNA	TRANSCRIPTOMIC					mushroom body	NA
SRR7000641		2082501000	1341	SINGLE	SAMN08929748	Apis_mellifera	RNA-Seq	cDNA	TRANSCRIPTOMIC					mushroom body	NA
SRR7000642		2144431700	1353	SINGLE	SAMN08929747	Apis_mellifera	RNA-Seq	cDNA	TRANSCRIPTOMIC					mushroom body	NA
SRR7000643		2031794200	1293	SINGLE	SAMN08929746	Apis_mellifera	RNA-Seq	cDNA	TRANSCRIPTOMIC					mushroom body	NA
SRR7000644		1909779700	1212	SINGLE	SAMN08929745	Apis_mellifera	RNA-Seq	cDNA	TRANSCRIPTOMIC					mushroom body	NA
SRR7000645		2154684200	1379	SINGLE	SAMN08929744	Apis_mellifera	RNA-Seq	cDNA	TRANSCRIPTOMIC					mushroom body	NA
SRR7000646		3379128500	2047	SINGLE	SAMN08929738	Apis_mellifera	RNA-Seq	cDNA	TRANSCRIPTOMIC					mushroom body	NA
SRR7000647		2302176100	1400	SINGLE	SAMN08929737	Apis_mellifera	RNA-Seq	cDNA	TRANSCRIPTOMIC					mushroom body	NA
SRR7000648		1554926900	940	SINGLE	SAMN08929736	Apis_mellifera	RNA-Seq	cDNA	TRANSCRIPTOMIC					mushroom body	NA
SRR7000649		1395166700	838	SINGLE	SAMN08929735	Apis_mellifera	RNA-Seq	cDNA	TRANSCRIPTOMIC					mushroom body	NA
SRR7000650		1540571100	931	SINGLE	SAMN08929743	Apis_mellifera	RNA-Seq	cDNA	TRANSCRIPTOMIC					mushroom body	NA
SRR7000651		1545381100	931	SINGLE	SAMN08929742	Apis_mellifera	RNA-Seq	cDNA	TRANSCRIPTOMIC					mushroom body	NA
SRR7000652		2078146300	1331	SINGLE	SAMN08929741	Apis_mellifera	RNA-Seq	cDNA	TRANSCRIPTOMIC					mushroom body	NA
SRR7000653		2619110800	1683	SINGLE	SAMN08929740	Apis_mellifera	RNA-Seq	cDNA	TRANSCRIPTOMIC					mushroom body	NA
SRR7000654		1897378900	1214	SINGLE	SAMN08929739	Apis_mellifera	RNA-Seq	cDNA	TRANSCRIPTOMIC					mushroom body	NA
SRR7000655		2127854000	1354	SINGLE	SAMN08929734	Apis_mellifera	RNA-Seq	cDNA	TRANSCRIPTOMIC					mushroom body	NA
SRR7000656		2397129900	1470	SINGLE	SAMN08929733	Apis_mellifera	RNA-Seq	cDNA	TRANSCRIPTOMIC					mushroom body	NA
SRR7000657		2264764900	1453	SINGLE	SAMN08929732	Apis_mellifera	RNA-Seq	cDNA	TRANSCRIPTOMIC					mushroom body	NA
SRR6901848		723820210	534	PAIRED	SAMN08798466	Apis_mellifera	RNA-Seq	RANDOM PCR	TRANSCRIPTOMIC					abdomen	NA
SRR6901856		1447094289	994	PAIRED	SAMN08798478	Apis_mellifera	RNA-Seq	RANDOM PCR	TRANSCRIPTOMIC					abdomen	NA
SRR6901841		1022161163	760	PAIRED	SAMN08798467	Apis_mellifera	RNA-Seq	RANDOM PCR	TRANSCRIPTOMIC					abdomen	NA
SRR6901857		1228217514	865	PAIRED	SAMN08798479	Apis_mellifera	RNA-Seq	RANDOM PCR	TRANSCRIPTOMIC					abdomen	NA
SRR6901842		1519510638	1107	PAIRED	SAMN08798468	Apis_mellifera	RNA-Seq	RANDOM PCR	TRANSCRIPTOMIC					abdomen	NA
SRR6901858		1652782119	1158	PAIRED	SAMN08798480	Apis_mellifera	RNA-Seq	RANDOM PCR	TRANSCRIPTOMIC					abdomen	NA
SRR6901850		1324574336	981	PAIRED	SAMN08798472	Apis_mellifera	RNA-Seq	RANDOM PCR	TRANSCRIPTOMIC					abdomen	NA
SRR6901861		1376284218	970	PAIRED	SAMN08798484	Apis_mellifera	RNA-Seq	RANDOM PCR	TRANSCRIPTOMIC					abdomen	NA
SRR6901851		1058455164	788	PAIRED	SAMN08798473	Apis_mellifera	RNA-Seq	RANDOM PCR	TRANSCRIPTOMIC					abdomen	NA
SRR6901864		1208034568	851	PAIRED	SAMN08798485	Apis_mellifera	RNA-Seq	RANDOM PCR	TRANSCRIPTOMIC					abdomen	NA
SRR6901852		1073330185	794	PAIRED	SAMN08798474	Apis_mellifera	RNA-Seq	RANDOM PCR	TRANSCRIPTOMIC					abdomen	NA
SRR6901863		1878774061	1298	PAIRED	SAMN08798486	Apis_mellifera	RNA-Seq	RANDOM PCR	TRANSCRIPTOMIC					abdomen	NA
SRR6880263		2146870278	1018	PAIRED	SAMN08767434	Apis_mellifera	RNA-Seq	RANDOM	TRANSCRIPTOMIC	female				fat body	nurse worker
SRR6880262		246436892	141	PAIRED	SAMN08767435	Apis_mellifera	RNA-Seq	RANDOM	TRANSCRIPTOMIC	female				fat body	nurse worker
SRR6880264		1943207655	911	PAIRED	SAMN08767437	Apis_mellifera	RNA-Seq	RANDOM	TRANSCRIPTOMIC	female				fat body	nurse worker
SRR6880257		1671917617	794	PAIRED	SAMN08767438	Apis_mellifera	RNA-Seq	RANDOM	TRANSCRIPTOMIC	female				fat body	nurse worker
SRR6880256		2777531312	1312	PAIRED	SAMN08767439	Apis_mellifera	RNA-Seq	RANDOM	TRANSCRIPTOMIC	female				fat body	nurse worker
SRR6880250		2013968944	950	PAIRED	SAMN08767440	Apis_mellifera	RNA-Seq	RANDOM	TRANSCRIPTOMIC	female				fat body	nurse worker
SRR6880251		2335751151	1096	PAIRED	SAMN08767441	Apis_mellifera	RNA-Seq	RANDOM	TRANSCRIPTOMIC	female				fat body	nurse worker
SRR6880254		2405306548	1153	PAIRED	SAMN08767444	Apis_mellifera	RNA-Seq	RANDOM	TRANSCRIPTOMIC	female				fat body	nurse worker
SRR6880255		2195537315	1032	PAIRED	SAMN08767445	Apis_mellifera	RNA-Seq	RANDOM	TRANSCRIPTOMIC	female				fat body	nurse worker
SRR7000577		2054478000	1325	SINGLE	SAMN08929892	Apis_mellifera	RNA-Seq	cDNA	TRANSCRIPTOMIC					mushroom body	NA
SRR7000578		2111984400	1359	SINGLE	SAMN08929891	Apis_mellifera	RNA-Seq	cDNA	TRANSCRIPTOMIC					mushroom body	NA
SRR7000579		1761921100	1113	SINGLE	SAMN08929890	Apis_mellifera	RNA-Seq	cDNA	TRANSCRIPTOMIC					mushroom body	NA
SRR7000580		1766793300	1115	SINGLE	SAMN08929889	Apis_mellifera	RNA-Seq	cDNA	TRANSCRIPTOMIC					mushroom body	NA
SRR7000581		2237467500	1411	SINGLE	SAMN08929888	Apis_mellifera	RNA-Seq	cDNA	TRANSCRIPTOMIC					mushroom body	NA
SRR7000582		2036792300	1287	SINGLE	SAMN08929887	Apis_mellifera	RNA-Seq	cDNA	TRANSCRIPTOMIC					mushroom body	NA
SRR7000583		2388317200	1504	SINGLE	SAMN08929886	Apis_mellifera	RNA-Seq	cDNA	TRANSCRIPTOMIC					mushroom body	NA
SRR7000584		2009767000	1260	SINGLE	SAMN08929769	Apis_mellifera	RNA-Seq	cDNA	TRANSCRIPTOMIC					mushroom body	NA
SRR7000585		2281508800	1468	SINGLE	SAMN08929768	Apis_mellifera	RNA-Seq	cDNA	TRANSCRIPTOMIC					mushroom body	NA
SRR7000586		2007016600	1298	SINGLE	SAMN08929767	Apis_mellifera	RNA-Seq	cDNA	TRANSCRIPTOMIC					mushroom body	NA
SRR7000587		1928224600	1220	SINGLE	SAMN08929766	Apis_mellifera	RNA-Seq	cDNA	TRANSCRIPTOMIC					mushroom body	NA
SRR7000588		1509956300	959	SINGLE	SAMN08929765	Apis_mellifera	RNA-Seq	cDNA	TRANSCRIPTOMIC					mushroom body	NA
SRR7000589		2666810100	1659	SINGLE	SAMN08929764	Apis_mellifera	RNA-Seq	cDNA	TRANSCRIPTOMIC					mushroom body	NA
SRR7000590		2689039800	1658	SINGLE	SAMN08929763	Apis_mellifera	RNA-Seq	cDNA	TRANSCRIPTOMIC					mushroom body	NA
SRR7000591		2185819500	1360	SINGLE	SAMN08929762	Apis_mellifera	RNA-Seq	cDNA	TRANSCRIPTOMIC					mushroom body	NA
SRR7000592		2737615100	1719	SINGLE	SAMN08929761	Apis_mellifera	RNA-Seq	cDNA	TRANSCRIPTOMIC					mushroom body	NA
SRR7000593		2349583300	1452	SINGLE	SAMN08929760	Apis_mellifera	RNA-Seq	cDNA	TRANSCRIPTOMIC					mushroom body	NA
SRR7000594		1925949200	1209	SINGLE	SAMN08929759	Apis_mellifera	RNA-Seq	cDNA	TRANSCRIPTOMIC					mushroom body	NA
SRR7000595		2348094300	1470	SINGLE	SAMN08929758	Apis_mellifera	RNA-Seq	cDNA	TRANSCRIPTOMIC					mushroom body	NA
SRR7000596		2452492600	1531	SINGLE	SAMN08929757	Apis_mellifera	RNA-Seq	cDNA	TRANSCRIPTOMIC					mushroom body	NA
SRR7000597		2414376000	1540	SINGLE	SAMN08929820	Apis_mellifera	RNA-Seq	cDNA	TRANSCRIPTOMIC					mushroom body	NA
SRR6901845		1141098200	842	PAIRED	SAMN08798463	Apis_mellifera	RNA-Seq	RANDOM PCR	TRANSCRIPTOMIC					abdomen	NA
SRR6901853		1029967193	731	PAIRED	SAMN08798475	Apis_mellifera	RNA-Seq	RANDOM PCR	TRANSCRIPTOMIC					abdomen	NA
SRR6901846		1427738349	1037	PAIRED	SAMN08798464	Apis_mellifera	RNA-Seq	RANDOM PCR	TRANSCRIPTOMIC					abdomen	NA
SRR6901854		1529794057	1061	PAIRED	SAMN08798476	Apis_mellifera	RNA-Seq	RANDOM PCR	TRANSCRIPTOMIC					abdomen	NA
SRR6901847		1256433845	923	PAIRED	SAMN08798465	Apis_mellifera	RNA-Seq	RANDOM PCR	TRANSCRIPTOMIC					abdomen	NA
SRR6901855		1450084239	1009	PAIRED	SAMN08798477	Apis_mellifera	RNA-Seq	RANDOM PCR	TRANSCRIPTOMIC					abdomen	NA
SRR6901859		1948007781	1363	PAIRED	SAMN08798481	Apis_mellifera	RNA-Seq	RANDOM PCR	TRANSCRIPTOMIC					abdomen	NA
SRR6901860		610034967	439	PAIRED	SAMN08798482	Apis_mellifera	RNA-Seq	RANDOM PCR	TRANSCRIPTOMIC					abdomen	NA
SRR6901862		751742119	541	PAIRED	SAMN08798483	Apis_mellifera	RNA-Seq	RANDOM PCR	TRANSCRIPTOMIC					abdomen	NA
SRR6880259		2815506806	1222	PAIRED	SAMN08767430	Apis_mellifera	RNA-Seq	RANDOM	TRANSCRIPTOMIC	female				fat body	nurse worker
SRR6880258		3271225927	1413	PAIRED	SAMN08767431	Apis_mellifera	RNA-Seq	RANDOM	TRANSCRIPTOMIC	female				fat body	nurse worker
SRR6880261		2902056772	1274	PAIRED	SAMN08767432	Apis_mellifera	RNA-Seq	RANDOM	TRANSCRIPTOMIC	female				fat body	nurse worker
SRR6880260		3062620785	1322	PAIRED	SAMN08767433	Apis_mellifera	RNA-Seq	RANDOM	TRANSCRIPTOMIC	female				fat body	nurse worker
SRR6880252		2883893877	1433	PAIRED	SAMN08767446	Apis_mellifera	RNA-Seq	RANDOM	TRANSCRIPTOMIC	female				fat body	nurse worker
SRR6880253		1963671658	928	PAIRED	SAMN08767447	Apis_mellifera	RNA-Seq	RANDOM	TRANSCRIPTOMIC	female				fat body	nurse worker
SRR6901843		829032065	605	PAIRED	SAMN08798469	Apis_mellifera	RNA-Seq	RANDOM PCR	TRANSCRIPTOMIC					abdomen	NA
SRR6901844		350346497	252	PAIRED	SAMN08798470	Apis_mellifera	RNA-Seq	RANDOM PCR	TRANSCRIPTOMIC					abdomen	NA
SRR6901849		1765395383	1291	PAIRED	SAMN08798471	Apis_mellifera	RNA-Seq	RANDOM PCR	TRANSCRIPTOMIC					abdomen	NA
SRR6880274		2517717863	1092	PAIRED	SAMN08767418	Apis_mellifera	RNA-Seq	RANDOM	TRANSCRIPTOMIC	female				fat body	nurse worker
SRR6880275		1784900477	789	PAIRED	SAMN08767419	Apis_mellifera	RNA-Seq	RANDOM	TRANSCRIPTOMIC	female				fat body	nurse worker
SRR6880292		1885731058	819	PAIRED	SAMN08767420	Apis_mellifera	RNA-Seq	RANDOM	TRANSCRIPTOMIC	female				fat body	nurse worker
SRR6880293		2339319739	1014	PAIRED	SAMN08767421	Apis_mellifera	RNA-Seq	RANDOM	TRANSCRIPTOMIC	female				fat body	nurse worker
SRR6880276		2261218662	1052	PAIRED	SAMN08767410	Apis_mellifera	RNA-Seq	RANDOM	TRANSCRIPTOMIC	female				fat body	nurse worker
SRR6880277		2279942076	1067	PAIRED	SAMN08767411	Apis_mellifera	RNA-Seq	RANDOM	TRANSCRIPTOMIC	female				fat body	nurse worker
SRR6880278		2726909801	1290	PAIRED	SAMN08767412	Apis_mellifera	RNA-Seq	RANDOM	TRANSCRIPTOMIC	female				fat body	nurse worker
SRR6880279		2462794019	1167	PAIRED	SAMN08767413	Apis_mellifera	RNA-Seq	RANDOM	TRANSCRIPTOMIC	female				fat body	nurse worker
SRR6880283		1921225656	839	PAIRED	SAMN08767414	Apis_mellifera	RNA-Seq	RANDOM	TRANSCRIPTOMIC	female				fat body	nurse worker
SRR6880280		1859411370	830	PAIRED	SAMN08767415	Apis_mellifera	RNA-Seq	RANDOM	TRANSCRIPTOMIC	female				fat body	nurse worker
SRR6880281		1875101411	838	PAIRED	SAMN08767416	Apis_mellifera	RNA-Seq	RANDOM	TRANSCRIPTOMIC	female				fat body	nurse worker
SRR6880282		1793037051	801	PAIRED	SAMN08767417	Apis_mellifera	RNA-Seq	RANDOM	TRANSCRIPTOMIC	female				fat body	nurse worker
SRR6880265		2578590731	1230	PAIRED	SAMN08767436	Apis_mellifera	RNA-Seq	RANDOM	TRANSCRIPTOMIC	female				fat body	nurse worker
SRR6880296		2044176251	962	PAIRED	SAMN08767442	Apis_mellifera	RNA-Seq	RANDOM	TRANSCRIPTOMIC	female				fat body	nurse worker
SRR6880297		2653736105	1249	PAIRED	SAMN08767443	Apis_mellifera	RNA-Seq	RANDOM	TRANSCRIPTOMIC	female				fat body	nurse worker
SRR6880294		2674751182	1243	PAIRED	SAMN08767422	Apis_mellifera	RNA-Seq	RANDOM	TRANSCRIPTOMIC	female				fat body	nurse worker
SRR6880295		2566589357	1201	PAIRED	SAMN08767423	Apis_mellifera	RNA-Seq	RANDOM	TRANSCRIPTOMIC	female				fat body	nurse worker
SRR6880288		2547507287	1212	PAIRED	SAMN08767424	Apis_mellifera	RNA-Seq	RANDOM	TRANSCRIPTOMIC	female				fat body	nurse worker
SRR6880289		2280472501	1077	PAIRED	SAMN08767425	Apis_mellifera	RNA-Seq	RANDOM	TRANSCRIPTOMIC	female				fat body	nurse worker
SRR6880290		2661688993	1259	PAIRED	SAMN08767426	Apis_mellifera	RNA-Seq	RANDOM	TRANSCRIPTOMIC	female				fat body	nurse worker
SRR6880291		2494748177	1203	PAIRED	SAMN08767427	Apis_mellifera	RNA-Seq	RANDOM	TRANSCRIPTOMIC	female				fat body	nurse worker
SRR6880286		2289129802	1094	PAIRED	SAMN08767428	Apis_mellifera	RNA-Seq	RANDOM	TRANSCRIPTOMIC	female				fat body	nurse worker
SRR6880287		1994381596	936	PAIRED	SAMN08767429	Apis_mellifera	RNA-Seq	RANDOM	TRANSCRIPTOMIC	female				fat body	nurse worker
SRR6880284		2225341174	1046	PAIRED	SAMN08767448	Apis_mellifera	RNA-Seq	RANDOM	TRANSCRIPTOMIC	female				fat body	nurse worker
SRR6880285		2152134070	1032	PAIRED	SAMN08767449	Apis_mellifera	RNA-Seq	RANDOM	TRANSCRIPTOMIC	female				fat body	nurse worker
SRR6880273		2653092593	1266	PAIRED	SAMN08767450	Apis_mellifera	RNA-Seq	RANDOM	TRANSCRIPTOMIC	female				fat body	nurse worker
SRR6880272		2536634024	1216	PAIRED	SAMN08767451	Apis_mellifera	RNA-Seq	RANDOM	TRANSCRIPTOMIC	female				fat body	nurse worker
SRR6880271		2442203717	1151	PAIRED	SAMN08767452	Apis_mellifera	RNA-Seq	RANDOM	TRANSCRIPTOMIC	female				fat body	nurse worker
SRR6880270		2326357744	1102	PAIRED	SAMN08767453	Apis_mellifera	RNA-Seq	RANDOM	TRANSCRIPTOMIC	female				fat body	nurse worker
SRR6880269		2704868877	1313	PAIRED	SAMN08767454	Apis_mellifera	RNA-Seq	RANDOM	TRANSCRIPTOMIC	female				fat body	nurse worker
SRR6880268		2136617552	1009	PAIRED	SAMN08767455	Apis_mellifera	RNA-Seq	RANDOM	TRANSCRIPTOMIC	female				fat body	nurse worker
SRR6880267		2491806437	1159	PAIRED	SAMN08767456	Apis_mellifera	RNA-Seq	RANDOM	TRANSCRIPTOMIC	female				fat body	nurse worker
SRR6880266		2525307598	1184	PAIRED	SAMN08767457	Apis_mellifera	RNA-Seq	RANDOM	TRANSCRIPTOMIC	female				fat body	nurse worker
SRR6793739		8482189800	3128	PAIRED	SAMN08624238	Apis_mellifera	RNA-Seq	PCR	TRANSCRIPTOMIC	female				hypopharyngeal glands	adult bees
SRR6793740		7902892200	3091	PAIRED	SAMN08624239	Apis_mellifera	RNA-Seq	PCR	TRANSCRIPTOMIC	female				hypopharyngeal glands	adult bees
SRR6793741		8051148900	2931	PAIRED	SAMN08624240	Apis_mellifera	RNA-Seq	PCR	TRANSCRIPTOMIC	female				hypopharyngeal glands	adult bees
SRR6793742		8830382700	3437	PAIRED	SAMN08624241	Apis_mellifera	RNA-Seq	PCR	TRANSCRIPTOMIC	female				hypopharyngeal glands	adult bees
SRR6793737		8531065500	3293	PAIRED	SAMN08624242	Apis_mellifera	RNA-Seq	PCR	TRANSCRIPTOMIC	female				hypopharyngeal glands	adult bees
SRR6793738		6802966200	2517	PAIRED	SAMN08624243	Apis_mellifera	RNA-Seq	PCR	TRANSCRIPTOMIC	female				hypopharyngeal glands	adult bees
SRR6727829		1082872814	392	PAIRED	SAMN08537410	Apis_mellifera	RNA-Seq	cDNA	TRANSCRIPTOMIC					Larval Head	NA
SRR6727830		1065175253	385	PAIRED	SAMN08537410	Apis_mellifera	RNA-Seq	cDNA	TRANSCRIPTOMIC					Larval Head	NA
SRR6727831		1094583163	400	PAIRED	SAMN08537410	Apis_mellifera	RNA-Seq	cDNA	TRANSCRIPTOMIC					Larval Head	NA
SRR6727832		1079310172	393	PAIRED	SAMN08537410	Apis_mellifera	RNA-Seq	cDNA	TRANSCRIPTOMIC					Larval Head	NA
SRR6727833		1093918762	392	PAIRED	SAMN08537409	Apis_mellifera	RNA-Seq	cDNA	TRANSCRIPTOMIC					Larval Head	NA
SRR6727834		1082668893	387	PAIRED	SAMN08537409	Apis_mellifera	RNA-Seq	cDNA	TRANSCRIPTOMIC					Larval Head	NA
SRR6727835		1104512224	400	PAIRED	SAMN08537409	Apis_mellifera	RNA-Seq	cDNA	TRANSCRIPTOMIC					Larval Head	NA
SRR6727836		1094490454	395	PAIRED	SAMN08537409	Apis_mellifera	RNA-Seq	cDNA	TRANSCRIPTOMIC					Larval Head	NA
SRR6727837		1015431788	368	PAIRED	SAMN08537408	Apis_mellifera	RNA-Seq	cDNA	TRANSCRIPTOMIC					Larval Head	NA
SRR6727838		1001636385	362	PAIRED	SAMN08537408	Apis_mellifera	RNA-Seq	cDNA	TRANSCRIPTOMIC					Larval Head	NA
SRR6727839		1026996985	376	PAIRED	SAMN08537408	Apis_mellifera	RNA-Seq	cDNA	TRANSCRIPTOMIC					Larval Head	NA
SRR6727840		1012924488	369	PAIRED	SAMN08537408	Apis_mellifera	RNA-Seq	cDNA	TRANSCRIPTOMIC					Larval Head	NA
SRR6727841		1061004050	385	PAIRED	SAMN08537407	Apis_mellifera	RNA-Seq	cDNA	TRANSCRIPTOMIC					Larval Head	NA
SRR6727842		1046586951	378	PAIRED	SAMN08537407	Apis_mellifera	RNA-Seq	cDNA	TRANSCRIPTOMIC					Larval Head	NA
SRR6727843		1073645191	393	PAIRED	SAMN08537407	Apis_mellifera	RNA-Seq	cDNA	TRANSCRIPTOMIC					Larval Head	NA
SRR6727844		1060034465	387	PAIRED	SAMN08537407	Apis_mellifera	RNA-Seq	cDNA	TRANSCRIPTOMIC					Larval Head	NA
SRR6727845		921554634	334	PAIRED	SAMN08537406	Apis_mellifera	RNA-Seq	cDNA	TRANSCRIPTOMIC					Larval Head	NA
SRR6727846		910023534	329	PAIRED	SAMN08537406	Apis_mellifera	RNA-Seq	cDNA	TRANSCRIPTOMIC					Larval Head	NA
SRR6727847		930664919	341	PAIRED	SAMN08537406	Apis_mellifera	RNA-Seq	cDNA	TRANSCRIPTOMIC					Larval Head	NA
SRR6727848		920290891	336	PAIRED	SAMN08537406	Apis_mellifera	RNA-Seq	cDNA	TRANSCRIPTOMIC					Larval Head	NA
SRR6727849		977429531	361	PAIRED	SAMN08537405	Apis_mellifera	RNA-Seq	cDNA	TRANSCRIPTOMIC					Larval Head	NA
SRR6727850		959587532	354	PAIRED	SAMN08537405	Apis_mellifera	RNA-Seq	cDNA	TRANSCRIPTOMIC					Larval Head	NA
SRR6727851		980944236	366	PAIRED	SAMN08537405	Apis_mellifera	RNA-Seq	cDNA	TRANSCRIPTOMIC					Larval Head	NA
SRR6727852		969637698	361	PAIRED	SAMN08537405	Apis_mellifera	RNA-Seq	cDNA	TRANSCRIPTOMIC					Larval Head	NA
SRR6727853		1061392964	388	PAIRED	SAMN08537404	Apis_mellifera	RNA-Seq	cDNA	TRANSCRIPTOMIC					Larval Head	NA
SRR6727854		1043816468	381	PAIRED	SAMN08537404	Apis_mellifera	RNA-Seq	cDNA	TRANSCRIPTOMIC					Larval Head	NA
SRR6727855		1072540193	396	PAIRED	SAMN08537404	Apis_mellifera	RNA-Seq	cDNA	TRANSCRIPTOMIC					Larval Head	NA
SRR6727856		1056668716	389	PAIRED	SAMN08537404	Apis_mellifera	RNA-Seq	cDNA	TRANSCRIPTOMIC					Larval Head	NA
SRR6727857		1032216662	377	PAIRED	SAMN08537403	Apis_mellifera	RNA-Seq	cDNA	TRANSCRIPTOMIC					Larval Head	NA
SRR6727858		1014877757	370	PAIRED	SAMN08537403	Apis_mellifera	RNA-Seq	cDNA	TRANSCRIPTOMIC					Larval Head	NA
SRR6727859		1043276778	385	PAIRED	SAMN08537403	Apis_mellifera	RNA-Seq	cDNA	TRANSCRIPTOMIC					Larval Head	NA
SRR6727860		1027502013	378	PAIRED	SAMN08537403	Apis_mellifera	RNA-Seq	cDNA	TRANSCRIPTOMIC					Larval Head	NA
SRR6489890		6753271452	2382	PAIRED	SAMN08271905	Apis_mellifera	RNA-Seq	RANDOM	TRANSCRIPTOMIC					RNA of the whole pupae	NA
SRR6489891		6190443112	2202	PAIRED	SAMN08271905	Apis_mellifera	RNA-Seq	RANDOM	TRANSCRIPTOMIC					RNA of the whole pupae	NA
SRR6489892		5931063466	2134	PAIRED	SAMN08271905	Apis_mellifera	RNA-Seq	RANDOM	TRANSCRIPTOMIC					RNA of the whole pupae	NA
SRR6489893		6528285378	2328	PAIRED	SAMN08271906	Apis_mellifera	RNA-Seq	RANDOM	TRANSCRIPTOMIC					RNA of the whole pupae	NA
SRR6489894		7595192186	2688	PAIRED	SAMN08271906	Apis_mellifera	RNA-Seq	RANDOM	TRANSCRIPTOMIC					RNA of the whole pupae	NA
SRR6489895		6715327568	2401	PAIRED	SAMN08271906	Apis_mellifera	RNA-Seq	RANDOM	TRANSCRIPTOMIC					RNA of the whole pupae	NA
SRR6489896		6064192314	2158	PAIRED	SAMN08271907	Apis_mellifera	RNA-Seq	RANDOM	TRANSCRIPTOMIC					RNA of the whole pupae	NA
SRR6489897		6638758488	2360	PAIRED	SAMN08271907	Apis_mellifera	RNA-Seq	RANDOM	TRANSCRIPTOMIC					RNA of the whole pupae	NA
SRR6489887		6517720210	2302	PAIRED	SAMN08271907	Apis_mellifera	RNA-Seq	RANDOM	TRANSCRIPTOMIC					RNA of the whole pupae	NA
SRR6489888		8801156404	3074	PAIRED	SAMN08271908	Apis_mellifera	RNA-Seq	RANDOM	TRANSCRIPTOMIC					RNA of the whole pupae	NA
SRR6489919		6420709958	2279	PAIRED	SAMN08271908	Apis_mellifera	RNA-Seq	RANDOM	TRANSCRIPTOMIC					RNA of the whole pupae	NA
SRR6489920		6483667596	2258	PAIRED	SAMN08271908	Apis_mellifera	RNA-Seq	RANDOM	TRANSCRIPTOMIC					RNA of the whole pupae	NA
SRR6489921		5857312348	2106	PAIRED	SAMN08271909	Apis_mellifera	RNA-Seq	RANDOM	TRANSCRIPTOMIC					RNA of the whole pupae	NA
SRR6489922		5532890358	1989	PAIRED	SAMN08271909	Apis_mellifera	RNA-Seq	RANDOM	TRANSCRIPTOMIC					RNA of the whole pupae	NA
SRR6489915		6389275986	2250	PAIRED	SAMN08271909	Apis_mellifera	RNA-Seq	RANDOM	TRANSCRIPTOMIC					RNA of the whole pupae	NA
SRR6489916		6085017630	2120	PAIRED	SAMN08271910	Apis_mellifera	RNA-Seq	RANDOM	TRANSCRIPTOMIC					RNA of the whole pupae	NA
SRR6489917		6844245630	2376	PAIRED	SAMN08271910	Apis_mellifera	RNA-Seq	RANDOM	TRANSCRIPTOMIC					RNA of the whole pupae	NA
SRR6489918		6391180700	2245	PAIRED	SAMN08271910	Apis_mellifera	RNA-Seq	RANDOM	TRANSCRIPTOMIC					RNA of the whole pupae	NA
SRR6059169		654182400	305	SINGLE	SAMN07684523	Apis_mellifera	miRNA-Seq	PCR	TRANSCRIPTOMIC					gut	NA
SRR6059174		677229800	305	SINGLE	SAMN07684524	Apis_mellifera	miRNA-Seq	PCR	TRANSCRIPTOMIC					gut	NA
SRR6059175		685814000	306	SINGLE	SAMN07684525	Apis_mellifera	miRNA-Seq	PCR	TRANSCRIPTOMIC					gut	NA
SRR6059167		717328750	341	SINGLE	SAMN07684529	Apis_mellifera	miRNA-Seq	PCR	TRANSCRIPTOMIC					gut	NA
SRR6059164		743092650	350	SINGLE	SAMN07684530	Apis_mellifera	miRNA-Seq	PCR	TRANSCRIPTOMIC					gut	NA
SRR6059171		727424700	345	SINGLE	SAMN07684531	Apis_mellifera	miRNA-Seq	PCR	TRANSCRIPTOMIC					gut	NA
SRR6059170		701086400	317	SINGLE	SAMN07684520	Apis_mellifera	miRNA-Seq	PCR	TRANSCRIPTOMIC					gut	NA
SRR6059165		673981750	304	SINGLE	SAMN07684521	Apis_mellifera	miRNA-Seq	PCR	TRANSCRIPTOMIC					gut	NA
SRR6059168		651673900	290	SINGLE	SAMN07684522	Apis_mellifera	miRNA-Seq	PCR	TRANSCRIPTOMIC					gut	NA
SRR6059172		686575600	306	SINGLE	SAMN07684526	Apis_mellifera	miRNA-Seq	PCR	TRANSCRIPTOMIC					gut	NA
SRR6059173		659764250	298	SINGLE	SAMN07684527	Apis_mellifera	miRNA-Seq	PCR	TRANSCRIPTOMIC					gut	NA
SRR6059166		716624500	320	SINGLE	SAMN07684528	Apis_mellifera	miRNA-Seq	PCR	TRANSCRIPTOMIC					gut	NA
SRR6047306		8453925600	3103	PAIRED	SAMN06192090	Apis_mellifera	RNA-Seq	cDNA	TRANSCRIPTOMIC					ovaries	NA
SRR6047307		11870477700	4332	PAIRED	SAMN06192089	Apis_mellifera	RNA-Seq	cDNA	TRANSCRIPTOMIC					ovaries	NA
SRR6047308		8366520900	3532	PAIRED	SAMN06192088	Apis_mellifera	RNA-Seq	cDNA	TRANSCRIPTOMIC					ovaries	NA
SRR6047309		9055285200	3819	PAIRED	SAMN06192087	Apis_mellifera	RNA-Seq	cDNA	TRANSCRIPTOMIC					ovaries	NA
SRR6047310		11260662900	4735	PAIRED	SAMN06192086	Apis_mellifera	RNA-Seq	cDNA	TRANSCRIPTOMIC					ovaries	NA
SRR6047311		8783523600	3774	PAIRED	SAMN06192085	Apis_mellifera	RNA-Seq	cDNA	TRANSCRIPTOMIC					ovaries	NA
SRR6047312		8980888200	3884	PAIRED	SAMN06192084	Apis_mellifera	RNA-Seq	cDNA	TRANSCRIPTOMIC					ovaries	NA
SRR6047313		9383217600	4075	PAIRED	SAMN06192083	Apis_mellifera	RNA-Seq	cDNA	TRANSCRIPTOMIC					ovaries	NA
SRR6047314		8500263900	3659	PAIRED	SAMN06192082	Apis_mellifera	RNA-Seq	cDNA	TRANSCRIPTOMIC					ovaries	NA
SRR6047315		8856750000	3767	PAIRED	SAMN06192081	Apis_mellifera	RNA-Seq	cDNA	TRANSCRIPTOMIC					ovaries	NA
SRR6047316		9047212800	3877	PAIRED	SAMN06192080	Apis_mellifera	RNA-Seq	cDNA	TRANSCRIPTOMIC					ovaries	NA
SRR6047317		8858691600	3780	PAIRED	SAMN06192078	Apis_mellifera	RNA-Seq	cDNA	TRANSCRIPTOMIC					ovaries	NA
SRR6031645		24080587200	8832	PAIRED	SAMN07637360	Apis_mellifera	RNA-Seq	PCR	TRANSCRIPTOMIC					gut	NA
SRR6031646		22384621200	8262	PAIRED	SAMN07637361	Apis_mellifera	RNA-Seq	PCR	TRANSCRIPTOMIC					gut	NA
SRR6031647		19707953100	7335	PAIRED	SAMN07637362	Apis_mellifera	RNA-Seq	PCR	TRANSCRIPTOMIC					gut	NA
SRR6031651		37421049900	13826	PAIRED	SAMN07637366	Apis_mellifera	RNA-Seq	PCR	TRANSCRIPTOMIC					gut	NA
SRR6031640		31288474800	11620	PAIRED	SAMN07637367	Apis_mellifera	RNA-Seq	PCR	TRANSCRIPTOMIC					gut	NA
SRR6031641		25964550900	9695	PAIRED	SAMN07637368	Apis_mellifera	RNA-Seq	PCR	TRANSCRIPTOMIC					gut	NA
SRR6031642		24126612300	8854	PAIRED	SAMN07637357	Apis_mellifera	RNA-Seq	PCR	TRANSCRIPTOMIC					gut	NA
SRR6031643		19481729100	7140	PAIRED	SAMN07637358	Apis_mellifera	RNA-Seq	PCR	TRANSCRIPTOMIC					gut	NA
SRR6031644		17052584700	6304	PAIRED	SAMN07637359	Apis_mellifera	RNA-Seq	PCR	TRANSCRIPTOMIC					gut	NA
SRR6031648		22848491700	8397	PAIRED	SAMN07637363	Apis_mellifera	RNA-Seq	PCR	TRANSCRIPTOMIC					gut	NA
SRR6031649		30062684400	11282	PAIRED	SAMN07637364	Apis_mellifera	RNA-Seq	PCR	TRANSCRIPTOMIC					gut	NA
SRR6031650		19000139400	7027	PAIRED	SAMN07637365	Apis_mellifera	RNA-Seq	PCR	TRANSCRIPTOMIC					gut	NA
SRR5907699		4126403200	1672	PAIRED	SAMN07459020	Apis_mellifera	RNA-Seq	RANDOM	TRANSCRIPTOMIC	female				whole body	Pupa
SRR5907698		3926596400	1589	PAIRED	SAMN07459019	Apis_mellifera	RNA-Seq	RANDOM	TRANSCRIPTOMIC	female				whole body	Pupa
SRR5907700		3870970600	1617	PAIRED	SAMN07459021	Apis_mellifera	RNA-Seq	RANDOM	TRANSCRIPTOMIC	female				whole body	Pupa
SRR5907695		3969928600	1601	PAIRED	SAMN07459023	Apis_mellifera	RNA-Seq	RANDOM	TRANSCRIPTOMIC	female				whole body	Pupa
SRR5907691		3129625200	1341	PAIRED	SAMN07459024	Apis_mellifera	RNA-Seq	RANDOM	TRANSCRIPTOMIC	female				whole body	Pupa
SRR5907692		3751672200	1613	PAIRED	SAMN07459022	Apis_mellifera	RNA-Seq	RANDOM	TRANSCRIPTOMIC	female				whole body	Pupa
SRR5907693		3797663400	1557	PAIRED	SAMN07459026	Apis_mellifera	RNA-Seq	RANDOM	TRANSCRIPTOMIC	female				whole body	Pupa
SRR5907690		4096632600	1648	PAIRED	SAMN07459025	Apis_mellifera	RNA-Seq	RANDOM	TRANSCRIPTOMIC	female				whole body	Pupa
SRR5907694		3755091200	1587	PAIRED	SAMN07459027	Apis_mellifera	RNA-Seq	RANDOM	TRANSCRIPTOMIC	female				whole body	Pupa
SRR5907701		3934561000	1700	PAIRED	SAMN07459028	Apis_mellifera	RNA-Seq	RANDOM	TRANSCRIPTOMIC	female				whole body	Pupa
SRR5907702		4203459800	1704	PAIRED	SAMN07459029	Apis_mellifera	RNA-Seq	RANDOM	TRANSCRIPTOMIC	female				whole body	Pupa
SRR5907703		3352098800	1399	PAIRED	SAMN07459030	Apis_mellifera	RNA-Seq	RANDOM	TRANSCRIPTOMIC	female				whole body	Pupa
SRR5907697		3996937000	1633	PAIRED	SAMN07459018	Apis_mellifera	RNA-Seq	RANDOM	TRANSCRIPTOMIC	female				thorax and abdomen	Adult
SRR5136448		14945137500	5729	PAIRED	SAMN06192077	Apis_mellifera	RNA-Seq	cDNA	TRANSCRIPTOMIC					ovaries	NA
SRR5136449		15277318800	5814	PAIRED	SAMN06192076	Apis_mellifera	RNA-Seq	cDNA	TRANSCRIPTOMIC					ovaries	NA
SRR5136450		15624137700	6048	PAIRED	SAMN06192075	Apis_mellifera	RNA-Seq	cDNA	TRANSCRIPTOMIC					ovaries	NA
SRR5136451		14719855500	5590	PAIRED	SAMN06192074	Apis_mellifera	RNA-Seq	cDNA	TRANSCRIPTOMIC					ovaries	NA
SRR5136452		19226659200	7647	PAIRED	SAMN06192073	Apis_mellifera	RNA-Seq	cDNA	TRANSCRIPTOMIC					ovaries	NA
SRR5136453		15024032700	6042	PAIRED	SAMN06192072	Apis_mellifera	RNA-Seq	cDNA	TRANSCRIPTOMIC					ovaries	NA
SRR5136454		14324148600	5846	PAIRED	SAMN06192079	Apis_mellifera	RNA-Seq	cDNA	TRANSCRIPTOMIC					ovaries	NA
SRR5136455		12571501500	4746	PAIRED	SAMN06192071	Apis_mellifera	RNA-Seq	cDNA	TRANSCRIPTOMIC					ovaries	NA
SRR5136456		13536148200	5243	PAIRED	SAMN06192067	Apis_mellifera	RNA-Seq	cDNA	TRANSCRIPTOMIC					ovaries	NA
SRR5136457		15841131300	5981	PAIRED	SAMN06192068	Apis_mellifera	RNA-Seq	cDNA	TRANSCRIPTOMIC					ovaries	NA
SRR5136458		13189447500	5035	PAIRED	SAMN06192069	Apis_mellifera	RNA-Seq	cDNA	TRANSCRIPTOMIC					ovaries	NA
SRR5136459		22267107600	8414	PAIRED	SAMN06192070	Apis_mellifera	RNA-Seq	cDNA	TRANSCRIPTOMIC					ovaries	NA
SRR5907704		3288981800	1325	PAIRED	SAMN07459031	Apis_mellifera	RNA-Seq	RANDOM	TRANSCRIPTOMIC	female				whole body	Pupa
SRR5907696		3526447000	1392	PAIRED	SAMN07459032	Apis_mellifera	RNA-Seq	RANDOM	TRANSCRIPTOMIC	female				whole body	Pupa
SRR5615334		6749629998	2422	PAIRED	SAMN07136317	Apis_mellifera	RNA-Seq	RANDOM	TRANSCRIPTOMIC					Queen germline	NA
SRR5615346		1379527750	409	SINGLE	SAMN07136317	Apis_mellifera	OTHER	size fractionation	TRANSCRIPTOMIC					Queen germline	NA
SRR5615350		1583085150	465	SINGLE	SAMN07136317	Apis_mellifera	OTHER	size fractionation	TRANSCRIPTOMIC					Queen germline	NA
SRR5615351		1238652050	370	SINGLE	SAMN07136318	Apis_mellifera	OTHER	size fractionation	TRANSCRIPTOMIC					Queen thorax	NA
SRR5615347		1301676950	384	SINGLE	SAMN07136318	Apis_mellifera	OTHER	size fractionation	TRANSCRIPTOMIC					Queen thorax	NA
SRR5615335		5901233684	2151	PAIRED	SAMN07136318	Apis_mellifera	RNA-Seq	RANDOM	TRANSCRIPTOMIC					Queen thorax	NA
SRR5615342		6464531934	2358	PAIRED	SAMN07136319	Apis_mellifera	RNA-Seq	RANDOM	TRANSCRIPTOMIC					Drone germline	NA
SRR5615348		1964070300	585	SINGLE	SAMN07136319	Apis_mellifera	OTHER	size fractionation	TRANSCRIPTOMIC					Drone germline	NA
SRR5615344		1560820850	459	SINGLE	SAMN07136319	Apis_mellifera	OTHER	size fractionation	TRANSCRIPTOMIC					Drone germline	NA
SRR5615345		1393932700	411	SINGLE	SAMN07136320	Apis_mellifera	OTHER	size fractionation	TRANSCRIPTOMIC					Drone thorax	NA
SRR5615349		1495096450	442	SINGLE	SAMN07136320	Apis_mellifera	OTHER	size fractionation	TRANSCRIPTOMIC					Drone thorax	NA
SRR5615343		3141339494	1238	PAIRED	SAMN07136320	Apis_mellifera	RNA-Seq	RANDOM	TRANSCRIPTOMIC					Drone thorax	NA
SRR5534311		9097378943	4220	PAIRED	SAMN06928121	Apis_mellifera	RNA-Seq	cDNA	TRANSCRIPTOMIC	female				Head	Adult
SRR5534312		10635071445	4911	PAIRED	SAMN06928121	Apis_mellifera	RNA-Seq	cDNA	TRANSCRIPTOMIC	female				Head	Adult
SRR5534313		9413917537	4363	PAIRED	SAMN06928121	Apis_mellifera	RNA-Seq	cDNA	TRANSCRIPTOMIC	female				Head	Adult
SRR5534314		11361638258	5272	PAIRED	SAMN06928121	Apis_mellifera	RNA-Seq	cDNA	TRANSCRIPTOMIC	female				Head	Adult
SRR5387735		4726062300	2027	PAIRED	SAMN06640538	Apis_mellifera	RNA-Seq	PolyA	TRANSCRIPTOMIC	female				whole body	adult
SRR5387737		3611567100	1541	PAIRED	SAMN06640539	Apis_mellifera	RNA-Seq	PolyA	TRANSCRIPTOMIC	female				whole body	adult
SRR5387738		3980775300	1695	PAIRED	SAMN06640540	Apis_mellifera	RNA-Seq	PolyA	TRANSCRIPTOMIC	female				whole body	adult
SRR5383937		4939606800	2115	PAIRED	SAMN06640218	Apis_mellifera	RNA-Seq	PolyA	TRANSCRIPTOMIC	female				whole body	adult
SRR5383939		4056166500	1733	PAIRED	SAMN06640536	Apis_mellifera	RNA-Seq	PolyA	TRANSCRIPTOMIC	female				whole body	adult
SRR5383927		5209827000	2225	PAIRED	SAMN06640537	Apis_mellifera	RNA-Seq	PolyA	TRANSCRIPTOMIC	female				whole body	adult
SRR5252792		984195288	520	SINGLE	SAMN06329936	Apis_mellifera	RNA-Seq	cDNA	TRANSCRIPTOMIC					whole body	NA
SRR5252793		656107992	321	SINGLE	SAMN06329935	Apis_mellifera	RNA-Seq	cDNA	TRANSCRIPTOMIC					whole body	NA
SRR5252794		888593076	446	SINGLE	SAMN06329938	Apis_mellifera	RNA-Seq	cDNA	TRANSCRIPTOMIC					whole body	NA
SRR5252795		717376320	358	SINGLE	SAMN06329937	Apis_mellifera	RNA-Seq	cDNA	TRANSCRIPTOMIC					whole body	NA
SRR5252796		601439976	287	SINGLE	SAMN06329934	Apis_mellifera	RNA-Seq	cDNA	TRANSCRIPTOMIC					whole body	NA
SRR5252797		936257328	486	SINGLE	SAMN06329933	Apis_mellifera	RNA-Seq	cDNA	TRANSCRIPTOMIC					whole body	NA
SRR5252798		997661412	552	SINGLE	SAMN06329932	Apis_mellifera	RNA-Seq	cDNA	TRANSCRIPTOMIC					whole body	NA
SRR5252799		388970604	180	SINGLE	SAMN06329931	Apis_mellifera	RNA-Seq	cDNA	TRANSCRIPTOMIC					whole body	NA
SRR5252800		552396024	256	SINGLE	SAMN06329930	Apis_mellifera	RNA-Seq	cDNA	TRANSCRIPTOMIC					whole body	NA
SRR5252801		998369640	533	SINGLE	SAMN06329929	Apis_mellifera	RNA-Seq	cDNA	TRANSCRIPTOMIC					whole body	NA
SRR5252802		765381564	366	SINGLE	SAMN06329928	Apis_mellifera	RNA-Seq	cDNA	TRANSCRIPTOMIC					whole body	NA
SRR5252803		1188450468	634	SINGLE	SAMN06329927	Apis_mellifera	RNA-Seq	cDNA	TRANSCRIPTOMIC					whole body	NA
SRR5252804		1091274336	570	SINGLE	SAMN06329926	Apis_mellifera	RNA-Seq	cDNA	TRANSCRIPTOMIC					whole body	NA
SRR5252805		917022168	467	SINGLE	SAMN06329925	Apis_mellifera	RNA-Seq	cDNA	TRANSCRIPTOMIC					whole body	NA
SRR5252806		877074840	432	SINGLE	SAMN06329924	Apis_mellifera	RNA-Seq	cDNA	TRANSCRIPTOMIC					whole body	NA
SRR5223580		19859883750	10576	PAIRED	SAMN06289196	Apis_mellifera	RNA-Seq	RT-PCR	TRANSCRIPTOMIC	not collected				brain	newly eclosing bee
SRR5223579		20977740250	11226	PAIRED	SAMN06289197	Apis_mellifera	RNA-Seq	RT-PCR	TRANSCRIPTOMIC	not collected				hypopharyngeal gland	newly eclosing bee
SRR5223582		21049123500	11042	PAIRED	SAMN06289194	Apis_mellifera	RNA-Seq	RT-PCR	TRANSCRIPTOMIC	not collected				brain	forager
SRR5223581		19898274750	10657	PAIRED	SAMN06289195	Apis_mellifera	RNA-Seq	RT-PCR	TRANSCRIPTOMIC	not collected				hypopharyngeal gland	forager
SRR5188641		575411000	305	SINGLE	SAMN06242039	Apis_mellifera	miRNA-Seq	size fractionation	TRANSCRIPTOMIC					ovaries	NA
SRR5188642		544320650	296	SINGLE	SAMN06242038	Apis_mellifera	miRNA-Seq	size fractionation	TRANSCRIPTOMIC					ovaries	NA
SRR5188643		550939100	290	SINGLE	SAMN06242037	Apis_mellifera	miRNA-Seq	size fractionation	TRANSCRIPTOMIC					ovaries	NA
SRR5188644		616856900	322	SINGLE	SAMN06242036	Apis_mellifera	miRNA-Seq	size fractionation	TRANSCRIPTOMIC					ovaries	NA
SRR5188645		631127600	321	SINGLE	SAMN06242035	Apis_mellifera	miRNA-Seq	size fractionation	TRANSCRIPTOMIC					ovaries	NA
SRR5188646		656325400	338	SINGLE	SAMN06242034	Apis_mellifera	miRNA-Seq	size fractionation	TRANSCRIPTOMIC					ovaries	NA
SRR5188647		628495250	321	SINGLE	SAMN06242033	Apis_mellifera	miRNA-Seq	size fractionation	TRANSCRIPTOMIC					ovaries	NA
SRR5188648		624035600	290	SINGLE	SAMN06242032	Apis_mellifera	miRNA-Seq	size fractionation	TRANSCRIPTOMIC					ovaries	NA
SRR5188649		729363500	391	SINGLE	SAMN06242031	Apis_mellifera	miRNA-Seq	size fractionation	TRANSCRIPTOMIC					ovaries	NA
SRR5188650		643127700	343	SINGLE	SAMN06242030	Apis_mellifera	miRNA-Seq	size fractionation	TRANSCRIPTOMIC					ovaries	NA
SRR5188651		765075600	334	SINGLE	SAMN06242029	Apis_mellifera	miRNA-Seq	size fractionation	TRANSCRIPTOMIC					ovaries	NA
SRR5188652		667899950	347	SINGLE	SAMN06242028	Apis_mellifera	miRNA-Seq	size fractionation	TRANSCRIPTOMIC					ovaries	NA
SRR5116308		4775100624	3139	PAIRED	SAMN06159579	Apis_mellifera	RNA-Seq	size fractionation	TRANSCRIPTOMIC	female				total individuals	adult
SRR5116305		5028666578	3332	PAIRED	SAMN06159577	Apis_mellifera	RNA-Seq	size fractionation	TRANSCRIPTOMIC	female				total individuals	adult
SRR5116307		2869929746	1905	PAIRED	SAMN06159580	Apis_mellifera	RNA-Seq	size fractionation	TRANSCRIPTOMIC	female				total individual	adult
SRR5116304		2417862432	1573	PAIRED	SAMN06159578	Apis_mellifera	RNA-Seq	size fractionation	TRANSCRIPTOMIC	female				total individual	adult
SRR5116306		4975781160	3340	PAIRED	SAMN06159582	Apis_mellifera	RNA-Seq	size fractionation	TRANSCRIPTOMIC	female				total individual	adult
SRR5116303		2794877454	1864	PAIRED	SAMN06159581	Apis_mellifera	RNA-Seq	size fractionation	TRANSCRIPTOMIC	female				total individuals	adult
SRR5109829		9078759800	2884	PAIRED	SAMN06140204	Apis_mellifera	RNA-Seq	RANDOM	TRANSCRIPTOMIC					thorax and abdomen	Adult
SRR5109823		8683753000	2714	PAIRED	SAMN06140203	Apis_mellifera	RNA-Seq	RANDOM	TRANSCRIPTOMIC					thorax and abdomen	Adult
SRR5109833		4103046000	1768	PAIRED	SAMN06140206	Apis_mellifera	RNA-Seq	RANDOM	TRANSCRIPTOMIC					thorax and abdomen	Adult
SRR5109831		3764015600	1581	PAIRED	SAMN06140205	Apis_mellifera	RNA-Seq	RANDOM	TRANSCRIPTOMIC					thorax and abdomen	Adult
SRR5109832		8946224600	2889	PAIRED	SAMN06140208	Apis_mellifera	RNA-Seq	RANDOM	TRANSCRIPTOMIC					thorax and abdomen	Adult
SRR5109826		8404458200	2704	PAIRED	SAMN06140209	Apis_mellifera	RNA-Seq	RANDOM	TRANSCRIPTOMIC					thorax and abdomen	Adult
SRR5109828		4228349200	1814	PAIRED	SAMN06140212	Apis_mellifera	RNA-Seq	RANDOM	TRANSCRIPTOMIC					thorax	Adult
SRR5109834		3840684600	1617	PAIRED	SAMN06140213	Apis_mellifera	RNA-Seq	RANDOM	TRANSCRIPTOMIC					thorax	Adult
SRR5109822		3731670600	1563	PAIRED	SAMN06140210	Apis_mellifera	RNA-Seq	RANDOM	TRANSCRIPTOMIC					thorax	Adult
SRR5109824		1414062900	620	SINGLE	SAMN06140216	Apis_mellifera	miRNA-Seq	RANDOM	TRANSCRIPTOMIC					thorax and abdomen	Adult
SRR5109835		1215492800	529	SINGLE	SAMN06140215	Apis_mellifera	miRNA-Seq	RANDOM	TRANSCRIPTOMIC					thorax and abdomen	Adult
SRR5109830		1379959950	597	SINGLE	SAMN06140217	Apis_mellifera	miRNA-Seq	RANDOM	TRANSCRIPTOMIC					thorax and abdomen	Adult
SRR5109820		4021443800	1681	PAIRED	SAMN06140207	Apis_mellifera	RNA-Seq	RANDOM	TRANSCRIPTOMIC					thorax and abdomen	Adult
SRR5109821		4261883800	1781	PAIRED	SAMN06140211	Apis_mellifera	RNA-Seq	RANDOM	TRANSCRIPTOMIC					thorax	Adult
SRR5109819		1202033000	529	SINGLE	SAMN06140214	Apis_mellifera	miRNA-Seq	RANDOM	TRANSCRIPTOMIC					thorax and abdomen	Adult
SRR5041700		304088750	178	PAIRED	SAMN04516665	Apis_mellifera	RNA-Seq	PolyA	TRANSCRIPTOMIC	female				brain	L3
SRR4897308		1800000006	1730	PAIRED	SAMN05969697	Apis_mellifera	RNA-Seq	size fractionation	TRANSCRIPTOMIC	female				Whole	4 days
SRR4250143		3057192900	1105	SINGLE	SAMN05781365	Apis_mellifera	RNA-Seq	cDNA	TRANSCRIPTOMIC					brain	NA
SRR4250144		3412483500	1230	SINGLE	SAMN05781364	Apis_mellifera	RNA-Seq	cDNA	TRANSCRIPTOMIC					brain	NA
SRR4250145		3425798600	1239	SINGLE	SAMN05781363	Apis_mellifera	RNA-Seq	cDNA	TRANSCRIPTOMIC					brain	NA
SRR4250146		3301027900	1183	SINGLE	SAMN05781362	Apis_mellifera	RNA-Seq	cDNA	TRANSCRIPTOMIC					brain	NA
SRR4250147		3401866000	1219	SINGLE	SAMN05781361	Apis_mellifera	RNA-Seq	cDNA	TRANSCRIPTOMIC					brain	NA
SRR4250148		3265822300	1170	SINGLE	SAMN05781360	Apis_mellifera	RNA-Seq	cDNA	TRANSCRIPTOMIC					brain	NA
SRR4250149		3376522500	1210	SINGLE	SAMN05781359	Apis_mellifera	RNA-Seq	cDNA	TRANSCRIPTOMIC					brain	NA
SRR4250150		3124197000	1122	SINGLE	SAMN05781358	Apis_mellifera	RNA-Seq	cDNA	TRANSCRIPTOMIC					brain	NA
SRR4250151		3524724900	1265	SINGLE	SAMN05781357	Apis_mellifera	RNA-Seq	cDNA	TRANSCRIPTOMIC					brain	NA
SRR4250152		4925529800	2381	SINGLE	SAMN05781356	Apis_mellifera	RNA-Seq	cDNA	TRANSCRIPTOMIC					brain	NA
SRR4250153		4381522000	2133	SINGLE	SAMN05781355	Apis_mellifera	RNA-Seq	cDNA	TRANSCRIPTOMIC					brain	NA
SRR4250154		4008805600	1971	SINGLE	SAMN05781354	Apis_mellifera	RNA-Seq	cDNA	TRANSCRIPTOMIC					brain	NA
SRR4250155		3398968500	1217	SINGLE	SAMN05781353	Apis_mellifera	RNA-Seq	cDNA	TRANSCRIPTOMIC					brain	NA
SRR4250156		3229968000	1173	SINGLE	SAMN05781352	Apis_mellifera	RNA-Seq	cDNA	TRANSCRIPTOMIC					brain	NA
SRR4250157		3351368500	1219	SINGLE	SAMN05781351	Apis_mellifera	RNA-Seq	cDNA	TRANSCRIPTOMIC					brain	NA
SRR4250158		3133719800	1125	SINGLE	SAMN05781350	Apis_mellifera	RNA-Seq	cDNA	TRANSCRIPTOMIC					brain	NA
SRR4250159		3544164400	1286	SINGLE	SAMN05781349	Apis_mellifera	RNA-Seq	cDNA	TRANSCRIPTOMIC					brain	NA
SRR4250160		3432020100	1246	SINGLE	SAMN05781348	Apis_mellifera	RNA-Seq	cDNA	TRANSCRIPTOMIC					brain	NA
SRR4250161		3309366800	1201	SINGLE	SAMN05781347	Apis_mellifera	RNA-Seq	cDNA	TRANSCRIPTOMIC					brain	NA
SRR4250162		3234327300	1171	SINGLE	SAMN05781346	Apis_mellifera	RNA-Seq	cDNA	TRANSCRIPTOMIC					brain	NA
SRR4250163		2848915200	1026	SINGLE	SAMN05781345	Apis_mellifera	RNA-Seq	cDNA	TRANSCRIPTOMIC					brain	NA
SRR4250164		3328642400	1197	SINGLE	SAMN05781344	Apis_mellifera	RNA-Seq	cDNA	TRANSCRIPTOMIC					brain	NA
SRR4250165		3215530200	1157	SINGLE	SAMN05781343	Apis_mellifera	RNA-Seq	cDNA	TRANSCRIPTOMIC					brain	NA
SRR4250166		3147291500	1138	SINGLE	SAMN05781342	Apis_mellifera	RNA-Seq	cDNA	TRANSCRIPTOMIC					brain	NA
SRR4250167		3251933700	1168	SINGLE	SAMN05781341	Apis_mellifera	RNA-Seq	cDNA	TRANSCRIPTOMIC					brain	NA
SRR4250168		3906722600	1404	SINGLE	SAMN05781340	Apis_mellifera	RNA-Seq	cDNA	TRANSCRIPTOMIC					brain	NA
SRR4250169		3050774100	1108	SINGLE	SAMN05781339	Apis_mellifera	RNA-Seq	cDNA	TRANSCRIPTOMIC					brain	NA
SRR4250170		2990012900	1075	SINGLE	SAMN05781338	Apis_mellifera	RNA-Seq	cDNA	TRANSCRIPTOMIC					brain	NA
SRR4250171		3452232400	1241	SINGLE	SAMN05781337	Apis_mellifera	RNA-Seq	cDNA	TRANSCRIPTOMIC					brain	NA
SRR4250172		3224736700	1167	SINGLE	SAMN05781336	Apis_mellifera	RNA-Seq	cDNA	TRANSCRIPTOMIC					brain	NA
SRR4250173		3570793800	1264	SINGLE	SAMN05781335	Apis_mellifera	RNA-Seq	cDNA	TRANSCRIPTOMIC					brain	NA
SRR4250174		3565016200	1265	SINGLE	SAMN05781334	Apis_mellifera	RNA-Seq	cDNA	TRANSCRIPTOMIC					brain	NA
SRR4250175		3488391300	1243	SINGLE	SAMN05781333	Apis_mellifera	RNA-Seq	cDNA	TRANSCRIPTOMIC					brain	NA
SRR4250176		3505504800	1253	SINGLE	SAMN05781332	Apis_mellifera	RNA-Seq	cDNA	TRANSCRIPTOMIC					brain	NA
SRR4250177		3176828800	1154	SINGLE	SAMN05781331	Apis_mellifera	RNA-Seq	cDNA	TRANSCRIPTOMIC					brain	NA
SRR4250178		3446852900	1247	SINGLE	SAMN05781330	Apis_mellifera	RNA-Seq	cDNA	TRANSCRIPTOMIC					brain	NA
SRR4343845		430056429	228	SINGLE	SAMN05862063	Apis_mellifera	RNA-Seq	cDNA	TRANSCRIPTOMIC	female				brain	adult
SRR4343846		392229627	215	SINGLE	SAMN05862063	Apis_mellifera	RNA-Seq	cDNA	TRANSCRIPTOMIC	female				brain	adult
SRR4343848		1494636444	575	PAIRED	SAMN05862065	Apis_mellifera	RNA-Seq	cDNA	TRANSCRIPTOMIC	female				brain	adult
SRR4343847		1472644908	560	PAIRED	SAMN05862064	Apis_mellifera	RNA-Seq	cDNA	TRANSCRIPTOMIC	female				brain	adult
SRR4084095		3779724500	1322	PAIRED	SAMN05615004	Apis_mellifera	RNA-Seq	PCR	TRANSCRIPTOMIC					gut	NA
SRR4084096		3596858000	1257	PAIRED	SAMN05615005	Apis_mellifera	RNA-Seq	PCR	TRANSCRIPTOMIC					gut	NA
SRR4084097		3695615500	1287	PAIRED	SAMN05615006	Apis_mellifera	RNA-Seq	PCR	TRANSCRIPTOMIC					gut	NA
SRR4084098		3777229000	1270	PAIRED	SAMN05615007	Apis_mellifera	RNA-Seq	PCR	TRANSCRIPTOMIC					gut	NA
SRR4084099		5904396500	1996	PAIRED	SAMN05615008	Apis_mellifera	RNA-Seq	PCR	TRANSCRIPTOMIC					gut	NA
SRR4084100		3339454750	1173	PAIRED	SAMN05615009	Apis_mellifera	RNA-Seq	PCR	TRANSCRIPTOMIC					gut	NA
SRR4084101		3568117750	1204	PAIRED	SAMN05615010	Apis_mellifera	RNA-Seq	PCR	TRANSCRIPTOMIC					gut	NA
SRR4084102		4096123500	1427	PAIRED	SAMN05615011	Apis_mellifera	RNA-Seq	PCR	TRANSCRIPTOMIC					gut	NA
SRR4084093		3691759250	1307	PAIRED	SAMN05615012	Apis_mellifera	RNA-Seq	PCR	TRANSCRIPTOMIC					gut	NA
SRR4084094		3828641500	1356	PAIRED	SAMN05615013	Apis_mellifera	RNA-Seq	PCR	TRANSCRIPTOMIC					gut	NA
SRR4084091		4345321000	1476	PAIRED	SAMN05615002	Apis_mellifera	RNA-Seq	PCR	TRANSCRIPTOMIC					gut	NA
SRR4084092		4062183500	1369	PAIRED	SAMN05615003	Apis_mellifera	RNA-Seq	PCR	TRANSCRIPTOMIC					gut	NA
SRR4045816		2881713300	1716	SINGLE	SAMN05601288	Apis_mellifera	RNA-Seq	cDNA	TRANSCRIPTOMIC					NA	NA
SRR4045817		3663051800	2232	SINGLE	SAMN05601287	Apis_mellifera	RNA-Seq	cDNA	TRANSCRIPTOMIC					NA	NA
SRR4045818		3514342700	2145	SINGLE	SAMN05601208	Apis_mellifera	RNA-Seq	cDNA	TRANSCRIPTOMIC					NA	NA
SRR4045819		3122345300	1877	SINGLE	SAMN05601207	Apis_mellifera	RNA-Seq	cDNA	TRANSCRIPTOMIC					NA	NA
SRR4045820		2279272000	1353	SINGLE	SAMN05601206	Apis_mellifera	RNA-Seq	cDNA	TRANSCRIPTOMIC					NA	NA
SRR4045821		2112567800	1255	SINGLE	SAMN05601205	Apis_mellifera	RNA-Seq	cDNA	TRANSCRIPTOMIC					NA	NA
SRR4045822		2238092400	1329	SINGLE	SAMN05601204	Apis_mellifera	RNA-Seq	cDNA	TRANSCRIPTOMIC					NA	NA
SRR4045823		2096679200	1246	SINGLE	SAMN05601203	Apis_mellifera	RNA-Seq	cDNA	TRANSCRIPTOMIC					NA	NA
SRR4045824		2448591000	1433	SINGLE	SAMN05601202	Apis_mellifera	RNA-Seq	cDNA	TRANSCRIPTOMIC					NA	NA
SRR4045825		2269202600	1343	SINGLE	SAMN05601201	Apis_mellifera	RNA-Seq	cDNA	TRANSCRIPTOMIC					NA	NA
SRR4045826		2101266500	1279	SINGLE	SAMN05601200	Apis_mellifera	RNA-Seq	cDNA	TRANSCRIPTOMIC					NA	NA
SRR4045827		2343780700	1403	SINGLE	SAMN05601199	Apis_mellifera	RNA-Seq	cDNA	TRANSCRIPTOMIC					NA	NA
SRR4045828		2252901500	1355	SINGLE	SAMN05601198	Apis_mellifera	RNA-Seq	cDNA	TRANSCRIPTOMIC					NA	NA
SRR4045829		2045805400	1218	SINGLE	SAMN05601197	Apis_mellifera	RNA-Seq	cDNA	TRANSCRIPTOMIC					NA	NA
SRR4045830		2371991100	1403	SINGLE	SAMN05601196	Apis_mellifera	RNA-Seq	cDNA	TRANSCRIPTOMIC					NA	NA
SRR4045831		2301437600	1371	SINGLE	SAMN05601195	Apis_mellifera	RNA-Seq	cDNA	TRANSCRIPTOMIC					NA	NA
SRR4045832		2423672400	1442	SINGLE	SAMN05601194	Apis_mellifera	RNA-Seq	cDNA	TRANSCRIPTOMIC					NA	NA
SRR4045833		2389968900	1425	SINGLE	SAMN05601193	Apis_mellifera	RNA-Seq	cDNA	TRANSCRIPTOMIC					NA	NA
SRR4045834		2285942600	1370	SINGLE	SAMN05601192	Apis_mellifera	RNA-Seq	cDNA	TRANSCRIPTOMIC					NA	NA
SRR4045835		2659574900	1585	SINGLE	SAMN05601191	Apis_mellifera	RNA-Seq	cDNA	TRANSCRIPTOMIC					NA	NA
SRR4045836		2449518400	1428	SINGLE	SAMN05601190	Apis_mellifera	RNA-Seq	cDNA	TRANSCRIPTOMIC					NA	NA
SRR4045837		2262834600	1313	SINGLE	SAMN05601189	Apis_mellifera	RNA-Seq	cDNA	TRANSCRIPTOMIC					NA	NA
SRR4045838		2640636600	1587	SINGLE	SAMN05601367	Apis_mellifera	RNA-Seq	cDNA	TRANSCRIPTOMIC					NA	NA
SRR4045839		3003691900	1853	SINGLE	SAMN05601366	Apis_mellifera	RNA-Seq	cDNA	TRANSCRIPTOMIC					NA	NA
SRR4045840		2991245300	1804	SINGLE	SAMN05601365	Apis_mellifera	RNA-Seq	cDNA	TRANSCRIPTOMIC					NA	NA
SRR4045841		3345278700	2018	SINGLE	SAMN05601364	Apis_mellifera	RNA-Seq	cDNA	TRANSCRIPTOMIC					NA	NA
SRR4045842		2865075900	1741	SINGLE	SAMN05601363	Apis_mellifera	RNA-Seq	cDNA	TRANSCRIPTOMIC					NA	NA
SRR4045843		3018929600	1877	SINGLE	SAMN05601188	Apis_mellifera	RNA-Seq	cDNA	TRANSCRIPTOMIC					NA	NA
SRR4045844		2621643100	1565	SINGLE	SAMN05601332	Apis_mellifera	RNA-Seq	cDNA	TRANSCRIPTOMIC					NA	NA
SRR4045845		2928202000	1794	SINGLE	SAMN05601331	Apis_mellifera	RNA-Seq	cDNA	TRANSCRIPTOMIC					NA	NA
SRR4045846		2822817200	1736	SINGLE	SAMN05601330	Apis_mellifera	RNA-Seq	cDNA	TRANSCRIPTOMIC					NA	NA
SRR4045847		2698820400	1623	SINGLE	SAMN05601329	Apis_mellifera	RNA-Seq	cDNA	TRANSCRIPTOMIC					NA	NA
SRR4045848		2906224200	1762	SINGLE	SAMN05601328	Apis_mellifera	RNA-Seq	cDNA	TRANSCRIPTOMIC					NA	NA
SRR4045849		3061487900	1849	SINGLE	SAMN05601327	Apis_mellifera	RNA-Seq	cDNA	TRANSCRIPTOMIC					NA	NA
SRR4045850		2532038500	1514	SINGLE	SAMN05601326	Apis_mellifera	RNA-Seq	cDNA	TRANSCRIPTOMIC					NA	NA
SRR4045851		2193083200	1310	SINGLE	SAMN05601325	Apis_mellifera	RNA-Seq	cDNA	TRANSCRIPTOMIC					NA	NA
SRR4045852		2380593800	1399	SINGLE	SAMN05601318	Apis_mellifera	RNA-Seq	cDNA	TRANSCRIPTOMIC					NA	NA
SRR4045853		2198488000	1307	SINGLE	SAMN05601317	Apis_mellifera	RNA-Seq	cDNA	TRANSCRIPTOMIC					NA	NA
SRR4045854		2491080700	1523	SINGLE	SAMN05601324	Apis_mellifera	RNA-Seq	cDNA	TRANSCRIPTOMIC					NA	NA
SRR4045855		2308186400	1378	SINGLE	SAMN05601323	Apis_mellifera	RNA-Seq	cDNA	TRANSCRIPTOMIC					NA	NA
SRR4045856		2624910900	1569	SINGLE	SAMN05601322	Apis_mellifera	RNA-Seq	cDNA	TRANSCRIPTOMIC					NA	NA
SRR4045857		2402432200	1423	SINGLE	SAMN05601321	Apis_mellifera	RNA-Seq	cDNA	TRANSCRIPTOMIC					NA	NA
SRR4045858		2567883900	1530	SINGLE	SAMN05601320	Apis_mellifera	RNA-Seq	cDNA	TRANSCRIPTOMIC					NA	NA
SRR4045859		2388146700	1414	SINGLE	SAMN05601319	Apis_mellifera	RNA-Seq	cDNA	TRANSCRIPTOMIC					NA	NA
SRR4063653		47552703143	20113	PAIRED	SAMN04450256	Apis_mellifera	RNA-Seq	cDNA	TRANSCRIPTOMIC					head,chest	NA
SRR4045756		2777847800	1711	SINGLE	SAMN05601343	Apis_mellifera	RNA-Seq	cDNA	TRANSCRIPTOMIC					NA	NA
SRR4045757		2576071900	1559	SINGLE	SAMN05601342	Apis_mellifera	RNA-Seq	cDNA	TRANSCRIPTOMIC					NA	NA
SRR4045758		2746404200	1671	SINGLE	SAMN05601340	Apis_mellifera	RNA-Seq	cDNA	TRANSCRIPTOMIC					NA	NA
SRR4045759		3053609100	1850	SINGLE	SAMN05601339	Apis_mellifera	RNA-Seq	cDNA	TRANSCRIPTOMIC					NA	NA
SRR4045760		2548156600	1521	SINGLE	SAMN05601338	Apis_mellifera	RNA-Seq	cDNA	TRANSCRIPTOMIC					NA	NA
SRR4045761		2902760400	1728	SINGLE	SAMN05601337	Apis_mellifera	RNA-Seq	cDNA	TRANSCRIPTOMIC					NA	NA
SRR4045762		2475995400	1451	SINGLE	SAMN05601336	Apis_mellifera	RNA-Seq	cDNA	TRANSCRIPTOMIC					NA	NA
SRR4045763		2088019100	1244	SINGLE	SAMN05601335	Apis_mellifera	RNA-Seq	cDNA	TRANSCRIPTOMIC					NA	NA
SRR4045764		2734260700	1663	SINGLE	SAMN05601341	Apis_mellifera	RNA-Seq	cDNA	TRANSCRIPTOMIC					NA	NA
SRR4045765		2454182400	1470	SINGLE	SAMN05601334	Apis_mellifera	RNA-Seq	cDNA	TRANSCRIPTOMIC					NA	NA
SRR4045766		2543534700	1520	SINGLE	SAMN05601333	Apis_mellifera	RNA-Seq	cDNA	TRANSCRIPTOMIC					NA	NA
SRR4045767		2313454700	1371	SINGLE	SAMN05601286	Apis_mellifera	RNA-Seq	cDNA	TRANSCRIPTOMIC					NA	NA
SRR4045768		2233729800	1331	SINGLE	SAMN05601285	Apis_mellifera	RNA-Seq	cDNA	TRANSCRIPTOMIC					NA	NA
SRR4045769		2430521400	1446	SINGLE	SAMN05601284	Apis_mellifera	RNA-Seq	cDNA	TRANSCRIPTOMIC					NA	NA
SRR4045770		2315219200	1380	SINGLE	SAMN05601283	Apis_mellifera	RNA-Seq	cDNA	TRANSCRIPTOMIC					NA	NA
SRR4045771		2672377000	1620	SINGLE	SAMN05601282	Apis_mellifera	RNA-Seq	cDNA	TRANSCRIPTOMIC					NA	NA
SRR4045772		2741175600	1680	SINGLE	SAMN05601281	Apis_mellifera	RNA-Seq	cDNA	TRANSCRIPTOMIC					NA	NA
SRR4045773		2220114400	1334	SINGLE	SAMN05601280	Apis_mellifera	RNA-Seq	cDNA	TRANSCRIPTOMIC					NA	NA
SRR4045774		2252148200	1358	SINGLE	SAMN05601279	Apis_mellifera	RNA-Seq	cDNA	TRANSCRIPTOMIC					NA	NA
SRR4045775		2150148100	1294	SINGLE	SAMN05601278	Apis_mellifera	RNA-Seq	cDNA	TRANSCRIPTOMIC					NA	NA
SRR4045776		3129111900	1898	SINGLE	SAMN05601277	Apis_mellifera	RNA-Seq	cDNA	TRANSCRIPTOMIC					NA	NA
SRR4045777		3260657800	2032	SINGLE	SAMN05601276	Apis_mellifera	RNA-Seq	cDNA	TRANSCRIPTOMIC					NA	NA
SRR4045778		2915518400	1733	SINGLE	SAMN05601275	Apis_mellifera	RNA-Seq	cDNA	TRANSCRIPTOMIC					NA	NA
SRR4045779		3109294000	1896	SINGLE	SAMN05601274	Apis_mellifera	RNA-Seq	cDNA	TRANSCRIPTOMIC					NA	NA
SRR4045780		3058142600	1860	SINGLE	SAMN05601273	Apis_mellifera	RNA-Seq	cDNA	TRANSCRIPTOMIC					NA	NA
SRR4045781		2858426700	1746	SINGLE	SAMN05601272	Apis_mellifera	RNA-Seq	cDNA	TRANSCRIPTOMIC					NA	NA
SRR4045782		2795448100	1705	SINGLE	SAMN05601271	Apis_mellifera	RNA-Seq	cDNA	TRANSCRIPTOMIC					NA	NA
SRR4045783		3141202000	1915	SINGLE	SAMN05601270	Apis_mellifera	RNA-Seq	cDNA	TRANSCRIPTOMIC					NA	NA
SRR4045784		3950929700	2404	SINGLE	SAMN05601269	Apis_mellifera	RNA-Seq	cDNA	TRANSCRIPTOMIC					NA	NA
SRR4045785		4482227200	2717	SINGLE	SAMN05601268	Apis_mellifera	RNA-Seq	cDNA	TRANSCRIPTOMIC					NA	NA
SRR4045786		3917081900	2381	SINGLE	SAMN05601267	Apis_mellifera	RNA-Seq	cDNA	TRANSCRIPTOMIC					NA	NA
SRR4045787		2849982100	1663	SINGLE	SAMN05601266	Apis_mellifera	RNA-Seq	cDNA	TRANSCRIPTOMIC					NA	NA
SRR4045788		2744002500	1608	SINGLE	SAMN05601316	Apis_mellifera	RNA-Seq	cDNA	TRANSCRIPTOMIC					NA	NA
SRR4045789		2924274200	1705	SINGLE	SAMN05601315	Apis_mellifera	RNA-Seq	cDNA	TRANSCRIPTOMIC					NA	NA
SRR4045790		2627006400	1541	SINGLE	SAMN05601311	Apis_mellifera	RNA-Seq	cDNA	TRANSCRIPTOMIC					NA	NA
SRR4045791		2622716200	1552	SINGLE	SAMN05601310	Apis_mellifera	RNA-Seq	cDNA	TRANSCRIPTOMIC					NA	NA
SRR4045792		2741054500	1673	SINGLE	SAMN05601309	Apis_mellifera	RNA-Seq	cDNA	TRANSCRIPTOMIC					NA	NA
SRR4045793		2591032500	1550	SINGLE	SAMN05601308	Apis_mellifera	RNA-Seq	cDNA	TRANSCRIPTOMIC					NA	NA
SRR4045794		2538900500	1522	SINGLE	SAMN05601314	Apis_mellifera	RNA-Seq	cDNA	TRANSCRIPTOMIC					NA	NA
SRR4045795		2608277900	1549	SINGLE	SAMN05601313	Apis_mellifera	RNA-Seq	cDNA	TRANSCRIPTOMIC					NA	NA
SRR4045796		2305785700	1376	SINGLE	SAMN05601312	Apis_mellifera	RNA-Seq	cDNA	TRANSCRIPTOMIC					NA	NA
SRR4045797		2256444600	1348	SINGLE	SAMN05601307	Apis_mellifera	RNA-Seq	cDNA	TRANSCRIPTOMIC					NA	NA
SRR4045798		2331436600	1365	SINGLE	SAMN05601306	Apis_mellifera	RNA-Seq	cDNA	TRANSCRIPTOMIC					NA	NA
SRR4045799		2217739000	1316	SINGLE	SAMN05601305	Apis_mellifera	RNA-Seq	cDNA	TRANSCRIPTOMIC					NA	NA
SRR4045800		2337388000	1433	SINGLE	SAMN05601304	Apis_mellifera	RNA-Seq	cDNA	TRANSCRIPTOMIC					NA	NA
SRR4045801		2290236600	1377	SINGLE	SAMN05601303	Apis_mellifera	RNA-Seq	cDNA	TRANSCRIPTOMIC					NA	NA
SRR4045802		2258514600	1334	SINGLE	SAMN05601302	Apis_mellifera	RNA-Seq	cDNA	TRANSCRIPTOMIC					NA	NA
SRR4045803		2287149300	1356	SINGLE	SAMN05601301	Apis_mellifera	RNA-Seq	cDNA	TRANSCRIPTOMIC					NA	NA
SRR4045804		2297127400	1363	SINGLE	SAMN05601300	Apis_mellifera	RNA-Seq	cDNA	TRANSCRIPTOMIC					NA	NA
SRR4045805		2203411400	1308	SINGLE	SAMN05601299	Apis_mellifera	RNA-Seq	cDNA	TRANSCRIPTOMIC					NA	NA
SRR4045806		2139210400	1283	SINGLE	SAMN05601298	Apis_mellifera	RNA-Seq	cDNA	TRANSCRIPTOMIC					NA	NA
SRR4045807		2401207000	1428	SINGLE	SAMN05601297	Apis_mellifera	RNA-Seq	cDNA	TRANSCRIPTOMIC					NA	NA
SRR4045808		2189916700	1271	SINGLE	SAMN05601296	Apis_mellifera	RNA-Seq	cDNA	TRANSCRIPTOMIC					NA	NA
SRR4045809		2230294300	1286	SINGLE	SAMN05601295	Apis_mellifera	RNA-Seq	cDNA	TRANSCRIPTOMIC					NA	NA
SRR4045810		2819407200	1735	SINGLE	SAMN05601294	Apis_mellifera	RNA-Seq	cDNA	TRANSCRIPTOMIC					NA	NA
SRR4045811		2679583900	1615	SINGLE	SAMN05601293	Apis_mellifera	RNA-Seq	cDNA	TRANSCRIPTOMIC					NA	NA
SRR4045812		2681313300	1624	SINGLE	SAMN05601292	Apis_mellifera	RNA-Seq	cDNA	TRANSCRIPTOMIC					NA	NA
SRR4045813		3005774600	1820	SINGLE	SAMN05601291	Apis_mellifera	RNA-Seq	cDNA	TRANSCRIPTOMIC					NA	NA
SRR4045814		3079326700	1865	SINGLE	SAMN05601290	Apis_mellifera	RNA-Seq	cDNA	TRANSCRIPTOMIC					NA	NA
SRR4045815		3412916800	2120	SINGLE	SAMN05601289	Apis_mellifera	RNA-Seq	cDNA	TRANSCRIPTOMIC					NA	NA
SRR4045696		4271805800	2601	SINGLE	SAMN05601245	Apis_mellifera	RNA-Seq	cDNA	TRANSCRIPTOMIC					NA	NA
SRR4045697		2603330900	1514	SINGLE	SAMN05601244	Apis_mellifera	RNA-Seq	cDNA	TRANSCRIPTOMIC					NA	NA
SRR4045698		3145832800	1834	SINGLE	SAMN05601243	Apis_mellifera	RNA-Seq	cDNA	TRANSCRIPTOMIC					NA	NA
SRR4045699		3008033300	1751	SINGLE	SAMN05601242	Apis_mellifera	RNA-Seq	cDNA	TRANSCRIPTOMIC					NA	NA
SRR4045700		2553202500	1498	SINGLE	SAMN05601241	Apis_mellifera	RNA-Seq	cDNA	TRANSCRIPTOMIC					NA	NA
SRR4045701		2242540500	1326	SINGLE	SAMN05601240	Apis_mellifera	RNA-Seq	cDNA	TRANSCRIPTOMIC					NA	NA
SRR4045702		2377358400	1442	SINGLE	SAMN05601239	Apis_mellifera	RNA-Seq	cDNA	TRANSCRIPTOMIC					NA	NA
SRR4045703		2304378200	1382	SINGLE	SAMN05601238	Apis_mellifera	RNA-Seq	cDNA	TRANSCRIPTOMIC					NA	NA
SRR4045704		2451370600	1472	SINGLE	SAMN05601237	Apis_mellifera	RNA-Seq	cDNA	TRANSCRIPTOMIC					NA	NA
SRR4045705		2507913500	1494	SINGLE	SAMN05601236	Apis_mellifera	RNA-Seq	cDNA	TRANSCRIPTOMIC					NA	NA
SRR4045706		2036145500	1225	SINGLE	SAMN05601235	Apis_mellifera	RNA-Seq	cDNA	TRANSCRIPTOMIC					NA	NA
SRR4045707		2218499100	1329	SINGLE	SAMN05601234	Apis_mellifera	RNA-Seq	cDNA	TRANSCRIPTOMIC					NA	NA
SRR4045708		2252653300	1326	SINGLE	SAMN05601233	Apis_mellifera	RNA-Seq	cDNA	TRANSCRIPTOMIC					NA	NA
SRR4045709		2392879600	1426	SINGLE	SAMN05601232	Apis_mellifera	RNA-Seq	cDNA	TRANSCRIPTOMIC					NA	NA
SRR4045710		2172325400	1332	SINGLE	SAMN05601231	Apis_mellifera	RNA-Seq	cDNA	TRANSCRIPTOMIC					NA	NA
SRR4045711		2157232800	1299	SINGLE	SAMN05601230	Apis_mellifera	RNA-Seq	cDNA	TRANSCRIPTOMIC					NA	NA
SRR4045712		2092175100	1238	SINGLE	SAMN05601229	Apis_mellifera	RNA-Seq	cDNA	TRANSCRIPTOMIC					NA	NA
SRR4045713		2624419200	1554	SINGLE	SAMN05601228	Apis_mellifera	RNA-Seq	cDNA	TRANSCRIPTOMIC					NA	NA
SRR4045714		2253965200	1339	SINGLE	SAMN05601227	Apis_mellifera	RNA-Seq	cDNA	TRANSCRIPTOMIC					NA	NA
SRR4045715		2305781000	1367	SINGLE	SAMN05601226	Apis_mellifera	RNA-Seq	cDNA	TRANSCRIPTOMIC					NA	NA
SRR4045716		2364736500	1400	SINGLE	SAMN05601225	Apis_mellifera	RNA-Seq	cDNA	TRANSCRIPTOMIC					NA	NA
SRR4045717		2378224900	1412	SINGLE	SAMN05601224	Apis_mellifera	RNA-Seq	cDNA	TRANSCRIPTOMIC					NA	NA
SRR4045718		2556774800	1483	SINGLE	SAMN05601223	Apis_mellifera	RNA-Seq	cDNA	TRANSCRIPTOMIC					NA	NA
SRR4045719		2233552500	1292	SINGLE	SAMN05601222	Apis_mellifera	RNA-Seq	cDNA	TRANSCRIPTOMIC					NA	NA
SRR4045720		3364565500	2064	SINGLE	SAMN05601221	Apis_mellifera	RNA-Seq	cDNA	TRANSCRIPTOMIC					NA	NA
SRR4045721		2858124900	1718	SINGLE	SAMN05601220	Apis_mellifera	RNA-Seq	cDNA	TRANSCRIPTOMIC					NA	NA
SRR4045722		2998720400	1811	SINGLE	SAMN05601219	Apis_mellifera	RNA-Seq	cDNA	TRANSCRIPTOMIC					NA	NA
SRR4045723		3370936300	2038	SINGLE	SAMN05601218	Apis_mellifera	RNA-Seq	cDNA	TRANSCRIPTOMIC					NA	NA
SRR4045724		2852439400	1729	SINGLE	SAMN05601217	Apis_mellifera	RNA-Seq	cDNA	TRANSCRIPTOMIC					NA	NA
SRR4045725		3458340700	2151	SINGLE	SAMN05601216	Apis_mellifera	RNA-Seq	cDNA	TRANSCRIPTOMIC					NA	NA
SRR4045726		2473896800	1469	SINGLE	SAMN05601215	Apis_mellifera	RNA-Seq	cDNA	TRANSCRIPTOMIC					NA	NA
SRR4045727		3345030100	2045	SINGLE	SAMN05601214	Apis_mellifera	RNA-Seq	cDNA	TRANSCRIPTOMIC					NA	NA
SRR4045728		3608093200	2218	SINGLE	SAMN05601213	Apis_mellifera	RNA-Seq	cDNA	TRANSCRIPTOMIC					NA	NA
SRR4045729		2895335300	1741	SINGLE	SAMN05601212	Apis_mellifera	RNA-Seq	cDNA	TRANSCRIPTOMIC					NA	NA
SRR4045730		2187841400	1309	SINGLE	SAMN05601211	Apis_mellifera	RNA-Seq	cDNA	TRANSCRIPTOMIC					NA	NA
SRR4045731		2032952700	1212	SINGLE	SAMN05601210	Apis_mellifera	RNA-Seq	cDNA	TRANSCRIPTOMIC					NA	NA
SRR4045732		2196387100	1311	SINGLE	SAMN05601209	Apis_mellifera	RNA-Seq	cDNA	TRANSCRIPTOMIC					NA	NA
SRR4045733		2162816500	1290	SINGLE	SAMN05601265	Apis_mellifera	RNA-Seq	cDNA	TRANSCRIPTOMIC					NA	NA
SRR4045734		2556673500	1501	SINGLE	SAMN05601264	Apis_mellifera	RNA-Seq	cDNA	TRANSCRIPTOMIC					NA	NA
SRR4045735		2310923300	1375	SINGLE	SAMN05601263	Apis_mellifera	RNA-Seq	cDNA	TRANSCRIPTOMIC					NA	NA
SRR4045736		2872827600	1758	SINGLE	SAMN05601262	Apis_mellifera	RNA-Seq	cDNA	TRANSCRIPTOMIC					NA	NA
SRR4045737		2244839400	1350	SINGLE	SAMN05601362	Apis_mellifera	RNA-Seq	cDNA	TRANSCRIPTOMIC					NA	NA
SRR4045738		2669656200	1594	SINGLE	SAMN05601357	Apis_mellifera	RNA-Seq	cDNA	TRANSCRIPTOMIC					NA	NA
SRR4045739		2409215900	1429	SINGLE	SAMN05601356	Apis_mellifera	RNA-Seq	cDNA	TRANSCRIPTOMIC					NA	NA
SRR4045740		2177166800	1283	SINGLE	SAMN05601361	Apis_mellifera	RNA-Seq	cDNA	TRANSCRIPTOMIC					NA	NA
SRR4045741		2030815700	1198	SINGLE	SAMN05601360	Apis_mellifera	RNA-Seq	cDNA	TRANSCRIPTOMIC					NA	NA
SRR4045742		2247194400	1330	SINGLE	SAMN05601359	Apis_mellifera	RNA-Seq	cDNA	TRANSCRIPTOMIC					NA	NA
SRR4045743		2251027300	1330	SINGLE	SAMN05601358	Apis_mellifera	RNA-Seq	cDNA	TRANSCRIPTOMIC					NA	NA
SRR4045744		2324173600	1375	SINGLE	SAMN05601355	Apis_mellifera	RNA-Seq	cDNA	TRANSCRIPTOMIC					NA	NA
SRR4045745		2032868800	1191	SINGLE	SAMN05601354	Apis_mellifera	RNA-Seq	cDNA	TRANSCRIPTOMIC					NA	NA
SRR4045746		2150195600	1233	SINGLE	SAMN05601353	Apis_mellifera	RNA-Seq	cDNA	TRANSCRIPTOMIC					NA	NA
SRR4045747		2005279800	1156	SINGLE	SAMN05601352	Apis_mellifera	RNA-Seq	cDNA	TRANSCRIPTOMIC					NA	NA
SRR4045748		2945068700	1778	SINGLE	SAMN05601351	Apis_mellifera	RNA-Seq	cDNA	TRANSCRIPTOMIC					NA	NA
SRR4045749		3324967600	2071	SINGLE	SAMN05601350	Apis_mellifera	RNA-Seq	cDNA	TRANSCRIPTOMIC					NA	NA
SRR4045750		2827611100	1706	SINGLE	SAMN05601349	Apis_mellifera	RNA-Seq	cDNA	TRANSCRIPTOMIC					NA	NA
SRR4045751		2651837700	1600	SINGLE	SAMN05601348	Apis_mellifera	RNA-Seq	cDNA	TRANSCRIPTOMIC					NA	NA
SRR4045752		2677354900	1629	SINGLE	SAMN05601347	Apis_mellifera	RNA-Seq	cDNA	TRANSCRIPTOMIC					NA	NA
SRR4045753		2703652400	1685	SINGLE	SAMN05601346	Apis_mellifera	RNA-Seq	cDNA	TRANSCRIPTOMIC					NA	NA
SRR4045754		2538028000	1515	SINGLE	SAMN05601345	Apis_mellifera	RNA-Seq	cDNA	TRANSCRIPTOMIC					NA	NA
SRR4045755		2733106000	1680	SINGLE	SAMN05601344	Apis_mellifera	RNA-Seq	cDNA	TRANSCRIPTOMIC					NA	NA
SRR4017758		5764243200	3465	PAIRED	SAMN05558738	Apis_mellifera	RNA-Seq	cDNA	TRANSCRIPTOMIC					mushroom body (dissected from brain)	NA
SRR4017759		5078201200	3065	PAIRED	SAMN05558736	Apis_mellifera	RNA-Seq	cDNA	TRANSCRIPTOMIC					mushroom body (dissected from brain)	NA
SRR4017760		5344213800	3223	PAIRED	SAMN05558735	Apis_mellifera	RNA-Seq	cDNA	TRANSCRIPTOMIC					mushroom body (dissected from brain)	NA
SRR4017761		6102504200	3652	PAIRED	SAMN05558734	Apis_mellifera	RNA-Seq	cDNA	TRANSCRIPTOMIC					mushroom body (dissected from brain)	NA
SRR4017762		5048593800	3025	PAIRED	SAMN05558725	Apis_mellifera	RNA-Seq	cDNA	TRANSCRIPTOMIC					mushroom body (dissected from brain)	NA
SRR4017763		5698897000	3556	PAIRED	SAMN05558733	Apis_mellifera	RNA-Seq	cDNA	TRANSCRIPTOMIC					mushroom body (dissected from brain)	NA
SRR4017764		6090422600	3646	PAIRED	SAMN05558728	Apis_mellifera	RNA-Seq	cDNA	TRANSCRIPTOMIC					mushroom body (dissected from brain)	NA
SRR4017765		5670866200	3464	PAIRED	SAMN05558732	Apis_mellifera	RNA-Seq	cDNA	TRANSCRIPTOMIC					mushroom body (dissected from brain)	NA
SRR4017766		4875535200	2856	PAIRED	SAMN05558731	Apis_mellifera	RNA-Seq	cDNA	TRANSCRIPTOMIC					mushroom body (dissected from brain)	NA
SRR4017767		3929372000	2348	PAIRED	SAMN05558730	Apis_mellifera	RNA-Seq	cDNA	TRANSCRIPTOMIC					mushroom body (dissected from brain)	NA
SRR4017768		5329916000	3187	PAIRED	SAMN05558729	Apis_mellifera	RNA-Seq	cDNA	TRANSCRIPTOMIC					mushroom body (dissected from brain)	NA
SRR4017769		10219682000	6402	PAIRED	SAMN05558727	Apis_mellifera	RNA-Seq	cDNA	TRANSCRIPTOMIC					mushroom body (dissected from brain)	NA
SRR4017770		6417815600	3935	PAIRED	SAMN05558726	Apis_mellifera	RNA-Seq	cDNA	TRANSCRIPTOMIC					mushroom body (dissected from brain)	NA
SRR4017771		7255625400	4371	PAIRED	SAMN05558724	Apis_mellifera	RNA-Seq	cDNA	TRANSCRIPTOMIC					mushroom body (dissected from brain)	NA
SRR4017772		6481955800	3893	PAIRED	SAMN05558723	Apis_mellifera	RNA-Seq	cDNA	TRANSCRIPTOMIC					mushroom body (dissected from brain)	NA
SRR4017773		5384337600	3233	PAIRED	SAMN05558722	Apis_mellifera	RNA-Seq	cDNA	TRANSCRIPTOMIC					mushroom body (dissected from brain)	NA
SRR4017774		8545905200	5117	PAIRED	SAMN05558721	Apis_mellifera	RNA-Seq	cDNA	TRANSCRIPTOMIC					mushroom body (dissected from brain)	NA
SRR4017775		6343319600	3813	PAIRED	SAMN05558720	Apis_mellifera	RNA-Seq	cDNA	TRANSCRIPTOMIC					mushroom body (dissected from brain)	NA
SRR4017776		4801055800	2892	PAIRED	SAMN05558767	Apis_mellifera	RNA-Seq	cDNA	TRANSCRIPTOMIC					mushroom body (dissected from brain)	NA
SRR4017777		4069618000	2467	PAIRED	SAMN05558766	Apis_mellifera	RNA-Seq	cDNA	TRANSCRIPTOMIC					mushroom body (dissected from brain)	NA
SRR4017778		3806720000	2316	PAIRED	SAMN05558765	Apis_mellifera	RNA-Seq	cDNA	TRANSCRIPTOMIC					mushroom body (dissected from brain)	NA
SRR4017779		8005334600	5051	PAIRED	SAMN05558764	Apis_mellifera	RNA-Seq	cDNA	TRANSCRIPTOMIC					mushroom body (dissected from brain)	NA
SRR4017780		7132045000	4309	PAIRED	SAMN05558763	Apis_mellifera	RNA-Seq	cDNA	TRANSCRIPTOMIC					mushroom body (dissected from brain)	NA
SRR4017781		8349536200	5152	PAIRED	SAMN05558762	Apis_mellifera	RNA-Seq	cDNA	TRANSCRIPTOMIC					mushroom body (dissected from brain)	NA
SRR4017782		4910970600	2976	PAIRED	SAMN05558761	Apis_mellifera	RNA-Seq	cDNA	TRANSCRIPTOMIC					mushroom body (dissected from brain)	NA
SRR4017783		3062013000	1855	PAIRED	SAMN05558760	Apis_mellifera	RNA-Seq	cDNA	TRANSCRIPTOMIC					mushroom body (dissected from brain)	NA
SRR4017784		7921186800	4777	PAIRED	SAMN05558759	Apis_mellifera	RNA-Seq	cDNA	TRANSCRIPTOMIC					mushroom body (dissected from brain)	NA
SRR4017785		5539403600	3339	PAIRED	SAMN05558758	Apis_mellifera	RNA-Seq	cDNA	TRANSCRIPTOMIC					mushroom body (dissected from brain)	NA
SRR4017786		5071745800	3177	PAIRED	SAMN05558757	Apis_mellifera	RNA-Seq	cDNA	TRANSCRIPTOMIC					mushroom body (dissected from brain)	NA
SRR4017787		4412117800	2665	PAIRED	SAMN05558756	Apis_mellifera	RNA-Seq	cDNA	TRANSCRIPTOMIC					mushroom body (dissected from brain)	NA
SRR4017788		5857632600	3534	PAIRED	SAMN05558755	Apis_mellifera	RNA-Seq	cDNA	TRANSCRIPTOMIC					mushroom body (dissected from brain)	NA
SRR4017789		3372607800	2082	PAIRED	SAMN05558754	Apis_mellifera	RNA-Seq	cDNA	TRANSCRIPTOMIC					mushroom body (dissected from brain)	NA
SRR4017790		4784678000	2899	PAIRED	SAMN05558753	Apis_mellifera	RNA-Seq	cDNA	TRANSCRIPTOMIC					mushroom body (dissected from brain)	NA
SRR4017791		5061002800	3063	PAIRED	SAMN05558752	Apis_mellifera	RNA-Seq	cDNA	TRANSCRIPTOMIC					mushroom body (dissected from brain)	NA
SRR4017792		8034648000	5058	PAIRED	SAMN05558751	Apis_mellifera	RNA-Seq	cDNA	TRANSCRIPTOMIC					mushroom body (dissected from brain)	NA
SRR4017793		4421508400	2696	PAIRED	SAMN05558750	Apis_mellifera	RNA-Seq	cDNA	TRANSCRIPTOMIC					mushroom body (dissected from brain)	NA
SRR4017794		3748330200	2312	PAIRED	SAMN05558749	Apis_mellifera	RNA-Seq	cDNA	TRANSCRIPTOMIC					mushroom body (dissected from brain)	NA
SRR4017795		2454671400	1490	PAIRED	SAMN05558748	Apis_mellifera	RNA-Seq	cDNA	TRANSCRIPTOMIC					mushroom body (dissected from brain)	NA
SRR4017796		4224729800	2648	PAIRED	SAMN05558747	Apis_mellifera	RNA-Seq	cDNA	TRANSCRIPTOMIC					mushroom body (dissected from brain)	NA
SRR4017797		5888605000	3572	PAIRED	SAMN05558746	Apis_mellifera	RNA-Seq	cDNA	TRANSCRIPTOMIC					mushroom body (dissected from brain)	NA
SRR4017798		5591000000	3376	PAIRED	SAMN05558745	Apis_mellifera	RNA-Seq	cDNA	TRANSCRIPTOMIC					mushroom body (dissected from brain)	NA
SRR4045680		2385106800	1426	SINGLE	SAMN05601261	Apis_mellifera	RNA-Seq	cDNA	TRANSCRIPTOMIC					NA	NA
SRR4045681		2420087100	1482	SINGLE	SAMN05601260	Apis_mellifera	RNA-Seq	cDNA	TRANSCRIPTOMIC					NA	NA
SRR4045682		2897471500	1781	SINGLE	SAMN05601259	Apis_mellifera	RNA-Seq	cDNA	TRANSCRIPTOMIC					NA	NA
SRR4045683		2656339100	1600	SINGLE	SAMN05601258	Apis_mellifera	RNA-Seq	cDNA	TRANSCRIPTOMIC					NA	NA
SRR4045684		2781617400	1681	SINGLE	SAMN05601257	Apis_mellifera	RNA-Seq	cDNA	TRANSCRIPTOMIC					NA	NA
SRR4045685		2731701200	1650	SINGLE	SAMN05601256	Apis_mellifera	RNA-Seq	cDNA	TRANSCRIPTOMIC					NA	NA
SRR4045686		2969602000	1800	SINGLE	SAMN05601255	Apis_mellifera	RNA-Seq	cDNA	TRANSCRIPTOMIC					NA	NA
SRR4045687		3604317200	2225	SINGLE	SAMN05601254	Apis_mellifera	RNA-Seq	cDNA	TRANSCRIPTOMIC					NA	NA
SRR4045688		2997938800	1771	SINGLE	SAMN05601253	Apis_mellifera	RNA-Seq	cDNA	TRANSCRIPTOMIC					NA	NA
SRR4045689		3240478600	1974	SINGLE	SAMN05601252	Apis_mellifera	RNA-Seq	cDNA	TRANSCRIPTOMIC					NA	NA
SRR4045690		3237409200	1979	SINGLE	SAMN05601251	Apis_mellifera	RNA-Seq	cDNA	TRANSCRIPTOMIC					NA	NA
SRR4045691		2869243100	1752	SINGLE	SAMN05601250	Apis_mellifera	RNA-Seq	cDNA	TRANSCRIPTOMIC					NA	NA
SRR4045692		3079776300	1884	SINGLE	SAMN05601249	Apis_mellifera	RNA-Seq	cDNA	TRANSCRIPTOMIC					NA	NA
SRR4045693		2930877100	1795	SINGLE	SAMN05601248	Apis_mellifera	RNA-Seq	cDNA	TRANSCRIPTOMIC					NA	NA
SRR4045694		3356023700	2043	SINGLE	SAMN05601247	Apis_mellifera	RNA-Seq	cDNA	TRANSCRIPTOMIC					NA	NA
SRR4045695		3816658200	2310	SINGLE	SAMN05601246	Apis_mellifera	RNA-Seq	cDNA	TRANSCRIPTOMIC					NA	NA
SRR4017751		5118141600	3073	PAIRED	SAMN05558744	Apis_mellifera	RNA-Seq	cDNA	TRANSCRIPTOMIC					mushroom body (dissected from brain)	NA
SRR4017752		4940862200	2983	PAIRED	SAMN05558743	Apis_mellifera	RNA-Seq	cDNA	TRANSCRIPTOMIC					mushroom body (dissected from brain)	NA
SRR4017753		4243784600	2659	PAIRED	SAMN05558742	Apis_mellifera	RNA-Seq	cDNA	TRANSCRIPTOMIC					mushroom body (dissected from brain)	NA
SRR4017754		5125910000	3193	PAIRED	SAMN05558741	Apis_mellifera	RNA-Seq	cDNA	TRANSCRIPTOMIC					mushroom body (dissected from brain)	NA
SRR4017755		4587960400	2758	PAIRED	SAMN05558740	Apis_mellifera	RNA-Seq	cDNA	TRANSCRIPTOMIC					mushroom body (dissected from brain)	NA
SRR4017756		6556050600	3881	PAIRED	SAMN05558739	Apis_mellifera	RNA-Seq	cDNA	TRANSCRIPTOMIC					mushroom body (dissected from brain)	NA
SRR4017757		6308234000	3869	PAIRED	SAMN05558737	Apis_mellifera	RNA-Seq	cDNA	TRANSCRIPTOMIC					mushroom body (dissected from brain)	NA
SRR4002869		1437910740	945	PAIRED	SAMN05508585	Apis_mellifera	RNA-Seq	RANDOM	TRANSCRIPTOMIC	female				abdomen	forager
SRR4002870		1832833440	1199	PAIRED	SAMN05508586	Apis_mellifera	RNA-Seq	RANDOM	TRANSCRIPTOMIC	female				head	forager
SRR4002871		1790522460	1167	PAIRED	SAMN05508587	Apis_mellifera	RNA-Seq	RANDOM	TRANSCRIPTOMIC	female				abdomen	forager
SRR4002872		1654782120	1083	PAIRED	SAMN05508588	Apis_mellifera	RNA-Seq	RANDOM	TRANSCRIPTOMIC	female				head	forager
SRR4002873		1446324300	951	PAIRED	SAMN05508589	Apis_mellifera	RNA-Seq	RANDOM	TRANSCRIPTOMIC	female				abdomen	forager
SRR4002874		1409647320	924	PAIRED	SAMN05508590	Apis_mellifera	RNA-Seq	RANDOM	TRANSCRIPTOMIC	female				head	forager
SRR4002875		1567267740	1026	PAIRED	SAMN05508591	Apis_mellifera	RNA-Seq	RANDOM	TRANSCRIPTOMIC	female				abdomen	forager
SRR4002876		1517721120	995	PAIRED	SAMN05508592	Apis_mellifera	RNA-Seq	RANDOM	TRANSCRIPTOMIC	female				head	forager
SRR4002877		1730013660	1131	PAIRED	SAMN05508593	Apis_mellifera	RNA-Seq	RANDOM	TRANSCRIPTOMIC	female				abdomen	forager
SRR4002878		1621473480	1061	PAIRED	SAMN05508594	Apis_mellifera	RNA-Seq	RANDOM	TRANSCRIPTOMIC	female				head	forager
SRR4002879		1692104940	1113	PAIRED	SAMN05508595	Apis_mellifera	WGS	RANDOM	TRANSCRIPTOMIC	female				abdomen	forager
SRR4002880		1754374320	1147	PAIRED	SAMN05508596	Apis_mellifera	RNA-Seq	RANDOM	TRANSCRIPTOMIC	female				head	forager
SRR4002881		1299926700	861	PAIRED	SAMN05508597	Apis_mellifera	RNA-Seq	RANDOM	TRANSCRIPTOMIC	female				abdomen	forager
SRR4002882		1572783660	1031	PAIRED	SAMN05508598	Apis_mellifera	RNA-Seq	RANDOM	TRANSCRIPTOMIC	female				head	forager
SRR4002883		1430772300	942	PAIRED	SAMN05508599	Apis_mellifera	RNA-Seq	RANDOM	TRANSCRIPTOMIC	female				abdomen	forager
SRR4002884		1665877140	1093	PAIRED	SAMN05508600	Apis_mellifera	RNA-Seq	RANDOM	TRANSCRIPTOMIC	female				head	forager
SRR4002885		1488951000	979	PAIRED	SAMN05508601	Apis_mellifera	RNA-Seq	RANDOM	TRANSCRIPTOMIC	female				abdomen	forager
SRR4002886		1436686740	940	PAIRED	SAMN05508602	Apis_mellifera	RNA-Seq	RANDOM	TRANSCRIPTOMIC	female				head	forager
SRR4002888		1720287720	1133	PAIRED	SAMN05508603	Apis_mellifera	RNA-Seq	RANDOM	TRANSCRIPTOMIC	female				abdomen	forager
SRR4002889		1611810180	1055	PAIRED	SAMN05508604	Apis_mellifera	RNA-Seq	RANDOM	TRANSCRIPTOMIC	female				head	forager
SRR4002890		2170956420	1390	PAIRED	SAMN05508605	Apis_mellifera	RNA-Seq	RANDOM	TRANSCRIPTOMIC	female				abdomen	forager
SRR4002891		1826427420	1168	PAIRED	SAMN05508606	Apis_mellifera	RNA-Seq	RANDOM	TRANSCRIPTOMIC	female				head	forager
SRR4002892		2234476260	1428	PAIRED	SAMN05508607	Apis_mellifera	RNA-Seq	RANDOM	TRANSCRIPTOMIC	female				abdomen	forager
SRR4002893		1639862640	1054	PAIRED	SAMN05508608	Apis_mellifera	RNA-Seq	RANDOM	TRANSCRIPTOMIC	female				head	forager
SRR4002894		1601849880	1020	PAIRED	SAMN05508609	Apis_mellifera	RNA-Seq	RANDOM	TRANSCRIPTOMIC	female				abdomen	forager
SRR4002895		1896905160	1213	PAIRED	SAMN05508610	Apis_mellifera	RNA-Seq	RANDOM	TRANSCRIPTOMIC	female				head	forager
SRR4002896		2090416320	1334	PAIRED	SAMN05508611	Apis_mellifera	RNA-Seq	RANDOM	TRANSCRIPTOMIC	female				abdomen	forager
SRR4002897		1571739120	1004	PAIRED	SAMN05508612	Apis_mellifera	RNA-Seq	RANDOM	TRANSCRIPTOMIC	female				head	forager
SRR4002898		1236100860	785	PAIRED	SAMN05508613	Apis_mellifera	RNA-Seq	RANDOM	TRANSCRIPTOMIC	female				abdomen	forager
SRR4002899		1522542960	970	PAIRED	SAMN05508614	Apis_mellifera	RNA-Seq	RANDOM	TRANSCRIPTOMIC	female				head	forager
SRR3714103		759254450	470	SINGLE	SAMN02954475	Apis_mellifera	RNA-Seq	PolyA	TRANSCRIPTOMIC	female				embryo	NA
SRR3714104		838049350	519	SINGLE	SAMN02954475	Apis_mellifera	RNA-Seq	PolyA	TRANSCRIPTOMIC	female				embryo	NA
SRR3675069		5687476600	3540	SINGLE	SAMN05255849	Apis_mellifera	RNA-Seq	cDNA	TRANSCRIPTOMIC					NA	NA
SRR3675070		5255745300	3263	SINGLE	SAMN05255850	Apis_mellifera	RNA-Seq	cDNA	TRANSCRIPTOMIC					NA	NA
SRR3675071		5998550000	3722	SINGLE	SAMN05255851	Apis_mellifera	RNA-Seq	cDNA	TRANSCRIPTOMIC					NA	NA
SRR3675072		5710852000	3549	SINGLE	SAMN05255852	Apis_mellifera	RNA-Seq	cDNA	TRANSCRIPTOMIC					NA	NA
SRR3675073		5439369600	3381	SINGLE	SAMN05255853	Apis_mellifera	RNA-Seq	cDNA	TRANSCRIPTOMIC					NA	NA
SRR3675074		6261773700	3906	SINGLE	SAMN05255854	Apis_mellifera	RNA-Seq	cDNA	TRANSCRIPTOMIC					NA	NA
SRR3675075		6452362900	4027	SINGLE	SAMN05255855	Apis_mellifera	RNA-Seq	cDNA	TRANSCRIPTOMIC					NA	NA
SRR3675076		6132908800	3839	SINGLE	SAMN05255856	Apis_mellifera	RNA-Seq	cDNA	TRANSCRIPTOMIC					NA	NA
SRR3675077		5867976200	3672	SINGLE	SAMN05255857	Apis_mellifera	RNA-Seq	cDNA	TRANSCRIPTOMIC					NA	NA
SRR3708802		138348684	96	SINGLE	SAMN02978959	Apis_mellifera	RNA-Seq	size fractionation	TRANSCRIPTOMIC	female				embryos	NA
SRR3708803		1391745708	815	SINGLE	SAMN02978959	Apis_mellifera	RNA-Seq	size fractionation	TRANSCRIPTOMIC	female				embryos	NA
SRR3708804		1455129648	839	SINGLE	SAMN02978959	Apis_mellifera	RNA-Seq	size fractionation	TRANSCRIPTOMIC	female				embryos	NA
SRR3569809		5370924400	3525	PAIRED	SAMN05162530	Apis_mellifera	RNA-Seq	PCR	TRANSCRIPTOMIC	pooled male and female				tissue	NA
SRR3569811		7673842600	5032	PAIRED	SAMN05162530	Apis_mellifera	RNA-Seq	PCR	TRANSCRIPTOMIC	pooled male and female				tissue	NA
SRR3569812		7563111200	4950	PAIRED	SAMN05162530	Apis_mellifera	RNA-Seq	PCR	TRANSCRIPTOMIC	pooled male and female				tissue	NA
SRR3569813		6573863200	4299	PAIRED	SAMN05162530	Apis_mellifera	RNA-Seq	PCR	TRANSCRIPTOMIC	pooled male and female				tissue	NA
SRR3547488		4095140950	2719	SINGLE	SAMN05150055	Apis_mellifera	RNA-Seq	cDNA	TRANSCRIPTOMIC					brain (pool of 4 brains)	NA
SRR3547489		4777824650	3157	SINGLE	SAMN05150056	Apis_mellifera	RNA-Seq	cDNA	TRANSCRIPTOMIC					brain (pool of 4 brains)	NA
SRR3547490		3677005350	2488	SINGLE	SAMN05150057	Apis_mellifera	RNA-Seq	cDNA	TRANSCRIPTOMIC					brain (pool of 4 brains)	NA
SRR3547491		4441539100	2969	SINGLE	SAMN05150059	Apis_mellifera	RNA-Seq	cDNA	TRANSCRIPTOMIC					brain (pool of 4 brains)	NA
SRR3547492		4970600500	3307	SINGLE	SAMN05150060	Apis_mellifera	RNA-Seq	cDNA	TRANSCRIPTOMIC					brain (pool of 4 brains)	NA
SRR3547493		2845903250	1959	SINGLE	SAMN05150061	Apis_mellifera	RNA-Seq	cDNA	TRANSCRIPTOMIC					brain (pool of 4 brains)	NA
SRR3547494		3614159900	2465	SINGLE	SAMN05150062	Apis_mellifera	RNA-Seq	cDNA	TRANSCRIPTOMIC					brain (pool of 4 brains)	NA
SRR3547484		4504956850	2980	SINGLE	SAMN05150051	Apis_mellifera	RNA-Seq	cDNA	TRANSCRIPTOMIC					brain (pool of 4 brains)	NA
SRR3547485		2262623700	1564	SINGLE	SAMN05150052	Apis_mellifera	RNA-Seq	cDNA	TRANSCRIPTOMIC					brain (pool of 4 brains)	NA
SRR3547486		4577702050	3082	SINGLE	SAMN05150053	Apis_mellifera	RNA-Seq	cDNA	TRANSCRIPTOMIC					brain (pool of 4 brains)	NA
SRR3547487		3998512600	2662	SINGLE	SAMN05150054	Apis_mellifera	RNA-Seq	cDNA	TRANSCRIPTOMIC					brain (pool of 4 brains)	NA
SRR5041701		319183950	186	PAIRED	SAMN04516663	Apis_mellifera	RNA-Seq	PolyA	TRANSCRIPTOMIC	female				brain	L3
SRR3123400		3315859265	1968	PAIRED	SAMN04413734	Apis_mellifera	RNA-Seq	PolyA	TRANSCRIPTOMIC					larvae body	NA
SRR3123402		3665609547	2177	PAIRED	SAMN04413734	Apis_mellifera	RNA-Seq	PolyA	TRANSCRIPTOMIC					larvae body	NA
SRR3123404		3458122132	2064	PAIRED	SAMN04413734	Apis_mellifera	RNA-Seq	PolyA	TRANSCRIPTOMIC					larvae body	NA
SRR3123406		3835111740	2291	PAIRED	SAMN04413734	Apis_mellifera	RNA-Seq	PolyA	TRANSCRIPTOMIC					larvae body	NA
SRR3123407		4052238913	2424	PAIRED	SAMN04413734	Apis_mellifera	RNA-Seq	PolyA	TRANSCRIPTOMIC					larvae body	NA
SRR3123408		3369486989	2003	PAIRED	SAMN04413734	Apis_mellifera	RNA-Seq	PolyA	TRANSCRIPTOMIC					larvae body	NA
SRR3123355		3420889510	2038	PAIRED	SAMN04413667	Apis_mellifera	RNA-Seq	PolyA	TRANSCRIPTOMIC					larvae body	NA
SRR3123357		3269079311	1935	PAIRED	SAMN04413667	Apis_mellifera	RNA-Seq	PolyA	TRANSCRIPTOMIC					larvae body	NA
SRR3123359		2804409188	1665	PAIRED	SAMN04413667	Apis_mellifera	RNA-Seq	PolyA	TRANSCRIPTOMIC					larvae body	NA
SRR3123361		3373047566	1987	PAIRED	SAMN04413667	Apis_mellifera	RNA-Seq	PolyA	TRANSCRIPTOMIC					larvae body	NA
SRR3123362		3376516278	2011	PAIRED	SAMN04413667	Apis_mellifera	RNA-Seq	PolyA	TRANSCRIPTOMIC					larvae body	NA
SRR3123364		3681656879	2181	PAIRED	SAMN04413667	Apis_mellifera	RNA-Seq	PolyA	TRANSCRIPTOMIC					larvae body	NA
SRR3102934		3421917409	2055	PAIRED	SAMN04413663	Apis_mellifera	RNA-Seq	PolyA	TRANSCRIPTOMIC					larvae body	NA
SRR3123272		3435886994	2067	PAIRED	SAMN04413663	Apis_mellifera	RNA-Seq	PolyA	TRANSCRIPTOMIC					larvae body	NA
SRR3123273		3291695850	1974	PAIRED	SAMN04413663	Apis_mellifera	RNA-Seq	PolyA	TRANSCRIPTOMIC					larvae body	NA
SRR3123275		3401658632	2039	PAIRED	SAMN04413663	Apis_mellifera	RNA-Seq	PolyA	TRANSCRIPTOMIC					larvae body	NA
SRR3123276		3265167987	1966	PAIRED	SAMN04413663	Apis_mellifera	RNA-Seq	PolyA	TRANSCRIPTOMIC					larvae body	NA
SRR3123277		3156382673	1879	PAIRED	SAMN04413663	Apis_mellifera	RNA-Seq	PolyA	TRANSCRIPTOMIC					larvae body	NA
SRR3123443		3563916591	2163	PAIRED	SAMN04413735	Apis_mellifera	RNA-Seq	PolyA	TRANSCRIPTOMIC					larvae body	NA
SRR3123445		3266531869	1973	PAIRED	SAMN04413735	Apis_mellifera	RNA-Seq	PolyA	TRANSCRIPTOMIC					larvae body	NA
SRR3123446		2756717334	1662	PAIRED	SAMN04413735	Apis_mellifera	RNA-Seq	PolyA	TRANSCRIPTOMIC					larvae body	NA
SRR3123448		3355144945	2026	PAIRED	SAMN04413735	Apis_mellifera	RNA-Seq	PolyA	TRANSCRIPTOMIC					larvae body	NA
SRR3123449		3480808204	2113	PAIRED	SAMN04413735	Apis_mellifera	RNA-Seq	PolyA	TRANSCRIPTOMIC					larvae body	NA
SRR3123451		3673103779	2202	PAIRED	SAMN04413735	Apis_mellifera	RNA-Seq	PolyA	TRANSCRIPTOMIC					larvae body	NA
SRR3123372		3375828846	2070	PAIRED	SAMN04413668	Apis_mellifera	RNA-Seq	PolyA	TRANSCRIPTOMIC					larvae body	NA
SRR3123380		4067537138	2490	PAIRED	SAMN04413668	Apis_mellifera	RNA-Seq	PolyA	TRANSCRIPTOMIC					larvae body	NA
SRR3123385		3250290850	1998	PAIRED	SAMN04413668	Apis_mellifera	RNA-Seq	PolyA	TRANSCRIPTOMIC					larvae body	NA
SRR3123388		3263660733	1952	PAIRED	SAMN04413668	Apis_mellifera	RNA-Seq	PolyA	TRANSCRIPTOMIC					larvae body	NA
SRR3123389		3331631940	1997	PAIRED	SAMN04413668	Apis_mellifera	RNA-Seq	PolyA	TRANSCRIPTOMIC					larvae body	NA
SRR3123390		3556198831	2130	PAIRED	SAMN04413668	Apis_mellifera	RNA-Seq	PolyA	TRANSCRIPTOMIC					larvae body	NA
SRR3123279		3621149122	2189	PAIRED	SAMN04413664	Apis_mellifera	RNA-Seq	PolyA	TRANSCRIPTOMIC					larvae body	NA
SRR3123281		3308419230	2005	PAIRED	SAMN04413664	Apis_mellifera	RNA-Seq	PolyA	TRANSCRIPTOMIC					larvae body	NA
SRR3123337		4008211069	2420	PAIRED	SAMN04413664	Apis_mellifera	RNA-Seq	PolyA	TRANSCRIPTOMIC					larvae body	NA
SRR3123340		3256439637	1952	PAIRED	SAMN04413664	Apis_mellifera	RNA-Seq	PolyA	TRANSCRIPTOMIC					larvae body	NA
SRR3123341		3329745103	2018	PAIRED	SAMN04413664	Apis_mellifera	RNA-Seq	PolyA	TRANSCRIPTOMIC					larvae body	NA
SRR3123342		3707089435	2243	PAIRED	SAMN04413664	Apis_mellifera	RNA-Seq	PolyA	TRANSCRIPTOMIC					larvae body	NA
SRR3033252		3715467204	2333	PAIRED	SAMN04351091	Apis_mellifera	RNA-Seq	cDNA	TRANSCRIPTOMIC					Eviscerated abdomen with attached fat bodies and inactive ovaries	Adult workers &gt;18 days post emergence
SRR3033253		4497425364	2840	PAIRED	SAMN04351092	Apis_mellifera	RNA-Seq	cDNA	TRANSCRIPTOMIC					Eviscerated abdomen with attached fat bodies and inactive ovaries	Adult workers &gt;18 days post emergence
SRR3033254		3999602828	2482	PAIRED	SAMN04351093	Apis_mellifera	RNA-Seq	cDNA	TRANSCRIPTOMIC					Eviscerated abdomen with attached fat bodies and inactive ovaries	Adult workers &gt;18 days post emergence
SRR3033255		3510941598	2185	PAIRED	SAMN04351094	Apis_mellifera	RNA-Seq	cDNA	TRANSCRIPTOMIC					Eviscerated abdomen with attached fat bodies and inactive ovaries	Adult workers &gt;18 days post emergence
SRR3033256		2071881276	1290	PAIRED	SAMN04351095	Apis_mellifera	RNA-Seq	cDNA	TRANSCRIPTOMIC					Eviscerated abdomen with attached fat bodies and inactive ovaries	Adult workers &gt;18 days post emergence
SRR3033257		4053684692	2536	PAIRED	SAMN04351096	Apis_mellifera	RNA-Seq	cDNA	TRANSCRIPTOMIC					Eviscerated abdomen with attached fat bodies and inactive ovaries	Adult workers &gt;18 days post emergence
SRR3033258		3641348758	2303	PAIRED	SAMN04351097	Apis_mellifera	RNA-Seq	cDNA	TRANSCRIPTOMIC					Eviscerated abdomen with attached fat bodies and inactive ovaries	Adult workers &gt;18 days post emergence
SRR3033259		4480922974	2800	PAIRED	SAMN04351098	Apis_mellifera	RNA-Seq	cDNA	TRANSCRIPTOMIC					Eviscerated abdomen with attached fat bodies and inactive ovaries	Adult workers &gt;18 days post emergence
SRR3033260		4437573168	2742	PAIRED	SAMN04351099	Apis_mellifera	RNA-Seq	cDNA	TRANSCRIPTOMIC					Eviscerated abdomen with attached fat bodies and inactive ovaries	Adult workers &gt;18 days post emergence
SRR3033261		2830665996	1784	PAIRED	SAMN04351100	Apis_mellifera	RNA-Seq	cDNA	TRANSCRIPTOMIC					Eviscerated abdomen with attached fat bodies and inactive ovaries	Adult workers &gt;18 days post emergence
SRR3033262		4777788032	2984	PAIRED	SAMN04351101	Apis_mellifera	RNA-Seq	cDNA	TRANSCRIPTOMIC					Eviscerated abdomen with attached fat bodies and active ovaries	Adult workers &gt;18 days post emergence
SRR3033263		4536988478	2816	PAIRED	SAMN04351102	Apis_mellifera	RNA-Seq	cDNA	TRANSCRIPTOMIC					Eviscerated abdomen with attached fat bodies and active ovaries	Adult workers &gt;18 days post emergence
SRR3033264		3615744652	2256	PAIRED	SAMN04351103	Apis_mellifera	RNA-Seq	cDNA	TRANSCRIPTOMIC					Eviscerated abdomen with attached fat bodies and active ovaries	Adult workers &gt;18 days post emergence
SRR3033265		3304820798	2030	PAIRED	SAMN04351104	Apis_mellifera	RNA-Seq	cDNA	TRANSCRIPTOMIC					Eviscerated abdomen with attached fat bodies and active ovaries	Adult workers &gt;18 days post emergence
SRR3033266		3650570462	2226	PAIRED	SAMN04351105	Apis_mellifera	RNA-Seq	cDNA	TRANSCRIPTOMIC					Eviscerated abdomen with attached fat bodies and active ovaries	Adult workers &gt;18 days post emergence
SRR3033267		3974174462	2442	PAIRED	SAMN04351106	Apis_mellifera	RNA-Seq	cDNA	TRANSCRIPTOMIC					Eviscerated abdomen with attached fat bodies and active ovaries	Adult workers &gt;18 days post emergence
SRR3033268		4506745644	2784	PAIRED	SAMN04351107	Apis_mellifera	RNA-Seq	cDNA	TRANSCRIPTOMIC					Eviscerated abdomen with attached fat bodies and active ovaries	Adult workers &gt;18 days post emergence
SRR3033269		4373369892	2711	PAIRED	SAMN04351108	Apis_mellifera	RNA-Seq	cDNA	TRANSCRIPTOMIC					Eviscerated abdomen with attached fat bodies and active ovaries	Adult workers &gt;18 days post emergence
SRR3033270		3355358370	2081	PAIRED	SAMN04351109	Apis_mellifera	RNA-Seq	cDNA	TRANSCRIPTOMIC					Eviscerated abdomen with attached fat bodies and active ovaries	Adult workers &gt;18 days post emergence
SRR3033271		4147440770	2585	PAIRED	SAMN04351110	Apis_mellifera	RNA-Seq	cDNA	TRANSCRIPTOMIC					Eviscerated abdomen with attached fat bodies and active ovaries	Adult workers &gt;18 days post emergence
SRR3033272		3738944856	2307	PAIRED	SAMN04351111	Apis_mellifera	RNA-Seq	cDNA	TRANSCRIPTOMIC					Eviscerated abdomen with attached fat bodies and active ovaries	Adult workers &gt;18 days post emergence
SRR3033273		4261297666	2655	PAIRED	SAMN04351112	Apis_mellifera	RNA-Seq	cDNA	TRANSCRIPTOMIC					Eviscerated abdomen with attached fat bodies and active ovaries	Adult workers &gt;18 days post emergence
SRR3144558		4858364882	2168	PAIRED	SAMN04450256	Apis_mellifera	RNA-Seq	PolyA	TRANSCRIPTOMIC					head,chest	NA
SRR3144559		3889864944	1693	PAIRED	SAMN04450256	Apis_mellifera	RNA-Seq	PolyA	TRANSCRIPTOMIC					head,chest	NA
SRR3144549		6144926583	2533	PAIRED	SAMN04450257	Apis_mellifera	RNA-Seq	PolyA	TRANSCRIPTOMIC					head,chest	NA
SRR3144556		5531883834	2269	PAIRED	SAMN04450257	Apis_mellifera	RNA-Seq	PolyA	TRANSCRIPTOMIC					head,chest	NA
SRR3144557		4553856152	1869	PAIRED	SAMN04450257	Apis_mellifera	RNA-Seq	PolyA	TRANSCRIPTOMIC					head,chest	NA
SRR3095863		5920851578	3606	PAIRED	SAMN04390202	Apis_mellifera	RNA-Seq	PolyA	TRANSCRIPTOMIC					larvae body	NA
SRR3095864		5856376785	3579	PAIRED	SAMN04390202	Apis_mellifera	RNA-Seq	PolyA	TRANSCRIPTOMIC					larvae body	NA
SRR3095865		6265610623	3801	PAIRED	SAMN04390202	Apis_mellifera	RNA-Seq	PolyA	TRANSCRIPTOMIC					larvae body	NA
SRR3095866		5142443309	2341	PAIRED	SAMN04390202	Apis_mellifera	RNA-Seq	PolyA	TRANSCRIPTOMIC					larvae body	NA
SRR3095867		5417538852	2428	PAIRED	SAMN04390202	Apis_mellifera	RNA-Seq	PolyA	TRANSCRIPTOMIC					larvae body	NA
SRR3095868		5409980757	2415	PAIRED	SAMN04390202	Apis_mellifera	RNA-Seq	PolyA	TRANSCRIPTOMIC					larvae body	NA
SRR3095845		7248248322	3324	PAIRED	SAMN04390203	Apis_mellifera	RNA-Seq	PolyA	TRANSCRIPTOMIC					larvae body	NA
SRR3095846		8109634896	3721	PAIRED	SAMN04390203	Apis_mellifera	RNA-Seq	PolyA	TRANSCRIPTOMIC					larvae body	NA
SRR3095847		8345031485	3831	PAIRED	SAMN04390203	Apis_mellifera	RNA-Seq	PolyA	TRANSCRIPTOMIC					larvae body	NA
SRR3095848		5102621301	2271	PAIRED	SAMN04390203	Apis_mellifera	RNA-Seq	PolyA	TRANSCRIPTOMIC					larvae body	NA
SRR3095849		4947582269	2219	PAIRED	SAMN04390203	Apis_mellifera	RNA-Seq	PolyA	TRANSCRIPTOMIC					larvae body	NA
SRR3095850		5060852543	2270	PAIRED	SAMN04390203	Apis_mellifera	RNA-Seq	PolyA	TRANSCRIPTOMIC					larvae body	NA
SRR3095478		5060513920	2341	PAIRED	SAMN04390236	Apis_mellifera	RNA-Seq	PolyA	TRANSCRIPTOMIC					larvae body	NA
SRR3095479		5118537632	2360	PAIRED	SAMN04390236	Apis_mellifera	RNA-Seq	PolyA	TRANSCRIPTOMIC					larvae body	NA
SRR3095480		5074589701	2294	PAIRED	SAMN04390236	Apis_mellifera	RNA-Seq	PolyA	TRANSCRIPTOMIC					larvae body	NA
SRR3095836		7716179877	3706	PAIRED	SAMN04390236	Apis_mellifera	RNA-Seq	PolyA	TRANSCRIPTOMIC					larvae body	NA
SRR3095837		7122107371	3466	PAIRED	SAMN04390236	Apis_mellifera	RNA-Seq	PolyA	TRANSCRIPTOMIC					larvae body	NA
SRR3095838		9061314320	4327	PAIRED	SAMN04390236	Apis_mellifera	RNA-Seq	PolyA	TRANSCRIPTOMIC					larvae body	NA
SRR3095839		4773395178	2157	PAIRED	SAMN04390236	Apis_mellifera	RNA-Seq	PolyA	TRANSCRIPTOMIC					larvae body	NA
SRR3095842		4862876896	2174	PAIRED	SAMN04390236	Apis_mellifera	RNA-Seq	PolyA	TRANSCRIPTOMIC					larvae body	NA
SRR3095843		4874661543	2201	PAIRED	SAMN04390236	Apis_mellifera	RNA-Seq	PolyA	TRANSCRIPTOMIC					larvae body	NA
SRR3095870		7992725913	3702	PAIRED	SAMN04390201	Apis_mellifera	RNA-Seq	PolyA	TRANSCRIPTOMIC					larvae body	NA
SRR3095871		8067273143	3714	PAIRED	SAMN04390201	Apis_mellifera	RNA-Seq	PolyA	TRANSCRIPTOMIC					larvae body	NA
SRR3095872		8705632600	4015	PAIRED	SAMN04390201	Apis_mellifera	RNA-Seq	PolyA	TRANSCRIPTOMIC					larvae body	NA
SRR3095873		5060513920	2341	PAIRED	SAMN04390201	Apis_mellifera	RNA-Seq	PolyA	TRANSCRIPTOMIC					larvae body	NA
SRR3095874		5118537632	2360	PAIRED	SAMN04390201	Apis_mellifera	RNA-Seq	PolyA	TRANSCRIPTOMIC					larvae body	NA
SRR3095876		5074589701	2294	PAIRED	SAMN04390201	Apis_mellifera	RNA-Seq	PolyA	TRANSCRIPTOMIC					larvae body	NA
SRR3144561		5311952289	2383	PAIRED	SAMN04450254	Apis_mellifera	RNA-Seq	PolyA	TRANSCRIPTOMIC					head,chest	NA
SRR3144562		5125563118	2120	PAIRED	SAMN04450254	Apis_mellifera	RNA-Seq	PolyA	TRANSCRIPTOMIC					head,chest	NA
SRR3144563		3813725160	1576	PAIRED	SAMN04450254	Apis_mellifera	RNA-Seq	PolyA	TRANSCRIPTOMIC					head,chest	NA
SRR3144564		6144926583	2533	PAIRED	SAMN04450253	Apis_mellifera	RNA-Seq	PolyA	TRANSCRIPTOMIC					head,chest	NA
SRR3144566		5006932377	2051	PAIRED	SAMN04450253	Apis_mellifera	RNA-Seq	PolyA	TRANSCRIPTOMIC					head,chest	NA
SRR3144567		3315633804	1446	PAIRED	SAMN04450253	Apis_mellifera	RNA-Seq	PolyA	TRANSCRIPTOMIC					head,chest	NA
SRR3033249		3524289152	2221	PAIRED	SAMN04351088	Apis_mellifera	RNA-Seq	cDNA	TRANSCRIPTOMIC					Eviscerated abdomen with attached fat bodies and inactive ovaries	Adult workers &gt;18 days post emergence
SRR3033250		2965155576	1832	PAIRED	SAMN04351089	Apis_mellifera	RNA-Seq	cDNA	TRANSCRIPTOMIC					Eviscerated abdomen with attached fat bodies and inactive ovaries	Adult workers &gt;18 days post emergence
SRR3033251		4394118120	2743	PAIRED	SAMN04351090	Apis_mellifera	RNA-Seq	cDNA	TRANSCRIPTOMIC					Eviscerated abdomen with attached fat bodies and inactive ovaries	Adult workers &gt;18 days post emergence
ERR413293		986475282	684	SINGLE	SAMEA2336979	Apis_mellifera	RNA-Seq	RANDOM	TRANSCRIPTOMIC					NA	NA
ERR413294		1160668568	808	SINGLE	SAMEA2336980	Apis_mellifera	RNA-Seq	RANDOM	TRANSCRIPTOMIC					NA	NA
ERR413295		1038603907	720	SINGLE	SAMEA2336981	Apis_mellifera	RNA-Seq	RANDOM	TRANSCRIPTOMIC					NA	NA
ERR413296		917018491	644	SINGLE	SAMEA2336982	Apis_mellifera	RNA-Seq	RANDOM	TRANSCRIPTOMIC					NA	NA
ERR413297		898873336	610	SINGLE	SAMEA2336983	Apis_mellifera	RNA-Seq	RANDOM	TRANSCRIPTOMIC					NA	NA
ERR413298		965126811	653	SINGLE	SAMEA2336984	Apis_mellifera	RNA-Seq	RANDOM	TRANSCRIPTOMIC					NA	NA
ERR413299		900771126	612	SINGLE	SAMEA2336985	Apis_mellifera	RNA-Seq	RANDOM	TRANSCRIPTOMIC					NA	NA
ERR413300		1009775780	684	SINGLE	SAMEA2336986	Apis_mellifera	RNA-Seq	RANDOM	TRANSCRIPTOMIC					NA	NA
ERR413301		798301576	541	SINGLE	SAMEA2336987	Apis_mellifera	RNA-Seq	RANDOM	TRANSCRIPTOMIC					NA	NA
ERR413302		949861166	646	SINGLE	SAMEA2336988	Apis_mellifera	RNA-Seq	RANDOM	TRANSCRIPTOMIC					NA	NA
ERR413303		877614351	591	SINGLE	SAMEA2336989	Apis_mellifera	RNA-Seq	RANDOM	TRANSCRIPTOMIC					NA	NA
ERR413304		997460446	671	SINGLE	SAMEA2336990	Apis_mellifera	RNA-Seq	RANDOM	TRANSCRIPTOMIC					NA	NA
ERR413305		892267633	601	SINGLE	SAMEA2336991	Apis_mellifera	RNA-Seq	RANDOM	TRANSCRIPTOMIC					NA	NA
ERR528750		978825643	679	SINGLE	SAMEA2591288	Apis_mellifera	RNA-Seq	RANDOM	TRANSCRIPTOMIC	female				NA	NA
ERR528751		1073644645	746	SINGLE	SAMEA2591289	Apis_mellifera	RNA-Seq	RANDOM	TRANSCRIPTOMIC	female				NA	NA
ERR528752		988327723	685	SINGLE	SAMEA2591290	Apis_mellifera	RNA-Seq	RANDOM	TRANSCRIPTOMIC	female				NA	NA
ERR528753		1016981625	704	SINGLE	SAMEA2591291	Apis_mellifera	RNA-Seq	RANDOM	TRANSCRIPTOMIC	femLE				NA	NA
ERR528754		1036013560	718	SINGLE	SAMEA2591292	Apis_mellifera	RNA-Seq	RANDOM	TRANSCRIPTOMIC	female				NA	NA
SRR2153283		3401658632	2039	PAIRED	SAMN03975661	Apis_mellifera	RNA-Seq	PolyA	TRANSCRIPTOMIC	not collected				whole larva body	NA
SRR2153286		3265167987	1966	PAIRED	SAMN03975661	Apis_mellifera	RNA-Seq	PolyA	TRANSCRIPTOMIC	not collected				whole larva body	NA
SRR2153287		3156382673	1879	PAIRED	SAMN03975661	Apis_mellifera	RNA-Seq	PolyA	TRANSCRIPTOMIC	not collected				whole larva body	NA
SRR2153280		3421917409	2055	PAIRED	SAMN03975662	Apis_mellifera	RNA-Seq	PolyA	TRANSCRIPTOMIC	not collected				whole larva body	NA
SRR2153281		3435886994	2067	PAIRED	SAMN03975662	Apis_mellifera	RNA-Seq	PolyA	TRANSCRIPTOMIC	not collected				whole larva body	NA
SRR2153282		3291695850	1974	PAIRED	SAMN03975662	Apis_mellifera	RNA-Seq	PolyA	TRANSCRIPTOMIC	not collected				whole larva body	NA
SRR2153257		3256439637	1952	PAIRED	SAMN03975636	Apis_mellifera	RNA-Seq	PolyA	TRANSCRIPTOMIC	not collected				whole larva body	NA
SRR2153259		3329745103	2018	PAIRED	SAMN03975636	Apis_mellifera	RNA-Seq	PolyA	TRANSCRIPTOMIC	not collected				whole larva body	NA
SRR2153260		3707089435	2243	PAIRED	SAMN03975636	Apis_mellifera	RNA-Seq	PolyA	TRANSCRIPTOMIC	not collected				whole larva body	NA
SRR2153227		3621149122	2189	PAIRED	SAMN03975637	Apis_mellifera	RNA-Seq	PolyA	TRANSCRIPTOMIC	not collected				whole larva body	NA
SRR2153228		3308419230	2005	PAIRED	SAMN03975637	Apis_mellifera	RNA-Seq	PolyA	TRANSCRIPTOMIC	not collected				whole larva body	NA
SRR2153229		4008211069	2420	PAIRED	SAMN03975637	Apis_mellifera	RNA-Seq	PolyA	TRANSCRIPTOMIC	not collected				whole larva body	NA
SRR2146246		3383786221	1894	PAIRED	SAMN03959806	Apis_mellifera	RNA-Seq	cDNA	TRANSCRIPTOMIC					hypopharyngeal gland	NA
SRR2146247		3471360205	1947	PAIRED	SAMN03959807	Apis_mellifera	RNA-Seq	cDNA	TRANSCRIPTOMIC					hypopharyngeal gland	NA
SRR2146248		3655941236	2057	PAIRED	SAMN03959808	Apis_mellifera	RNA-Seq	cDNA	TRANSCRIPTOMIC					hypopharyngeal gland	NA
SRR2146249		3594297206	2037	PAIRED	SAMN03959809	Apis_mellifera	RNA-Seq	cDNA	TRANSCRIPTOMIC					hypopharyngeal gland	NA
SRR2146250		3850607838	2146	PAIRED	SAMN03959810	Apis_mellifera	RNA-Seq	cDNA	TRANSCRIPTOMIC					hypopharyngeal gland	NA
SRR2146251		3857581850	2151	PAIRED	SAMN03959811	Apis_mellifera	RNA-Seq	cDNA	TRANSCRIPTOMIC					hypopharyngeal gland	NA
SRR2032888		3190223956	2201	PAIRED	SAMN03396611	Apis_mellifera	RNA-Seq	unspecified	TRANSCRIPTOMIC	female				brain	adult
SRR2032907		6830608805	4735	PAIRED	SAMN03396612	Apis_mellifera	RNA-Seq	unspecified	TRANSCRIPTOMIC	female				brain	adult
SRR2032921		4274988200	2958	PAIRED	SAMN03396613	Apis_mellifera	RNA-Seq	unspecified	TRANSCRIPTOMIC	female				brain	adult
SRR2032817		1312917297	853	PAIRED	SAMN03396607	Apis_mellifera	RNA-Seq	unspecified	TRANSCRIPTOMIC	female				whole body	adult
SRR2032827		1119309892	727	PAIRED	SAMN03396608	Apis_mellifera	RNA-Seq	unspecified	TRANSCRIPTOMIC	female				whole body	adult
SRR2032812		3796743825	2449	PAIRED	SAMN03396603	Apis_mellifera	RNA-Seq	unspecified	TRANSCRIPTOMIC	female				whole body	larvae
SRR2032813		3471623130	2227	PAIRED	SAMN03396604	Apis_mellifera	RNA-Seq	unspecified	TRANSCRIPTOMIC	female				whole body	larvae
SRR2032930		8525499199	5893	PAIRED	SAMN03396614	Apis_mellifera	RNA-Seq	unspecified	TRANSCRIPTOMIC	female				brain	adult
SRR2033014		1821280815	1260	PAIRED	SAMN03396615	Apis_mellifera	RNA-Seq	unspecified	TRANSCRIPTOMIC	female				brain	adult
SRR2033015		8443896736	5834	PAIRED	SAMN03396616	Apis_mellifera	RNA-Seq	unspecified	TRANSCRIPTOMIC	female				brain	adult
SRR2032844		3931393457	2548	PAIRED	SAMN03396609	Apis_mellifera	RNA-Seq	unspecified	TRANSCRIPTOMIC	female				whole body	adult
SRR2032857		5309172597	3447	PAIRED	SAMN03396610	Apis_mellifera	RNA-Seq	unspecified	TRANSCRIPTOMIC	female				whole body	adult
SRR2032814		3210001330	2066	PAIRED	SAMN03396605	Apis_mellifera	RNA-Seq	unspecified	TRANSCRIPTOMIC	female				whole body	larvae
SRR2032816		3860110451	2479	PAIRED	SAMN03396606	Apis_mellifera	RNA-Seq	unspecified	TRANSCRIPTOMIC	female				whole body	larvae
SRR1798739		1114949650	709	SINGLE	SAMN03339728	Apis_mellifera	RNA-Seq	cDNA	TRANSCRIPTOMIC					brain	adult
SRR1798740		1434127600	921	SINGLE	SAMN03339732	Apis_mellifera	RNA-Seq	cDNA	TRANSCRIPTOMIC					brain	adult
SRR1798741		1351471850	856	SINGLE	SAMN03339730	Apis_mellifera	RNA-Seq	cDNA	TRANSCRIPTOMIC					brain	adult
SRR1798742		1521542700	993	SINGLE	SAMN03339729	Apis_mellifera	RNA-Seq	cDNA	TRANSCRIPTOMIC					brain	adult
SRR1798743		1334856500	860	SINGLE	SAMN03339736	Apis_mellifera	RNA-Seq	cDNA	TRANSCRIPTOMIC					brain	adult
SRR1798744		1529595850	982	SINGLE	SAMN03339735	Apis_mellifera	RNA-Seq	cDNA	TRANSCRIPTOMIC					brain	adult
SRR1798745		1479440650	954	SINGLE	SAMN03339725	Apis_mellifera	RNA-Seq	cDNA	TRANSCRIPTOMIC					brain	adult
SRR1798746		1593960850	1038	SINGLE	SAMN03339733	Apis_mellifera	RNA-Seq	cDNA	TRANSCRIPTOMIC					brain	adult
SRR1798747		1573067300	1029	SINGLE	SAMN03339734	Apis_mellifera	RNA-Seq	cDNA	TRANSCRIPTOMIC					brain	adult
SRR1798748		1735594450	1124	SINGLE	SAMN03339731	Apis_mellifera	RNA-Seq	cDNA	TRANSCRIPTOMIC					brain	adult
SRR1798749		1396242250	912	SINGLE	SAMN03339726	Apis_mellifera	RNA-Seq	cDNA	TRANSCRIPTOMIC					brain	adult
SRR1798750		1965091950	1274	SINGLE	SAMN03339727	Apis_mellifera	RNA-Seq	cDNA	TRANSCRIPTOMIC					brain	adult
SRR1790682		4716977220	3029	PAIRED	SAMN03329990	Apis_mellifera	RNA-Seq	cDNA	TRANSCRIPTOMIC					Eviscerated abdomen with attached fat bodies	Adults (&lt;48 hours post emergence)
SRR1790683		4702820400	2870	PAIRED	SAMN03329991	Apis_mellifera	RNA-Seq	cDNA	TRANSCRIPTOMIC					Eviscerated abdomen with attached fat bodies	Adults (&lt;48 hours post emergence)
SRR1790684		4786411680	3076	PAIRED	SAMN03329987	Apis_mellifera	RNA-Seq	cDNA	TRANSCRIPTOMIC					Eviscerated abdomen with attached fat bodies	Adults (&lt;48 hours post emergence)
SRR1790685		4774609980	2915	PAIRED	SAMN03329989	Apis_mellifera	RNA-Seq	cDNA	TRANSCRIPTOMIC					Eviscerated abdomen with attached fat bodies	Adults (&lt;48 hours post emergence)
[truncated: 4,507 more rows]
