# Supplementary material for: Endoparasitoid lifestyle promotes endogenization and domestication of dsDNA viruses
Source: eLife. 2023 Jun 6;12:e85993. doi: 10.7554/eLife.85993 (PMC10259472; doi:10.7554/eLife.85993)
Supplement: Supplementary file 11. [file elife-85993-supp11.xlsx]

## Sheet: P.orseoliae_EVEs
query (Free-living viruses sequences)	target (Platygaster-EVES)	pident	alnlen	mismatch	gapopen	qstart	qend	tstart	tend	evalue	bits	qlen	tlen	tcov	qcov	Cluster	Names	scaffolds	GC	Arithmetic_cov_depth	Scaf_length	Median_cov_depth	scaf_name	scaf_length	cov_depth_candidat	cov_depth_BUSCO	pvalue_cov	count_duplicate	diff_length	HSP_group	strand	overlapping_group	full_loci_name	ORF_query	ORF_target	ORF_start	ORF_end	ORF_strand	Overlapp_ORF_EVEs	ORF_perc	start-end	start	end	Overlapp_group	Pseudogenized	count_repeat	count_euk	euk_count_plus_repeat	Scaffold_score
PoFV_scaffold_64266_orf001	PoFV_scaffold_15031:5702-6766(+)	88.4	355	41	0	1	354	1	355	4.694e-214	655	355	355	1.0	0.997	Cluster69	PoFV_scaffold_15031:5702-6766(+)	scaffold_15031	0.307585685483871	31.0516698172653	7935.0	32.0	scaffold_15031	418	32.0	33.96815107102593	0.0935738444193912	1			+	19	PoFV_scaffold_15031:5702-6766(+)	PoFV_scaffold_15031:5702-6766(+)	scaffold_15031_ORF.10;5701-6766(+)	5701.0	6766.0	-		1.0009398496240602	5702-6766	5702	6766	17.0	no	0.0	0.0	0.0	C
LbFV_YP_009345606.1	PoFV_scaffold_15031:5702-6766(+)	23.3	346	251	0	4	331	9	354	1.822e-24	103	334	355	0.975	0.982	Cluster69	PoFV_scaffold_15031:5702-6766(+)	scaffold_15031	0.307585685483871	31.0516698172653	7935.0	32.0	scaffold_15031	418	32.0	33.96815107102593	0.0935738444193912	1			+	19	PoFV_scaffold_15031:5702-6766(+)	PoFV_scaffold_15031:5702-6766(+)	scaffold_15031_ORF.10;5701-6766(+)	5701.0	6766.0	-		1.0009398496240602	5702-6766	5702	6766	17.0	no	0.0	0.0	0.0	C
DFV_QKN22457.1	PoFV_scaffold_15031:5702-6766(+)	21.6	370	262	0	13	382	20	354	1.748e-21	95	398	355	0.944	0.93	Cluster69	PoFV_scaffold_15031:5702-6766(+)	scaffold_15031	0.307585685483871	31.0516698172653	7935.0	32.0	scaffold_15031	418	32.0	33.96815107102593	0.0935738444193912	1			+	19	PoFV_scaffold_15031:5702-6766(+)	PoFV_scaffold_15031:5702-6766(+)	scaffold_15031_ORF.10;5701-6766(+)	5701.0	6766.0	-		1.0009398496240602	5702-6766	5702	6766	17.0	no	0.0	0.0	0.0	C
PoFV_scaffold_64266_orf001	PoFV_scaffold_18363:1151-169(-)	78.1	277	60	0	27	303	1	277	4.886e-141	444	355	327	0.847	0.78	Cluster69	PoFV_scaffold_18363:1151-169(-)	scaffold_18363	0.346588767433095	31.1832233741753	5305.0	32.0	scaffold_18363	102	32.0	33.96815107102593	0.0935738444193912	3	17.0	36.0	-	31	PoFV_scaffold_18363:1151-169(-)	PoFV_scaffold_18363:1151-169(-)	scaffold_18363_ORF.15;284-638(-)	284.0	638.0	-		0.3604887983706721	1151-169	169	1151	26.0	yes	0.0	0.0	0.0	C
PoFV_scaffold_64266_orf001	PoFV_scaffold_18363:1151-169(-)	78.1	277	60	0	27	303	1	277	4.886e-141	444	355	327	0.847	0.78	Cluster69	PoFV_scaffold_18363:1151-169(-)	scaffold_18363	0.346588767433095	31.1832233741753	5305.0	32.0	scaffold_18363	102	32.0	33.96815107102593	0.0935738444193912	3	17.0	36.0	-	31	PoFV_scaffold_18363:1151-169(-)	PoFV_scaffold_18363:1151-169(-)	scaffold_18363_ORF.14;749-941(-)	749.0	941.0	-		0.1955193482688391	1151-169	169	1151	27.0	yes	0.0	0.0	0.0	C
LbFV_YP_009345606.1	PoFV_scaffold_18363:1151-169(-)	20.8	302	230	0	39	329	18	319	1.335e-14	72	334	327	0.924	0.871	Cluster69	PoFV_scaffold_18363:1151-169(-)	scaffold_18363	0.346588767433095	31.1832233741753	5305.0	32.0	scaffold_18363	102	32.0	33.96815107102593	0.0935738444193912	3	17.0	36.0	-	31	PoFV_scaffold_18363:1151-169(-)	PoFV_scaffold_18363:1151-169(-)	scaffold_18363_ORF.15;284-638(-)	284.0	638.0	-		0.3604887983706721	1151-169	169	1151	26.0	yes	0.0	0.0	0.0	C
LbFV_YP_009345606.1	PoFV_scaffold_18363:1151-169(-)	20.8	302	230	0	39	329	18	319	1.335e-14	72	334	327	0.924	0.871	Cluster69	PoFV_scaffold_18363:1151-169(-)	scaffold_18363	0.346588767433095	31.1832233741753	5305.0	32.0	scaffold_18363	102	32.0	33.96815107102593	0.0935738444193912	3	17.0	36.0	-	31	PoFV_scaffold_18363:1151-169(-)	PoFV_scaffold_18363:1151-169(-)	scaffold_18363_ORF.14;749-941(-)	749.0	941.0	-		0.1955193482688391	1151-169	169	1151	27.0	yes	0.0	0.0	0.0	C
DFV_QKN22457.1	PoFV_scaffold_18363:1151-169(-)	20.8	307	215	0	25	331	6	277	9.784e-15	74	398	327	0.832	0.771	Cluster69	PoFV_scaffold_18363:1151-169(-)	scaffold_18363	0.346588767433095	31.1832233741753	5305.0	32.0	scaffold_18363	102	32.0	33.96815107102593	0.0935738444193912	3	17.0	36.0	-	31	PoFV_scaffold_18363:1151-169(-)	PoFV_scaffold_18363:1151-169(-)	scaffold_18363_ORF.15;284-638(-)	284.0	638.0	-		0.3604887983706721	1151-169	169	1151	26.0	yes	0.0	0.0	0.0	C
DFV_QKN22457.1	PoFV_scaffold_18363:1151-169(-)	20.8	307	215	0	25	331	6	277	9.784e-15	74	398	327	0.832	0.771	Cluster69	PoFV_scaffold_18363:1151-169(-)	scaffold_18363	0.346588767433095	31.1832233741753	5305.0	32.0	scaffold_18363	102	32.0	33.96815107102593	0.0935738444193912	3	17.0	36.0	-	31	PoFV_scaffold_18363:1151-169(-)	PoFV_scaffold_18363:1151-169(-)	scaffold_18363_ORF.14;749-941(-)	749.0	941.0	-		0.1955193482688391	1151-169	169	1151	27.0	yes	0.0	0.0	0.0	C
PoFV_scaffold_11706_orf002	PoFV_scaffold_15031:1850-3133(+)	67.3	428	135	0	1	414	1	428	8.688999999999999e-185	574	418	428	1.0	0.99	Cluster502	PoFV_scaffold_15031:1850-3133(+)	scaffold_15031	0.307585685483871	31.0516698172653	7935.0	32.0	scaffold_15031	418	32.0	33.96815107102593	0.0935738444193912	2	3.0	3.0	+	18	PoFV_scaffold_15031:1850-3133(+)	PoFV_scaffold_15031:1850-3133(+)	scaffold_15031_ORF.8;2476-3193(+)	2476.0	3193.0	-		0.558846453624318	1850-3133	1850	3133	16.0	yes	0.0	0.0	0.0	C
PoFV_scaffold_11706_orf002	PoFV_scaffold_15031:1850-3133(+)	67.3	428	135	0	1	414	1	428	8.688999999999999e-185	574	418	428	1.0	0.99	Cluster502	PoFV_scaffold_15031:1850-3133(+)	scaffold_15031	0.307585685483871	31.0516698172653	7935.0	32.0	scaffold_15031	418	32.0	33.96815107102593	0.0935738444193912	2	3.0	3.0	+	18	PoFV_scaffold_15031:1850-3133(+)	PoFV_scaffold_15031:1850-3133(+)	scaffold_15031_ORF.7;1849-2290(+)	1849.0	2290.0	-		0.3437256430241621	1850-3133	1850	3133	15.0	yes	0.0	0.0	0.0	C
PoFV_scaffold_21671_orf005	PoFV_scaffold_15031:7485-7695(+)	73.1	53	14	0	20	71	1	53	1.123e-20	81	72	70	0.757	0.722	Cluster148	PoFV_scaffold_15031:7485-7695(+)	scaffold_15031	0.307585685483871	31.0516698172653	7935.0	32.0	scaffold_15031	418	32.0	33.96815107102593	0.0935738444193912	2	29.0	18.0	+	20	PoFV_scaffold_15031:7485-7695(+)								7485-7695	7485	7695		yes	0.0	0.0	0.0	C
PoFV_scaffold_15158_orf001	PoFV_scaffold_15031:7485-7695(+)	71.6	45	12	0	20	62	1	45	4.144e-16	68	66	70	0.643	0.652	Cluster148	PoFV_scaffold_15031:7485-7695(+)	scaffold_15031	0.307585685483871	31.0516698172653	7935.0	32.0	scaffold_15031	418	32.0	33.96815107102593	0.0935738444193912	2	29.0	18.0	+	20	PoFV_scaffold_15031:7485-7695(+)								7485-7695	7485	7695		yes	0.0	0.0	0.0	C
PoFV_scaffold_64266_orf003	PoFV_scaffold_17380:5144-5340(+)	61.0	42	15	0	9	48	21	62	3.513e-11	53	57	65	0.646	0.702	Cluster148	PoFV_scaffold_17380:5144-5340(+)	scaffold_17380	0.297796093889984	32.5161290322581	5580.0	33.0	scaffold_17380	156	33.0	33.96815107102593	0.2068771138669673	2	28.0	19.0	+	30	PoFV_scaffold_17380:5144-5340(+)								5144-5340	5144	5340		yes	0.0	0.0	0.0	C
PoFV_scaffold_21671_orf005	PoFV_scaffold_17380:5144-5340(+)	65.1	46	14	0	25	70	1	41	4.754e-14	62	72	65	0.631	0.639	Cluster148	PoFV_scaffold_17380:5144-5340(+)	scaffold_17380	0.297796093889984	32.5161290322581	5580.0	33.0	scaffold_17380	156	33.0	33.96815107102593	0.2068771138669673	2	28.0	19.0	+	30	PoFV_scaffold_17380:5144-5340(+)								5144-5340	5144	5340		yes	0.0	0.0	0.0	C
PoFV_scaffold_15158_orf001	PoFV_scaffold_17380:5144-5340(+)	79.4	38	8	0	25	62	3	40	5.286e-15	64	66	65	0.585	0.576	Cluster148	PoFV_scaffold_17380:5144-5340(+)	scaffold_17380	0.297796093889984	32.5161290322581	5580.0	33.0	scaffold_17380	156	33.0	33.96815107102593	0.2068771138669673	2	28.0	19.0	+	30	PoFV_scaffold_17380:5144-5340(+)								5144-5340	5144	5340		yes	0.0	0.0	0.0	C
PoFV_scaffold_64266_orf003	PoFV_scaffold_399393:3-200(+)	78.4	44	9	0	1	42	23	66	3.079e-18	73	57	66	0.667	0.737	Cluster148	PoFV_scaffold_399393:3-200(+)	scaffold_399393	0.282178217821782	26.1990049751244	201.0	33.0	scaffold_399393	57	33.0	33.96815107102593	0.2068771138669673	2	70.0	37.0	+	79	PoFV_scaffold_399393:3-200(+)								3-200	3	200		yes	0.0	0.0	0.0	C
PoFV_scaffold_1254_orf001	PoFV_scaffold_399393:3-200(+)	80.0	35	7	0	26	60	14	48	2.125e-13	60	70	66	0.53	0.5	Cluster148	PoFV_scaffold_399393:3-200(+)	scaffold_399393	0.282178217821782	26.1990049751244	201.0	33.0	scaffold_399393	57	33.0	33.96815107102593	0.2068771138669673	2	70.0	37.0	+	79	PoFV_scaffold_399393:3-200(+)								3-200	3	200		yes	0.0	0.0	0.0	C
PoFV_scaffold_21671_orf005	PoFV_scaffold_399393:3-200(+)	82.2	30	5	0	1	30	23	52	5.24e-11	53	72	66	0.455	0.417	Cluster148	PoFV_scaffold_399393:3-200(+)	scaffold_399393	0.282178217821782	26.1990049751244	201.0	33.0	scaffold_399393	57	33.0	33.96815107102593	0.2068771138669673	2	70.0	37.0	+	79	PoFV_scaffold_399393:3-200(+)								3-200	3	200		yes	0.0	0.0	0.0	C
PoFV_scaffold_64266_orf003	PoFV_scaffold_495318:58-153(+)	85.1	32	5	0	13	44	1	32	2.933e-13	59	57	32	1.0	0.561	Cluster148	PoFV_scaffold_495318:58-153(+)	scaffold_495318	0.301282051282051	23.3483870967742	155.0	26.0	scaffold_495318	57	26.0	33.96815107102593	0.0	1			+	86	PoFV_scaffold_495318:58-153(+)								58-153	58	153		no	0.0	0.0	0.0	C
PoFV_scaffold_64266_orf003	PoFV_scaffold_542148:1-96(+)	85.1	32	5	0	13	44	1	32	2.933e-13	59	57	32	1.0	0.561	Cluster148	PoFV_scaffold_542148:1-96(+)	scaffold_542148	0.261194029850746	20.4661654135338	133.0	21.0	scaffold_542148	57	21.0	33.96815107102593	0.0	1			+	88	PoFV_scaffold_542148:1-96(+)								1996-01-01	1	96		no	0.0	0.0	0.0	C
PoFV_scaffold_64266_orf003	PoFV_scaffold_119648:454-764(+)	53.6	50	22	0	1	48	51	100	1.855e-11	54	57	103	0.485	0.842	Cluster148	PoFV_scaffold_119648:454-764(+)	scaffold_119648	0.259605399792316	23.5966735966736	962.0	23.0	scaffold_119648	72	23.0	33.96815107102593	0.0	2	2.0	16.0	+	13	PoFV_scaffold_119648:454-764(+)								454-764	454	764		yes	0.0	0.0	0.0	C
PoFV_scaffold_1254_orf001	PoFV_scaffold_119648:454-764(+)	45.3	60	32	0	6	65	22	81	1.243e-10	52	70	103	0.583	0.857	Cluster148	PoFV_scaffold_119648:454-764(+)	scaffold_119648	0.259605399792316	23.5966735966736	962.0	23.0	scaffold_119648	72	23.0	33.96815107102593	0.0	2	2.0	16.0	+	13	PoFV_scaffold_119648:454-764(+)								454-764	454	764		yes	0.0	0.0	0.0	C
PoFV_scaffold_21671_orf005	PoFV_scaffold_119648:454-764(+)	62.1	48	16	0	23	70	1	43	8.984e-14	61	72	103	0.417	0.667	Cluster148	PoFV_scaffold_119648:454-764(+)	scaffold_119648	0.259605399792316	23.5966735966736	962.0	23.0	scaffold_119648	72	23.0	33.96815107102593	0.0	2	2.0	16.0	+	13	PoFV_scaffold_119648:454-764(+)								454-764	454	764		yes	0.0	0.0	0.0	C
PoFV_scaffold_15158_orf001	PoFV_scaffold_119648:454-764(+)	81.6	38	7	0	25	62	5	42	1.077e-15	66	66	103	0.369	0.576	Cluster148	PoFV_scaffold_119648:454-764(+)	scaffold_119648	0.259605399792316	23.5966735966736	962.0	23.0	scaffold_119648	72	23.0	33.96815107102593	0.0	2	2.0	16.0	+	13	PoFV_scaffold_119648:454-764(+)								454-764	454	764		yes	0.0	0.0	0.0	C
PoFV_scaffold_1254_orf001	PoFV_scaffold_7821:209-96(-)	63.7	38	13	0	17	52	1	38	4.449e-10	51	70	38	1.0	0.514	Cluster148	PoFV_scaffold_7821:209-96(-)	scaffold_7821	0.31157978511739	32.6687669960868	15077.0	33.0	scaffold_7821	123	33.0	33.96815107102593	0.2068771138669673	1			-	104	PoFV_scaffold_7821:209-96(-)								209-96	96	209		no	0.0	0.0	0.0	C
PoFV_scaffold_21671_orf005	PoFV_scaffold_19741:851-549(-)	79.7	41	8	0	25	65	1	41	1.128e-16	70	72	101	0.406	0.569	Cluster148	PoFV_scaffold_19741:851-549(-)	scaffold_19741	0.267485119047619	27.8394418604651	5375.0	26.0	scaffold_19741	102	26.0	33.96815107102593	0.0	2	29.0	20.0	-	39	PoFV_scaffold_19741:851-549(-)								851-549	549	851		yes	0.0	0.0	0.0	C
PoFV_scaffold_15158_orf001	PoFV_scaffold_19741:851-549(-)	83.3	39	6	0	25	63	3	41	8.445e-17	70	66	101	0.386	0.591	Cluster148	PoFV_scaffold_19741:851-549(-)	scaffold_19741	0.267485119047619	27.8394418604651	5375.0	26.0	scaffold_19741	102	26.0	33.96815107102593	0.0	2	29.0	20.0	-	39	PoFV_scaffold_19741:851-549(-)								851-549	549	851		yes	0.0	0.0	0.0	C
PoFV_scaffold_21671_orf005	PoFV_scaffold_126700:535-732(+)	74.8	42	10	0	9	50	25	66	1.436e-15	66	72	66	0.636	0.583	Cluster148	PoFV_scaffold_126700:535-732(+)	scaffold_126700	0.27290198590647	26.0384615384615	1560.0	26.0	scaffold_126700	66	26.0	33.96815107102593	0.0	2	28.0	17.0	+	15	PoFV_scaffold_126700:535-732(+)								535-732	535	732		yes	0.0	0.0	0.0	C
PoFV_scaffold_15158_orf001	PoFV_scaffold_126700:535-732(+)	81.5	39	7	0	25	63	7	45	3.015e-16	68	66	66	0.591	0.591	Cluster148	PoFV_scaffold_126700:535-732(+)	scaffold_126700	0.27290198590647	26.0384615384615	1560.0	26.0	scaffold_126700	66	26.0	33.96815107102593	0.0	2	28.0	17.0	+	15	PoFV_scaffold_126700:535-732(+)								535-732	535	732		yes	0.0	0.0	0.0	C
PoFV_scaffold_21671_orf005	PoFV_scaffold_294269:317-210(-)	78.9	38	7	0	13	50	1	36	9.686e-15	64	72	36	1.0	0.528	Cluster148	PoFV_scaffold_294269:317-210(-)	scaffold_294269	0.179245283018868	38.3301886792453	318.0	38.0	scaffold_294269	70	38.0	33.96815107102593	0.0095828635851183	1			-	57	PoFV_scaffold_294269:317-210(-)								317-210	210	317		no	0.0	0.0	0.0	C
PoFV_scaffold_15158_orf001	PoFV_scaffold_294269:317-210(-)	75.2	36	9	0	13	48	1	36	1.187e-12	58	66	36	1.0	0.545	Cluster148	PoFV_scaffold_294269:317-210(-)	scaffold_294269	0.179245283018868	38.3301886792453	318.0	38.0	scaffold_294269	70	38.0	33.96815107102593	0.0095828635851183	1			-	57	PoFV_scaffold_294269:317-210(-)								317-210	210	317		no	0.0	0.0	0.0	C
PoFV_scaffold_21671_orf005	PoFV_scaffold_485751:66-161(+)	79.6	34	6	0	13	46	1	32	1.147e-12	58	72	32	1.0	0.472	Cluster148	PoFV_scaffold_485751:66-161(+)	scaffold_485751	0.276073619631902	19.4382716049383	162.0	22.0	scaffold_485751	66	22.0	33.96815107102593	0.0	1			+	85	PoFV_scaffold_485751:66-161(+)								66-161	66	161		no	0.0	0.0	0.0	C
PoFV_scaffold_15158_orf001	PoFV_scaffold_485751:66-161(+)	77.6	32	7	0	13	44	1	32	3.958e-11	53	66	32	1.0	0.485	Cluster148	PoFV_scaffold_485751:66-161(+)	scaffold_485751	0.276073619631902	19.4382716049383	162.0	22.0	scaffold_485751	66	22.0	33.96815107102593	0.0	1			+	85	PoFV_scaffold_485751:66-161(+)								66-161	66	161		no	0.0	0.0	0.0	C
PoFV_scaffold_21671_orf005	PoFV_scaffold_139938:334-230(-)	76.1	35	8	0	20	54	1	35	2.981e-12	57	72	35	1.0	0.486	Cluster148	PoFV_scaffold_139938:334-230(-)	scaffold_139938	0.243047158403869	19.7639225181598	826.0	21.0	scaffold_139938	66	21.0	33.96815107102593	0.0	1			-	16	PoFV_scaffold_139938:334-230(-)								334-230	230	334		no	0.0	0.0	0.0	C
PoFV_scaffold_15158_orf001	PoFV_scaffold_139938:334-230(-)	68.8	35	10	0	20	52	1	35	2.683e-10	51	66	35	1.0	0.5	Cluster148	PoFV_scaffold_139938:334-230(-)	scaffold_139938	0.243047158403869	19.7639225181598	826.0	21.0	scaffold_139938	66	21.0	33.96815107102593	0.0	1			-	16	PoFV_scaffold_139938:334-230(-)								334-230	230	334		no	0.0	0.0	0.0	C
PoFV_scaffold_21671_orf005	PoFV_scaffold_98611:1063-1149(+)	87.7	29	3	0	25	53	1	29	1.066e-11	55	72	29	1.0	0.403	Cluster148	PoFV_scaffold_98611:1063-1149(+)	scaffold_98611	0.274543874891399	33.3008695652174	1150.0	33.0	scaffold_98611	66	33.0	33.96815107102593	0.2068771138669673	1			+	141	PoFV_scaffold_98611:1063-1149(+)								1063-1149	1063	1149		no	0.0	0.0	0.0	C
PoFV_scaffold_15158_orf001	PoFV_scaffold_98611:1063-1149(+)	89.7	27	3	0	25	51	3	29	5.444e-11	53	66	29	0.931	0.409	Cluster148	PoFV_scaffold_98611:1063-1149(+)	scaffold_98611	0.274543874891399	33.3008695652174	1150.0	33.0	scaffold_98611	66	33.0	33.96815107102593	0.2068771138669673	1			+	141	PoFV_scaffold_98611:1063-1149(+)								1063-1149	1063	1149		no	0.0	0.0	0.0	C
PoFV_scaffold_21671_orf005	PoFV_scaffold_164441:198-106(-)	77.6	31	7	0	20	50	1	31	1.874e-10	52	72	31	1.0	0.431	Cluster148	PoFV_scaffold_164441:198-106(-)	scaffold_164441	0.291666666666667	21.1237410071942	695.0	22.0	scaffold_164441	72	22.0	33.96815107102593	0.0	1			-	23	PoFV_scaffold_164441:198-106(-)								198-106	106	198		no	0.0	0.0	0.0	C
PoFV_scaffold_21671_orf005	PoFV_scaffold_86840:323-216(-)	67.7	36	11	0	20	54	1	36	2.578e-10	51	72	36	1.0	0.486	Cluster148	PoFV_scaffold_86840:323-216(-)	scaffold_86840	0.214621059691482	20.5892617449664	1490.0	23.0	scaffold_86840	72	23.0	33.96815107102593	0.0	1			-	126	PoFV_scaffold_86840:323-216(-)								323-216	216	323		no	0.0	0.0	0.0	C
PoFV_scaffold_11706_orf003	PoFV_scaffold_15031:1081-1779(+)	80.3	249	46	0	1	249	1	233	5.343e-132	412	250	233	1.0	0.996	Cluster1048	PoFV_scaffold_15031:1081-1779(+)	scaffold_15031	0.307585685483871	31.0516698172653	7935.0	32.0	scaffold_15031	418	32.0	33.96815107102593	0.0935738444193912	1			+	17	PoFV_scaffold_15031:1081-1779(+)	PoFV_scaffold_15031:1081-1779(+)	scaffold_15031_ORF.2;570-1821(+)	570.0	1821.0	-		1.7922636103151863	1081-1779	1081	1779	14.0	no	0.0	0.0	0.0	C
PoFV_scaffold_21913_orf008	PoFV_scaffold_18363:2355-2699(+)	34.6	123	75	0	1	123	1	115	2.459e-16	72	136	115	1.0	0.904	Cluster301	PoFV_scaffold_18363:2355-2699(+)	scaffold_18363	0.346588767433095	31.1832233741753	5305.0	32.0	scaffold_18363	102	32.0	33.96815107102593	0.0935738444193912	1			+	33	PoFV_scaffold_18363:2355-2699(+)	PoFV_scaffold_18363:2355-2699(+)	scaffold_18363_ORF.7;2354-2723(+)	2354.0	2723.0	-		1.072674418604651	2355-2699	2355	2699	29.0	no	0.0	0.0	0.0	C
PoFV_scaffold_21913_orf008	PoFV_scaffold_19741:4280-4672(+)	68.0	131	41	0	1	130	1	131	7.179999999999999e-54	180	136	131	1.0	0.956	Cluster301	PoFV_scaffold_19741:4280-4672(+)	scaffold_19741	0.267485119047619	27.8394418604651	5375.0	26.0	scaffold_19741	102	26.0	33.96815107102593	0.0	1			+	44	PoFV_scaffold_19741:4280-4672(+)	PoFV_scaffold_19741:4280-4672(+)	scaffold_19741_ORF.3;4279-4687(+)	4279.0	4687.0	-		1.0408163265306123	4280-4672	4280	4672	38.0	no	0.0	0.0	0.0	C
PoFV_scaffold_21913_orf011	PoFV_scaffold_18363:3575-3991(+)	82.6	139	24	0	1	139	1	139	3.1820000000000002e-74	239	140	139	1.0	0.993	Cluster101	PoFV_scaffold_18363:3575-3991(+)	scaffold_18363	0.346588767433095	31.1832233741753	5305.0	32.0	scaffold_18363	102	32.0	33.96815107102593	0.0935738444193912	1			+	35	PoFV_scaffold_18363:3575-3991(+)	PoFV_scaffold_18363:3575-3991(+)	scaffold_18363_ORF.5;3274-3991(+)	3274.0	3991.0	-		1.7235576923076923	3575-3991	3575	3991	31.0	no	0.0	0.0	0.0	C
PoFV_scaffold_21913_orf011	PoFV_scaffold_32496:320-736(+)	93.2	139	9	0	1	139	1	139	2.723e-86	274	140	139	1.0	0.993	Cluster101	PoFV_scaffold_32496:320-736(+)	scaffold_32496	0.312314295146913	34.2354689564069	3028.0	35.0	scaffold_32496	140	35.0	33.96815107102593	0.1567080045095828	1			+	62	PoFV_scaffold_32496:320-736(+)	PoFV_scaffold_32496:320-736(+)	scaffold_32496_ORF.1;19-736(+)	19.0	736.0	-		1.7235576923076923	320-736	320	736	53.0	no	0.0	0.0	0.0	C
LbFV_YP_009345641.1	PoFV_scaffold_32496:320-736(+)	30.4	137	93	0	5	139	96	232	3.018e-14	66	232	139	0.971	0.591	Cluster101	PoFV_scaffold_32496:320-736(+)	scaffold_32496	0.312314295146913	34.2354689564069	3028.0	35.0	scaffold_32496	140	35.0	33.96815107102593	0.1567080045095828	1			+	62	PoFV_scaffold_32496:320-736(+)	PoFV_scaffold_32496:320-736(+)	scaffold_32496_ORF.1;19-736(+)	19.0	736.0	-		1.7235576923076923	320-736	320	736	53.0	no	0.0	0.0	0.0	C
PoFV_scaffold_7638_orf006	PoFV_scaffold_18363:5057-5305(+)	83.3	83	14	0	119	201	1	83	8.821e-39	145	318	83	1.0	0.261	Cluster297	PoFV_scaffold_18363:5057-5305(+)	scaffold_18363	0.346588767433095	31.1832233741753	5305.0	32.0	scaffold_18363	102	32.0	33.96815107102593	0.0935738444193912	1			+	37	PoFV_scaffold_18363:5057-5305(+)								5057-5305	5057	5305		no	0.0	0.0	0.0	C
DFV_QKN22505.1	PoFV_scaffold_8315:10320-9370(-)	36.3	268	168	0	5	272	8	271	3.575e-45	163	302	317	0.833	0.887	Cluster297	PoFV_scaffold_8315:10320-9370(-)	scaffold_8315	0.301560912533481	32.7433955292814	10826.0	32.0	scaffold_8315	130	32.0	33.96815107102593	0.0935738444193912	1			-	122	PoFV_scaffold_8315:10320-9370(-)	PoFV_scaffold_8315:10320-9370(-)	scaffold_8315_ORF.21;9369-10320(-)	9369.0	10320.0	-		1.0010526315789474	10320-9370	9370	10320	99.0	no	0.0	0.0	0.0	C
PoFV_scaffold_7638_orf006	PoFV_scaffold_8315:10320-9370(-)	87.3	317	40	0	1	317	1	317	1.049e-187	576	318	317	1.0	0.997	Cluster297	PoFV_scaffold_8315:10320-9370(-)	scaffold_8315	0.301560912533481	32.7433955292814	10826.0	32.0	scaffold_8315	130	32.0	33.96815107102593	0.0935738444193912	1			-	122	PoFV_scaffold_8315:10320-9370(-)	PoFV_scaffold_8315:10320-9370(-)	scaffold_8315_ORF.21;9369-10320(-)	9369.0	10320.0	-		1.0010526315789474	10320-9370	9370	10320	99.0	no	0.0	0.0	0.0	C
DFV_QKN22505.1	PoFV_scaffold_75772:601-2(-)	32.8	196	129	0	10	202	4	199	2.8280000000000003e-25	104	302	200	0.98	0.639	Cluster297	PoFV_scaffold_75772:601-2(-)	scaffold_75772	0.324388789505069	27.2303102625298	1676.0	28.0	scaffold_75772	302	28.0	33.96815107102593	0.0005636978579481	1			-	102	PoFV_scaffold_75772:601-2(-)								601-2	2	601		no	0.0	0.0	0.0	C
PoFV_scaffold_7638_orf006	PoFV_scaffold_75772:601-2(-)	80.4	201	39	0	1	201	1	200	1.254e-103	334	318	200	1.0	0.632	Cluster297	PoFV_scaffold_75772:601-2(-)	scaffold_75772	0.324388789505069	27.2303102625298	1676.0	28.0	scaffold_75772	302	28.0	33.96815107102593	0.0005636978579481	1			-	102	PoFV_scaffold_75772:601-2(-)								601-2	2	601		no	0.0	0.0	0.0	C
PoFV_scaffold_21913_orf010	PoFV_scaffold_18363:2914-3228(+)	53.7	105	48	0	1	105	1	105	6.755000000000002e-30	109	106	105	1.0	0.991	Cluster149	PoFV_scaffold_18363:2914-3228(+)	scaffold_18363	0.346588767433095	31.1832233741753	5305.0	32.0	scaffold_18363	102	32.0	33.96815107102593	0.0935738444193912	1			+	34	PoFV_scaffold_18363:2914-3228(+)	PoFV_scaffold_18363:2914-3228(+)	scaffold_18363_ORF.2;2913-3228(+)	2913.0	3228.0	-		1.0031847133757965	2914-3228	2914	3228	30.0	no	0.0	0.0	0.0	C
PoFV_scaffold_21913_orf010	PoFV_scaffold_19741:4917-5231(+)	82.7	105	18	0	1	105	1	105	6.763000000000001e-55	181	106	105	1.0	0.991	Cluster149	PoFV_scaffold_19741:4917-5231(+)	scaffold_19741	0.267485119047619	27.8394418604651	5375.0	26.0	scaffold_19741	102	26.0	33.96815107102593	0.0	1			+	45	PoFV_scaffold_19741:4917-5231(+)	PoFV_scaffold_19741:4917-5231(+)	scaffold_19741_ORF.6;4916-5231(+)	4916.0	5231.0	-		1.0031847133757965	4917-5231	4917	5231	39.0	no	0.0	0.0	0.0	C
LbFV_YP_009345624.1	PoFV_scaffold_18363:4071-5051(+)	21.0	297	225	0	35	320	30	326	1.54e-14	73	382	327	0.908	0.749	Cluster1	PoFV_scaffold_18363:4071-5051(+)	scaffold_18363	0.346588767433095	31.1832233741753	5305.0	32.0	scaffold_18363	102	32.0	33.96815107102593	0.0935738444193912	2	70.0	22.0	+	36	PoFV_scaffold_18363:4071-5051(+)	PoFV_scaffold_18363:4071-5051(+)	scaffold_18363_ORF.8;4064-4535(+)	4064.0	4535.0	-		0.4806122448979592	4071-5051	4071	5051	32.0	yes	0.0	0.0	0.0	C
LbFV_YP_009345624.1	PoFV_scaffold_18363:4071-5051(+)	21.0	297	225	0	35	320	30	326	1.54e-14	73	382	327	0.908	0.749	Cluster1	PoFV_scaffold_18363:4071-5051(+)	scaffold_18363	0.346588767433095	31.1832233741753	5305.0	32.0	scaffold_18363	102	32.0	33.96815107102593	0.0935738444193912	2	70.0	22.0	+	36	PoFV_scaffold_18363:4071-5051(+)	PoFV_scaffold_18363:4071-5051(+)	scaffold_18363_ORF.9;4610-5066(+)	4610.0	5066.0	-		0.4653061224489795	4071-5051	4071	5051	33.0	yes	0.0	0.0	0.0	C
PoFV_scaffold_21913_orf012	PoFV_scaffold_18363:4071-5051(+)	71.9	327	91	0	2	327	1	327	1.263e-150	475	412	327	1.0	0.791	Cluster1	PoFV_scaffold_18363:4071-5051(+)	scaffold_18363	0.346588767433095	31.1832233741753	5305.0	32.0	scaffold_18363	102	32.0	33.96815107102593	0.0935738444193912	2	70.0	22.0	+	36	PoFV_scaffold_18363:4071-5051(+)	PoFV_scaffold_18363:4071-5051(+)	scaffold_18363_ORF.8;4064-4535(+)	4064.0	4535.0	-		0.4806122448979592	4071-5051	4071	5051	32.0	yes	0.0	0.0	0.0	C
PoFV_scaffold_21913_orf012	PoFV_scaffold_18363:4071-5051(+)	71.9	327	91	0	2	327	1	327	1.263e-150	475	412	327	1.0	0.791	Cluster1	PoFV_scaffold_18363:4071-5051(+)	scaffold_18363	0.346588767433095	31.1832233741753	5305.0	32.0	scaffold_18363	102	32.0	33.96815107102593	0.0935738444193912	2	70.0	22.0	+	36	PoFV_scaffold_18363:4071-5051(+)	PoFV_scaffold_18363:4071-5051(+)	scaffold_18363_ORF.9;4610-5066(+)	4610.0	5066.0	-		0.4653061224489795	4071-5051	4071	5051	33.0	yes	0.0	0.0	0.0	C
PoFV_scaffold_21913_orf012	PoFV_scaffold_27772:877-3070(+)	72.1	274	76	0	1	273	1	274	1.024e-124	400	412	731	0.375	0.663	Cluster1	PoFV_scaffold_27772:877-3070(+)	scaffold_27772	0.311890287006928	31.4998585972851	7072.0	32.0	scaffold_27772	410	32.0	33.96815107102593	0.0935738444193912	3	26.0	23.0	+	52	PoFV_scaffold_27772:877-3070(+)	PoFV_scaffold_27772:877-3070(+)	scaffold_27772_ORF.1;801-1800(+)	801.0	1800.0	-		0.4555403556771545	877-3070	877	3070	43.0	yes	0.0	0.0	0.0	C
PoFV_scaffold_21913_orf012	PoFV_scaffold_27772:877-3070(+)	72.1	274	76	0	1	273	1	274	1.024e-124	400	412	731	0.375	0.663	Cluster1	PoFV_scaffold_27772:877-3070(+)	scaffold_27772	0.311890287006928	31.4998585972851	7072.0	32.0	scaffold_27772	410	32.0	33.96815107102593	0.0935738444193912	3	26.0	23.0	+	52	PoFV_scaffold_27772:877-3070(+)	PoFV_scaffold_27772:877-3070(+)	scaffold_27772_ORF.2;1860-2010(+)	1860.0	2010.0	-		0.0683994528043775	877-3070	877	3070	44.0	yes	0.0	0.0	0.0	C
DFV_QKN22497.1	PoFV_scaffold_32496:818-2053(+)	20.6	237	182	0	145	374	147	383	1.881e-09	57	399	412	0.575	0.576	Cluster1	PoFV_scaffold_32496:818-2053(+)	scaffold_32496	0.312314295146913	34.2354689564069	3028.0	35.0	scaffold_32496	140	35.0	33.96815107102593	0.1567080045095828	1			+	63	PoFV_scaffold_32496:818-2053(+)	PoFV_scaffold_32496:818-2053(+)	scaffold_32496_ORF.2;817-2053(+)	817.0	2053.0	-		1.0008097165991905	818-2053	818	2053	54.0	no	0.0	0.0	0.0	C
LbFV_YP_009345624.1	PoFV_scaffold_32496:818-2053(+)	23.1	234	178	0	94	325	99	332	1.507e-13	70	382	412	0.568	0.607	Cluster1	PoFV_scaffold_32496:818-2053(+)	scaffold_32496	0.312314295146913	34.2354689564069	3028.0	35.0	scaffold_32496	140	35.0	33.96815107102593	0.1567080045095828	1			+	63	PoFV_scaffold_32496:818-2053(+)	PoFV_scaffold_32496:818-2053(+)	scaffold_32496_ORF.2;817-2053(+)	817.0	2053.0	-		1.0008097165991905	818-2053	818	2053	54.0	no	0.0	0.0	0.0	C
PoFV_scaffold_21913_orf012	PoFV_scaffold_32496:818-2053(+)	94.8	412	21	0	1	411	1	412	8.811e-271	822	412	412	1.0	0.998	Cluster1	PoFV_scaffold_32496:818-2053(+)	scaffold_32496	0.312314295146913	34.2354689564069	3028.0	35.0	scaffold_32496	140	35.0	33.96815107102593	0.1567080045095828	1			+	63	PoFV_scaffold_32496:818-2053(+)	PoFV_scaffold_32496:818-2053(+)	scaffold_32496_ORF.2;817-2053(+)	817.0	2053.0	-		1.0008097165991905	818-2053	818	2053	54.0	no	0.0	0.0	0.0	C
PoFV_scaffold_21913_orf012	PoFV_scaffold_48333_0:100-681(+)	76.7	195	45	0	166	360	1	194	1.269e-92	306	412	194	1.0	0.473	Cluster1	PoFV_scaffold_48333_0:100-681(+)	scaffold_48333_0	0.323250296559905	33.2243323442137	1685.0	34.0	scaffold_48333_0	372	34.0	33.96815107102593	0.3534385569334836	1			+	83	PoFV_scaffold_48333_0:100-681(+)	PoFV_scaffold_48333_0:100-681(+)	scaffold_48333_0_ORF.1;141-711(+)	141.0	711.0	-		0.9810671256454389	100-681	100	681	72.0	no	0.0	0.0	0.0	C
LbFV_YP_009345624.1	PoFV_scaffold_48333_0:100-681(+)	25.2	171	126	0	1	170	160	330	1.087e-11	61	382	194	0.876	0.448	Cluster1	PoFV_scaffold_48333_0:100-681(+)	scaffold_48333_0	0.323250296559905	33.2243323442137	1685.0	34.0	scaffold_48333_0	372	34.0	33.96815107102593	0.3534385569334836	1			+	83	PoFV_scaffold_48333_0:100-681(+)	PoFV_scaffold_48333_0:100-681(+)	scaffold_48333_0_ORF.1;141-711(+)	141.0	711.0	-		0.9810671256454389	100-681	100	681	72.0	no	0.0	0.0	0.0	C
PoFV_scaffold_21913_orf007	PoFV_scaffold_18363:1926-2225(+)	81.4	101	18	0	1	101	1	100	1.511e-51	171	102	100	1.0	0.99	Cluster1183	PoFV_scaffold_18363:1926-2225(+)	scaffold_18363	0.346588767433095	31.1832233741753	5305.0	32.0	scaffold_18363	102	32.0	33.96815107102593	0.0935738444193912	1			+	32	PoFV_scaffold_18363:1926-2225(+)	PoFV_scaffold_18363:1926-2225(+)	scaffold_18363_ORF.6;1802-2225(+)	1802.0	2225.0	-		1.414715719063545	1926-2225	1926	2225	28.0	no	0.0	0.0	0.0	C
PoFV_scaffold_21913_orf007	PoFV_scaffold_19741:3849-4154(+)	85.6	102	14	0	1	101	1	102	1.147e-55	183	102	102	1.0	0.99	Cluster1183	PoFV_scaffold_19741:3849-4154(+)	scaffold_19741	0.267485119047619	27.8394418604651	5375.0	26.0	scaffold_19741	102	26.0	33.96815107102593	0.0	1			+	43	PoFV_scaffold_19741:3849-4154(+)	PoFV_scaffold_19741:3849-4154(+)	scaffold_19741_ORF.5;3848-4154(+)	3848.0	4154.0	-		1.00327868852459	3849-4154	3849	4154	37.0	no	0.0	0.0	0.0	C
Q9YMH8_LdMNPV	PoFV_scaffold_17380:4675-4082(-)	29.0	172	120	0	6	175	6	177	1.739e-16	76	244	198	0.869	0.697	Cluster56	PoFV_scaffold_17380:4675-4082(-)	scaffold_17380	0.297796093889984	32.5161290322581	5580.0	33.0	scaffold_17380	156	33.0	33.96815107102593	0.2068771138669673	2			-	29	PoFV_scaffold_17380:4675-4082(-)	PoFV_scaffold_17380:4675-4082(-)	scaffold_17380_ORF.11;3952-4681(-)	3952.0	4681.0	-		1.2293423271500843	4675-4082	4082	4675	25.0	no	0.0	0.0	0.0	C
Q9YMH8_LdMNPV	PoFV_scaffold_17380:4675-4082(-)	29.0	172	120	0	6	175	6	177	1.739e-16	76	244	198	0.869	0.697	Cluster56	PoFV_scaffold_17380:4675-4082(-)	scaffold_17380	0.297796093889984	32.5161290322581	5580.0	33.0	scaffold_17380	156	33.0	33.96815107102593	0.2068771138669673	2			-	29	PoFV_scaffold_17380:4675-4082(-)	PoFV_scaffold_17380:4675-4082(-)	scaffold_17380_ORF.7;3096-3879(-)	3096.0	3879.0	-			4675-4082	4082	4675	24.0	no	0.0	0.0	0.0	C
Q9YMI2_LdMNPV	PoFV_scaffold_17380:4675-4082(-)	44.6	116	61	0	6	117	6	121	5.428999999999999e-22	96	354	198	0.586	0.316	Cluster56	PoFV_scaffold_17380:4675-4082(-)	scaffold_17380	0.297796093889984	32.5161290322581	5580.0	33.0	scaffold_17380	156	33.0	33.96815107102593	0.2068771138669673	2			-	29	PoFV_scaffold_17380:4675-4082(-)	PoFV_scaffold_17380:4675-4082(-)	scaffold_17380_ORF.11;3952-4681(-)	3952.0	4681.0	-		1.2293423271500843	4675-4082	4082	4675	25.0	no	0.0	0.0	0.0	C
Q9YMI2_LdMNPV	PoFV_scaffold_17380:4675-4082(-)	44.6	116	61	0	6	117	6	121	5.428999999999999e-22	96	354	198	0.586	0.316	Cluster56	PoFV_scaffold_17380:4675-4082(-)	scaffold_17380	0.297796093889984	32.5161290322581	5580.0	33.0	scaffold_17380	156	33.0	33.96815107102593	0.2068771138669673	2			-	29	PoFV_scaffold_17380:4675-4082(-)	PoFV_scaffold_17380:4675-4082(-)	scaffold_17380_ORF.7;3096-3879(-)	3096.0	3879.0	-			4675-4082	4082	4675	24.0	no	0.0	0.0	0.0	C
PoFV_scaffold_18896_orf004	PoFV_scaffold_17380:4675-4082(-)	34.8	95	60	0	3	97	1	93	2.609e-11	57	126	198	0.47	0.754	Cluster56	PoFV_scaffold_17380:4675-4082(-)	scaffold_17380	0.297796093889984	32.5161290322581	5580.0	33.0	scaffold_17380	156	33.0	33.96815107102593	0.2068771138669673	2			-	29	PoFV_scaffold_17380:4675-4082(-)	PoFV_scaffold_17380:4675-4082(-)	scaffold_17380_ORF.11;3952-4681(-)	3952.0	4681.0	-		1.2293423271500843	4675-4082	4082	4675	25.0	no	0.0	0.0	0.0	C
PoFV_scaffold_18896_orf004	PoFV_scaffold_17380:4675-4082(-)	34.8	95	60	0	3	97	1	93	2.609e-11	57	126	198	0.47	0.754	Cluster56	PoFV_scaffold_17380:4675-4082(-)	scaffold_17380	0.297796093889984	32.5161290322581	5580.0	33.0	scaffold_17380	156	33.0	33.96815107102593	0.2068771138669673	2			-	29	PoFV_scaffold_17380:4675-4082(-)	PoFV_scaffold_17380:4675-4082(-)	scaffold_17380_ORF.7;3096-3879(-)	3096.0	3879.0	-			4675-4082	4082	4675	24.0	no	0.0	0.0	0.0	C
Q9YMH4_LdMNPV	PoFV_scaffold_17380:4675-4082(-)	34.7	148	94	0	6	150	6	153	5.028e-19	86	337	198	0.747	0.43	Cluster56	PoFV_scaffold_17380:4675-4082(-)	scaffold_17380	0.297796093889984	32.5161290322581	5580.0	33.0	scaffold_17380	156	33.0	33.96815107102593	0.2068771138669673	2			-	29	PoFV_scaffold_17380:4675-4082(-)	PoFV_scaffold_17380:4675-4082(-)	scaffold_17380_ORF.11;3952-4681(-)	3952.0	4681.0	-		1.2293423271500843	4675-4082	4082	4675	25.0	no	0.0	0.0	0.0	C
Q9YMH4_LdMNPV	PoFV_scaffold_17380:4675-4082(-)	34.7	148	94	0	6	150	6	153	5.028e-19	86	337	198	0.747	0.43	Cluster56	PoFV_scaffold_17380:4675-4082(-)	scaffold_17380	0.297796093889984	32.5161290322581	5580.0	33.0	scaffold_17380	156	33.0	33.96815107102593	0.2068771138669673	2			-	29	PoFV_scaffold_17380:4675-4082(-)	PoFV_scaffold_17380:4675-4082(-)	scaffold_17380_ORF.7;3096-3879(-)	3096.0	3879.0	-			4675-4082	4082	4675	24.0	no	0.0	0.0	0.0	C
Q9YMU2_LdMNPV	PoFV_scaffold_17380:4675-4082(-)	38.9	116	64	0	6	111	6	121	6.466e-17	80	351	198	0.586	0.302	Cluster56	PoFV_scaffold_17380:4675-4082(-)	scaffold_17380	0.297796093889984	32.5161290322581	5580.0	33.0	scaffold_17380	156	33.0	33.96815107102593	0.2068771138669673	2			-	29	PoFV_scaffold_17380:4675-4082(-)	PoFV_scaffold_17380:4675-4082(-)	scaffold_17380_ORF.11;3952-4681(-)	3952.0	4681.0	-		1.2293423271500843	4675-4082	4082	4675	25.0	no	0.0	0.0	0.0	C
Q9YMU2_LdMNPV	PoFV_scaffold_17380:4675-4082(-)	38.9	116	64	0	6	111	6	121	6.466e-17	80	351	198	0.586	0.302	Cluster56	PoFV_scaffold_17380:4675-4082(-)	scaffold_17380	0.297796093889984	32.5161290322581	5580.0	33.0	scaffold_17380	156	33.0	33.96815107102593	0.2068771138669673	2			-	29	PoFV_scaffold_17380:4675-4082(-)	PoFV_scaffold_17380:4675-4082(-)	scaffold_17380_ORF.7;3096-3879(-)	3096.0	3879.0	-			4675-4082	4082	4675	24.0	no	0.0	0.0	0.0	C
AKY03179_AmFV	PoFV_scaffold_17380:4675-4082(-)	30.2	133	85	0	121	243	1	133	1.833e-11	64	499	198	0.672	0.246	Cluster56	PoFV_scaffold_17380:4675-4082(-)	scaffold_17380	0.297796093889984	32.5161290322581	5580.0	33.0	scaffold_17380	156	33.0	33.96815107102593	0.2068771138669673	2			-	29	PoFV_scaffold_17380:4675-4082(-)	PoFV_scaffold_17380:4675-4082(-)	scaffold_17380_ORF.11;3952-4681(-)	3952.0	4681.0	-		1.2293423271500843	4675-4082	4082	4675	25.0	no	0.0	0.0	0.0	C
AKY03179_AmFV	PoFV_scaffold_17380:4675-4082(-)	30.2	133	85	0	121	243	1	133	1.833e-11	64	499	198	0.672	0.246	Cluster56	PoFV_scaffold_17380:4675-4082(-)	scaffold_17380	0.297796093889984	32.5161290322581	5580.0	33.0	scaffold_17380	156	33.0	33.96815107102593	0.2068771138669673	2			-	29	PoFV_scaffold_17380:4675-4082(-)	PoFV_scaffold_17380:4675-4082(-)	scaffold_17380_ORF.7;3096-3879(-)	3096.0	3879.0	-			4675-4082	4082	4675	24.0	no	0.0	0.0	0.0	C
LbFV_YP_009345618.1	PoFV_scaffold_17380:4675-4082(-)	26.0	198	132	0	86	265	1	198	4.884e-15	73	299	198	1.0	0.602	Cluster56	PoFV_scaffold_17380:4675-4082(-)	scaffold_17380	0.297796093889984	32.5161290322581	5580.0	33.0	scaffold_17380	156	33.0	33.96815107102593	0.2068771138669673	2			-	29	PoFV_scaffold_17380:4675-4082(-)	PoFV_scaffold_17380:4675-4082(-)	scaffold_17380_ORF.11;3952-4681(-)	3952.0	4681.0	-		1.2293423271500843	4675-4082	4082	4675	25.0	no	0.0	0.0	0.0	C
LbFV_YP_009345618.1	PoFV_scaffold_17380:4675-4082(-)	26.0	198	132	0	86	265	1	198	4.884e-15	73	299	198	1.0	0.602	Cluster56	PoFV_scaffold_17380:4675-4082(-)	scaffold_17380	0.297796093889984	32.5161290322581	5580.0	33.0	scaffold_17380	156	33.0	33.96815107102593	0.2068771138669673	2			-	29	PoFV_scaffold_17380:4675-4082(-)	PoFV_scaffold_17380:4675-4082(-)	scaffold_17380_ORF.7;3096-3879(-)	3096.0	3879.0	-			4675-4082	4082	4675	24.0	no	0.0	0.0	0.0	C
Q9YMQ3_LdMNPV	PoFV_scaffold_17380:4675-4082(-)	33.3	93	58	0	100	187	3	95	4.993e-09	53	130	198	0.444	0.715	Cluster56	PoFV_scaffold_17380:4675-4082(-)	scaffold_17380	0.297796093889984	32.5161290322581	5580.0	33.0	scaffold_17380	156	33.0	33.96815107102593	0.2068771138669673	2			-	29	PoFV_scaffold_17380:4675-4082(-)	PoFV_scaffold_17380:4675-4082(-)	scaffold_17380_ORF.11;3952-4681(-)	3952.0	4681.0	-		1.2293423271500843	4675-4082	4082	4675	25.0	no	0.0	0.0	0.0	C
Q9YMQ3_LdMNPV	PoFV_scaffold_17380:4675-4082(-)	33.3	93	58	0	100	187	3	95	4.993e-09	53	130	198	0.444	0.715	Cluster56	PoFV_scaffold_17380:4675-4082(-)	scaffold_17380	0.297796093889984	32.5161290322581	5580.0	33.0	scaffold_17380	156	33.0	33.96815107102593	0.2068771138669673	2			-	29	PoFV_scaffold_17380:4675-4082(-)	PoFV_scaffold_17380:4675-4082(-)	scaffold_17380_ORF.7;3096-3879(-)	3096.0	3879.0	-			4675-4082	4082	4675	24.0	no	0.0	0.0	0.0	C
Q9YMH8_LdMNPV	PoFV_scaffold_17380:3873-3103(-)	35.8	108	64	0	6	105	6	113	2.374e-13	67	244	257	0.42	0.41	Cluster56	PoFV_scaffold_17380:3873-3103(-)	scaffold_17380	0.297796093889984	32.5161290322581	5580.0	33.0	scaffold_17380	156	33.0	33.96815107102593	0.2068771138669673	2			-	28	PoFV_scaffold_17380:3873-3103(-)	PoFV_scaffold_17380:3873-3103(-)	scaffold_17380_ORF.7;3096-3879(-)	3096.0	3879.0	-		1.016883116883117	3873-3103	3103	3873	24.0	no	0.0	0.0	0.0	C
Q9YMH8_LdMNPV	PoFV_scaffold_17380:3873-3103(-)	35.8	108	64	0	6	105	6	113	2.374e-13	67	244	257	0.42	0.41	Cluster56	PoFV_scaffold_17380:3873-3103(-)	scaffold_17380	0.297796093889984	32.5161290322581	5580.0	33.0	scaffold_17380	156	33.0	33.96815107102593	0.2068771138669673	2			-	28	PoFV_scaffold_17380:3873-3103(-)	PoFV_scaffold_17380:3873-3103(-)	scaffold_17380_ORF.11;3952-4681(-)	3952.0	4681.0	-			3873-3103	3103	3873	25.0	no	0.0	0.0	0.0	C
AKY03175_AmFV	PoFV_scaffold_17380:3873-3103(-)	26.9	148	107	0	120	267	1	148	8.086e-10	59	663	257	0.576	0.223	Cluster56	PoFV_scaffold_17380:3873-3103(-)	scaffold_17380	0.297796093889984	32.5161290322581	5580.0	33.0	scaffold_17380	156	33.0	33.96815107102593	0.2068771138669673	2			-	28	PoFV_scaffold_17380:3873-3103(-)	PoFV_scaffold_17380:3873-3103(-)	scaffold_17380_ORF.7;3096-3879(-)	3096.0	3879.0	-		1.016883116883117	3873-3103	3103	3873	24.0	no	0.0	0.0	0.0	C
AKY03175_AmFV	PoFV_scaffold_17380:3873-3103(-)	26.9	148	107	0	120	267	1	148	8.086e-10	59	663	257	0.576	0.223	Cluster56	PoFV_scaffold_17380:3873-3103(-)	scaffold_17380	0.297796093889984	32.5161290322581	5580.0	33.0	scaffold_17380	156	33.0	33.96815107102593	0.2068771138669673	2			-	28	PoFV_scaffold_17380:3873-3103(-)	PoFV_scaffold_17380:3873-3103(-)	scaffold_17380_ORF.11;3952-4681(-)	3952.0	4681.0	-			3873-3103	3103	3873	25.0	no	0.0	0.0	0.0	C
Q9YMI2_LdMNPV	PoFV_scaffold_17380:3873-3103(-)	30.4	286	172	0	6	291	6	253	1.6330000000000002e-34	134	354	257	0.965	0.808	Cluster56	PoFV_scaffold_17380:3873-3103(-)	scaffold_17380	0.297796093889984	32.5161290322581	5580.0	33.0	scaffold_17380	156	33.0	33.96815107102593	0.2068771138669673	2			-	28	PoFV_scaffold_17380:3873-3103(-)	PoFV_scaffold_17380:3873-3103(-)	scaffold_17380_ORF.7;3096-3879(-)	3096.0	3879.0	-		1.016883116883117	3873-3103	3103	3873	24.0	no	0.0	0.0	0.0	C
Q9YMI2_LdMNPV	PoFV_scaffold_17380:3873-3103(-)	30.4	286	172	0	6	291	6	253	1.6330000000000002e-34	134	354	257	0.965	0.808	Cluster56	PoFV_scaffold_17380:3873-3103(-)	scaffold_17380	0.297796093889984	32.5161290322581	5580.0	33.0	scaffold_17380	156	33.0	33.96815107102593	0.2068771138669673	2			-	28	PoFV_scaffold_17380:3873-3103(-)	PoFV_scaffold_17380:3873-3103(-)	scaffold_17380_ORF.11;3952-4681(-)	3952.0	4681.0	-			3873-3103	3103	3873	25.0	no	0.0	0.0	0.0	C
Q9YMH4_LdMNPV	PoFV_scaffold_17380:3873-3103(-)	33.2	269	165	0	6	274	6	253	2.771e-38	144	337	257	0.965	0.798	Cluster56	PoFV_scaffold_17380:3873-3103(-)	scaffold_17380	0.297796093889984	32.5161290322581	5580.0	33.0	scaffold_17380	156	33.0	33.96815107102593	0.2068771138669673	2			-	28	PoFV_scaffold_17380:3873-3103(-)	PoFV_scaffold_17380:3873-3103(-)	scaffold_17380_ORF.7;3096-3879(-)	3096.0	3879.0	-		1.016883116883117	3873-3103	3103	3873	24.0	no	0.0	0.0	0.0	C
Q9YMH4_LdMNPV	PoFV_scaffold_17380:3873-3103(-)	33.2	269	165	0	6	274	6	253	2.771e-38	144	337	257	0.965	0.798	Cluster56	PoFV_scaffold_17380:3873-3103(-)	scaffold_17380	0.297796093889984	32.5161290322581	5580.0	33.0	scaffold_17380	156	33.0	33.96815107102593	0.2068771138669673	2			-	28	PoFV_scaffold_17380:3873-3103(-)	PoFV_scaffold_17380:3873-3103(-)	scaffold_17380_ORF.11;3952-4681(-)	3952.0	4681.0	-			3873-3103	3103	3873	25.0	no	0.0	0.0	0.0	C
Q9YMU2_LdMNPV	PoFV_scaffold_17380:3873-3103(-)	29.3	280	175	0	6	285	6	253	2.22e-31	124	351	257	0.965	0.798	Cluster56	PoFV_scaffold_17380:3873-3103(-)	scaffold_17380	0.297796093889984	32.5161290322581	5580.0	33.0	scaffold_17380	156	33.0	33.96815107102593	0.2068771138669673	2			-	28	PoFV_scaffold_17380:3873-3103(-)	PoFV_scaffold_17380:3873-3103(-)	scaffold_17380_ORF.7;3096-3879(-)	3096.0	3879.0	-		1.016883116883117	3873-3103	3103	3873	24.0	no	0.0	0.0	0.0	C
Q9YMU2_LdMNPV	PoFV_scaffold_17380:3873-3103(-)	29.3	280	175	0	6	285	6	253	2.22e-31	124	351	257	0.965	0.798	Cluster56	PoFV_scaffold_17380:3873-3103(-)	scaffold_17380	0.297796093889984	32.5161290322581	5580.0	33.0	scaffold_17380	156	33.0	33.96815107102593	0.2068771138669673	2			-	28	PoFV_scaffold_17380:3873-3103(-)	PoFV_scaffold_17380:3873-3103(-)	scaffold_17380_ORF.11;3952-4681(-)	3952.0	4681.0	-			3873-3103	3103	3873	25.0	no	0.0	0.0	0.0	C
AKY03179_AmFV	PoFV_scaffold_17380:3873-3103(-)	29.1	144	100	0	121	262	1	144	7.93e-12	65	499	257	0.56	0.285	Cluster56	PoFV_scaffold_17380:3873-3103(-)	scaffold_17380	0.297796093889984	32.5161290322581	5580.0	33.0	scaffold_17380	156	33.0	33.96815107102593	0.2068771138669673	2			-	28	PoFV_scaffold_17380:3873-3103(-)	PoFV_scaffold_17380:3873-3103(-)	scaffold_17380_ORF.7;3096-3879(-)	3096.0	3879.0	-		1.016883116883117	3873-3103	3103	3873	24.0	no	0.0	0.0	0.0	C
AKY03179_AmFV	PoFV_scaffold_17380:3873-3103(-)	29.1	144	100	0	121	262	1	144	7.93e-12	65	499	257	0.56	0.285	Cluster56	PoFV_scaffold_17380:3873-3103(-)	scaffold_17380	0.297796093889984	32.5161290322581	5580.0	33.0	scaffold_17380	156	33.0	33.96815107102593	0.2068771138669673	2			-	28	PoFV_scaffold_17380:3873-3103(-)	PoFV_scaffold_17380:3873-3103(-)	scaffold_17380_ORF.11;3952-4681(-)	3952.0	4681.0	-			3873-3103	3103	3873	25.0	no	0.0	0.0	0.0	C
DFV_QKN22484.1	PoFV_scaffold_17380:3873-3103(-)	22.5	220	153	0	31	250	26	224	1.675e-11	63	326	257	0.774	0.675	Cluster56	PoFV_scaffold_17380:3873-3103(-)	scaffold_17380	0.297796093889984	32.5161290322581	5580.0	33.0	scaffold_17380	156	33.0	33.96815107102593	0.2068771138669673	2			-	28	PoFV_scaffold_17380:3873-3103(-)	PoFV_scaffold_17380:3873-3103(-)	scaffold_17380_ORF.7;3096-3879(-)	3096.0	3879.0	-		1.016883116883117	3873-3103	3103	3873	24.0	no	0.0	0.0	0.0	C
DFV_QKN22484.1	PoFV_scaffold_17380:3873-3103(-)	22.5	220	153	0	31	250	26	224	1.675e-11	63	326	257	0.774	0.675	Cluster56	PoFV_scaffold_17380:3873-3103(-)	scaffold_17380	0.297796093889984	32.5161290322581	5580.0	33.0	scaffold_17380	156	33.0	33.96815107102593	0.2068771138669673	2			-	28	PoFV_scaffold_17380:3873-3103(-)	PoFV_scaffold_17380:3873-3103(-)	scaffold_17380_ORF.11;3952-4681(-)	3952.0	4681.0	-			3873-3103	3103	3873	25.0	no	0.0	0.0	0.0	C
PoFV_scaffold_18896_orf003	PoFV_scaffold_17380:3873-3103(-)	59.6	57	22	0	1	56	101	157	3.592e-13	69	432	257	0.222	0.13	Cluster56	PoFV_scaffold_17380:3873-3103(-)	scaffold_17380	0.297796093889984	32.5161290322581	5580.0	33.0	scaffold_17380	156	33.0	33.96815107102593	0.2068771138669673	2			-	28	PoFV_scaffold_17380:3873-3103(-)	PoFV_scaffold_17380:3873-3103(-)	scaffold_17380_ORF.7;3096-3879(-)	3096.0	3879.0	-		1.016883116883117	3873-3103	3103	3873	24.0	no	0.0	0.0	0.0	C
PoFV_scaffold_18896_orf003	PoFV_scaffold_17380:3873-3103(-)	59.6	57	22	0	1	56	101	157	3.592e-13	69	432	257	0.222	0.13	Cluster56	PoFV_scaffold_17380:3873-3103(-)	scaffold_17380	0.297796093889984	32.5161290322581	5580.0	33.0	scaffold_17380	156	33.0	33.96815107102593	0.2068771138669673	2			-	28	PoFV_scaffold_17380:3873-3103(-)	PoFV_scaffold_17380:3873-3103(-)	scaffold_17380_ORF.11;3952-4681(-)	3952.0	4681.0	-			3873-3103	3103	3873	25.0	no	0.0	0.0	0.0	C
LbFV_YP_009345618.1	PoFV_scaffold_17380:3873-3103(-)	22.8	257	131	0	86	256	1	257	2.02e-15	74	299	257	1.0	0.572	Cluster56	PoFV_scaffold_17380:3873-3103(-)	scaffold_17380	0.297796093889984	32.5161290322581	5580.0	33.0	scaffold_17380	156	33.0	33.96815107102593	0.2068771138669673	2			-	28	PoFV_scaffold_17380:3873-3103(-)	PoFV_scaffold_17380:3873-3103(-)	scaffold_17380_ORF.7;3096-3879(-)	3096.0	3879.0	-		1.016883116883117	3873-3103	3103	3873	24.0	no	0.0	0.0	0.0	C
LbFV_YP_009345618.1	PoFV_scaffold_17380:3873-3103(-)	22.8	257	131	0	86	256	1	257	2.02e-15	74	299	257	1.0	0.572	Cluster56	PoFV_scaffold_17380:3873-3103(-)	scaffold_17380	0.297796093889984	32.5161290322581	5580.0	33.0	scaffold_17380	156	33.0	33.96815107102593	0.2068771138669673	2			-	28	PoFV_scaffold_17380:3873-3103(-)	PoFV_scaffold_17380:3873-3103(-)	scaffold_17380_ORF.11;3952-4681(-)	3952.0	4681.0	-			3873-3103	3103	3873	25.0	no	0.0	0.0	0.0	C
PoFV_scaffold_18896_orf004	PoFV_scaffold_17380:3873-3103(-)	33.2	95	60	0	1	91	3	97	6.545e-09	53	126	257	0.354	0.754	Cluster56	PoFV_scaffold_17380:3873-3103(-)	scaffold_17380	0.297796093889984	32.5161290322581	5580.0	33.0	scaffold_17380	156	33.0	33.96815107102593	0.2068771138669673	2			-	28	PoFV_scaffold_17380:3873-3103(-)	PoFV_scaffold_17380:3873-3103(-)	scaffold_17380_ORF.7;3096-3879(-)	3096.0	3879.0	-		1.016883116883117	3873-3103	3103	3873	24.0	no	0.0	0.0	0.0	C
PoFV_scaffold_18896_orf004	PoFV_scaffold_17380:3873-3103(-)	33.2	95	60	0	1	91	3	97	6.545e-09	53	126	257	0.354	0.754	Cluster56	PoFV_scaffold_17380:3873-3103(-)	scaffold_17380	0.297796093889984	32.5161290322581	5580.0	33.0	scaffold_17380	156	33.0	33.96815107102593	0.2068771138669673	2			-	28	PoFV_scaffold_17380:3873-3103(-)	PoFV_scaffold_17380:3873-3103(-)	scaffold_17380_ORF.11;3952-4681(-)	3952.0	4681.0	-			3873-3103	3103	3873	25.0	no	0.0	0.0	0.0	C
Q9YMQ5_LdMNPV	PoFV_scaffold_33352:2402-1155(-)	27.8	119	79	0	345	455	239	357	1.882e-07	51	511	416	0.286	0.217	Cluster56	PoFV_scaffold_33352:2402-1155(-)	scaffold_33352	0.301872372946122	31.0940187273075	5233.0	32.0	scaffold_33352	213	32.0	33.96815107102593	0.0935738444193912	2	19.0	12.0	-	65	PoFV_scaffold_33352:2402-1155(-)	PoFV_scaffold_33352:2402-1155(-)	scaffold_33352_ORF.10;1439-2402(-)	1439.0	2402.0	-		0.7722534081796311	2402-1155	1155	2402	57.0	yes	0.0	0.0	0.0	C
Q9YMQ5_LdMNPV	PoFV_scaffold_33352:2402-1155(-)	27.8	119	79	0	345	455	239	357	1.882e-07	51	511	416	0.286	0.217	Cluster56	PoFV_scaffold_33352:2402-1155(-)	scaffold_33352	0.301872372946122	31.0940187273075	5233.0	32.0	scaffold_33352	213	32.0	33.96815107102593	0.0935738444193912	2	19.0	12.0	-	65	PoFV_scaffold_33352:2402-1155(-)	PoFV_scaffold_33352:2402-1155(-)	scaffold_33352_ORF.11;1148-1343(-)	1148.0	1343.0	-		0.1563753007217321	2402-1155	1155	2402	56.0	yes	0.0	0.0	0.0	C
Q9YMI2_LdMNPV	PoFV_scaffold_33352:2402-1155(-)	32.6	103	63	0	99	193	1	103	1.959e-09	56	354	416	0.248	0.268	Cluster56	PoFV_scaffold_33352:2402-1155(-)	scaffold_33352	0.301872372946122	31.0940187273075	5233.0	32.0	scaffold_33352	213	32.0	33.96815107102593	0.0935738444193912	2	19.0	12.0	-	65	PoFV_scaffold_33352:2402-1155(-)	PoFV_scaffold_33352:2402-1155(-)	scaffold_33352_ORF.10;1439-2402(-)	1439.0	2402.0	-		0.7722534081796311	2402-1155	1155	2402	57.0	yes	0.0	0.0	0.0	C
Q9YMI2_LdMNPV	PoFV_scaffold_33352:2402-1155(-)	32.6	103	63	0	99	193	1	103	1.959e-09	56	354	416	0.248	0.268	Cluster56	PoFV_scaffold_33352:2402-1155(-)	scaffold_33352	0.301872372946122	31.0940187273075	5233.0	32.0	scaffold_33352	213	32.0	33.96815107102593	0.0935738444193912	2	19.0	12.0	-	65	PoFV_scaffold_33352:2402-1155(-)	PoFV_scaffold_33352:2402-1155(-)	scaffold_33352_ORF.11;1148-1343(-)	1148.0	1343.0	-		0.1563753007217321	2402-1155	1155	2402	56.0	yes	0.0	0.0	0.0	C
Q9YMH4_LdMNPV	PoFV_scaffold_33352:2402-1155(-)	49.8	54	27	0	103	156	1	54	1.703e-08	53	337	416	0.13	0.16	Cluster56	PoFV_scaffold_33352:2402-1155(-)	scaffold_33352	0.301872372946122	31.0940187273075	5233.0	32.0	scaffold_33352	213	32.0	33.96815107102593	0.0935738444193912	2	19.0	12.0	-	65	PoFV_scaffold_33352:2402-1155(-)	PoFV_scaffold_33352:2402-1155(-)	scaffold_33352_ORF.10;1439-2402(-)	1439.0	2402.0	-		0.7722534081796311	2402-1155	1155	2402	57.0	yes	0.0	0.0	0.0	C
Q9YMH4_LdMNPV	PoFV_scaffold_33352:2402-1155(-)	49.8	54	27	0	103	156	1	54	1.703e-08	53	337	416	0.13	0.16	Cluster56	PoFV_scaffold_33352:2402-1155(-)	scaffold_33352	0.301872372946122	31.0940187273075	5233.0	32.0	scaffold_33352	213	32.0	33.96815107102593	0.0935738444193912	2	19.0	12.0	-	65	PoFV_scaffold_33352:2402-1155(-)	PoFV_scaffold_33352:2402-1155(-)	scaffold_33352_ORF.11;1148-1343(-)	1148.0	1343.0	-		0.1563753007217321	2402-1155	1155	2402	56.0	yes	0.0	0.0	0.0	C
Q9YMU2_LdMNPV	PoFV_scaffold_33352:2402-1155(-)	51.0	54	26	0	93	146	1	54	5.97e-09	55	351	416	0.13	0.154	Cluster56	PoFV_scaffold_33352:2402-1155(-)	scaffold_33352	0.301872372946122	31.0940187273075	5233.0	32.0	scaffold_33352	213	32.0	33.96815107102593	0.0935738444193912	2	19.0	12.0	-	65	PoFV_scaffold_33352:2402-1155(-)	PoFV_scaffold_33352:2402-1155(-)	scaffold_33352_ORF.10;1439-2402(-)	1439.0	2402.0	-		0.7722534081796311	2402-1155	1155	2402	57.0	yes	0.0	0.0	0.0	C
Q9YMU2_LdMNPV	PoFV_scaffold_33352:2402-1155(-)	51.0	54	26	0	93	146	1	54	5.97e-09	55	351	416	0.13	0.154	Cluster56	PoFV_scaffold_33352:2402-1155(-)	scaffold_33352	0.301872372946122	31.0940187273075	5233.0	32.0	scaffold_33352	213	32.0	33.96815107102593	0.0935738444193912	2	19.0	12.0	-	65	PoFV_scaffold_33352:2402-1155(-)	PoFV_scaffold_33352:2402-1155(-)	scaffold_33352_ORF.11;1148-1343(-)	1148.0	1343.0	-		0.1563753007217321	2402-1155	1155	2402	56.0	yes	0.0	0.0	0.0	C
PoFV_scaffold_18896_orf003	PoFV_scaffold_33352:2402-1155(-)	83.0	428	71	0	1	428	1	416	9.693e-240	733	432	416	1.0	0.991	Cluster56	PoFV_scaffold_33352:2402-1155(-)	scaffold_33352	0.301872372946122	31.0940187273075	5233.0	32.0	scaffold_33352	213	32.0	33.96815107102593	0.0935738444193912	2	19.0	12.0	-	65	PoFV_scaffold_33352:2402-1155(-)	PoFV_scaffold_33352:2402-1155(-)	scaffold_33352_ORF.10;1439-2402(-)	1439.0	2402.0	-		0.7722534081796311	2402-1155	1155	2402	57.0	yes	0.0	0.0	0.0	C
PoFV_scaffold_18896_orf003	PoFV_scaffold_33352:2402-1155(-)	83.0	428	71	0	1	428	1	416	9.693e-240	733	432	416	1.0	0.991	Cluster56	PoFV_scaffold_33352:2402-1155(-)	scaffold_33352	0.301872372946122	31.0940187273075	5233.0	32.0	scaffold_33352	213	32.0	33.96815107102593	0.0935738444193912	2	19.0	12.0	-	65	PoFV_scaffold_33352:2402-1155(-)	PoFV_scaffold_33352:2402-1155(-)	scaffold_33352_ORF.11;1148-1343(-)	1148.0	1343.0	-		0.1563753007217321	2402-1155	1155	2402	56.0	yes	0.0	0.0	0.0	C
PoFV_scaffold_18896_orf004	PoFV_scaffold_33352:2792-2490(-)	71.4	102	29	0	1	102	1	101	3.123e-43	149	126	101	1.0	0.81	Cluster56	PoFV_scaffold_33352:2792-2490(-)	scaffold_33352	0.301872372946122	31.0940187273075	5233.0	32.0	scaffold_33352	213	32.0	33.96815107102593	0.0935738444193912	1			-	66	PoFV_scaffold_33352:2792-2490(-)	PoFV_scaffold_33352:2792-2490(-)	scaffold_33352_ORF.9;2471-2792(-)	2471.0	2792.0	-		1.0629139072847682	2792-2490	2490	2792	58.0	no	0.0	0.0	0.0	C
PoFV_scaffold_7638_orf011	PoFV_scaffold_8315:5779-6069(+)	90.4	97	9	0	8	104	1	97	2.73e-56	185	105	97	1.0	0.924	Cluster56	PoFV_scaffold_8315:5779-6069(+)	scaffold_8315	0.301560912533481	32.7433955292814	10826.0	32.0	scaffold_8315	130	32.0	33.96815107102593	0.0935738444193912	1			+	117	PoFV_scaffold_8315:5779-6069(+)	PoFV_scaffold_8315:5779-6069(+)	scaffold_8315_ORF.3;5283-6069(+)	5283.0	6069.0	-		2.7103448275862068	5779-6069	5779	6069	94.0	no	0.0	0.0	0.0	C
Q9YMI2_LdMNPV	PoFV_scaffold_3866:3124-2846(-)	41.2	87	49	0	5	89	7	93	2.126e-12	66	354	93	0.935	0.24	Cluster56	PoFV_scaffold_3866:3124-2846(-)	scaffold_3866	0.382792130836691	36.1767801270503	21094.0	36.0	scaffold_3866	728	36.0	33.96815107102593	0.0586245772266065	2			-	74	PoFV_scaffold_3866:3124-2846(-)	PoFV_scaffold_3866:3124-2846(-)	scaffold_3866_ORF.42;2653-3124(-)	2653.0	3124.0	-		1.6942446043165469	3124-2846	2846	3124	62.0	no	1.0	0.0	1.0	A
Q9YMI2_LdMNPV	PoFV_scaffold_3866:3124-2846(-)	41.2	87	49	0	5	89	7	93	2.126e-12	66	354	93	0.935	0.24	Cluster56	PoFV_scaffold_3866:3124-2846(-)	scaffold_3866	0.382792130836691	36.1767801270503	21094.0	36.0	scaffold_3866	728	36.0	33.96815107102593	0.0586245772266065	2			-	74	PoFV_scaffold_3866:3124-2846(-)	PoFV_scaffold_3866:3124-2846(-)	scaffold_3866_ORF.12;4810-5110(+)	4810.0	5110.0	-			3124-2846	2846	3124	64.0	no	1.0	0.0	1.0	A
PoFV_scaffold_18896_orf004	PoFV_scaffold_3866:3124-2846(-)	39.0	97	56	0	1	97	1	93	5.41e-15	68	126	93	1.0	0.77	Cluster56	PoFV_scaffold_3866:3124-2846(-)	scaffold_3866	0.382792130836691	36.1767801270503	21094.0	36.0	scaffold_3866	728	36.0	33.96815107102593	0.0586245772266065	2			-	74	PoFV_scaffold_3866:3124-2846(-)	PoFV_scaffold_3866:3124-2846(-)	scaffold_3866_ORF.42;2653-3124(-)	2653.0	3124.0	-		1.6942446043165469	3124-2846	2846	3124	62.0	no	1.0	0.0	1.0	A
PoFV_scaffold_18896_orf004	PoFV_scaffold_3866:3124-2846(-)	39.0	97	56	0	1	97	1	93	5.41e-15	68	126	93	1.0	0.77	Cluster56	PoFV_scaffold_3866:3124-2846(-)	scaffold_3866	0.382792130836691	36.1767801270503	21094.0	36.0	scaffold_3866	728	36.0	33.96815107102593	0.0586245772266065	2			-	74	PoFV_scaffold_3866:3124-2846(-)	PoFV_scaffold_3866:3124-2846(-)	scaffold_3866_ORF.12;4810-5110(+)	4810.0	5110.0	-			3124-2846	2846	3124	64.0	no	1.0	0.0	1.0	A
Q9YMH4_LdMNPV	PoFV_scaffold_3866:3124-2846(-)	35.3	89	56	0	5	93	7	93	5.475e-09	55	337	93	0.935	0.264	Cluster56	PoFV_scaffold_3866:3124-2846(-)	scaffold_3866	0.382792130836691	36.1767801270503	21094.0	36.0	scaffold_3866	728	36.0	33.96815107102593	0.0586245772266065	2			-	74	PoFV_scaffold_3866:3124-2846(-)	PoFV_scaffold_3866:3124-2846(-)	scaffold_3866_ORF.42;2653-3124(-)	2653.0	3124.0	-		1.6942446043165469	3124-2846	2846	3124	62.0	no	1.0	0.0	1.0	A
Q9YMH4_LdMNPV	PoFV_scaffold_3866:3124-2846(-)	35.3	89	56	0	5	93	7	93	5.475e-09	55	337	93	0.935	0.264	Cluster56	PoFV_scaffold_3866:3124-2846(-)	scaffold_3866	0.382792130836691	36.1767801270503	21094.0	36.0	scaffold_3866	728	36.0	33.96815107102593	0.0586245772266065	2			-	74	PoFV_scaffold_3866:3124-2846(-)	PoFV_scaffold_3866:3124-2846(-)	scaffold_3866_ORF.12;4810-5110(+)	4810.0	5110.0	-			3124-2846	2846	3124	64.0	no	1.0	0.0	1.0	A
Q9YMI2_LdMNPV	PoFV_scaffold_3866:4826-5101(+)	38.8	85	51	0	6	89	1	85	2.026e-10	59	354	92	0.924	0.237	Cluster56	PoFV_scaffold_3866:4826-5101(+)	scaffold_3866	0.382792130836691	36.1767801270503	21094.0	36.0	scaffold_3866	728	36.0	33.96815107102593	0.0586245772266065	2			+	75	PoFV_scaffold_3866:4826-5101(+)	PoFV_scaffold_3866:4826-5101(+)	scaffold_3866_ORF.12;4810-5110(+)	4810.0	5110.0	-		1.0909090909090908	4826-5101	4826	5101	64.0	no	1.0	0.0	1.0	A
Q9YMI2_LdMNPV	PoFV_scaffold_3866:4826-5101(+)	38.8	85	51	0	6	89	1	85	2.026e-10	59	354	92	0.924	0.237	Cluster56	PoFV_scaffold_3866:4826-5101(+)	scaffold_3866	0.382792130836691	36.1767801270503	21094.0	36.0	scaffold_3866	728	36.0	33.96815107102593	0.0586245772266065	2			+	75	PoFV_scaffold_3866:4826-5101(+)	PoFV_scaffold_3866:4826-5101(+)	scaffold_3866_ORF.2;3756-4080(+)	3756.0	4080.0	-			4826-5101	4826	5101	63.0	no	1.0	0.0	1.0	A
Q9YMI2_LdMNPV	PoFV_scaffold_3866:4826-5101(+)	38.8	85	51	0	6	89	1	85	2.026e-10	59	354	92	0.924	0.237	Cluster56	PoFV_scaffold_3866:4826-5101(+)	scaffold_3866	0.382792130836691	36.1767801270503	21094.0	36.0	scaffold_3866	728	36.0	33.96815107102593	0.0586245772266065	2			+	75	PoFV_scaffold_3866:4826-5101(+)	PoFV_scaffold_3866:4826-5101(+)	scaffold_3866_ORF.42;2653-3124(-)	2653.0	3124.0	-			4826-5101	4826	5101	62.0	no	1.0	0.0	1.0	A
PoFV_scaffold_18896_orf004	PoFV_scaffold_3866:4826-5101(+)	33.1	97	61	0	8	104	1	92	2.339e-10	54	126	92	1.0	0.77	Cluster56	PoFV_scaffold_3866:4826-5101(+)	scaffold_3866	0.382792130836691	36.1767801270503	21094.0	36.0	scaffold_3866	728	36.0	33.96815107102593	0.0586245772266065	2			+	75	PoFV_scaffold_3866:4826-5101(+)	PoFV_scaffold_3866:4826-5101(+)	scaffold_3866_ORF.12;4810-5110(+)	4810.0	5110.0	-		1.0909090909090908	4826-5101	4826	5101	64.0	no	1.0	0.0	1.0	A
PoFV_scaffold_18896_orf004	PoFV_scaffold_3866:4826-5101(+)	33.1	97	61	0	8	104	1	92	2.339e-10	54	126	92	1.0	0.77	Cluster56	PoFV_scaffold_3866:4826-5101(+)	scaffold_3866	0.382792130836691	36.1767801270503	21094.0	36.0	scaffold_3866	728	36.0	33.96815107102593	0.0586245772266065	2			+	75	PoFV_scaffold_3866:4826-5101(+)	PoFV_scaffold_3866:4826-5101(+)	scaffold_3866_ORF.2;3756-4080(+)	3756.0	4080.0	-			4826-5101	4826	5101	63.0	no	1.0	0.0	1.0	A
PoFV_scaffold_18896_orf004	PoFV_scaffold_3866:4826-5101(+)	33.1	97	61	0	8	104	1	92	2.339e-10	54	126	92	1.0	0.77	Cluster56	PoFV_scaffold_3866:4826-5101(+)	scaffold_3866	0.382792130836691	36.1767801270503	21094.0	36.0	scaffold_3866	728	36.0	33.96815107102593	0.0586245772266065	2			+	75	PoFV_scaffold_3866:4826-5101(+)	PoFV_scaffold_3866:4826-5101(+)	scaffold_3866_ORF.42;2653-3124(-)	2653.0	3124.0	-			4826-5101	4826	5101	62.0	no	1.0	0.0	1.0	A
Q9YMH4_LdMNPV	PoFV_scaffold_3866:4826-5101(+)	35.5	88	54	0	6	93	1	85	5.475e-09	55	337	92	0.924	0.261	Cluster56	PoFV_scaffold_3866:4826-5101(+)	scaffold_3866	0.382792130836691	36.1767801270503	21094.0	36.0	scaffold_3866	728	36.0	33.96815107102593	0.0586245772266065	2			+	75	PoFV_scaffold_3866:4826-5101(+)	PoFV_scaffold_3866:4826-5101(+)	scaffold_3866_ORF.12;4810-5110(+)	4810.0	5110.0	-		1.0909090909090908	4826-5101	4826	5101	64.0	no	1.0	0.0	1.0	A
Q9YMH4_LdMNPV	PoFV_scaffold_3866:4826-5101(+)	35.5	88	54	0	6	93	1	85	5.475e-09	55	337	92	0.924	0.261	Cluster56	PoFV_scaffold_3866:4826-5101(+)	scaffold_3866	0.382792130836691	36.1767801270503	21094.0	36.0	scaffold_3866	728	36.0	33.96815107102593	0.0586245772266065	2			+	75	PoFV_scaffold_3866:4826-5101(+)	PoFV_scaffold_3866:4826-5101(+)	scaffold_3866_ORF.2;3756-4080(+)	3756.0	4080.0	-			4826-5101	4826	5101	63.0	no	1.0	0.0	1.0	A
Q9YMH4_LdMNPV	PoFV_scaffold_3866:4826-5101(+)	35.5	88	54	0	6	93	1	85	5.475e-09	55	337	92	0.924	0.261	Cluster56	PoFV_scaffold_3866:4826-5101(+)	scaffold_3866	0.382792130836691	36.1767801270503	21094.0	36.0	scaffold_3866	728	36.0	33.96815107102593	0.0586245772266065	2			+	75	PoFV_scaffold_3866:4826-5101(+)	PoFV_scaffold_3866:4826-5101(+)	scaffold_3866_ORF.42;2653-3124(-)	2653.0	3124.0	-			4826-5101	4826	5101	62.0	no	1.0	0.0	1.0	A
Q9YMI2_LdMNPV	PoFV_scaffold_11746:849-1181(+)	36.4	89	55	0	5	91	7	95	1.111e-09	57	354	111	0.802	0.246	Cluster56	PoFV_scaffold_11746:849-1181(+)	scaffold_11746	0.307386814932486	34.7995498477426	7553.0	35.0	scaffold_11746	299	35.0	33.96815107102593	0.1567080045095828	1			+	12	PoFV_scaffold_11746:849-1181(+)	PoFV_scaffold_11746:849-1181(+)	scaffold_11746_ORF.4;839-1718(+)	839.0	1718.0	-		2.647590361445783	849-1181	849	1181	12.0	no	0.0	1.0	1.0	A
PoFV_scaffold_18896_orf004	PoFV_scaffold_11746:849-1181(+)	31.7	120	75	0	1	120	1	111	4.411e-13	62	126	111	1.0	0.952	Cluster56	PoFV_scaffold_11746:849-1181(+)	scaffold_11746	0.307386814932486	34.7995498477426	7553.0	35.0	scaffold_11746	299	35.0	33.96815107102593	0.1567080045095828	1			+	12	PoFV_scaffold_11746:849-1181(+)	PoFV_scaffold_11746:849-1181(+)	scaffold_11746_ORF.4;839-1718(+)	839.0	1718.0	-		2.647590361445783	849-1181	849	1181	12.0	no	0.0	1.0	1.0	A
LbFV_YP_009345618.1	PoFV_scaffold_11746:849-1181(+)	30.7	108	69	0	86	186	3	110	7.35e-09	54	299	111	0.973	0.338	Cluster56	PoFV_scaffold_11746:849-1181(+)	scaffold_11746	0.307386814932486	34.7995498477426	7553.0	35.0	scaffold_11746	299	35.0	33.96815107102593	0.1567080045095828	1			+	12	PoFV_scaffold_11746:849-1181(+)	PoFV_scaffold_11746:849-1181(+)	scaffold_11746_ORF.4;839-1718(+)	839.0	1718.0	-		2.647590361445783	849-1181	849	1181	12.0	no	0.0	1.0	1.0	A
Q9YMH4_LdMNPV	PoFV_scaffold_11746:849-1181(+)	38.4	91	54	0	7	95	5	95	1.842e-13	63	337	111	0.802	0.27	Cluster56	PoFV_scaffold_11746:849-1181(+)	scaffold_11746	0.307386814932486	34.7995498477426	7553.0	35.0	scaffold_11746	299	35.0	33.96815107102593	0.1567080045095828	1			+	12	PoFV_scaffold_11746:849-1181(+)	PoFV_scaffold_11746:849-1181(+)	scaffold_11746_ORF.4;839-1718(+)	839.0	1718.0	-		2.647590361445783	849-1181	849	1181	12.0	no	0.0	1.0	1.0	A
PoFV_scaffold_7638_orf011	PoFV_scaffold_44098:3892-3602(-)	81.4	97	18	0	8	104	1	97	3.772e-49	165	105	97	1.0	0.924	Cluster56	PoFV_scaffold_44098:3892-3602(-)	scaffold_44098	0.305243759423689	30.2637399463807	5968.0	31.0	scaffold_44098	105	31.0	33.96815107102593	0.0377677564825253	1			-	82	PoFV_scaffold_44098:3892-3602(-)	PoFV_scaffold_44098:3892-3602(-)	scaffold_44098_ORF.7;3601-3910(-)	3601.0	3910.0	-		1.0655172413793104	3892-3602	3602	3892	71.0	no	0.0	0.0	0.0	C
PoFV_scaffold_18896_orf004	PoFV_scaffold_5109:10090-10236(+)	57.1	52	21	0	14	65	1	49	2.121e-12	60	126	49	1.0	0.413	Cluster56	PoFV_scaffold_5109:10090-10236(+)	scaffold_5109	0.370441619270659	30.6426898628304	11956.0	31.0	scaffold_5109	326	31.0	33.96815107102593	0.0377677564825253	1			+	87	PoFV_scaffold_5109:10090-10236(+)								10090-10236	10090	10236		no	0.0	0.0	0.0	C
PoFV_scaffold_18896_orf003	PoFV_scaffold_29373:1788-2798(+)	29.1	337	230	0	87	412	1	337	4.183e-38	147	432	337	1.0	0.755	Cluster56	PoFV_scaffold_29373:1788-2798(+)	scaffold_29373	0.27808553068912	30.0097517730496	4512.0	32.0	scaffold_29373	432	32.0	33.96815107102593	0.0935738444193912	1			+	56	PoFV_scaffold_29373:1788-2798(+)	PoFV_scaffold_29373:1788-2798(+)	scaffold_29373_ORF.2;992-2897(+)	992.0	2897.0	-		1.886138613861386	1788-2798	1788	2798	48.0	no	0.0	0.0	0.0	C
DFV_QKN22513.1	PoFV_scaffold_17380:1720-962(-)	23.8	240	168	0	12	232	12	251	2.512e-16	76	233	253	0.949	0.948	Cluster339	PoFV_scaffold_17380:1720-962(-)	scaffold_17380	0.297796093889984	32.5161290322581	5580.0	33.0	scaffold_17380	156	33.0	33.96815107102593	0.2068771138669673	1			-	26	PoFV_scaffold_17380:1720-962(-)	PoFV_scaffold_17380:1720-962(-)	scaffold_17380_ORF.13;961-1714(-)	961.0	1714.0	-		0.9934036939313984	1720-962	962	1720	22.0	no	0.0	0.0	0.0	C
PoFV_scaffold_2702_orf003	PoFV_scaffold_17380:1720-962(-)	81.0	253	46	0	3	247	1	253	9.813e-136	422	248	253	1.0	0.988	Cluster339	PoFV_scaffold_17380:1720-962(-)	scaffold_17380	0.297796093889984	32.5161290322581	5580.0	33.0	scaffold_17380	156	33.0	33.96815107102593	0.2068771138669673	1			-	26	PoFV_scaffold_17380:1720-962(-)	PoFV_scaffold_17380:1720-962(-)	scaffold_17380_ORF.13;961-1714(-)	961.0	1714.0	-		0.9934036939313984	1720-962	962	1720	22.0	no	0.0	0.0	0.0	C
LbFV_YP_009345689.1	PoFV_scaffold_17380:1720-962(-)	26.8	243	153	0	4	213	11	253	1.169e-22	94	215	253	0.96	0.977	Cluster339	PoFV_scaffold_17380:1720-962(-)	scaffold_17380	0.297796093889984	32.5161290322581	5580.0	33.0	scaffold_17380	156	33.0	33.96815107102593	0.2068771138669673	1			-	26	PoFV_scaffold_17380:1720-962(-)	PoFV_scaffold_17380:1720-962(-)	scaffold_17380_ORF.13;961-1714(-)	961.0	1714.0	-		0.9934036939313984	1720-962	962	1720	22.0	no	0.0	0.0	0.0	C
B2YG85_MdSGHV	PoFV_scaffold_17380:1720-962(-)	28.4	161	112	0	43	200	82	242	1.295e-14	70	206	253	0.636	0.767	Cluster339	PoFV_scaffold_17380:1720-962(-)	scaffold_17380	0.297796093889984	32.5161290322581	5580.0	33.0	scaffold_17380	156	33.0	33.96815107102593	0.2068771138669673	1			-	26	PoFV_scaffold_17380:1720-962(-)	PoFV_scaffold_17380:1720-962(-)	scaffold_17380_ORF.13;961-1714(-)	961.0	1714.0	-		0.9934036939313984	1720-962	962	1720	22.0	no	0.0	0.0	0.0	C
DFV_QKN22513.1	PoFV_scaffold_983:16646-15991(-)	30.9	140	87	0	12	151	11	137	3.181e-14	69	233	218	0.583	0.601	Cluster339	PoFV_scaffold_983:16646-15991(-)	scaffold_983	0.312990207453474	33.4340016708438	21546.0	33.0	scaffold_983	123	33.0	33.96815107102593	0.2068771138669673	2	70.0	24.0	-	136	PoFV_scaffold_983:16646-15991(-)	PoFV_scaffold_983:16646-15991(-)	scaffold_983_ORF.30;16166-16643(-)	16166.0	16643.0	-		0.7282442748091603	16646-15991	15991	16646	112.0	yes	0.0	0.0	0.0	C
PoFV_scaffold_2702_orf003	PoFV_scaffold_983:16646-15991(-)	66.8	161	45	0	4	164	1	137	3.181e-64	216	248	218	0.628	0.649	Cluster339	PoFV_scaffold_983:16646-15991(-)	scaffold_983	0.312990207453474	33.4340016708438	21546.0	33.0	scaffold_983	123	33.0	33.96815107102593	0.2068771138669673	2	70.0	24.0	-	136	PoFV_scaffold_983:16646-15991(-)	PoFV_scaffold_983:16646-15991(-)	scaffold_983_ORF.30;16166-16643(-)	16166.0	16643.0	-		0.7282442748091603	16646-15991	15991	16646	112.0	yes	0.0	0.0	0.0	C
LbFV_YP_009345689.1	PoFV_scaffold_983:16646-15991(-)	34.9	130	83	0	4	132	10	139	6.573e-17	77	215	218	0.596	0.6	Cluster339	PoFV_scaffold_983:16646-15991(-)	scaffold_983	0.312990207453474	33.4340016708438	21546.0	33.0	scaffold_983	123	33.0	33.96815107102593	0.2068771138669673	2	70.0	24.0	-	136	PoFV_scaffold_983:16646-15991(-)	PoFV_scaffold_983:16646-15991(-)	scaffold_983_ORF.30;16166-16643(-)	16166.0	16643.0	-		0.7282442748091603	16646-15991	15991	16646	112.0	yes	0.0	0.0	0.0	C
PoFV_scaffold_2702_orf005	PoFV_scaffold_17380:2-487(+)	93.2	162	11	0	195	356	1	162	9.358e-98	319	357	162	1.0	0.454	Cluster536	PoFV_scaffold_17380:2-487(+)	scaffold_17380	0.297796093889984	32.5161290322581	5580.0	33.0	scaffold_17380	156	33.0	33.96815107102593	0.2068771138669673	1			+	24	PoFV_scaffold_17380:2-487(+)	PoFV_scaffold_17380:2-487(+)	scaffold_17380_ORF.2;61-487(+)	61.0	487.0	-		0.8783505154639175	2-487	2	487	20.0	no	0.0	0.0	0.0	C
PoFV_scaffold_2702_orf005	PoFV_scaffold_983:14655-15641(+)	59.3	356	133	0	1	356	1	329	2.955e-129	410	357	329	1.0	0.997	Cluster536	PoFV_scaffold_983:14655-15641(+)	scaffold_983	0.312990207453474	33.4340016708438	21546.0	33.0	scaffold_983	123	33.0	33.96815107102593	0.2068771138669673	1			+	134	PoFV_scaffold_983:14655-15641(+)	PoFV_scaffold_983:14655-15641(+)	scaffold_983_ORF.20;14654-15641(+)	14654.0	15641.0	-		1.0010141987829615	14655-15641	14655	15641	111.0	no	0.0	0.0	0.0	C
PoFV_scaffold_2702_orf005	PoFV_scaffold_7821:14388-15077(+)	73.6	230	58	0	1	220	1	230	1.306e-106	344	357	230	1.0	0.616	Cluster536	PoFV_scaffold_7821:14388-15077(+)	scaffold_7821	0.31157978511739	32.6687669960868	15077.0	33.0	scaffold_7821	123	33.0	33.96815107102593	0.2068771138669673	1			+	113	PoFV_scaffold_7821:14388-15077(+)								14388-15077	14388	15077		no	0.0	0.0	0.0	C
PoFV_scaffold_2702_orf004	PoFV_scaffold_17380:848-528(-)	57.3	111	45	0	1	111	1	107	3.897e-35	125	112	107	1.0	0.991	Cluster922	PoFV_scaffold_17380:848-528(-)	scaffold_17380	0.297796093889984	32.5161290322581	5580.0	33.0	scaffold_17380	156	33.0	33.96815107102593	0.2068771138669673	1			-	25	PoFV_scaffold_17380:848-528(-)	PoFV_scaffold_17380:848-528(-)	scaffold_17380_ORF.10;524-848(-)	524.0	848.0	-		1.0125	848-528	528	848	21.0	no	0.0	0.0	0.0	C
PoFV_scaffold_2702_orf004	PoFV_scaffold_983:15933-15673(-)	31.4	110	59	0	1	110	1	87	2.171e-11	57	112	87	1.0	0.982	Cluster922	PoFV_scaffold_983:15933-15673(-)	scaffold_983	0.312990207453474	33.4340016708438	21546.0	33.0	scaffold_983	123	33.0	33.96815107102593	0.2068771138669673	1			-	135	PoFV_scaffold_983:15933-15673(-)								15933-15673	15673	15933		no	0.0	0.0	0.0	C
PoFV_scaffold_2702_orf001	PoFV_scaffold_17380:2154-2534(+)	86.1	127	18	0	27	153	1	127	1.802e-70	229	156	127	1.0	0.814	Cluster1217	PoFV_scaffold_17380:2154-2534(+)	scaffold_17380	0.297796093889984	32.5161290322581	5580.0	33.0	scaffold_17380	156	33.0	33.96815107102593	0.2068771138669673	1			+	27	PoFV_scaffold_17380:2154-2534(+)	PoFV_scaffold_17380:2154-2534(+)	scaffold_17380_ORF.6;2162-2537(+)	2162.0	2537.0	-		0.986842105263158	2154-2534	2154	2534	23.0	no	0.0	0.0	0.0	C
PoFV_scaffold_9017_orf006	PoFV_scaffold_10234:3215-3021(-)	86.4	65	9	0	1	65	1	65	4.942e-34	119	66	65	1.0	0.985	Cluster188	PoFV_scaffold_10234:3215-3021(-)	scaffold_10234	0.276162790697674	30.8259236826166	8255.0	31.0	scaffold_10234	460	31.0	33.96815107102593	0.0377677564825253	1			-	6	PoFV_scaffold_10234:3215-3021(-)	PoFV_scaffold_10234:3215-3021(-)	scaffold_10234_ORF.13;3020-3218(-)	3020.0	3218.0	-		1.0206185567010309	3215-3021	3021	3215	6.0	no	0.0	0.0	0.0	C
PoFV_scaffold_9017_orf001	PoFV_scaffold_10234:6033-7417(+)	67.3	126	40	0	1	123	1	126	5.722e-46	171	460	461	0.273	0.267	Cluster237	PoFV_scaffold_10234:6033-7417(+)	scaffold_10234	0.276162790697674	30.8259236826166	8255.0	31.0	scaffold_10234	460	31.0	33.96815107102593	0.0377677564825253	2	27.0	38.0	+	10	PoFV_scaffold_10234:6033-7417(+)	PoFV_scaffold_10234:6033-7417(+)	scaffold_10234_ORF.11;6032-6368(+)	6032.0	6368.0	-		0.2427745664739884	6033-7417	6033	7417	10.0	yes	0.0	0.0	0.0	C
PoFV_scaffold_9017_orf010	PoFV_scaffold_10234:97-1090(+)	71.6	81	22	0	1	81	1	80	5.6270000000000005e-30	119	333	331	0.242	0.243	Cluster355	PoFV_scaffold_10234:97-1090(+)	scaffold_10234	0.276162790697674	30.8259236826166	8255.0	31.0	scaffold_10234	460	31.0	33.96815107102593	0.0377677564825253	2	9.0	40.0	+	2	PoFV_scaffold_10234:97-1090(+)	PoFV_scaffold_10234:97-1090(+)	scaffold_10234_ORF.1;96-300(+)	96.0	300.0	-		0.2054380664652568	97-1090	97	1090	2.0	yes	0.0	0.0	0.0	C
PoFV_scaffold_9017_orf010	PoFV_scaffold_27772:5385-6363(+)	62.6	108	39	0	1	106	1	108	2.864e-35	135	333	326	0.331	0.318	Cluster355	PoFV_scaffold_27772:5385-6363(+)	scaffold_27772	0.311890287006928	31.4998585972851	7072.0	32.0	scaffold_27772	410	32.0	33.96815107102593	0.0935738444193912	2	1.0	41.0	+	53	PoFV_scaffold_27772:5385-6363(+)	PoFV_scaffold_27772:5385-6363(+)	scaffold_27772_ORF.12;5312-5726(+)	5312.0	5726.0	-		0.4233128834355828	5385-6363	5385	6363	45.0	yes	0.0	0.0	0.0	C
PoFV_scaffold_9017_orf007	PoFV_scaffold_10234:2988-2779(-)	83.8	70	11	0	1	70	1	70	1.417e-35	124	71	70	1.0	0.986	Cluster372	PoFV_scaffold_10234:2988-2779(-)	scaffold_10234	0.276162790697674	30.8259236826166	8255.0	31.0	scaffold_10234	460	31.0	33.96815107102593	0.0377677564825253	1			-	5	PoFV_scaffold_10234:2988-2779(-)	PoFV_scaffold_10234:2988-2779(-)	scaffold_10234_ORF.19;2778-2988(-)	2778.0	2988.0	-		1.0047846889952152	2988-2779	2779	2988	5.0	no	0.0	0.0	0.0	C
PoFV_scaffold_9017_orf004	PoFV_scaffold_10234:3639-4663(+)	81.7	174	31	0	3	176	1	173	3.604e-89	295	374	341	0.507	0.465	Cluster477	PoFV_scaffold_10234:3639-4663(+)	scaffold_10234	0.276162790697674	30.8259236826166	8255.0	31.0	scaffold_10234	460	31.0	33.96815107102593	0.0377677564825253	2	24.0	39.0	+	8	PoFV_scaffold_10234:3639-4663(+)	PoFV_scaffold_10234:3639-4663(+)	scaffold_10234_ORF.10;3635-4166(+)	3635.0	4166.0	-		0.5185546875	3639-4663	3639	4663	8.0	yes	0.0	0.0	0.0	C
LbFV_YP_009345664.1	PoFV_scaffold_10234:3639-4663(+)	31.1	166	111	0	3	164	3	168	1.278e-17	82	362	341	0.487	0.448	Cluster477	PoFV_scaffold_10234:3639-4663(+)	scaffold_10234	0.276162790697674	30.8259236826166	8255.0	31.0	scaffold_10234	460	31.0	33.96815107102593	0.0377677564825253	2	24.0	39.0	+	8	PoFV_scaffold_10234:3639-4663(+)	PoFV_scaffold_10234:3639-4663(+)	scaffold_10234_ORF.10;3635-4166(+)	3635.0	4166.0	-		0.5185546875	3639-4663	3639	4663	8.0	yes	0.0	0.0	0.0	C
DFV_QKN22504.1	PoFV_scaffold_10234:3639-4663(+)	29.4	170	118	0	30	199	2	169	8.325e-16	77	412	341	0.493	0.413	Cluster477	PoFV_scaffold_10234:3639-4663(+)	scaffold_10234	0.276162790697674	30.8259236826166	8255.0	31.0	scaffold_10234	460	31.0	33.96815107102593	0.0377677564825253	2	24.0	39.0	+	8	PoFV_scaffold_10234:3639-4663(+)	PoFV_scaffold_10234:3639-4663(+)	scaffold_10234_ORF.10;3635-4166(+)	3635.0	4166.0	-		0.5185546875	3639-4663	3639	4663	8.0	yes	0.0	0.0	0.0	C
B2YG23_MdSGHV	PoFV_scaffold_10234:3639-4663(+)	27.8	156	97	0	2	137	2	157	3.74e-12	65	396	341	0.457	0.343	Cluster477	PoFV_scaffold_10234:3639-4663(+)	scaffold_10234	0.276162790697674	30.8259236826166	8255.0	31.0	scaffold_10234	460	31.0	33.96815107102593	0.0377677564825253	2	24.0	39.0	+	8	PoFV_scaffold_10234:3639-4663(+)	PoFV_scaffold_10234:3639-4663(+)	scaffold_10234_ORF.10;3635-4166(+)	3635.0	4166.0	-		0.5185546875	3639-4663	3639	4663	8.0	yes	0.0	0.0	0.0	C
B0YLG0_GpSGHV	PoFV_scaffold_10234:3639-4663(+)	24.5	150	98	0	18	148	5	154	8.057e-08	51	362	341	0.44	0.362	Cluster477	PoFV_scaffold_10234:3639-4663(+)	scaffold_10234	0.276162790697674	30.8259236826166	8255.0	31.0	scaffold_10234	460	31.0	33.96815107102593	0.0377677564825253	2	24.0	39.0	+	8	PoFV_scaffold_10234:3639-4663(+)	PoFV_scaffold_10234:3639-4663(+)	scaffold_10234_ORF.10;3635-4166(+)	3635.0	4166.0	-		0.5185546875	3639-4663	3639	4663	8.0	yes	0.0	0.0	0.0	C
PoFV_scaffold_9017_orf004	PoFV_scaffold_84473:912-1202(+)	61.8	104	37	0	3	106	1	97	1.314e-32	128	374	97	1.0	0.278	Cluster477	PoFV_scaffold_84473:912-1202(+)	scaffold_84473	0.261001517450683	28.4950645406226	1317.0	31.0	scaffold_84473	106	31.0	33.96815107102593	0.0377677564825253	1			+	125	PoFV_scaffold_84473:912-1202(+)	PoFV_scaffold_84473:912-1202(+)	scaffold_84473_ORF.2;908-1259(+)	908.0	1259.0	-		1.210344827586207	912-1202	912	1202	101.0	no	0.0	0.0	0.0	C
LbFV_YP_009345664.1	PoFV_scaffold_84473:912-1202(+)	32.5	99	63	0	3	101	3	97	1.119e-08	54	362	97	0.979	0.273	Cluster477	PoFV_scaffold_84473:912-1202(+)	scaffold_84473	0.261001517450683	28.4950645406226	1317.0	31.0	scaffold_84473	106	31.0	33.96815107102593	0.0377677564825253	1			+	125	PoFV_scaffold_84473:912-1202(+)	PoFV_scaffold_84473:912-1202(+)	scaffold_84473_ORF.2;908-1259(+)	908.0	1259.0	-		1.210344827586207	912-1202	912	1202	101.0	no	0.0	0.0	0.0	C
PoFV_scaffold_9017_orf003	PoFV_scaffold_10234:4697-5422(+)	76.4	242	55	0	1	233	1	242	1.212e-120	378	236	242	1.0	0.987	Cluster648	PoFV_scaffold_10234:4697-5422(+)	scaffold_10234	0.276162790697674	30.8259236826166	8255.0	31.0	scaffold_10234	460	31.0	33.96815107102593	0.0377677564825253	1			+	9	PoFV_scaffold_10234:4697-5422(+)	PoFV_scaffold_10234:4697-5422(+)	scaffold_10234_ORF.7;4696-5428(+)	4696.0	5428.0	-		1.0096551724137932	4697-5422	4697	5422	9.0	no	0.0	0.0	0.0	C
PoFV_scaffold_9017_orf008	PoFV_scaffold_10234:2720-2388(-)	88.7	111	12	0	1	111	1	111	7.867e-64	207	112	111	1.0	0.991	Cluster468	PoFV_scaffold_10234:2720-2388(-)	scaffold_10234	0.276162790697674	30.8259236826166	8255.0	31.0	scaffold_10234	460	31.0	33.96815107102593	0.0377677564825253	1			-	4	PoFV_scaffold_10234:2720-2388(-)	PoFV_scaffold_10234:2720-2388(-)	scaffold_10234_ORF.14;2387-2720(-)	2387.0	2720.0	-		1.0030120481927711	2720-2388	2388	2720	4.0	no	0.0	0.0	0.0	C
PoFV_scaffold_9017_orf009	PoFV_scaffold_10234:1107-2342(+)	82.1	412	72	0	5	409	1	412	9.898e-228	697	410	412	1.0	0.988	Cluster349	PoFV_scaffold_10234:1107-2342(+)	scaffold_10234	0.276162790697674	30.8259236826166	8255.0	31.0	scaffold_10234	460	31.0	33.96815107102593	0.0377677564825253	1			+	3	PoFV_scaffold_10234:1107-2342(+)	PoFV_scaffold_10234:1107-2342(+)	scaffold_10234_ORF.9;1226-2342(+)	1226.0	2342.0	-		0.9036437246963562	1107-2342	1107	2342	3.0	no	0.0	0.0	0.0	C
LbFV_YP_009345706.1	PoFV_scaffold_10234:1107-2342(+)	22.7	410	266	0	7	351	1	410	3.711e-28	115	360	412	0.995	0.958	Cluster349	PoFV_scaffold_10234:1107-2342(+)	scaffold_10234	0.276162790697674	30.8259236826166	8255.0	31.0	scaffold_10234	460	31.0	33.96815107102593	0.0377677564825253	1			+	3	PoFV_scaffold_10234:1107-2342(+)	PoFV_scaffold_10234:1107-2342(+)	scaffold_10234_ORF.9;1226-2342(+)	1226.0	2342.0	-		0.9036437246963562	1107-2342	1107	2342	3.0	no	0.0	0.0	0.0	C
PoFV_scaffold_9017_orf005	PoFV_scaffold_10234:3235-3525(+)	92.6	97	7	0	1	97	1	97	4.7020000000000004e-58	190	106	97	1.0	0.915	Cluster670	PoFV_scaffold_10234:3235-3525(+)	scaffold_10234	0.276162790697674	30.8259236826166	8255.0	31.0	scaffold_10234	460	31.0	33.96815107102593	0.0377677564825253	1			+	7	PoFV_scaffold_10234:3235-3525(+)	PoFV_scaffold_10234:3235-3525(+)	scaffold_10234_ORF.3;3228-3537(+)	3228.0	3537.0	-		1.0655172413793104	3235-3525	3235	3525	7.0	no	0.0	0.0	0.0	C
PoFV_scaffold_9017_orf005	PoFV_scaffold_84473:533-823(+)	83.1	97	16	0	1	97	1	97	1.676e-50	169	106	97	1.0	0.915	Cluster670	PoFV_scaffold_84473:533-823(+)	scaffold_84473	0.261001517450683	28.4950645406226	1317.0	31.0	scaffold_84473	106	31.0	33.96815107102593	0.0377677564825253	1			+	124	PoFV_scaffold_84473:533-823(+)	PoFV_scaffold_84473:533-823(+)	scaffold_84473_ORF.1;532-841(+)	532.0	841.0	-		1.0655172413793104	533-823	533	823	100.0	no	0.0	0.0	0.0	C
DFV_QKN22518.1	PoFV_scaffold_7180:9766-6105(-)	28.5	512	358	0	33	534	59	570	3.428e-56	213	1252	1220	0.42	0.401	Cluster197	PoFV_scaffold_7180:9766-6105(-)	scaffold_7180	0.312653865091088	31.1570809533189	10154.0	32.0	scaffold_7180	318	32.0	33.96815107102593	0.0935738444193912	3	70.0	10.0	-	100	PoFV_scaffold_7180:9766-6105(-)	PoFV_scaffold_7180:9766-6105(-)	scaffold_7180_ORF.15;7648-9766(-)	7648.0	9766.0	-		0.5785304561595193	9766-6105	6105	9766	84.0	yes	0.0	0.0	0.0	C
LbFV_YP_009345662.1	PoFV_scaffold_7180:9766-6105(-)	31.1	551	372	0	50	590	66	616	1.055e-71	264	1308	1220	0.452	0.414	Cluster197	PoFV_scaffold_7180:9766-6105(-)	scaffold_7180	0.312653865091088	31.1570809533189	10154.0	32.0	scaffold_7180	318	32.0	33.96815107102593	0.0935738444193912	3	70.0	10.0	-	100	PoFV_scaffold_7180:9766-6105(-)	PoFV_scaffold_7180:9766-6105(-)	scaffold_7180_ORF.15;7648-9766(-)	7648.0	9766.0	-		0.5785304561595193	9766-6105	6105	9766	84.0	yes	0.0	0.0	0.0	C
PoFV_scaffold_15158_orf009	PoFV_scaffold_7180:9766-6105(-)	87.4	713	88	0	1	713	1	698	0.0	1295	1280	1220	0.572	0.557	Cluster197	PoFV_scaffold_7180:9766-6105(-)	scaffold_7180	0.312653865091088	31.1570809533189	10154.0	32.0	scaffold_7180	318	32.0	33.96815107102593	0.0935738444193912	3	70.0	10.0	-	100	PoFV_scaffold_7180:9766-6105(-)	PoFV_scaffold_7180:9766-6105(-)	scaffold_7180_ORF.15;7648-9766(-)	7648.0	9766.0	-		0.5785304561595193	9766-6105	6105	9766	84.0	yes	0.0	0.0	0.0	C
PoFV_scaffold_15158_orf002	PoFV_scaffold_7180:291-680(+)	85.4	131	19	0	1	131	1	130	1.319e-72	234	132	130	1.0	0.992	Cluster228	PoFV_scaffold_7180:291-680(+)	scaffold_7180	0.312653865091088	31.1570809533189	10154.0	32.0	scaffold_7180	318	32.0	33.96815107102593	0.0935738444193912	1			+	95	PoFV_scaffold_7180:291-680(+)	PoFV_scaffold_7180:291-680(+)	scaffold_7180_ORF.7;290-680(+)	290.0	680.0	-		1.0025706940874035	291-680	291	680	79.0	no	0.0	0.0	0.0	C
PoFV_scaffold_15158_orf003	PoFV_scaffold_7180:775-1050(+)	78.0	92	20	0	1	90	1	92	6.943999999999999e-44	149	94	92	1.0	0.957	Cluster575	PoFV_scaffold_7180:775-1050(+)	scaffold_7180	0.312653865091088	31.1570809533189	10154.0	32.0	scaffold_7180	318	32.0	33.96815107102593	0.0935738444193912	1			+	96	PoFV_scaffold_7180:775-1050(+)	PoFV_scaffold_7180:775-1050(+)	scaffold_7180_ORF.1;774-1056(+)	774.0	1056.0	-		1.0254545454545454	775-1050	775	1050	80.0	no	0.0	0.0	0.0	C
PoFV_scaffold_15158_orf007	PoFV_scaffold_7180:4586-5533(+)	86.4	317	43	0	1	317	1	316	2.224e-185	570	318	316	1.0	0.997	Cluster602	PoFV_scaffold_7180:4586-5533(+)	scaffold_7180	0.312653865091088	31.1570809533189	10154.0	32.0	scaffold_7180	318	32.0	33.96815107102593	0.0935738444193912	1			+	99	PoFV_scaffold_7180:4586-5533(+)	PoFV_scaffold_7180:4586-5533(+)	scaffold_7180_ORF.4;4585-5533(+)	4585.0	5533.0	-		1.0010559662090812	4586-5533	4586	5533	83.0	no	0.0	0.0	0.0	C
DFV_QKN22481.1	PoFV_scaffold_7180:4204-1607(-)	23.4	663	458	0	13	611	202	864	1.388e-52	195	617	866	0.766	0.971	Cluster9	PoFV_scaffold_7180:4204-1607(-)	scaffold_7180	0.312653865091088	31.1570809533189	10154.0	32.0	scaffold_7180	318	32.0	33.96815107102593	0.0935738444193912	1			-	98	PoFV_scaffold_7180:4204-1607(-)	PoFV_scaffold_7180:4204-1607(-)	scaffold_7180_ORF.16;1600-4264(-)	1600.0	4264.0	-		1.0257989988448208	4204-1607	1607	4204	82.0	no	0.0	0.0	0.0	C
PoFV_scaffold_15158_orf005	PoFV_scaffold_7180:4204-1607(-)	85.0	866	126	0	1	839	1	866	0.0	1522	842	866	1.0	0.996	Cluster9	PoFV_scaffold_7180:4204-1607(-)	scaffold_7180	0.312653865091088	31.1570809533189	10154.0	32.0	scaffold_7180	318	32.0	33.96815107102593	0.0935738444193912	1			-	98	PoFV_scaffold_7180:4204-1607(-)	PoFV_scaffold_7180:4204-1607(-)	scaffold_7180_ORF.16;1600-4264(-)	1600.0	4264.0	-		1.0257989988448208	4204-1607	1607	4204	82.0	no	0.0	0.0	0.0	C
LbFV_YP_009345682.1	PoFV_scaffold_7180:4204-1607(-)	25.4	660	404	0	126	667	203	862	5.883e-62	225	676	866	0.762	0.802	Cluster9	PoFV_scaffold_7180:4204-1607(-)	scaffold_7180	0.312653865091088	31.1570809533189	10154.0	32.0	scaffold_7180	318	32.0	33.96815107102593	0.0935738444193912	1			-	98	PoFV_scaffold_7180:4204-1607(-)	PoFV_scaffold_7180:4204-1607(-)	scaffold_7180_ORF.16;1600-4264(-)	1600.0	4264.0	-		1.0257989988448208	4204-1607	1607	4204	82.0	no	0.0	0.0	0.0	C
DFV_QKN22481.1	PoFV_scaffold_6401:16593-18479(+)	23.5	459	332	0	152	610	195	629	7.532e-34	137	617	629	0.692	0.744	Cluster9	PoFV_scaffold_6401:16593-18479(+)	scaffold_6401	0.390088787941359	32.7785165606674	24214.0	33.0	scaffold_6401	275	33.0	33.96815107102593	0.2068771138669673	2	27.0	8.0	+	91	PoFV_scaffold_6401:16593-18479(+)	PoFV_scaffold_6401:16593-18479(+)	scaffold_6401_ORF.33;16649-17627(+)	16649.0	17627.0	-		0.5185577942735949	16593-18479	16593	18479	75.0	yes	1.0	0.0	1.0	A
DFV_QKN22481.1	PoFV_scaffold_6401:16593-18479(+)	23.5	459	332	0	152	610	195	629	7.532e-34	137	617	629	0.692	0.744	Cluster9	PoFV_scaffold_6401:16593-18479(+)	scaffold_6401	0.390088787941359	32.7785165606674	24214.0	33.0	scaffold_6401	275	33.0	33.96815107102593	0.2068771138669673	2	27.0	8.0	+	91	PoFV_scaffold_6401:16593-18479(+)	PoFV_scaffold_6401:16593-18479(+)	scaffold_6401_ORF.34;17705-18521(+)	17705.0	18521.0	-		0.432661717921527	16593-18479	16593	18479	76.0	yes	1.0	0.0	1.0	A
PoFV_scaffold_15158_orf005	PoFV_scaffold_6401:16593-18479(+)	27.7	667	454	0	170	836	1	629	2.224e-73	264	842	629	1.0	0.792	Cluster9	PoFV_scaffold_6401:16593-18479(+)	scaffold_6401	0.390088787941359	32.7785165606674	24214.0	33.0	scaffold_6401	275	33.0	33.96815107102593	0.2068771138669673	2	27.0	8.0	+	91	PoFV_scaffold_6401:16593-18479(+)	PoFV_scaffold_6401:16593-18479(+)	scaffold_6401_ORF.33;16649-17627(+)	16649.0	17627.0	-		0.5185577942735949	16593-18479	16593	18479	75.0	yes	1.0	0.0	1.0	A
PoFV_scaffold_15158_orf005	PoFV_scaffold_6401:16593-18479(+)	27.7	667	454	0	170	836	1	629	2.224e-73	264	842	629	1.0	0.792	Cluster9	PoFV_scaffold_6401:16593-18479(+)	scaffold_6401	0.390088787941359	32.7785165606674	24214.0	33.0	scaffold_6401	275	33.0	33.96815107102593	0.2068771138669673	2	27.0	8.0	+	91	PoFV_scaffold_6401:16593-18479(+)	PoFV_scaffold_6401:16593-18479(+)	scaffold_6401_ORF.34;17705-18521(+)	17705.0	18521.0	-		0.432661717921527	16593-18479	16593	18479	76.0	yes	1.0	0.0	1.0	A
LbFV_YP_009345682.1	PoFV_scaffold_6401:16593-18479(+)	26.4	444	308	0	238	656	174	617	4.2620000000000004e-42	164	676	629	0.706	0.62	Cluster9	PoFV_scaffold_6401:16593-18479(+)	scaffold_6401	0.390088787941359	32.7785165606674	24214.0	33.0	scaffold_6401	275	33.0	33.96815107102593	0.2068771138669673	2	27.0	8.0	+	91	PoFV_scaffold_6401:16593-18479(+)	PoFV_scaffold_6401:16593-18479(+)	scaffold_6401_ORF.33;16649-17627(+)	16649.0	17627.0	-		0.5185577942735949	16593-18479	16593	18479	75.0	yes	1.0	0.0	1.0	A
LbFV_YP_009345682.1	PoFV_scaffold_6401:16593-18479(+)	26.4	444	308	0	238	656	174	617	4.2620000000000004e-42	164	676	629	0.706	0.62	Cluster9	PoFV_scaffold_6401:16593-18479(+)	scaffold_6401	0.390088787941359	32.7785165606674	24214.0	33.0	scaffold_6401	275	33.0	33.96815107102593	0.2068771138669673	2	27.0	8.0	+	91	PoFV_scaffold_6401:16593-18479(+)	PoFV_scaffold_6401:16593-18479(+)	scaffold_6401_ORF.34;17705-18521(+)	17705.0	18521.0	-		0.432661717921527	16593-18479	16593	18479	76.0	yes	1.0	0.0	1.0	A
B2YG51_MdSGHV	PoFV_scaffold_6401:16593-18479(+)	19.6	402	318	0	216	611	275	676	3.272e-17	83	699	629	0.63	0.575	Cluster9	PoFV_scaffold_6401:16593-18479(+)	scaffold_6401	0.390088787941359	32.7785165606674	24214.0	33.0	scaffold_6401	275	33.0	33.96815107102593	0.2068771138669673	2	27.0	8.0	+	91	PoFV_scaffold_6401:16593-18479(+)	PoFV_scaffold_6401:16593-18479(+)	scaffold_6401_ORF.33;16649-17627(+)	16649.0	17627.0	-		0.5185577942735949	16593-18479	16593	18479	75.0	yes	1.0	0.0	1.0	A
B2YG51_MdSGHV	PoFV_scaffold_6401:16593-18479(+)	19.6	402	318	0	216	611	275	676	3.272e-17	83	699	629	0.63	0.575	Cluster9	PoFV_scaffold_6401:16593-18479(+)	scaffold_6401	0.390088787941359	32.7785165606674	24214.0	33.0	scaffold_6401	275	33.0	33.96815107102593	0.2068771138669673	2	27.0	8.0	+	91	PoFV_scaffold_6401:16593-18479(+)	PoFV_scaffold_6401:16593-18479(+)	scaffold_6401_ORF.34;17705-18521(+)	17705.0	18521.0	-		0.432661717921527	16593-18479	16593	18479	76.0	yes	1.0	0.0	1.0	A
B0YLI6_GpSGHV	PoFV_scaffold_6401:16593-18479(+)	19.1	258	203	0	372	629	1	252	1.1e-07	52	260	629	0.41	0.969	Cluster9	PoFV_scaffold_6401:16593-18479(+)	scaffold_6401	0.390088787941359	32.7785165606674	24214.0	33.0	scaffold_6401	275	33.0	33.96815107102593	0.2068771138669673	2	27.0	8.0	+	91	PoFV_scaffold_6401:16593-18479(+)	PoFV_scaffold_6401:16593-18479(+)	scaffold_6401_ORF.33;16649-17627(+)	16649.0	17627.0	-		0.5185577942735949	16593-18479	16593	18479	75.0	yes	1.0	0.0	1.0	A
B0YLI6_GpSGHV	PoFV_scaffold_6401:16593-18479(+)	19.1	258	203	0	372	629	1	252	1.1e-07	52	260	629	0.41	0.969	Cluster9	PoFV_scaffold_6401:16593-18479(+)	scaffold_6401	0.390088787941359	32.7785165606674	24214.0	33.0	scaffold_6401	275	33.0	33.96815107102593	0.2068771138669673	2	27.0	8.0	+	91	PoFV_scaffold_6401:16593-18479(+)	PoFV_scaffold_6401:16593-18479(+)	scaffold_6401_ORF.34;17705-18521(+)	17705.0	18521.0	-		0.432661717921527	16593-18479	16593	18479	76.0	yes	1.0	0.0	1.0	A
PoFV_scaffold_15158_orf004	PoFV_scaffold_7180:1222-1497(+)	91.2	92	8	0	1	91	1	92	5.887e-54	178	92	92	1.0	0.989	Cluster527	PoFV_scaffold_7180:1222-1497(+)	scaffold_7180	0.312653865091088	31.1570809533189	10154.0	32.0	scaffold_7180	318	32.0	33.96815107102593	0.0935738444193912	1			+	97	PoFV_scaffold_7180:1222-1497(+)	PoFV_scaffold_7180:1222-1497(+)	scaffold_7180_ORF.2;1221-1497(+)	1221.0	1497.0	-		1.0036363636363637	1222-1497	1222	1497	81.0	no	0.0	0.0	0.0	C
PoFV_scaffold_15158_orf010	PoFV_scaffold_7180:10129-9815(-)	85.6	105	15	0	141	245	1	105	1.019e-54	188	246	105	1.0	0.427	Cluster108	PoFV_scaffold_7180:10129-9815(-)	scaffold_7180	0.312653865091088	31.1570809533189	10154.0	32.0	scaffold_7180	318	32.0	33.96815107102593	0.0935738444193912	1			-	101	PoFV_scaffold_7180:10129-9815(-)								10129-9815	9815	10129		no	0.0	0.0	0.0	C
PoFV_scaffold_15158_orf010	PoFV_scaffold_150917:435-734(+)	79.6	100	20	0	1	98	1	100	7.9049999999999965e-47	166	246	100	1.0	0.398	Cluster108	PoFV_scaffold_150917:435-734(+)	scaffold_150917	0.260471204188482	21.9200524246396	763.0	23.0	scaffold_150917	246	23.0	33.96815107102593	0.0	1			+	22	PoFV_scaffold_150917:435-734(+)	PoFV_scaffold_150917:435-734(+)	scaffold_150917_ORF.1;434-758(+)	434.0	758.0	-		1.0836120401337792	435-734	435	734	19.0	no	0.0	0.0	0.0	C
PoFV_scaffold_15158_orf011	PoFV_scaffold_150917:416-96(-)	74.3	107	26	0	1	102	1	107	3.144e-48	164	130	107	1.0	0.785	Cluster206	PoFV_scaffold_150917:416-96(-)	scaffold_150917	0.260471204188482	21.9200524246396	763.0	23.0	scaffold_150917	246	23.0	33.96815107102593	0.0	1			-	21	PoFV_scaffold_150917:416-96(-)	PoFV_scaffold_150917:416-96(-)	scaffold_150917_ORF.2;77-416(-)	77.0	416.0	-		1.059375	416-96	96	416	18.0	no	0.0	0.0	0.0	C
PoFV_scaffold_49244_orf002	PoFV_scaffold_64707:615-94(-)	68.4	189	55	0	1	189	1	174	1.926e-80	260	192	174	1.0	0.984	Cluster207	PoFV_scaffold_64707:615-94(-)	scaffold_64707	0.299879081015719	32.8947368421053	1653.0	34.0	scaffold_64707	275	34.0	33.96815107102593	0.3534385569334836	2	1.0	35.0	-	93	PoFV_scaffold_64707:615-94(-)	PoFV_scaffold_64707:615-94(-)	scaffold_64707_ORF.2;405-765(-)	405.0	765.0	-		0.690978886756238	615-94	94	615	78.0	yes	0.0	0.0	0.0	C
PoFV_scaffold_49244_orf002	PoFV_scaffold_373131:3-224(+)	72.5	75	20	0	99	173	1	74	2.431e-29	112	192	74	1.0	0.391	Cluster207	PoFV_scaffold_373131:3-224(+)	scaffold_373131	0.269911504424779	20.16	225.0	21.0	scaffold_373131	192	21.0	33.96815107102593	0.0	1			+	73	PoFV_scaffold_373131:3-224(+)								3-224	3	224		no	0.0	0.0	0.0	C
LbFV_YP_009345685.1	PoFV_scaffold_64707:1543-704(-)	21.3	262	183	0	293	526	1	262	2.95e-12	66	536	280	0.936	0.437	Cluster454	PoFV_scaffold_64707:1543-704(-)	scaffold_64707	0.299879081015719	32.8947368421053	1653.0	34.0	scaffold_64707	275	34.0	33.96815107102593	0.3534385569334836	1			-	94	PoFV_scaffold_64707:1543-704(-)	PoFV_scaffold_64707:1543-704(-)	scaffold_64707_ORF.3;703-1543(-)	703.0	1543.0	-		1.00119189511323	1543-704	704	1543	78.0	no	0.0	0.0	0.0	C
PoFV_scaffold_49244_orf001	PoFV_scaffold_64707:1543-704(-)	82.8	280	47	0	1	274	1	280	6.656000000000001e-155	479	275	280	1.0	0.996	Cluster454	PoFV_scaffold_64707:1543-704(-)	scaffold_64707	0.299879081015719	32.8947368421053	1653.0	34.0	scaffold_64707	275	34.0	33.96815107102593	0.3534385569334836	1			-	94	PoFV_scaffold_64707:1543-704(-)	PoFV_scaffold_64707:1543-704(-)	scaffold_64707_ORF.3;703-1543(-)	703.0	1543.0	-		1.00119189511323	1543-704	704	1543	78.0	no	0.0	0.0	0.0	C
B0YLR1_GpSGHV	PoFV_scaffold_33452_1:2005-2787(+)	31.8	109	68	0	184	284	150	258	2.263e-09	57	522	261	0.418	0.193	Cluster454	PoFV_scaffold_33452_1:2005-2787(+)	scaffold_33452_1	0.305017921146953	31.9111111111111	3489.0	31.0	scaffold_33452_1	109	31.0	33.96815107102593	0.0377677564825253	1			+	72	PoFV_scaffold_33452_1:2005-2787(+)								2005-2787	2005	2787		no	0.0	0.0	0.0	C
LbFV_YP_009345685.1	PoFV_scaffold_33452_1:2005-2787(+)	31.1	228	151	0	56	275	33	260	4.6400000000000006e-26	111	536	261	0.874	0.41	Cluster454	PoFV_scaffold_33452_1:2005-2787(+)	scaffold_33452_1	0.305017921146953	31.9111111111111	3489.0	31.0	scaffold_33452_1	109	31.0	33.96815107102593	0.0377677564825253	1			+	72	PoFV_scaffold_33452_1:2005-2787(+)								2005-2787	2005	2787		no	0.0	0.0	0.0	C
PoFV_scaffold_21671_orf001_putative_ATPase_(CDC48)_LbFV_ORF81	PoFV_scaffold_33452_1:2005-2787(+)	92.5	261	19	0	1	261	1	261	6.935e-165	507	262	261	1.0	0.996	Cluster454	PoFV_scaffold_33452_1:2005-2787(+)	scaffold_33452_1	0.305017921146953	31.9111111111111	3489.0	31.0	scaffold_33452_1	109	31.0	33.96815107102593	0.0377677564825253	1			+	72	PoFV_scaffold_33452_1:2005-2787(+)								2005-2787	2005	2787		no	0.0	0.0	0.0	C
PoFV_scaffold_49244_orf001	PoFV_scaffold_6401:20213-19599(-)	20.9	244	161	0	7	250	1	205	7.606e-11	60	275	205	1.0	0.887	Cluster454	PoFV_scaffold_6401:20213-19599(-)	scaffold_6401	0.390088787941359	32.7785165606674	24214.0	33.0	scaffold_6401	275	33.0	33.96815107102593	0.2068771138669673	1			-	92	PoFV_scaffold_6401:20213-19599(-)	PoFV_scaffold_6401:20213-19599(-)	scaffold_6401_ORF.67;19487-20267(-)	19487.0	20267.0	-		1.270358306188925	20213-19599	19599	20213	77.0	no	1.0	0.0	1.0	A
PoFV_scaffold_10252_orf006	PoFV_scaffold_22338:3694-4368(+)	77.4	230	51	0	1	230	1	225	3.019e-114	365	327	225	1.0	0.703	Cluster131	PoFV_scaffold_22338:3694-4368(+)	scaffold_22338	0.288181818181818	36.4319163446238	4399.0	37.0	scaffold_22338	597	37.0	33.96815107102593	0.0197294250281848	1			+	51	PoFV_scaffold_22338:3694-4368(+)								3694-4368	3694	4368		no	0.0	0.0	0.0	C
PoFV_scaffold_10252_orf006	PoFV_scaffold_39178:1770-2375(+)	68.3	210	64	0	1	210	1	202	8.674999999999999e-88	288	327	202	1.0	0.642	Cluster131	PoFV_scaffold_39178:1770-2375(+)	scaffold_39178	0.30294695481336	32.4162735849057	2544.0	33.0	scaffold_39178	597	33.0	33.96815107102593	0.2068771138669673	1			+	78	PoFV_scaffold_39178:1770-2375(+)	PoFV_scaffold_39178:1770-2375(+)	scaffold_39178_ORF.3;1709-2399(+)	1709.0	2399.0	-		1.140495867768595	1770-2375	1770	2375	68.0	no	0.0	0.0	0.0	C
PoFV_scaffold_10252_orf006	PoFV_scaffold_31167:4430-4083(-)	87.7	117	14	0	210	326	1	116	8.784e-63	216	327	116	1.0	0.358	Cluster131	PoFV_scaffold_31167:4430-4083(-)	scaffold_31167	0.285404937202252	23.4775828460039	4617.0	24.0	scaffold_31167	445	24.0	33.96815107102593	0.0	1			-	61	PoFV_scaffold_31167:4430-4083(-)	PoFV_scaffold_31167:4430-4083(-)	scaffold_31167_ORF.8;4082-4391(-)	4082.0	4391.0	-		0.8904899135446686	4430-4083	4083	4430	52.0	no	0.0	0.0	0.0	C
LbFV_YP_009345701.1	PoFV_scaffold_31167:4430-4083(-)	52.6	48	22	0	192	239	2	49	6.757e-08	51	290	116	0.414	0.166	Cluster131	PoFV_scaffold_31167:4430-4083(-)	scaffold_31167	0.285404937202252	23.4775828460039	4617.0	24.0	scaffold_31167	445	24.0	33.96815107102593	0.0	1			-	61	PoFV_scaffold_31167:4430-4083(-)	PoFV_scaffold_31167:4430-4083(-)	scaffold_31167_ORF.8;4082-4391(-)	4082.0	4391.0	-		0.8904899135446686	4430-4083	4083	4430	52.0	no	0.0	0.0	0.0	C
PoFV_scaffold_10252_orf006	PoFV_scaffold_983:21453-21136(-)	67.8	116	34	0	210	325	1	106	1.727e-43	159	327	106	1.0	0.355	Cluster131	PoFV_scaffold_983:21453-21136(-)	scaffold_983	0.312990207453474	33.4340016708438	21546.0	33.0	scaffold_983	123	33.0	33.96815107102593	0.2068771138669673	1			-	140	PoFV_scaffold_983:21453-21136(-)								21453-21136	21136	21453		no	0.0	0.0	0.0	C
PoFV_scaffold_10252_orf007	PoFV_scaffold_22338:1720-3465(+)	68.5	596	183	0	1	596	1	582	7.842e-265	815	597	582	1.0	0.998	Cluster379	PoFV_scaffold_22338:1720-3465(+)	scaffold_22338	0.288181818181818	36.4319163446238	4399.0	37.0	scaffold_22338	597	37.0	33.96815107102593	0.0197294250281848	1			+	50	PoFV_scaffold_22338:1720-3465(+)	PoFV_scaffold_22338:1720-3465(+)	scaffold_22338_ORF.1;1719-3465(+)	1719.0	3465.0	-		1.0005730659025789	1720-3465	1720	3465	42.0	no	0.0	0.0	0.0	C
PoFV_scaffold_10252_orf007	PoFV_scaffold_39178:127-1510(+)	59.0	133	54	0	1	133	1	133	1.462e-39	154	597	461	0.289	0.223	Cluster379	PoFV_scaffold_39178:127-1510(+)	scaffold_39178	0.30294695481336	32.4162735849057	2544.0	33.0	scaffold_39178	597	33.0	33.96815107102593	0.2068771138669673	2	6.0	2.0	+	77	PoFV_scaffold_39178:127-1510(+)	PoFV_scaffold_39178:127-1510(+)	scaffold_39178_ORF.1;78-531(+)	78.0	531.0	-		0.3275488069414317	127-1510	127	1510	67.0	yes	0.0	0.0	0.0	C
PoFV_scaffold_10252_orf008	PoFV_scaffold_22338:453-1694(+)	72.3	414	108	0	1	392	1	414	6.240999999999999e-196	604	393	414	1.0	0.997	Cluster807	PoFV_scaffold_22338:453-1694(+)	scaffold_22338	0.288181818181818	36.4319163446238	4399.0	37.0	scaffold_22338	597	37.0	33.96815107102593	0.0197294250281848	1			+	49	PoFV_scaffold_22338:453-1694(+)	PoFV_scaffold_22338:453-1694(+)	scaffold_22338_ORF.4;452-1694(+)	452.0	1694.0	-		1.000805801772764	453-1694	453	1694	41.0	no	0.0	0.0	0.0	C
PoFV_scaffold_10252_orf009	PoFV_scaffold_22338:59-316(+)	83.1	86	14	0	1	86	1	86	2.622e-44	150	87	86	1.0	0.989	Cluster633	PoFV_scaffold_22338:59-316(+)	scaffold_22338	0.288181818181818	36.4319163446238	4399.0	37.0	scaffold_22338	597	37.0	33.96815107102593	0.0197294250281848	1			+	48	PoFV_scaffold_22338:59-316(+)	PoFV_scaffold_22338:59-316(+)	scaffold_22338_ORF.2;58-316(+)	58.0	316.0	-		1.0038910505836576	59-316	59	316	40.0	no	0.0	0.0	0.0	C
PoFV_scaffold_10252_orf002	PoFV_scaffold_31167:1569-2844(+)	58.9	195	77	0	28	215	1	195	4.511e-64	224	445	425	0.459	0.422	Cluster419	PoFV_scaffold_31167:1569-2844(+)	scaffold_31167	0.285404937202252	23.4775828460039	4617.0	24.0	scaffold_31167	445	24.0	33.96815107102593	0.0	2	1.0	1.0	+	59	PoFV_scaffold_31167:1569-2844(+)	PoFV_scaffold_31167:1569-2844(+)	scaffold_31167_ORF.5;1862-2117(+)	1862.0	2117.0	-		0.2	1569-2844	1569	2844	50.0	yes	0.0	0.0	0.0	C
PoFV_scaffold_10252_orf002	PoFV_scaffold_983:18924-19883(+)	65.3	341	111	0	103	443	1	320	1.418e-138	441	445	320	1.0	0.766	Cluster419	PoFV_scaffold_983:18924-19883(+)	scaffold_983	0.312990207453474	33.4340016708438	21546.0	33.0	scaffold_983	123	33.0	33.96815107102593	0.2068771138669673	1			+	138	PoFV_scaffold_983:18924-19883(+)	PoFV_scaffold_983:18924-19883(+)	scaffold_983_ORF.23;18998-19892(+)	18998.0	19892.0	-		0.9322210636079248	18924-19883	18924	19883	114.0	no	0.0	0.0	0.0	C
PoFV_scaffold_10252_orf001	PoFV_scaffold_31167:1255-510(-)	87.6	77	9	0	1	77	1	77	6.694e-39	143	250	248	0.31	0.308	Cluster1245	PoFV_scaffold_31167:1255-510(-)	scaffold_31167	0.285404937202252	23.4775828460039	4617.0	24.0	scaffold_31167	445	24.0	33.96815107102593	0.0	2			-	58	PoFV_scaffold_31167:1255-510(-)	PoFV_scaffold_31167:1255-510(-)	scaffold_31167_ORF.12;1000-1255(-)	1000.0	1255.0	-		0.3422818791946309	1255-510	510	1255	49.0	yes	0.0	0.0	0.0	C
PoFV_scaffold_10252_orf001	PoFV_scaffold_983:18563-17811(-)	68.0	251	79	0	3	249	1	251	8.904e-108	342	250	251	1.0	0.988	Cluster1245	PoFV_scaffold_983:18563-17811(-)	scaffold_983	0.312990207453474	33.4340016708438	21546.0	33.0	scaffold_983	123	33.0	33.96815107102593	0.2068771138669673	1			-	137	PoFV_scaffold_983:18563-17811(-)	PoFV_scaffold_983:18563-17811(-)	scaffold_983_ORF.29;17810-18614(-)	17810.0	18614.0	-		1.069148936170213	18563-17811	17811	18563	113.0	no	0.0	0.0	0.0	C
PoFV_scaffold_10252_orf005	PoFV_scaffold_31167:3708-4058(+)	85.7	117	17	0	11	127	1	117	1.855e-64	210	128	117	1.0	0.914	Cluster1417	PoFV_scaffold_31167:3708-4058(+)	scaffold_31167	0.285404937202252	23.4775828460039	4617.0	24.0	scaffold_31167	445	24.0	33.96815107102593	0.0	1			+	60	PoFV_scaffold_31167:3708-4058(+)	PoFV_scaffold_31167:3708-4058(+)	scaffold_31167_ORF.6;3695-4058(+)	3695.0	4058.0	-		1.0371428571428571	3708-4058	3708	4058	51.0	no	0.0	0.0	0.0	C
PoFV_scaffold_10252_orf005	PoFV_scaffold_983:20719-21069(+)	62.5	117	44	0	2	118	1	117	4.281000000000001e-42	146	128	117	1.0	0.914	Cluster1417	PoFV_scaffold_983:20719-21069(+)	scaffold_983	0.312990207453474	33.4340016708438	21546.0	33.0	scaffold_983	123	33.0	33.96815107102593	0.2068771138669673	1			+	139	PoFV_scaffold_983:20719-21069(+)	PoFV_scaffold_983:20719-21069(+)	scaffold_983_ORF.7;20712-21078(+)	20712.0	21078.0	-		1.0457142857142858	20719-21069	20719	21069	115.0	no	0.0	0.0	0.0	C
PoFV_scaffold_2702_orf011	PoFV_scaffold_983:2393-1082(-)	62.7	148	54	0	4	149	1	148	2.346e-50	184	469	437	0.339	0.311	Cluster427	PoFV_scaffold_983:2393-1082(-)	scaffold_983	0.312990207453474	33.4340016708438	21546.0	33.0	scaffold_983	123	33.0	33.96815107102593	0.2068771138669673	4	70.0	29.0	-	128	PoFV_scaffold_983:2393-1082(-)	PoFV_scaffold_983:2393-1082(-)	scaffold_983_ORF.35;2009-2408(-)	2009.0	2408.0	-		0.3043478260869565	2393-1082	1082	2393	104.0	yes	0.0	0.0	0.0	C
PoFV_scaffold_2702_orf011	PoFV_scaffold_983:2393-1082(-)	62.7	148	54	0	4	149	1	148	2.346e-50	184	469	437	0.339	0.311	Cluster427	PoFV_scaffold_983:2393-1082(-)	scaffold_983	0.312990207453474	33.4340016708438	21546.0	33.0	scaffold_983	123	33.0	33.96815107102593	0.2068771138669673	4	70.0	29.0	-	128	PoFV_scaffold_983:2393-1082(-)	PoFV_scaffold_983:2393-1082(-)	scaffold_983_ORF.36;1100-1256(-)	1100.0	1256.0	-		0.1189931350114416	2393-1082	1082	2393	103.0	yes	0.0	0.0	0.0	C
PoFV_scaffold_2702_orf011	PoFV_scaffold_7821:4773-3391(-)	83.5	467	76	0	1	467	1	461	2.636e-264	806	469	461	1.0	0.996	Cluster427	PoFV_scaffold_7821:4773-3391(-)	scaffold_7821	0.31157978511739	32.6687669960868	15077.0	33.0	scaffold_7821	123	33.0	33.96815107102593	0.2068771138669673	1			-	107	PoFV_scaffold_7821:4773-3391(-)	PoFV_scaffold_7821:4773-3391(-)	scaffold_7821_ORF.31;3390-4773(-)	3390.0	4773.0	-		1.0007235890014472	4773-3391	3391	4773	87.0	no	0.0	0.0	0.0	C
LbFV_YP_009345623.1	PoFV_scaffold_983:9781-10272(+)	32.9	163	107	0	58	220	3	163	1.6270000000000002e-20	88	226	164	0.982	0.721	Cluster85	PoFV_scaffold_983:9781-10272(+)	scaffold_983	0.312990207453474	33.4340016708438	21546.0	33.0	scaffold_983	123	33.0	33.96815107102593	0.2068771138669673	1			+	131	PoFV_scaffold_983:9781-10272(+)	PoFV_scaffold_983:9781-10272(+)	scaffold_983_ORF.3;9849-10272(+)	9849.0	10272.0	-		0.8615071283095723	9781-10272	9781	10272	109.0	no	0.0	0.0	0.0	C
DFV_QKN22470.1	PoFV_scaffold_983:9781-10272(+)	31.9	161	108	0	72	231	3	163	1.18e-18	83	238	164	0.982	0.672	Cluster85	PoFV_scaffold_983:9781-10272(+)	scaffold_983	0.312990207453474	33.4340016708438	21546.0	33.0	scaffold_983	123	33.0	33.96815107102593	0.2068771138669673	1			+	131	PoFV_scaffold_983:9781-10272(+)	PoFV_scaffold_983:9781-10272(+)	scaffold_983_ORF.3;9849-10272(+)	9849.0	10272.0	-		0.8615071283095723	9781-10272	9781	10272	109.0	no	0.0	0.0	0.0	C
PoFV_scaffold_2702_orf008	PoFV_scaffold_983:9781-10272(+)	80.1	167	32	0	43	209	1	164	7.702e-86	276	210	164	1.0	0.795	Cluster85	PoFV_scaffold_983:9781-10272(+)	scaffold_983	0.312990207453474	33.4340016708438	21546.0	33.0	scaffold_983	123	33.0	33.96815107102593	0.2068771138669673	1			+	131	PoFV_scaffold_983:9781-10272(+)	PoFV_scaffold_983:9781-10272(+)	scaffold_983_ORF.3;9849-10272(+)	9849.0	10272.0	-		0.8615071283095723	9781-10272	9781	10272	109.0	no	0.0	0.0	0.0	C
LbFV_YP_009345623.1	PoFV_scaffold_7821:12565-13134(+)	39.9	131	74	0	52	175	44	174	2.977e-22	93	226	190	0.689	0.549	Cluster85	PoFV_scaffold_7821:12565-13134(+)	scaffold_7821	0.31157978511739	32.6687669960868	15077.0	33.0	scaffold_7821	123	33.0	33.96815107102593	0.2068771138669673	1			+	110	PoFV_scaffold_7821:12565-13134(+)	PoFV_scaffold_7821:12565-13134(+)	scaffold_7821_ORF.2;12564-13134(+)	12564.0	13134.0	-		1.0017574692442883	12565-13134	12565	13134	90.0	no	0.0	0.0	0.0	C
A0A076FCA4_PmNV	PoFV_scaffold_7821:12565-13134(+)	25.1	157	112	0	120	276	36	186	2.017e-09	55	283	190	0.795	0.555	Cluster85	PoFV_scaffold_7821:12565-13134(+)	scaffold_7821	0.31157978511739	32.6687669960868	15077.0	33.0	scaffold_7821	123	33.0	33.96815107102593	0.2068771138669673	1			+	110	PoFV_scaffold_7821:12565-13134(+)	PoFV_scaffold_7821:12565-13134(+)	scaffold_7821_ORF.2;12564-13134(+)	12564.0	13134.0	-		1.0017574692442883	12565-13134	12565	13134	90.0	no	0.0	0.0	0.0	C
DFV_QKN22470.1	PoFV_scaffold_7821:12565-13134(+)	39.1	119	69	0	72	185	50	168	1.18e-18	83	238	190	0.626	0.479	Cluster85	PoFV_scaffold_7821:12565-13134(+)	scaffold_7821	0.31157978511739	32.6687669960868	15077.0	33.0	scaffold_7821	123	33.0	33.96815107102593	0.2068771138669673	1			+	110	PoFV_scaffold_7821:12565-13134(+)	PoFV_scaffold_7821:12565-13134(+)	scaffold_7821_ORF.2;12564-13134(+)	12564.0	13134.0	-		1.0017574692442883	12565-13134	12565	13134	90.0	no	0.0	0.0	0.0	C
PoFV_scaffold_2702_orf008	PoFV_scaffold_7821:12565-13134(+)	82.8	190	32	0	1	185	1	190	4.334000000000001e-103	326	210	190	1.0	0.881	Cluster85	PoFV_scaffold_7821:12565-13134(+)	scaffold_7821	0.31157978511739	32.6687669960868	15077.0	33.0	scaffold_7821	123	33.0	33.96815107102593	0.2068771138669673	1			+	110	PoFV_scaffold_7821:12565-13134(+)	PoFV_scaffold_7821:12565-13134(+)	scaffold_7821_ORF.2;12564-13134(+)	12564.0	13134.0	-		1.0017574692442883	12565-13134	12565	13134	90.0	no	0.0	0.0	0.0	C
PoFV_scaffold_2702_orf010	PoFV_scaffold_983:2616-7659(+)	35.1	1346	850	0	24	1369	1	1310	1.929e-231	767	1750	1681	0.779	0.769	Cluster183	PoFV_scaffold_983:2616-7659(+)	scaffold_983	0.312990207453474	33.4340016708438	21546.0	33.0	scaffold_983	123	33.0	33.96815107102593	0.2068771138669673	5	0.0	28.0	+	129	PoFV_scaffold_983:2616-7659(+)	PoFV_scaffold_983:2616-7659(+)	scaffold_983_ORF.15;4742-6545(+)	4742.0	6545.0	-		0.3575252825698988	2616-7659	2616	7659	107.0	yes	0.0	0.0	0.0	C
PoFV_scaffold_2702_orf010	PoFV_scaffold_983:2616-7659(+)	35.1	1346	850	0	24	1369	1	1310	1.929e-231	767	1750	1681	0.779	0.769	Cluster183	PoFV_scaffold_983:2616-7659(+)	scaffold_983	0.312990207453474	33.4340016708438	21546.0	33.0	scaffold_983	123	33.0	33.96815107102593	0.2068771138669673	5	0.0	28.0	+	129	PoFV_scaffold_983:2616-7659(+)	PoFV_scaffold_983:2616-7659(+)	scaffold_983_ORF.13;2558-2921(+)	2558.0	2921.0	-		0.0719809637120761	2616-7659	2616	7659	105.0	yes	0.0	0.0	0.0	C
PoFV_scaffold_2702_orf010	PoFV_scaffold_983:2616-7659(+)	35.1	1346	850	0	24	1369	1	1310	1.929e-231	767	1750	1681	0.779	0.769	Cluster183	PoFV_scaffold_983:2616-7659(+)	scaffold_983	0.312990207453474	33.4340016708438	21546.0	33.0	scaffold_983	123	33.0	33.96815107102593	0.2068771138669673	5	0.0	28.0	+	129	PoFV_scaffold_983:2616-7659(+)	PoFV_scaffold_983:2616-7659(+)	scaffold_983_ORF.14;3005-3173(+)	3005.0	3173.0	-		0.0333135038667459	2616-7659	2616	7659	106.0	yes	0.0	0.0	0.0	C
PoFV_scaffold_2702_orf010	PoFV_scaffold_7821:4964-10252(+)	80.8	1763	335	0	1	1748	1	1763	0.0	2921	1750	1763	1.0	0.999	Cluster183	PoFV_scaffold_7821:4964-10252(+)	scaffold_7821	0.31157978511739	32.6687669960868	15077.0	33.0	scaffold_7821	123	33.0	33.96815107102593	0.2068771138669673	1			+	108	PoFV_scaffold_7821:4964-10252(+)	PoFV_scaffold_7821:4964-10252(+)	scaffold_7821_ORF.8;4933-10333(+)	4933.0	10333.0	-		1.021180030257186	4964-10252	4964	10252	88.0	no	0.0	0.0	0.0	C
PoFV_scaffold_2702_orf006	PoFV_scaffold_983:13861-14181(+)	71.3	108	30	0	12	119	1	107	3.834e-45	157	177	107	1.0	0.61	Cluster445	PoFV_scaffold_983:13861-14181(+)	scaffold_983	0.312990207453474	33.4340016708438	21546.0	33.0	scaffold_983	123	33.0	33.96815107102593	0.2068771138669673	2	1.0	25.0	+	133	PoFV_scaffold_983:13861-14181(+)								13861-14181	13861	14181		yes	0.0	0.0	0.0	C
PoFV_scaffold_2702_orf006	PoFV_scaffold_7821:13822-14337(+)	81.6	175	31	0	1	175	1	172	3.311e-93	296	177	172	1.0	0.989	Cluster445	PoFV_scaffold_7821:13822-14337(+)	scaffold_7821	0.31157978511739	32.6687669960868	15077.0	33.0	scaffold_7821	123	33.0	33.96815107102593	0.2068771138669673	1			+	112	PoFV_scaffold_7821:13822-14337(+)	PoFV_scaffold_7821:13822-14337(+)	scaffold_7821_ORF.3;13368-14340(+)	13368.0	14340.0	-		1.887378640776699	13822-14337	13822	14337	91.0	no	0.0	0.0	0.0	C
PoFV_scaffold_2702_orf009	PoFV_scaffold_983:7792-9634(+)	63.9	227	78	0	1	227	1	218	9.004e-83	287	664	614	0.355	0.342	Cluster1248	PoFV_scaffold_983:7792-9634(+)	scaffold_983	0.312990207453474	33.4340016708438	21546.0	33.0	scaffold_983	123	33.0	33.96815107102593	0.2068771138669673	2	1.0	27.0	+	130	PoFV_scaffold_983:7792-9634(+)	PoFV_scaffold_983:7792-9634(+)	scaffold_983_ORF.2;7917-8379(+)	7917.0	8379.0	-		0.250814332247557	7792-9634	7792	9634	108.0	yes	0.0	0.0	0.0	C
PoFV_scaffold_2702_orf009	PoFV_scaffold_7821:10526-12512(+)	80.7	229	44	0	1	229	1	229	2.1249999999999998e-114	381	664	662	0.346	0.345	Cluster1248	PoFV_scaffold_7821:10526-12512(+)	scaffold_7821	0.31157978511739	32.6687669960868	15077.0	33.0	scaffold_7821	123	33.0	33.96815107102593	0.2068771138669673	2	5.0	26.0	+	109	PoFV_scaffold_7821:10526-12512(+)	PoFV_scaffold_7821:10526-12512(+)	scaffold_7821_ORF.9;10525-11158(+)	10525.0	11158.0	-		0.3187311178247734	10526-12512	10526	12512	89.0	yes	0.0	0.0	0.0	C
PoFV_scaffold_2702_orf007	PoFV_scaffold_983:13419-13760(+)	74.8	114	28	0	2	115	1	114	1.739e-52	175	123	114	1.0	0.927	Cluster407	PoFV_scaffold_983:13419-13760(+)	scaffold_983	0.312990207453474	33.4340016708438	21546.0	33.0	scaffold_983	123	33.0	33.96815107102593	0.2068771138669673	1			+	132	PoFV_scaffold_983:13419-13760(+)	PoFV_scaffold_983:13419-13760(+)	scaffold_983_ORF.19;13406-13763(+)	13406.0	13763.0	-		1.0469208211143697	13419-13760	13419	13760	110.0	no	0.0	0.0	0.0	C
PoFV_scaffold_2702_orf007	PoFV_scaffold_7821:13369-13734(+)	84.4	122	19	0	1	122	1	122	2.405e-66	215	123	122	1.0	0.992	Cluster407	PoFV_scaffold_7821:13369-13734(+)	scaffold_7821	0.31157978511739	32.6687669960868	15077.0	33.0	scaffold_7821	123	33.0	33.96815107102593	0.2068771138669673	1			+	111	PoFV_scaffold_7821:13369-13734(+)	PoFV_scaffold_7821:13369-13734(+)	scaffold_7821_ORF.3;13368-14340(+)	13368.0	14340.0	-		2.663013698630137	13369-13734	13369	13734	91.0	no	0.0	0.0	0.0	C
PoFV_scaffold_18896_orf006	PoFV_scaffold_33352:3905-3279(-)	87.1	211	27	0	1	211	1	209	6.924e-123	383	213	209	1.0	0.991	Cluster229	PoFV_scaffold_33352:3905-3279(-)	scaffold_33352	0.301872372946122	31.0940187273075	5233.0	32.0	scaffold_33352	213	32.0	33.96815107102593	0.0935738444193912	1			-	68	PoFV_scaffold_33352:3905-3279(-)	PoFV_scaffold_33352:3905-3279(-)	scaffold_33352_ORF.8;3269-3905(-)	3269.0	3905.0	-		1.0159744408945688	3905-3279	3279	3905	59.0	no	0.0	0.0	0.0	C
PoFV_scaffold_18896_orf002	PoFV_scaffold_33352:1039-379(-)	84.9	116	17	0	21	136	1	116	6.676e-61	206	243	220	0.527	0.477	Cluster227	PoFV_scaffold_33352:1039-379(-)	scaffold_33352	0.301872372946122	31.0940187273075	5233.0	32.0	scaffold_33352	213	32.0	33.96815107102593	0.0935738444193912	2	70.0	11.0	-	64	PoFV_scaffold_33352:1039-379(-)	PoFV_scaffold_33352:1039-379(-)	scaffold_33352_ORF.6;646-1030(-)	646.0	1030.0	-		0.5818181818181818	1039-379	379	1039	55.0	yes	0.0	0.0	0.0	C
PoFV_scaffold_18896_orf005	PoFV_scaffold_33352:2981-2811(-)	47.4	57	29	0	10	66	1	57	1.037e-10	53	73	57	1.0	0.781	Cluster1280	PoFV_scaffold_33352:2981-2811(-)	scaffold_33352	0.301872372946122	31.0940187273075	5233.0	32.0	scaffold_33352	213	32.0	33.96815107102593	0.0935738444193912	1			-	67	PoFV_scaffold_33352:2981-2811(-)								2981-2811	2811	2981		no	0.0	0.0	0.0	C
PoFV_scaffold_7638_orf014	PoFV_scaffold_8315:393-1520(+)	82.1	376	67	0	1	375	1	376	1.849e-207	637	377	376	1.0	0.995	Cluster417	PoFV_scaffold_8315:393-1520(+)	scaffold_8315	0.301560912533481	32.7433955292814	10826.0	32.0	scaffold_8315	130	32.0	33.96815107102593	0.0935738444193912	1			+	114	PoFV_scaffold_8315:393-1520(+)	PoFV_scaffold_8315:393-1520(+)	scaffold_8315_ORF.12;392-1523(+)	392.0	1523.0	-		1.0035492457852706	393-1520	393	1520	92.0	no	0.0	0.0	0.0	C
PoFV_scaffold_7638_orf014	PoFV_scaffold_28968:2322-1930(-)	71.0	131	37	0	1	128	1	131	4.978e-53	189	377	131	1.0	0.34	Cluster417	PoFV_scaffold_28968:2322-1930(-)	scaffold_28968	0.309888169511477	27.6373270532823	3397.0	28.0	scaffold_28968	377	28.0	33.96815107102593	0.0005636978579481	1			-	55	PoFV_scaffold_28968:2322-1930(-)	PoFV_scaffold_28968:2322-1930(-)	scaffold_28968_ORF.5;1923-2322(-)	1923.0	2322.0	-		1.0178571428571428	2322-1930	1930	2322	47.0	no	0.0	0.0	0.0	C
AKY03128_AmFV	PoFV_scaffold_8315:2362-4617(+)	20.3	250	148	0	336	585	257	443	3.424e-09	58	1058	752	0.249	0.236	Cluster192	PoFV_scaffold_8315:2362-4617(+)	scaffold_8315	0.301560912533481	32.7433955292814	10826.0	32.0	scaffold_8315	130	32.0	33.96815107102593	0.0935738444193912	1			+	116	PoFV_scaffold_8315:2362-4617(+)	PoFV_scaffold_8315:2362-4617(+)	scaffold_8315_ORF.2;2361-4617(+)	2361.0	4617.0	-		1.0004434589800444	2362-4617	2362	4617	93.0	no	0.0	0.0	0.0	C
PoFV_scaffold_7638_orf012	PoFV_scaffold_8315:2362-4617(+)	75.7	753	182	0	1	753	1	752	0.0	1158	754	752	1.0	0.999	Cluster192	PoFV_scaffold_8315:2362-4617(+)	scaffold_8315	0.301560912533481	32.7433955292814	10826.0	32.0	scaffold_8315	130	32.0	33.96815107102593	0.0935738444193912	1			+	116	PoFV_scaffold_8315:2362-4617(+)	PoFV_scaffold_8315:2362-4617(+)	scaffold_8315_ORF.2;2361-4617(+)	2361.0	4617.0	-		1.0004434589800444	2362-4617	2362	4617	93.0	no	0.0	0.0	0.0	C
DFV_QKN22506.1	PoFV_scaffold_8315:2362-4617(+)	27.7	255	176	0	176	430	252	496	2.266e-23	104	727	752	0.326	0.351	Cluster192	PoFV_scaffold_8315:2362-4617(+)	scaffold_8315	0.301560912533481	32.7433955292814	10826.0	32.0	scaffold_8315	130	32.0	33.96815107102593	0.0935738444193912	1			+	116	PoFV_scaffold_8315:2362-4617(+)	PoFV_scaffold_8315:2362-4617(+)	scaffold_8315_ORF.2;2361-4617(+)	2361.0	4617.0	-		1.0004434589800444	2362-4617	2362	4617	93.0	no	0.0	0.0	0.0	C
B2YG06_MdSGHV	PoFV_scaffold_8315:2362-4617(+)	21.1	318	217	0	74	349	134	451	9.647e-16	78	645	752	0.423	0.428	Cluster192	PoFV_scaffold_8315:2362-4617(+)	scaffold_8315	0.301560912533481	32.7433955292814	10826.0	32.0	scaffold_8315	130	32.0	33.96815107102593	0.0935738444193912	1			+	116	PoFV_scaffold_8315:2362-4617(+)	PoFV_scaffold_8315:2362-4617(+)	scaffold_8315_ORF.2;2361-4617(+)	2361.0	4617.0	-		1.0004434589800444	2362-4617	2362	4617	93.0	no	0.0	0.0	0.0	C
B0YLQ6_GpSGHV	PoFV_scaffold_8315:2362-4617(+)	23.8	264	177	0	150	382	203	466	4.633e-17	83	653	752	0.351	0.357	Cluster192	PoFV_scaffold_8315:2362-4617(+)	scaffold_8315	0.301560912533481	32.7433955292814	10826.0	32.0	scaffold_8315	130	32.0	33.96815107102593	0.0935738444193912	1			+	116	PoFV_scaffold_8315:2362-4617(+)	PoFV_scaffold_8315:2362-4617(+)	scaffold_8315_ORF.2;2361-4617(+)	2361.0	4617.0	-		1.0004434589800444	2362-4617	2362	4617	93.0	no	0.0	0.0	0.0	C
LbFV_YP_009345636.1	PoFV_scaffold_8315:2362-4617(+)	28.1	126	88	0	205	327	371	496	1.77e-08	54	561	752	0.168	0.219	Cluster192	PoFV_scaffold_8315:2362-4617(+)	scaffold_8315	0.301560912533481	32.7433955292814	10826.0	32.0	scaffold_8315	130	32.0	33.96815107102593	0.0935738444193912	1			+	116	PoFV_scaffold_8315:2362-4617(+)	PoFV_scaffold_8315:2362-4617(+)	scaffold_8315_ORF.2;2361-4617(+)	2361.0	4617.0	-		1.0004434589800444	2362-4617	2362	4617	93.0	no	0.0	0.0	0.0	C
PoFV_scaffold_7638_orf005	PoFV_scaffold_8315:10729-10394(-)	94.2	112	6	0	271	379	1	112	1.116e-64	224	381	112	1.0	0.286	Cluster63	PoFV_scaffold_8315:10729-10394(-)	scaffold_8315	0.301560912533481	32.7433955292814	10826.0	32.0	scaffold_8315	130	32.0	33.96815107102593	0.0935738444193912	1			-	123	PoFV_scaffold_8315:10729-10394(-)								10729-10394	10394	10729		no	0.0	0.0	0.0	C
PoFV_scaffold_7638_orf005	PoFV_scaffold_75772:1153-689(-)	81.8	155	26	0	232	377	1	155	3.3540000000000004e-78	263	381	155	1.0	0.383	Cluster63	PoFV_scaffold_75772:1153-689(-)	scaffold_75772	0.324388789505069	27.2303102625298	1676.0	28.0	scaffold_75772	302	28.0	33.96815107102593	0.0005636978579481	1			-	103	PoFV_scaffold_75772:1153-689(-)	PoFV_scaffold_75772:1153-689(-)	scaffold_75772_ORF.4;682-1066(-)	682.0	1066.0	-		0.8275862068965517	1153-689	689	1153	85.0	no	0.0	0.0	0.0	C
LbFV_YP_009345656.1	PoFV_scaffold_75772:1153-689(-)	31.4	155	97	0	1	155	220	362	4.37e-18	78	373	155	1.0	0.383	Cluster63	PoFV_scaffold_75772:1153-689(-)	scaffold_75772	0.324388789505069	27.2303102625298	1676.0	28.0	scaffold_75772	302	28.0	33.96815107102593	0.0005636978579481	1			-	103	PoFV_scaffold_75772:1153-689(-)	PoFV_scaffold_75772:1153-689(-)	scaffold_75772_ORF.4;682-1066(-)	682.0	1066.0	-		0.8275862068965517	1153-689	689	1153	85.0	no	0.0	0.0	0.0	C
PoFV_scaffold_7638_orf010	PoFV_scaffold_8315:6633-7148(+)	79.1	179	36	0	17	195	1	172	1.869e-91	292	196	172	1.0	0.913	Cluster444	PoFV_scaffold_8315:6633-7148(+)	scaffold_8315	0.301560912533481	32.7433955292814	10826.0	32.0	scaffold_8315	130	32.0	33.96815107102593	0.0935738444193912	1			+	118	PoFV_scaffold_8315:6633-7148(+)	PoFV_scaffold_8315:6633-7148(+)	scaffold_8315_ORF.15;6197-7160(+)	6197.0	7160.0	-		1.8699029126213595	6633-7148	6633	7148	95.0	no	0.0	0.0	0.0	C
PoFV_scaffold_7638_orf010	PoFV_scaffold_11969:699-178(-)	66.7	178	58	0	17	194	1	174	1.069e-72	238	196	174	1.0	0.908	Cluster444	PoFV_scaffold_11969:699-178(-)	scaffold_11969	0.343460685878211	33.8097535532664	7669.0	34.0	scaffold_11969	196	34.0	33.96815107102593	0.3534385569334836	1			-	14	PoFV_scaffold_11969:699-178(-)	PoFV_scaffold_11969:699-178(-)	scaffold_11969_ORF.13;168-642(-)	168.0	642.0	-		0.90978886756238	699-178	178	699	13.0	no	0.0	0.0	0.0	C
PoFV_scaffold_7638_orf010	PoFV_scaffold_44098:2959-2447(-)	65.3	178	59	0	17	194	1	171	8.812e-71	232	196	171	1.0	0.908	Cluster444	PoFV_scaffold_44098:2959-2447(-)	scaffold_44098	0.305243759423689	30.2637399463807	5968.0	31.0	scaffold_44098	105	31.0	33.96815107102593	0.0377677564825253	1			-	81	PoFV_scaffold_44098:2959-2447(-)	PoFV_scaffold_44098:2959-2447(-)	scaffold_44098_ORF.8;2437-3046(-)	2437.0	3046.0	-		1.189453125	2959-2447	2447	2959	70.0	no	0.0	0.0	0.0	C
PoFV_scaffold_7638_orf013	PoFV_scaffold_8315:1594-2358(+)	82.7	261	44	0	18	278	1	255	1.8270000000000002e-143	447	279	255	1.0	0.935	Cluster919	PoFV_scaffold_8315:1594-2358(+)	scaffold_8315	0.301560912533481	32.7433955292814	10826.0	32.0	scaffold_8315	130	32.0	33.96815107102593	0.0935738444193912	1			+	115	PoFV_scaffold_8315:1594-2358(+)	PoFV_scaffold_8315:1594-2358(+)	scaffold_8315_ORF.1;1512-2358(+)	1512.0	2358.0	-		1.1073298429319371	1594-2358	1594	2358	92.0	no	0.0	0.0	0.0	C
PoFV_scaffold_7638_orf008	PoFV_scaffold_8315:8120-8857(+)	79.1	250	51	0	1	250	1	246	9.577e-130	406	267	246	1.0	0.936	Cluster360	PoFV_scaffold_8315:8120-8857(+)	scaffold_8315	0.301560912533481	32.7433955292814	10826.0	32.0	scaffold_8315	130	32.0	33.96815107102593	0.0935738444193912	1			+	120	PoFV_scaffold_8315:8120-8857(+)	PoFV_scaffold_8315:8120-8857(+)	scaffold_8315_ORF.8;7969-8905(+)	7969.0	8905.0	-		1.2700135685210312	8120-8857	8120	8857	97.0	no	0.0	0.0	0.0	C
PoFV_scaffold_7638_orf009	PoFV_scaffold_8315:7451-7293(-)	88.1	53	6	0	1	53	1	53	1.504e-27	100	54	53	1.0	0.981	Cluster406	PoFV_scaffold_8315:7451-7293(-)	scaffold_8315	0.301560912533481	32.7433955292814	10826.0	32.0	scaffold_8315	130	32.0	33.96815107102593	0.0935738444193912	1			-	119	PoFV_scaffold_8315:7451-7293(-)	PoFV_scaffold_8315:7451-7293(-)	scaffold_8315_ORF.16;7292-7451(-)	7292.0	7451.0	-		1.0063291139240509	7451-7293	7293	7451	96.0	no	0.0	0.0	0.0	C
PoFV_scaffold_7638_orf009	PoFV_scaffold_44098:895-1050(+)	80.2	52	10	0	1	52	1	52	1.4989999999999998e-23	88	54	52	1.0	0.963	Cluster406	PoFV_scaffold_44098:895-1050(+)	scaffold_44098	0.305243759423689	30.2637399463807	5968.0	31.0	scaffold_44098	105	31.0	33.96815107102593	0.0377677564825253	1			+	80	PoFV_scaffold_44098:895-1050(+)	PoFV_scaffold_44098:895-1050(+)	scaffold_44098_ORF.1;894-1053(+)	894.0	1053.0	-		1.0258064516129033	895-1050	895	1050	69.0	no	0.0	0.0	0.0	C
PoFV_scaffold_7638_orf007	PoFV_scaffold_8315:8927-9343(+)	77.4	139	29	0	1	129	1	139	2.144e-68	222	130	139	1.0	0.992	Cluster1263	PoFV_scaffold_8315:8927-9343(+)	scaffold_8315	0.301560912533481	32.7433955292814	10826.0	32.0	scaffold_8315	130	32.0	33.96815107102593	0.0935738444193912	1			+	121	PoFV_scaffold_8315:8927-9343(+)	PoFV_scaffold_8315:8927-9343(+)	scaffold_8315_ORF.9;8926-9343(+)	8926.0	9343.0	-		1.0024038461538465	8927-9343	8927	9343	98.0	no	0.0	0.0	0.0	C
PoFV_scaffold_7638_orf007	PoFV_scaffold_195108:562-239(-)	61.2	108	38	0	32	129	1	108	4.064e-37	132	130	108	1.0	0.754	Cluster1263	PoFV_scaffold_195108:562-239(-)	scaffold_195108	0.249557522123894	26.2748226950355	564.0	25.0	scaffold_195108	130	25.0	33.96815107102593	0.0	1			-	38	PoFV_scaffold_195108:562-239(-)	PoFV_scaffold_195108:562-239(-)	scaffold_195108_ORF.1;238-481(-)	238.0	481.0	-		0.7523219814241486	562-239	239	562	34.0	no	0.0	0.0	0.0	C
PoFV_scaffold_1254_orf014	PoFV_scaffold_204430:417-515(+)	74.0	33	8	0	18	50	1	33	8.927e-11	52	63	33	1.0	0.524	Cluster298	PoFV_scaffold_204430:417-515(+)	scaffold_204430	0.226843100189036	25.0795454545455	528.0	22.0	scaffold_204430	89	22.0	33.96815107102593	0.0	1			+	47	PoFV_scaffold_204430:417-515(+)								417-515	417	515		no	0.0	0.0	0.0	C
PoFV_scaffold_64266_orf002	PoFV_scaffold_204430:239-325(+)	86.5	29	4	0	60	88	1	29	4.26e-11	55	89	29	1.0	0.326	Cluster576	PoFV_scaffold_204430:239-325(+)	scaffold_204430	0.226843100189036	25.0795454545455	528.0	22.0	scaffold_204430	89	22.0	33.96815107102593	0.0	1			+	46	PoFV_scaffold_204430:239-325(+)								239-325	239	325		no	0.0	0.0	0.0	C
PoFV_scaffold_21671_orf004	PoFV_scaffold_33452_1:865-44(-)	55.0	274	119	0	1	266	1	274	5.073e-82	288	765	274	1.0	0.348	Cluster184	PoFV_scaffold_33452_1:865-44(-)	scaffold_33452_1	0.305017921146953	31.9111111111111	3489.0	31.0	scaffold_33452_1	109	31.0	33.96815107102593	0.0377677564825253	1			-	69	PoFV_scaffold_33452_1:865-44(-)								865-44	44	865		no	0.0	0.0	0.0	C
PoFV_scaffold_21671_orf003	PoFV_scaffold_33452_1:917-1240(+)	88.6	108	12	0	1	108	1	108	7.791e-62	201	109	108	1.0	0.991	Cluster1265	PoFV_scaffold_33452_1:917-1240(+)	scaffold_33452_1	0.305017921146953	31.9111111111111	3489.0	31.0	scaffold_33452_1	109	31.0	33.96815107102593	0.0377677564825253	1			+	70	PoFV_scaffold_33452_1:917-1240(+)	PoFV_scaffold_33452_1:917-1240(+)	scaffold_33452_1_ORF.2;916-1240(+)	916.0	1240.0	-		1.0030959752321982	917-1240	917	1240	60.0	no	0.0	0.0	0.0	C
PoFV_scaffold_21671_orf002	PoFV_scaffold_33452_1:1283-1792(+)	88.4	170	20	0	1	170	1	170	6.605e-100	315	171	170	1.0	0.994	Cluster671	PoFV_scaffold_33452_1:1283-1792(+)	scaffold_33452_1	0.305017921146953	31.9111111111111	3489.0	31.0	scaffold_33452_1	109	31.0	33.96815107102593	0.0377677564825253	1			+	71	PoFV_scaffold_33452_1:1283-1792(+)	PoFV_scaffold_33452_1:1283-1792(+)	scaffold_33452_1_ORF.3;1282-1792(+)	1282.0	1792.0	-		1.0019646365422397	1283-1792	1283	1792	61.0	no	0.0	0.0	0.0	C
PoFV_scaffold_1254_orf004	PoFV_scaffold_3866:16769-15633(-)	26.3	422	279	0	510	931	1	379	2.775e-38	154	1272	379	1.0	0.332	Cluster4	PoFV_scaffold_3866:16769-15633(-)	scaffold_3866	0.382792130836691	36.1767801270503	21094.0	36.0	scaffold_3866	728	36.0	33.96815107102593	0.0586245772266065	2	2.0	5.0	-	76	PoFV_scaffold_3866:16769-15633(-)	PoFV_scaffold_3866:16769-15633(-)	scaffold_3866_ORF.54;15632-16145(-)	15632.0	16145.0	-		0.4515845070422535	16769-15633	15633	16769	65.0	yes	1.0	0.0	1.0	A
PoFV_scaffold_1254_orf004	PoFV_scaffold_3866:16769-15633(-)	26.3	422	279	0	510	931	1	379	2.775e-38	154	1272	379	1.0	0.332	Cluster4	PoFV_scaffold_3866:16769-15633(-)	scaffold_3866	0.382792130836691	36.1767801270503	21094.0	36.0	scaffold_3866	728	36.0	33.96815107102593	0.0586245772266065	2	2.0	5.0	-	76	PoFV_scaffold_3866:16769-15633(-)	PoFV_scaffold_3866:16769-15633(-)	scaffold_3866_ORF.53;16151-16610(-)	16151.0	16610.0	-		0.4040492957746479	16769-15633	15633	16769	66.0	yes	1.0	0.0	1.0	A
LbFV_YP_009345700.1	PoFV_scaffold_3866:16769-15633(-)	26.2	394	278	0	438	831	2	379	3.303e-35	143	1048	379	0.997	0.376	Cluster4	PoFV_scaffold_3866:16769-15633(-)	scaffold_3866	0.382792130836691	36.1767801270503	21094.0	36.0	scaffold_3866	728	36.0	33.96815107102593	0.0586245772266065	2	2.0	5.0	-	76	PoFV_scaffold_3866:16769-15633(-)	PoFV_scaffold_3866:16769-15633(-)	scaffold_3866_ORF.54;15632-16145(-)	15632.0	16145.0	-		0.4515845070422535	16769-15633	15633	16769	65.0	yes	1.0	0.0	1.0	A
LbFV_YP_009345700.1	PoFV_scaffold_3866:16769-15633(-)	26.2	394	278	0	438	831	2	379	3.303e-35	143	1048	379	0.997	0.376	Cluster4	PoFV_scaffold_3866:16769-15633(-)	scaffold_3866	0.382792130836691	36.1767801270503	21094.0	36.0	scaffold_3866	728	36.0	33.96815107102593	0.0586245772266065	2	2.0	5.0	-	76	PoFV_scaffold_3866:16769-15633(-)	PoFV_scaffold_3866:16769-15633(-)	scaffold_3866_ORF.53;16151-16610(-)	16151.0	16610.0	-		0.4040492957746479	16769-15633	15633	16769	66.0	yes	1.0	0.0	1.0	A
DFV_QKN22516.1	PoFV_scaffold_3866:16769-15633(-)	29.5	236	156	0	503	724	15	250	4.281e-24	106	728	379	0.623	0.305	Cluster4	PoFV_scaffold_3866:16769-15633(-)	scaffold_3866	0.382792130836691	36.1767801270503	21094.0	36.0	scaffold_3866	728	36.0	33.96815107102593	0.0586245772266065	2	2.0	5.0	-	76	PoFV_scaffold_3866:16769-15633(-)	PoFV_scaffold_3866:16769-15633(-)	scaffold_3866_ORF.54;15632-16145(-)	15632.0	16145.0	-		0.4515845070422535	16769-15633	15633	16769	65.0	yes	1.0	0.0	1.0	A
DFV_QKN22516.1	PoFV_scaffold_3866:16769-15633(-)	29.5	236	156	0	503	724	15	250	4.281e-24	106	728	379	0.623	0.305	Cluster4	PoFV_scaffold_3866:16769-15633(-)	scaffold_3866	0.382792130836691	36.1767801270503	21094.0	36.0	scaffold_3866	728	36.0	33.96815107102593	0.0586245772266065	2	2.0	5.0	-	76	PoFV_scaffold_3866:16769-15633(-)	PoFV_scaffold_3866:16769-15633(-)	scaffold_3866_ORF.53;16151-16610(-)	16151.0	16610.0	-		0.4040492957746479	16769-15633	15633	16769	66.0	yes	1.0	0.0	1.0	A
PoFV_scaffold_11706_orf008	PoFV_scaffold_7821:2672-2565(-)	69.1	36	11	0	1	36	1	36	6.808e-11	53	64	36	1.0	0.562	Cluster1024	PoFV_scaffold_7821:2672-2565(-)	scaffold_7821	0.31157978511739	32.6687669960868	15077.0	33.0	scaffold_7821	123	33.0	33.96815107102593	0.2068771138669673	1			-	105	PoFV_scaffold_7821:2672-2565(-)								2672-2565	2565	2672		no	0.0	0.0	0.0	C
PoFV_scaffold_11706_orf009	PoFV_scaffold_7821:2928-2773(-)	81.5	52	9	0	6	56	1	52	1.091e-23	90	73	52	1.0	0.699	Cluster1465	PoFV_scaffold_7821:2928-2773(-)	scaffold_7821	0.31157978511739	32.6687669960868	15077.0	33.0	scaffold_7821	123	33.0	33.96815107102593	0.2068771138669673	1			-	106	PoFV_scaffold_7821:2928-2773(-)	PoFV_scaffold_7821:2928-2773(-)	scaffold_7821_ORF.32;1200-3159(-)	1200.0	3159.0	-		12.638709677419357	2928-2773	2773	2928	86.0	no	0.0	0.0	0.0	C
PoFV_scaffold_3020_orf007	PoFV_scaffold_28968:1928-1329(-)	48.2	202	103	0	4	205	1	200	8.053999999999999e-53	181	206	200	1.0	0.981	Cluster697	PoFV_scaffold_28968:1928-1329(-)	scaffold_28968	0.309888169511477	27.6373270532823	3397.0	28.0	scaffold_28968	377	28.0	33.96815107102593	0.0005636978579481	1			-	54	PoFV_scaffold_28968:1928-1329(-)	PoFV_scaffold_28968:1928-1329(-)	scaffold_28968_ORF.9;1328-1682(-)	1328.0	1682.0	-		0.5909849749582637	1928-1329	1329	1928	46.0	no	0.0	0.0	0.0	C
PoFV_scaffold_3020_orf007	PoFV_scaffold_100628:1128-551(-)	51.9	81	37	0	4	80	1	81	9.537e-19	82	206	192	0.422	0.374	Cluster697	PoFV_scaffold_100628:1128-551(-)	scaffold_100628	0.306194690265487	28.5420726306466	1129.0	30.0	scaffold_100628	206	30.0	33.96815107102593	0.0095828635851183	2	20.0	33.0	-	1	PoFV_scaffold_100628:1128-551(-)	PoFV_scaffold_100628:1128-551(-)	scaffold_100628_ORF.3;831-993(-)	831.0	993.0	-		0.2807625649913345	1128-551	551	1128	1.0	yes	0.0	0.0	0.0	C
PoFV_scaffold_21913_orf002	PoFV_scaffold_19741:1230-1403(+)	74.7	58	13	0	5	58	1	58	2.88e-24	91	59	58	1.0	0.915	Cluster712	PoFV_scaffold_19741:1230-1403(+)	scaffold_19741	0.267485119047619	27.8394418604651	5375.0	26.0	scaffold_19741	102	26.0	33.96815107102593	0.0	1			+	40	PoFV_scaffold_19741:1230-1403(+)								1230-1403	1230	1403		no	0.0	0.0	0.0	C
PoFV_scaffold_21913_orf006	PoFV_scaffold_19741:3098-3250(+)	56.6	53	22	0	3	55	1	51	7.791e-14	61	56	51	1.0	0.946	Cluster779	PoFV_scaffold_19741:3098-3250(+)	scaffold_19741	0.267485119047619	27.8394418604651	5375.0	26.0	scaffold_19741	102	26.0	33.96815107102593	0.0	1			+	42	PoFV_scaffold_19741:3098-3250(+)	PoFV_scaffold_19741:3098-3250(+)	scaffold_19741_ORF.2;3046-3262(+)	3046.0	3262.0	-		1.4210526315789471	3098-3250	3098	3250	36.0	no	0.0	0.0	0.0	C
PoFV_scaffold_21913_orf005	PoFV_scaffold_19741:2109-2870(+)	79.4	256	52	0	1	256	1	254	6.522999999999992e-134	418	257	254	1.0	0.996	Cluster1415	PoFV_scaffold_19741:2109-2870(+)	scaffold_19741	0.267485119047619	27.8394418604651	5375.0	26.0	scaffold_19741	102	26.0	33.96815107102593	0.0	1			+	41	PoFV_scaffold_19741:2109-2870(+)	PoFV_scaffold_19741:2109-2870(+)	scaffold_19741_ORF.4;2108-2870(+)	2108.0	2870.0	-		1.0013140604467805	2109-2870	2109	2870	35.0	no	0.0	0.0	0.0	C
PoFV_scaffold_3020_orf006	PoFV_scaffold_58199:1424-60(-)	36.1	499	290	0	1	499	1	455	5.219e-83	298	1068	455	1.0	0.467	Cluster296	PoFV_scaffold_58199:1424-60(-)	scaffold_58199	0.311393805309735	30.5365044247788	1808.0	32.0	scaffold_58199	1068	32.0	33.96815107102593	0.0935738444193912	2	2.0	32.0	-	90	PoFV_scaffold_58199:1424-60(-)	PoFV_scaffold_58199:1424-60(-)	scaffold_58199_ORF.6;347-1424(-)	347.0	1424.0	-		0.7895894428152492	1424-60	60	1424	74.0	yes	0.0	0.0	0.0	C
PoFV_scaffold_3020_orf006	PoFV_scaffold_110395:122-980(+)	53.5	217	95	0	202	418	1	206	4.142e-59	222	1068	286	0.72	0.203	Cluster296	PoFV_scaffold_110395:122-980(+)	scaffold_110395	0.307988450433109	30.8458574181118	1038.0	32.0	scaffold_110395	1068	32.0	33.96815107102593	0.0935738444193912	2	70.0	30.0	+	11	PoFV_scaffold_110395:122-980(+)	PoFV_scaffold_110395:122-980(+)	scaffold_110395_ORF.1;145-709(+)	145.0	709.0	-		0.6573426573426573	122-980	122	980	11.0	yes	0.0	0.0	0.0	C
PoFV_scaffold_3020_orf013	PoFV_scaffold_48333_1:305-6(-)	80.1	102	20	0	173	274	1	100	1.555e-46	170	372	100	1.0	0.274	Cluster2	PoFV_scaffold_48333_1:305-6(-)	scaffold_48333_1	0.303837953091684	36.3987206823028	3561.0	38.0	scaffold_48333_1	372	38.0	33.96815107102593	0.0095828635851183	1			-	84	PoFV_scaffold_48333_1:305-6(-)								305-6	6	305		no	0.0	0.0	0.0	C
LbFV_YP_009345647.1	PoFV_scaffold_48333_1:305-6(-)	32.0	95	59	0	138	225	2	96	9.259e-08	51	336	100	0.95	0.262	Cluster2	PoFV_scaffold_48333_1:305-6(-)	scaffold_48333_1	0.303837953091684	36.3987206823028	3561.0	38.0	scaffold_48333_1	372	38.0	33.96815107102593	0.0095828635851183	1			-	84	PoFV_scaffold_48333_1:305-6(-)								305-6	6	305		no	0.0	0.0	0.0	C
PoFV_scaffold_1254_orf002	PoFV_scaffold_5629:10228-9917(-)	31.8	104	69	0	5	106	1	104	1.243e-09	55	204	104	1.0	0.5	Cluster414	PoFV_scaffold_5629:10228-9917(-)	scaffold_5629	0.381982139730345	36.5213622833129	11422.0	36.0	scaffold_5629	204	36.0	33.96815107102593	0.0586245772266065	1			-	89	PoFV_scaffold_5629:10228-9917(-)	PoFV_scaffold_5629:10228-9917(-)	scaffold_5629_ORF.24;9700-10303(-)	9700.0	10303.0	-		1.9389067524115755	10228-9917	9917	10228	73.0	no	4.0	0.0	4.0	A
PoFV_scaffold_1254_orf002	PoFV_scaffold_5629:10228-9917(-)	31.8	104	69	0	5	106	1	104	1.243e-09	55	204	104	1.0	0.5	Cluster414	PoFV_scaffold_5629:10228-9917(-)	scaffold_5629	0.381982139730345	36.5213622833129	11422.0	36.0	scaffold_5629	204	36.0	33.96815107102593	0.0586245772266065	1			-	89	PoFV_scaffold_5629:10228-9917(-)	PoFV_scaffold_5629:10228-9917(-)	scaffold_5629_ORF.24;9700-10303(-)	9700.0	10303.0	-		1.9389067524115755	10228-9917	9917	10228	73.0	no	4.0	0.0	4.0	A
PoFV_scaffold_1254_orf002	PoFV_scaffold_5629:10228-9917(-)	31.8	104	69	0	5	106	1	104	1.243e-09	55	204	104	1.0	0.5	Cluster414	PoFV_scaffold_5629:10228-9917(-)	scaffold_5629	0.381982139730345	36.5213622833129	11422.0	36.0	scaffold_5629	204	36.0	33.96815107102593	0.0586245772266065	1			-	89	PoFV_scaffold_5629:10228-9917(-)	PoFV_scaffold_5629:10228-9917(-)	scaffold_5629_ORF.24;9700-10303(-)	9700.0	10303.0	-		1.9389067524115755	10228-9917	9917	10228	73.0	no	4.0	0.0	4.0	A
PoFV_scaffold_1254_orf002	PoFV_scaffold_5629:10228-9917(-)	31.8	104	69	0	5	106	1	104	1.243e-09	55	204	104	1.0	0.5	Cluster414	PoFV_scaffold_5629:10228-9917(-)	scaffold_5629	0.381982139730345	36.5213622833129	11422.0	36.0	scaffold_5629	204	36.0	33.96815107102593	0.0586245772266065	1			-	89	PoFV_scaffold_5629:10228-9917(-)	PoFV_scaffold_5629:10228-9917(-)	scaffold_5629_ORF.24;9700-10303(-)	9700.0	10303.0	-		1.9389067524115755	10228-9917	9917	10228	73.0	no	4.0	0.0	4.0	A
PoFV_scaffold_2702_orf014	PoFV_scaffold_9256:1524-1012(-)	60.2	174	68	0	1	174	1	171	3.645e-58	206	415	171	1.0	0.419	Cluster426	PoFV_scaffold_9256:1524-1012(-)	scaffold_9256	0.370631758679567	35.5614754098361	8784.0	36.0	scaffold_9256	415	36.0	33.96815107102593	0.0586245772266065	1			-	127	PoFV_scaffold_9256:1524-1012(-)	PoFV_scaffold_9256:1524-1012(-)	scaffold_9256_ORF.13;1011-1524(-)	1011.0	1524.0	-		1.001953125	1524-1012	1012	1524	102.0	no	0.0	0.0	0.0	C
[truncated: 6 more columns]
